# Supplementary material for: Mechanisms of Oogenesis-Related Long Non-coding RNAs in Porcine Ovaries Treated With Recombinant Pig Follicle-Stimulating Hormone
Source: Front Vet Sci. 2022 Feb 24;8:838703. doi: 10.3389/fvets.2021.838703 (PMC8908959; doi:10.3389/fvets.2021.838703)
Supplement: Supplementary file 1 [file Table_1.XLSX]

## Sheet: Sheet1
Supplymentary Table-S1 Primers of lncRNAs and mRNAs used in qPCR
Transcript type	Gene ID	Gene symbol	Primer sequence(5'->3')	Product length (bp)
mRNA	MSTRG.17162	BET1L	F：CTCAGGGCTCTCACTCCAAT	150
			R：AGAACAAGTGCTCTCGCACG
mRNA	MSTRG.22384	RSAD2	F：TGCATTGTCTGTCCCAGGTAT	108
			R：TTGACCGACAAAACACACGG
mRNA	MSTRG.7734	CCR1	F：CCTTTCTGCCTTCGTGCAAC	152
			R：GTGACAAGGCCTCCCTTCAT
mRNA	MSTRG.26744	DRC7	F：CTGCTCTCAGGCCATGTTCC	115
			R：AGGGGGTTTAAAGCTGTTGCT
mRNA	MSTRG.6209	LRRC46	F：GATGAAGCCTCGAGCGATGA	91
			R：GCAAGCCTTGGAAAACAGGG
mRNA	MSTRG.30876	CFAP161	F：TGCTTTTAGGAAACTGGAGGC	168
			R：GGCATTTTGCTGAACCCTGC
mRNA		GAPDH	F: CCCCTAACTCACCCGTTCAC	92
			R：TTGCCCCGCGATCTAATGTT
lncRNA	MSTRG.16871	MSTRG.16871.1	F：AAGGCCAGAGCATTAGCTCC	126
			R：CCTGCATGAAGAAGGCTTGC
lncRNA	MSTRG.29090	MSTRG.29090.1	F：AACCTCAAATTGGTTGCGCC	114
			R：CGTGGACCAATTGTTTTGGAGT
lncRNA	MSTRG.34178	MSTRG.34178.2	F：TAAGTGGCCAGACTGCACAA	107
			R：GGAGTTCGGTGAGGAGAACC
lncRNA	MSTRG.30735	MSTRG.30735.1	F：GCATAGGTAATTCCCACCTCCA	158
			R：TCTTGCTGAGTGTTTTCCTCT
lncRNA	MSTRG.33729	MSTRG.33729.1	F：AACAAGCACTCTAGGTCCGC	109
			R：GAACAGGCCGGATCCTCAAA
lncRNA	MSTRG.33864	MSTRG.33864.1	F：TGTGGCCCATGAGGTGTAAC	154
			R：ACCCAAATACACAGGGGTCG
		NR5A2	R：GCGTTGTCCTTACTGTCG	199
			F：GGCTTGGATCACCTGAGAC
