# Supplementary material for: Mechanisms of Oogenesis-Related Long Non-coding RNAs in Porcine Ovaries Treated With Recombinant Pig Follicle-Stimulating Hormone
Source: Front Vet Sci. 2022 Feb 24;8:838703. doi: 10.3389/fvets.2021.838703 (PMC8908959; doi:10.3389/fvets.2021.838703)
Supplement: Supplementary file 2 [file Table_2.XLSX]

## Sheet: Sheet1
Supplymentary Table S2 Quality control of the sequencing data
Sample	Raw Data		Valid Data		Valid Ratio(reads)	Q20%	Q30%	GC content%
	Read	Base	Read	Base
Control1	84853980	12.73G	78540780	11.78G	92.56	99.97	98.51	45
Control2	87895596	13.18G	81260744	12.19G	92.45	99.98	98.67	45
Control3	81995902	12.30G	76853524	11.53G	93.73	99.97	98.63	45
Control4	93361996	14.00G	87185688	13.08G	93.38	99.97	98.48	45
Control5	96713942	14.51G	89587148	13.44G	92.63	99.96	98.41	46
Treat1	88923972	13.34G	82752558	12.41G	93.06	99.98	98.62	45.5
Treat2	93496552	14.02G	86521704	12.98G	92.54	99.97	98.47	45
Treat3	83448796	12.52G	77462426	11.62G	92.83	99.97	98.53	45
Treat4	86664168	13.00G	80959736	12.14G	93.42	99.97	98.49	45
Treat5	89271778	13.39G	82432650	12.36G	92.34	99.97	98.55	45
