# Supplementary material for: Mechanisms of Oogenesis-Related Long Non-coding RNAs in Porcine Ovaries Treated With Recombinant Pig Follicle-Stimulating Hormone
Source: Front Vet Sci. 2022 Feb 24;8:838703. doi: 10.3389/fvets.2021.838703 (PMC8908959; doi:10.3389/fvets.2021.838703)
Supplement: Supplementary file 3 [file Table_3.XLSX]

## Sheet: Sheet1
Supplymentary Table S3 The information for the identified lncRNAs.
t_id	class_code	Known/Novel	CPC_Score	CNCI_Score	chr	strand	start	end	t_name	num_exons	length	gene_id	trans_type
87823	0	known	NA	NA	chrX	+	31879137	31897766	ENSSSCT00000013365	5	1312	MSTRG.35948	lincRNA
89508	0	known	NA	NA	chrX	-	95034874	95135641	ENSSSCT00000033169	5	546	MSTRG.36657	lincRNA
40486	0	known	NA	NA	chr18	+	47796172	47811834	ENSSSCT00000036872	4	1030	ENSSSCG00000038124	lincRNA
13539	0	known	NA	NA	chr12	+	8402196	8540383	ENSSSCT00000036938	4	5851	MSTRG.5818	lincRNA
12648	0	known	NA	NA	chr11	+	69511284	69651155	ENSSSCT00000036943	4	837	MSTRG.5461	lincRNA
74536	0	known	NA	NA	chr7	+	33125695	33128459	ENSSSCT00000037101	4	1559	ENSSSCG00000040672	lincRNA
52841	0	known	NA	NA	chr3	-	82585440	82946135	ENSSSCT00000037111	10	1395	MSTRG.21764	lincRNA
63167	0	known	NA	NA	chr5	+	73898262	73947234	ENSSSCT00000037189	5	1829	ENSSSCG00000039286	lincRNA
56348	0	known	NA	NA	chr4	+	70518311	70530223	ENSSSCT00000037195	5	1399	ENSSSCG00000039702	lincRNA
23442	0	known	NA	NA	chr13	-	179508931	179578118	ENSSSCT00000037207	8	1260	ENSSSCG00000038495	lincRNA
53002	0	known	NA	NA	chr3	-	91183454	91239012	ENSSSCT00000037231	4	4340	MSTRG.21832	lincRNA
23515	0	known	NA	NA	chr13	+	184157282	184446361	ENSSSCT00000037389	4	3625	ENSSSCG00000038421	lincRNA
8767	0	known	NA	NA	chr10	-	15279669	15301326	ENSSSCT00000037412	8	2336	MSTRG.3756	lincRNA
72568	0	known	NA	NA	chr6	-	169884461	169999612	ENSSSCT00000037492	7	2416	MSTRG.29779	lincRNA
20064	0	known	NA	NA	chr13	-	68229013	68259980	ENSSSCT00000037520	4	1145	MSTRG.8451	lincRNA
54617	0	known	NA	NA	chr4	+	940773	944663	ENSSSCT00000037621	4	1095	MSTRG.22481	lincRNA
30454	0	known	NA	NA	chr15	-	9974962	10585430	ENSSSCT00000037718	5	1465	ENSSSCG00000031528	lincRNA
56272	0	known	NA	NA	chr4	+	67844438	67847920	ENSSSCT00000037728	4	729	MSTRG.23189	lincRNA
57357	0	known	NA	NA	chr4	+	93660534	93670066	ENSSSCT00000037777	4	6267	MSTRG.23572	lincRNA
54335	0	known	NA	NA	chr3	+	127680143	127790876	ENSSSCT00000037967	6	2448	ENSSSCG00000037383	lincRNA
70656	0	known	NA	NA	chr6	-	107278748	107282210	ENSSSCT00000038071	4	1176	MSTRG.28955	lincRNA
72907	0	known	NA	NA	chr7	+	7608189	7635391	ENSSSCT00000038143	8	2068	ENSSSCG00000035032	lincRNA
63821	0	known	NA	NA	chr5	-	90560762	90566176	ENSSSCT00000038359	4	1531	ENSSSCG00000031633	lincRNA
45984	0	known	NA	NA	chr2	+	77977669	78009290	ENSSSCT00000038404	4	1872	MSTRG.18862	lincRNA
1506	0	known	NA	NA	chr1	-	45856974	46011800	ENSSSCT00000038411	4	2242	ENSSSCG00000032037	lincRNA
47092	0	known	NA	NA	chr2	+	109413790	109487261	ENSSSCT00000038599	4	1344	MSTRG.19294	lincRNA
17689	0	known	NA	NA	chr13	+	14969863	15188311	ENSSSCT00000038635	5	1583	MSTRG.7503	lincRNA
72172	0	known	NA	NA	chr6	-	163619102	163624420	ENSSSCT00000038660	4	1695	MSTRG.29631	lincRNA
13899	0	known	NA	NA	chr12	-	16418630	16442927	ENSSSCT00000038717	16	1497	ENSSSCG00000038464	lincRNA
23318	0	known	NA	NA	chr13	+	166979297	167254436	ENSSSCT00000038772	8	3026	ENSSSCG00000039306	lincRNA
10909	0	known	NA	NA	chr10	-	68578573	68621321	ENSSSCT00000039015	4	2586	MSTRG.4701	lincRNA
86211	0	known	NA	NA	chr9	-	109095821	109166758	ENSSSCT00000039038	4	1605	MSTRG.35253	lincRNA
62444	0	known	NA	NA	chr5	+	61703680	61715518	ENSSSCT00000039041	5	2853	ENSSSCG00000037074	lincRNA
87077	0	known	NA	NA	chr9	+	133527206	133559898	ENSSSCT00000039099	5	1403	MSTRG.35646	lincRNA
70657	0	known	NA	NA	chr6	-	107278748	107282210	ENSSSCT00000039186	4	1217	MSTRG.28955	lincRNA
79711	0	known	NA	NA	chr8	+	46865920	46919752	ENSSSCT00000039323	4	1035	ENSSSCG00000039268	lincRNA
62577	0	known	NA	NA	chr5	-	63403709	63407269	ENSSSCT00000039452	4	1295	ENSSSCG00000033203	lincRNA
78786	0	known	NA	NA	chr8	+	9305256	9487673	ENSSSCT00000039558	4	1873	MSTRG.32309	lincRNA
11315	0	known	NA	NA	chr11	-	6866623	6906338	ENSSSCT00000039623	5	2027	MSTRG.4855	lincRNA
45653	0	known	NA	NA	chr2	-	75547473	75550616	ENSSSCT00000039648	4	1198	MSTRG.18742	lincRNA
78613	0	known	NA	NA	chr8	-	2312523	2318635	ENSSSCT00000039809	4	3677	ENSSSCG00000031374	lincRNA
63168	0	known	NA	NA	chr5	+	73909240	73947405	ENSSSCT00000039862	4	2177	ENSSSCG00000039286	lincRNA
30396	0	known	NA	NA	chr15	-	6222423	6266771	ENSSSCT00000039872	4	528	ENSSSCG00000036561	lincRNA
56571	0	known	NA	NA	chr4	-	79322942	79328061	ENSSSCT00000039920	6	1297	ENSSSCG00000032052	lincRNA
79120	0	known	NA	NA	chr8	+	28328962	28431393	ENSSSCT00000040067	4	1165	ENSSSCG00000035159	lincRNA
62798	0	known	NA	NA	chr5	-	65662750	65676985	ENSSSCT00000040140	4	1010	ENSSSCG00000039754	lincRNA
38596	0	known	NA	NA	chr17	-	62508516	62514843	ENSSSCT00000040180	5	1274	ENSSSCG00000034454	lincRNA
32522	0	known	NA	NA	chr15	+	92029322	92124435	ENSSSCT00000040227	4	1552	ENSSSCG00000038276	lincRNA
22997	0	known	NA	NA	chr13	-	152169517	152295888	ENSSSCT00000040236	4	1312	MSTRG.9717	lincRNA
77060	0	known	NA	NA	chr7	-	85697269	85715208	ENSSSCT00000040397	4	1925	ENSSSCG00000034247	lincRNA
5967	0	known	NA	NA	chr1	+	207504016	207552227	ENSSSCT00000040410	6	1480	MSTRG.2554	lincRNA
34984	0	known	NA	NA	chr16	-	37101153	37176079	ENSSSCT00000040455	4	1556	MSTRG.14623	lincRNA
33856	0	known	NA	NA	chr15	+	133014497	133032001	ENSSSCT00000040493	6	3078	ENSSSCG00000040169	lincRNA
87741	0	known	NA	NA	chrX	-	23449534	23495041	ENSSSCT00000040513	4	744	ENSSSCG00000035137	lincRNA
85531	0	known	NA	NA	chr9	+	82064832	82080508	ENSSSCT00000040532	4	5560	MSTRG.34976	lincRNA
8467	0	known	NA	NA	chr10	+	11014225	11034053	ENSSSCT00000040543	5	2948	MSTRG.3616	lincRNA
63458	0	known	NA	NA	chr5	+	81118160	81194859	ENSSSCT00000040587	4	1027	ENSSSCG00000034578	lincRNA
11454	0	known	NA	NA	chr11	+	9913075	10135147	ENSSSCT00000040594	6	2009	MSTRG.4927	lincRNA
31662	0	known	NA	NA	chr15	-	63211607	63368797	ENSSSCT00000040801	4	551	ENSSSCG00000040024	lincRNA
51510	0	known	NA	NA	chr3	+	44827899	45026074	ENSSSCT00000040867	6	2316	MSTRG.21225	lincRNA
65877	0	known	NA	NA	chr6	-	43583375	43605028	ENSSSCT00000040900	5	1486	MSTRG.27118	lincRNA
22041	0	known	NA	NA	chr13	-	131098272	131125504	ENSSSCT00000040987	4	2675	ENSSSCG00000039561	lincRNA
10757	0	known	NA	NA	chr10	-	64192432	64200473	ENSSSCT00000040989	4	4909	ENSSSCG00000038601	lincRNA
28021	0	known	NA	NA	chr14	-	81119486	81137601	ENSSSCT00000041096	4	857	ENSSSCG00000036879	lincRNA
38595	0	known	NA	NA	chr17	-	62508504	62514852	ENSSSCT00000041142	5	1244	ENSSSCG00000034454	lincRNA
67702	0	known	NA	NA	chr6	-	59239779	59254650	ENSSSCT00000041219	9	3686	MSTRG.27797	lincRNA
59194	0	known	NA	NA	chr4	-	125359489	125365843	ENSSSCT00000041318	4	1779	ENSSSCG00000035043	lincRNA
47498	0	known	NA	NA	chr2	-	127279958	127644913	ENSSSCT00000041452	4	1059	ENSSSCG00000040936	lincRNA
40702	0	known	NA	NA	chr18	-	52351577	52390988	ENSSSCT00000041457	4	1662	MSTRG.17088	lincRNA
9416	0	known	NA	NA	chr10	-	28904327	28995461	ENSSSCT00000041574	6	1616	MSTRG.4043	lincRNA
51638	0	known	NA	NA	chr3	-	48617909	48648331	ENSSSCT00000041579	7	4914	MSTRG.21278	lincRNA
1887	0	known	NA	NA	chr1	+	66896959	66971110	ENSSSCT00000041582	4	792	ENSSSCG00000032685	lincRNA
46388	0	known	NA	NA	chr2	-	83380587	83621208	ENSSSCT00000041666	4	2454	MSTRG.18991	lincRNA
35354	0	known	NA	NA	chr16	-	48644467	48693634	ENSSSCT00000041878	7	2223	ENSSSCG00000039883	lincRNA
84704	0	known	NA	NA	chr9	-	55005367	55061887	ENSSSCT00000041899	4	1356	MSTRG.34658	lincRNA
59137	0	known	NA	NA	chr4	-	124658018	124670507	ENSSSCT00000041947	4	3315	MSTRG.24263	lincRNA
4565	0	known	NA	NA	chr1	+	159665706	159792027	ENSSSCT00000042012	6	886	ENSSSCG00000034988	lincRNA
88287	0	known	NA	NA	chrX	+	45772497	45798482	ENSSSCT00000042113	5	2760	MSTRG.36143	lincRNA
54362	0	known	NA	NA	chr3	-	129586315	129612836	ENSSSCT00000042244	4	2981	ENSSSCG00000033103	lincRNA
4888	0	known	NA	NA	chr1	-	167575417	167781197	ENSSSCT00000042394	10	3377	MSTRG.2090	lincRNA
53260	0	known	NA	NA	chr3	-	97418264	97567710	ENSSSCT00000042440	6	3050	MSTRG.21947	lincRNA
75082	0	known	NA	NA	chr7	+	45015518	45275923	ENSSSCT00000042525	5	927	ENSSSCG00000035274	lincRNA
12153	0	known	NA	NA	chr11	+	34442968	34468728	ENSSSCT00000042739	4	1293	ENSSSCG00000034523	lincRNA
20646	0	known	NA	NA	chr13	+	82485587	82547810	ENSSSCT00000042840	11	5748	MSTRG.8699	lincRNA
48345	0	known	NA	NA	chr2	-	146524651	146621874	ENSSSCT00000042955	5	754	ENSSSCG00000039356	lincRNA
46987	0	known	NA	NA	chr2	+	104927171	105003398	ENSSSCT00000042978	4	1393	ENSSSCG00000035096	lincRNA
57242	0	known	NA	NA	chr4	+	92517843	92535863	ENSSSCT00000043006	5	1849	ENSSSCG00000035416	lincRNA
20065	0	known	NA	NA	chr13	-	68229013	68260269	ENSSSCT00000043048	4	1240	MSTRG.8451	lincRNA
59619	0	known	NA	NA	chr5	-	3409263	3436174	ENSSSCT00000043059	4	1718	MSTRG.24460	lincRNA
70986	0	known	NA	NA	chr6	+	124034968	124208825	ENSSSCT00000043114	6	2847	ENSSSCG00000031460	lincRNA
1927	0	known	NA	NA	chr1	+	71831528	71837025	ENSSSCT00000043223	4	431	MSTRG.838	lincRNA
52840	0	known	NA	NA	chr3	-	82585440	82771712	ENSSSCT00000043469	9	1531	MSTRG.21764	lincRNA
62445	0	known	NA	NA	chr5	+	61703680	61715518	ENSSSCT00000043491	4	3099	ENSSSCG00000037074	lincRNA
29070	0	known	NA	NA	chr14	-	111977882	111979967	ENSSSCT00000043519	4	604	MSTRG.12212	lincRNA
59022	0	known	NA	NA	chr4	+	122648447	122792723	ENSSSCT00000043536	6	4926	ENSSSCG00000039531	lincRNA
1711	0	known	NA	NA	chr1	+	56184771	56274861	ENSSSCT00000043574	5	5005	ENSSSCG00000038663	lincRNA
80452	0	known	NA	NA	chr8	-	74174452	74217729	ENSSSCT00000043577	4	663	MSTRG.32992	lincRNA
20780	0	known	NA	NA	chr13	+	88215431	88365945	ENSSSCT00000043594	4	3263	ENSSSCG00000034422	lincRNA
35353	0	known	NA	NA	chr16	-	48644466	48693635	ENSSSCT00000043666	5	1267	ENSSSCG00000039883	lincRNA
4871	0	known	NA	NA	chr1	+	166925031	167002317	ENSSSCT00000043675	4	2073	ENSSSCG00000040442	lincRNA
33855	0	known	NA	NA	chr15	+	133014490	133032001	ENSSSCT00000043729	5	4631	ENSSSCG00000040169	lincRNA
8331	0	known	NA	NA	chr10	+	3699470	3713720	ENSSSCT00000043850	4	682	ENSSSCG00000035395	lincRNA
77257	0	known	NA	NA	chr7	+	91231631	91245669	ENSSSCT00000043932	4	2470	ENSSSCG00000036829	lincRNA
86680	0	known	NA	NA	chr9	+	123602691	123606243	ENSSSCT00000043947	4	654	ENSSSCG00000038516	lincRNA
70985	0	known	NA	NA	chr6	-	123634871	123714470	ENSSSCT00000044018	6	2686	ENSSSCG00000033723	lincRNA
74130	0	known	NA	NA	chr7	-	27309814	27330013	ENSSSCT00000044123	5	1503	ENSSSCG00000032093	lincRNA
36209	0	known	NA	NA	chr17	+	2737649	3019300	ENSSSCT00000044136	4	2342	MSTRG.15203	lincRNA
51828	0	known	NA	NA	chr3	-	55074775	55108182	ENSSSCT00000044138	5	1178	MSTRG.21358	lincRNA
90136	0	known	NA	NA	chrX	+	121776887	121794571	ENSSSCT00000044246	10	4943	ENSSSCG00000031801	lincRNA
84349	0	known	NA	NA	chr9	+	46682876	46685645	ENSSSCT00000044260	4	2012	ENSSSCG00000036265	lincRNA
71342	0	known	NA	NA	chr6	-	140628921	140779649	ENSSSCT00000044275	4	1065	MSTRG.29236	lincRNA
1633	0	known	NA	NA	chr1	-	54017277	54180269	ENSSSCT00000044309	4	536	MSTRG.711	lincRNA
1583	0	known	NA	NA	chr1	-	51369901	51429587	ENSSSCT00000044507	5	3343	MSTRG.696	lincRNA
87294	0	known	NA	NA	chrX	+	4206139	4375014	ENSSSCT00000044509	4	812	ENSSSCG00000034434	lincRNA
72782	0	known	NA	NA	chr7	-	2522668	2568459	ENSSSCT00000044552	4	3882	ENSSSCG00000033701	lincRNA
77221	0	known	NA	NA	chr7	-	89744859	89765147	ENSSSCT00000044593	5	6507	ENSSSCG00000032482	lincRNA
55777	0	known	NA	NA	chr4	+	43370599	43394583	ENSSSCT00000044594	4	702	ENSSSCG00000036325	lincRNA
40039	0	known	NA	NA	chr18	+	33193085	33197711	ENSSSCT00000044651	5	2639	MSTRG.16781	lincRNA
56870	0	known	NA	NA	chr4	+	86919184	86929916	ENSSSCT00000044673	4	1514	ENSSSCG00000033029	lincRNA
40703	0	known	NA	NA	chr18	-	52367618	52403124	ENSSSCT00000044706	6	3187	MSTRG.17088	lincRNA
54119	0	known	NA	NA	chr3	+	119178316	119203329	ENSSSCT00000044944	5	1762	MSTRG.22309	lincRNA
48339	0	known	NA	NA	chr2	-	145419449	145644372	ENSSSCT00000044976	5	713	ENSSSCG00000036344	lincRNA
77222	0	known	NA	NA	chr7	-	89744985	89765147	ENSSSCT00000045021	4	5846	ENSSSCG00000032482	lincRNA
39785	0	known	NA	NA	chr18	-	22339155	22629103	ENSSSCT00000045050	4	4415	ENSSSCG00000037665	lincRNA
61862	0	known	NA	NA	chr5	+	43223310	43352875	ENSSSCT00000045053	5	1605	MSTRG.25300	lincRNA
72600	0	known	NA	NA	chr6	-	170290225	170299234	ENSSSCT00000045208	4	3233	ENSSSCG00000040760	lincRNA
54338	0	known	NA	NA	chr3	+	127911446	127944756	ENSSSCT00000045283	6	5595	ENSSSCG00000031948	lincRNA
78956	0	known	NA	NA	chr8	+	16430749	16498477	ENSSSCT00000045294	4	3192	ENSSSCG00000037282	lincRNA
65793	0	known	NA	NA	chr6	-	41667087	41683432	ENSSSCT00000045300	4	702	MSTRG.27078	lincRNA
8769	0	known	NA	NA	chr10	-	15290389	15314943	ENSSSCT00000045351	7	4324	MSTRG.3756	lincRNA
13181	0	known	NA	NA	chr12	+	3698864	3705678	ENSSSCT00000045534	4	1869	ENSSSCG00000033455	lincRNA
1710	0	known	NA	NA	chr1	+	56092544	56271772	ENSSSCT00000045603	4	2246	ENSSSCG00000038663	lincRNA
31874	0	known	NA	NA	chr15	-	68057757	68107339	ENSSSCT00000045730	4	2123	MSTRG.13372	lincRNA
52996	0	known	NA	NA	chr3	-	90400265	90419486	ENSSSCT00000045746	4	426	MSTRG.21826	lincRNA
30395	0	known	NA	NA	chr15	-	6087526	6161651	ENSSSCT00000045762	4	4426	ENSSSCG00000037285	lincRNA
5975	0	known	NA	NA	chr1	-	208140159	208180014	ENSSSCT00000045941	4	1744	MSTRG.2558	lincRNA
4357	0	known	NA	NA	chr1	-	145861206	145880125	ENSSSCT00000046058	4	963	ENSSSCG00000037335	lincRNA
54941	0	known	NA	NA	chr4	+	12596051	12631394	ENSSSCT00000046087	4	1575	ENSSSCG00000033717	lincRNA
8810	0	known	NA	NA	chr10	-	16943885	16965607	ENSSSCT00000046094	4	4489	ENSSSCG00000035431	lincRNA
6477	0	known	NA	NA	chr1	+	233025365	233336379	ENSSSCT00000046143	6	1431	ENSSSCG00000033972	lincRNA
90135	0	known	NA	NA	chrX	+	121776887	121792691	ENSSSCT00000046172	6	6164	ENSSSCG00000031801	lincRNA
38597	0	known	NA	NA	chr17	-	62508516	62514847	ENSSSCT00000046210	4	1175	ENSSSCG00000034454	lincRNA
22040	0	known	NA	NA	chr13	-	131036951	131067815	ENSSSCT00000046233	4	1843	ENSSSCG00000038441	lincRNA
28020	0	known	NA	NA	chr14	-	81095416	81114379	ENSSSCT00000046290	5	5873	MSTRG.11735	lincRNA
67703	0	known	NA	NA	chr6	-	59240251	59254652	ENSSSCT00000046345	5	2854	MSTRG.27797	lincRNA
28413	0	known	NA	NA	chr14	-	96622430	97038967	ENSSSCT00000046370	5	1875	MSTRG.11892	lincRNA
57355	0	known	NA	NA	chr4	+	93651708	93670067	ENSSSCT00000046414	5	3822	MSTRG.23572	lincRNA
24750	0	known	NA	NA	chr14	+	13229613	13260693	ENSSSCT00000046476	4	1570	ENSSSCG00000031914	lincRNA
17526	0	known	NA	NA	chr13	-	8917219	9582534	ENSSSCT00000046491	4	2269	MSTRG.7393	lincRNA
61737	0	known	NA	NA	chr5	-	39469512	39526428	ENSSSCT00000046536	4	1093	ENSSSCG00000040544	lincRNA
4889	0	known	NA	NA	chr1	-	167575790	167781222	ENSSSCT00000046559	7	2641	MSTRG.2090	lincRNA
28210	0	known	NA	NA	chr14	-	88182059	88273367	ENSSSCT00000046778	4	773	MSTRG.11808	lincRNA
54519	0	known	NA	NA	chr4	-	432873	442004	ENSSSCT00000046804	4	2962	ENSSSCG00000040582	lincRNA
48805	0	known	NA	NA	chr3	+	3996877	4010579	ENSSSCT00000046823	5	1437	MSTRG.20072	lincRNA
85041	0	known	NA	NA	chr9	+	66696501	66723911	ENSSSCT00000046899	6	4897	ENSSSCG00000032017	lincRNA
13901	0	known	NA	NA	chr12	-	16459719	16483292	ENSSSCT00000046923	7	760	ENSSSCG00000031841	lincRNA
139	0	known	NA	NA	chr1	-	2774647	2782990	ENSSSCT00000047024	4	2957	ENSSSCG00000036448	lincRNA
13215	0	known	NA	NA	chr12	-	4238196	4249964	ENSSSCT00000047026	4	1697	ENSSSCG00000035507	lincRNA
4084	0	known	NA	NA	chr1	+	135887799	136019341	ENSSSCT00000047037	5	5112	MSTRG.1755	lincRNA
48611	0	known	NA	NA	chr3	-	72251	140482	ENSSSCT00000047046	14	1562	MSTRG.19969	lincRNA
62782	0	known	NA	NA	chr5	-	65325011	65331050	ENSSSCT00000047093	4	1147	ENSSSCG00000034889	lincRNA
40040	0	known	NA	NA	chr18	+	33193119	33196903	ENSSSCT00000047185	4	1688	MSTRG.16781	lincRNA
32701	0	known	NA	NA	chr15	+	96548651	96589663	ENSSSCT00000047216	4	3206	MSTRG.13711	lincRNA
13180	0	known	NA	NA	chr12	+	3698830	3707258	ENSSSCT00000047491	4	2491	ENSSSCG00000033455	lincRNA
1929	0	known	NA	NA	chr1	-	72084826	72094592	ENSSSCT00000047535	4	1348	ENSSSCG00000034393	lincRNA
56414	0	known	NA	NA	chr4	-	73763093	73809158	ENSSSCT00000047563	6	1882	ENSSSCG00000033386	lincRNA
45983	0	known	NA	NA	chr2	+	77977459	78009289	ENSSSCT00000047801	4	2219	MSTRG.18862	lincRNA
61763	0	known	NA	NA	chr5	-	41172539	41424734	ENSSSCT00000047943	5	4666	MSTRG.25260	lincRNA
90137	0	known	NA	NA	chrX	+	121776899	121932076	ENSSSCT00000048121	10	5679	ENSSSCG00000031801	lincRNA
40109	0	known	NA	NA	chr18	-	36674593	36717073	ENSSSCT00000048127	4	2014	MSTRG.16820	lincRNA
56597	0	known	NA	NA	chr4	-	80237048	80349289	ENSSSCT00000048162	4	700	MSTRG.23329	lincRNA
56343	0	known	NA	NA	chr4	-	69940392	69974892	ENSSSCT00000048229	4	2750	ENSSSCG00000040677	lincRNA
85042	0	known	NA	NA	chr9	+	66696501	66723911	ENSSSCT00000048342	4	4741	ENSSSCG00000032017	lincRNA
23853	0	known	NA	NA	chr13	+	199291488	199297652	ENSSSCT00000048494	4	1627	ENSSSCG00000036894	lincRNA
32799	0	known	NA	NA	chr15	+	102526616	102561326	ENSSSCT00000048713	4	1822	ENSSSCG00000040152	lincRNA
6298	0	known	NA	NA	chr1	-	224262223	224766969	ENSSSCT00000048723	4	3698	MSTRG.2709	lincRNA
6226	0	known	NA	NA	chr1	+	221626463	221633076	ENSSSCT00000048765	4	2047	MSTRG.2670	lincRNA
55098	0	known	NA	NA	chr4	-	17809041	17820005	ENSSSCT00000048772	4	916	ENSSSCG00000033531	lincRNA
56682	0	known	NA	NA	chr4	-	82041226	82159971	ENSSSCT00000049002	4	996	ENSSSCG00000033890	lincRNA
22927	0	known	NA	NA	chr13	-	148860405	148894721	ENSSSCT00000049171	4	360	ENSSSCG00000037627	lincRNA
36054	0	known	NA	NA	chr16	-	78301444	78305338	ENSSSCT00000049294	4	934	ENSSSCG00000038028	lincRNA
8392	0	known	NA	NA	chr10	-	8559281	8946372	ENSSSCT00000049318	10	1820	MSTRG.3583	lincRNA
4402	0	known	NA	NA	chr1	-	147939952	147963552	ENSSSCT00000049397	4	1873	ENSSSCG00000034069	lincRNA
56002	0	known	NA	NA	chr4	+	57020141	57032829	ENSSSCT00000049432	4	3069	ENSSSCG00000031362	lincRNA
64604	0	known	NA	NA	chr6	+	10795751	10807448	ENSSSCT00000049505	5	636	MSTRG.26543	lincRNA
51639	0	known	NA	NA	chr3	-	48617911	48648340	ENSSSCT00000049656	8	5139	MSTRG.21278	lincRNA
9208	0	known	NA	NA	chr10	-	24956906	24976482	ENSSSCT00000049660	10	1413	ENSSSCG00000032301	lincRNA
40892	0	known	NA	NA	chr2	-	171583	192795	ENSSSCT00000049750	4	919	MSTRG.17175	lincRNA
50843	0	known	NA	NA	chr3	-	39261903	39264019	ENSSSCT00000049770	4	1102	MSTRG.20979	lincRNA
20647	0	known	NA	NA	chr13	+	82485587	82547810	ENSSSCT00000049792	10	6193	MSTRG.8699	lincRNA
9668	0	known	NA	NA	chr10	+	35448134	35761269	ENSSSCT00000049859	4	1041	ENSSSCG00000032000	lincRNA
48749	0	known	NA	NA	chr3	+	2360839	2366379	ENSSSCT00000049975	4	1278	ENSSSCG00000033282	lincRNA
42759	0	known	NA	NA	chr2	-	18618271	18726355	ENSSSCT00000049986	4	698	MSTRG.17703	lincRNA
10866	0	known	NA	NA	chr10	-	66433253	66436118	ENSSSCT00000050094	4	1079	ENSSSCG00000038429	lincRNA
57243	0	known	NA	NA	chr4	+	92517898	92535787	ENSSSCT00000050109	5	1822	ENSSSCG00000035416	lincRNA
33110	0	known	NA	NA	chr15	-	110208531	110247424	ENSSSCT00000050233	4	925	ENSSSCG00000039039	lincRNA
62578	0	known	NA	NA	chr5	-	63403709	63407269	ENSSSCT00000050280	5	887	ENSSSCG00000033203	lincRNA
9016	0	known	NA	NA	chr10	-	22579841	22649479	ENSSSCT00000050323	10	2094	MSTRG.3891	lincRNA
58857	0	known	NA	NA	chr4	+	115541053	115583665	ENSSSCT00000050349	6	6390	MSTRG.24162	lincRNA
40110	0	known	NA	NA	chr18	-	36704947	36717073	ENSSSCT00000050464	4	2049	MSTRG.16820	lincRNA
63452	0	known	NA	NA	chr5	+	80549280	80559675	ENSSSCT00000050497	4	2053	ENSSSCG00000033064	lincRNA
1888	0	known	NA	NA	chr1	-	67040173	67110910	ENSSSCT00000050522	4	429	ENSSSCG00000031404	lincRNA
4266	0	known	NA	NA	chr1	-	142234880	142243502	ENSSSCT00000050573	4	513	ENSSSCG00000033031	lincRNA
78954	0	known	NA	NA	chr8	+	15482806	15987814	ENSSSCT00000050592	5	1195	ENSSSCG00000034910	lincRNA
54337	0	known	NA	NA	chr3	+	127890856	127939869	ENSSSCT00000050593	7	5525	ENSSSCG00000031948	lincRNA
24861	0	known	NA	NA	chr14	+	15958585	15994213	ENSSSCT00000050607	4	3323	ENSSSCG00000038198	lincRNA
71343	0	known	NA	NA	chr6	-	140638364	140910513	ENSSSCT00000050810	5	2475	MSTRG.29237	lincRNA
33323	0	known	NA	NA	chr15	-	119517275	119658752	ENSSSCT00000050859	4	1550	ENSSSCG00000033265	lincRNA
49541	0	known	NA	NA	chr3	-	12662043	12962229	ENSSSCT00000050894	4	1055	ENSSSCG00000036217	lincRNA
73129	0	known	NA	NA	chr7	+	14318595	14633357	ENSSSCT00000050925	6	5352	ENSSSCG00000037166	lincRNA
87079	0	known	NA	NA	chr9	+	133645033	133652286	ENSSSCT00000050966	4	1373	ENSSSCG00000031285	lincRNA
23514	0	known	NA	NA	chr13	+	184157282	184415692	ENSSSCT00000051000	4	670	ENSSSCG00000038421	lincRNA
41812	0	known	NA	NA	chr2	+	8772327	8779651	ENSSSCT00000051047	4	556	ENSSSCG00000038346	lincRNA
12778	0	known	NA	NA	chr11	-	78263456	78268290	ENSSSCT00000051066	4	1506	ENSSSCG00000031704	lincRNA
46804	0	known	NA	NA	chr2	+	95824295	95866237	ENSSSCT00000051073	5	558	ENSSSCG00000038476	lincRNA
46803	0	known	NA	NA	chr2	+	95824275	95866305	ENSSSCT00000051358	6	746	ENSSSCG00000038476	lincRNA
61	0	known	NA	NA	chr1	-	919554	924549	ENSSSCT00000051384	4	3135	ENSSSCG00000035661	lincRNA
10823	0	known	NA	NA	chr10	-	65369172	65372497	ENSSSCT00000051403	4	460	ENSSSCG00000031414	lincRNA
70988	0	known	NA	NA	chr6	-	125354757	125493965	ENSSSCT00000051432	5	1924	ENSSSCG00000038382	lincRNA
43085	0	known	NA	NA	chr2	+	28814084	28817770	ENSSSCT00000051466	5	1336	MSTRG.17884	lincRNA
77057	0	known	NA	NA	chr7	-	85613437	85629935	ENSSSCT00000051468	4	3442	ENSSSCG00000038216	lincRNA
73315	0	known	NA	NA	chr7	+	19965697	19979151	ENSSSCT00000051473	4	2519	MSTRG.30146	lincRNA
9206	0	known	NA	NA	chr10	-	24956426	24969507	ENSSSCT00000051485	7	1919	ENSSSCG00000032301	lincRNA
67704	0	known	NA	NA	chr6	-	59240298	59251300	ENSSSCT00000051515	4	2910	MSTRG.27797	lincRNA
31318	0	known	NA	NA	chr15	+	48784307	48835517	ENSSSCT00000051559	4	4257	ENSSSCG00000040467	lincRNA
40734	0	known	NA	NA	chr18	+	52995077	53002214	ENSSSCT00000051609	4	2569	ENSSSCG00000034662	lincRNA
13179	0	known	NA	NA	chr12	+	3692186	3696820	ENSSSCT00000051636	4	3082	ENSSSCG00000031092	lincRNA
17693	0	known	NA	NA	chr13	+	15182036	15188309	ENSSSCT00000051710	4	1349	MSTRG.7503	lincRNA
4086	0	known	NA	NA	chr1	+	135902085	136015475	ENSSSCT00000051723	4	5179	MSTRG.1755	lincRNA
13898	0	known	NA	NA	chr12	-	16373726	16418238	ENSSSCT00000051832	14	1157	ENSSSCG00000034856	lincRNA
15051	0	known	NA	NA	chr12	-	30975063	31085020	ENSSSCT00000051878	5	1298	MSTRG.6317	lincRNA
50419	0	known	NA	NA	chr3	-	28896126	28914765	ENSSSCT00000051883	4	1007	ENSSSCG00000036428	lincRNA
39984	0	known	NA	NA	chr18	+	30192179	30233992	ENSSSCT00000052071	4	444	ENSSSCG00000040829	lincRNA
26	0	known	NA	NA	chr1	+	470506	475345	ENSSSCT00000052221	4	1876	ENSSSCG00000035944	lincRNA
14855	0	known	NA	NA	chr12	-	25760427	25765682	ENSSSCT00000052248	4	539	MSTRG.6252	lincRNA
53756	0	known	NA	NA	chr3	+	111487814	111496506	ENSSSCT00000052332	4	2283	MSTRG.22158	lincRNA
28113	0	known	NA	NA	chr14	-	84556677	84831020	ENSSSCT00000052342	5	784	MSTRG.11764	lincRNA
23166	0	known	NA	NA	chr13	+	159540281	159671459	ENSSSCT00000052665	4	2830	ENSSSCG00000039367	lincRNA
77058	0	known	NA	NA	chr7	-	85614641	85629842	ENSSSCT00000052705	5	2060	ENSSSCG00000038216	lincRNA
40419	0	known	NA	NA	chr18	+	45953756	45976219	ENSSSCT00000052811	4	1111	ENSSSCG00000033943	lincRNA
54772	0	known	NA	NA	chr4	-	5036956	5039933	ENSSSCT00000052974	4	561	ENSSSCG00000033680	lincRNA
3602	0	known	NA	NA	chr1	+	126891672	126894854	ENSSSCT00000052986	4	1419	MSTRG.1549	lincRNA
86681	0	known	NA	NA	chr9	+	123602691	123611785	ENSSSCT00000053008	4	701	ENSSSCG00000038516	lincRNA
67926	0	known	NA	NA	chr6	+	61308456	61489219	ENSSSCT00000053015	8	1749	ENSSSCG00000035785	lincRNA
74659	0	known	NA	NA	chr7	-	36630450	36635417	ENSSSCT00000053090	4	858	ENSSSCG00000032274	lincRNA
33590	0	known	NA	NA	chr15	-	124946377	124959572	ENSSSCT00000053112	4	1825	ENSSSCG00000032296	lincRNA
4542	0	known	NA	NA	chr1	+	159022355	159093270	ENSSSCT00000053201	5	1221	MSTRG.1917	lincRNA
56683	0	known	NA	NA	chr4	+	82125992	82145079	ENSSSCT00000053234	4	2198	ENSSSCG00000036538	lincRNA
40701	0	known	NA	NA	chr18	-	52291430	52309547	ENSSSCT00000053244	4	965	ENSSSCG00000031565	lincRNA
50103	0	known	NA	NA	chr3	+	21638532	21650281	ENSSSCT00000053319	5	5762	MSTRG.20635	lincRNA
10255	0	known	NA	NA	chr10	-	50260663	50268887	ENSSSCT00000053352	4	4653	ENSSSCG00000031978	lincRNA
71150	0	known	NA	NA	chr6	-	134946697	135056872	ENSSSCT00000053363	4	467	MSTRG.29143	lincRNA
72601	0	known	NA	NA	chr6	-	170291679	170299268	ENSSSCT00000053420	4	2765	ENSSSCG00000040760	lincRNA
76260	0	known	NA	NA	chr7	+	71829202	72196763	ENSSSCT00000053429	4	4121	MSTRG.31330	lincRNA
59173	0	known	NA	NA	chr4	+	125083059	125091752	ENSSSCT00000053688	4	1290	ENSSSCG00000036648	lincRNA
77042	0	known	NA	NA	chr7	-	83910008	83946722	ENSSSCT00000053705	5	2034	ENSSSCG00000034829	lincRNA
56024	0	known	NA	NA	chr4	-	58821383	58865511	ENSSSCT00000053713	7	1939	ENSSSCG00000033751	lincRNA
40700	0	known	NA	NA	chr18	-	52135614	52203377	ENSSSCT00000053745	4	367	ENSSSCG00000034431	lincRNA
28209	0	known	NA	NA	chr14	-	88179705	88273474	ENSSSCT00000053770	6	3171	MSTRG.11808	lincRNA
9207	0	known	NA	NA	chr10	-	24956426	24975458	ENSSSCT00000053796	6	1700	ENSSSCG00000032301	lincRNA
136	0	known	NA	NA	chr1	+	2677005	2679627	ENSSSCT00000053976	4	1415	ENSSSCG00000034946	lincRNA
25	0	known	NA	NA	chr1	+	352196	356072	ENSSSCT00000054059	7	1620	ENSSSCG00000033475	lincRNA
77059	0	known	NA	NA	chr7	-	85679666	85715208	ENSSSCT00000054106	4	1167	ENSSSCG00000034247	lincRNA
72992	0	known	NA	NA	chr7	+	10678033	10689037	ENSSSCT00000054158	4	3644	MSTRG.29956	lincRNA
25141	0	known	NA	NA	chr14	-	26806815	27009881	ENSSSCT00000054184	4	1484	MSTRG.10586	lincRNA
87526	0	known	NA	NA	chrX	+	13719535	13849268	ENSSSCT00000054186	4	2420	MSTRG.35834	lincRNA
46861	0	known	NA	NA	chr2	+	98865202	99031502	ENSSSCT00000054254	4	2608	ENSSSCG00000040462	lincRNA
87080	0	known	NA	NA	chr9	+	133654208	133660258	ENSSSCT00000054262	4	2606	ENSSSCG00000033930	lincRNA
46805	0	known	NA	NA	chr2	+	95824295	95866305	ENSSSCT00000054370	5	595	ENSSSCG00000038476	lincRNA
87827	0	known	NA	NA	chrX	+	32219917	32331456	ENSSSCT00000054446	11	2664	MSTRG.35948	lincRNA
73420	0	known	NA	NA	chr7	-	21173453	21183389	ENSSSCT00000054465	6	5423	MSTRG.30211	lincRNA
31663	0	known	NA	NA	chr15	-	63211607	63368797	ENSSSCT00000054503	4	551	ENSSSCG00000033320	lincRNA
8464	0	known	NA	NA	chr10	-	11007229	11313802	ENSSSCT00000054610	7	2531	MSTRG.3614	lincRNA
40421	0	known	NA	NA	chr18	+	45975574	45981836	ENSSSCT00000054677	4	5148	ENSSSCG00000033943	lincRNA
56275	0	known	NA	NA	chr4	+	67844514	67847924	ENSSSCT00000054682	5	681	MSTRG.23189	lincRNA
78757	0	known	NA	NA	chr8	-	8565900	8586045	ENSSSCT00000054683	4	1472	MSTRG.32290	lincRNA
27021	0	known	NA	NA	chr14	-	56459354	56511246	ENSSSCT00000054955	8	1922	ENSSSCG00000032590	lincRNA
78957	0	known	NA	NA	chr8	+	16475829	16498477	ENSSSCT00000055122	4	3429	ENSSSCG00000037282	lincRNA
85830	0	known	NA	NA	chr9	+	96415473	96463177	ENSSSCT00000055159	5	531	MSTRG.35095	lincRNA
62781	0	known	NA	NA	chr5	-	65318233	65331050	ENSSSCT00000055207	4	821	ENSSSCG00000034889	lincRNA
25139	0	known	NA	NA	chr14	+	26611666	26621357	ENSSSCT00000055228	6	3002	ENSSSCG00000040330	lincRNA
38308	0	known	NA	NA	chr17	+	53705212	54557486	ENSSSCT00000055418	7	3618	MSTRG.16101	lincRNA
36332	0	known	NA	NA	chr17	-	8959711	8962539	ENSSSCT00000055564	4	311	ENSSSCG00000038695	lincRNA
64521	0	known	NA	NA	chr6	+	7661357	7846787	ENSSSCT00000055972	4	794	MSTRG.26487	lincRNA
36044	0	known	NA	NA	chr16	+	75621410	75644555	ENSSSCT00000056083	4	882	ENSSSCG00000033070	lincRNA
12405	0	known	NA	NA	chr11	-	60378058	60409823	ENSSSCT00000056207	4	1761	ENSSSCG00000038699	lincRNA
19628	0	known	NA	NA	chr13	+	52175665	52263769	ENSSSCT00000056244	4	664	ENSSSCG00000036165	lincRNA
12164	0	known	NA	NA	chr11	+	38626494	39222332	ENSSSCT00000056391	5	2758	MSTRG.5262	lincRNA
87720	0	known	NA	NA	chrX	+	21287472	21377459	ENSSSCT00000056405	4	861	ENSSSCG00000032104	lincRNA
87101	0	known	NA	NA	chr9	+	135001576	135002855	ENSSSCT00000056429	4	590	MSTRG.35666	lincRNA
35637	0	known	NA	NA	chr16	-	58719879	59407274	ENSSSCT00000056437	4	4317	ENSSSCG00000036719	lincRNA
54688	0	known	NA	NA	chr4	+	2008915	2012666	ENSSSCT00000056517	4	2533	ENSSSCG00000032079	lincRNA
10758	0	known	NA	NA	chr10	-	64194825	64200487	ENSSSCT00000056553	4	1351	ENSSSCG00000038601	lincRNA
47605	0	known	NA	NA	chr2	+	133340409	133419728	ENSSSCT00000056706	4	864	ENSSSCG00000034342	lincRNA
46832	0	known	NA	NA	chr2	+	96297437	96434978	ENSSSCT00000056775	4	1814	MSTRG.19174	lincRNA
53258	0	known	NA	NA	chr3	-	97418218	97566627	ENSSSCT00000057013	6	3268	MSTRG.21947	lincRNA
55780	0	known	NA	NA	chr4	-	43972838	44090927	ENSSSCT00000057142	4	611	ENSSSCG00000035526	lincRNA
58875	0	known	NA	NA	chr4	-	117112379	117268915	ENSSSCT00000057218	4	2784	MSTRG.24170	lincRNA
72990	0	known	NA	NA	chr7	-	10448501	10453759	ENSSSCT00000057220	4	1931	MSTRG.29957	lincRNA
135	0	known	NA	NA	chr1	+	2608627	2613747	ENSSSCT00000057225	5	1086	ENSSSCG00000036759	lincRNA
29418	0	known	NA	NA	chr14	-	118157260	118629484	ENSSSCT00000057420	12	1605	MSTRG.12320	lincRNA
78464	0	known	NA	NA	chr8	+	527532	532400	ENSSSCT00000057445	4	1502	ENSSSCG00000034251	lincRNA
73421	0	known	NA	NA	chr7	-	21173453	21183389	ENSSSCT00000057520	5	5137	MSTRG.30211	lincRNA
15643	0	known	NA	NA	chr12	-	41501986	41505636	ENSSSCT00000057567	4	1095	ENSSSCG00000038687	lincRNA
40420	0	known	NA	NA	chr18	+	45954184	45981843	ENSSSCT00000057750	5	3688	ENSSSCG00000033943	lincRNA
79645	0	known	NA	NA	chr8	-	43301784	43389841	ENSSSCT00000058037	4	642	ENSSSCG00000037230	lincRNA
54161	0	known	NA	NA	chr3	-	124011485	124147604	ENSSSCT00000058055	4	4813	ENSSSCG00000040277	lincRNA
28114	0	known	NA	NA	chr14	-	84556712	84793399	ENSSSCT00000058490	4	788	MSTRG.11764	lincRNA
46863	0	known	NA	NA	chr2	-	99884949	100444468	ENSSSCT00000058562	5	5355	MSTRG.19187	lincRNA
78230	0	known	NA	NA	chr7	+	118716940	118749135	ENSSSCT00000058679	5	2557	ENSSSCG00000040662	lincRNA
72555	0	known	NA	NA	chr6	+	169363465	169408717	ENSSSCT00000058718	4	5885	ENSSSCG00000033628	lincRNA
9677	0	known	NA	NA	chr10	-	38241969	38299938	ENSSSCT00000058794	4	1422	ENSSSCG00000032101	lincRNA
70402	0	known	NA	NA	chr6	+	100275793	100288065	ENSSSCT00000058797	4	2922	ENSSSCG00000031587	lincRNA
90555	0	known	NA	NA	chrY	-	7797524	7820118	ENSSSCT00000059046	4	2262	MSTRG.37066	lincRNA
23441	0	known	NA	NA	chr13	-	179508931	179562929	ENSSSCT00000059094	8	1090	ENSSSCG00000038495	lincRNA
87078	0	known	NA	NA	chr9	+	133527371	133559892	ENSSSCT00000059159	4	1783	MSTRG.35646	lincRNA
21608	0	known	NA	NA	chr13	-	120073923	120091416	ENSSSCT00000059246	4	850	ENSSSCG00000037596	lincRNA
39910	0	known	NA	NA	chr18	+	27856577	28014521	ENSSSCT00000059256	4	345	ENSSSCG00000035981	lincRNA
77717	0	known	NA	NA	chr7	-	99468560	99494406	ENSSSCT00000059372	4	644	ENSSSCG00000035396	lincRNA
87100	0	known	NA	NA	chr9	+	134999255	135006940	ENSSSCT00000059380	10	1689	MSTRG.35666	lincRNA
22042	0	known	NA	NA	chr13	-	131129559	131134676	ENSSSCT00000059401	7	1206	ENSSSCG00000034990	lincRNA
51683	0	known	NA	NA	chr3	-	50474168	50495558	ENSSSCT00000059428	4	1462	ENSSSCG00000036710	lincRNA
34325	0	known	NA	NA	chr16	+	6170630	6223645	ENSSSCT00000059556	4	1151	MSTRG.14313	lincRNA
80314	0	known	NA	NA	chr8	-	71491306	71499725	ENSSSCT00000059583	6	1039	ENSSSCG00000031708	lincRNA
73422	0	known	NA	NA	chr7	-	21173453	21183389	ENSSSCT00000059587	5	5123	MSTRG.30211	lincRNA
86885	0	known	NA	NA	chr9	+	129335939	129363763	ENSSSCT00000059597	4	766	ENSSSCG00000040610	lincRNA
4146	0	known	NA	NA	chr1	-	137801653	137827081	ENSSSCT00000059679	4	1126	ENSSSCG00000039118	lincRNA
64349	0	known	NA	NA	chr6	-	3433377	3435745	ENSSSCT00000059713	4	770	MSTRG.26380	lincRNA
73128	0	known	NA	NA	chr7	+	14264736	14633357	ENSSSCT00000059722	6	6111	ENSSSCG00000037166	lincRNA
54170	0	known	NA	NA	chr3	-	124736030	124745986	ENSSSCT00000059753	4	2916	ENSSSCG00000036761	lincRNA
87272	0	known	NA	NA	chrX	-	3104444	3239711	ENSSSCT00000059768	4	1004	ENSSSCG00000037996	lincRNA
59618	0	known	NA	NA	chr5	-	3405618	3436174	ENSSSCT00000059769	4	1649	MSTRG.24460	lincRNA
83577	0	known	NA	NA	chr9	-	29035163	29088753	ENSSSCT00000059834	5	843	ENSSSCG00000039906	lincRNA
323	0	known	NA	NA	chr1	-	8168887	8178575	ENSSSCT00000059927	4	940	ENSSSCG00000035342	lincRNA
33037	0	known	NA	NA	chr15	+	107416220	107434421	ENSSSCT00000060319	4	794	ENSSSCG00000040137	lincRNA
13900	0	known	NA	NA	chr12	-	16445936	16477917	ENSSSCT00000060379	8	5175	ENSSSCG00000031841	lincRNA
46387	0	known	NA	NA	chr2	+	83262737	83425150	ENSSSCT00000060458	4	1809	MSTRG.18990	lincRNA
4377	0	known	NA	NA	chr1	+	146279643	146315740	ENSSSCT00000060511	4	675	ENSSSCG00000039717	lincRNA
140	0	known	NA	NA	chr1	-	2777467	2782990	ENSSSCT00000060513	4	3469	ENSSSCG00000036448	lincRNA
79121	0	known	NA	NA	chr8	+	28328962	28431393	ENSSSCT00000060528	5	1760	ENSSSCG00000035159	lincRNA
8465	0	known	NA	NA	chr10	-	11009040	11313886	ENSSSCT00000060605	7	3208	MSTRG.3614	lincRNA
61762	0	known	NA	NA	chr5	-	41172539	41320586	ENSSSCT00000060645	4	4362	MSTRG.25260	lincRNA
39756	0	known	NA	NA	chr18	-	20141472	20149094	ENSSSCT00000061011	5	2466	ENSSSCG00000036149	lincRNA
23490	0	known	NA	NA	chr13	-	181322438	181928001	ENSSSCT00000061093	4	1590	MSTRG.9898	lincRNA
25140	0	known	NA	NA	chr14	-	26793994	27009881	ENSSSCT00000061177	4	1172	MSTRG.10586	lincRNA
79646	0	known	NA	NA	chr8	-	43301784	43525690	ENSSSCT00000061406	4	1204	ENSSSCG00000037230	lincRNA
11473	0	known	NA	NA	chr11	-	10463672	10575390	ENSSSCT00000061435	6	2360	MSTRG.4945	lincRNA
78229	0	known	NA	NA	chr7	+	118716776	118746214	ENSSSCT00000061525	5	3567	ENSSSCG00000040662	lincRNA
40783	0	known	NA	NA	chr18	+	54431140	54470801	ENSSSCT00000061547	4	1716	MSTRG.17127	lincRNA
17653	0	known	NA	NA	chr13	+	12789980	12913826	ENSSSCT00000061673	4	2633	ENSSSCG00000038210	lincRNA
40699	0	known	NA	NA	chr18	-	52016357	52024892	ENSSSCT00000061728	5	2509	ENSSSCG00000031164	lincRNA
34382	0	known	NA	NA	chr16	-	17978557	17982517	ENSSSCT00000061838	5	975	MSTRG.14370	lincRNA
32235	0	known	NA	NA	chr15	-	79542426	79600042	ENSSSCT00000061998	5	2243	ENSSSCG00000031434	lincRNA
20781	0	known	NA	NA	chr13	+	88215539	88365668	ENSSSCT00000062050	5	2938	ENSSSCG00000034422	lincRNA
50221	0	known	NA	NA	chr3	-	24513403	24520855	ENSSSCT00000062085	4	733	MSTRG.20702	lincRNA
55421	0	known	NA	NA	chr4	+	34440317	34460644	ENSSSCT00000062152	4	1825	ENSSSCG00000039382	lincRNA
71149	0	known	NA	NA	chr6	-	134898578	135056872	ENSSSCT00000062170	5	758	MSTRG.29143	lincRNA
64432	0	known	NA	NA	chr6	+	4660531	4668003	ENSSSCT00000062310	4	4887	ENSSSCG00000040925	lincRNA
4543	0	known	NA	NA	chr1	+	159022355	159093304	ENSSSCT00000062385	4	1149	MSTRG.1917	lincRNA
57358	0	known	NA	NA	chr4	+	93664692	93676153	ENSSSCT00000062444	4	5513	MSTRG.23572	lincRNA
9415	0	known	NA	NA	chr10	-	28904324	28994671	ENSSSCT00000062510	6	1061	MSTRG.4043	lincRNA
54336	0	known	NA	NA	chr3	+	127890721	127944756	ENSSSCT00000062548	5	5076	ENSSSCG00000031948	lincRNA
56344	0	known	NA	NA	chr4	-	69958889	69974965	ENSSSCT00000062694	4	2554	ENSSSCG00000040677	lincRNA
10879	0	known	NA	NA	chr10	+	66741325	66971746	ENSSSCT00000062744	9	2449	ENSSSCG00000036117	lincRNA
30139	0	known	NA	NA	chr14	+	139119942	139370367	ENSSSCT00000062751	4	1913	ENSSSCG00000036631	lincRNA
72569	0	known	NA	NA	chr6	-	169884461	169999618	ENSSSCT00000062826	6	2120	MSTRG.29779	lincRNA
16970	0	known	NA	NA	chr12	+	56896838	56915518	ENSSSCT00000063152	4	1082	MSTRG.7138	lincRNA
11245	0	known	NA	NA	chr11	-	5317557	5333839	ENSSSCT00000063168	4	1236	ENSSSCG00000033434	lincRNA
4279	0	known	NA	NA	chr1	+	143627202	143631234	ENSSSCT00000063177	4	2832	ENSSSCG00000038208	lincRNA
77295	0	known	NA	NA	chr7	-	92407506	92412117	ENSSSCT00000063347	4	485	ENSSSCG00000034839	lincRNA
13228	0	known	NA	NA	chr12	+	4535650	4593526	ENSSSCT00000063435	4	1615	ENSSSCG00000033293	lincRNA
87742	0	known	NA	NA	chrX	-	23449534	23506826	ENSSSCT00000063607	4	692	ENSSSCG00000035137	lincRNA
4085	0	known	NA	NA	chr1	+	135887824	136014632	ENSSSCT00000063776	5	5453	MSTRG.1755	lincRNA
53259	0	known	NA	NA	chr3	-	97418218	97567709	ENSSSCT00000063905	6	2828	MSTRG.21947	lincRNA
76309	0	known	NA	NA	chr7	+	73861910	73911853	ENSSSCT00000064079	4	4862	ENSSSCG00000032058	lincRNA
90009	0	known	NA	NA	chrX	+	112058421	112103410	ENSSSCT00000064117	4	3201	MSTRG.36844	lincRNA
5440	0	known	NA	NA	chr1	+	187762655	187952751	ENSSSCT00000064312	4	1142	ENSSSCG00000033445	lincRNA
33564	0	known	NA	NA	chr15	-	123222761	123234915	ENSSSCT00000064381	4	567	ENSSSCG00000033661	lincRNA
12165	0	known	NA	NA	chr11	+	38774470	39126333	ENSSSCT00000064424	5	1512	MSTRG.5263	lincRNA
71147	0	known	NA	NA	chr6	-	134829131	135056872	ENSSSCT00000064429	4	4517	MSTRG.29143	lincRNA
84705	0	known	NA	NA	chr9	-	55006008	55071508	ENSSSCT00000064541	5	856	MSTRG.34658	lincRNA
30138	0	known	NA	NA	chr14	+	139115259	139370367	ENSSSCT00000064750	4	1958	ENSSSCG00000036631	lincRNA
34381	0	known	NA	NA	chr16	-	17978551	17983966	ENSSSCT00000064785	4	2327	MSTRG.14370	lincRNA
51684	0	known	NA	NA	chr3	-	50474168	50657462	ENSSSCT00000064818	4	1938	ENSSSCG00000036710	lincRNA
86956	0	known	NA	NA	chr9	+	130915700	130919520	ENSSSCT00000064854	4	2819	MSTRG.35600	lincRNA
12126	0	known	NA	NA	chr11	+	26723008	26935650	ENSSSCT00000064911	4	1061	ENSSSCG00000036916	lincRNA
19827	0	known	NA	NA	chr13	+	61955128	61969856	ENSSSCT00000064913	4	469	ENSSSCG00000035295	lincRNA
31319	0	known	NA	NA	chr15	+	48796960	48835517	ENSSSCT00000064915	4	4312	ENSSSCG00000040467	lincRNA
9719	0	known	NA	NA	chr10	-	38949315	38970334	ENSSSCT00000065132	4	1973	MSTRG.4202	lincRNA
10878	0	known	NA	NA	chr10	+	66741291	66971746	ENSSSCT00000065146	8	2434	ENSSSCG00000036117	lincRNA
77007	0	known	NA	NA	chr7	+	81682254	81888144	ENSSSCT00000065253	4	3261	MSTRG.31568	lincRNA
17301	0	known	NA	NA	chr12	+	61545330	61552371	ENSSSCT00000065517	5	3605	MSTRG.7281	lincRNA
72554	0	known	NA	NA	chr6	+	169221554	169402455	ENSSSCT00000065534	4	1060	ENSSSCG00000033628	lincRNA
70989	0	known	NA	NA	chr6	-	125368572	125493965	ENSSSCT00000065623	5	3028	ENSSSCG00000038382	lincRNA
78089	0	known	NA	NA	chr7	+	114965386	115031820	ENSSSCT00000065663	16	6326	ENSSSCG00000038851	lincRNA
47497	0	known	NA	NA	chr2	-	127279958	127522152	ENSSSCT00000065694	4	1319	ENSSSCG00000040936	lincRNA
83576	0	known	NA	NA	chr9	-	29035134	29088804	ENSSSCT00000065868	4	843	ENSSSCG00000039906	lincRNA
86280	0	known	NA	NA	chr9	+	111652683	112551233	ENSSSCT00000065923	4	1205	MSTRG.35295	lincRNA
78955	0	known	NA	NA	chr8	+	15482806	15987814	ENSSSCT00000066008	5	1195	ENSSSCG00000031198	lincRNA
14727	0	known	NA	NA	chr12	-	23982233	23984582	ENSSSCT00000066044	4	1257	ENSSSCG00000035536	lincRNA
72182	0	known	NA	NA	chr6	+	164027878	164034439	ENSSSCT00000066168	4	2513	ENSSSCG00000035459	lincRNA
81005	0	known	NA	NA	chr8	+	97432154	97450700	ENSSSCT00000066266	4	1707	ENSSSCG00000034939	lincRNA
51682	0	known	NA	NA	chr3	-	50474168	50490010	ENSSSCT00000066350	4	1527	ENSSSCG00000036710	lincRNA
1	u	novel	0.108103	-0.065536	chr1	+	1	3466	MSTRG.1.1	3	1405	MSTRG.1	NA
229	u	novel	0.0121932	-0.0004096	chr1	.	5552274	5552828	MSTRG.100.1	1	555	MSTRG.100	NA
23752	i	novel	0.125565	-0.0643072	chr13	-	196802631	196810081	MSTRG.10001.1	1	7451	MSTRG.10001	NA
23760	o	novel	0.387379	-0.053248	chr13	-	197015763	197085914	MSTRG.10005.1	2	2548	MSTRG.10005	NA
23772	o	novel	0.0220644	-0.014336	chr13	-	197078048	197085912	MSTRG.10005.10	3	2674	MSTRG.10005	NA
23773	o	novel	0.0131576	-0.0208896	chr13	-	197079564	197085911	MSTRG.10005.11	2	785	MSTRG.10005	NA
23774	o	novel	0.198989	-0.086016	chr13	-	197082179	197085916	MSTRG.10005.12	2	3453	MSTRG.10005	NA
23771	j	novel	0.0610493	-0.0106496	chr13	-	197071350	197087849	MSTRG.10005.9	2	906	MSTRG.10005	NA
23768	i	novel	0.023393	-0.147456	chr13	+	197050746	197051198	MSTRG.10006.1	1	453	MSTRG.10006	NA
23769	i	novel	0.0544994	-0.008192	chr13	+	197052721	197054001	MSTRG.10007.1	1	1281	MSTRG.10007	NA
23770	i	novel	0.0476064	-0.106496	chr13	+	197065645	197067256	MSTRG.10008.1	1	1612	MSTRG.10008	NA
23775	i	novel	0.127688	-0.0028672	chr13	+	197087998	197091506	MSTRG.10009.1	1	3509	MSTRG.10009	NA
2260	i	novel	0.00313419	-0.0004096	chr1	.	83196592	83196876	MSTRG.1001.1	1	285	MSTRG.1001	NA
23819	o	novel	0.115432	-0.0147456	chr13	-	197718692	197739189	MSTRG.10012.1	2	15559	MSTRG.10012	NA
23820	o	novel	0.0353646	-0.012288	chr13	-	197718694	197733390	MSTRG.10012.3	2	11341	MSTRG.10012	NA
23782	i	novel	0.014434	-0.004096	chr13	+	197143096	197143740	MSTRG.10014.1	1	645	MSTRG.10014	NA
23802	i	novel	0.057766	-0.0565248	chr13	-	197249654	197255900	MSTRG.10018.1	2	4901	MSTRG.10018	NA
23803	i	novel	0.00771518	-0.0241664	chr13	-	197252648	197256498	MSTRG.10019.1	2	870	MSTRG.10019	NA
23804	i	novel	0.241632	-0.01024	chr13	+	197256587	197269906	MSTRG.10020.1	2	1241	MSTRG.10020	NA
23805	i	novel	0.0208059	-0.02048	chr13	-	197257489	197306474	MSTRG.10021.1	2	727	MSTRG.10021	NA
23807	i	novel	0.126017	-0.0131072	chr13	-	197268783	197281257	MSTRG.10023.1	2	11503	MSTRG.10023	NA
23808	i	novel	0.042878	-0.086016	chr13	-	197281331	197286957	MSTRG.10024.1	2	2054	MSTRG.10024	NA
23809	i	novel	0.0401038	-0.114688	chr13	+	197296410	197299451	MSTRG.10025.1	2	1740	MSTRG.10025	NA
23825	j	novel	0.085258	-0.077824	chr13	+	197985339	197998280	MSTRG.10027.1	4	525	MSTRG.10027	NA
23826	j	novel	0.0395169	-0.077824	chr13	+	197985737	197998280	MSTRG.10027.3	4	642	MSTRG.10027	NA
23849	i	novel	0.405324	-0.0606208	chr13	+	198397564	198409002	MSTRG.10030.1	1	11439	MSTRG.10030	NA
23851	i	novel	0.0846901	-0.028672	chr13	+	198433104	198434137	MSTRG.10031.1	1	1034	MSTRG.10031	NA
23852	i	novel	0.0168007	-0.028672	chr13	+	198464353	198467503	MSTRG.10032.1	1	3151	MSTRG.10032	NA
2271	u	novel	0.00691594	-0.0004096	chr1	.	84314726	84314931	MSTRG.1004.1	1	206	MSTRG.1004	NA
23888	i	novel	0.00902813	-0.073728	chr13	.	200511738	200512131	MSTRG.10040.1	1	394	MSTRG.10040	NA
23889	i	novel	0.0831674	-0.0090112	chr13	.	200616589	200617022	MSTRG.10041.1	1	434	MSTRG.10041	NA
23917	i	novel	0.200659	-0.0217088	chr13	+	200916496	200922147	MSTRG.10044.1	2	4415	MSTRG.10044	NA
23918	i	novel	0.154024	-0.069632	chr13	-	200922213	200924178	MSTRG.10045.1	2	1874	MSTRG.10045	NA
23911	u	novel	0.0552683	-0.036864	chr13	.	200859492	200861315	MSTRG.10048.1	1	1824	MSTRG.10048	NA
23952	u	novel	0.0663491	-0.0004096	chr13	.	201607124	201607326	MSTRG.10049.1	1	203	MSTRG.10049	NA
23934	i	novel	0.0675192	-0.0057344	chr13	-	201018355	201021944	MSTRG.10051.1	1	3590	MSTRG.10051	NA
23935	i	novel	0.0211516	-0.0565248	chr13	-	201023110	201023378	MSTRG.10052.1	1	269	MSTRG.10052	NA
23936	i	novel	0.159044	-0.0118784	chr13	-	201029018	201036601	MSTRG.10053.1	1	7584	MSTRG.10053	NA
23941	i	novel	0.344078	-0.0094208	chr13	-	201071464	201103045	MSTRG.10054.1	1	31582	MSTRG.10054	NA
23944	u	novel	0.00865428	-0.196608	chr13	.	201162082	201162900	MSTRG.10055.1	1	819	MSTRG.10055	NA
23959	i	novel	0.0267417	-0.0811008	chr13	.	202008321	202008798	MSTRG.10057.1	1	478	MSTRG.10057	NA
23961	i	novel	0.0462032	-0.014336	chr13	.	202019759	202020772	MSTRG.10059.1	1	1014	MSTRG.10059	NA
23962	i	novel	0.00889248	-0.0045056	chr13	.	202024611	202025541	MSTRG.10060.1	1	931	MSTRG.10060	NA
23964	i	novel	0.20987	-0.0466944	chr13	.	202051444	202059345	MSTRG.10061.1	1	7902	MSTRG.10061	NA
23965	i	novel	0.0047168	-0.0004096	chr13	.	202060778	202061258	MSTRG.10062.1	1	481	MSTRG.10062	NA
23966	i	novel	0.0190477	-0.475136	chr13	+	202061652	202071278	MSTRG.10063.1	2	1303	MSTRG.10063	NA
23968	i	novel	0.0057445	-0.0004096	chr13	.	202075519	202075868	MSTRG.10065.1	1	350	MSTRG.10065	NA
23969	i	novel	0.0115478	-0.0253952	chr13	.	202092022	202092394	MSTRG.10066.1	1	373	MSTRG.10066	NA
23970	i	novel	0.0879868	-0.053248	chr13	.	202093072	202093893	MSTRG.10067.1	1	822	MSTRG.10067	NA
23972	i	novel	0.0518299	-0.004096	chr13	.	202110924	202112918	MSTRG.10069.1	1	1995	MSTRG.10069	NA
2278	u	novel	0.119357	-0.036864	chr1	.	84865200	84865416	MSTRG.1007.1	1	217	MSTRG.1007	NA
23973	i	novel	0.104609	-0.0446464	chr13	.	202117228	202124813	MSTRG.10070.1	1	7586	MSTRG.10070	NA
23974	i	novel	0.224498	-0.004096	chr13	.	202125919	202128721	MSTRG.10071.1	1	2803	MSTRG.10071	NA
23997	u	novel	0.12581	-0.0004096	chr13	.	202983867	202984570	MSTRG.10075.1	1	704	MSTRG.10075	NA
2279	u	novel	0.0124073	-0.0004096	chr1	.	84885540	84885751	MSTRG.1008.1	1	212	MSTRG.1008	NA
23984	i	novel	0.0417676	-0.008192	chr13	+	202804432	202806550	MSTRG.10080.1	1	2119	MSTRG.10080	NA
23985	i	novel	0.0364129	-0.0049152	chr13	+	202835312	202838218	MSTRG.10081.1	1	2907	MSTRG.10081	NA
23986	x	novel	0.0913764	-0.0311296	chr13	+	202851736	202890331	MSTRG.10082.1	3	10100	MSTRG.10082	NA
23988	i	novel	0.0913764	-0.0311296	chr13	+	202879954	202890331	MSTRG.10082.2	2	9599	MSTRG.10082	NA
23989	i	novel	0.0913764	-0.04096	chr13	+	202880613	202891846	MSTRG.10082.3	2	8780	MSTRG.10082	NA
23987	i	novel	0.103342	-0.012288	chr13	-	202879946	202891846	MSTRG.10083.1	2	9437	MSTRG.10083	NA
23990	i	novel	0.0157541	-0.380928	chr13	-	202891951	202894171	MSTRG.10084.1	1	2221	MSTRG.10084	NA
24007	i	novel	0.110169	-0.0458752	chr13	+	203243063	203249896	MSTRG.10087.1	1	6834	MSTRG.10087	NA
24008	i	novel	0.0455743	-0.0626688	chr13	.	203257145	203258305	MSTRG.10088.1	1	1161	MSTRG.10088	NA
24009	i	novel	0.0215222	-0.0012288	chr13	-	203261683	203263329	MSTRG.10089.1	1	1647	MSTRG.10089	NA
2281	u	novel	0.0243407	-0.0139264	chr1	.	85183535	85183940	MSTRG.1009.1	1	406	MSTRG.1009	NA
24010	i	novel	0.0272744	-0.0086016	chr13	-	203263812	203273545	MSTRG.10090.1	2	1502	MSTRG.10090	NA
24011	i	novel	0.0695972	-0.057344	chr13	+	203276509	203325306	MSTRG.10091.1	2	962	MSTRG.10091	NA
24014	i	novel	0.417954	-0.0290816	chr13	.	203331618	203334836	MSTRG.10093.1	1	3219	MSTRG.10093	NA
24021	i	novel	0.0632058	-0.0004096	chr13	.	203892132	203892338	MSTRG.10096.1	1	207	MSTRG.10096	NA
24022	u	novel	0.095859	-0.0487424	chr13	.	204487464	204487698	MSTRG.10097.1	1	235	MSTRG.10097	NA
24024	i	novel	0.24465	-0.073728	chr13	-	204624476	204625208	MSTRG.10099.1	1	733	MSTRG.10099	NA
230	u	novel	0.071538	-0.08192	chr1	.	5559451	5560446	MSTRG.101.1	1	996	MSTRG.101	NA
24025	i	novel	0.0506336	-0.022528	chr13	+	204630404	204637534	MSTRG.10100.1	2	4396	MSTRG.10100	NA
24033	u	novel	0.0104515	-0.0004096	chr13	.	204844699	204845099	MSTRG.10102.1	1	401	MSTRG.10102	NA
24054	u	novel	0.0241551	-0.0421888	chr13	.	205216112	205216411	MSTRG.10106.1	1	300	MSTRG.10106	NA
24055	u	novel	0.0808842	-0.0417792	chr13	.	205223314	205223626	MSTRG.10107.1	1	313	MSTRG.10107	NA
24056	u	novel	0.371524	-0.0262144	chr13	.	205229608	205230755	MSTRG.10108.1	1	1148	MSTRG.10108	NA
2283	u	novel	0.0132917	-0.0004096	chr1	.	85738065	85738385	MSTRG.1011.1	1	321	MSTRG.1011	NA
24066	i	novel	0.110484	-0.0692224	chr13	-	205577042	205583365	MSTRG.10114.1	2	4522	MSTRG.10114	NA
24078	i	novel	0.0610432	-0.0004096	chr13	+	205815233	205816107	MSTRG.10116.1	1	875	MSTRG.10116	NA
24090	i	novel	1.51428e-05	-0.0008192	chr13	.	205951624	205952003	MSTRG.10119.1	1	380	MSTRG.10119	NA
2285	i	novel	0.0557314	-0.08192	chr1	-	85913294	85918099	MSTRG.1012.1	2	1181	MSTRG.1012	NA
24092	u	novel	0.349192	-0.04096	chr13	+	206063208	206074547	MSTRG.10120.1	2	5461	MSTRG.10120	NA
24095	i	novel	0.0240012	-0.06144	chr13	-	206082334	206083821	MSTRG.10122.1	1	1488	MSTRG.10122	NA
24103	i	novel	0.138625	-0.0733184	chr13	-	206150654	206159152	MSTRG.10125.1	2	8225	MSTRG.10125	NA
24111	u	novel	0.078109	-0.0106496	chr13	.	206241740	206242168	MSTRG.10126.1	1	429	MSTRG.10126	NA
24126	i	novel	0.0774737	-0.0004096	chr13	.	206555335	206555677	MSTRG.10131.1	1	343	MSTRG.10131	NA
24127	i	novel	0.33776	-0.0004096	chr13	.	206557234	206559044	MSTRG.10132.1	1	1811	MSTRG.10132	NA
24128	i	novel	0.108678	-0.0438272	chr13	.	206562855	206564347	MSTRG.10133.1	1	1493	MSTRG.10133	NA
24129	i	novel	0.121869	-0.0524288	chr13	.	206566089	206567407	MSTRG.10134.1	1	1319	MSTRG.10134	NA
24131	i	novel	0.1368	-0.0663552	chr13	.	206602762	206603529	MSTRG.10136.1	1	768	MSTRG.10136	NA
24140	i	novel	0.0317832	-0.032768	chr13	.	206678901	206679223	MSTRG.10140.1	1	323	MSTRG.10140	NA
24150	i	novel	0.259728	-0.0581632	chr13	+	206832220	206832978	MSTRG.10143.3	1	759	MSTRG.10143	NA
24148	i	novel	0.390708	-0.063488	chr13	-	206813315	206831798	MSTRG.10145.1	1	18484	MSTRG.10145	NA
24149	i	novel	0.06449	-0.0540672	chr13	+	206814090	206816467	MSTRG.10146.1	2	1927	MSTRG.10146	NA
24153	i	novel	0.0897291	-0.0278528	chr13	+	206862651	206864560	MSTRG.10147.1	1	1910	MSTRG.10147	NA
24155	i	novel	0.101678	-0.0372736	chr13	.	206869236	206870616	MSTRG.10148.1	1	1381	MSTRG.10148	NA
24156	i	novel	0.0330617	-0.0004096	chr13	.	206872115	206872737	MSTRG.10149.1	1	623	MSTRG.10149	NA
24157	i	novel	0.382106	-0.063488	chr13	.	206873346	206875982	MSTRG.10150.1	1	2637	MSTRG.10150	NA
24159	i	novel	0.183184	-0.024576	chr13	.	206900501	206901546	MSTRG.10152.1	1	1046	MSTRG.10152	NA
24163	i	novel	0.175506	-0.0663552	chr13	.	206950514	206952869	MSTRG.10155.1	1	2356	MSTRG.10155	NA
24164	i	novel	0.0346056	-0.0569344	chr13	.	206956323	206957285	MSTRG.10156.1	1	963	MSTRG.10156	NA
24166	i	novel	0.00822195	-0.0356352	chr13	.	206968001	206968233	MSTRG.10157.1	1	233	MSTRG.10157	NA
24167	i	novel	0.0232912	-0.114688	chr13	.	206989609	206989969	MSTRG.10158.1	1	361	MSTRG.10158	NA
2294	o	novel	0.139643	-0.12288	chr1	-	86416302	86419571	MSTRG.1016.1	2	3185	MSTRG.1016	NA
24169	i	novel	0.0300104	-0.0004096	chr13	.	207000108	207002028	MSTRG.10160.1	1	1921	MSTRG.10160	NA
24171	x	novel	0.048265	-0.038912	chr13	-	207030890	207042738	MSTRG.10162.1	4	693	MSTRG.10162	NA
24173	u	novel	0.0251445	-0.0290816	chr13	-	207040428	207042831	MSTRG.10162.2	2	528	MSTRG.10162	NA
24190	u	novel	0.00897988	-0.0647168	chr13	.	207205017	207205384	MSTRG.10168.1	1	368	MSTRG.10168	NA
2296	i	novel	0.247307	-0.028672	chr1	+	86426056	86432519	MSTRG.1017.1	2	5712	MSTRG.1017	NA
24222	j	novel	0.180017	-0.134349	chr13	-	207473208	207484301	MSTRG.10172.1	4	3710	MSTRG.10172	NA
24227	x	novel	0.19369	-0.0606208	chr13	+	207494106	207494458	MSTRG.10174.1	2	302	MSTRG.10174	NA
24228	x	novel	0.194775	-0.0606208	chr13	+	207494106	207494458	MSTRG.10174.2	2	302	MSTRG.10174	NA
24229	x	novel	0.177712	-0.0466944	chr13	+	207494110	207494458	MSTRG.10174.3	2	247	MSTRG.10174	NA
24241	u	novel	0.174662	-0.120013	chr13	.	207618780	207618998	MSTRG.10177.1	1	219	MSTRG.10177	NA
24238	i	novel	0.0859876	-0.036864	chr13	+	207562210	207567568	MSTRG.10179.1	1	5359	MSTRG.10179	NA
2297	i	novel	0.0864778	-0.028672	chr1	+	86449964	86451268	MSTRG.1018.1	1	1305	MSTRG.1018	NA
24239	i	novel	0.166385	-0.0397312	chr13	.	207568384	207569080	MSTRG.10180.1	1	697	MSTRG.10180	NA
24240	i	novel	0.0143492	-0.135168	chr13	.	207578946	207579293	MSTRG.10181.1	1	348	MSTRG.10181	NA
24242	u	novel	0.102089	-0.0385024	chr13	-	207670628	207676628	MSTRG.10183.1	2	2461	MSTRG.10183	NA
2298	i	novel	0.116062	-0.0004096	chr1	+	86453617	86462818	MSTRG.1019.1	2	7073	MSTRG.1019	NA
24285	u	novel	0.0165645	-0.0004096	chr14	+	26503	27257	MSTRG.10192.1	1	755	MSTRG.10192	NA
24286	x	novel	0.126288	-0.0045056	chr14	-	220937	248512	MSTRG.10197.1	2	5189	MSTRG.10197	NA
24291	i	novel	0.0890749	-0.0319488	chr14	-	227714	243168	MSTRG.10199.1	1	15455	MSTRG.10199	NA
231	u	novel	0.0259462	-0.0004096	chr1	.	5573300	5574441	MSTRG.102.1	1	1142	MSTRG.102	NA
2299	u	novel	0.0170288	-0.049152	chr1	.	86496447	86496691	MSTRG.1020.1	1	245	MSTRG.1020	NA
24292	i	novel	0.272505	-0.0290816	chr14	+	227738	243153	MSTRG.10200.1	2	12391	MSTRG.10200	NA
24294	x	novel	0.126016	-0.0028672	chr14	-	250808	273044	MSTRG.10201.1	2	5618	MSTRG.10201	NA
24295	i	novel	0.242406	-0.053248	chr14	-	251206	257104	MSTRG.10201.2	2	5662	MSTRG.10201	NA
24296	i	novel	0.0631151	-0.0004096	chr14	+	251670	258693	MSTRG.10202.1	2	4650	MSTRG.10202	NA
24298	u	novel	0.0465791	-0.26624	chr14	.	297230	297551	MSTRG.10203.1	1	322	MSTRG.10203	NA
24299	u	novel	0.0066632	-0.073728	chr14	.	298189	298997	MSTRG.10204.1	1	809	MSTRG.10204	NA
24318	i	novel	0.0351473	-0.06144	chr14	.	938186	940827	MSTRG.10212.1	1	2642	MSTRG.10212	NA
24325	i	novel	0.00569158	-0.0004096	chr14	.	1074557	1074776	MSTRG.10214.1	1	220	MSTRG.10214	NA
24333	u	novel	0.00465583	-0.0004096	chr14	.	1972274	1972531	MSTRG.10215.1	1	258	MSTRG.10215	NA
24334	u	novel	0.115243	-0.065536	chr14	.	1976365	1979045	MSTRG.10216.1	1	2681	MSTRG.10216	NA
24335	u	novel	0.167065	-0.049152	chr14	-	1979949	1987886	MSTRG.10217.1	1	7938	MSTRG.10217	NA
24349	i	novel	0.0659794	-0.0192512	chr14	+	2421614	2429468	MSTRG.10222.1	1	7855	MSTRG.10222	NA
24352	i	novel	0.151084	-0.0012288	chr14	+	2443041	2458118	MSTRG.10223.1	1	15078	MSTRG.10223	NA
24353	i	novel	0.048752	-0.0073728	chr14	+	2458176	2465629	MSTRG.10224.1	2	7434	MSTRG.10224	NA
24356	i	novel	0.103707	-0.069632	chr14	-	2491639	2518246	MSTRG.10225.1	2	4905	MSTRG.10225	NA
24360	i	novel	0.0750251	-0.024576	chr14	.	2829665	2830106	MSTRG.10227.1	1	442	MSTRG.10227	NA
24361	i	novel	0.0383873	-0.131072	chr14	.	2913476	2915947	MSTRG.10228.1	1	2472	MSTRG.10228	NA
24362	i	novel	0.0438205	-0.0638976	chr14	.	2917605	2918080	MSTRG.10229.1	1	476	MSTRG.10229	NA
2312	i	novel	0.0414036	-0.04096	chr1	-	86969284	86971541	MSTRG.1023.1	2	1356	MSTRG.1023	NA
24363	i	novel	0.313662	-0.0339968	chr14	+	2928112	2941413	MSTRG.10230.1	3	7809	MSTRG.10230	NA
24364	i	novel	0.414291	-0.0159744	chr14	-	2932212	3022259	MSTRG.10231.1	2	7038	MSTRG.10231	NA
24373	i	novel	0.154049	-0.0118784	chr14	-	3001471	3022313	MSTRG.10231.2	2	18949	MSTRG.10231	NA
24374	i	novel	0.154049	-0.012288	chr14	-	3001485	3011537	MSTRG.10231.3	2	9859	MSTRG.10231	NA
24365	i	novel	0.270962	-0.024576	chr14	-	2957994	2967733	MSTRG.10232.1	1	9740	MSTRG.10232	NA
24366	i	novel	0.0767806	-0.018432	chr14	+	2960430	2965839	MSTRG.10233.1	1	5410	MSTRG.10233	NA
24367	i	novel	0.113512	-0.0253952	chr14	+	2971175	2980195	MSTRG.10234.1	1	9021	MSTRG.10234	NA
24368	i	novel	0.225474	-0.0770048	chr14	-	2972252	2980195	MSTRG.10235.1	1	7944	MSTRG.10235	NA
24369	i	novel	0.0726514	-0.0335872	chr14	+	2983328	2984830	MSTRG.10236.1	1	1503	MSTRG.10236	NA
24371	i	novel	0.151905	-0.034816	chr14	+	2996355	3001335	MSTRG.10238.1	1	4981	MSTRG.10238	NA
24372	i	novel	0.177493	-0.0344064	chr14	+	3001471	3018133	MSTRG.10239.1	3	12929	MSTRG.10239	NA
24380	u	novel	0.00828193	-0.0110592	chr14	.	3772758	3772985	MSTRG.10243.1	1	228	MSTRG.10243	NA
24381	u	novel	0.00626251	-0.0004096	chr14	.	3780010	3780276	MSTRG.10244.1	1	267	MSTRG.10244	NA
24382	u	novel	0.0249018	-0.014336	chr14	.	3859861	3861198	MSTRG.10245.1	1	1338	MSTRG.10245	NA
24383	u	novel	0.0182185	-0.0503808	chr14	.	3861725	3862763	MSTRG.10246.1	1	1039	MSTRG.10246	NA
24384	u	novel	0.0595739	-0.073728	chr14	.	3872198	3874031	MSTRG.10247.1	1	1834	MSTRG.10247	NA
24385	u	novel	0.333004	-0.0360448	chr14	.	3879470	3880161	MSTRG.10248.1	1	692	MSTRG.10248	NA
24386	u	novel	0.183465	-0.094208	chr14	.	3881486	3889574	MSTRG.10249.1	1	8089	MSTRG.10249	NA
2323	i	novel	0.0121287	-0.0004096	chr1	.	87301078	87301371	MSTRG.1025.1	1	294	MSTRG.1025	NA
24387	u	novel	0.0514866	-0.0004096	chr14	-	3903424	4013655	MSTRG.10250.1	8	2003	MSTRG.10250	NA
24388	u	novel	0.0567868	-0.0671744	chr14	-	4015655	4050237	MSTRG.10251.1	5	5442	MSTRG.10251	NA
24389	u	novel	0.33906	-0.0671744	chr14	-	4015700	4050222	MSTRG.10251.2	6	5478	MSTRG.10251	NA
24390	u	novel	0.065566	-0.0200704	chr14	+	4015717	4019759	MSTRG.10252.1	1	4043	MSTRG.10252	NA
24402	i	novel	0.029743	-0.065536	chr14	.	4366042	4366439	MSTRG.10257.1	1	398	MSTRG.10257	NA
24403	i	novel	0.257814	-0.0516096	chr14	+	4401819	4403831	MSTRG.10258.1	1	2013	MSTRG.10258	NA
24411	i	novel	0.162471	-0.024576	chr14	-	6191799	6209769	MSTRG.10261.1	2	6223	MSTRG.10261	NA
24412	i	novel	0.0597443	-0.04096	chr14	-	6198096	6202493	MSTRG.10261.2	2	2917	MSTRG.10261	NA
24413	i	novel	0.0346695	-0.057344	chr14	-	6204188	6209479	MSTRG.10262.1	2	5247	MSTRG.10262	NA
24414	i	novel	0.450271	-0.004096	chr14	-	6211377	6218866	MSTRG.10263.1	2	4332	MSTRG.10263	NA
24415	i	novel	0.271761	-0.004096	chr14	-	6212244	6224598	MSTRG.10263.2	2	10569	MSTRG.10263	NA
24416	i	novel	0.0641883	-0.024576	chr14	-	6233023	6234953	MSTRG.10264.1	1	1931	MSTRG.10264	NA
24420	x	novel	0.24907	-0.0004096	chr14	-	6294302	6322501	MSTRG.10266.1	2	229	MSTRG.10266	NA
2325	i	novel	0.0381954	-0.0004096	chr1	.	87308639	87309022	MSTRG.1027.1	1	384	MSTRG.1027	NA
24426	x	novel	0.221775	-0.0741376	chr14	-	6351598	6362641	MSTRG.10270.1	2	2420	MSTRG.10270	NA
24435	u	novel	0.0593004	-0.012288	chr14	.	6432737	6434675	MSTRG.10273.1	1	1939	MSTRG.10273	NA
24436	u	novel	0.0254942	-0.0106496	chr14	.	6437019	6438827	MSTRG.10274.1	1	1809	MSTRG.10274	NA
24450	x	novel	0.0115396	-0.012288	chr14	-	6538928	6645702	MSTRG.10278.1	2	297	MSTRG.10278	NA
2326	i	novel	0.0198885	-0.0004096	chr1	.	87314924	87315268	MSTRG.1028.1	1	345	MSTRG.1028	NA
24457	i	novel	0.189313	-0.014336	chr14	+	6663915	6666036	MSTRG.10282.1	2	1807	MSTRG.10282	NA
24463	i	novel	0.0152856	-0.0004096	chr14	+	6720003	6721978	MSTRG.10283.1	2	1559	MSTRG.10283	NA
24464	i	novel	0.0125722	-0.0004096	chr14	+	6730917	6735119	MSTRG.10284.1	2	1836	MSTRG.10284	NA
24465	i	novel	0.271801	-0.200704	chr14	-	6775774	6778458	MSTRG.10285.1	1	2685	MSTRG.10285	NA
2327	i	novel	0.0362579	-0.004096	chr1	.	87316794	87318028	MSTRG.1029.1	1	1235	MSTRG.1029	NA
24486	o	novel	0.060079	-0.028672	chr14	-	7217694	7268908	MSTRG.10295.1	2	1671	MSTRG.10295	NA
24496	i	novel	0.0131319	-0.0933888	chr14	+	7261699	7262488	MSTRG.10298.1	1	790	MSTRG.10298	NA
24497	i	novel	0.0584704	-0.077824	chr14	+	7266798	7268912	MSTRG.10299.1	1	2115	MSTRG.10299	NA
232	u	novel	0.0115123	-0.0004096	chr1	.	5576292	5576725	MSTRG.103.1	1	434	MSTRG.103	NA
2328	u	novel	0.0584457	-0.0892928	chr1	.	87610947	87611188	MSTRG.1030.1	1	242	MSTRG.1030	NA
24501	i	novel	0.0719105	-0.0221184	chr14	-	7319815	7333928	MSTRG.10300.1	2	10594	MSTRG.10300	NA
24502	i	novel	0.0267554	-0.028672	chr14	.	7337919	7341056	MSTRG.10301.1	1	3138	MSTRG.10301	NA
24504	u	novel	0.170878	-0.0671744	chr14	+	7359620	7371923	MSTRG.10302.1	2	8998	MSTRG.10302	NA
24505	u	novel	0.13113	-0.0516096	chr14	-	7362386	7371918	MSTRG.10303.1	2	5168	MSTRG.10303	NA
24506	u	novel	0.125202	-0.057344	chr14	-	7362390	7371575	MSTRG.10303.2	2	9161	MSTRG.10303	NA
24507	u	novel	0.176188	-0.0479232	chr14	-	7363757	7371926	MSTRG.10303.3	2	3800	MSTRG.10303	NA
24508	u	novel	0.0640725	-0.0516096	chr14	-	7364767	7371918	MSTRG.10303.4	3	2698	MSTRG.10303	NA
24509	u	novel	0.041937	-0.0606208	chr14	-	7365681	7371876	MSTRG.10303.5	2	5888	MSTRG.10303	NA
24510	u	novel	0.00858908	-0.0004096	chr14	.	7372597	7373324	MSTRG.10304.1	1	728	MSTRG.10304	NA
24518	i	novel	0.0761896	-0.086016	chr14	.	7489624	7490095	MSTRG.10308.1	1	472	MSTRG.10308	NA
24528	u	novel	0.0273683	-0.049152	chr14	.	7716023	7717899	MSTRG.10311.1	1	1877	MSTRG.10311	NA
24529	u	novel	0.0696761	-0.0004096	chr14	.	7753666	7753924	MSTRG.10312.1	1	259	MSTRG.10312	NA
24531	u	novel	0.0108687	-0.172032	chr14	.	7800606	7801036	MSTRG.10314.1	1	431	MSTRG.10314	NA
24538	u	novel	0.129583	-0.053248	chr14	-	7974052	8005534	MSTRG.10316.1	2	3511	MSTRG.10316	NA
24541	u	novel	0.0297779	-0.0049152	chr14	-	8005695	8044850	MSTRG.10318.1	2	1407	MSTRG.10318	NA
24544	u	novel	0.34008	-0.06144	chr14	+	8020415	8103080	MSTRG.10320.1	2	3487	MSTRG.10320	NA
24545	u	novel	0.118961	-0.012288	chr14	-	8032113	8058698	MSTRG.10321.1	2	2306	MSTRG.10321	NA
24546	u	novel	0.0515762	-0.0004096	chr14	-	8035856	8076907	MSTRG.10322.1	2	1480	MSTRG.10322	NA
24547	u	novel	0.048178	-0.0110592	chr14	-	8058772	8063565	MSTRG.10323.1	1	4794	MSTRG.10323	NA
24548	u	novel	0.0744191	-0.0086016	chr14	+	8063623	8068763	MSTRG.10324.1	2	3181	MSTRG.10324	NA
24549	u	novel	0.0593851	-0.06144	chr14	-	8066018	8072908	MSTRG.10325.1	2	6603	MSTRG.10325	NA
24550	u	novel	0.107945	-0.045056	chr14	-	8079628	8090570	MSTRG.10326.1	2	6196	MSTRG.10326	NA
24551	u	novel	0.0396166	-0.0004096	chr14	+	8103207	8104801	MSTRG.10327.1	2	1570	MSTRG.10327	NA
24552	u	novel	0.0681646	-0.008192	chr14	-	8104913	8112919	MSTRG.10328.1	1	8007	MSTRG.10328	NA
24553	u	novel	0.0847752	-0.049152	chr14	.	8116524	8118226	MSTRG.10329.1	1	1703	MSTRG.10329	NA
24554	u	novel	0.114835	-0.0335872	chr14	-	8138488	8153096	MSTRG.10330.1	2	9126	MSTRG.10330	NA
24596	u	novel	0.214846	-0.065536	chr14	.	10104243	10104542	MSTRG.10334.1	1	300	MSTRG.10334	NA
24613	u	novel	0.166249	-0.02048	chr14	-	10304065	10305637	MSTRG.10335.1	1	1573	MSTRG.10335	NA
24614	u	novel	0.00434311	-0.0004096	chr14	-	10305104	10305550	MSTRG.10335.2	2	411	MSTRG.10335	NA
24571	u	novel	0.0687744	-0.02048	chr14	-	9204732	9206212	MSTRG.10338.1	1	1481	MSTRG.10338	NA
24572	o	novel	0.155085	-0.03072	chr14	+	9246670	9324266	MSTRG.10339.1	2	3756	MSTRG.10339	NA
2319	i	novel	0.0157789	-0.04096	chr1	+	87125350	87129277	MSTRG.1034.1	2	2146	MSTRG.1034	NA
24573	u	novel	0.18123	-0.0344064	chr14	-	9251411	9254127	MSTRG.10340.1	2	1808	MSTRG.10340	NA
24575	i	novel	0.150815	-0.0200704	chr14	-	9298086	9306111	MSTRG.10341.1	2	7457	MSTRG.10341	NA
24576	i	novel	0.0779091	-0.0360448	chr14	-	9306803	9307231	MSTRG.10342.1	1	429	MSTRG.10342	NA
24578	i	novel	0.0107062	-0.0004096	chr14	-	9332140	9332674	MSTRG.10343.1	1	535	MSTRG.10343	NA
24579	i	novel	0.0747378	-0.0282624	chr14	-	9332927	9334686	MSTRG.10344.1	1	1760	MSTRG.10344	NA
24580	i	novel	0.0240998	-0.065536	chr14	-	9419421	9420963	MSTRG.10345.1	1	1543	MSTRG.10345	NA
24581	i	novel	0.0585755	-0.032768	chr14	-	9424007	9427423	MSTRG.10346.1	1	3417	MSTRG.10346	NA
24584	x	novel	0.0603911	-0.053248	chr14	+	9448091	9455197	MSTRG.10348.1	1	7107	MSTRG.10348	NA
2321	i	novel	0.0315749	-0.0229376	chr1	+	87182146	87188382	MSTRG.1035.1	2	4049	MSTRG.1035	NA
24590	i	novel	0.0553014	-0.024576	chr14	-	9507930	9517299	MSTRG.10350.1	2	5423	MSTRG.10350	NA
24607	i	novel	0.0726861	-0.094208	chr14	-	10208647	10216921	MSTRG.10353.1	1	8275	MSTRG.10353	NA
24611	i	novel	0.0964693	-0.0376832	chr14	-	10236176	10238449	MSTRG.10354.1	1	2274	MSTRG.10354	NA
24612	i	novel	0.0229208	-0.0012288	chr14	-	10278784	10281732	MSTRG.10355.1	2	2065	MSTRG.10355	NA
24621	u	novel	0.0895477	-0.006144	chr14	.	10372356	10372605	MSTRG.10356.1	1	250	MSTRG.10356	NA
24620	i	novel	0.0255324	-0.04096	chr14	-	10331931	10336488	MSTRG.10358.1	1	4558	MSTRG.10358	NA
2333	u	novel	0.0315668	-0.0004096	chr1	.	88591498	88591786	MSTRG.1036.1	1	289	MSTRG.1036	NA
24629	i	novel	0.294808	-0.0364544	chr14	-	10480940	10486593	MSTRG.10361.2	2	5629	MSTRG.10361	NA
24638	u	novel	0.171912	-0.0299008	chr14	.	11015100	11016056	MSTRG.10363.1	1	957	MSTRG.10363	NA
24639	u	novel	0.0425079	-0.0004096	chr14	.	11022372	11022897	MSTRG.10364.1	1	526	MSTRG.10364	NA
24681	x	novel	0.138856	-0.0282624	chr14	+	11615639	11617598	MSTRG.10378.1	2	1925	MSTRG.10378	NA
2336	u	novel	0.152164	-0.126976	chr1	.	89560543	89561019	MSTRG.1038.1	1	477	MSTRG.1038	NA
24702	i	novel	0.0411134	-0.0622592	chr14	+	12154713	12156593	MSTRG.10384.1	1	1881	MSTRG.10384	NA
2337	u	novel	0.0160249	-0.04096	chr1	.	89624835	89625104	MSTRG.1039.1	1	270	MSTRG.1039	NA
24722	i	novel	0.00695251	-0.0004096	chr14	.	12565290	12565511	MSTRG.10390.1	1	222	MSTRG.10390	NA
24736	i	novel	0.355339	-0.016384	chr14	-	12717145	12738798	MSTRG.10394.1	2	18482	MSTRG.10394	NA
24737	i	novel	0.0347383	-0.045056	chr14	-	12744101	12750290	MSTRG.10395.1	1	6190	MSTRG.10395	NA
24739	i	novel	0.0449584	-0.0196608	chr14	-	12828464	12831771	MSTRG.10397.1	1	3308	MSTRG.10397	NA
24741	u	novel	0.113267	-0.053248	chr14	-	12887592	12895350	MSTRG.10398.1	1	7759	MSTRG.10398	NA
233	u	novel	0.0103404	-0.0004096	chr1	.	5583543	5583836	MSTRG.104.1	1	294	MSTRG.104	NA
24747	i	novel	0.158729	-0.0004096	chr14	+	13057843	13069917	MSTRG.10401.1	1	12075	MSTRG.10401	NA
24773	i	novel	0.0542263	-0.057344	chr14	.	13943155	13943539	MSTRG.10403.1	1	385	MSTRG.10403	NA
24756	i	novel	0.117369	-0.12288	chr14	.	13336012	13336445	MSTRG.10405.1	1	434	MSTRG.10405	NA
24759	i	novel	0.0650822	-0.0323584	chr14	+	13388003	13398961	MSTRG.10406.1	2	9798	MSTRG.10406	NA
2346	u	novel	0.0662622	-0.0004096	chr1	.	90117039	90117750	MSTRG.1041.1	1	712	MSTRG.1041	NA
24763	o	novel	0.255383	-0.026624	chr14	-	13676401	13886344	MSTRG.10410.1	2	3905	MSTRG.10410	NA
24764	i	novel	0.0420332	-0.024576	chr14	.	13680449	13682618	MSTRG.10411.1	1	2170	MSTRG.10411	NA
24765	i	novel	0.0446188	-0.0139264	chr14	.	13693251	13693925	MSTRG.10412.1	1	675	MSTRG.10412	NA
24793	u	novel	0.0237782	-0.0004096	chr14	.	14529589	14529852	MSTRG.10418.1	1	264	MSTRG.10418	NA
24794	u	novel	0.054629	-0.02048	chr14	.	14536126	14536418	MSTRG.10419.1	1	293	MSTRG.10419	NA
2347	u	novel	0.0258166	-0.0118784	chr1	.	90119844	90122612	MSTRG.1042.1	1	2769	MSTRG.1042	NA
24781	u	novel	0.258091	-0.045056	chr14	.	14277167	14279415	MSTRG.10423.1	1	2249	MSTRG.10423	NA
24782	u	novel	0.00338966	-0.0004096	chr14	.	14283820	14284048	MSTRG.10424.1	1	229	MSTRG.10424	NA
24783	u	novel	0.0630102	-0.008192	chr14	-	14289684	14296538	MSTRG.10425.1	1	6855	MSTRG.10425	NA
24784	u	novel	0.0445794	-0.0630784	chr14	.	14297869	14299822	MSTRG.10426.1	1	1954	MSTRG.10426	NA
24785	u	novel	0.155621	-0.004096	chr14	.	14301420	14317520	MSTRG.10427.1	1	16101	MSTRG.10427	NA
24786	u	novel	0.0317275	-0.0004096	chr14	.	14318079	14318458	MSTRG.10428.1	1	380	MSTRG.10428	NA
24787	u	novel	0.0313814	-0.274432	chr14	.	14318797	14319980	MSTRG.10429.1	1	1184	MSTRG.10429	NA
2348	u	novel	0.0561282	-0.067584	chr1	.	90125515	90128659	MSTRG.1043.1	1	3145	MSTRG.1043	NA
24788	u	novel	0.0755225	-0.004096	chr14	.	14325479	14326954	MSTRG.10430.1	1	1476	MSTRG.10430	NA
24789	x	novel	0.0894647	-0.0012288	chr14	+	14338425	14389875	MSTRG.10431.1	2	27859	MSTRG.10431	NA
24790	u	novel	0.0885401	-0.107725	chr14	+	14365671	14368079	MSTRG.10431.2	2	1852	MSTRG.10431	NA
24803	u	novel	0.0420367	-0.0004096	chr14	.	14781401	14781625	MSTRG.10434.1	1	225	MSTRG.10434	NA
24804	u	novel	0.0152166	-0.0499712	chr14	.	14787421	14787952	MSTRG.10435.1	1	532	MSTRG.10435	NA
24815	x	novel	0.199891	-0.0270336	chr14	-	14889265	14905305	MSTRG.10437.1	2	14814	MSTRG.10437	NA
2349	u	novel	0.0247843	-0.0049152	chr1	.	90132011	90132703	MSTRG.1044.1	1	693	MSTRG.1044	NA
24862	u	novel	0.0781643	-0.0434176	chr14	.	16459236	16459888	MSTRG.10447.1	1	653	MSTRG.10447	NA
2350	u	novel	0.112286	-0.028672	chr1	.	90134479	90135728	MSTRG.1045.1	1	1250	MSTRG.1045	NA
24866	u	novel	0.371102	-0.0434176	chr14	+	16481566	16486212	MSTRG.10451.1	1	4647	MSTRG.10451	NA
24868	u	novel	0.0608961	-0.053248	chr14	.	16604520	16606627	MSTRG.10453.1	1	2108	MSTRG.10453	NA
24870	u	novel	0.491057	-0.0135168	chr14	.	16620471	16623380	MSTRG.10455.1	1	2910	MSTRG.10455	NA
24871	u	novel	0.0427217	-0.0385024	chr14	.	16632338	16632683	MSTRG.10456.1	1	346	MSTRG.10456	NA
2351	o	novel	0.332431	-0.0733184	chr1	-	90157697	90237463	MSTRG.1046.1	2	3432	MSTRG.1046	NA
24875	u	novel	0.0345353	-0.012288	chr14	-	16693627	16703733	MSTRG.10460.1	3	1150	MSTRG.10460	NA
24882	i	novel	0.0334479	-0.18432	chr14	+	16792662	16830462	MSTRG.10463.1	2	3486	MSTRG.10463	NA
24917	u	novel	0.00808953	-0.002048	chr14	.	18148981	18149272	MSTRG.10464.1	1	292	MSTRG.10464	NA
24886	u	novel	0.0127208	-0.0004096	chr14	.	17533652	17534410	MSTRG.10466.1	1	759	MSTRG.10466	NA
24887	u	novel	0.0105326	-0.0004096	chr14	.	17539571	17539773	MSTRG.10467.1	1	203	MSTRG.10467	NA
24888	u	novel	0.0501829	-0.028672	chr14	.	17545409	17547487	MSTRG.10468.1	1	2079	MSTRG.10468	NA
24889	u	novel	0.0627735	-0.02048	chr14	.	17549803	17550305	MSTRG.10469.1	1	503	MSTRG.10469	NA
24890	o	novel	0.125018	-0.0004096	chr14	-	17564883	17636572	MSTRG.10470.1	2	1204	MSTRG.10470	NA
24892	u	novel	0.0453052	-0.108544	chr14	.	17884006	17886541	MSTRG.10472.1	1	2536	MSTRG.10472	NA
24893	u	novel	0.00609539	-0.0004096	chr14	.	17896291	17896535	MSTRG.10473.1	1	245	MSTRG.10473	NA
24894	u	novel	0.00699038	-0.0172032	chr14	.	17925304	17927888	MSTRG.10474.1	1	2585	MSTRG.10474	NA
24895	u	novel	0.0979532	-0.0004096	chr14	.	17933994	17935515	MSTRG.10475.1	1	1522	MSTRG.10475	NA
24896	u	novel	0.0540358	-0.18432	chr14	.	17936016	17939920	MSTRG.10476.1	1	3905	MSTRG.10476	NA
24897	u	novel	0.0669194	-0.0319488	chr14	.	17945696	17949468	MSTRG.10477.1	1	3773	MSTRG.10477	NA
24898	u	novel	0.0168018	-0.0004096	chr14	.	17950815	17951587	MSTRG.10478.1	1	773	MSTRG.10478	NA
24899	u	novel	0.058769	-0.049152	chr14	.	17955247	17959255	MSTRG.10479.1	1	4009	MSTRG.10479	NA
24901	u	novel	0.112833	-0.0274432	chr14	.	17973914	17983062	MSTRG.10481.1	1	9149	MSTRG.10481	NA
24903	u	novel	0.0730193	-0.012288	chr14	+	17993379	18000744	MSTRG.10483.1	2	6786	MSTRG.10483	NA
24904	u	novel	0.0730847	-0.0135168	chr14	.	18000828	18007181	MSTRG.10484.1	1	6354	MSTRG.10484	NA
24906	u	novel	0.116575	-0.0147456	chr14	.	18020554	18032804	MSTRG.10486.1	1	12251	MSTRG.10486	NA
24907	u	novel	0.048737	-0.0950272	chr14	.	18034785	18037118	MSTRG.10487.1	1	2334	MSTRG.10487	NA
24908	u	novel	0.128781	-0.16384	chr14	.	18044274	18046183	MSTRG.10488.1	1	1910	MSTRG.10488	NA
24909	u	novel	0.0903502	-0.12288	chr14	.	18046481	18046780	MSTRG.10489.1	1	300	MSTRG.10489	NA
24910	u	novel	0.0321764	-0.0151552	chr14	.	18058173	18059962	MSTRG.10490.1	1	1790	MSTRG.10490	NA
24911	u	novel	0.0902148	-0.0786432	chr14	.	18066461	18073449	MSTRG.10491.1	1	6989	MSTRG.10491	NA
24912	u	novel	0.0698517	-0.008192	chr14	.	18077791	18083832	MSTRG.10492.1	1	6042	MSTRG.10492	NA
24913	u	novel	0.0513152	-0.0016384	chr14	.	18085098	18087541	MSTRG.10493.1	1	2444	MSTRG.10493	NA
24914	u	novel	0.0252042	-0.024576	chr14	.	18093230	18096075	MSTRG.10494.1	1	2846	MSTRG.10494	NA
24915	u	novel	0.344597	-0.024576	chr14	.	18100585	18115934	MSTRG.10495.1	1	15350	MSTRG.10495	NA
24916	u	novel	0.209275	-0.0512	chr14	.	18119298	18141314	MSTRG.10496.1	1	22017	MSTRG.10496	NA
24918	u	novel	0.00575993	-0.0004096	chr14	.	19301228	19301574	MSTRG.10497.1	1	347	MSTRG.10497	NA
24919	o	novel	0.0783574	-0.188006	chr14	-	19333481	19824319	MSTRG.10498.1	7	1284	MSTRG.10498	NA
234	u	novel	0.0110148	-0.0004096	chr1	.	5619387	5619590	MSTRG.105.1	1	204	MSTRG.105	NA
2371	i	novel	0.209642	-0.217088	chr1	-	90270545	90276542	MSTRG.1050.1	2	3242	MSTRG.1050	NA
24932	i	novel	0.0647791	-0.0446464	chr14	.	20021424	20023541	MSTRG.10504.1	1	2118	MSTRG.10504	NA
24948	o	novel	0.0518736	-0.02048	chr14	+	20359120	20447378	MSTRG.10508.1	2	13577	MSTRG.10508	NA
24949	x	novel	0.0260036	-0.131072	chr14	-	20388096	20456371	MSTRG.10509.1	3	921	MSTRG.10509	NA
2372	i	novel	0.338323	-0.008192	chr1	+	90270546	90282000	MSTRG.1051.1	1	11455	MSTRG.1051	NA
24954	i	novel	0.0766354	-0.008192	chr14	-	20471979	20481688	MSTRG.10512.1	1	9710	MSTRG.10512	NA
24956	i	novel	0.0427623	-0.16384	chr14	+	20628202	20630729	MSTRG.10514.1	1	2528	MSTRG.10514	NA
24968	x	novel	0.236152	-0.0585728	chr14	+	20690466	20756746	MSTRG.10516.1	2	11981	MSTRG.10516	NA
24969	i	novel	0.364034	-0.055296	chr14	+	20734886	20756746	MSTRG.10516.2	3	8367	MSTRG.10516	NA
2373	i	novel	0.122873	-0.114688	chr1	+	90283161	90290030	MSTRG.1052.1	1	6870	MSTRG.1052	NA
24983	i	novel	0.0321186	-0.057344	chr14	-	21774102	21774899	MSTRG.10521.1	1	798	MSTRG.10521	NA
24985	i	novel	0.107831	-0.0126976	chr14	+	21801267	21806255	MSTRG.10523.1	2	3195	MSTRG.10523	NA
24986	i	novel	0.115118	-0.0294912	chr14	+	21812173	21823906	MSTRG.10524.1	2	4564	MSTRG.10524	NA
24995	i	novel	0.03989	-0.04096	chr14	.	22384093	22384746	MSTRG.10527.1	1	654	MSTRG.10527	NA
24996	i	novel	0.00884136	-0.0004096	chr14	.	22402747	22403282	MSTRG.10528.1	1	536	MSTRG.10528	NA
25005	u	novel	0.12902	-0.110592	chr14	.	22525792	22528262	MSTRG.10532.1	1	2471	MSTRG.10532	NA
25019	i	novel	0.0331015	-0.0544768	chr14	-	22614454	22616394	MSTRG.10537.1	1	1941	MSTRG.10537	NA
25021	i	novel	0.140847	-0.038912	chr14	-	22630253	22631777	MSTRG.10538.1	1	1525	MSTRG.10538	NA
25022	i	novel	0.0802011	-0.008192	chr14	-	22635730	22639088	MSTRG.10539.1	1	3359	MSTRG.10539	NA
2376	i	novel	0.0775906	-0.151552	chr1	.	90429083	90430492	MSTRG.1054.1	1	1410	MSTRG.1054	NA
25032	i	novel	0.374239	-0.045056	chr14	-	22702357	22706049	MSTRG.10541.1	1	3693	MSTRG.10541	NA
25043	i	novel	0.0170021	-0.012288	chr14	.	22791158	22791758	MSTRG.10546.1	1	601	MSTRG.10546	NA
25044	i	novel	0.0229087	-0.024576	chr14	.	22793134	22793397	MSTRG.10547.1	1	264	MSTRG.10547	NA
25045	i	novel	0.0162361	-0.10281	chr14	.	22795814	22796665	MSTRG.10548.1	1	852	MSTRG.10548	NA
2377	i	novel	0.0277734	-0.0106496	chr1	+	90431061	90432215	MSTRG.1055.1	1	1155	MSTRG.1055	NA
25051	u	novel	0.210782	-0.0950272	chr14	+	22889173	22891618	MSTRG.10552.1	1	2446	MSTRG.10552	NA
25058	u	novel	0.22802	-0.0282624	chr14	+	22944760	22955441	MSTRG.10555.1	2	4866	MSTRG.10555	NA
25101	i	novel	0.0215756	-0.0176128	chr14	+	24072547	24073629	MSTRG.10559.1	1	1083	MSTRG.10559	NA
2378	i	novel	0.281787	-0.0364544	chr1	-	90432288	90447627	MSTRG.1056.1	1	15340	MSTRG.1056	NA
25102	i	novel	0.00836286	-0.1024	chr14	-	24150803	24155846	MSTRG.10560.1	2	414	MSTRG.10560	NA
25103	i	novel	0.125914	-0.0110592	chr14	+	24177612	24181243	MSTRG.10561.1	1	3632	MSTRG.10561	NA
25104	i	novel	0.0583893	-0.172032	chr14	+	24218919	24220844	MSTRG.10562.1	1	1926	MSTRG.10562	NA
25075	x	novel	0.0350026	-0.0004096	chr14	+	23325011	23334514	MSTRG.10566.1	2	841	MSTRG.10566	NA
25077	x	novel	0.0717856	-0.008192	chr14	+	23346391	23406496	MSTRG.10568.1	2	1231	MSTRG.10568	NA
25078	i	novel	0.0469776	-0.008192	chr14	+	23346517	23350401	MSTRG.10568.2	2	1189	MSTRG.10568	NA
25079	i	novel	0.0310077	-0.032768	chr14	+	23347102	23350264	MSTRG.10568.3	2	1826	MSTRG.10568	NA
25080	i	novel	0.0361477	-0.032768	chr14	+	23347112	23350424	MSTRG.10568.4	2	1976	MSTRG.10568	NA
2379	i	novel	0.0251838	-0.0004096	chr1	+	90446458	90447059	MSTRG.1057.1	1	602	MSTRG.1057	NA
25089	i	novel	0.236589	-0.034816	chr14	-	23439442	23445648	MSTRG.10571.1	1	6207	MSTRG.10571	NA
25097	i	novel	0.130529	-0.02048	chr14	+	23570972	23573532	MSTRG.10575.1	1	2561	MSTRG.10575	NA
25111	i	novel	0.152303	-0.0294912	chr14	.	24346056	24346595	MSTRG.10577.1	1	540	MSTRG.10577	NA
25112	i	novel	0.03283	-0.0339968	chr14	.	24348457	24349080	MSTRG.10578.1	1	624	MSTRG.10578	NA
2380	i	novel	0.0162472	-0.0004096	chr1	.	90450739	90451479	MSTRG.1058.1	1	741	MSTRG.1058	NA
25114	i	novel	0.0226831	-0.221184	chr14	.	24356310	24357401	MSTRG.10580.1	1	1092	MSTRG.10580	NA
25138	i	novel	0.0086426	-0.0892928	chr14	.	26301278	26301480	MSTRG.10584.1	1	203	MSTRG.10584	NA
25156	u	novel	0.00720387	-0.0004096	chr14	.	27111421	27111696	MSTRG.10585.1	1	276	MSTRG.10585	NA
25151	i	novel	0.168962	-0.02048	chr14	-	26954856	26981679	MSTRG.10586.3	1	26824	MSTRG.10586	NA
25142	i	novel	0.0037224	-0.180224	chr14	.	26877208	26877479	MSTRG.10587.1	1	272	MSTRG.10587	NA
25143	i	novel	0.169374	-0.0323584	chr14	.	26907907	26917895	MSTRG.10588.1	1	9989	MSTRG.10588	NA
25144	i	novel	0.0945334	-0.0376832	chr14	+	26918716	26940311	MSTRG.10589.1	1	21596	MSTRG.10589	NA
2381	i	novel	0.0141389	-0.0028672	chr1	.	90462466	90462801	MSTRG.1059.1	1	336	MSTRG.1059	NA
25146	i	novel	0.22477	-0.0094208	chr14	-	26938792	26949725	MSTRG.10591.1	2	2790	MSTRG.10591	NA
25148	i	novel	0.0759387	-0.06144	chr14	-	26949977	26951693	MSTRG.10593.1	1	1717	MSTRG.10593	NA
25149	i	novel	0.0397953	-0.0339968	chr14	-	26951944	26953742	MSTRG.10594.1	1	1799	MSTRG.10594	NA
25150	i	novel	0.0675986	-0.110592	chr14	.	26954152	26954594	MSTRG.10595.1	1	443	MSTRG.10595	NA
25152	i	novel	0.128874	-0.0126976	chr14	+	26954856	27003219	MSTRG.10596.1	2	20528	MSTRG.10596	NA
25153	x	novel	0.346822	-0.016384	chr14	+	26974239	27018091	MSTRG.10596.2	2	1348	MSTRG.10596	NA
25155	u	novel	0.0408941	-0.0004096	chr14	.	27026852	27027190	MSTRG.10597.1	1	339	MSTRG.10597	NA
25157	u	novel	0.0513771	-0.0626688	chr14	-	27221079	27230691	MSTRG.10598.1	3	859	MSTRG.10598	NA
235	u	novel	0.0121326	-0.0004096	chr1	.	5632649	5632895	MSTRG.106.1	1	247	MSTRG.106	NA
2382	i	novel	0.0627152	-0.004096	chr1	-	90466640	90472738	MSTRG.1060.1	2	3259	MSTRG.1060	NA
25160	i	novel	0.0117019	-0.022528	chr14	+	28134103	28135730	MSTRG.10601.1	2	1338	MSTRG.10601	NA
25161	x	novel	0.101788	-0.0438272	chr14	+	28135825	28145908	MSTRG.10602.1	2	4264	MSTRG.10602	NA
25169	u	novel	1.81459e-05	-0.090112	chr14	.	28247958	28248306	MSTRG.10603.1	1	349	MSTRG.10603	NA
25165	i	novel	0.00687277	-0.0004096	chr14	.	28206916	28207163	MSTRG.10605.1	1	248	MSTRG.10605	NA
25166	i	novel	0.017317	-0.088064	chr14	.	28210291	28211249	MSTRG.10606.1	1	959	MSTRG.10606	NA
25168	i	novel	0.046414	-0.201114	chr14	.	28231769	28232360	MSTRG.10608.1	1	592	MSTRG.10608	NA
2384	i	novel	0.0436477	-0.04096	chr1	-	90521384	90524550	MSTRG.1061.1	1	3167	MSTRG.1061	NA
25176	x	novel	0.0417644	-0.108544	chr14	-	28258981	28259488	MSTRG.10610.1	2	280	MSTRG.10610	NA
25177	x	novel	0.0417644	-0.108544	chr14	-	28258981	28259944	MSTRG.10610.2	2	280	MSTRG.10610	NA
25188	u	novel	0.0505905	-0.0147456	chr14	.	28403706	28405768	MSTRG.10611.1	1	2063	MSTRG.10611	NA
25181	i	novel	0.0563978	-0.028672	chr14	-	28303884	28305183	MSTRG.10613.1	1	1300	MSTRG.10613	NA
25182	i	novel	0.0717664	-0.177766	chr14	+	28305450	28309466	MSTRG.10614.1	2	1441	MSTRG.10614	NA
25183	i	novel	0.143466	-0.0323584	chr14	-	28309564	28331827	MSTRG.10615.1	2	3920	MSTRG.10615	NA
25184	i	novel	0.0706232	-0.0339968	chr14	-	28310374	28313975	MSTRG.10615.2	2	708	MSTRG.10615	NA
25185	i	novel	0.2579	-0.0294912	chr14	-	28331910	28341459	MSTRG.10616.1	2	6455	MSTRG.10616	NA
25195	u	novel	0.131738	-0.0581632	chr14	-	28592926	28606632	MSTRG.10618.1	1	13707	MSTRG.10618	NA
2385	o	novel	0.0294673	-0.094208	chr1	+	90607665	90662016	MSTRG.1062.1	2	3001	MSTRG.1062	NA
25201	i	novel	0.113603	-0.0520192	chr14	-	28707054	28710386	MSTRG.10621.2	1	3333	MSTRG.10621	NA
25209	u	novel	0.0171416	-0.012288	chr14	.	28909011	28909378	MSTRG.10624.1	1	368	MSTRG.10624	NA
25210	u	novel	0.113546	-0.192512	chr14	.	28918138	28918500	MSTRG.10625.1	1	363	MSTRG.10625	NA
25211	u	novel	0.0262362	-0.0004096	chr14	.	28963728	28963954	MSTRG.10626.1	1	227	MSTRG.10626	NA
25212	u	novel	0.0272666	-0.131072	chr14	.	28964988	28965539	MSTRG.10627.1	1	552	MSTRG.10627	NA
25213	u	novel	0.0640751	-0.18432	chr14	.	28979092	28979397	MSTRG.10628.1	1	306	MSTRG.10628	NA
25270	i	novel	0.0506098	-0.237568	chr14	-	29454628	29455663	MSTRG.10630.1	1	1036	MSTRG.10630	NA
25215	u	novel	0.0709728	-0.229376	chr14	.	28996853	28997439	MSTRG.10636.1	1	587	MSTRG.10636	NA
25216	u	novel	0.00437952	-0.090112	chr14	.	29018060	29018332	MSTRG.10637.1	1	273	MSTRG.10637	NA
2387	i	novel	0.1007	-0.077824	chr1	.	90645690	90649197	MSTRG.1064.1	1	3508	MSTRG.1064	NA
25238	i	novel	0.0399338	-0.0806912	chr14	.	29083641	29083936	MSTRG.10640.1	1	296	MSTRG.10640	NA
25239	i	novel	0.0304209	-0.0004096	chr14	.	29084219	29084536	MSTRG.10641.1	1	318	MSTRG.10641	NA
25242	i	novel	0.0214224	-0.0004096	chr14	.	29132870	29133290	MSTRG.10643.1	1	421	MSTRG.10643	NA
25243	i	novel	0.0256081	-0.0004096	chr14	.	29157706	29157981	MSTRG.10644.1	1	276	MSTRG.10644	NA
25252	i	novel	0.0855056	-0.536576	chr14	-	29314599	29314989	MSTRG.10648.1	1	391	MSTRG.10648	NA
2390	i	novel	0.0480898	-0.0241664	chr1	-	90672678	90673433	MSTRG.1065.1	1	756	MSTRG.1065	NA
25259	x	novel	0.00399746	-0.0004096	chr14	-	29347008	29347302	MSTRG.10651.1	1	295	MSTRG.10651	NA
25299	i	novel	0.169818	-0.0212992	chr14	-	29666455	29673046	MSTRG.10659.1	1	6592	MSTRG.10659	NA
25300	i	novel	0.218698	-0.036864	chr14	-	29666975	29673397	MSTRG.10659.2	2	4538	MSTRG.10659	NA
25304	i	novel	0.0647258	-0.0233472	chr14	-	29744618	29749626	MSTRG.10661.1	1	5009	MSTRG.10661	NA
25305	i	novel	0.293449	-0.0446464	chr14	-	29749728	29758133	MSTRG.10662.1	2	8113	MSTRG.10662	NA
25313	i	novel	0.0295191	-0.0253952	chr14	.	29788622	29793138	MSTRG.10665.1	1	4517	MSTRG.10665	NA
25328	o	novel	0.0940788	-0.008192	chr14	+	29961721	29983461	MSTRG.10667.1	2	1402	MSTRG.10667	NA
25332	i	novel	0.0488209	-0.0479232	chr14	+	29963524	29980004	MSTRG.10669.1	2	4586	MSTRG.10669	NA
25334	i	novel	0.0379855	-0.032768	chr14	+	29973627	29977690	MSTRG.10669.2	2	3154	MSTRG.10669	NA
25347	i	novel	0.0598284	-0.036864	chr14	.	30196713	30197760	MSTRG.10673.1	1	1048	MSTRG.10673	NA
25349	i	novel	0.00866639	-0.065536	chr14	+	30222030	30222240	MSTRG.10675.1	1	211	MSTRG.10675	NA
25350	o	novel	0.01746	-0.0004096	chr14	-	30222125	30271519	MSTRG.10676.1	2	407	MSTRG.10676	NA
25373	i	novel	0.0637721	-0.036864	chr14	+	30436471	30443531	MSTRG.10682.1	2	4925	MSTRG.10682	NA
25374	i	novel	0.244014	-0.0086016	chr14	-	30439770	30443130	MSTRG.10683.1	1	3361	MSTRG.10683	NA
25381	u	novel	0.13129	-0.0004096	chr14	.	30548131	30548860	MSTRG.10687.1	1	730	MSTRG.10687	NA
25386	u	novel	0.0125466	-0.0004096	chr14	+	30569223	30569535	MSTRG.10691.1	1	313	MSTRG.10691	NA
25394	i	novel	0.118884	-0.0364544	chr14	-	30604238	30613443	MSTRG.10692.1	2	8012	MSTRG.10692	NA
25395	i	novel	0.116338	-0.0372736	chr14	-	30605944	30629427	MSTRG.10692.2	4	19895	MSTRG.10692	NA
25396	i	novel	0.126765	-0.0647168	chr14	+	30606022	30627172	MSTRG.10693.1	2	20156	MSTRG.10693	NA
25397	i	novel	0.10639	-0.0647168	chr14	+	30610170	30627160	MSTRG.10693.2	2	16017	MSTRG.10693	NA
25398	i	novel	0.30467	-0.0647168	chr14	+	30613186	30640703	MSTRG.10693.3	1	27518	MSTRG.10693	NA
25399	i	novel	0.0864021	-0.0647168	chr14	+	30613521	30626941	MSTRG.10693.4	2	11453	MSTRG.10693	NA
25400	i	novel	0.10639	-0.0647168	chr14	+	30613660	30627155	MSTRG.10693.5	2	12556	MSTRG.10693	NA
25401	i	novel	0.30467	-0.02048	chr14	+	30629480	30640249	MSTRG.10694.1	2	6618	MSTRG.10694	NA
25408	i	novel	0.0254358	-0.0004096	chr14	.	30788948	30789197	MSTRG.10697.1	1	250	MSTRG.10697	NA
25434	u	novel	0.016918	-0.012288	chr14	.	30983519	30983860	MSTRG.10699.1	1	342	MSTRG.10699	NA
236	u	novel	0.048244	-0.0004096	chr1	.	5633409	5633645	MSTRG.107.1	1	237	MSTRG.107	NA
25442	i	novel	0.00277782	-0.0004096	chr14	.	31069026	31069356	MSTRG.10706.1	1	331	MSTRG.10706	NA
25448	i	novel	0.00802626	-0.02048	chr14	.	31176126	31176638	MSTRG.10709.1	1	513	MSTRG.10709	NA
25449	i	novel	0.111982	-0.016384	chr14	.	31177116	31177859	MSTRG.10710.1	1	744	MSTRG.10710	NA
25463	i	novel	0.0473097	-0.012288	chr14	-	31327179	31327970	MSTRG.10716.1	1	792	MSTRG.10716	NA
25468	o	novel	0.0629557	-0.0278528	chr14	-	31339101	31424496	MSTRG.10717.1	2	1168	MSTRG.10717	NA
2443	u	novel	0.105037	-0.0004096	chr1	.	93118709	93118950	MSTRG.1072.1	1	242	MSTRG.1072	NA
25475	x	novel	0.054873	-0.06144	chr14	-	31669033	31687703	MSTRG.10720.1	2	1196	MSTRG.10720	NA
25484	i	novel	0.0461717	-0.077824	chr14	-	31710158	31712171	MSTRG.10722.1	2	1967	MSTRG.10722	NA
25498	i	novel	0.0202077	-0.0626688	chr14	+	31853940	31854488	MSTRG.10726.1	1	549	MSTRG.10726	NA
25503	i	novel	0.148231	-0.0864256	chr14	+	31867655	31869510	MSTRG.10728.1	1	1856	MSTRG.10728	NA
25508	j	novel	0.235365	-0.0172032	chr14	-	31907922	31921493	MSTRG.10731.2	3	10317	MSTRG.10731	NA
25509	i	novel	0.373546	-0.0077824	chr14	+	31917548	31921463	MSTRG.10732.1	1	3916	MSTRG.10732	NA
2426	o	novel	0.019021	-0.0458752	chr1	-	92423047	92424550	MSTRG.1074.1	2	940	MSTRG.1074	NA
2427	o	novel	0.0135332	-0.0458752	chr1	-	92423403	92424540	MSTRG.1074.2	2	847	MSTRG.1074	NA
2429	j	novel	0.0432479	-0.0405504	chr1	-	92423745	92424844	MSTRG.1074.3	3	836	MSTRG.1074	NA
25582	i	novel	0.00347184	-0.0004096	chr14	-	33191476	33191721	MSTRG.10740.1	1	246	MSTRG.10740	NA
25533	i	novel	0.0811825	-0.0417792	chr14	+	32636481	32642366	MSTRG.10743.1	1	5886	MSTRG.10743	NA
25534	i	novel	0.0930313	-0.077824	chr14	.	32642670	32650351	MSTRG.10744.1	1	7682	MSTRG.10744	NA
25536	i	novel	0.0261311	-0.0393216	chr14	-	32651326	32651594	MSTRG.10745.1	1	269	MSTRG.10745	NA
25537	i	novel	0.110224	-0.0417792	chr14	-	32652188	32657811	MSTRG.10746.1	1	5624	MSTRG.10746	NA
25551	i	novel	0.070834	-0.0315392	chr14	-	32681565	32688313	MSTRG.10748.1	2	4555	MSTRG.10748	NA
25552	i	novel	0.0592243	-0.0118784	chr14	+	32685476	32687153	MSTRG.10749.1	1	1678	MSTRG.10749	NA
25553	i	novel	0.0264648	-0.04096	chr14	+	32688488	32691351	MSTRG.10750.1	2	806	MSTRG.10750	NA
25554	i	novel	0.0714983	-0.008192	chr14	+	32718177	32721893	MSTRG.10751.1	2	2984	MSTRG.10751	NA
25556	x	novel	0.138384	-0.036864	chr14	+	32722637	32735309	MSTRG.10752.1	2	9978	MSTRG.10752	NA
25557	x	novel	0.0765681	-0.0069632	chr14	+	32740860	32821751	MSTRG.10753.1	3	14369	MSTRG.10753	NA
25559	i	novel	0.0965509	-0.0069632	chr14	+	32743427	32757591	MSTRG.10753.2	2	13473	MSTRG.10753	NA
25560	x	novel	0.0538789	-0.04096	chr14	+	32761793	32780253	MSTRG.10753.3	2	1235	MSTRG.10753	NA
25573	i	novel	0.014213	-0.0008192	chr14	+	32848742	32848981	MSTRG.10756.1	1	240	MSTRG.10756	NA
25591	i	novel	0.0226351	-0.04096	chr14	.	33323909	33325408	MSTRG.10760.1	1	1500	MSTRG.10760	NA
25600	u	novel	0.00459242	-0.0004096	chr14	.	33900607	33900977	MSTRG.10763.1	1	371	MSTRG.10763	NA
25611	i	novel	0.0349879	-0.02048	chr14	-	34322954	34338979	MSTRG.10766.1	2	5689	MSTRG.10766	NA
2433	i	novel	0.0455599	-0.0004096	chr1	.	92493153	92494182	MSTRG.1077.1	1	1030	MSTRG.1077	NA
25646	i	novel	0.129852	-0.0536576	chr14	.	35436042	35438071	MSTRG.10776.1	1	2030	MSTRG.10776	NA
25658	u	novel	0.340684	-0.0282624	chr14	-	35934087	35940855	MSTRG.10783.1	1	6769	MSTRG.10783	NA
25659	x	novel	0.0995338	-0.028672	chr14	-	36049213	36157848	MSTRG.10784.1	3	7949	MSTRG.10784	NA
25666	i	novel	0.0678511	-0.036864	chr14	-	36079861	36091448	MSTRG.10784.2	3	7701	MSTRG.10784	NA
25668	i	novel	0.0535158	-0.053248	chr14	-	36122396	36147922	MSTRG.10785.1	1	25527	MSTRG.10785	NA
25671	i	novel	0.0308451	-0.0229376	chr14	+	36148191	36157848	MSTRG.10786.1	2	9104	MSTRG.10786	NA
25672	i	novel	0.0767539	-0.045056	chr14	-	36157933	36172786	MSTRG.10787.1	1	14854	MSTRG.10787	NA
25673	i	novel	0.100667	-0.032768	chr14	-	36174855	36193898	MSTRG.10788.1	2	18037	MSTRG.10788	NA
25674	i	novel	0.102059	-0.032768	chr14	-	36177748	36193898	MSTRG.10788.2	1	16151	MSTRG.10788	NA
25675	i	novel	0.112746	-0.0024576	chr14	+	36199118	36207976	MSTRG.10789.1	2	7887	MSTRG.10789	NA
2435	u	novel	0.0340241	-0.004096	chr1	.	92505606	92507660	MSTRG.1079.1	1	2055	MSTRG.1079	NA
25676	i	novel	0.103696	-0.06144	chr14	-	36199143	36207943	MSTRG.10790.1	2	5971	MSTRG.10790	NA
25677	i	novel	0.107004	-0.114688	chr14	-	36200169	36207988	MSTRG.10790.2	2	4989	MSTRG.10790	NA
25678	x	novel	0.0812	-0.0004096	chr14	-	36214881	36286504	MSTRG.10791.1	2	7127	MSTRG.10791	NA
25679	x	novel	0.0819077	-0.0729088	chr14	-	36215464	36292493	MSTRG.10791.2	2	5501	MSTRG.10791	NA
25680	i	novel	0.182338	-0.08192	chr14	+	36230639	36237145	MSTRG.10792.1	2	4979	MSTRG.10792	NA
25681	i	novel	0.0654579	-0.0139264	chr14	+	36248061	36284714	MSTRG.10793.1	2	31518	MSTRG.10793	NA
25682	i	novel	0.0431326	-0.118784	chr14	+	36248644	36265346	MSTRG.10793.2	2	14544	MSTRG.10793	NA
25683	i	novel	0.0651549	-0.118784	chr14	+	36248648	36286930	MSTRG.10793.3	2	32763	MSTRG.10793	NA
25684	i	novel	0.0452461	-0.049152	chr14	-	36292572	36306554	MSTRG.10794.1	2	9315	MSTRG.10794	NA
25685	x	novel	0.0417835	-0.036864	chr14	-	36293624	36372966	MSTRG.10794.2	2	2534	MSTRG.10794	NA
25686	i	novel	0.204994	-0.004096	chr14	-	36373311	36374008	MSTRG.10795.1	1	698	MSTRG.10795	NA
25694	u	novel	0.213301	-0.0299008	chr14	-	37962325	37967739	MSTRG.10797.1	1	5415	MSTRG.10797	NA
25695	u	novel	0.0309464	-0.012288	chr14	.	37977850	37978833	MSTRG.10798.1	1	984	MSTRG.10798	NA
2436	u	novel	0.089152	-0.04096	chr1	.	92518451	92518709	MSTRG.1080.1	1	259	MSTRG.1080	NA
25726	i	novel	0.0239024	-0.0004096	chr14	.	38757383	38757713	MSTRG.10808.1	1	331	MSTRG.10808	NA
2437	u	novel	0.116615	-0.004096	chr1	.	92580956	92581159	MSTRG.1081.1	1	204	MSTRG.1081	NA
25741	o	novel	0.00413601	-0.012288	chr14	-	38857729	38861977	MSTRG.10810.10	3	280	MSTRG.10810	NA
25742	i	novel	0.16163	-0.10281	chr14	+	38858218	38858567	MSTRG.10811.1	1	350	MSTRG.10811	NA
25747	u	novel	0.109572	-0.01024	chr14	.	39196796	39198529	MSTRG.10812.1	1	1734	MSTRG.10812	NA
25751	i	novel	0.0504094	-0.114688	chr14	-	39245550	39248879	MSTRG.10814.1	2	2422	MSTRG.10814	NA
25763	i	novel	0.0687522	-0.06144	chr14	-	39331880	39336767	MSTRG.10818.1	2	4205	MSTRG.10818	NA
25764	i	novel	0.221258	-0.024576	chr14	+	39336814	39340109	MSTRG.10819.1	2	2928	MSTRG.10819	NA
25765	i	novel	0.216021	-0.008192	chr14	+	39336868	39342365	MSTRG.10819.2	2	3412	MSTRG.10819	NA
2447	u	novel	0.0727311	-0.077824	chr1	.	94310769	94312054	MSTRG.1082.1	1	1286	MSTRG.1082	NA
25766	i	novel	0.0116293	-0.0212992	chr14	.	39346072	39347171	MSTRG.10820.1	1	1100	MSTRG.10820	NA
25767	i	novel	0.0674247	-0.024576	chr14	.	39353002	39353695	MSTRG.10821.1	1	694	MSTRG.10821	NA
25770	u	novel	0.00635076	-0.0004096	chr14	.	39540857	39541205	MSTRG.10822.1	1	349	MSTRG.10822	NA
25771	u	novel	0.0731423	-0.0004096	chr14	.	39543123	39543382	MSTRG.10823.1	1	260	MSTRG.10823	NA
25775	o	novel	0.00426177	-0.0004096	chr14	-	39564816	39641915	MSTRG.10825.1	2	235	MSTRG.10825	NA
25776	i	novel	0.0106554	-0.0004096	chr14	-	39573088	39574844	MSTRG.10826.1	2	483	MSTRG.10826	NA
25784	i	novel	0.0154446	-0.057344	chr14	-	39677662	39679671	MSTRG.10829.1	1	2010	MSTRG.10829	NA
25806	o	novel	0.0210559	-0.100762	chr14	+	39886564	39908015	MSTRG.10834.1	2	302	MSTRG.10834	NA
25818	i	novel	0.00664043	-0.0004096	chr14	.	40067355	40067623	MSTRG.10838.1	1	269	MSTRG.10838	NA
25819	i	novel	0.00700443	-0.028672	chr14	.	40117745	40118036	MSTRG.10839.1	1	292	MSTRG.10839	NA
2452	i	novel	0.0496427	-0.0172032	chr1	+	94337776	94352550	MSTRG.1084.1	2	14747	MSTRG.1084	NA
25827	x	novel	0.0280919	-0.012288	chr14	+	40215872	40286648	MSTRG.10847.1	2	735	MSTRG.10847	NA
25842	x	novel	0.160861	-0.0598016	chr14	+	40264355	40286647	MSTRG.10847.2	2	4742	MSTRG.10847	NA
2453	i	novel	0.0911751	-0.053248	chr1	-	94366283	94476703	MSTRG.1085.1	2	2382	MSTRG.1085	NA
25839	u	novel	0.154565	-0.063488	chr14	+	40242750	40258427	MSTRG.10850.1	2	15654	MSTRG.10850	NA
25840	u	novel	0.0631577	-0.063488	chr14	+	40249600	40258578	MSTRG.10850.2	2	5478	MSTRG.10850	NA
25843	o	novel	0.0974049	-0.0004096	chr14	-	40286425	40287396	MSTRG.10851.1	2	224	MSTRG.10851	NA
25862	u	novel	0.0209514	-0.0135168	chr14	.	40446047	40446269	MSTRG.10855.1	1	223	MSTRG.10855	NA
2454	i	novel	0.0218557	-0.0425984	chr1	-	94376339	94424291	MSTRG.1086.1	2	1269	MSTRG.1086	NA
25912	u	novel	0.0173858	-0.0425984	chr14	.	40925896	40926739	MSTRG.10868.1	1	844	MSTRG.10868	NA
2455	i	novel	0.12706	-0.0090112	chr1	+	94376405	94379045	MSTRG.1087.1	2	2597	MSTRG.1087	NA
25889	i	novel	0.117076	-0.1024	chr14	.	40646684	40647842	MSTRG.10872.1	1	1159	MSTRG.10872	NA
25891	u	novel	0.0311243	-0.012288	chr14	.	40661032	40663197	MSTRG.10874.1	1	2166	MSTRG.10874	NA
25892	u	novel	0.377764	-0.0294912	chr14	+	40668171	40696222	MSTRG.10875.1	2	2968	MSTRG.10875	NA
25893	o	novel	0.0616807	-0.08192	chr14	-	40670322	40767557	MSTRG.10876.1	2	7245	MSTRG.10876	NA
25894	u	novel	0.0327659	-0.0438272	chr14	+	40698279	40699887	MSTRG.10877.1	1	1609	MSTRG.10877	NA
25897	x	novel	0.323353	-0.0331776	chr14	+	40718477	40801625	MSTRG.10879.1	2	10086	MSTRG.10879	NA
2456	i	novel	0.183137	-0.0765952	chr1	-	94381701	94422965	MSTRG.1088.1	2	40821	MSTRG.1088	NA
2457	i	novel	0.153245	-0.0229376	chr1	-	94383325	94385214	MSTRG.1088.2	2	1457	MSTRG.1088	NA
25898	i	novel	0.0264762	-0.111821	chr14	+	40722649	40736984	MSTRG.10880.1	2	3575	MSTRG.10880	NA
25899	x	novel	0.0388347	-0.155238	chr14	+	40740569	40755874	MSTRG.10881.1	2	4635	MSTRG.10881	NA
25900	i	novel	0.0299695	-0.016384	chr14	+	40766438	40781729	MSTRG.10882.1	3	9422	MSTRG.10882	NA
25901	i	novel	0.0376369	-0.004096	chr14	-	40787027	40808800	MSTRG.10883.1	2	4501	MSTRG.10883	NA
25902	i	novel	0.0252422	-0.172032	chr14	+	40808866	40813826	MSTRG.10884.1	2	4524	MSTRG.10884	NA
25903	i	novel	0.0422246	-0.0147456	chr14	-	40813187	40818701	MSTRG.10885.1	2	4118	MSTRG.10885	NA
25904	i	novel	0.122877	-0.0004096	chr14	+	40814007	40822000	MSTRG.10886.1	1	7994	MSTRG.10886	NA
2459	i	novel	0.116046	-0.0258048	chr1	+	94445649	94460494	MSTRG.1089.1	2	14775	MSTRG.1089	NA
25945	i	novel	0.190353	-0.0446464	chr14	+	41215011	41221194	MSTRG.10890.1	1	6184	MSTRG.10890	NA
25946	i	novel	0.0110258	-0.0069632	chr14	.	41227718	41228205	MSTRG.10891.1	1	488	MSTRG.10891	NA
239	i	novel	0.0126145	-0.0761856	chr1	.	5705400	5705724	MSTRG.109.1	1	325	MSTRG.109	NA
25973	o	novel	0.0965327	-0.196608	chr14	+	41759067	41774234	MSTRG.10902.1	2	1630	MSTRG.10902	NA
25992	i	novel	0.044356	-0.057344	chr14	+	41971424	41988533	MSTRG.10908.1	2	1064	MSTRG.10908	NA
25994	x	novel	0.0386166	-0.004096	chr14	-	42043012	42075438	MSTRG.10909.1	2	1088	MSTRG.10909	NA
25998	i	novel	0.402842	-0.008192	chr14	+	42063755	42075011	MSTRG.10911.1	2	9851	MSTRG.10911	NA
26018	u	novel	0.0423806	-0.02048	chr14	.	42470471	42472206	MSTRG.10917.1	1	1736	MSTRG.10917	NA
26030	u	novel	0.386647	-0.04096	chr14	+	42995852	43006104	MSTRG.10922.1	1	10253	MSTRG.10922	NA
26031	u	novel	0.371089	-0.0692224	chr14	.	43006950	43016114	MSTRG.10923.1	1	9165	MSTRG.10923	NA
26032	u	novel	0.244572	-0.069632	chr14	.	43016947	43021316	MSTRG.10924.1	1	4370	MSTRG.10924	NA
26033	u	novel	0.0373698	-0.0421888	chr14	.	43022361	43026094	MSTRG.10925.1	1	3734	MSTRG.10925	NA
26034	u	novel	0.165933	-0.045056	chr14	.	43028813	43030318	MSTRG.10926.1	1	1506	MSTRG.10926	NA
26035	u	novel	0.00973775	-0.004096	chr14	.	43034784	43035396	MSTRG.10927.1	1	613	MSTRG.10927	NA
26041	i	novel	0.125268	-0.0053248	chr14	-	43092958	43095221	MSTRG.10929.1	1	2264	MSTRG.10929	NA
26042	i	novel	0.165009	-0.0258048	chr14	-	43116856	43121447	MSTRG.10930.1	1	4592	MSTRG.10930	NA
26065	i	novel	0.160149	-0.018432	chr14	.	44043851	44046109	MSTRG.10936.1	1	2259	MSTRG.10936	NA
26087	i	novel	0.0938879	-0.0098304	chr14	+	44153331	44169340	MSTRG.10940.1	4	3680	MSTRG.10940	NA
26088	i	novel	0.127929	-0.0360448	chr14	+	44162593	44166703	MSTRG.10940.2	3	2179	MSTRG.10940	NA
26089	i	novel	0.376626	-0.0520192	chr14	.	44169472	44185989	MSTRG.10941.1	1	16518	MSTRG.10941	NA
26170	u	novel	0.0554379	-0.0004096	chr14	.	46054254	46055068	MSTRG.10943.1	1	815	MSTRG.10943	NA
26172	j	novel	0.487687	-0.149504	chr14	+	46092023	46202749	MSTRG.10944.2	3	9432	MSTRG.10944	NA
26174	i	novel	0.228683	-0.0200704	chr14	+	46097409	46113569	MSTRG.10944.4	2	7049	MSTRG.10944	NA
26175	i	novel	0.314534	-0.0344064	chr14	-	46104511	46165170	MSTRG.10945.1	1	60660	MSTRG.10945	NA
26176	i	novel	0.243817	-0.0385024	chr14	-	46129901	46161880	MSTRG.10945.2	2	23359	MSTRG.10945	NA
26177	i	novel	0.101951	-0.0503808	chr14	-	46169469	46175179	MSTRG.10946.1	1	5711	MSTRG.10946	NA
26179	i	novel	0.201403	-0.016384	chr14	-	46202787	46216285	MSTRG.10947.1	1	13499	MSTRG.10947	NA
26180	i	novel	0.481756	-0.055296	chr14	.	46216680	46220197	MSTRG.10948.1	1	3518	MSTRG.10948	NA
26181	i	novel	0.00773649	-0.016384	chr14	+	46227620	46227836	MSTRG.10949.1	1	217	MSTRG.10949	NA
26191	o	novel	0.00818222	-0.012288	chr14	+	46383154	46425733	MSTRG.10957.1	2	383	MSTRG.10957	NA
26192	i	novel	0.0474375	-0.04096	chr14	.	46392565	46394176	MSTRG.10958.1	1	1612	MSTRG.10958	NA
26207	i	novel	0.0417755	-0.151142	chr14	-	46425264	46425735	MSTRG.10961.1	1	472	MSTRG.10961	NA
26107	x	novel	0.100125	-0.0671744	chr14	+	45250227	45334837	MSTRG.10963.1	3	1413	MSTRG.10963	NA
26108	u	novel	0.108661	-0.0004096	chr14	+	45253742	45255900	MSTRG.10964.1	1	2159	MSTRG.10964	NA
26109	u	novel	0.0446943	-0.0004096	chr14	.	45266823	45267511	MSTRG.10965.1	1	689	MSTRG.10965	NA
26120	i	novel	0.0971268	-0.0012288	chr14	+	45376946	45380694	MSTRG.10968.1	1	3749	MSTRG.10968	NA
26121	i	novel	0.12943	-0.0200704	chr14	+	45387149	45404869	MSTRG.10969.1	2	17647	MSTRG.10969	NA
26123	o	novel	0.112118	-0.0335872	chr14	-	45452798	45516739	MSTRG.10970.1	2	6748	MSTRG.10970	NA
26125	i	novel	0.196279	-0.0442368	chr14	+	45459492	45483736	MSTRG.10971.1	1	24245	MSTRG.10971	NA
26127	u	novel	0.169791	-0.135168	chr14	+	45493590	45526375	MSTRG.10972.1	2	4792	MSTRG.10972	NA
26128	u	novel	0.0966594	-0.0004096	chr14	+	45530321	45559121	MSTRG.10973.1	2	27990	MSTRG.10973	NA
26129	u	novel	0.219891	-0.0729088	chr14	-	45543897	45595892	MSTRG.10974.1	3	47422	MSTRG.10974	NA
26130	u	novel	0.0256393	-0.0217088	chr14	+	45565619	45606770	MSTRG.10975.1	2	5805	MSTRG.10975	NA
26132	o	novel	0.172663	-0.131482	chr14	+	45675039	45771617	MSTRG.10976.1	3	913	MSTRG.10976	NA
26135	u	novel	0.0312398	-0.131072	chr14	+	45718014	45729759	MSTRG.10976.2	2	5230	MSTRG.10976	NA
26138	u	novel	0.0587927	-0.0110592	chr14	+	45766630	45819833	MSTRG.10976.3	2	15348	MSTRG.10976	NA
26140	u	novel	0.0512179	-0.0110592	chr14	+	45805778	45819677	MSTRG.10976.4	2	12111	MSTRG.10976	NA
26143	u	novel	0.0587983	-0.036864	chr14	+	45820238	45824346	MSTRG.10978.1	1	4109	MSTRG.10978	NA
26145	o	novel	0.386321	-0.075776	chr14	+	45825045	45893994	MSTRG.10979.1	2	68434	MSTRG.10979	NA
26146	u	novel	0.0204186	-0.2048	chr14	+	45835246	45839311	MSTRG.10979.2	2	2924	MSTRG.10979	NA
26149	u	novel	0.0930581	-0.049152	chr14	+	45859102	45879474	MSTRG.10979.4	2	20055	MSTRG.10979	NA
26156	i	novel	0.404047	-0.0323584	chr14	+	45945035	45947177	MSTRG.10981.1	1	2143	MSTRG.10981	NA
26157	i	novel	0.0394952	-0.028672	chr14	.	45961987	45964250	MSTRG.10982.1	1	2264	MSTRG.10982	NA
26160	j	novel	0.0799646	-0.0507904	chr14	+	45967560	45975709	MSTRG.10983.3	5	755	MSTRG.10983	NA
26164	j	novel	0.154887	-0.028672	chr14	+	45995866	46008281	MSTRG.10984.4	3	6052	MSTRG.10984	NA
2494	u	novel	0.0877293	-0.0520192	chr1	.	96291810	96292951	MSTRG.1099.1	1	1142	MSTRG.1099	NA
26246	i	novel	0.161317	-0.04096	chr14	.	46818613	46819315	MSTRG.10993.1	1	703	MSTRG.10993	NA
26247	i	novel	0.149042	-0.049152	chr14	.	46831734	46832877	MSTRG.10994.1	1	1144	MSTRG.10994	NA
26248	i	novel	0.14154	-0.0094208	chr14	.	46833800	46835148	MSTRG.10995.1	1	1349	MSTRG.10995	NA
26249	i	novel	0.0288098	-0.0004096	chr14	-	46838735	46839670	MSTRG.10996.1	1	936	MSTRG.10996	NA
26250	i	novel	0.0409982	-0.155648	chr14	.	46840669	46842211	MSTRG.10997.1	1	1543	MSTRG.10997	NA
26281	i	novel	0.0353319	-0.086016	chr14	.	47155852	47160047	MSTRG.10999.1	1	4196	MSTRG.10999	NA
240	i	novel	0.0311065	-0.0004096	chr1	.	5706255	5706660	MSTRG.110.1	1	406	MSTRG.110	NA
26282	u	novel	0.140563	-0.008192	chr14	.	47167613	47169368	MSTRG.11000.1	1	1756	MSTRG.11000	NA
26283	u	novel	0.128257	-0.0385024	chr14	-	47171151	47185218	MSTRG.11001.1	1	14068	MSTRG.11001	NA
26284	u	novel	0.137002	-0.063488	chr14	-	47185327	47196608	MSTRG.11002.1	2	10072	MSTRG.11002	NA
26287	u	novel	0.128466	-0.08192	chr14	.	47234487	47234804	MSTRG.11004.1	1	318	MSTRG.11004	NA
26251	x	novel	0.109054	-0.126976	chr14	-	46871883	46957969	MSTRG.11005.1	3	2096	MSTRG.11005	NA
26267	i	novel	0.0560197	-0.098304	chr14	-	46889197	46950642	MSTRG.11005.2	2	1905	MSTRG.11005	NA
26274	i	novel	0.10477	-0.0069632	chr14	-	46918271	46957927	MSTRG.11005.3	3	8982	MSTRG.11005	NA
26277	i	novel	0.117857	-0.188416	chr14	-	46933633	46953624	MSTRG.11005.4	2	3244	MSTRG.11005	NA
26260	i	novel	0.180131	-0.262144	chr14	-	46878171	46883721	MSTRG.11007.1	2	4952	MSTRG.11007	NA
26261	i	novel	0.0598534	-0.004096	chr14	-	46881497	46886093	MSTRG.11007.2	2	3902	MSTRG.11007	NA
26262	i	novel	0.0492934	-0.024576	chr14	-	46886168	46927123	MSTRG.11008.1	2	4068	MSTRG.11008	NA
26263	i	novel	0.0234566	-0.145408	chr14	-	46886177	46910633	MSTRG.11008.2	2	1056	MSTRG.11008	NA
26264	i	novel	0.027859	-0.1024	chr14	-	46886211	46900265	MSTRG.11008.3	2	2079	MSTRG.11008	NA
26268	i	novel	0.0565376	-0.024576	chr14	-	46898312	46914380	MSTRG.11008.4	3	4644	MSTRG.11008	NA
26266	i	novel	0.268007	-0.016384	chr14	+	46889197	46923063	MSTRG.11009.1	2	6711	MSTRG.11009	NA
26265	i	novel	0.0837242	-0.06144	chr14	+	46889197	46897930	MSTRG.11009.2	2	7186	MSTRG.11009	NA
26271	i	novel	0.260072	-0.0221184	chr14	+	46906924	46923060	MSTRG.11009.3	2	8528	MSTRG.11009	NA
26272	i	novel	0.271957	-0.0155648	chr14	+	46909653	46923068	MSTRG.11009.4	2	5741	MSTRG.11009	NA
26269	i	novel	0.168224	-0.004096	chr14	+	46898411	46940990	MSTRG.11010.1	2	1968	MSTRG.11010	NA
26270	i	novel	0.032462	-0.004096	chr14	+	46900394	46906447	MSTRG.11011.1	2	5556	MSTRG.11011	NA
26273	i	novel	0.0478319	-0.0249856	chr14	-	46914928	46933518	MSTRG.11012.1	2	4584	MSTRG.11012	NA
26275	i	novel	0.0276908	-0.090112	chr14	+	46927531	46953993	MSTRG.11013.1	2	5707	MSTRG.11013	NA
26276	i	novel	0.157886	-0.090112	chr14	+	46927562	46939001	MSTRG.11013.2	3	9855	MSTRG.11013	NA
26278	i	novel	0.0251421	-0.0118784	chr14	-	46974960	46976929	MSTRG.11014.1	1	1970	MSTRG.11014	NA
26279	i	novel	0.0293033	-0.065536	chr14	-	47008084	47010764	MSTRG.11015.1	2	1288	MSTRG.11015	NA
26289	u	novel	0.163762	-0.135168	chr14	.	47256496	47257615	MSTRG.11017.1	1	1120	MSTRG.11017	NA
2507	x	novel	0.0507122	-0.155238	chr1	+	96465873	96482572	MSTRG.1102.1	2	2747	MSTRG.1102	NA
26295	i	novel	0.0361382	-0.0004096	chr14	.	47294422	47294941	MSTRG.11020.1	1	520	MSTRG.11020	NA
26297	i	novel	0.0631698	-0.0004096	chr14	.	47309925	47310127	MSTRG.11022.1	1	203	MSTRG.11022	NA
26317	i	novel	0.0239928	-0.0004096	chr14	.	47394637	47394881	MSTRG.11027.1	1	245	MSTRG.11027	NA
2508	i	novel	0.167592	-0.032768	chr1	+	96468683	96471803	MSTRG.1103.1	1	3121	MSTRG.1103	NA
26341	u	novel	0.0459273	-0.0856064	chr14	.	47535527	47535905	MSTRG.11031.1	1	379	MSTRG.11031	NA
26354	o	novel	0.171349	-0.0585728	chr14	+	47799745	47811427	MSTRG.11036.1	3	8369	MSTRG.11036	NA
26355	o	novel	0.0623428	-0.028672	chr14	+	47800258	47810398	MSTRG.11036.2	4	4244	MSTRG.11036	NA
26359	o	novel	0.0683586	-0.004096	chr14	+	47803898	47810670	MSTRG.11036.5	2	5121	MSTRG.11036	NA
2510	i	novel	0.0124786	-0.016384	chr1	+	96524921	96525901	MSTRG.1104.1	1	981	MSTRG.1104	NA
26385	i	novel	0.099233	-0.055296	chr14	-	48015761	48021544	MSTRG.11044.1	1	5784	MSTRG.11044	NA
26388	u	novel	0.0614736	-0.0004096	chr14	.	48052200	48052732	MSTRG.11046.1	1	533	MSTRG.11046	NA
2511	x	novel	0.0318841	-0.475136	chr1	+	96542464	96545737	MSTRG.1105.1	2	2894	MSTRG.1105	NA
26435	i	novel	0.126341	-0.036864	chr14	.	48483339	48484040	MSTRG.11052.1	1	702	MSTRG.11052	NA
26400	i	novel	0.0444719	-0.192922	chr14	.	48275344	48275622	MSTRG.11054.1	1	279	MSTRG.11054	NA
26401	i	novel	0.0228188	-0.04096	chr14	.	48275918	48276335	MSTRG.11055.1	1	418	MSTRG.11055	NA
26418	i	novel	0.364453	-0.045056	chr14	+	48360743	48365082	MSTRG.11057.1	1	4340	MSTRG.11057	NA
26423	i	novel	0.0416304	-0.016384	chr14	+	48405791	48407929	MSTRG.11059.1	1	2139	MSTRG.11059	NA
2532	u	novel	0.00529566	-0.0004096	chr1	.	97174001	97174364	MSTRG.1106.1	1	364	MSTRG.1106	NA
26424	i	novel	0.0843825	-0.131072	chr14	-	48405791	48407929	MSTRG.11060.1	1	2139	MSTRG.11060	NA
26425	i	novel	0.0371017	-0.0090112	chr14	.	48412082	48417796	MSTRG.11061.1	1	5715	MSTRG.11061	NA
26521	i	novel	0.073825	-0.016384	chr14	.	49189880	49191611	MSTRG.11065.1	1	1732	MSTRG.11065	NA
26522	u	novel	0.00820811	-0.0495616	chr14	.	49205467	49205762	MSTRG.11066.1	1	296	MSTRG.11066	NA
26527	i	novel	0.197029	-0.0356352	chr14	+	49214622	49220359	MSTRG.11068.1	2	4391	MSTRG.11068	NA
26528	i	novel	0.032789	-0.0598016	chr14	-	49214672	49216738	MSTRG.11069.1	1	2067	MSTRG.11069	NA
26529	i	novel	0.261835	-0.0315392	chr14	-	49220585	49229154	MSTRG.11070.1	2	5141	MSTRG.11070	NA
26532	x	novel	0.0913879	-0.0335872	chr14	-	49270237	49277061	MSTRG.11072.1	2	1668	MSTRG.11072	NA
26439	i	novel	0.0333995	-0.024576	chr14	.	48567414	48569631	MSTRG.11075.1	1	2218	MSTRG.11075	NA
26440	i	novel	0.326547	-0.0372736	chr14	.	48574379	48578574	MSTRG.11076.1	1	4196	MSTRG.11076	NA
26441	i	novel	0.0543539	-0.0524288	chr14	.	48578909	48581494	MSTRG.11077.1	1	2586	MSTRG.11077	NA
26442	i	novel	0.025709	-0.088064	chr14	.	48582468	48583593	MSTRG.11078.1	1	1126	MSTRG.11078	NA
26443	i	novel	0.0257286	-0.045056	chr14	.	48584173	48585313	MSTRG.11079.1	1	1141	MSTRG.11079	NA
2513	i	novel	0.11596	-0.0004096	chr1	.	96604436	96604856	MSTRG.1108.1	1	421	MSTRG.1108	NA
26444	i	novel	0.0104517	-0.028672	chr14	.	48592938	48593585	MSTRG.11080.1	1	648	MSTRG.11080	NA
26456	i	novel	0.0206347	-0.02048	chr14	+	48783456	48783765	MSTRG.11086.1	2	212	MSTRG.11086	NA
26460	x	novel	0.00806553	-0.036864	chr14	-	48813311	48829138	MSTRG.11090.1	2	312	MSTRG.11090	NA
26463	x	novel	0.0544413	-0.0159744	chr14	-	48823454	48837582	MSTRG.11092.1	2	922	MSTRG.11092	NA
26467	x	novel	0.0136341	-0.057344	chr14	-	48828884	48842332	MSTRG.11095.1	2	258	MSTRG.11095	NA
241	i	novel	0.0139128	-0.101581	chr1	.	6007668	6007900	MSTRG.111.1	1	233	MSTRG.111	NA
26506	i	novel	0.0631254	-0.0339968	chr14	-	49000854	49007742	MSTRG.11105.1	3	655	MSTRG.11105	NA
26542	x	novel	0.0182083	-0.129434	chr14	-	49379121	49442395	MSTRG.11107.1	2	629	MSTRG.11107	NA
26543	x	novel	0.262914	-0.0049152	chr14	-	49384276	49435804	MSTRG.11108.1	2	2894	MSTRG.11108	NA
26545	i	novel	0.24893	-0.008192	chr14	-	49426491	49435804	MSTRG.11108.2	2	8451	MSTRG.11108	NA
26544	o	novel	0.0223447	-0.016384	chr14	+	49394858	49448339	MSTRG.11109.1	2	2397	MSTRG.11109	NA
26546	i	novel	0.0677427	-0.06144	chr14	+	49435836	49448418	MSTRG.11109.2	2	11077	MSTRG.11109	NA
26547	i	novel	0.01794	-0.352256	chr14	+	49435879	49439755	MSTRG.11109.3	2	2376	MSTRG.11109	NA
26548	i	novel	0.149692	-0.155648	chr14	+	49436016	49440018	MSTRG.11109.4	2	2478	MSTRG.11109	NA
2522	i	novel	0.00273323	-0.0475136	chr1	+	96690805	96691159	MSTRG.1111.1	1	355	MSTRG.1111	NA
26643	u	novel	0.258015	-0.02048	chr14	.	50169046	50171616	MSTRG.11117.1	1	2571	MSTRG.11117	NA
2525	i	novel	0.0223518	-0.206848	chr1	+	96745617	96753806	MSTRG.1112.1	2	959	MSTRG.1112	NA
2526	i	novel	0.170346	-0.0004096	chr1	-	96754431	96761812	MSTRG.1113.1	2	6573	MSTRG.1113	NA
26627	x	novel	0.212999	-0.008192	chr14	-	50065207	50112569	MSTRG.11132.1	2	2364	MSTRG.11132	NA
26634	o	novel	0.278797	-0.0086016	chr14	-	50085591	50130760	MSTRG.11132.2	3	12361	MSTRG.11132	NA
26635	i	novel	0.0946676	-0.0475136	chr14	-	50085654	50118171	MSTRG.11132.3	2	6772	MSTRG.11132	NA
26636	i	novel	0.154346	-0.028672	chr14	-	50088664	50115328	MSTRG.11132.4	2	14533	MSTRG.11132	NA
26637	i	novel	0.0201689	-0.0172032	chr14	-	50102532	50110008	MSTRG.11132.5	2	1078	MSTRG.11132	NA
26638	i	novel	0.0964832	-0.0172032	chr14	-	50102545	50115328	MSTRG.11132.6	2	4791	MSTRG.11132	NA
26628	o	novel	0.0543858	-0.04096	chr14	+	50072986	50131620	MSTRG.11133.1	2	892	MSTRG.11133	NA
26639	i	novel	0.116699	-0.016384	chr14	+	50118242	50120103	MSTRG.11134.1	2	1775	MSTRG.11134	NA
26641	i	novel	0.118873	-0.053248	chr14	-	50133380	50139540	MSTRG.11135.1	2	5515	MSTRG.11135	NA
26642	i	novel	0.0394721	-0.0024576	chr14	-	50145058	50148127	MSTRG.11136.1	1	3070	MSTRG.11136	NA
26663	x	novel	0.350293	-0.008192	chr14	+	50270867	50280979	MSTRG.11139.1	2	1715	MSTRG.11139	NA
2527	i	novel	0.109793	-0.0630784	chr1	+	96755692	96760938	MSTRG.1114.1	1	5247	MSTRG.1114	NA
26664	i	novel	0.0929084	-0.0315392	chr14	+	50282241	50286057	MSTRG.11140.1	1	3817	MSTRG.11140	NA
26665	i	novel	0.143768	-0.049152	chr14	-	50282243	50288864	MSTRG.11141.1	2	4906	MSTRG.11141	NA
26666	i	novel	0.0648956	-0.0032768	chr14	+	50291406	50297427	MSTRG.11142.1	2	5352	MSTRG.11142	NA
26653	i	novel	0.030562	-0.0004096	chr14	+	50212606	50212925	MSTRG.11146.1	1	320	MSTRG.11146	NA
26669	u	novel	0.0272158	-0.0331776	chr14	.	50349176	50350516	MSTRG.11150.1	1	1341	MSTRG.11150	NA
26670	u	novel	0.178097	-0.004096	chr14	.	50354484	50357754	MSTRG.11151.1	1	3271	MSTRG.11151	NA
26671	u	novel	0.011825	-0.0647168	chr14	.	50361210	50361511	MSTRG.11152.1	1	302	MSTRG.11152	NA
26672	u	novel	0.0261718	-0.127795	chr14	.	50362640	50362883	MSTRG.11153.1	1	244	MSTRG.11153	NA
26691	i	novel	0.130507	-0.0004096	chr14	+	50482924	50488857	MSTRG.11158.1	1	5934	MSTRG.11158	NA
26695	u	novel	0.269621	-0.0073728	chr14	-	50509843	50513548	MSTRG.11161.1	1	3706	MSTRG.11161	NA
26802	i	novel	0.0173204	-0.094208	chr14	.	51253232	51253566	MSTRG.11163.1	1	335	MSTRG.11163	NA
26811	i	novel	0.0227522	-0.02048	chr14	.	51313447	51314025	MSTRG.11166.1	1	579	MSTRG.11166	NA
26812	i	novel	0.0690461	-0.118784	chr14	.	51327107	51327942	MSTRG.11167.1	1	836	MSTRG.11167	NA
26813	i	novel	0.0679254	-0.016384	chr14	+	51329255	51337684	MSTRG.11168.1	2	3118	MSTRG.11168	NA
2548	x	novel	0.0363104	-0.0446464	chr1	+	97434159	97506968	MSTRG.1117.1	2	7162	MSTRG.1117	NA
26820	i	novel	0.0315728	-0.094208	chr14	.	51367946	51368440	MSTRG.11171.1	1	495	MSTRG.11171	NA
26822	i	novel	9.66398e-06	-0.0004096	chr14	.	51375447	51375697	MSTRG.11173.1	1	251	MSTRG.11173	NA
26827	i	novel	0.0410429	-0.0278528	chr14	-	51386223	51391248	MSTRG.11175.1	2	4502	MSTRG.11175	NA
26828	i	novel	0.120597	-0.014336	chr14	+	51391334	51396729	MSTRG.11176.1	2	3245	MSTRG.11176	NA
26835	i	novel	0.147568	-0.0417792	chr14	+	51415165	51419229	MSTRG.11178.1	1	4065	MSTRG.11178	NA
2549	i	novel	0.0673613	-0.049152	chr1	+	97441530	97446168	MSTRG.1118.1	1	4639	MSTRG.1118	NA
26867	u	novel	0.456812	-0.0229376	chr14	+	51663639	51668054	MSTRG.11181.1	1	4416	MSTRG.11181	NA
26868	u	novel	0.125062	-0.0376832	chr14	+	51664417	51668047	MSTRG.11181.2	2	1970	MSTRG.11181	NA
26869	u	novel	0.122932	-0.0376832	chr14	+	51664505	51668029	MSTRG.11181.3	2	1864	MSTRG.11181	NA
26871	u	novel	0.150301	-0.0929792	chr14	-	51665756	51668029	MSTRG.11182.2	2	613	MSTRG.11182	NA
2550	i	novel	0.0879728	-0.053248	chr1	+	97507065	97510522	MSTRG.1119.1	1	3458	MSTRG.1119	NA
26857	i	novel	0.0547573	-0.0004096	chr14	.	51506470	51507304	MSTRG.11190.1	1	835	MSTRG.11190	NA
26874	x	novel	0.130203	-0.0229376	chr14	+	51706658	51713079	MSTRG.11193.1	2	350	MSTRG.11193	NA
26878	o	novel	0.00459674	-0.0729088	chr14	-	51712790	51717235	MSTRG.11197.1	2	293	MSTRG.11197	NA
242	i	novel	0.0175165	-0.0139264	chr1	.	6024752	6024972	MSTRG.112.1	1	221	MSTRG.112	NA
26697	i	novel	0.261987	-0.057344	chr14	-	50545219	50549042	MSTRG.11201.1	2	3425	MSTRG.11201	NA
26746	i	novel	0.142208	-0.0385024	chr14	+	50707536	50710032	MSTRG.11212.1	1	2497	MSTRG.11212	NA
26758	i	novel	0.172422	-0.04096	chr14	+	50853601	50872399	MSTRG.11216.1	2	1526	MSTRG.11216	NA
26759	o	novel	0.249916	-0.0106496	chr14	-	50853879	50889159	MSTRG.11217.1	2	2129	MSTRG.11217	NA
26760	i	novel	0.0328406	-0.045056	chr14	+	50855261	50861205	MSTRG.11218.1	2	3035	MSTRG.11218	NA
26761	o	novel	0.0145834	-0.049152	chr14	+	50858063	50947633	MSTRG.11219.1	2	671	MSTRG.11219	NA
26773	i	novel	0.179029	-0.004096	chr14	.	50972397	50973008	MSTRG.11224.1	1	612	MSTRG.11224	NA
26786	i	novel	0.0752495	-0.045056	chr14	+	51110059	51111522	MSTRG.11229.1	1	1464	MSTRG.11229	NA
2556	i	novel	0.0405807	-0.0086016	chr1	+	97653335	97654396	MSTRG.1123.1	1	1062	MSTRG.1123	NA
26791	j	novel	0.0452697	-0.0933888	chr14	-	51113871	51121456	MSTRG.11230.4	5	2525	MSTRG.11230	NA
26797	i	novel	0.111242	-0.024576	chr14	.	51188207	51188595	MSTRG.11232.1	1	389	MSTRG.11232	NA
26889	u	novel	0.0366284	-0.0012288	chr14	-	51781566	51826798	MSTRG.11233.1	2	3027	MSTRG.11233	NA
26891	u	novel	0.00651482	-0.0004096	chr14	.	51897511	51897924	MSTRG.11235.1	1	414	MSTRG.11235	NA
26892	u	novel	0.0173978	-0.0004096	chr14	.	51905475	51905884	MSTRG.11236.1	1	410	MSTRG.11236	NA
26893	u	novel	0.0751866	-0.0106496	chr14	.	51937176	51940166	MSTRG.11237.1	1	2991	MSTRG.11237	NA
26894	u	novel	0.0500225	-0.065536	chr14	.	51943897	51948153	MSTRG.11238.1	1	4257	MSTRG.11238	NA
26895	u	novel	0.188056	-0.0016384	chr14	.	51948415	51957410	MSTRG.11239.1	1	8996	MSTRG.11239	NA
2557	i	novel	0.261317	-0.0303104	chr1	+	97712928	97726408	MSTRG.1124.1	1	13481	MSTRG.1124	NA
26896	u	novel	0.332859	-0.016384	chr14	.	51958728	51963634	MSTRG.11240.1	1	4907	MSTRG.11240	NA
26897	u	novel	0.0123113	-0.132301	chr14	.	51964938	51965565	MSTRG.11241.1	1	628	MSTRG.11241	NA
26898	u	novel	0.265876	-0.045056	chr14	.	51970225	51974535	MSTRG.11242.1	1	4311	MSTRG.11242	NA
26899	u	novel	0.0608094	-0.0749568	chr14	.	51975218	51984877	MSTRG.11243.1	1	9660	MSTRG.11243	NA
26901	u	novel	0.29776	-0.02048	chr14	+	51999527	52017130	MSTRG.11245.1	2	2354	MSTRG.11245	NA
26902	u	novel	0.0968846	-0.053248	chr14	.	52017216	52022385	MSTRG.11246.1	1	5170	MSTRG.11246	NA
26903	u	novel	0.0475541	-0.049152	chr14	.	52027485	52033314	MSTRG.11247.1	1	5830	MSTRG.11247	NA
26904	u	novel	0.249246	-0.038912	chr14	+	52034445	52064086	MSTRG.11248.1	1	29642	MSTRG.11248	NA
26905	u	novel	0.0851246	-0.069632	chr14	-	52064423	52082354	MSTRG.11249.1	1	17932	MSTRG.11249	NA
2558	i	novel	0.175064	-0.0294912	chr1	-	97741785	97749781	MSTRG.1125.1	2	7110	MSTRG.1125	NA
26906	u	novel	0.183015	-0.0282624	chr14	-	52082536	52130970	MSTRG.11250.1	2	6131	MSTRG.11250	NA
26907	u	novel	0.0298625	-0.057344	chr14	.	52276599	52276965	MSTRG.11251.1	1	367	MSTRG.11251	NA
26908	u	novel	0.018811	-0.0004096	chr14	.	52339135	52339583	MSTRG.11252.1	1	449	MSTRG.11252	NA
26909	u	novel	0.00698714	-0.0004096	chr14	.	52343201	52343431	MSTRG.11253.1	1	231	MSTRG.11253	NA
26910	u	novel	0.0101926	-0.0004096	chr14	.	52353609	52355908	MSTRG.11254.1	1	2300	MSTRG.11254	NA
26917	i	novel	0.0267179	-0.156877	chr14	.	54104836	54105242	MSTRG.11259.1	1	407	MSTRG.11259	NA
26918	i	novel	0.322854	-0.0126976	chr14	.	54106634	54110280	MSTRG.11260.1	1	3647	MSTRG.11260	NA
26919	i	novel	0.0120063	-0.0176128	chr14	.	54115619	54116876	MSTRG.11261.1	1	1258	MSTRG.11261	NA
26920	i	novel	0.226304	-0.0536576	chr14	.	54117701	54123913	MSTRG.11262.1	1	6213	MSTRG.11262	NA
26921	i	novel	0.0486753	-0.0004096	chr14	.	54128151	54129250	MSTRG.11263.1	1	1100	MSTRG.11263	NA
26923	u	novel	0.0128915	-0.0004096	chr14	.	54300588	54300948	MSTRG.11264.1	1	361	MSTRG.11264	NA
26924	u	novel	0.215594	-0.0282624	chr14	-	54312145	54327393	MSTRG.11265.1	1	15249	MSTRG.11265	NA
26926	u	novel	0.264536	-0.0454656	chr14	+	54340825	54404634	MSTRG.11266.2	2	9293	MSTRG.11266	NA
26936	x	novel	0.0314674	-0.02048	chr14	+	54538988	54570362	MSTRG.11269.1	2	4215	MSTRG.11269	NA
2560	i	novel	0.0447362	-0.0176128	chr1	+	97766005	97767958	MSTRG.1127.1	1	1954	MSTRG.1127	NA
26939	i	novel	0.114981	-0.196608	chr14	+	54565808	54566275	MSTRG.11270.1	1	468	MSTRG.11270	NA
26940	x	novel	0.0758198	-0.002048	chr14	+	54574548	54582075	MSTRG.11271.1	2	3133	MSTRG.11271	NA
26941	i	novel	0.0712589	-0.049152	chr14	+	54577032	54578529	MSTRG.11272.1	1	1498	MSTRG.11272	NA
26943	i	novel	0.0695387	-0.086016	chr14	+	54606838	54609052	MSTRG.11273.1	1	2215	MSTRG.11273	NA
26976	i	novel	0.156967	-0.0090112	chr14	-	55251021	55254736	MSTRG.11279.1	1	3716	MSTRG.11279	NA
2562	i	novel	0.256837	-0.0548864	chr1	+	97853362	97872225	MSTRG.1128.1	1	18864	MSTRG.1128	NA
2561	i	novel	0.252937	-0.0548864	chr1	+	97853362	97870328	MSTRG.1128.2	2	16921	MSTRG.1128	NA
26977	x	novel	0.154884	-0.069632	chr14	-	55347156	55357053	MSTRG.11280.1	2	3472	MSTRG.11280	NA
27018	j	novel	0.102996	-0.0049152	chr14	+	56118810	56128587	MSTRG.11283.2	3	6542	MSTRG.11283	NA
27020	u	novel	0.0334973	-0.0004096	chr14	.	56134593	56134978	MSTRG.11286.1	1	386	MSTRG.11286	NA
26995	x	novel	0.0295975	-0.024576	chr14	+	55871441	55897392	MSTRG.11289.1	3	1822	MSTRG.11289	NA
2563	i	novel	0.209342	-0.0475136	chr1	+	97872712	97911539	MSTRG.1129.1	2	14255	MSTRG.1129	NA
26996	o	novel	0.131143	-0.026624	chr14	-	55879279	55960906	MSTRG.11290.1	2	15677	MSTRG.11290	NA
27008	i	novel	0.131143	-0.026624	chr14	-	55937808	55960905	MSTRG.11290.2	2	22411	MSTRG.11290	NA
27009	i	novel	0.295347	-0.0131072	chr14	-	56005294	56013001	MSTRG.11293.1	1	7708	MSTRG.11293	NA
27030	i	novel	0.097255	-0.0241664	chr14	-	56672773	56673932	MSTRG.11297.1	1	1160	MSTRG.11297	NA
27031	j	novel	0.193889	-0.0176128	chr14	-	56751151	56756209	MSTRG.11298.1	2	3160	MSTRG.11298	NA
243	i	novel	0.0167198	-0.004096	chr1	.	6159134	6159620	MSTRG.113.1	1	487	MSTRG.113	NA
2564	i	novel	0.0508931	-0.02048	chr1	-	97872867	97879042	MSTRG.1130.1	2	6012	MSTRG.1130	NA
27036	i	novel	0.0811234	-0.0049152	chr14	+	57310210	57313466	MSTRG.11300.1	2	479	MSTRG.11300	NA
27053	i	novel	0.0135995	-0.0139264	chr14	.	58125069	58126137	MSTRG.11308.1	1	1069	MSTRG.11308	NA
27054	i	novel	0.00271662	-0.0557056	chr14	.	58164982	58165378	MSTRG.11309.1	1	397	MSTRG.11309	NA
2565	i	novel	0.0502979	-0.0126976	chr1	-	97897945	97899064	MSTRG.1131.1	1	1120	MSTRG.1131	NA
27057	i	novel	0.0569277	-0.0188416	chr14	.	58173245	58175873	MSTRG.11310.1	1	2629	MSTRG.11310	NA
27058	i	novel	0.00409208	-0.0970752	chr14	.	58204313	58204524	MSTRG.11311.1	1	212	MSTRG.11311	NA
27061	i	novel	0.201303	-0.049152	chr14	.	58275973	58277128	MSTRG.11312.1	1	1156	MSTRG.11312	NA
27090	u	novel	0.115456	-0.002048	chr14	.	59058669	59058945	MSTRG.11313.1	1	277	MSTRG.11313	NA
27065	i	novel	0.0169506	-0.0004096	chr14	.	58656623	58656829	MSTRG.11315.1	1	207	MSTRG.11315	NA
27067	i	novel	0.00975828	-0.0004096	chr14	.	58724932	58725201	MSTRG.11317.1	1	270	MSTRG.11317	NA
27068	i	novel	0.0415751	-0.0237568	chr14	.	58740231	58741445	MSTRG.11318.1	1	1215	MSTRG.11318	NA
27069	i	novel	0.00447085	-0.090112	chr14	.	58762476	58762937	MSTRG.11319.1	1	462	MSTRG.11319	NA
2566	i	novel	0.169178	-0.0495616	chr1	-	97916486	97933004	MSTRG.1132.1	2	11376	MSTRG.1132	NA
27070	i	novel	0.16909	-0.012288	chr14	.	58777110	58777592	MSTRG.11320.1	1	483	MSTRG.11320	NA
27071	i	novel	0.0315219	-0.0004096	chr14	.	58779730	58779972	MSTRG.11321.1	1	243	MSTRG.11321	NA
27072	i	novel	0.0765587	-0.0221184	chr14	.	58781605	58782600	MSTRG.11322.1	1	996	MSTRG.11322	NA
27073	i	novel	0.0176366	-0.0008192	chr14	.	58783551	58785344	MSTRG.11323.1	1	1794	MSTRG.11323	NA
27075	i	novel	0.066669	-0.04096	chr14	.	58797607	58798230	MSTRG.11325.1	1	624	MSTRG.11325	NA
27078	i	novel	0.00622368	-0.0004096	chr14	.	58814978	58815192	MSTRG.11328.1	1	215	MSTRG.11328	NA
27079	i	novel	0.0837703	-0.174899	chr14	.	58889768	58890121	MSTRG.11329.1	1	354	MSTRG.11329	NA
27080	u	novel	0.00635514	-0.024576	chr14	-	58929810	59022433	MSTRG.11330.1	2	678	MSTRG.11330	NA
27081	u	novel	0.0345065	-0.0004096	chr14	-	59018210	59019392	MSTRG.11330.2	2	876	MSTRG.11330	NA
27089	i	novel	0.271721	-0.0397312	chr14	+	59034817	59043468	MSTRG.11332.1	2	7877	MSTRG.11332	NA
27099	i	novel	0.169852	-0.04096	chr14	-	59120482	59146839	MSTRG.11335.1	2	26266	MSTRG.11335	NA
27100	i	novel	0.0858418	-0.02048	chr14	-	59157082	59161026	MSTRG.11336.1	1	3945	MSTRG.11336	NA
27110	i	novel	0.021298	-0.016384	chr14	-	59255195	59256162	MSTRG.11341.1	1	968	MSTRG.11341	NA
27131	x	novel	0.0346569	-0.016384	chr14	-	59552121	59553620	MSTRG.11343.1	1	1500	MSTRG.11343	NA
27124	i	novel	0.017332	-0.0155648	chr14	.	59418944	59419422	MSTRG.11346.1	1	479	MSTRG.11346	NA
27126	i	novel	0.28097	-0.057344	chr14	+	59445402	59449047	MSTRG.11347.1	2	2802	MSTRG.11347	NA
27127	i	novel	0.0964928	-0.0299008	chr14	.	59450753	59452149	MSTRG.11348.1	1	1397	MSTRG.11348	NA
27143	u	novel	0.016954	-0.0004096	chr14	.	59726724	59726938	MSTRG.11349.1	1	215	MSTRG.11349	NA
27183	x	novel	0.0256087	-0.004096	chr14	-	60318374	60332447	MSTRG.11353.1	2	2132	MSTRG.11353	NA
27156	i	novel	0.165638	-0.0811008	chr14	+	60012291	60018156	MSTRG.11356.1	1	5866	MSTRG.11356	NA
27158	i	novel	0.0179983	-0.049152	chr14	+	60042440	60043015	MSTRG.11357.1	1	576	MSTRG.11357	NA
27159	i	novel	0.227992	-0.0299008	chr14	+	60071722	60075098	MSTRG.11358.1	3	2663	MSTRG.11358	NA
2570	i	novel	0.312815	-0.0622592	chr1	+	97981286	98003556	MSTRG.1136.1	2	22251	MSTRG.1136	NA
27164	i	novel	0.30668	-0.0856064	chr14	+	60117869	60127528	MSTRG.11362.1	1	9660	MSTRG.11362	NA
27165	i	novel	0.13636	-0.0974848	chr14	+	60135378	60140667	MSTRG.11363.1	1	5290	MSTRG.11363	NA
27191	i	novel	0.0626709	-0.069632	chr14	+	60359995	60360879	MSTRG.11368.1	1	885	MSTRG.11368	NA
27192	i	novel	0.0335143	-0.016384	chr14	.	60364512	60365112	MSTRG.11369.1	1	601	MSTRG.11369	NA
2571	i	novel	0.111525	-0.0110592	chr1	+	98005097	98012234	MSTRG.1137.1	2	6543	MSTRG.1137	NA
27207	u	novel	0.0823243	-0.004096	chr14	.	60735007	60735506	MSTRG.11373.1	1	500	MSTRG.11373	NA
27208	u	novel	0.0512524	-0.0397312	chr14	.	60749354	60750321	MSTRG.11374.1	1	968	MSTRG.11374	NA
27209	o	novel	0.103723	-0.049152	chr14	-	60750735	60811976	MSTRG.11375.1	2	3447	MSTRG.11375	NA
27213	x	novel	0.148611	-0.024576	chr14	+	60799745	60816367	MSTRG.11377.1	2	4768	MSTRG.11377	NA
27221	u	novel	0.0141088	-0.0004096	chr14	.	60907883	60908209	MSTRG.11379.1	1	327	MSTRG.11379	NA
27222	u	novel	0.0241843	-0.0004096	chr14	.	60912267	60912618	MSTRG.11380.1	1	352	MSTRG.11380	NA
27228	i	novel	0.12115	-0.0114688	chr14	-	60944814	60951051	MSTRG.11383.1	1	6238	MSTRG.11383	NA
27229	u	novel	0.0132118	-0.110592	chr14	.	60970878	60972890	MSTRG.11384.1	1	2013	MSTRG.11384	NA
27230	u	novel	0.0798302	-0.212992	chr14	.	60973637	60977571	MSTRG.11385.1	1	3935	MSTRG.11385	NA
27231	u	novel	0.0655504	-0.036864	chr14	-	60982165	60986398	MSTRG.11386.1	1	4234	MSTRG.11386	NA
27241	i	novel	0.0812819	-0.012288	chr14	.	61022188	61024437	MSTRG.11387.1	1	2250	MSTRG.11387	NA
27249	i	novel	0.0118208	-0.0851968	chr14	-	61058582	61059190	MSTRG.11389.1	1	609	MSTRG.11389	NA
27250	u	novel	0.0814598	-0.0016384	chr14	-	61065996	61075336	MSTRG.11390.1	1	9341	MSTRG.11390	NA
27252	u	novel	0.198009	-0.141312	chr14	+	61068393	61072265	MSTRG.11391.2	2	2012	MSTRG.11391	NA
27253	u	novel	0.0399947	-0.16384	chr14	.	61081865	61083520	MSTRG.11392.1	1	1656	MSTRG.11392	NA
27280	u	novel	0.0291638	-0.077824	chr14	-	61687123	61688569	MSTRG.11395.1	2	1325	MSTRG.11395	NA
27281	u	novel	0.257063	-0.0856064	chr14	.	61689269	61690209	MSTRG.11396.1	1	941	MSTRG.11396	NA
27283	u	novel	0.0273432	-0.08192	chr14	-	61690997	61694018	MSTRG.11399.1	1	3022	MSTRG.11399	NA
244	i	novel	0.0216894	-0.0004096	chr1	.	6174588	6175491	MSTRG.114.1	1	904	MSTRG.114	NA
2597	i	novel	0.00439649	-0.012288	chr1	.	98535952	98536228	MSTRG.1140.1	1	277	MSTRG.1140	NA
27288	i	novel	0.0163048	-0.0004096	chr14	+	61796951	61797304	MSTRG.11401.1	1	354	MSTRG.11401	NA
27290	i	novel	0.0663806	-0.06144	chr14	-	61797545	61841415	MSTRG.11402.1	2	14484	MSTRG.11402	NA
27289	i	novel	0.0663806	-0.06144	chr14	-	61797545	61814354	MSTRG.11402.2	3	12654	MSTRG.11402	NA
27291	i	novel	0.0593532	-0.0126976	chr14	+	61808963	61814345	MSTRG.11403.1	2	2966	MSTRG.11403	NA
27292	i	novel	0.0622109	-0.0147456	chr14	+	61814403	61820592	MSTRG.11404.1	2	5492	MSTRG.11404	NA
27293	o	novel	0.192499	-0.0004096	chr14	+	61828207	62177410	MSTRG.11405.1	2	3049	MSTRG.11405	NA
27295	i	novel	0.0988006	-0.0004096	chr14	+	61897622	61897828	MSTRG.11407.1	1	207	MSTRG.11407	NA
27297	i	novel	0.164495	-0.0032768	chr14	+	61916965	61923354	MSTRG.11408.1	2	6120	MSTRG.11408	NA
2598	u	novel	0.0533983	-0.088064	chr1	.	98542448	98543886	MSTRG.1141.1	1	1439	MSTRG.1141	NA
27299	o	novel	0.0856265	-0.014336	chr14	+	61928143	62010979	MSTRG.11410.1	2	18680	MSTRG.11410	NA
27300	i	novel	0.0937718	-0.0495616	chr14	-	61947429	61970552	MSTRG.11411.1	1	23124	MSTRG.11411	NA
27301	i	novel	0.0937718	-0.0495616	chr14	-	61948758	61966112	MSTRG.11411.2	2	15085	MSTRG.11411	NA
27302	i	novel	0.0570047	-0.098304	chr14	-	62004321	62010737	MSTRG.11412.1	1	6417	MSTRG.11412	NA
27303	i	novel	0.10146	-0.026624	chr14	-	62011129	62023782	MSTRG.11413.1	1	12654	MSTRG.11413	NA
27307	i	novel	0.419991	-0.0172032	chr14	-	62550558	62557645	MSTRG.11416.1	2	1903	MSTRG.11416	NA
27308	i	novel	0.00739698	-0.0929792	chr14	-	62552008	62552302	MSTRG.11417.1	1	295	MSTRG.11417	NA
27309	i	novel	0.00352716	-0.024576	chr14	.	62555210	62555593	MSTRG.11418.1	1	384	MSTRG.11418	NA
27317	i	novel	0.0278575	-0.024576	chr14	.	63095624	63096174	MSTRG.11421.1	1	551	MSTRG.11421	NA
27324	i	novel	0.0508828	-0.012288	chr14	+	63229070	63235313	MSTRG.11423.1	1	6244	MSTRG.11423	NA
27325	i	novel	0.147048	-0.0274432	chr14	+	63242189	63267013	MSTRG.11424.1	2	24802	MSTRG.11424	NA
27367	i	novel	0.0149135	-0.0004096	chr14	.	64269739	64270020	MSTRG.11426.1	1	282	MSTRG.11426	NA
27374	i	novel	0.0565157	-0.0344064	chr14	-	64372844	64377022	MSTRG.11428.1	2	3967	MSTRG.11428	NA
2575	i	novel	0.0665526	-0.0483328	chr1	-	98137978	98166108	MSTRG.1143.1	2	3684	MSTRG.1143	NA
27342	i	novel	0.261104	-0.026624	chr14	+	63458865	63461367	MSTRG.11431.1	1	2503	MSTRG.11431	NA
27343	x	novel	0.069704	-0.036864	chr14	+	63484284	63551954	MSTRG.11432.1	2	3379	MSTRG.11432	NA
27345	x	novel	0.0562325	-0.024576	chr14	+	63526631	63553606	MSTRG.11432.2	2	5629	MSTRG.11432	NA
27346	i	novel	0.0909932	-0.0086016	chr14	+	63541481	63546321	MSTRG.11433.1	2	3540	MSTRG.11433	NA
27347	i	novel	0.0872461	-0.0315392	chr14	-	63542655	63548559	MSTRG.11434.1	2	4126	MSTRG.11434	NA
27348	i	novel	0.331409	-0.103629	chr14	+	63756311	63763634	MSTRG.11435.1	2	5559	MSTRG.11435	NA
27349	o	novel	0.298906	-0.012288	chr14	+	63781170	63851806	MSTRG.11436.1	2	15921	MSTRG.11436	NA
27351	i	novel	0.12528	-0.0036864	chr14	+	63790532	63800016	MSTRG.11437.1	2	5050	MSTRG.11437	NA
27352	u	novel	0.304741	-0.008192	chr14	-	63810224	63834033	MSTRG.11438.1	2	14949	MSTRG.11438	NA
27353	u	novel	0.287463	-0.022528	chr14	+	63860456	63874263	MSTRG.11439.1	1	13808	MSTRG.11439	NA
27354	u	novel	0.0595354	-0.106496	chr14	+	63870793	63874226	MSTRG.11439.2	2	2246	MSTRG.11439	NA
2576	i	novel	0.09959	-0.155648	chr1	+	98152988	98156089	MSTRG.1144.1	2	777	MSTRG.1144	NA
27355	u	novel	0.0654447	-0.0176128	chr14	+	63889836	63912690	MSTRG.11440.1	2	22318	MSTRG.11440	NA
27357	u	novel	0.0526457	-0.0004096	chr14	-	64037540	64043670	MSTRG.11441.1	2	4262	MSTRG.11441	NA
27358	u	novel	0.0811145	-0.118784	chr14	-	64053319	64060944	MSTRG.11442.1	2	6947	MSTRG.11442	NA
27359	u	novel	0.0987523	-0.016384	chr14	+	64117355	64190447	MSTRG.11443.1	2	328	MSTRG.11443	NA
27360	u	novel	0.040895	-0.0004096	chr14	+	64154864	64180603	MSTRG.11444.1	2	3040	MSTRG.11444	NA
27361	u	novel	0.00968519	-0.0004096	chr14	+	64160806	64161122	MSTRG.11445.1	1	317	MSTRG.11445	NA
27377	i	novel	0.0712107	-0.0004096	chr14	.	65171897	65172275	MSTRG.11447.1	1	379	MSTRG.11447	NA
27378	i	novel	0.0313194	-0.028672	chr14	.	65211382	65212723	MSTRG.11448.1	1	1342	MSTRG.11448	NA
27379	i	novel	0.0574022	-0.12329	chr14	.	65223230	65223620	MSTRG.11449.1	1	391	MSTRG.11449	NA
2577	i	novel	0.0243164	-0.008192	chr1	-	98154482	98156089	MSTRG.1145.1	2	1284	MSTRG.1145	NA
27380	i	novel	0.014408	-0.065536	chr14	.	65232921	65233165	MSTRG.11450.1	1	245	MSTRG.11450	NA
27381	i	novel	0.0528076	-0.045056	chr14	.	65241267	65241575	MSTRG.11451.1	1	309	MSTRG.11451	NA
27382	i	novel	0.0243104	-0.057344	chr14	.	65252009	65252539	MSTRG.11452.1	1	531	MSTRG.11452	NA
27387	i	novel	0.0777107	-0.028672	chr14	+	65463421	65468137	MSTRG.11454.1	2	4642	MSTRG.11454	NA
27388	i	novel	0.0996672	-0.0045056	chr14	-	65516668	65518947	MSTRG.11455.1	1	2280	MSTRG.11455	NA
27391	u	novel	0.0298349	-0.024576	chr14	.	65673989	65679416	MSTRG.11456.1	1	5428	MSTRG.11456	NA
27394	i	novel	0.0402596	-0.06144	chr14	.	65714606	65715224	MSTRG.11458.1	1	619	MSTRG.11458	NA
27395	i	novel	0.00612139	-0.0004096	chr14	.	65721073	65721521	MSTRG.11459.1	1	449	MSTRG.11459	NA
2578	i	novel	0.0644291	-0.139264	chr1	.	98167408	98168043	MSTRG.1146.1	1	636	MSTRG.1146	NA
27411	i	novel	0.0207472	-0.138035	chr14	.	66618406	66618645	MSTRG.11464.1	1	240	MSTRG.11464	NA
27425	x	novel	0.124153	-0.049152	chr14	+	66642185	66724687	MSTRG.11465.1	4	27633	MSTRG.11465	NA
27433	x	novel	0.0563409	-0.026624	chr14	+	66692985	66798823	MSTRG.11465.2	2	12164	MSTRG.11465	NA
27435	i	novel	0.124153	-0.049152	chr14	+	66694582	66724686	MSTRG.11465.3	2	27833	MSTRG.11465	NA
27426	i	novel	0.0267264	-0.049152	chr14	+	66652838	66656413	MSTRG.11466.1	2	2330	MSTRG.11466	NA
27434	i	novel	0.0628966	-0.069632	chr14	-	66694559	66711796	MSTRG.11467.1	2	15437	MSTRG.11467	NA
27436	i	novel	0.0459378	-0.014336	chr14	.	66750874	66753875	MSTRG.11468.1	1	3002	MSTRG.11468	NA
27437	i	novel	0.132201	-0.0237568	chr14	-	66755483	66785911	MSTRG.11469.1	2	27738	MSTRG.11469	NA
2579	i	novel	0.0206329	-0.0233472	chr1	.	98182844	98183246	MSTRG.1147.1	1	403	MSTRG.1147	NA
27438	i	novel	0.0668059	-0.0438272	chr14	+	66756763	66765235	MSTRG.11470.1	2	7934	MSTRG.11470	NA
27439	i	novel	0.0801994	-0.0028672	chr14	-	66785973	66800453	MSTRG.11471.1	1	14481	MSTRG.11471	NA
27440	i	novel	0.117967	-0.0057344	chr14	+	66800518	66817959	MSTRG.11472.1	1	17442	MSTRG.11472	NA
27441	i	novel	0.0987718	-0.192512	chr14	+	66802772	66812434	MSTRG.11472.2	2	8555	MSTRG.11472	NA
27444	i	novel	0.0642931	-0.008192	chr14	-	66826354	66830940	MSTRG.11474.1	2	3964	MSTRG.11474	NA
27445	i	novel	0.126245	-0.118784	chr14	+	66838625	66848316	MSTRG.11475.1	2	9192	MSTRG.11475	NA
27446	i	novel	0.172782	-0.045056	chr14	+	66848367	66866794	MSTRG.11476.1	2	4046	MSTRG.11476	NA
27447	o	novel	0.143142	-0.0053248	chr14	-	66848386	66958153	MSTRG.11477.1	3	27480	MSTRG.11477	NA
27451	i	novel	0.428711	-0.0110592	chr14	-	66866918	66894726	MSTRG.11477.2	2	27219	MSTRG.11477	NA
27454	i	novel	0.303219	-0.004096	chr14	-	66923202	66943766	MSTRG.11477.3	2	17654	MSTRG.11477	NA
27457	i	novel	0.333829	-0.0053248	chr14	-	66932202	66957911	MSTRG.11477.4	2	13558	MSTRG.11477	NA
27458	i	novel	0.156209	-0.0053248	chr14	-	66944626	66966120	MSTRG.11477.5	2	16394	MSTRG.11477	NA
27459	i	novel	0.447781	-0.196608	chr14	-	66946284	66953427	MSTRG.11477.6	2	4707	MSTRG.11477	NA
27463	i	novel	0.082517	-0.0188416	chr14	-	66970169	66981521	MSTRG.11479.1	2	6617	MSTRG.11479	NA
2583	o	novel	0.112924	-0.016384	chr1	+	98288690	98356472	MSTRG.1148.1	2	1396	MSTRG.1148	NA
27464	i	novel	0.0253199	-0.02048	chr14	-	66981699	67011232	MSTRG.11480.1	2	2750	MSTRG.11480	NA
27465	i	novel	0.0489979	-0.065536	chr14	+	66982491	66992580	MSTRG.11481.1	2	7369	MSTRG.11481	NA
27466	i	novel	0.0758654	-0.0045056	chr14	-	67018017	67025932	MSTRG.11482.1	1	7916	MSTRG.11482	NA
27467	i	novel	0.0792748	-0.057344	chr14	+	67024090	67031484	MSTRG.11483.1	2	3492	MSTRG.11483	NA
27468	i	novel	0.090241	-0.0147456	chr14	-	67027329	67029903	MSTRG.11484.1	1	2575	MSTRG.11484	NA
27469	i	novel	0.0269737	-0.036864	chr14	-	67049140	67052755	MSTRG.11485.1	1	3616	MSTRG.11485	NA
27470	u	novel	0.08448	-0.0139264	chr14	+	67079042	67101382	MSTRG.11486.1	3	4968	MSTRG.11486	NA
27471	u	novel	0.0478727	-0.151552	chr14	-	67089878	67093357	MSTRG.11487.1	1	3480	MSTRG.11487	NA
27472	u	novel	0.0231027	-0.0274432	chr14	.	67103159	67105246	MSTRG.11488.1	1	2088	MSTRG.11488	NA
27473	u	novel	0.0308572	-0.086016	chr14	.	67106026	67107392	MSTRG.11489.1	1	1367	MSTRG.11489	NA
27481	i	novel	0.00356637	-0.151552	chr14	.	70188858	70189265	MSTRG.11493.1	1	408	MSTRG.11493	NA
27482	i	novel	0.0446634	-0.0004096	chr14	.	70708406	70708620	MSTRG.11494.1	1	215	MSTRG.11494	NA
27489	i	novel	0.0158575	-0.108954	chr14	-	71094803	71095688	MSTRG.11498.1	2	539	MSTRG.11498	NA
27490	i	novel	0.0595869	-0.012288	chr14	-	71101748	71110503	MSTRG.11499.1	1	8756	MSTRG.11499	NA
245	i	novel	0.045301	-0.069632	chr1	.	6190443	6190936	MSTRG.115.1	1	494	MSTRG.115	NA
2585	i	novel	0.0125131	-0.012288	chr1	-	98356614	98357297	MSTRG.1150.1	1	684	MSTRG.1150	NA
27492	i	novel	0.00431997	-0.0004096	chr14	-	71113133	71113519	MSTRG.11500.1	1	387	MSTRG.11500	NA
27501	i	novel	0.0235669	-0.069632	chr14	+	71129537	71133013	MSTRG.11502.1	2	1918	MSTRG.11502	NA
27503	i	novel	0.127125	-0.049152	chr14	+	71152496	71154746	MSTRG.11504.1	1	2251	MSTRG.11504	NA
27504	i	novel	0.0808906	-0.032768	chr14	+	71156869	71160656	MSTRG.11505.1	1	3788	MSTRG.11505	NA
27505	i	novel	0.0895475	-0.0004096	chr14	-	71168565	71169087	MSTRG.11506.1	1	523	MSTRG.11506	NA
27510	i	novel	0.0164664	-0.176128	chr14	.	71235162	71236338	MSTRG.11508.1	1	1177	MSTRG.11508	NA
27511	i	novel	0.174946	-0.0466944	chr14	.	71253683	71258672	MSTRG.11509.1	1	4990	MSTRG.11509	NA
2586	i	novel	0.334471	-0.0393216	chr1	+	98365267	98370609	MSTRG.1151.1	2	3411	MSTRG.1151	NA
27540	o	novel	0.0283622	-0.12288	chr14	-	71494168	71503189	MSTRG.11512.1	2	1784	MSTRG.11512	NA
27544	i	novel	0.0382197	-0.024576	chr14	+	71530134	71531693	MSTRG.11514.1	1	1560	MSTRG.11514	NA
27548	i	novel	0.0132886	-0.16384	chr14	.	71585077	71585462	MSTRG.11517.1	1	386	MSTRG.11517	NA
27551	i	novel	0.0457557	-0.0004096	chr14	.	71622680	71622938	MSTRG.11519.1	1	259	MSTRG.11519	NA
2587	i	novel	0.0697716	-0.0393216	chr1	-	98379094	98380869	MSTRG.1152.1	1	1776	MSTRG.1152	NA
27552	i	novel	0.0686364	-0.0049152	chr14	.	71630802	71631163	MSTRG.11520.1	1	362	MSTRG.11520	NA
27577	u	novel	0.0316937	-0.06144	chr14	.	71902005	71902901	MSTRG.11522.1	1	897	MSTRG.11522	NA
27559	i	novel	0.0132622	-0.0004096	chr14	-	71726999	71733114	MSTRG.11524.1	2	831	MSTRG.11524	NA
27560	i	novel	0.073475	-0.073728	chr14	-	71727204	71727932	MSTRG.11525.1	1	729	MSTRG.11525	NA
27561	i	novel	0.139396	-0.0262144	chr14	-	71733653	71737414	MSTRG.11526.1	1	3762	MSTRG.11526	NA
27569	i	novel	0.0348414	-0.016384	chr14	+	71829773	71838854	MSTRG.11528.1	2	6850	MSTRG.11528	NA
27570	i	novel	0.065132	-0.0126976	chr14	-	71831892	71838854	MSTRG.11529.1	1	6963	MSTRG.11529	NA
27571	i	novel	0.030548	-0.0073728	chr14	-	71832099	71839380	MSTRG.11529.2	2	6520	MSTRG.11529	NA
27572	o	novel	0.0313494	-0.090112	chr14	-	71840182	71867085	MSTRG.11530.1	2	2273	MSTRG.11530	NA
27575	x	novel	0.0447735	-0.049152	chr14	-	71869500	71878433	MSTRG.11532.1	2	3107	MSTRG.11532	NA
27587	i	novel	0.035194	-0.032768	chr14	-	72088713	72093065	MSTRG.11538.1	2	2275	MSTRG.11538	NA
2589	i	novel	0.0738324	-0.0909312	chr1	+	98420251	98422655	MSTRG.1154.1	1	2405	MSTRG.1154	NA
27589	x	novel	0.0573203	-0.028672	chr14	-	72185781	72210317	MSTRG.11540.1	3	1051	MSTRG.11540	NA
27590	u	novel	0.0049731	-0.0004096	chr14	.	72204251	72204487	MSTRG.11541.1	1	237	MSTRG.11541	NA
27605	u	novel	0.0401225	-0.0339968	chr14	+	72344193	72351765	MSTRG.11543.1	2	6074	MSTRG.11543	NA
27606	u	novel	0.0340757	-0.057344	chr14	+	72361914	72364053	MSTRG.11544.1	2	1709	MSTRG.11544	NA
27609	i	novel	0.141844	-0.008192	chr14	-	72387116	72390320	MSTRG.11547.1	2	2136	MSTRG.11547	NA
2590	i	novel	0.134756	-0.0196608	chr1	+	98438648	98444706	MSTRG.1155.1	2	2940	MSTRG.1155	NA
27613	u	novel	0.219368	-0.0212992	chr14	+	72485541	72491491	MSTRG.11551.1	1	5951	MSTRG.11551	NA
27616	u	novel	0.0123475	-0.059392	chr14	+	72495685	72497812	MSTRG.11554.1	2	1668	MSTRG.11554	NA
2591	i	novel	0.0931604	-0.239616	chr1	-	98438854	98439142	MSTRG.1156.1	1	289	MSTRG.1156	NA
27640	u	novel	4.48355e-06	-0.0004096	chr14	.	73119398	73119643	MSTRG.11563.1	1	246	MSTRG.11563	NA
27646	o	novel	0.00749342	-0.0004096	chr14	-	73285559	73327080	MSTRG.11567.1	2	645	MSTRG.11567	NA
27649	i	novel	0.0480015	-0.0487424	chr14	-	73333518	73337629	MSTRG.11569.1	1	4112	MSTRG.11569	NA
2592	i	novel	0.0882167	-0.107725	chr1	.	98445905	98446190	MSTRG.1157.1	1	286	MSTRG.1157	NA
27655	i	novel	0.0556953	-0.0090112	chr14	.	73463423	73463785	MSTRG.11571.1	1	363	MSTRG.11571	NA
27656	i	novel	0.0139463	-0.0004096	chr14	.	73471758	73472093	MSTRG.11572.1	1	336	MSTRG.11572	NA
27657	u	novel	0.0443612	-0.0004096	chr14	.	73494489	73494880	MSTRG.11573.1	1	392	MSTRG.11573	NA
27658	u	novel	0.0230147	-0.045056	chr14	.	73496225	73497689	MSTRG.11574.1	1	1465	MSTRG.11574	NA
27659	u	novel	0.0520751	-0.012288	chr14	.	73499462	73500207	MSTRG.11575.1	1	746	MSTRG.11575	NA
27664	i	novel	0.00481963	-0.02048	chr14	.	73560569	73560843	MSTRG.11579.1	1	275	MSTRG.11579	NA
2593	i	novel	0.260629	-0.159744	chr1	-	98447241	98448202	MSTRG.1158.1	1	962	MSTRG.1158	NA
27666	i	novel	0.104511	-0.069632	chr14	.	73565651	73566047	MSTRG.11580.1	1	397	MSTRG.11580	NA
27667	i	novel	0.0538912	-0.0708608	chr14	.	73621885	73622433	MSTRG.11581.1	1	549	MSTRG.11581	NA
27681	u	novel	0.0877232	-0.0073728	chr14	.	73785893	73788107	MSTRG.11585.1	1	2215	MSTRG.11585	NA
27682	u	novel	0.0119069	-0.032768	chr14	.	73793485	73793918	MSTRG.11586.1	1	434	MSTRG.11586	NA
27685	u	novel	0.0597495	-0.0331776	chr14	-	74072388	74080112	MSTRG.11588.1	1	7725	MSTRG.11588	NA
2607	u	novel	0.101619	-0.0004096	chr1	.	99031888	99032178	MSTRG.1159.1	1	291	MSTRG.1159	NA
27689	i	novel	0.0305538	-0.04096	chr14	.	74234716	74235175	MSTRG.11591.1	1	460	MSTRG.11591	NA
27690	i	novel	0.00775977	-0.028672	chr14	.	74239400	74239677	MSTRG.11592.1	1	278	MSTRG.11592	NA
27691	i	novel	0.0898184	-0.147046	chr14	.	74250946	74251305	MSTRG.11593.1	1	360	MSTRG.11593	NA
27700	x	novel	0.301191	-0.0249856	chr14	+	74683437	74693033	MSTRG.11598.1	1	9597	MSTRG.11598	NA
246	i	novel	0.0766287	-0.0004096	chr1	.	6195397	6195701	MSTRG.116.1	1	305	MSTRG.116	NA
27709	i	novel	0.0240055	-0.04096	chr14	+	74758897	74797363	MSTRG.11600.1	4	1091	MSTRG.11600	NA
27711	i	novel	0.0325756	-0.107315	chr14	+	74767478	74768988	MSTRG.11602.1	2	1484	MSTRG.11602	NA
2603	i	novel	0.248853	-0.0356352	chr1	+	98691174	98699151	MSTRG.1161.1	1	7978	MSTRG.1161	NA
27750	i	novel	0.0540753	-0.0086016	chr14	-	75323795	75327127	MSTRG.11612.1	2	3236	MSTRG.11612	NA
27752	i	novel	0.099079	-0.167936	chr14	+	75339086	75341138	MSTRG.11613.1	1	2053	MSTRG.11613	NA
27753	i	novel	0.0118367	-0.212992	chr14	-	75342523	75347891	MSTRG.11614.1	2	4313	MSTRG.11614	NA
27757	i	novel	0.0491122	-0.024576	chr14	-	75370390	75371917	MSTRG.11616.1	2	1463	MSTRG.11616	NA
27762	i	novel	0.130519	-0.133939	chr14	+	75518806	75530413	MSTRG.11618.1	2	10437	MSTRG.11618	NA
27763	i	novel	0.0402227	-0.0872448	chr14	-	75518806	75530413	MSTRG.11619.1	2	10322	MSTRG.11619	NA
2604	o	novel	0.0423185	-0.04096	chr1	-	98798076	98859804	MSTRG.1162.1	2	1844	MSTRG.1162	NA
27765	i	novel	0.214793	-0.0004096	chr14	-	75540738	75570502	MSTRG.11620.1	1	29765	MSTRG.11620	NA
27766	i	novel	0.0203175	-0.08192	chr14	+	75570592	75576391	MSTRG.11621.1	2	5778	MSTRG.11621	NA
27767	i	novel	0.0593705	-0.0016384	chr14	-	75587604	75604695	MSTRG.11622.1	2	12216	MSTRG.11622	NA
27768	o	novel	0.0368324	-0.022528	chr14	+	75588841	75682305	MSTRG.11623.1	2	4121	MSTRG.11623	NA
27769	i	novel	0.0836639	-0.065536	chr14	-	75606223	75613893	MSTRG.11624.1	1	7671	MSTRG.11624	NA
27770	i	novel	0.0231511	-0.139674	chr14	-	75624283	75624653	MSTRG.11625.1	1	371	MSTRG.11625	NA
27771	i	novel	0.120381	-0.012288	chr14	+	75642633	75644893	MSTRG.11626.1	2	2147	MSTRG.11626	NA
27778	i	novel	0.042421	-0.147456	chr14	+	75852553	75854928	MSTRG.11628.1	1	2376	MSTRG.11628	NA
27779	i	novel	0.0621688	-0.0004096	chr14	+	75856741	75858490	MSTRG.11629.1	1	1750	MSTRG.11629	NA
2605	i	novel	0.0729565	-0.0004096	chr1	+	98845236	98857992	MSTRG.1163.1	2	10647	MSTRG.1163	NA
27782	i	novel	0.0324395	-0.028672	chr14	+	75881967	75888749	MSTRG.11630.1	2	5936	MSTRG.11630	NA
27798	i	novel	0.144875	-0.069632	chr14	-	76000061	76004309	MSTRG.11634.1	2	1286	MSTRG.11634	NA
27800	j	novel	0.0394223	-0.0733184	chr14	-	76070924	76074893	MSTRG.11635.2	3	2200	MSTRG.11635	NA
2608	j	novel	0.0708111	-0.0499712	chr1	-	99034992	99043191	MSTRG.1164.1	3	2314	MSTRG.1164	NA
2610	j	novel	0.120413	-0.0503808	chr1	-	99036368	99043191	MSTRG.1164.3	3	941	MSTRG.1164	NA
27822	x	novel	0.0555135	-0.0892928	chr14	+	76295827	76309402	MSTRG.11644.1	3	10388	MSTRG.11644	NA
27866	i	novel	0.0275048	-0.0057344	chr14	+	76553152	76556201	MSTRG.11649.1	2	2031	MSTRG.11649	NA
2611	i	novel	0.0434604	-0.002048	chr1	-	99039207	99041005	MSTRG.1165.1	2	1245	MSTRG.1165	NA
27877	i	novel	0.131095	-0.079872	chr14	-	76700455	76721646	MSTRG.11651.1	2	14241	MSTRG.11651	NA
27878	x	novel	0.0267753	-0.06144	chr14	-	76712160	76760825	MSTRG.11651.2	3	2688	MSTRG.11651	NA
27882	x	novel	0.302415	-0.0446464	chr14	-	76732345	76762376	MSTRG.11651.5	3	20881	MSTRG.11651	NA
27881	i	novel	0.0964707	-0.188416	chr14	+	76728835	76736920	MSTRG.11652.1	2	3737	MSTRG.11652	NA
27883	x	novel	0.167755	-0.0712704	chr14	-	76797367	76797627	MSTRG.11653.1	2	232	MSTRG.11653	NA
27896	i	novel	0.0140026	-0.0004096	chr14	.	76838995	76839807	MSTRG.11656.1	1	813	MSTRG.11656	NA
27898	i	novel	0.0222541	-0.0004096	chr14	.	76928872	76930107	MSTRG.11657.1	1	1236	MSTRG.11657	NA
27899	i	novel	0.0129769	-0.12288	chr14	.	76938114	76939251	MSTRG.11658.1	1	1138	MSTRG.11658	NA
27900	i	novel	0.00610613	-0.0004096	chr14	.	76999181	76999530	MSTRG.11659.1	1	350	MSTRG.11659	NA
27901	i	novel	0.16923	-0.0004096	chr14	.	77004901	77005220	MSTRG.11660.1	1	320	MSTRG.11660	NA
27902	i	novel	0.0114092	-0.0004096	chr14	.	77111388	77112117	MSTRG.11661.1	1	730	MSTRG.11661	NA
27931	u	novel	0.00750152	-0.116326	chr14	.	77794354	77794648	MSTRG.11664.1	1	295	MSTRG.11664	NA
27903	x	novel	0.0469327	-0.032768	chr14	-	77340913	77429681	MSTRG.11665.1	2	1537	MSTRG.11665	NA
27905	x	novel	0.0430544	-0.024576	chr14	-	77390372	77447242	MSTRG.11667.1	2	9432	MSTRG.11667	NA
27906	x	novel	0.122675	-0.0528384	chr14	-	77400178	77476562	MSTRG.11667.2	2	13129	MSTRG.11667	NA
27915	i	novel	0.179805	-0.0004096	chr14	-	77453122	77478332	MSTRG.11667.3	2	11866	MSTRG.11667	NA
27916	i	novel	0.108221	-0.032768	chr14	+	77481058	77484382	MSTRG.11668.1	1	3325	MSTRG.11668	NA
27918	i	novel	0.13293	-0.016384	chr14	-	77505773	77517223	MSTRG.11670.1	2	11362	MSTRG.11670	NA
27932	u	novel	0.0817337	-0.0159744	chr14	-	77914770	77921685	MSTRG.11674.1	1	6916	MSTRG.11674	NA
27934	u	novel	0.0593553	-0.0004096	chr14	.	77932544	77932762	MSTRG.11676.1	1	219	MSTRG.11676	NA
27935	u	novel	0.133201	-0.0692224	chr14	.	77934313	77934999	MSTRG.11677.1	1	687	MSTRG.11677	NA
27936	u	novel	0.00279667	-0.0507904	chr14	-	77935662	77936257	MSTRG.11678.1	2	270	MSTRG.11678	NA
27937	u	novel	0.207194	-0.053248	chr14	+	77946308	78040170	MSTRG.11679.1	2	51559	MSTRG.11679	NA
27938	u	novel	0.305306	-0.004096	chr14	+	77958234	77967172	MSTRG.11680.1	2	3232	MSTRG.11680	NA
27939	u	novel	0.205514	-0.02048	chr14	-	77967264	78050620	MSTRG.11681.1	2	20922	MSTRG.11681	NA
27941	u	novel	0.275345	-0.0475136	chr14	+	78040358	78134423	MSTRG.11683.1	2	35504	MSTRG.11683	NA
27945	u	novel	0.0727264	-0.016384	chr14	+	78120535	78122528	MSTRG.11683.2	2	1094	MSTRG.11683	NA
27944	u	novel	0.0860934	-0.04096	chr14	-	78081939	78099602	MSTRG.11685.1	2	14121	MSTRG.11685	NA
27946	u	novel	0.303662	-0.0561152	chr14	+	78134434	78217886	MSTRG.11686.1	1	83453	MSTRG.11686	NA
27947	u	novel	0.273773	-0.0004096	chr14	-	78217922	78287092	MSTRG.11687.1	1	69171	MSTRG.11687	NA
27949	u	novel	0.0895146	-0.0258048	chr14	-	78315519	78336672	MSTRG.11689.1	1	21154	MSTRG.11689	NA
27962	i	novel	0.11533	-0.0004096	chr14	+	79360880	79361130	MSTRG.11694.1	2	219	MSTRG.11694	NA
27964	i	novel	0.139809	-0.077824	chr14	+	79536219	79543241	MSTRG.11695.1	1	7023	MSTRG.11695	NA
27965	i	novel	0.171246	-0.0016384	chr14	+	79669904	79684636	MSTRG.11696.1	1	14733	MSTRG.11696	NA
27966	i	novel	0.361972	-0.004096	chr14	+	79691420	79697456	MSTRG.11697.1	1	6037	MSTRG.11697	NA
27967	i	novel	0.0800399	-0.036864	chr14	-	79719572	79771541	MSTRG.11698.1	2	7978	MSTRG.11698	NA
27968	i	novel	0.322434	-0.0569344	chr14	+	79750238	79760941	MSTRG.11699.1	1	10704	MSTRG.11699	NA
247	i	novel	0.0142168	-0.0004096	chr1	.	6213183	6213499	MSTRG.117.1	1	317	MSTRG.117	NA
2626	u	novel	0.383658	-0.0258048	chr1	+	99194962	99207838	MSTRG.1170.1	1	12877	MSTRG.1170	NA
27970	i	novel	0.135037	-0.0008192	chr14	+	79810729	79816069	MSTRG.11700.2	1	5341	MSTRG.11700	NA
27971	i	novel	0.0826719	-0.032768	chr14	+	79817549	79819059	MSTRG.11701.1	1	1511	MSTRG.11701	NA
27972	i	novel	0.172968	-0.0753664	chr14	+	79825909	79872644	MSTRG.11702.1	1	46736	MSTRG.11702	NA
27973	i	novel	0.115342	-0.0073728	chr14	+	79892896	79896102	MSTRG.11703.1	1	3207	MSTRG.11703	NA
27974	i	novel	0.0672329	-0.0196608	chr14	+	79903158	79908338	MSTRG.11704.1	1	5181	MSTRG.11704	NA
27975	i	novel	0.415458	-0.0217088	chr14	+	79912112	79922751	MSTRG.11705.1	1	10640	MSTRG.11705	NA
27977	i	novel	0.462157	-0.0454656	chr14	+	80010176	80071421	MSTRG.11707.1	3	48762	MSTRG.11707	NA
27980	i	novel	0.109014	-0.0688128	chr14	+	80071475	80105552	MSTRG.11709.1	2	26589	MSTRG.11709	NA
2627	u	novel	0.0389011	-0.065536	chr1	.	99218983	99221257	MSTRG.1171.1	1	2275	MSTRG.1171	NA
27988	x	novel	0.119922	-0.0110592	chr14	+	80307690	80344951	MSTRG.11711.1	2	4146	MSTRG.11711	NA
27990	i	novel	0.106676	-0.0311296	chr14	+	80346669	80359843	MSTRG.11713.1	2	9923	MSTRG.11713	NA
27991	i	novel	0.0650698	-0.0004096	chr14	-	80350565	80356474	MSTRG.11714.1	2	2658	MSTRG.11714	NA
27992	i	novel	0.146639	-0.0344064	chr14	+	80359916	80371961	MSTRG.11715.1	3	7749	MSTRG.11715	NA
27993	i	novel	0.0464093	-0.0458752	chr14	+	80372092	80374234	MSTRG.11716.1	2	1887	MSTRG.11716	NA
2628	u	novel	0.00968563	-0.098304	chr1	.	99230934	99231269	MSTRG.1172.1	1	336	MSTRG.1172	NA
28006	u	novel	0.460254	-0.0221184	chr14	.	80521381	80539868	MSTRG.11721.1	1	18488	MSTRG.11721	NA
28007	u	novel	0.129911	-0.114688	chr14	.	80555573	80559611	MSTRG.11722.1	1	4039	MSTRG.11722	NA
28008	u	novel	0.115274	-0.008192	chr14	.	80584882	80586835	MSTRG.11723.1	1	1954	MSTRG.11723	NA
28009	u	novel	0.0499807	-0.0139264	chr14	.	80616659	80617631	MSTRG.11724.1	1	973	MSTRG.11724	NA
28010	u	novel	0.103095	-0.0237568	chr14	+	80919903	80936045	MSTRG.11725.1	1	16143	MSTRG.11725	NA
28011	u	novel	0.289463	-0.02048	chr14	+	80936100	80948206	MSTRG.11726.1	2	11799	MSTRG.11726	NA
28013	u	novel	0.356762	-0.0442368	chr14	.	80985915	81022868	MSTRG.11728.1	1	36954	MSTRG.11728	NA
28014	u	novel	0.0209686	-0.0356352	chr14	.	81023715	81024896	MSTRG.11729.1	1	1182	MSTRG.11729	NA
2629	u	novel	0.0442083	-0.014336	chr1	.	99232625	99236446	MSTRG.1173.1	1	3822	MSTRG.1173	NA
28016	u	novel	0.473545	-0.016384	chr14	+	81042077	81043764	MSTRG.11731.1	1	1688	MSTRG.11731	NA
28017	u	novel	0.152652	-0.0413696	chr14	.	81048141	81050280	MSTRG.11732.1	1	2140	MSTRG.11732	NA
28018	u	novel	0.0311108	-0.04096	chr14	.	81069906	81071532	MSTRG.11733.1	1	1627	MSTRG.11733	NA
28019	u	novel	0.0639059	-0.0262144	chr14	.	81086006	81086436	MSTRG.11734.1	1	431	MSTRG.11734	NA
28056	i	novel	0.493275	-0.0356352	chr14	+	81710793	81718682	MSTRG.11738.1	2	7292	MSTRG.11738	NA
2630	u	novel	0.0438494	-0.032768	chr1	.	99258703	99261942	MSTRG.1174.1	1	3240	MSTRG.1174	NA
28068	j	novel	0.287176	-0.049152	chr14	-	81930486	81940417	MSTRG.11740.1	4	3106	MSTRG.11740	NA
28064	i	novel	0.190188	-0.0036864	chr14	-	81837924	81839577	MSTRG.11742.1	1	1654	MSTRG.11742	NA
28065	i	novel	0.0515265	-0.024576	chr14	+	81847217	81858893	MSTRG.11743.1	2	2654	MSTRG.11743	NA
28066	i	novel	0.0219928	-0.0053248	chr14	-	81870735	81872527	MSTRG.11744.1	1	1793	MSTRG.11744	NA
28086	i	novel	0.0183506	-0.106496	chr14	.	82199918	82200137	MSTRG.11748.1	1	220	MSTRG.11748	NA
2631	u	novel	0.0951469	-0.0671744	chr1	.	99270829	99271355	MSTRG.1175.1	1	527	MSTRG.1175	NA
28025	u	novel	0.230315	-0.0417792	chr14	-	81407514	81450381	MSTRG.11751.1	1	42868	MSTRG.11751	NA
28035	u	novel	0.1688	-0.0749568	chr14	-	81465330	81468309	MSTRG.11752.1	1	2980	MSTRG.11752	NA
28047	x	novel	0.3552	-0.0397312	chr14	-	81644259	81647949	MSTRG.11757.1	1	3691	MSTRG.11757	NA
28103	i	novel	0.104721	-0.0335872	chr14	-	82338872	82344431	MSTRG.11759.1	1	5560	MSTRG.11759	NA
28107	u	novel	0.0233281	-0.0004096	chr14	.	83351753	83352105	MSTRG.11760.1	1	353	MSTRG.11760	NA
28108	u	novel	0.112787	-0.0004096	chr14	.	83400897	83401218	MSTRG.11761.1	1	322	MSTRG.11761	NA
28111	u	novel	0.0301544	-0.0405504	chr14	.	83937835	83938073	MSTRG.11762.1	1	239	MSTRG.11762	NA
28116	i	novel	0.0320315	-0.0004096	chr14	.	84628158	84628387	MSTRG.11766.1	1	230	MSTRG.11766	NA
28117	i	novel	0.0159891	-0.131072	chr14	.	84638971	84639584	MSTRG.11767.1	1	614	MSTRG.11767	NA
28118	i	novel	0.0268754	-0.114688	chr14	.	84729000	84729656	MSTRG.11768.1	1	657	MSTRG.11768	NA
28119	u	novel	0.0740729	-0.0004096	chr14	.	84948041	84948381	MSTRG.11769.1	1	341	MSTRG.11769	NA
28121	u	novel	0.0298789	-0.02048	chr14	.	85089308	85089548	MSTRG.11770.1	1	241	MSTRG.11770	NA
28122	u	novel	0.0120835	-0.0004096	chr14	.	85218205	85218429	MSTRG.11771.1	1	225	MSTRG.11771	NA
28127	i	novel	0.0521452	-0.032768	chr14	-	85391806	85393933	MSTRG.11774.1	1	2128	MSTRG.11774	NA
2637	o	novel	0.00967939	-0.0663552	chr1	+	99311561	99313026	MSTRG.1178.1	2	322	MSTRG.1178	NA
28150	i	novel	0.0631618	-0.110592	chr14	-	85652658	85655689	MSTRG.11780.1	1	3032	MSTRG.11780	NA
28154	i	novel	0.059743	-0.0004096	chr14	.	86634755	86635016	MSTRG.11783.1	1	262	MSTRG.11783	NA
28155	i	novel	0.019448	-0.0004096	chr14	.	86982140	86982406	MSTRG.11784.1	1	267	MSTRG.11784	NA
28163	i	novel	0.207855	-0.106496	chr14	-	87531596	87541278	MSTRG.11787.1	2	1512	MSTRG.11787	NA
28165	i	novel	0.0484402	-0.0086016	chr14	-	87538437	87541275	MSTRG.11787.2	2	2759	MSTRG.11787	NA
28164	i	novel	0.0333771	-0.049152	chr14	+	87531662	87538181	MSTRG.11788.1	1	6520	MSTRG.11788	NA
28166	i	novel	0.0416017	-0.045056	chr14	+	87550650	87554713	MSTRG.11789.1	1	4064	MSTRG.11789	NA
28167	i	novel	0.0928694	-0.0417792	chr14	+	87577677	87580626	MSTRG.11790.1	1	2950	MSTRG.11790	NA
28178	o	novel	0.0913533	-0.036864	chr14	+	87724122	87771341	MSTRG.11793.1	2	4914	MSTRG.11793	NA
28182	i	novel	0.0547771	-0.057344	chr14	+	87744033	87760771	MSTRG.11795.1	2	14077	MSTRG.11795	NA
28183	i	novel	0.127061	-0.004096	chr14	-	87754987	87769725	MSTRG.11796.1	1	14739	MSTRG.11796	NA
28184	i	novel	0.0275798	-0.114688	chr14	-	87785389	87788298	MSTRG.11797.1	1	2910	MSTRG.11797	NA
28185	i	novel	0.0936141	-0.0360448	chr14	-	87788557	87802803	MSTRG.11798.1	1	14247	MSTRG.11798	NA
28188	x	novel	0.0342781	-0.057344	chr14	-	87819664	87845378	MSTRG.11799.1	2	10908	MSTRG.11799	NA
248	i	novel	0.0821847	-0.0004096	chr1	.	6307827	6308106	MSTRG.118.1	1	280	MSTRG.118	NA
2639	u	novel	0.0243364	-0.0004096	chr1	.	99366788	99367150	MSTRG.1180.1	1	363	MSTRG.1180	NA
28189	i	novel	0.0588332	-0.08192	chr14	-	87872310	87874996	MSTRG.11800.1	1	2687	MSTRG.11800	NA
28207	u	novel	0.0770102	-0.02048	chr14	.	88176429	88176997	MSTRG.11806.1	1	569	MSTRG.11806	NA
28211	i	novel	0.0428737	-0.0004096	chr14	.	88260335	88260583	MSTRG.11809.1	1	249	MSTRG.11809	NA
28212	i	novel	0.0460975	-0.22528	chr14	.	88272404	88272640	MSTRG.11810.1	1	237	MSTRG.11810	NA
28215	u	novel	0.0309064	-0.0176128	chr14	.	88360790	88361073	MSTRG.11812.1	1	284	MSTRG.11812	NA
28217	u	novel	0.016471	-0.0004096	chr14	.	88385098	88385298	MSTRG.11814.1	1	201	MSTRG.11814	NA
28220	u	novel	0.00461436	-0.131891	chr14	.	88420113	88420486	MSTRG.11816.1	1	374	MSTRG.11816	NA
28221	j	novel	0.211471	-0.292864	chr14	-	88431277	88474005	MSTRG.11817.1	9	15618	MSTRG.11817	NA
28224	u	novel	0.251308	-0.0512	chr14	-	88464829	88473955	MSTRG.11817.3	2	3453	MSTRG.11817	NA
28223	i	novel	0.224048	-0.0069632	chr14	-	88438823	88451555	MSTRG.11818.1	1	12733	MSTRG.11818	NA
28236	i	novel	0.132485	-0.0294912	chr14	.	88911859	88913406	MSTRG.11820.1	1	1548	MSTRG.11820	NA
28239	i	novel	0.130197	-0.065536	chr14	+	88989388	88996592	MSTRG.11822.1	1	7205	MSTRG.11822	NA
28240	i	novel	0.0623382	-0.0815104	chr14	-	88989477	88996518	MSTRG.11823.1	2	4936	MSTRG.11823	NA
28241	i	novel	0.368372	-0.0241664	chr14	-	88997125	89021208	MSTRG.11824.1	1	24084	MSTRG.11824	NA
28242	i	novel	0.124393	-0.139264	chr14	-	89021490	89036514	MSTRG.11825.1	2	14576	MSTRG.11825	NA
28243	i	novel	0.28223	-0.0004096	chr14	-	89042885	89054227	MSTRG.11826.1	2	9053	MSTRG.11826	NA
28246	i	novel	0.0945079	-0.004096	chr14	-	89077057	89085045	MSTRG.11827.1	2	5810	MSTRG.11827	NA
28247	i	novel	0.105274	-0.196608	chr14	-	89077060	89081121	MSTRG.11827.2	2	2411	MSTRG.11827	NA
28252	x	novel	0.233545	-0.0733184	chr14	+	89141322	89151177	MSTRG.11829.1	2	1975	MSTRG.11829	NA
2643	i	novel	0.0659957	-0.0004096	chr1	.	99785668	99785921	MSTRG.1183.1	1	254	MSTRG.1183	NA
28253	i	novel	0.0814258	-0.0630784	chr14	.	89151484	89152152	MSTRG.11830.1	1	669	MSTRG.11830	NA
28254	i	novel	0.060296	-0.16384	chr14	.	89204601	89205720	MSTRG.11831.1	1	1120	MSTRG.11831	NA
28255	i	novel	0.0118653	-0.159744	chr14	.	89268927	89269378	MSTRG.11832.1	1	452	MSTRG.11832	NA
28264	i	novel	0.0670729	-0.0126976	chr14	-	89654941	89659225	MSTRG.11838.1	2	3626	MSTRG.11838	NA
28274	u	novel	0.0163868	-0.0004096	chr14	.	89998119	89998584	MSTRG.11840.1	1	466	MSTRG.11840	NA
28313	i	novel	0.0385283	-0.004096	chr14	-	90732363	90734358	MSTRG.11845.1	1	1996	MSTRG.11845	NA
28314	i	novel	0.0374089	-0.008192	chr14	-	90734733	90739841	MSTRG.11846.1	1	5109	MSTRG.11846	NA
28315	i	novel	0.210414	-0.004096	chr14	-	90798143	90801076	MSTRG.11847.1	1	2934	MSTRG.11847	NA
28329	u	novel	0.14404	-0.02048	chr14	.	91018874	91019089	MSTRG.11848.1	1	216	MSTRG.11848	NA
28291	i	novel	0.0246144	-0.0217088	chr14	.	90491847	90493294	MSTRG.11851.1	1	1448	MSTRG.11851	NA
28302	j	novel	0.173366	-0.04096	chr14	+	90512702	90553631	MSTRG.11853.1	9	5367	MSTRG.11853	NA
28345	i	novel	0.0518593	-0.077824	chr14	-	91121134	91122550	MSTRG.11858.1	1	1417	MSTRG.11858	NA
28354	u	novel	7.77339e-06	-0.016384	chr14	.	91606362	91606567	MSTRG.11860.1	1	206	MSTRG.11860	NA
28355	u	novel	0.0953817	-0.0004096	chr14	.	91659805	91660097	MSTRG.11861.1	1	293	MSTRG.11861	NA
28356	u	novel	0.0120015	-0.0004096	chr14	.	91889799	91890195	MSTRG.11863.1	1	397	MSTRG.11863	NA
28357	u	novel	0.0159415	-0.0925696	chr14	.	91970858	91971346	MSTRG.11864.1	1	489	MSTRG.11864	NA
28358	u	novel	0.0110925	-0.790528	chr14	.	91996938	91997337	MSTRG.11865.1	1	400	MSTRG.11865	NA
28363	u	novel	0.0666669	-0.0004096	chr14	.	92171248	92171458	MSTRG.11868.1	1	211	MSTRG.11868	NA
28374	j	novel	0.490187	-0.0761856	chr14	-	92296031	92330432	MSTRG.11871.1	7	2847	MSTRG.11871	NA
28382	i	novel	0.0177494	-0.0004096	chr14	.	92384807	92385854	MSTRG.11874.1	1	1048	MSTRG.11874	NA
28383	u	novel	0.0246322	-0.0004096	chr14	.	92574864	92575814	MSTRG.11875.1	1	951	MSTRG.11875	NA
28384	u	novel	0.0049933	-0.086016	chr14	.	92584387	92584587	MSTRG.11876.1	1	201	MSTRG.11876	NA
28389	u	novel	0.0200307	-0.0004096	chr14	.	93933746	93933956	MSTRG.11877.1	1	211	MSTRG.11877	NA
28392	i	novel	0.00896673	-0.118784	chr14	.	94102069	94103509	MSTRG.11879.1	1	1441	MSTRG.11879	NA
28393	i	novel	0.0229333	-0.0004096	chr14	.	94106183	94106658	MSTRG.11880.1	1	476	MSTRG.11880	NA
28402	u	novel	0.0631205	-0.14336	chr14	+	95682540	95688395	MSTRG.11882.1	2	5828	MSTRG.11882	NA
28403	u	novel	0.0977617	-0.0393216	chr14	-	95820443	95825005	MSTRG.11883.1	1	4563	MSTRG.11883	NA
28405	x	novel	0.108058	-0.0032768	chr14	-	96328662	96424641	MSTRG.11884.1	5	6278	MSTRG.11884	NA
28407	u	novel	0.161946	-0.0004096	chr14	-	96439290	96445788	MSTRG.11886.1	3	2380	MSTRG.11886	NA
28408	u	novel	0.0360821	-0.08192	chr14	.	96446348	96449332	MSTRG.11887.1	1	2985	MSTRG.11887	NA
28409	u	novel	0.0514818	-0.069632	chr14	.	96467232	96469417	MSTRG.11888.1	1	2186	MSTRG.11888	NA
28410	u	novel	0.0131343	-0.0004096	chr14	.	96498677	96498892	MSTRG.11889.1	1	216	MSTRG.11889	NA
28411	u	novel	0.0126651	-0.0004096	chr14	.	96502757	96503597	MSTRG.11890.1	1	841	MSTRG.11890	NA
28412	u	novel	0.100137	-0.053248	chr14	.	96510695	96513830	MSTRG.11891.1	1	3136	MSTRG.11891	NA
28415	i	novel	0.0241828	-0.0004096	chr14	.	96665851	96666362	MSTRG.11893.1	1	512	MSTRG.11893	NA
28416	i	novel	0.0158946	-0.0004096	chr14	.	96683591	96684360	MSTRG.11894.1	1	770	MSTRG.11894	NA
28417	i	novel	0.0472571	-0.0004096	chr14	.	96704410	96704889	MSTRG.11895.1	1	480	MSTRG.11895	NA
28418	i	novel	0.0294626	-0.0098304	chr14	.	96727093	96728656	MSTRG.11896.1	1	1564	MSTRG.11896	NA
28419	i	novel	0.0494253	-0.0053248	chr14	.	96734073	96739536	MSTRG.11897.1	1	5464	MSTRG.11897	NA
28420	i	novel	0.0463323	-0.118784	chr14	.	96750070	96762042	MSTRG.11898.1	1	11973	MSTRG.11898	NA
28421	i	novel	0.406435	-0.016384	chr14	.	96765834	96786782	MSTRG.11899.1	1	20949	MSTRG.11899	NA
249	i	novel	0.0102102	-0.0004096	chr1	.	6315651	6316024	MSTRG.119.1	1	374	MSTRG.119	NA
28422	i	novel	0.029914	-0.02048	chr14	.	96795679	96801558	MSTRG.11900.1	1	5880	MSTRG.11900	NA
28423	i	novel	0.325577	-0.02048	chr14	.	96801862	96820252	MSTRG.11901.1	1	18391	MSTRG.11901	NA
28429	i	novel	0.029863	-0.0098304	chr14	+	97628090	97630144	MSTRG.11903.1	1	2055	MSTRG.11903	NA
28431	i	novel	0.054189	-0.024576	chr14	-	97884323	97894755	MSTRG.11905.1	2	10407	MSTRG.11905	NA
28432	i	novel	0.101676	-0.0065536	chr14	+	98060053	98084460	MSTRG.11906.1	1	24408	MSTRG.11906	NA
28433	i	novel	0.0398768	-0.004096	chr14	+	98086075	98088664	MSTRG.11907.1	1	2590	MSTRG.11907	NA
28434	i	novel	0.170061	-0.0520192	chr14	-	98094116	98104749	MSTRG.11908.1	2	10381	MSTRG.11908	NA
28437	i	novel	0.048569	-0.069632	chr14	-	98119290	98127433	MSTRG.11910.1	2	6058	MSTRG.11910	NA
28438	i	novel	0.382972	-0.0221184	chr14	+	98127506	98152190	MSTRG.11911.1	2	24653	MSTRG.11911	NA
28441	i	novel	0.106812	-0.0008192	chr14	+	98145205	98165667	MSTRG.11911.2	2	20433	MSTRG.11911	NA
28442	i	novel	0.106812	-0.0008192	chr14	+	98155122	98169421	MSTRG.11911.3	2	14266	MSTRG.11911	NA
28439	i	novel	0.0518261	-0.045056	chr14	-	98127507	98139518	MSTRG.11912.1	2	10962	MSTRG.11912	NA
28440	i	novel	0.0381755	-0.016384	chr14	-	98142372	98152102	MSTRG.11913.1	2	4793	MSTRG.11913	NA
28443	i	novel	0.0779518	-0.032768	chr14	+	98182724	98189675	MSTRG.11914.1	1	6952	MSTRG.11914	NA
28444	i	novel	0.080836	-0.02048	chr14	+	98182746	98189667	MSTRG.11914.2	2	6173	MSTRG.11914	NA
28445	i	novel	0.0993677	-0.103219	chr14	-	98186524	98222079	MSTRG.11915.1	2	17163	MSTRG.11915	NA
28447	i	novel	0.104288	-0.103219	chr14	-	98204898	98208407	MSTRG.11915.2	2	3482	MSTRG.11915	NA
28446	i	novel	0.455498	-0.0016384	chr14	+	98190163	98208042	MSTRG.11916.1	1	17880	MSTRG.11916	NA
28448	i	novel	0.0449753	-0.094208	chr14	+	98222393	98303305	MSTRG.11917.1	2	7602	MSTRG.11917	NA
28449	i	novel	0.0867681	-0.0057344	chr14	+	98222637	98302211	MSTRG.11917.2	3	21476	MSTRG.11917	NA
28450	i	novel	0.184882	-0.032768	chr14	-	98247976	98317970	MSTRG.11918.1	2	31692	MSTRG.11918	NA
28451	i	novel	0.0728634	-0.159744	chr14	+	98304977	98306931	MSTRG.11919.1	1	1955	MSTRG.11919	NA
28452	i	novel	0.00977922	-0.057344	chr14	+	98320754	98322978	MSTRG.11920.1	1	2225	MSTRG.11920	NA
28453	i	novel	0.02061	-0.167936	chr14	.	98324702	98327232	MSTRG.11921.1	1	2531	MSTRG.11921	NA
28454	i	novel	0.00929243	-0.0004096	chr14	.	98447456	98447946	MSTRG.11922.1	1	491	MSTRG.11922	NA
28455	x	novel	0.114863	-0.0438272	chr14	+	98449736	98662657	MSTRG.11923.1	3	46633	MSTRG.11923	NA
28456	i	novel	0.0448025	-0.0438272	chr14	+	98480551	98483777	MSTRG.11923.2	2	3205	MSTRG.11923	NA
28457	i	novel	0.0648558	-0.0167936	chr14	-	98484195	98495990	MSTRG.11924.1	2	11772	MSTRG.11924	NA
28459	i	novel	0.172333	-0.016384	chr14	+	98504997	98541076	MSTRG.11925.1	2	36060	MSTRG.11925	NA
28460	i	novel	0.156704	-0.073728	chr14	+	98541877	98573357	MSTRG.11926.1	1	31481	MSTRG.11926	NA
28461	i	novel	0.0938398	-0.012288	chr14	-	98545152	98571781	MSTRG.11927.1	2	26604	MSTRG.11927	NA
28463	i	novel	0.078311	-0.069632	chr14	+	98593674	98615930	MSTRG.11928.1	1	22257	MSTRG.11928	NA
28464	i	novel	0.0566851	-0.090112	chr14	+	98680488	98690587	MSTRG.11929.1	1	10100	MSTRG.11929	NA
28476	i	novel	0.126398	-0.028672	chr14	-	99207241	99208119	MSTRG.11931.1	2	855	MSTRG.11931	NA
28477	o	novel	0.0542649	-0.028672	chr14	-	99207241	99289655	MSTRG.11931.2	2	2771	MSTRG.11931	NA
28480	i	novel	0.0758874	-0.03072	chr14	+	99265133	99275514	MSTRG.11933.1	1	10382	MSTRG.11933	NA
28481	u	novel	0.076896	-0.0487424	chr14	+	99327633	99348741	MSTRG.11934.1	1	21109	MSTRG.11934	NA
28513	i	novel	0.0487358	-0.136806	chr14	-	99959485	99962310	MSTRG.11939.1	1	2826	MSTRG.11939	NA
2682	i	novel	0.0225971	-0.065536	chr1	-	100526817	100528416	MSTRG.1194.1	1	1600	MSTRG.1194	NA
28491	x	novel	0.0663567	-0.032768	chr14	-	99678534	99736083	MSTRG.11943.1	2	10193	MSTRG.11943	NA
28496	i	novel	0.160105	-0.0110592	chr14	-	99739265	99754363	MSTRG.11945.1	2	15018	MSTRG.11945	NA
28498	i	novel	0.160105	-0.0110592	chr14	-	99743938	99753996	MSTRG.11945.2	1	10059	MSTRG.11945	NA
28500	i	novel	0.0922449	-0.012288	chr14	+	99763589	99771118	MSTRG.11946.1	2	7105	MSTRG.11946	NA
2683	i	novel	0.0846898	-0.049152	chr1	-	100536021	100537758	MSTRG.1195.1	2	1437	MSTRG.1195	NA
28517	i	novel	0.00598449	-0.12288	chr14	.	100524552	100524991	MSTRG.11952.1	1	440	MSTRG.11952	NA
28518	i	novel	0.00702824	-0.0851968	chr14	.	100535605	100535963	MSTRG.11953.1	1	359	MSTRG.11953	NA
28519	i	novel	0.0180632	-0.0004096	chr14	.	100536322	100537335	MSTRG.11954.1	1	1014	MSTRG.11954	NA
28520	i	novel	0.0149661	-0.0004096	chr14	.	100538784	100539199	MSTRG.11955.1	1	416	MSTRG.11955	NA
28521	i	novel	0.0395071	-0.012288	chr14	.	100562388	100563111	MSTRG.11956.1	1	724	MSTRG.11956	NA
2684	i	novel	0.0688398	-0.02048	chr1	.	100537831	100540755	MSTRG.1196.1	1	2925	MSTRG.1196	NA
28538	j	novel	0.193085	-0.106496	chr14	-	101119982	101125593	MSTRG.11963.1	3	2602	MSTRG.11963	NA
28568	i	novel	0.359162	-0.1024	chr14	+	101462293	101467979	MSTRG.11968.1	1	5687	MSTRG.11968	NA
28569	i	novel	0.0182957	-0.0004096	chr14	-	101468695	101471161	MSTRG.11969.1	2	1544	MSTRG.11969	NA
28588	i	novel	0.153433	-0.0528384	chr14	-	102846099	102866419	MSTRG.11974.1	3	11556	MSTRG.11974	NA
28589	i	novel	0.0311741	-0.004096	chr14	-	102846154	102852324	MSTRG.11974.2	2	5123	MSTRG.11974	NA
28590	x	novel	0.0383643	-0.0188416	chr14	-	102866584	102902892	MSTRG.11975.1	2	2408	MSTRG.11975	NA
28595	i	novel	0.0830619	-0.0495616	chr14	+	102894513	102903823	MSTRG.11976.1	2	4508	MSTRG.11976	NA
28597	i	novel	0.0342781	-0.04096	chr14	+	103156881	103157768	MSTRG.11978.1	1	888	MSTRG.11978	NA
2686	i	novel	0.0294489	-0.086016	chr1	.	100567520	100568531	MSTRG.1198.1	1	1012	MSTRG.1198	NA
28607	x	novel	0.105461	-0.098304	chr14	-	103433862	103442620	MSTRG.11982.1	2	2409	MSTRG.11982	NA
28618	i	novel	0.0160364	-0.08192	chr14	-	103580279	103583069	MSTRG.11984.1	2	2487	MSTRG.11984	NA
28619	x	novel	0.223132	-0.004096	chr14	-	103581155	103660690	MSTRG.11985.1	2	5025	MSTRG.11985	NA
28626	i	novel	0.0325742	-0.004096	chr14	.	103689416	103689881	MSTRG.11988.1	1	466	MSTRG.11988	NA
28627	i	novel	0.00724195	-0.186368	chr14	.	103706364	103707209	MSTRG.11989.1	1	846	MSTRG.11989	NA
2694	i	novel	0.0145643	-0.0200704	chr1	-	100606619	100610148	MSTRG.1199.1	1	3530	MSTRG.1199	NA
28628	i	novel	0.0477041	-0.053248	chr14	.	103725819	103726239	MSTRG.11990.1	1	421	MSTRG.11990	NA
28629	i	novel	0.0353396	-0.053248	chr14	-	103729093	103729455	MSTRG.11991.1	1	363	MSTRG.11991	NA
28630	i	novel	0.0366326	-0.0004096	chr14	.	103734573	103734964	MSTRG.11992.1	1	392	MSTRG.11992	NA
28631	i	novel	0.0536548	-0.02048	chr14	.	103736761	103739045	MSTRG.11993.1	1	2285	MSTRG.11993	NA
28632	i	novel	0.0251376	-0.04096	chr14	.	103742454	103742926	MSTRG.11994.1	1	473	MSTRG.11994	NA
28633	i	novel	0.0204348	-0.0004096	chr14	-	103745519	103747573	MSTRG.11995.1	2	653	MSTRG.11995	NA
28634	i	novel	0.00600687	-0.0004096	chr14	.	103748929	103749318	MSTRG.11996.1	1	390	MSTRG.11996	NA
28635	i	novel	0.0184155	-0.0004096	chr14	.	103751850	103752203	MSTRG.11997.1	1	354	MSTRG.11997	NA
28636	i	novel	0.0246452	-0.0004096	chr14	.	103771317	103771758	MSTRG.11998.1	1	442	MSTRG.11998	NA
28637	i	novel	0.067428	-0.047104	chr14	.	103787043	103787608	MSTRG.11999.1	1	566	MSTRG.11999	NA
250	i	novel	0.0239848	-0.0004096	chr1	.	6318839	6319223	MSTRG.120.1	1	385	MSTRG.120	NA
28638	i	novel	0.0776294	-0.118784	chr14	.	103790885	103792151	MSTRG.12000.1	1	1267	MSTRG.12000	NA
28639	i	novel	0.0192386	-0.12288	chr14	.	103799923	103800329	MSTRG.12001.1	1	407	MSTRG.12001	NA
28640	i	novel	0.0175258	-0.024576	chr14	.	103806435	103807807	MSTRG.12002.1	1	1373	MSTRG.12002	NA
28642	i	novel	0.0909775	-0.06144	chr14	.	103812461	103813243	MSTRG.12004.1	1	783	MSTRG.12004	NA
28643	i	novel	0.0240946	-0.0405504	chr14	.	103824100	103826972	MSTRG.12005.1	1	2873	MSTRG.12005	NA
28644	i	novel	0.052774	-0.045056	chr14	.	103828280	103829155	MSTRG.12006.1	1	876	MSTRG.12006	NA
28645	i	novel	0.155499	-0.0004096	chr14	.	103831383	103831711	MSTRG.12007.1	1	329	MSTRG.12007	NA
28646	j	novel	0.107068	-0.0434176	chr14	+	103871308	103916952	MSTRG.12008.1	4	3955	MSTRG.12008	NA
2697	u	novel	0.00576748	-0.0004096	chr1	-	101175924	101238087	MSTRG.1201.1	2	211	MSTRG.1201	NA
28651	i	novel	0.0131038	-0.094208	chr14	+	104094221	104101335	MSTRG.12010.1	2	1395	MSTRG.12010	NA
28653	u	novel	0.0348331	-0.0004096	chr14	.	104190969	104191570	MSTRG.12012.1	1	602	MSTRG.12012	NA
28654	u	novel	0.00359082	-0.0004096	chr14	.	104191909	104192146	MSTRG.12013.1	1	238	MSTRG.12013	NA
28656	u	novel	0.0932293	-0.0004096	chr14	.	104219233	104219826	MSTRG.12015.1	1	594	MSTRG.12015	NA
28661	i	novel	0.0204079	-0.0004096	chr14	.	104411437	104411821	MSTRG.12017.1	1	385	MSTRG.12017	NA
28662	i	novel	0.01849	-0.233472	chr14	.	104432568	104432989	MSTRG.12018.1	1	422	MSTRG.12018	NA
28663	i	novel	0.0034546	-0.0004096	chr14	.	104522967	104523279	MSTRG.12019.1	1	313	MSTRG.12019	NA
28664	i	novel	0.0153257	-0.0004096	chr14	.	104536229	104536681	MSTRG.12020.1	1	453	MSTRG.12020	NA
28684	i	novel	0.0299061	-0.0004096	chr14	.	104961048	104961591	MSTRG.12022.1	1	544	MSTRG.12022	NA
28685	i	novel	0.225123	-0.016384	chr14	.	104970424	104971331	MSTRG.12023.1	1	908	MSTRG.12023	NA
28686	i	novel	0.0625289	-0.028672	chr14	.	104972410	104972848	MSTRG.12024.1	1	439	MSTRG.12024	NA
28679	i	novel	0.149454	-0.032768	chr14	-	104886680	104890873	MSTRG.12026.1	2	3448	MSTRG.12026	NA
28680	x	novel	0.0448914	-0.0237568	chr14	+	104889854	104937839	MSTRG.12027.1	2	1330	MSTRG.12027	NA
28692	o	novel	0.0265044	-0.180224	chr14	+	105103276	105159265	MSTRG.12031.1	2	1497	MSTRG.12031	NA
28698	i	novel	0.44067	-0.0323584	chr14	+	105153792	105158128	MSTRG.12031.2	2	1241	MSTRG.12031	NA
28697	o	novel	0.123328	-0.0004096	chr14	-	105129732	105153729	MSTRG.12033.1	2	4459	MSTRG.12033	NA
28699	i	novel	0.00377715	-0.0004096	chr14	.	105165012	105165271	MSTRG.12034.1	1	260	MSTRG.12034	NA
28739	i	novel	0.00862019	-0.057344	chr14	.	106119005	106119253	MSTRG.12039.1	1	249	MSTRG.12039	NA
2716	u	novel	0.151574	-0.0069632	chr1	.	103949658	103949929	MSTRG.1204.1	1	272	MSTRG.1204	NA
28746	i	novel	0.0592607	-0.0004096	chr14	.	106226616	106226854	MSTRG.12041.1	1	239	MSTRG.12041	NA
28760	j	novel	0.0346759	-0.028672	chr14	-	106696742	106736475	MSTRG.12046.2	5	4783	MSTRG.12046	NA
28761	j	novel	0.0168897	-0.028672	chr14	-	106696743	106736298	MSTRG.12046.3	6	1327	MSTRG.12046	NA
28763	j	novel	0.294568	-0.028672	chr14	-	106702388	106736792	MSTRG.12046.4	5	11910	MSTRG.12046	NA
28767	j	novel	0.123309	-0.038912	chr14	-	106761679	106778229	MSTRG.12048.2	3	10374	MSTRG.12048	NA
28716	i	novel	0.149758	-0.0684032	chr14	-	105780010	105786148	MSTRG.12052.1	1	6139	MSTRG.12052	NA
28724	i	novel	0.0729397	-0.06144	chr14	+	105836883	105849687	MSTRG.12055.1	2	1916	MSTRG.12055	NA
28725	i	novel	0.0878909	-0.012288	chr14	-	105837020	105847669	MSTRG.12056.1	1	10650	MSTRG.12056	NA
28726	o	novel	0.0795187	-0.012288	chr14	+	105838159	105887894	MSTRG.12057.1	2	6616	MSTRG.12057	NA
28727	i	novel	0.0581266	-0.098304	chr14	-	105849883	105859534	MSTRG.12058.1	2	8798	MSTRG.12058	NA
28728	i	novel	0.0344026	-0.0147456	chr14	+	105849883	105860757	MSTRG.12059.1	2	10021	MSTRG.12059	NA
28729	i	novel	0.0685086	-0.077824	chr14	.	105868822	105870419	MSTRG.12060.1	1	1598	MSTRG.12060	NA
28733	i	novel	0.0342587	-0.146227	chr14	.	105949639	105951069	MSTRG.12063.1	1	1431	MSTRG.12063	NA
28734	i	novel	0.00728563	-0.0004096	chr14	.	105952657	105953195	MSTRG.12064.1	1	539	MSTRG.12064	NA
28735	i	novel	0.0186073	-0.0004096	chr14	.	105963941	105964183	MSTRG.12065.1	1	243	MSTRG.12065	NA
28784	i	novel	0.10826	-0.0004096	chr14	+	106937922	106939837	MSTRG.12067.1	1	1916	MSTRG.12067	NA
28786	i	novel	0.0333112	-0.02048	chr14	+	106946959	106947631	MSTRG.12068.1	1	673	MSTRG.12068	NA
28790	i	novel	0.133732	-0.0827392	chr14	+	107003456	107009517	MSTRG.12069.1	2	5313	MSTRG.12069	NA
28792	i	novel	0.232391	-0.07168	chr14	+	107053898	107064738	MSTRG.12070.1	1	10841	MSTRG.12070	NA
28793	i	novel	0.0549534	-0.1024	chr14	+	107067617	107068590	MSTRG.12071.1	1	974	MSTRG.12071	NA
28794	i	novel	0.0697024	-0.0512	chr14	+	107081763	107089651	MSTRG.12072.1	1	7889	MSTRG.12072	NA
28800	o	novel	0.077927	-0.012288	chr14	-	107229761	107268913	MSTRG.12075.1	2	1499	MSTRG.12075	NA
28804	o	novel	0.106432	-0.036864	chr14	-	107261013	107267259	MSTRG.12075.2	2	3110	MSTRG.12075	NA
28803	i	novel	0.0214805	-0.077824	chr14	+	107249609	107251173	MSTRG.12076.1	1	1565	MSTRG.12076	NA
28811	i	novel	0.118709	-0.077824	chr14	-	107287794	107291331	MSTRG.12078.1	2	3063	MSTRG.12078	NA
28818	i	novel	0.0612123	-0.0221184	chr14	+	107304848	107317997	MSTRG.12079.1	2	7889	MSTRG.12079	NA
28819	i	novel	0.270037	-0.004096	chr14	+	107304939	107317000	MSTRG.12079.2	2	6285	MSTRG.12079	NA
28820	i	novel	0.245871	-0.0806912	chr14	-	107310091	107318008	MSTRG.12080.1	1	7918	MSTRG.12080	NA
28835	u	novel	0.0387059	-0.0004096	chr14	.	107470406	107470733	MSTRG.12084.1	1	328	MSTRG.12084	NA
28836	u	novel	0.146451	-0.0004096	chr14	+	107495398	107495998	MSTRG.12085.1	2	222	MSTRG.12085	NA
28839	o	novel	0.064708	-0.024576	chr14	+	107561388	107607328	MSTRG.12087.1	2	3203	MSTRG.12087	NA
28840	u	novel	0.0417891	-0.02048	chr14	+	107590951	107607239	MSTRG.12087.2	3	7963	MSTRG.12087	NA
28841	u	novel	0.0653055	-0.024576	chr14	+	107598280	107607926	MSTRG.12087.3	2	3792	MSTRG.12087	NA
28842	u	novel	0.038247	-0.0065536	chr14	-	107598305	107607926	MSTRG.12088.1	1	9622	MSTRG.12088	NA
28845	i	novel	0.0193518	-0.110592	chr14	.	107681879	107682807	MSTRG.12091.1	1	929	MSTRG.12091	NA
28854	x	novel	0.0231878	-0.09216	chr14	+	107951558	108070619	MSTRG.12093.1	3	1713	MSTRG.12093	NA
28866	i	novel	0.113119	-0.0004096	chr14	.	108259966	108260254	MSTRG.12097.1	1	289	MSTRG.12097	NA
28867	i	novel	0.0153175	-0.0004096	chr14	.	108283176	108283491	MSTRG.12098.1	1	316	MSTRG.12098	NA
251	i	novel	0.00272168	-0.0004096	chr1	.	6325323	6325597	MSTRG.121.1	1	275	MSTRG.121	NA
28877	i	novel	0.0663896	-0.0356352	chr14	-	108305651	108318800	MSTRG.12100.1	1	13150	MSTRG.12100	NA
28881	u	novel	0.0382741	-0.012288	chr14	-	108438096	108443690	MSTRG.12103.1	1	5595	MSTRG.12103	NA
28891	i	novel	0.0257212	-0.053248	chr14	-	108737769	108738409	MSTRG.12104.6	1	641	MSTRG.12104	NA
28889	i	novel	0.114561	-0.0004096	chr14	.	108674943	108675262	MSTRG.12105.1	1	320	MSTRG.12105	NA
28890	i	novel	0.0174979	-0.0815104	chr14	.	108675799	108676108	MSTRG.12106.1	1	310	MSTRG.12106	NA
2746	i	novel	0.0236852	-0.1024	chr1	+	104829037	104832791	MSTRG.1211.1	1	3755	MSTRG.1211	NA
2747	i	novel	0.146445	-0.034816	chr1	+	104829037	104835871	MSTRG.1211.2	2	6764	MSTRG.1211	NA
28912	i	novel	0.190364	-0.0512	chr14	+	108887762	108906234	MSTRG.12119.1	2	9587	MSTRG.12119	NA
2749	i	novel	0.0569085	-0.1024	chr1	+	104850240	104855462	MSTRG.1212.1	1	5223	MSTRG.1212	NA
28913	i	novel	0.133568	-0.03072	chr14	-	108887777	108898267	MSTRG.12120.1	1	10491	MSTRG.12120	NA
28914	i	novel	0.153162	-0.03072	chr14	.	108899556	108902706	MSTRG.12121.1	1	3151	MSTRG.12121	NA
28935	i	novel	0.138306	-0.0344064	chr14	-	109113463	109118028	MSTRG.12123.1	2	3844	MSTRG.12123	NA
28937	i	novel	0.104136	-0.0004096	chr14	.	109121470	109122004	MSTRG.12125.1	1	535	MSTRG.12125	NA
28938	i	novel	0.0108055	-0.012288	chr14	.	109127161	109127658	MSTRG.12126.1	1	498	MSTRG.12126	NA
28939	i	novel	0.0261528	-0.0323584	chr14	.	109129581	109131324	MSTRG.12127.1	1	1744	MSTRG.12127	NA
28940	i	novel	0.055285	-0.045056	chr14	.	109153870	109154758	MSTRG.12128.1	1	889	MSTRG.12128	NA
28941	u	novel	0.0122917	-0.028672	chr14	.	109185666	109185944	MSTRG.12129.1	1	279	MSTRG.12129	NA
2750	i	novel	0.314508	-0.0004096	chr1	+	104867105	104891528	MSTRG.1213.1	2	3899	MSTRG.1213	NA
28954	i	novel	0.181131	-0.045056	chr14	-	109539701	109544143	MSTRG.12133.1	1	4443	MSTRG.12133	NA
28955	i	novel	0.00474496	-0.0004096	chr14	+	109544413	109546370	MSTRG.12134.1	2	815	MSTRG.12134	NA
28969	i	novel	0.00698322	-0.0004096	chr14	.	110249202	110249583	MSTRG.12139.1	1	382	MSTRG.12139	NA
2751	i	novel	0.0470589	-0.08192	chr1	+	104869812	104876449	MSTRG.1214.1	1	6638	MSTRG.1214	NA
28970	i	novel	0.0150933	-0.0004096	chr14	.	110250615	110250894	MSTRG.12140.1	1	280	MSTRG.12140	NA
28971	i	novel	0.0228992	-0.0004096	chr14	.	110281027	110281278	MSTRG.12141.1	1	252	MSTRG.12141	NA
28972	i	novel	0.156048	-0.0004096	chr14	.	110286037	110286650	MSTRG.12142.1	1	614	MSTRG.12142	NA
28974	i	novel	0.0422812	-0.032768	chr14	.	110301406	110301885	MSTRG.12144.1	1	480	MSTRG.12144	NA
28975	i	novel	0.020553	-0.1024	chr14	.	110327865	110330409	MSTRG.12145.1	1	2545	MSTRG.12145	NA
28976	i	novel	0.0132325	-0.0004096	chr14	.	110338276	110338886	MSTRG.12146.1	1	611	MSTRG.12146	NA
28979	i	novel	0.0249701	-0.0028672	chr14	.	110372672	110372942	MSTRG.12149.1	1	271	MSTRG.12149	NA
2752	i	novel	0.226555	-0.045056	chr1	+	104924691	104948911	MSTRG.1215.1	1	24221	MSTRG.1215	NA
28981	i	novel	0.318227	-0.0004096	chr14	.	110388739	110389430	MSTRG.12151.1	1	692	MSTRG.12151	NA
28982	i	novel	0.02429	-0.0004096	chr14	.	110390005	110390544	MSTRG.12152.1	1	540	MSTRG.12152	NA
28983	i	novel	0.00453423	-0.0004096	chr14	.	110451889	110452170	MSTRG.12153.1	1	282	MSTRG.12153	NA
28989	i	novel	0.0849297	-0.0405504	chr14	.	110585421	110586323	MSTRG.12156.1	1	903	MSTRG.12156	NA
28997	u	novel	0.143778	-0.0299008	chr14	.	110806092	110809696	MSTRG.12159.1	1	3605	MSTRG.12159	NA
2753	i	novel	0.0252427	-0.18432	chr1	+	104964822	104969427	MSTRG.1216.1	1	4606	MSTRG.1216	NA
28998	u	novel	0.347568	-0.0004096	chr14	.	110818138	110818424	MSTRG.12160.1	1	287	MSTRG.12160	NA
29020	i	novel	0.353259	-0.0098304	chr14	+	111094853	111105571	MSTRG.12168.1	1	10719	MSTRG.12168	NA
29021	i	novel	0.0130267	-0.0004096	chr14	-	111105699	111108374	MSTRG.12169.1	2	708	MSTRG.12169	NA
2754	i	novel	0.0810333	-0.0135168	chr1	+	104981258	104995653	MSTRG.1217.1	1	14396	MSTRG.1217	NA
29034	i	novel	0.0104995	-0.118784	chr14	-	111327735	111328040	MSTRG.12173.1	1	306	MSTRG.12173	NA
29035	i	novel	0.301309	-0.0004096	chr14	.	111338588	111339696	MSTRG.12174.1	1	1109	MSTRG.12174	NA
29036	x	novel	0.243958	-0.008192	chr14	+	111346027	111368724	MSTRG.12175.1	2	1309	MSTRG.12175	NA
29039	x	novel	0.480452	-0.016384	chr14	+	111365849	111454739	MSTRG.12178.1	2	1130	MSTRG.12178	NA
2755	i	novel	0.0643476	-0.053248	chr1	+	105001717	105006845	MSTRG.1218.1	1	5129	MSTRG.1218	NA
29053	i	novel	0.0127734	-0.0004096	chr14	.	111606220	111606681	MSTRG.12183.1	1	462	MSTRG.12183	NA
29054	i	novel	0.0757835	-0.065536	chr14	.	111616727	111619661	MSTRG.12184.1	1	2935	MSTRG.12184	NA
29055	u	novel	0.014463	-0.0004096	chr14	.	111622183	111622916	MSTRG.12185.1	1	734	MSTRG.12185	NA
29113	i	novel	0.229111	-0.036864	chr14	-	112403279	112404312	MSTRG.12188.1	1	1034	MSTRG.12188	NA
29114	i	novel	0.105037	-0.024576	chr14	-	112407992	112411370	MSTRG.12189.1	1	3379	MSTRG.12189	NA
2756	x	novel	0.052253	-0.012288	chr1	+	105011864	105087679	MSTRG.1219.1	2	29301	MSTRG.1219	NA
29115	i	novel	0.0578381	-0.024576	chr14	+	112413179	112429956	MSTRG.12190.1	2	5765	MSTRG.12190	NA
29116	i	novel	0.0488698	-0.0065536	chr14	+	112419782	112424440	MSTRG.12191.1	2	3885	MSTRG.12191	NA
29117	i	novel	0.143415	-0.0028672	chr14	+	112432466	112438989	MSTRG.12192.1	2	4961	MSTRG.12192	NA
29118	i	novel	0.0827079	-0.0237568	chr14	+	112462562	112474263	MSTRG.12193.1	3	6045	MSTRG.12193	NA
29119	i	novel	0.375007	-0.053248	chr14	-	112464178	112477878	MSTRG.12194.1	2	12979	MSTRG.12194	NA
29121	i	novel	0.178381	-0.0241664	chr14	.	112610463	112610751	MSTRG.12196.1	1	289	MSTRG.12196	NA
29125	j	novel	0.12203	-0.0438272	chr14	-	112638205	112707503	MSTRG.12198.2	3	4115	MSTRG.12198	NA
29127	i	novel	0.00898087	-0.0004096	chr14	.	112666343	112666643	MSTRG.12199.1	1	301	MSTRG.12199	NA
252	i	novel	0.0272134	-0.077824	chr1	.	6327794	6328033	MSTRG.122.1	1	240	MSTRG.122	NA
29128	i	novel	0.167188	-0.0528384	chr14	+	112670756	112680875	MSTRG.12200.1	1	10120	MSTRG.12200	NA
29130	i	novel	0.0131534	-0.0004096	chr14	-	112690311	112690632	MSTRG.12201.1	1	322	MSTRG.12201	NA
29131	i	novel	0.0400802	-0.0139264	chr14	-	112730815	112734885	MSTRG.12202.1	2	3672	MSTRG.12202	NA
29132	u	novel	0.0140667	-0.132301	chr14	.	112743338	112743848	MSTRG.12203.1	1	511	MSTRG.12203	NA
29133	u	novel	0.0192224	-0.0004096	chr14	.	112745571	112745777	MSTRG.12204.1	1	207	MSTRG.12204	NA
29134	u	novel	0.0313503	-0.0229376	chr14	.	112746268	112747451	MSTRG.12205.1	1	1184	MSTRG.12205	NA
29058	u	novel	0.0878314	-0.217088	chr14	+	111633601	111635484	MSTRG.12207.1	2	1781	MSTRG.12207	NA
29059	u	novel	0.0834006	-0.0282624	chr14	.	111635768	111636119	MSTRG.12208.1	1	352	MSTRG.12208	NA
2763	o	novel	0.0171675	-0.0004096	chr1	+	105994160	106029794	MSTRG.1221.1	2	850	MSTRG.1221	NA
29078	x	novel	0.0317553	-0.0155648	chr14	-	112017304	112029851	MSTRG.12214.1	2	886	MSTRG.12214	NA
29079	i	novel	0.0832188	-0.0188416	chr14	+	112017744	112020525	MSTRG.12215.1	2	2572	MSTRG.12215	NA
2764	i	novel	0.0168796	-0.094208	chr1	+	105997465	105998167	MSTRG.1222.1	1	703	MSTRG.1222	NA
29154	i	novel	0.152255	-0.004096	chr14	+	112827458	112829292	MSTRG.12223.1	1	1835	MSTRG.12223	NA
29155	i	novel	0.165262	-0.0401408	chr14	+	112840482	112841487	MSTRG.12224.1	1	1006	MSTRG.12224	NA
29160	i	novel	0.0222814	-0.073728	chr14	.	112861903	112862870	MSTRG.12227.1	1	968	MSTRG.12227	NA
29161	i	novel	0.358529	-0.077824	chr14	.	112865485	112866818	MSTRG.12228.1	1	1334	MSTRG.12228	NA
29166	i	novel	0.0114649	-0.0151552	chr14	+	112891721	112893345	MSTRG.12231.1	1	1625	MSTRG.12231	NA
29167	i	novel	0.0746616	-0.0290816	chr14	.	112907935	112915173	MSTRG.12232.1	1	7239	MSTRG.12232	NA
29168	i	novel	0.298627	-0.065536	chr14	.	112916223	112920165	MSTRG.12233.1	1	3943	MSTRG.12233	NA
29169	i	novel	0.0217777	-0.032768	chr14	.	112920750	112921907	MSTRG.12234.1	1	1158	MSTRG.12234	NA
29173	x	novel	0.0743159	-0.0004096	chr14	+	113059850	113074269	MSTRG.12235.1	2	870	MSTRG.12235	NA
2777	j	novel	0.165011	-0.0466944	chr1	-	106878081	106885051	MSTRG.1224.3	3	4559	MSTRG.1224	NA
29196	i	novel	0.179422	-0.0483328	chr14	-	113273611	113276678	MSTRG.12242.1	2	2234	MSTRG.12242	NA
29198	i	novel	0.0225834	-0.135168	chr14	-	113288564	113297175	MSTRG.12243.1	2	1402	MSTRG.12243	NA
29199	i	novel	0.0294619	-0.036864	chr14	+	113300307	113317104	MSTRG.12244.1	3	1774	MSTRG.12244	NA
29200	i	novel	0.0227383	-0.016384	chr14	-	113300330	113301650	MSTRG.12245.1	1	1321	MSTRG.12245	NA
29201	i	novel	0.246987	-0.0131072	chr14	-	113301904	113307126	MSTRG.12246.1	2	4522	MSTRG.12246	NA
29203	i	novel	0.424341	-0.0139264	chr14	-	113317995	113320853	MSTRG.12247.1	1	2859	MSTRG.12247	NA
29204	i	novel	0.01265	-0.090112	chr14	-	113336009	113336231	MSTRG.12248.1	1	223	MSTRG.12248	NA
29205	i	novel	0.0385008	-0.012288	chr14	-	113346473	113347011	MSTRG.12249.1	1	539	MSTRG.12249	NA
29261	i	novel	0.0174651	-0.016384	chr14	.	113676242	113676722	MSTRG.12253.1	1	481	MSTRG.12253	NA
29265	i	novel	0.0116637	-0.008192	chr14	.	113709644	113711311	MSTRG.12255.1	1	1668	MSTRG.12255	NA
29266	i	novel	0.11195	-0.167936	chr14	.	113718556	113719296	MSTRG.12256.1	1	741	MSTRG.12256	NA
29224	i	novel	0.16735	-0.0323584	chr14	.	113453934	113454346	MSTRG.12262.1	1	413	MSTRG.12262	NA
29231	o	novel	0.114715	-0.0360448	chr14	-	113486650	113583019	MSTRG.12265.1	2	4964	MSTRG.12265	NA
29232	o	novel	0.134657	-0.118784	chr14	-	113494944	113517748	MSTRG.12266.1	2	1533	MSTRG.12266	NA
29238	i	novel	0.301315	-0.0741376	chr14	-	113507707	113513040	MSTRG.12268.1	2	3915	MSTRG.12268	NA
29239	o	novel	0.0076437	-0.1024	chr14	+	113516079	113578287	MSTRG.12269.1	2	208	MSTRG.12269	NA
2783	u	novel	0.0164614	-0.004096	chr1	+	106933244	106963883	MSTRG.1227.1	2	981	MSTRG.1227	NA
29240	o	novel	0.0493917	-0.008192	chr14	-	113516147	113553590	MSTRG.12270.1	2	1149	MSTRG.12270	NA
29241	i	novel	0.110156	-0.0004096	chr14	-	113516148	113529247	MSTRG.12270.2	2	11291	MSTRG.12270	NA
29245	j	novel	0.115951	-0.053248	chr14	-	113533974	113552281	MSTRG.12271.1	6	2780	MSTRG.12271	NA
29246	i	novel	0.378462	-0.004096	chr14	-	113546992	113557798	MSTRG.12272.1	2	5920	MSTRG.12272	NA
29252	i	novel	0.0267436	-0.090112	chr14	-	113573520	113574008	MSTRG.12274.1	1	489	MSTRG.12274	NA
29253	i	novel	0.392933	-0.026624	chr14	-	113599871	113602310	MSTRG.12275.1	1	2440	MSTRG.12275	NA
29272	i	novel	0.0593513	-0.022528	chr14	-	113737963	113745330	MSTRG.12277.1	2	3683	MSTRG.12277	NA
29275	i	novel	0.124123	-0.0172032	chr14	-	113741859	113751873	MSTRG.12278.1	2	5145	MSTRG.12278	NA
29277	i	novel	0.155366	-0.0172032	chr14	-	113745583	113751867	MSTRG.12278.2	2	4200	MSTRG.12278	NA
29278	i	novel	0.202277	-0.0106496	chr14	-	113752461	113761485	MSTRG.12279.1	2	5213	MSTRG.12279	NA
29282	i	novel	0.112026	-0.0233472	chr14	-	113757112	113761797	MSTRG.12279.2	2	1867	MSTRG.12279	NA
29283	i	novel	0.174739	-0.0106496	chr14	-	113757377	113761433	MSTRG.12279.3	2	3445	MSTRG.12279	NA
29290	x	novel	0.0447113	-0.01024	chr14	-	113788695	113798051	MSTRG.12280.1	3	3927	MSTRG.12280	NA
29340	i	novel	0.055742	-0.04096	chr14	-	114254433	114257824	MSTRG.12282.1	2	2830	MSTRG.12282	NA
29341	i	novel	0.161371	-0.0004096	chr14	.	114258625	114259103	MSTRG.12283.1	1	479	MSTRG.12283	NA
29304	i	novel	0.0594567	-0.04096	chr14	+	113897588	113901760	MSTRG.12291.1	1	4173	MSTRG.12291	NA
29305	i	novel	0.0547239	-0.0217088	chr14	-	113901983	113906966	MSTRG.12292.1	1	4984	MSTRG.12292	NA
29307	i	novel	0.134035	-0.0258048	chr14	-	113907025	113979759	MSTRG.12293.1	4	14415	MSTRG.12293	NA
29308	i	novel	0.00756404	-0.0118784	chr14	-	113907068	113909976	MSTRG.12293.2	2	1197	MSTRG.12293	NA
29309	i	novel	0.074016	-0.053248	chr14	-	113907243	113910903	MSTRG.12293.3	2	2249	MSTRG.12293	NA
29310	i	novel	0.357143	-0.057344	chr14	+	113911247	113921146	MSTRG.12294.2	2	5187	MSTRG.12294	NA
29312	i	novel	0.0414869	-0.059392	chr14	+	113917755	113942155	MSTRG.12294.3	2	1816	MSTRG.12294	NA
29311	i	novel	0.0882972	-0.0446464	chr14	+	113917149	113917658	MSTRG.12295.1	2	463	MSTRG.12295	NA
29313	i	novel	0.229396	-0.065536	chr14	-	113921240	113929998	MSTRG.12296.1	2	7712	MSTRG.12296	NA
29314	i	novel	0.0667054	-0.0065536	chr14	-	113986095	113989191	MSTRG.12297.1	1	3097	MSTRG.12297	NA
29315	i	novel	0.0696285	-0.0495616	chr14	-	113998931	114002447	MSTRG.12298.1	2	1104	MSTRG.12298	NA
253	i	novel	0.00270636	-0.0004096	chr1	.	6346203	6346459	MSTRG.123.1	1	257	MSTRG.123	NA
29333	i	novel	0.0987905	-0.20521	chr14	+	114093168	114096049	MSTRG.12301.1	1	2882	MSTRG.12301	NA
29335	i	novel	0.0524089	-0.016384	chr14	+	114099912	114108641	MSTRG.12302.1	1	8730	MSTRG.12302	NA
29336	i	novel	0.0664108	-0.0073728	chr14	-	114161848	114166912	MSTRG.12303.1	2	2291	MSTRG.12303	NA
29337	i	novel	0.0071936	-0.109773	chr14	.	114183712	114183916	MSTRG.12304.1	1	205	MSTRG.12304	NA
29381	i	novel	0.0766308	-0.0016384	chr14	.	114817467	114820211	MSTRG.12310.1	1	2745	MSTRG.12310	NA
29382	i	novel	0.00498575	-0.0004096	chr14	.	114838972	114839217	MSTRG.12311.1	1	246	MSTRG.12311	NA
29406	i	novel	0.0359674	-0.0036864	chr14	.	115358840	115359318	MSTRG.12317.1	1	479	MSTRG.12317	NA
29420	i	novel	0.0283477	-0.0147456	chr14	.	118532669	118533038	MSTRG.12322.1	1	370	MSTRG.12322	NA
29422	u	novel	0.0527102	-0.024576	chr14	.	119083027	119083354	MSTRG.12323.1	1	328	MSTRG.12323	NA
29424	u	novel	0.00499534	-0.0004096	chr14	.	119914625	119914937	MSTRG.12324.1	1	313	MSTRG.12324	NA
29425	u	novel	0.182958	-0.004096	chr14	.	119968968	119969625	MSTRG.12325.1	1	658	MSTRG.12325	NA
29439	i	novel	0.0553513	-0.073728	chr14	+	120459471	120471145	MSTRG.12328.1	2	11631	MSTRG.12328	NA
2851	u	novel	0.0095691	-0.0004096	chr1	.	107673003	107673347	MSTRG.1233.1	1	345	MSTRG.1233	NA
29442	i	novel	0.0439552	-0.118784	chr14	-	120474823	120489099	MSTRG.12331.1	2	14236	MSTRG.12331	NA
29443	i	novel	0.114459	-0.024576	chr14	-	120500677	120505205	MSTRG.12332.1	2	3872	MSTRG.12332	NA
29444	o	novel	0.0237814	-0.0012288	chr14	+	120500681	120577330	MSTRG.12333.1	2	2567	MSTRG.12333	NA
29445	i	novel	0.0839882	-0.22528	chr14	-	120516228	120517719	MSTRG.12334.1	1	1492	MSTRG.12334	NA
29448	x	novel	0.160592	-0.158106	chr14	-	120549112	120557120	MSTRG.12335.1	2	2169	MSTRG.12335	NA
29452	i	novel	0.151414	-0.022528	chr14	-	120669793	120680277	MSTRG.12337.1	1	10485	MSTRG.12337	NA
29453	i	novel	0.0726708	-0.04096	chr14	-	120696091	120705182	MSTRG.12338.1	2	8098	MSTRG.12338	NA
29459	o	novel	0.0794988	-0.04096	chr14	+	120940704	120990269	MSTRG.12341.1	2	205	MSTRG.12341	NA
29462	o	novel	0.0794988	-0.04096	chr14	+	120966753	120990269	MSTRG.12341.2	2	205	MSTRG.12341	NA
29466	u	novel	0.492104	-0.0004096	chr14	.	121013141	121014234	MSTRG.12344.1	1	1094	MSTRG.12344	NA
29468	o	novel	0.0361584	-0.024576	chr14	-	121261391	121355920	MSTRG.12348.1	2	2067	MSTRG.12348	NA
2857	i	novel	0.0751927	-0.02048	chr1	-	107707892	107711929	MSTRG.1235.1	2	2985	MSTRG.1235	NA
2858	i	novel	0.0119696	-0.053248	chr1	-	107710160	107711887	MSTRG.1235.2	2	675	MSTRG.1235	NA
29479	x	novel	0.0280512	-0.057344	chr14	-	121312772	121318554	MSTRG.12350.1	2	3467	MSTRG.12350	NA
29480	j	novel	0.094187	-0.0262144	chr14	-	121326714	121348549	MSTRG.12351.1	4	1293	MSTRG.12351	NA
29481	j	novel	0.171875	-0.0679936	chr14	-	121326728	121344785	MSTRG.12351.2	4	6659	MSTRG.12351	NA
29486	i	novel	0.0663081	-0.016384	chr14	+	121351822	121358506	MSTRG.12353.1	2	4866	MSTRG.12353	NA
29487	i	novel	0.0638321	-0.18432	chr14	-	121351851	121378156	MSTRG.12354.1	2	2692	MSTRG.12354	NA
29490	i	novel	0.146948	-0.073728	chr14	-	121364031	121386862	MSTRG.12354.2	2	11467	MSTRG.12354	NA
29488	i	novel	0.0470843	-0.0610304	chr14	-	121356159	121360107	MSTRG.12355.1	2	2870	MSTRG.12355	NA
29489	i	novel	0.0441483	-0.016384	chr14	+	121360169	121363960	MSTRG.12356.1	2	3046	MSTRG.12356	NA
2859	i	novel	0.0664197	-0.053248	chr1	-	107723555	107727914	MSTRG.1236.1	2	2703	MSTRG.1236	NA
29511	i	novel	0.0125755	-0.233062	chr14	+	122832059	122832922	MSTRG.12360.1	1	864	MSTRG.12360	NA
29516	i	novel	0.210224	-0.0446464	chr14	-	122936930	122946945	MSTRG.12362.1	2	9705	MSTRG.12362	NA
29517	i	novel	0.281938	-0.028672	chr14	-	122985006	122996676	MSTRG.12363.1	2	4703	MSTRG.12363	NA
29518	i	novel	0.0100934	-0.02048	chr14	-	123072811	123073815	MSTRG.12364.1	1	1005	MSTRG.12364	NA
29519	i	novel	0.0472473	-0.0098304	chr14	+	123077650	123090709	MSTRG.12365.1	2	11503	MSTRG.12365	NA
29520	i	novel	0.0300201	-0.126976	chr14	+	123092028	123094035	MSTRG.12366.1	2	1923	MSTRG.12366	NA
29521	i	novel	0.0160819	-0.028672	chr14	+	123093005	123094435	MSTRG.12366.2	2	1342	MSTRG.12366	NA
29522	i	novel	0.122989	-0.0192512	chr14	-	123108052	123112146	MSTRG.12367.1	1	4095	MSTRG.12367	NA
29574	i	novel	0.0279605	-0.147456	chr14	.	124084560	124085462	MSTRG.12369.1	1	903	MSTRG.12369	NA
2860	i	novel	0.037337	-0.032768	chr1	-	107738619	107740490	MSTRG.1237.1	2	432	MSTRG.1237	NA
29523	x	novel	0.0648761	-0.0270336	chr14	-	123298235	123367510	MSTRG.12370.1	2	5011	MSTRG.12370	NA
29536	x	novel	0.0799705	-0.0651264	chr14	-	123344289	123355292	MSTRG.12372.1	2	10126	MSTRG.12372	NA
29538	i	novel	0.369888	-0.0729088	chr14	-	123367702	123382406	MSTRG.12373.1	2	10500	MSTRG.12373	NA
29540	i	novel	0.289276	-0.0192512	chr14	+	123390995	123405257	MSTRG.12375.1	2	14232	MSTRG.12375	NA
29541	i	novel	0.0759474	-0.024576	chr14	+	123425651	123430909	MSTRG.12376.1	1	5259	MSTRG.12376	NA
29543	i	novel	0.08132	-0.032768	chr14	-	123431408	123435705	MSTRG.12377.1	1	4298	MSTRG.12377	NA
29546	i	novel	0.175343	-0.06144	chr14	-	123442329	123444525	MSTRG.12378.1	1	2197	MSTRG.12378	NA
29548	i	novel	0.0767566	-0.0405504	chr14	-	123455272	123464174	MSTRG.12379.1	1	8903	MSTRG.12379	NA
2861	i	novel	0.042805	-0.008192	chr1	-	107767000	107769090	MSTRG.1238.1	1	2091	MSTRG.1238	NA
29552	i	novel	0.465549	-0.0458752	chr14	-	123508023	123519187	MSTRG.12381.1	1	11165	MSTRG.12381	NA
29554	u	novel	0.0160667	-0.138035	chr14	-	123546470	123547465	MSTRG.12382.1	1	996	MSTRG.12382	NA
29569	i	novel	0.00739779	-0.0004096	chr14	.	124026797	124027361	MSTRG.12386.1	1	565	MSTRG.12386	NA
29570	i	novel	0.0120837	-0.032768	chr14	.	124029041	124029723	MSTRG.12387.1	1	683	MSTRG.12387	NA
29571	i	novel	0.0106175	-0.008192	chr14	.	124037187	124037611	MSTRG.12388.1	1	425	MSTRG.12388	NA
29592	u	novel	0.0688474	-0.02048	chr14	-	124689034	124713631	MSTRG.12396.1	2	6344	MSTRG.12396	NA
29645	i	novel	0.145685	-0.0004096	chr14	-	125451900	125452134	MSTRG.12398.1	1	235	MSTRG.12398	NA
254	i	novel	0.0137183	-0.06144	chr1	.	6351626	6352320	MSTRG.124.1	1	695	MSTRG.124	NA
29647	i	novel	0.065827	-0.0086016	chr14	-	125549641	125551718	MSTRG.12400.1	1	2078	MSTRG.12400	NA
29648	i	novel	0.0334969	-0.0417792	chr14	-	125959915	125962883	MSTRG.12401.1	1	2969	MSTRG.12401	NA
29649	i	novel	0.0457391	-0.016384	chr14	-	126009325	126012468	MSTRG.12402.1	1	3144	MSTRG.12402	NA
29650	o	novel	0.0124938	-0.172032	chr14	+	126068102	126142200	MSTRG.12403.1	2	905	MSTRG.12403	NA
29651	i	novel	0.049677	-0.08192	chr14	-	126079265	126083007	MSTRG.12404.1	1	3743	MSTRG.12404	NA
29677	u	novel	0.0887571	-0.04096	chr14	.	127256055	127256364	MSTRG.12406.1	1	310	MSTRG.12406	NA
29669	i	novel	0.0464618	-0.0258048	chr14	.	127014637	127015858	MSTRG.12408.1	1	1222	MSTRG.12408	NA
29683	i	novel	0.109192	-0.114688	chr14	+	127434411	127436953	MSTRG.12414.1	1	2543	MSTRG.12414	NA
29684	o	novel	0.144165	-0.0544768	chr14	-	127468308	127554314	MSTRG.12415.1	2	2760	MSTRG.12415	NA
29615	o	novel	0.0696694	-0.0053248	chr14	-	124829100	124859461	MSTRG.12417.1	2	18653	MSTRG.12417	NA
29616	i	novel	0.16598	-0.0315392	chr14	+	125006728	125007846	MSTRG.12418.1	1	1119	MSTRG.12418	NA
29617	i	novel	0.0492044	-0.0540672	chr14	+	125018110	125042876	MSTRG.12419.1	2	4896	MSTRG.12419	NA
29618	i	novel	0.257494	-0.0434176	chr14	+	125026626	125080551	MSTRG.12420.1	2	10695	MSTRG.12420	NA
29619	i	novel	0.273733	-0.02048	chr14	+	125038946	125062563	MSTRG.12420.2	2	6045	MSTRG.12420	NA
29621	i	novel	0.264449	-0.032768	chr14	+	125052294	125077763	MSTRG.12420.3	2	7496	MSTRG.12420	NA
29622	i	novel	0.0976796	-0.016384	chr14	+	125073025	125077705	MSTRG.12420.4	2	3616	MSTRG.12420	NA
29620	i	novel	0.0903636	-0.0405504	chr14	+	125043015	125052180	MSTRG.12421.1	2	8778	MSTRG.12421	NA
29624	x	novel	0.0472999	-0.0036864	chr14	+	125106123	125122382	MSTRG.12423.1	3	2435	MSTRG.12423	NA
29625	u	novel	0.0388102	-0.151552	chr14	.	125148265	125148514	MSTRG.12424.1	1	250	MSTRG.12424	NA
29630	i	novel	0.0568849	-0.0569344	chr14	-	125159168	125166798	MSTRG.12426.1	2	5120	MSTRG.12426	NA
29688	u	novel	0.0913673	-0.016384	chr14	.	127700008	127700235	MSTRG.12428.1	1	228	MSTRG.12428	NA
29685	u	novel	0.0520587	-0.0540672	chr14	-	127628703	127649884	MSTRG.12429.1	3	2530	MSTRG.12429	NA
29686	u	novel	0.0159932	-0.032768	chr14	-	127629493	127649881	MSTRG.12429.2	2	458	MSTRG.12429	NA
2817	i	novel	0.157479	-0.024576	chr1	-	107366605	107397194	MSTRG.1243.1	2	9389	MSTRG.1243	NA
29689	u	novel	0.0780176	-0.043008	chr14	.	128051673	128061367	MSTRG.12431.1	1	9695	MSTRG.12431	NA
29695	i	novel	0.136341	-0.0606208	chr14	+	128082368	128097887	MSTRG.12434.1	1	15520	MSTRG.12434	NA
29713	u	novel	0.018958	-0.0577536	chr14	.	128758644	128758850	MSTRG.12436.1	1	207	MSTRG.12436	NA
29712	i	novel	0.30735	-0.049152	chr14	+	128713000	128724179	MSTRG.12438.1	2	7486	MSTRG.12438	NA
2819	x	novel	0.393761	-0.0360448	chr1	+	107383647	107463402	MSTRG.1244.1	2	20409	MSTRG.1244	NA
29785	o	novel	0.167958	-0.077824	chr14	-	129684141	129741503	MSTRG.12444.1	3	3353	MSTRG.12444	NA
29787	i	novel	0.0623962	-0.0139264	chr14	+	129729529	129741596	MSTRG.12446.1	2	10126	MSTRG.12446	NA
29788	i	novel	0.0424698	-0.0004096	chr14	+	129734628	129741551	MSTRG.12446.2	2	4395	MSTRG.12446	NA
29789	i	novel	0.0644173	-0.057344	chr14	+	129738213	129741617	MSTRG.12446.3	2	1464	MSTRG.12446	NA
2820	i	novel	0.0715877	-0.053248	chr1	-	107408652	107413932	MSTRG.1245.1	2	1785	MSTRG.1245	NA
29734	o	novel	0.212818	-0.057344	chr14	+	129061493	129143101	MSTRG.12456.1	3	8864	MSTRG.12456	NA
29742	i	novel	0.0877404	-0.0376832	chr14	-	129125379	129136398	MSTRG.12459.1	1	11020	MSTRG.12459	NA
2821	i	novel	0.0649829	-0.0319488	chr1	-	107420864	107497902	MSTRG.1246.1	2	2671	MSTRG.1246	NA
2829	i	novel	0.0608591	-0.069632	chr1	-	107491674	107497638	MSTRG.1246.2	2	2485	MSTRG.1246	NA
29743	i	novel	0.0406905	-0.02048	chr14	-	129142966	129147446	MSTRG.12460.1	2	2613	MSTRG.12460	NA
29744	i	novel	0.234622	-0.024576	chr14	-	129147496	129155799	MSTRG.12461.1	1	8304	MSTRG.12461	NA
29745	i	novel	0.0536349	-0.024576	chr14	+	129157328	129159553	MSTRG.12462.1	2	729	MSTRG.12462	NA
29746	i	novel	0.0608072	-0.0208896	chr14	-	129159707	129163759	MSTRG.12463.1	1	4053	MSTRG.12463	NA
29748	i	novel	0.220119	-0.0434176	chr14	+	129177370	129186339	MSTRG.12465.1	2	7953	MSTRG.12465	NA
29749	i	novel	0.176672	-0.0454656	chr14	-	129189287	129197905	MSTRG.12466.1	2	7570	MSTRG.12466	NA
29750	i	novel	0.222938	-0.024576	chr14	-	129230319	129254450	MSTRG.12467.1	2	20571	MSTRG.12467	NA
29751	i	novel	0.138756	-0.0458752	chr14	+	129263556	129271179	MSTRG.12468.1	2	7036	MSTRG.12468	NA
29754	i	novel	0.218303	-0.0610304	chr14	-	129301665	129311838	MSTRG.12469.1	1	10174	MSTRG.12469	NA
2822	i	novel	0.032385	-0.12288	chr1	+	107421447	107426026	MSTRG.1247.1	2	2281	MSTRG.1247	NA
29755	i	novel	0.201088	-0.055296	chr14	+	129301686	129314822	MSTRG.12470.1	2	7854	MSTRG.12470	NA
29772	i	novel	0.239321	-0.0753664	chr14	-	129511037	129526453	MSTRG.12473.1	1	15417	MSTRG.12473	NA
2823	i	novel	0.0699091	-0.0622592	chr1	-	107426162	107435914	MSTRG.1248.1	3	5193	MSTRG.1248	NA
29811	i	novel	0.348638	-0.0380928	chr14	+	131428539	131454716	MSTRG.12480.1	2	26052	MSTRG.12480	NA
29812	i	novel	0.197139	-0.0380928	chr14	+	131451044	131454716	MSTRG.12480.2	2	3559	MSTRG.12480	NA
29815	i	novel	0.22097	-0.002048	chr14	+	131560510	131563211	MSTRG.12482.1	1	2702	MSTRG.12482	NA
29828	x	novel	0.0214228	-0.0258048	chr14	-	131774834	131822596	MSTRG.12488.1	2	1070	MSTRG.12488	NA
2824	i	novel	0.153682	-0.008192	chr1	+	107426204	107497902	MSTRG.1249.1	2	21133	MSTRG.1249	NA
2836	x	novel	0.0475733	-0.057344	chr1	+	107498071	107567588	MSTRG.1249.10	2	5531	MSTRG.1249	NA
2845	i	novel	0.0211502	-0.151552	chr1	+	107564336	107567588	MSTRG.1249.11	2	2062	MSTRG.1249	NA
2825	i	novel	0.240942	-0.0094208	chr1	+	107437669	107491536	MSTRG.1249.2	3	8304	MSTRG.1249	NA
2826	i	novel	0.0582325	-0.183091	chr1	+	107467472	107486736	MSTRG.1249.3	2	775	MSTRG.1249	NA
2827	i	novel	0.0517154	-0.057344	chr1	+	107467515	107519768	MSTRG.1249.4	2	7651	MSTRG.1249	NA
2828	i	novel	0.0653245	-0.086016	chr1	+	107468287	107482339	MSTRG.1249.5	2	11678	MSTRG.1249	NA
2830	i	novel	0.149669	-0.057344	chr1	+	107492077	107497635	MSTRG.1249.6	2	3763	MSTRG.1249	NA
2831	i	novel	0.20212	-0.057344	chr1	+	107492081	107497606	MSTRG.1249.7	2	4261	MSTRG.1249	NA
2833	i	novel	0.0880475	-0.057344	chr1	+	107498038	107514235	MSTRG.1249.8	2	15022	MSTRG.1249	NA
2835	i	novel	0.0880475	-0.057344	chr1	+	107498065	107513374	MSTRG.1249.9	2	13923	MSTRG.1249	NA
[truncated: 19,705 more rows]
