# Supplementary material for: Mechanisms of Oogenesis-Related Long Non-coding RNAs in Porcine Ovaries Treated With Recombinant Pig Follicle-Stimulating Hormone
Source: Front Vet Sci. 2022 Feb 24;8:838703. doi: 10.3389/fvets.2021.838703 (PMC8908959; doi:10.3389/fvets.2021.838703)
Supplement: Supplementary file 4 [file Table_4.XLSX]

## Sheet: Sheet1
Supplymentary Table-S4 Differentially expressed genes
gene_id	gene_name	transcript_id	GO	KEGG	KO_ENTRY	EC	Description	trans_type	FPKM.Treat1	FPKM.Treat2	FPKM.Treat3	FPKM.Treat4	FPKM.Treat5	FPKM.Control1	FPKM.Control2	FPKM.Control3	FPKM.Control4	FPKM.Control5	fc	log2(fc)	pval	qval	regulation	significant
MSTRG.29411	FYB2	ENSSSCT00000060810;ENSSSCT00000044846;ENSSSCT00000056538;ENSSSCT00000051897	GO:0001772(immunological synapse);GO:0005515(protein binding);GO:0033627(cell adhesion mediated by integrin);GO:0045121(membrane raft);GO:0050852(T cell receptor signaling pathway);GO:0050852(T cell receptor signaling pathway)	NA	NA	NA	FYN binding protein 2 [Source:NCBI gene;Acc:100512236]	protein_coding	0.0307509	0.0533499	0.0738347	0.044782	0.0397764	1.60818	0.700622	3.14371	0.0225913	1.37763	0.0353865	-4.82066	6.60955e-10	3.93639e-06	down	yes
ENSSSCG00000034242	HNF4G	ENSSSCT00000043514;ENSSSCT00000054884;ENSSSCT00000041766;ENSSSCT00000041886;ENSSSCT00000046793	GO:0000978(RNA polymerase II proximal promoter sequence-specific DNA binding);GO:0003323(type B pancreatic cell development);GO:0003677(DNA binding);GO:0003700(DNA-binding transcription factor activity);GO:0003707(steroid hormone receptor activity);GO:0005634(nucleus);GO:0006355(regulation of transcription, DNA-templated);GO:0008270(zinc ion binding);GO:0043401(steroid hormone mediated signaling …	04950(Maturity onset diabetes of the young);04950(Maturity onset diabetes of the young)	K08037	NA	hepatocyte nuclear factor 4 gamma [Source:NCBI gene;Acc:110260272]	protein_coding	0.0001	0.0001	0.0001	0.0001	0.0001	0.0156251	0.273473	0.0216424	0.0373905	0.44931	0.000627005	-10.6392	2.36974e-09	1.09644e-05	down	yes
MSTRG.17162	BET1L	ENSSSCT00000049566;ENSSSCT00000015906	GO:0000138(Golgi trans cisterna);GO:0005484(SNAP receptor activity);GO:0005768(endosome);GO:0005794(Golgi apparatus);GO:0005829(cytosol);GO:0015031(protein transport);GO:0016020(membrane);GO:0016021(integral component of membrane);GO:0030173(integral component of Golgi membrane);GO:0031201(SNARE complex);GO:0042147(retrograde transport, endosome to Golgi);GO:0061025(membrane fusion);GO:2000156(re…	04130(SNARE interactions in vesicular transport);04130(SNARE interactions in vesicular transport)	K08504	NA	Bet1 golgi vesicular membrane trafficking protein like [Source:NCBI gene;Acc:100517332]	protein_coding	7.00799	7.16573	1.16027	7.13885	5.75609	0.945581	0.94933	0.86562	1.59487	0.767074	5.5108	2.46226	1.83324e-07	0.000242159	up	yes
MSTRG.8934	WDR49	ENSSSCT00000012849;ENSSSCT00000056068	GO:0005509(calcium ion binding);GO:0005515(protein binding);GO:0005515(protein binding)	NA	NA	NA	WD repeat domain 49 [Source:NCBI gene;Acc:100517558]	protein_coding	0.0001	0.0119821	0.0162067	0.0001	0.0001	0.0134868	3.00482	0.0129909	0.0306273	4.76045	0.00364196	-8.10107	2.61875e-06	0.00210759	down	yes
MSTRG.2968	ENSSSCG00000038171;ENSSSCG00000005398	ENSSSCT00000053764;ENSSSCT00000053277;ENSSSCT00000057090;ENSSSCT00000005941	GO:0006637(acyl-CoA metabolic process);GO:0016790(thiolester hydrolase activity);GO:0005777(peroxisome);GO:0006631(fatty acid metabolic process);GO:0047617(acyl-CoA hydrolase activity);GO:0047617(acyl-CoA hydrolase activity)	00120(Primary bile acid biosynthesis);00430(Taurine and hypotaurine metabolism);01040(Biosynthesis of unsaturated fatty acids);04146(Peroxisome);04976(Bile secretion)	K00659	3.1.2.2;EC:2.3.1.65	acyl-coenzyme A amino acid N-acyltransferase 2 [Source:NCBI gene;Acc:100515185];acyl-coenzyme A amino acid N-acyltransferase 2-like [Source:NCBI gene;Acc:110255172]	protein_coding	0.018273	0.0138623	0.0278673	0.00796704	0.0576186	0.0382318	1.7963	0.0424782	0.0434097	2.53701	0.028175	-5.14944	3.52697e-06	0.00262565	down	yes
MSTRG.8418	ATP2B2	ENSSSCT00000061352;ENSSSCT00000013960;ENSSSCT00000038542;ENSSSCT00000056176;ENSSSCT00000053835;ENSSSCT00000044254;ENSSSCT00000012666	GO:0000166(nucleotide binding);GO:0005388(calcium-transporting ATPase activity);GO:0005524(ATP binding);GO:0005737(cytoplasm);GO:0005887(integral component of plasma membrane);GO:0006811(ion transport);GO:0006816(calcium ion transport);GO:0006874(cellular calcium ion homeostasis);GO:0007605(sensory perception of sound);GO:0016020(membrane);GO:0016021(integral component of membrane);GO:0016787(hyd…	04020(Calcium signaling pathway);04022(cGMP-PKG signaling pathway);04024(cAMP signaling pathway);04261(Adrenergic signaling in cardiomyocytes);04925(Aldosterone synthesis and secretion);04970(Salivary secretion);04972(Pancreatic secretion);04972(Pancreatic secretion)	K05850	EC:7.2.2.10	ATPase plasma membrane Ca2+ transporting 2 [Source:NCBI gene;Acc:100625418]	protein_coding	0.0275451	0.0248159	0.0992977	0.012926	0.049431	0.10694	2.08265	0.0510437	0.0616724	4.27857	0.0325209	-4.94249	3.65901e-06	0.00265751	down	yes
MSTRG.415	ECT2L	ENSSSCT00000004583	GO:0005089(Rho guanyl-nucleotide exchange factor activity);GO:0005515(protein binding);GO:0035023(regulation of Rho protein signal transduction)	NA	NA	NA	epithelial cell transforming 2 like [Source:NCBI gene;Acc:100153588]	protein_coding	0.026716	0.046034	0.106393	0.033894	0.014382	0.096583	2.57122	0.053464	0.175945	2.30675	0.0437011	-4.51619	5.95383e-06	0.00345552	down	yes
MSTRG.26632	HYDIN	ENSSSCT00000042048	GO:0002064(epithelial cell development);GO:0003341(cilium movement);GO:0007275(multicellular organism development);GO:0007420(brain development);GO:0021591(ventricular system development);GO:0060438(trachea development);GO:1904158(axonemal central apparatus assembly);GO:1990718(axonemal central pair projection)	NA	K17570	NA	HYDIN, axonemal central pair apparatus protein [Source:NCBI gene;Acc:100513208]	protein_coding	0.0605364	0.104224	0.410821	0.157388	0.045758	0.131385	8.61713	0.1535	0.357998	15.2004	0.0318362	-4.97319	6.03422e-06	0.00345552	down	yes
MSTRG.14282	DNAH5	ENSSSCT00000054017	GO:0003341(cilium movement);GO:0003777(microtubule motor activity);GO:0005524(ATP binding);GO:0005858(axonemal dynein complex);GO:0005930(axoneme);GO:0007018(microtubule-based movement);GO:0007368(determination of left/right symmetry);GO:0007507(heart development);GO:0021670(lateral ventricle development);GO:0030286(dynein complex);GO:0030317(flagellated sperm motility);GO:0036157(outer dynein ar…	05016(Huntington disease)	K10408	NA	dynein axonemal heavy chain 5 [Source:NCBI gene;Acc:100623921]	protein_coding	0.0868193	0.380953	0.222291	0.46228	0.648969	0.716446	7.32021	0.297015	1.18815	12.5635	0.0815615	-3.61597	7.75511e-06	0.00405143	down	yes
MSTRG.26744	DRC7	ENSSSCT00000003117	GO:0005737(cytoplasm);GO:0030317(flagellated sperm motility);GO:0031514(motile cilium);GO:0048870(cell motility)	NA	NA	NA	dynein regulatory complex subunit 7 [Source:NCBI gene;Acc:100515380]	protein_coding	0.052469	0.029482	0.059522	0.018784	0.015737	0.041661	2.48989	0.035976	0.055148	4.87808	0.0234635	-5.41344	8.59319e-06	0.00441186	down	yes
MSTRG.3280	WDR38	ENSSSCT00000006150	GO:0002244(hematopoietic progenitor cell differentiation);GO:0005515(protein binding)	NA	NA	NA	WD repeat domain 38 [Source:NCBI gene;Acc:100154489]	protein_coding	0.0001	0.0001	0.0001	0.0001	0.0001	0.0001	1.18181	0.0001	0.064853	0.973246	0.000225214	-12.1164	1.02608e-05	0.00509244	down	yes
MSTRG.30876	CFAP161	ENSSSCT00000002001	NA	NA	NA	NA	cilia and flagella associated protein 161 [Source:NCBI gene;Acc:100156420]	protein_coding	0.0001	0.038021	0.04535	0.0001	0.0001	0.052293	2.07734	0.129367	0.103025	3.61068	0.0140089	-6.15751	1.07303e-05	0.00518459	down	yes
MSTRG.31859	IRF2BPL	ENSSSCT00000002660;ENSSSCT00000050073	GO:0000122(negative regulation of transcription by RNA polymerase II);GO:0000977(RNA polymerase II regulatory region sequence-specific DNA binding);GO:0001228(DNA-binding transcription activator activity, RNA polymerase II-specific);GO:0005634(nucleus);GO:0005654(nucleoplasm);GO:0007399(nervous system development);GO:0016567(protein ubiquitination);GO:0045944(positive regulation of transcription …	NA	K22383	NA	interferon regulatory factor 2 binding protein like [Source:NCBI gene;Acc:100152768]	protein_coding	0.0001	0.0001	1.56094	2.71285	0.0001	0.0001	0.0001	0.0001	0.0001	0.0001	8548.18	13.0614	1.07947e-05	0.00518459	up	yes
MSTRG.23826	ENSSSCG00000033862;ENSSSCG00000035936	ENSSSCT00000007339;ENSSSCT00000007338	GO:0004930(G protein-coupled receptor activity);GO:0004984(olfactory receptor activity);GO:0005549(odorant binding);GO:0005886(plasma membrane);GO:0007165(signal transduction);GO:0007186(G protein-coupled receptor signaling pathway);GO:0007608(sensory perception of smell);GO:0016020(membrane);GO:0016021(integral component of membrane);GO:0050896(response to stimulus);GO:0050911(detection of chemi…	NA	NA	NA	olfactory receptor 5V1-like [Source:NCBI gene;Acc:110260331];olfactory receptor 5V1-like [Source:NCBI gene;Acc:110260330]	protein_coding	14.9371	0.256093	0.0198633	0.908188	0.0511038	0.114054	0.0214359	0.0405149	0.125101	0.0684768	43.7584	5.45149	1.14357e-05	0.00540529	up	yes
ENSSSCG00000032298	ABCC11	ENSSSCT00000062565	GO:0000166(nucleotide binding);GO:0005524(ATP binding);GO:0005887(integral component of plasma membrane);GO:0008514(organic anion transmembrane transporter activity);GO:0015216(purine nucleotide transmembrane transporter activity);GO:0015711(organic anion transport);GO:0015865(purine nucleotide transport);GO:0016020(membrane);GO:0016021(integral component of membrane);GO:0016887(ATPase activity);…	02010(ABC transporters)	K05671	NA	ATP binding cassette subfamily C member 11 [Source:NCBI gene;Acc:110260969]	protein_coding	0.0001	0.0001	0.0001	0.0001	0.0001	0.0001	0.249498	0.011898	0.0001	0.297613	0.00089412	-10.1272	1.24346e-05	0.00578561	down	yes
MSTRG.6209	LRRC46	ENSSSCT00000038354;ENSSSCT00000041707;ENSSSCT00000019074	GO:0005515(protein binding);GO:0005515(protein binding)	NA	NA	NA	leucine rich repeat containing 46 [Source:NCBI gene;Acc:100519171]	protein_coding	0.146398	0.145807	0.156714	0.163078	0.13749	0.245922	3.35764	0.248014	0.278624	5.94868	0.0743621	-3.74929	1.52119e-05	0.00676089	down	yes
ENSSSCG00000026175	FAM81B	ENSSSCT00000029964	NA	NA	NA	NA	family with sequence similarity 81 member B [Source:NCBI gene;Acc:100522665]	protein_coding	0.0001	0.0001	0.013267	0.0001	0.006409	0.062227	1.04586	0.02181	0.0001	1.20521	0.00855428	-6.86914	1.58031e-05	0.00692038	down	yes
MSTRG.26859	LRRC36	ENSSSCT00000003077	GO:0005515(protein binding)	NA	K16594	NA	leucine rich repeat containing 36 [Source:NCBI gene;Acc:100524316]	protein_coding	0.115575	0.039397	0.094228	0.051048	0.024465	0.383557	1.07633	0.440465	0.075889	1.30171	0.0990599	-3.33556	1.63083e-05	0.0070363	down	yes
MSTRG.32597	SPATA18	ENSSSCT00000009670;ENSSSCT00000052619	GO:0005737(cytoplasm);GO:0005741(mitochondrial outer membrane);GO:0006974(cellular response to DNA damage stimulus);GO:0035694(mitochondrial protein catabolic process);GO:0035695(mitophagy by induced vacuole formation);GO:0043231(intracellular membrane-bounded organelle);GO:0043231(intracellular membrane-bounded organelle)	NA	K22257	NA	spermatogenesis associated 18 [Source:NCBI gene;Acc:100415808]	protein_coding	0.0354475	0.109937	0.127656	0.0910168	0.0586663	0.0403431	5.23196	0.0473011	0.0867391	7.83137	0.0319333	-4.9688	1.70953e-05	0.00707643	down	yes
MSTRG.21613	ATP6V1B1;ENSSSCG00000033145	ENSSSCT00000009105;ENSSSCT00000056046	GO:0001503(ossification);GO:0003091(renal water homeostasis);GO:0003096(renal sodium ion transport);GO:0005524(ATP binding);GO:0005737(cytoplasm);GO:0005829(cytosol);GO:0005902(microvillus);GO:0006693(prostaglandin metabolic process);GO:0006885(regulation of pH);GO:0007588(excretion);GO:0007605(sensory perception of sound);GO:0010468(regulation of gene expression);GO:0015078(proton transmembrane …	00190(Oxidative phosphorylation);04145(Phagosome);04150(mTOR signaling pathway);04721(Synaptic vesicle cycle);04966(Collecting duct acid secretion);05165(Human papillomavirus infection);05323(Rheumatoid arthritis)	K02147	NA	ATPase H+ transporting V1 subunit B1 [Source:NCBI gene;Acc:100523368]	protein_coding	0.00429557	0.01034	0.0001	0.048967	0.0001	0.0568256	5.21328	0.0001	0.138277	4.1769	0.00665624	-7.23108	1.72537e-05	0.00707643	down	yes
MSTRG.24421	ODF3B	ENSSSCT00000001057	NA	NA	NA	NA	outer dense fiber of sperm tails 3B [Source:NCBI gene;Acc:100517096]	protein_coding	0.0001	0.0001	0.0001	0.024155	0.0001	0.070706	1.21902	0.054852	0.0001	1.90779	0.00754966	-7.04937	1.78637e-05	0.00707643	down	yes
MSTRG.15986	WFDC2	ENSSSCT00000039535	GO:0004867(serine-type endopeptidase inhibitor activity);GO:0004869(cysteine-type endopeptidase inhibitor activity);GO:0005576(extracellular region);GO:0010466(negative regulation of peptidase activity);GO:0010951(negative regulation of endopeptidase activity);GO:0019828(aspartic-type endopeptidase inhibitor activity);GO:0030414(peptidase inhibitor activity)	NA	NA	NA	WAP four-disulfide core domain 2 [Source:NCBI gene;Acc:396987]	protein_coding	0.451023	0.39884	0.940585	0.133937	0.369736	0.370952	29.738	0.681314	0.571311	25.1372	0.0406048	-4.6222	1.81153e-05	0.00707643	down	yes
MSTRG.23880	SPAG17	ENSSSCT00000007368	GO:0003351(epithelial cilium movement);GO:1904158(axonemal central apparatus assembly);GO:1990716(axonemal central apparatus)	NA	NA	NA	sperm associated antigen 17 [Source:NCBI gene;Acc:100155824]	protein_coding	0.00262842	0.0732196	0.0395519	0.00478043	0.0267412	0.0886015	0.926317	0.0583635	0.0701497	2.67836	0.0384431	-4.70113	1.88049e-05	0.00717913	down	yes
MSTRG.27920	TTLL10	ENSSSCT00000054745;ENSSSCT00000003703;ENSSSCT00000047106	GO:0006464(cellular protein modification process);GO:0006464(cellular protein modification process)	NA	NA	NA	tubulin tyrosine ligase like 10 [Source:NCBI gene;Acc:102166129]	protein_coding	0.0488896	0.0438647	0.0636407	0.0612721	0.0328286	0.0497156	4.42706	0.00884067	0.0142079	6.52826	0.0227144	-5.46025	2.07854e-05	0.00764134	down	yes
MSTRG.17799	EHF	ENSSSCT00000044361;ENSSSCT00000059578;ENSSSCT00000042017;ENSSSCT00000014526	GO:0000978(RNA polymerase II proximal promoter sequence-specific DNA binding);GO:0000981(DNA-binding transcription factor activity, RNA polymerase II-specific);GO:0001228(DNA-binding transcription activator activity, RNA polymerase II-specific);GO:0003677(DNA binding);GO:0003700(DNA-binding transcription factor activity);GO:0005634(nucleus);GO:0005654(nucleoplasm);GO:0005794(Golgi apparatus);GO:0…	NA	K17102	NA	ETS homologous factor [Source:NCBI gene;Acc:100526094]	protein_coding	0.072207	0.033306	0.245125	0.0865049	0.111441	0.0555959	8.06162	0.0271024	0.263999	9.92792	0.029918	-5.06284	2.22614e-05	0.00784623	down	yes
MSTRG.8621	NME9	ENSSSCT00000063963;ENSSSCT00000041987	GO:0004550(nucleoside diphosphate kinase activity);GO:0005623(cell);GO:0006165(nucleoside diphosphate phosphorylation);GO:0006183(GTP biosynthetic process);GO:0006228(UTP biosynthetic process);GO:0006241(CTP biosynthetic process);GO:0045454(cell redox homeostasis);GO:0045454(cell redox homeostasis)	NA	K19869	NA	NME/NM23 family member 9 [Source:NCBI gene;Acc:100738818]	protein_coding	0.0645877	0.0776782	0.15858	0.0559729	0.0253775	0.0184903	5.09378	0.046451	0.228756	5.81953	0.0341033	-4.87394	2.2659e-05	0.00784623	down	yes
MSTRG.8034	ENSSSCG00000037649;ENSSSCG00000020990	ENSSSCT00000048223;ENSSSCT00000029028	GO:0003777(microtubule motor activity);GO:0007018(microtubule-based movement);GO:0005524(ATP binding);GO:0008569(ATP-dependent microtubule motor activity, minus-end-directed);GO:0030286(dynein complex);GO:0045503(dynein light chain binding);GO:0045505(dynein intermediate chain binding);GO:0051959(dynein light intermediate chain binding)	05016(Huntington disease)	K10408	NA	dynein axonemal heavy chain 12 [Source:NCBI gene;Acc:100513566]	protein_coding	0.113931	0.0276242	0.106927	0.0939393	0.151614	0.0733069	3.70842	0.0537176	0.208194	5.17338	0.0536004	-4.22161	2.27379e-05	0.00784623	down	yes
ENSSSCG00000004621	MYO5C	ENSSSCT00000060339;ENSSSCT00000052607;ENSSSCT00000005104	GO:0000166(nucleotide binding);GO:0003676(nucleic acid binding);GO:0003774(motor activity);GO:0003779(actin binding);GO:0005515(protein binding);GO:0005524(ATP binding);GO:0016459(myosin complex);GO:0051015(actin filament binding);GO:0051015(actin filament binding)	NA	K10357	NA	myosin VC [Source:NCBI gene;Acc:100155557]	protein_coding	0.0868294	0.0456974	0.130552	0.042538	0.0992957	0.228358	1.6318	0.103491	0.11076	2.49877	0.0885406	-3.49752	2.27565e-05	0.00784623	down	yes
MSTRG.13979	CFAP65	ENSSSCT00000017644;ENSSSCT00000054159;ENSSSCT00000047044;ENSSSCT00000057058	NA	NA	NA	NA	cilia and flagella associated protein 65 [Source:NCBI gene;Acc:100155984]	protein_coding	0.0113046	0.0165781	0.112179	0.0111182	0.0076028	0.0186693	2.32037	0.01332	0.0873107	5.49	0.0200238	-5.64214	2.30416e-05	0.00784623	down	yes
ENSSSCG00000017542	TTLL6	ENSSSCT00000019096	GO:0001578(microtubule bundle formation);GO:0003353(positive regulation of cilium movement);GO:0005524(ATP binding);GO:0006464(cellular protein modification process);GO:0015631(tubulin binding);GO:0018095(protein polyglutamylation);GO:0036064(ciliary basal body);GO:0051013(microtubule severing);GO:0070739(protein-glutamic acid ligase activity)	NA	K16582	EC:6.-.-.-	tubulin tyrosine ligase like 6 [Source:NCBI gene;Acc:100523818]	protein_coding	0.0001	0.0001	0.0001	0.0001	0.0001	0.0001	1.76973	0.0001	0.0001	1.69424	0.000144331	-12.7583	2.37261e-05	0.00793837	down	yes
ENSSSCG00000015258	GLB1L2	ENSSSCT00000016627;ENSSSCT00000059277;ENSSSCT00000065581;ENSSSCT00000064447;ENSSSCT00000038931;ENSSSCT00000050666	GO:0004553(hydrolase activity, hydrolyzing O-glycosyl compounds);GO:0004565(beta-galactosidase activity);GO:0005773(vacuole);GO:0005975(carbohydrate metabolic process);GO:0008152(metabolic process);GO:0016787(hydrolase activity);GO:0016798(hydrolase activity, acting on glycosyl bonds);GO:0016798(hydrolase activity, acting on glycosyl bonds)	NA	NA	NA	beta-galactosidase-1-like protein 2 [Source:NCBI gene;Acc:100520582]	protein_coding	0.0970142	0.206909	0.0504437	0.0500738	0.0733455	0.397435	0.626477	0.301888	0.237235	1.62335	0.149946	-2.73748	2.53738e-05	0.00839533	down	yes
MSTRG.20684	VWA3A	ENSSSCT00000025991	NA	NA	NA	NA	von Willebrand factor A domain containing 3A [Source:NCBI gene;Acc:100524076]	protein_coding	0.0321242	0.0413413	0.124187	0.00839503	0.0001	0.0997657	3.36549	0.0371375	0.0818259	7.12608	0.0192476	-5.69918	2.63333e-05	0.00852577	down	yes
MSTRG.903	PPIL6	ENSSSCT00000004876	GO:0000413(protein peptidyl-prolyl isomerization);GO:0003755(peptidyl-prolyl cis-trans isomerase activity);GO:0016018(cyclosporin A binding);GO:0042026(protein refolding);GO:0051082(unfolded protein binding)	NA	K12739	EC:5.2.1.8	peptidylprolyl isomerase like 6 [Source:NCBI gene;Acc:100157379]	protein_coding	0.159875	0.224256	0.320447	0.255213	0.128022	0.326332	2.99167	0.272638	0.416735	4.5748	0.126753	-2.97991	2.66249e-05	0.00852577	down	yes
MSTRG.35948	ENSSSCG00000030800	ENSSSCT00000033190	GO:0016020(membrane);GO:0016021(integral component of membrane)	NA	NA	NA		protein_coding	0.0202129	0.0513968	0.101674	0.0221137	0.120774	0.0477508	2.17897	0.0349267	0.167691	3.97715	0.0493517	-4.34076	3.23882e-05	0.00994283	down	yes
MSTRG.5799	DNAI2	ENSSSCT00000030835	GO:0003341(cilium movement);GO:0003777(microtubule motor activity);GO:0005515(protein binding);GO:0005858(axonemal dynein complex);GO:0005930(axoneme);GO:0007018(microtubule-based movement);GO:0007368(determination of left/right symmetry);GO:0008574(ATP-dependent microtubule motor activity, plus-end-directed);GO:0009897(external side of plasma membrane);GO:0030286(dynein complex);GO:0036126(sperm…	05016(Huntington disease)	K11143	NA	dynein axonemal intermediate chain 2 [Source:NCBI gene;Acc:100624095]	protein_coding	0.0198807	0.220272	0.0753321	0.0848212	0.112866	0.162262	2.69593	0.20666	0.0940182	4.92889	0.0634504	-3.97823	3.40911e-05	0.0101517	down	yes
MSTRG.29697	TCTEX1D4	ENSSSCT00000054066	GO:0001669(acrosomal vesicle);GO:0005634(nucleus);GO:0005737(cytoplasm);GO:0005815(microtubule organizing center);GO:0005930(axoneme);GO:0008157(protein phosphatase 1 binding);GO:0036126(sperm flagellum)	NA	NA	NA	Tctex1 domain containing 4 [Source:NCBI gene;Acc:606747]	protein_coding	0.045452	0.029841	0.088633	0.05278	0.025165	0.133872	3.94377	0.005764	0.048956	4.27898	0.0287553	-5.12003	3.67217e-05	0.010822	down	yes
MSTRG.10112	TFF3	ENSSSCT00000025513	GO:0005576(extracellular region);GO:0005615(extracellular space);GO:0010906(regulation of glucose metabolic process);GO:0030141(secretory granule);GO:0030277(maintenance of gastrointestinal epithelium)	NA	K22454	NA	trefoil factor 3 [Source:NCBI gene;Acc:100627480]	protein_coding	0.0001	0.0001	0.0001	0.0001	0.0001	0.0001	3.81867	0.0001	0.0001	2.89492	7.44724e-05	-13.7129	3.7069e-05	0.010822	down	yes
MSTRG.2338	CCDC175	ENSSSCT00000026485	NA	NA	NA	NA	coiled-coil domain containing 175 [Source:NCBI gene;Acc:100622158]	protein_coding	0.0386867	0.0767021	0.0977797	0.0727887	0.0866154	0.052229	2.72817	0.026843	0.122279	4.97947	0.0471075	-4.4079	3.96655e-05	0.0114676	down	yes
MSTRG.22201	DRC1	ENSSSCT00000054164;ENSSSCT00000009374	GO:0003352(regulation of cilium movement);GO:0005858(axonemal dynein complex);GO:0005930(axoneme);GO:0007368(determination of left/right symmetry);GO:0007507(heart development);GO:0060285(cilium-dependent cell motility);GO:0070286(axonemal dynein complex assembly);GO:0070286(axonemal dynein complex assembly)	NA	K19754	NA	dynein regulatory complex subunit 1 [Source:NCBI gene;Acc:102159735]	protein_coding	0.0371483	0.0001	0.101245	0.0770045	0.0507303	0.0748862	2.07823	0.12886	0.10013	4.39777	0.0392673	-4.67053	4.02487e-05	0.0114721	down	yes
MSTRG.8793	ENSSSCG00000031367	ENSSSCT00000053002	GO:0004806(triglyceride lipase activity);GO:0005789(endoplasmic reticulum membrane);GO:0010898(positive regulation of triglyceride catabolic process);GO:0016020(membrane);GO:0016021(integral component of membrane);GO:0016787(hydrolase activity);GO:0017171(serine hydrolase activity);GO:0052689(carboxylic ester hydrolase activity)	NA	K13616	EC:3.1.1.3	arylacetamide deacetylase-like [Source:NCBI gene;Acc:100623616]	protein_coding	0.091757	0.029088	0.124193	0.067296	0.045148	0.058204	3.12495	0.026214	0.18072	3.83245	0.0494953	-4.33656	4.06749e-05	0.0114721	down	yes
MSTRG.16867	NPSR1	ENSSSCT00000018143	GO:0004930(G protein-coupled receptor activity);GO:0005000(vasopressin receptor activity);GO:0005887(integral component of plasma membrane);GO:0007165(signal transduction);GO:0007186(G protein-coupled receptor signaling pathway);GO:0007218(neuropeptide signaling pathway);GO:0008188(neuropeptide receptor activity);GO:0016020(membrane);GO:0016021(integral component of membrane);GO:0051281(positive …	NA	K08376	NA	neuropeptide S receptor 1 [Source:NCBI gene;Acc:100217399]	protein_coding	1.75659	0.859828	0.247529	1.54823	5.13195	0.177317	0.199012	0.155799	0.214143	0.751537	6.37207	2.67176	4.12188e-05	0.0114721	up	yes
MSTRG.8155	SNTN	ENSSSCT00000012575	GO:0046914(transition metal ion binding)	NA	NA	NA	sentan, cilia apical structure protein [Source:NCBI gene;Acc:100519514]	protein_coding	0.0001	0.0001	0.0001	0.0001	0.0001	0.0001	3.9872	0.0001	0.0001	6.31629	4.85258e-05	-14.3309	4.40955e-05	0.0121581	down	yes
MSTRG.3500	SPACA9	ENSSSCT00000024407;ENSSSCT00000006305	GO:0001669(acrosomal vesicle);GO:0005737(cytoplasm);GO:0005881(cytoplasmic microtubule);GO:0036064(ciliary basal body);GO:0036126(sperm flagellum);GO:0048306(calcium-dependent protein binding);GO:0097546(ciliary base);GO:0097546(ciliary base)	NA	NA	NA	sperm acrosome associated 9 [Source:NCBI gene;Acc:100151892]	protein_coding	0.12404	0.342727	0.429808	0.240879	0.299582	0.605109	5.21125	0.303961	0.377704	8.67534	0.0947077	-3.40037	4.56126e-05	0.0122607	down	yes
MSTRG.9662	ENSSSCG00000021271;ENSSSCG00000033462;ENSSSCG00000033467	ENSSSCT00000029357;ENSSSCT00000056864;ENSSSCT00000060741;ENSSSCT00000049276	GO:0005515(protein binding)	NA	NA	NA		protein_coding	0.190208	0.0919897	0.480977	0.37585	0.207183	0.475541	4.62641	0.371648	0.392413	4.87625	0.125319	-2.99632	4.75966e-05	0.0123246	down	yes
MSTRG.19234	PCSK1	ENSSSCT00000015478	GO:0004175(endopeptidase activity);GO:0004252(serine-type endopeptidase activity);GO:0005615(extracellular space);GO:0006508(proteolysis);GO:0008233(peptidase activity);GO:0008236(serine-type peptidase activity);GO:0016020(membrane);GO:0016485(protein processing);GO:0016486(peptide hormone processing);GO:0016787(hydrolase activity);GO:0042802(identical protein binding);GO:0043005(neuron projectio…	NA	K01359	EC:3.4.21.93	proprotein convertase subtilisin/kexin type 1 [Source:NCBI gene;Acc:397103]	protein_coding	0.193532	0.756586	0.111358	0.200022	0.227846	0.248254	99.4428	0.366069	0.103432	0.236892	0.0148345	-6.0749	5.22309e-05	0.0132399	down	yes
MSTRG.26486	DYNLRB2	ENSSSCT00000055825	GO:0003774(motor activity);GO:0005737(cytoplasm);GO:0005856(cytoskeleton);GO:0005868(cytoplasmic dynein complex);GO:0005874(microtubule);GO:0007018(microtubule-based movement);GO:0030286(dynein complex);GO:0045505(dynein intermediate chain binding)	NA	K10419	NA	dynein light chain roadblock-type 2 [Source:NCBI gene;Acc:102165562]	protein_coding	0.328814	0.263694	0.235698	1.01618	0.471708	1.46513	10.8664	0.814747	1.25122	6.43759	0.111163	-3.16925	5.29098e-05	0.0132399	down	yes
MSTRG.13718	DNAH7	ENSSSCT00000043415	GO:0003341(cilium movement);GO:0003777(microtubule motor activity);GO:0005509(calcium ion binding);GO:0005524(ATP binding);GO:0005829(cytosol);GO:0005929(cilium);GO:0007018(microtubule-based movement);GO:0030286(dynein complex);GO:0036156(inner dynein arm);GO:0036159(inner dynein arm assembly)	05016(Huntington disease)	K10408	NA	dynein axonemal heavy chain 7 [Source:NCBI gene;Acc:100157866]	protein_coding	0.0864432	0.190532	0.218808	0.0941479	0.324381	0.203757	3.54534	0.223033	0.237824	4.61175	0.103643	-3.2703	5.74945e-05	0.0140334	down	yes
MSTRG.22705	MAL2	ENSSSCT00000006587	GO:0016020(membrane);GO:0016021(integral component of membrane);GO:0019911(structural constituent of myelin sheath);GO:0042552(myelination);GO:0045056(transcytosis);GO:0045121(membrane raft)	NA	NA	NA	mal, T cell differentiation protein 2 [Source:NCBI gene;Acc:100153186]	protein_coding	3.24093	1.83517	0.67847	2.96879	1.68936	10.8584	14.0265	6.35284	3.93061	5.23154	0.257741	-1.956	5.91826e-05	0.014328	down	yes
MSTRG.28286	KLHDC7A	ENSSSCT00000025341	GO:0005515(protein binding)	NA	NA	NA	kelch domain containing 7A [Source:NCBI gene;Acc:100622416]	protein_coding	0.022802	0.060116	0.147106	0.167453	0.053632	0.081031	1.81504	0.094828	0.146843	4.48441	0.0681212	-3.87575	6.41337e-05	0.0150376	down	yes
MSTRG.26009	CFAP54	ENSSSCT00000046260;ENSSSCT00000045047	GO:0007283(spermatogenesis);GO:0060271(cilium assembly);GO:0060294(cilium movement involved in cell motility);GO:0060294(cilium movement involved in cell motility)	NA	NA	NA	cilia and flagella associated protein 54 [Source:NCBI gene;Acc:102161224]	protein_coding	0.0208028	0.0459908	0.261399	0.105647	0.131977	0.108031	2.94436	0.137185	0.106037	5.29106	0.0658948	-3.92369	6.56781e-05	0.0152794	down	yes
MSTRG.32441	SLC34A2	ENSSSCT00000009582	GO:0001701(in utero embryonic development);GO:0005436(sodium:phosphate symporter activity);GO:0005886(plasma membrane);GO:0005903(brush border);GO:0006817(phosphate ion transport);GO:0015321(sodium-dependent phosphate transmembrane transporter activity);GO:0016020(membrane);GO:0016021(integral component of membrane);GO:0016324(apical plasma membrane);GO:0030643(cellular phosphate ion homeostasis)…	04928(Parathyroid hormone synthesis, secretion and action)	K14683	NA	solute carrier family 34 member 2 [Source:NCBI gene;Acc:641347]	protein_coding	0.368733	0.193545	0.333057	0.444687	0.557743	0.606993	7.15109	0.527547	0.128316	14.0472	0.0844909	-3.56506	6.88914e-05	0.0157824	down	yes
MSTRG.29274	WDR78	ENSSSCT00000025606;ENSSSCT00000039145	GO:0002244(hematopoietic progenitor cell differentiation);GO:0003341(cilium movement);GO:0005515(protein binding);GO:0005858(axonemal dynein complex);GO:0007018(microtubule-based movement);GO:0008574(ATP-dependent microtubule motor activity, plus-end-directed);GO:0030286(dynein complex);GO:0045503(dynein light chain binding);GO:0045504(dynein heavy chain binding);GO:0045504(dynein heavy chain bin…	NA	NA	NA	WD repeat domain 78 [Source:NCBI gene;Acc:100620493]	protein_coding	0.130772	0.123865	0.19615	0.218423	0.0792671	0.370672	2.38833	0.174459	0.278018	2.37744	0.133922	-2.90054	6.94082e-05	0.0157824	down	yes
MSTRG.29109	LPAR3	ENSSSCT00000004158	GO:0000187(activation of MAPK activity);GO:0004930(G protein-coupled receptor activity);GO:0005886(plasma membrane);GO:0007165(signal transduction);GO:0007186(G protein-coupled receptor signaling pathway);GO:0016020(membrane);GO:0016021(integral component of membrane);GO:0030424(axon);GO:0032060(bleb assembly);GO:0043410(positive regulation of MAPK cascade);GO:0048672(positive regulation of colla…	04015(Rap1 signaling pathway);04072(Phospholipase D signaling pathway);04080(Neuroactive ligand-receptor interaction);04151(PI3K-Akt signaling pathway);05200(Pathways in cancer)	K04294	NA	lysophosphatidic acid receptor 3 [Source:NCBI gene;Acc:100113360]	protein_coding	0.0001	0.105007	0.074477	0.015509	0.046239	0.109784	2.21647	0.039681	0.075404	4.91206	0.0328191	-4.92932	6.99601e-05	0.0157824	down	yes
MSTRG.469	MYB	ENSSSCT00000048083;ENSSSCT00000027213;ENSSSCT00000004606	GO:0000122(negative regulation of transcription by RNA polymerase II);GO:0000278(mitotic cell cycle);GO:0000978(RNA polymerase II proximal promoter sequence-specific DNA binding);GO:0003677(DNA binding);GO:0006338(chromatin remodeling);GO:0006355(regulation of transcription, DNA-templated);GO:0045624(positive regulation of T-helper cell differentiation);GO:0045892(negative regulation of transcrip…	04151(PI3K-Akt signaling pathway);04151(PI3K-Akt signaling pathway)	K09420	NA	MYB proto-oncogene, transcription factor [Source:NCBI gene;Acc:100152439]	protein_coding	0.167988	0.030255	0.0856704	0.101711	0.136506	0.374134	1.44079	0.160021	0.105673	2.48587	0.11434	-3.1286	7.17048e-05	0.0159782	down	yes
ENSSSCG00000034547	ENSSSCG00000034547	ENSSSCT00000057284	GO:0005515(protein binding)	NA	NA	NA	tetratricopeptide repeat domain 34 [Source:NCBI gene;Acc:100626203]	protein_coding	0.048796	0.050115	0.054401	0.054318	0.017003	0.071601	0.834038	0.055327	0.048102	1.9018	0.0771704	-3.69581	7.54075e-05	0.0166332	down	yes
MSTRG.30299	SFTA2	ENSSSCT00000056248	NA	NA	NA	NA	surfactant associated 2 [Source:NCBI gene;Acc:100520390]	protein_coding	0.0001	0.0001	0.0001	0.0001	0.0001	0.0001	1.21529	0.0001	0.0001	2.18063	0.000147223	-12.7297	7.71037e-05	0.0168823	down	yes
MSTRG.28318	UBXN10	ENSSSCT00000003886	GO:0005515(protein binding);GO:0005929(cilium);GO:0030992(intraciliary transport particle B);GO:0060271(cilium assembly)	NA	NA	NA	UBX domain protein 10 [Source:NCBI gene;Acc:100514294]	protein_coding	0.142942	0.392973	0.242628	0.061703	0.092885	0.234698	4.72305	0.163975	0.177562	8.95594	0.0654589	-3.93327	8.46737e-05	0.0180101	down	yes
MSTRG.30713	SPATS1	ENSSSCT00000048349	NA	NA	NA	NA	spermatogenesis associated serine rich 1 [Source:HGNC Symbol;Acc:HGNC:22957]	protein_coding	0.072151	0.0415087	0.0001	0.0445894	0.119317	0.163601	1.02667	0.234935	0.212164	1.58078	0.0862816	-3.5348	8.76263e-05	0.0185059	down	yes
MSTRG.32053	AK7	ENSSSCT00000002782	GO:0004017(adenylate kinase activity);GO:0004127(cytidylate kinase activity);GO:0004550(nucleoside diphosphate kinase activity);GO:0005524(ATP binding);GO:0006139(nucleobase-containing compound metabolic process);GO:0006165(nucleoside diphosphate phosphorylation);GO:0009142(nucleoside triphosphate biosynthetic process);GO:0019205(nucleobase-containing compound kinase activity);GO:0046940(nucleosi…	00230(Purine metabolism);00730(Thiamine metabolism)	K00939	EC:2.7.4.3	adenylate kinase 7 [Source:NCBI gene;Acc:100152573]	protein_coding	0.097615	0.045139	0.151439	0.032326	0.008031	0.04444	2.78804	0.038654	0.1056	5.05788	0.0416386	-4.58593	9.82856e-05	0.0201534	down	yes
MSTRG.15675	TTLL9	ENSSSCT00000052088;ENSSSCT00000007917	GO:0006464(cellular protein modification process);GO:0006464(cellular protein modification process)	NA	K16603	EC:6.-.-.-	tubulin tyrosine ligase like 9 [Source:NCBI gene;Acc:100739146]	protein_coding	0.0001	0.0133967	0.0483295	0.0001	0.0001	0.0191925	1.24049	0.0291729	0.0322901	2.38335	0.0167435	-5.90026	9.85014e-05	0.0201534	down	yes
MSTRG.29407	TACSTD2	ENSSSCT00000004241	GO:0005615(extracellular space);GO:0005634(nucleus);GO:0005886(plasma membrane);GO:0005923(bicellular tight junction);GO:0009925(basal plasma membrane);GO:0010633(negative regulation of epithelial cell migration);GO:0016020(membrane);GO:0016021(integral component of membrane);GO:0016328(lateral plasma membrane);GO:0050678(regulation of epithelial cell proliferation);GO:0051497(negative regulation…	NA	K17288	NA	tumor associated calcium signal transducer 2 [Source:NCBI gene;Acc:100510966]	protein_coding	0.184592	0.148732	0.587767	0.736698	0.307718	0.619025	10.6375	0.164515	0.353976	16.5892	0.0692953	-3.8511	9.93815e-05	0.0201534	down	yes
MSTRG.8461	EFCAB12	ENSSSCT00000012683	GO:0005509(calcium ion binding)	NA	NA	NA	EF-hand calcium binding domain 12 [Source:NCBI gene;Acc:100511535]	protein_coding	0.070472	0.0001	0.068315	0.064019	0.070149	0.060301	1.91932	0.069184	0.130655	3.61668	0.0471098	-4.40783	0.000105159	0.0210271	down	yes
ENSSSCG00000009354	CCNA1	ENSSSCT00000059563;ENSSSCT00000045284;ENSSSCT00000010251	GO:0000079(regulation of cyclin-dependent protein serine/threonine kinase activity);GO:0000278(mitotic cell cycle);GO:0000307(cyclin-dependent protein kinase holoenzyme complex);GO:0004672(protein kinase activity);GO:0005634(nucleus);GO:0005737(cytoplasm);GO:0006468(protein phosphorylation);GO:0007088(regulation of mitotic nuclear division);GO:0008284(positive regulation of cell population prolif…	04110(Cell cycle);04152(AMPK signaling pathway);04218(Cellular senescence);04914(Progesterone-mediated oocyte maturation);05161(Hepatitis B);05165(Human papillomavirus infection);05166(Human T-cell leukemia virus 1 infection);05169(Epstein-Barr virus infection);05203(Viral carcinogenesis);05203(Viral carcinogenesis)	K06627	NA	cyclin A1 [Source:NCBI gene;Acc:100156017]	protein_coding	0.053435	0.110649	0.051947	0.0001	0.098514	0.116548	2.065	0.154349	0.293923	1.51591	0.0758961	-3.71983	0.000105779	0.0210271	down	yes
ENSSSCG00000015741	CFAP221	ENSSSCT00000017141	GO:0003341(cilium movement);GO:0005516(calmodulin binding);GO:0005929(cilium);GO:0044458(motile cilium assembly);GO:0060271(cilium assembly)	NA	NA	NA	cilia and flagella associated protein 221 [Source:NCBI gene;Acc:100521408]	protein_coding	0.011483	0.084229	0.083665	0.068579	0.023609	0.051538	1.0373	0.079863	0.270684	1.72962	0.0856941	-3.54466	0.000105919	0.0210271	down	yes
MSTRG.24033	OVGP1;WDR77	ENSSSCT00000048552;ENSSSCT00000007439;ENSSSCT00000062603;ENSSSCT00000007438;ENSSSCT00000065402;ENSSSCT00000063614	GO:0004568(chitinase activity);GO:0005576(extracellular region);GO:0005737(cytoplasm);GO:0005975(carbohydrate metabolic process);GO:0006032(chitin catabolic process);GO:0008061(chitin binding);GO:0005515(protein binding);GO:0005634(nucleus);GO:0005654(nucleoplasm);GO:0005794(Golgi apparatus);GO:0005829(cytosol);GO:0006357(regulation of transcription by RNA polymerase II);GO:0008284(positive regul…	NA	K17526;K13221	NA	oviductal glycoprotein 1 [Source:NCBI gene;Acc:397140];WD repeat domain 77 [Source:NCBI gene;Acc:100156038]	protein_coding	3.12272	1.9896	1.92912	2.24225	2.75525	2.49885	20.5524	2.10581	2.84309	63.597	0.131434	-2.92759	0.000106784	0.0210583	down	yes
MSTRG.20711	DNAH3	ENSSSCT00000060309	GO:0003777(microtubule motor activity);GO:0005524(ATP binding);GO:0007018(microtubule-based movement);GO:0030286(dynein complex)	05016(Huntington disease)	K10408	NA	dynein axonemal heavy chain 3 [Source:NCBI gene;Acc:100738073]	protein_coding	0.207501	0.158484	0.574247	0.24078	0.153653	0.22457	3.57917	0.256571	0.580391	5.67965	0.129324	-2.95094	0.000111025	0.0216086	down	yes
MSTRG.5728	FOXJ1	ENSSSCT00000018712	GO:0000122(negative regulation of transcription by RNA polymerase II);GO:0000976(transcription regulatory region sequence-specific DNA binding);GO:0000978(RNA polymerase II proximal promoter sequence-specific DNA binding);GO:0001228(DNA-binding transcription activator activity, RNA polymerase II-specific);GO:0002508(central tolerance induction);GO:0002635(negative regulation of germinal center fo…	NA	K09402	NA	forkhead box J1 [Source:NCBI gene;Acc:100623071]	protein_coding	0.0001	0.0488171	0.211785	0.0261735	0.0001	0.0618132	5.81683	0.0421021	0.122772	14.1472	0.0142132	-6.13662	0.000118624	0.0225247	down	yes
MSTRG.30050	DCDC2	ENSSSCT00000001180	GO:0001764(neuron migration);GO:0005654(nucleoplasm);GO:0005737(cytoplasm);GO:0005815(microtubule organizing center);GO:0005829(cytosol);GO:0005874(microtubule);GO:0005929(cilium);GO:0005930(axoneme);GO:0007605(sensory perception of sound);GO:0015630(microtubule cytoskeleton);GO:0030111(regulation of Wnt signaling pathway);GO:0030864(cortical actin cytoskeleton);GO:0035556(intracellular signal tr…	NA	NA	NA	doublecortin domain containing 2 [Source:NCBI gene;Acc:100153025]	protein_coding	0.0285696	0.0166612	0.103778	0.199642	0.15891	0.0983552	3.69074	0.045965	0.0979641	5.47551	0.0539469	-4.21232	0.000118758	0.0225247	down	yes
MSTRG.27702	TMC4	ENSSSCT00000003627	GO:0005216(ion channel activity);GO:0005887(integral component of plasma membrane);GO:0008381(mechanosensitive ion channel activity);GO:0016020(membrane);GO:0016021(integral component of membrane);GO:0034220(ion transmembrane transport);GO:0055085(transmembrane transport)	NA	K21988	NA	transmembrane channel like 4 [Source:NCBI gene;Acc:100521320]	protein_coding	0.0001	0.026408	0.081739	0.077292	0.0001	0.19692	1.59746	0.037796	0.12818	2.57406	0.04094	-4.61035	0.000128091	0.0239892	down	yes
MSTRG.30757	ANKRD66	ENSSSCT00000048991	GO:0005515(protein binding)	NA	NA	NA	ankyrin repeat domain 66 [Source:NCBI gene;Acc:100155360]	protein_coding	0.080593	0.005457	0.116527	0.02574	0.020493	0.089479	1.94015	0.042782	0.019325	3.16249	0.0473542	-4.40036	0.000132411	0.0246434	down	yes
MSTRG.22384	RSAD2	ENSSSCT00000009461;ENSSSCT00000050256	GO:0001650(fibrillar center);GO:0003824(catalytic activity);GO:0005739(mitochondrion);GO:0005741(mitochondrial outer membrane);GO:0005743(mitochondrial inner membrane);GO:0005783(endoplasmic reticulum);GO:0005789(endoplasmic reticulum membrane);GO:0005811(lipid droplet);GO:0009615(response to virus);GO:0034157(positive regulation of toll-like receptor 7 signaling pathway);GO:0034165(positive regu…	05160(Hepatitis C);05164(Influenza A);05164(Influenza A)	K15045	NA	radical S-adenosyl methionine domain containing 2 [Source:NCBI gene;Acc:396752]	protein_coding	0.234268	0.289817	0.490841	35.6099	0.205769	0.206094	0.396824	0.166641	0.192972	0.642749	22.9434	4.52001	0.000139584	0.0250215	up	yes
MSTRG.7089	CFAP52	ENSSSCT00000019583	GO:0005515(protein binding)	NA	NA	NA	cilia and flagella associated protein 52 [Source:NCBI gene;Acc:100516337]	protein_coding	0.271102	0.48755	0.566012	0.467901	0.347942	0.383974	3.44061	1.32061	0.780885	5.95784	0.180118	-2.47299	0.000143758	0.0254142	down	yes
MSTRG.6910	TEKT1	ENSSSCT00000019461;ENSSSCT00000055293	GO:0015630(microtubule cytoskeleton);GO:0030317(flagellated sperm motility);GO:0036126(sperm flagellum);GO:0060271(cilium assembly);GO:0060294(cilium movement involved in cell motility);GO:0060294(cilium movement involved in cell motility)	NA	K18628	NA	tektin 1 [Source:NCBI gene;Acc:100520803]	protein_coding	0.0371954	0.0900195	0.068217	0.0001	0.0984283	0.0701074	1.99215	0.0456209	0.166426	3.4991	0.0509163	-4.29573	0.000144234	0.0254142	down	yes
MSTRG.27091	ENSSSCG00000002857	ENSSSCT00000003158	GO:0003674(molecular_function);GO:0003676(nucleic acid binding);GO:0005524(ATP binding);GO:0005575(cellular_component);GO:0008150(biological_process);GO:0046872(metal ion binding)	NA	K18409	EC:3.6.4.13	tudor domain containing 12 [Source:NCBI gene;Acc:102162257]	protein_coding	1.64661	1.95872	3.31057	2.48876	1.62834	0.882788	0.468069	0.917947	0.914539	0.554328	2.95184	1.56161	0.000145613	0.0255062	up	yes
ENSSSCG00000023393	ZBBX	ENSSSCT00000023640;ENSSSCT00000049301	GO:0008270(zinc ion binding);GO:0008270(zinc ion binding)	NA	NA	NA	zinc finger B-box domain containing [Source:NCBI gene;Acc:100155204]	protein_coding	0.14702	0.0963599	0.0242481	0.0263914	0.0714232	0.166839	2.23351	0.0512055	0.0831826	2.40382	0.073998	-3.75637	0.000158581	0.0271308	down	yes
MSTRG.8066	FAM3D	ENSSSCT00000029156	GO:0016020(membrane);GO:0016021(integral component of membrane);GO:0046676(negative regulation of insulin secretion);GO:0070093(negative regulation of glucagon secretion)	NA	NA	NA	family with sequence similarity 3 member D [Source:NCBI gene;Acc:100621654]	protein_coding	0.044179	0.072961	0.505177	0.109849	0.134778	0.068732	5.13761	0.207233	0.363485	8.29015	0.0616287	-4.02025	0.000160316	0.0271308	down	yes
MSTRG.20708	ANKS4B	ENSSSCT00000008600	GO:0005515(protein binding);GO:0005789(endoplasmic reticulum membrane);GO:0005886(plasma membrane);GO:0005902(microvillus);GO:0005903(brush border);GO:0034622(cellular protein-containing complex assembly);GO:0034976(response to endoplasmic reticulum stress);GO:1904106(protein localization to microvillus);GO:1904970(brush border assembly)	NA	K21414	NA	ankyrin repeat and sterile alpha motif domain containing 4B [Source:NCBI gene;Acc:100525512]	protein_coding	0.08166	0.158551	0.325188	0.064539	0.064441	0.395044	3.86187	0.251196	0.069919	2.77659	0.0944139	-3.40486	0.000161394	0.0271308	down	yes
MSTRG.32859	JCHAIN	ENSSSCT00000057491;ENSSSCT00000044293;ENSSSCT00000060871;ENSSSCT00000052505;ENSSSCT00000033582;ENSSSCT00000051517	GO:0002250(adaptive immune response);GO:0003094(glomerular filtration);GO:0003697(single-stranded DNA binding);GO:0005615(extracellular space);GO:0019731(antibacterial humoral response);GO:0019862(IgA binding);GO:0030674(protein binding, bridging);GO:0031210(phosphatidylcholine binding);GO:0032461(positive regulation of protein oligomerization);GO:0034987(immunoglobulin receptor binding);GO:00428…	NA	NA	NA	joining chain of multimeric IgA and IgM [Source:NCBI gene;Acc:100625252]	protein_coding	0.611836	0.942577	0.732831	1.1488	0.585344	2.03587	22.412	1.50766	0.945768	1.43959	0.141893	-2.81712	0.000162176	0.0271308	down	yes
MSTRG.29749	CFAP57	ENSSSCT00000031026	GO:0005515(protein binding);GO:0060285(cilium-dependent cell motility)	NA	NA	NA	cilia and flagella associated protein 57 [Source:HGNC Symbol;Acc:HGNC:26485]	protein_coding	0.0147088	0.0001	0.0427897	0.0101433	0.00600588	0.0170376	0.820361	0.0001	0.0858309	2.22206	0.0234463	-5.4145	0.000165786	0.0275797	down	yes
MSTRG.15981	SLPI	ENSSSCT00000049287	GO:0003677(DNA binding);GO:0003729(mRNA binding);GO:0004866(endopeptidase inhibitor activity);GO:0004867(serine-type endopeptidase inhibitor activity);GO:0005576(extracellular region);GO:0005615(extracellular space);GO:0006955(immune response);GO:0010466(negative regulation of peptidase activity);GO:0010951(negative regulation of endopeptidase activity);GO:0019731(antibacterial humoral response);…	NA	NA	NA	secretory leukocyte peptidase inhibitor [Source:NCBI gene;Acc:396886]	protein_coding	0.209554	0.557108	0.555187	0.579003	1.06907	0.901817	15.9527	0.205541	0.244289	20.9771	0.0775812	-3.68815	0.000167496	0.0277094	down	yes
ENSSSCG00000010008	SEC14L3	ENSSSCT00000062613;ENSSSCT00000050701;ENSSSCT00000010965	NA	NA	NA	NA	SEC14-like protein 3 [Source:NCBI gene;Acc:100156470]	protein_coding	0.0319031	0.0440626	0.0994595	0.0441799	0.0400213	0.056484	1.60439	0.0431088	0.106795	1.24498	0.0849629	-3.55702	0.000168851	0.0277793	down	yes
MSTRG.10115	RSPH1	ENSSSCT00000065774;ENSSSCT00000050089;ENSSSCT00000047923	GO:0000794(condensed nuclear chromosome);GO:0001520(outer dense fiber);GO:0005737(cytoplasm);GO:0007286(spermatid development);GO:0031514(motile cilium);GO:0035082(axoneme assembly);GO:0036126(sperm flagellum);GO:0072687(meiotic spindle);GO:0072687(meiotic spindle)	NA	K19755	NA	radial spoke head component 1 [Source:NCBI gene;Acc:110256495]	protein_coding	0.0330268	0.0409186	0.0502907	0.0253013	0.0001	0.0186217	0.4842	0.00873914	0.0282813	5.38131	0.0252716	-5.30634	0.00018679	0.0303947	down	yes
MSTRG.13809	KIAA2012	ENSSSCT00000058115;ENSSSCT00000048490;ENSSSCT00000059220;ENSSSCT00000017541	NA	NA	NA	NA	KIAA2012 ortholog [Source:NCBI gene;Acc:100513500]	protein_coding	0.0183762	0.00644772	0.0920827	0.037313	0.015912	0.0177714	0.929047	0.0187995	0.0600549	2.14293	0.053693	-4.21912	0.000200431	0.0320655	down	yes
MSTRG.33683	ENSSSCG00000009239	ENSSSCT00000059983;ENSSSCT00000010119	NA	NA	NA	NA	placenta-specific gene 8 protein [Source:NCBI gene;Acc:100524999]	protein_coding	0.0673978	0.0803654	0.231607	0.30456	0.117456	0.394804	2.48872	0.193799	0.199815	2.80621	0.131734	-2.9243	0.000208582	0.0328632	down	yes
MSTRG.16111	BCAS1	ENSSSCT00000065610;ENSSSCT00000045913;ENSSSCT00000066313;ENSSSCT00000043859;ENSSSCT00000044923;ENSSSCT00000044472;ENSSSCT00000064889;ENSSSCT00000055877;ENSSSCT00000008194	GO:0042552(myelination);GO:0042552(myelination)	NA	NA	NA	breast carcinoma amplified sequence 1 [Source:NCBI gene;Acc:100126238]	protein_coding	0.0001	0.0213035	0.042837	0.0336784	0.014707	0.0511505	0.643159	0.0679695	0.00614099	1.19895	0.0572471	-4.12665	0.000217257	0.03405	down	yes
MSTRG.26901	DPEP2	ENSSSCT00000027498;ENSSSCT00000059586	GO:0006508(proteolysis);GO:0008233(peptidase activity);GO:0008235(metalloexopeptidase activity);GO:0008237(metallopeptidase activity);GO:0008239(dipeptidyl-peptidase activity);GO:0016020(membrane);GO:0016787(hydrolase activity);GO:0016805(dipeptidase activity);GO:0031225(anchored component of membrane);GO:0046872(metal ion binding);GO:0046872(metal ion binding)	NA	K01273	EC:3.4.13.19	dipeptidase 2 [Source:NCBI gene;Acc:100621778]	protein_coding	0.434971	0.285619	0.169253	0.513793	0.294658	0.38703	4.82298	0.309198	0.328783	9.59961	0.109939	-3.18523	0.000219559	0.0342305	down	yes
MSTRG.24592	ENSSSCG00000035577	ENSSSCT00000037208	NA	NA	NA	NA		protein_coding	0.12552	0.181948	0.129673	0.115269	0.0900268	0.13306	0.983898	0.128656	0.206919	2.93867	0.146301	-2.77299	0.000235574	0.0363467	down	yes
MSTRG.9367	ENSSSCG00000011850	ENSSSCT00000012962;ENSSSCT00000062547	GO:0005176(ErbB-2 class receptor binding);GO:0007160(cell-matrix adhesion);GO:0010469(regulation of signaling receptor activity);GO:0010669(epithelial structure maintenance);GO:0016020(membrane);GO:0016021(integral component of membrane);GO:0030197(extracellular matrix constituent, lubricant activity);GO:0030197(extracellular matrix constituent, lubricant activity)	NA	K22017	NA	mucin 4, cell surface associated [Source:NCBI gene;Acc:100157344]	protein_coding	0.0564725	0.00898237	0.0859625	0.0294554	0.0001	0.0611724	4.27201	0.0001	0.0379186	4.19782	0.0211194	-5.56528	0.000243485	0.0372654	down	yes
MSTRG.30882	SAXO2	ENSSSCT00000040005	GO:0008017(microtubule binding)	NA	NA	NA	stabilizer of axonemal microtubules 2 [Source:NCBI gene;Acc:100513023]	protein_coding	0.146869	0.060654	0.200986	0.178576	0.108671	0.158896	2.56123	0.206723	0.167265	2.23192	0.130633	-2.93641	0.000244031	0.0372654	down	yes
ENSSSCG00000021956	LY75	ENSSSCT00000032142	GO:0004888(transmembrane signaling receptor activity);GO:0009897(external side of plasma membrane);GO:0016020(membrane);GO:0016021(integral component of membrane)	NA	K06559	NA	lymphocyte antigen 75 [Source:NCBI gene;Acc:595126]	protein_coding	0.191478	0.08853	0.145675	0.299018	0.253663	0.817237	1.16761	0.355394	0.292997	1.533	0.234832	-2.0903	0.000252229	0.0383208	down	yes
MSTRG.29748	FAM183A	ENSSSCT00000004373	GO:0097546(ciliary base)	NA	NA	NA	family with sequence similarity 183 member A [Source:NCBI gene;Acc:100520438]	protein_coding	0.0001	0.0001	0.078513	0.0001	0.0001	0.0001	5.65876	0.0001	0.064853	6.25062	0.00659013	-7.24548	0.000259769	0.0388714	down	yes
MSTRG.14229	ANKMY1	ENSSSCT00000017820;ENSSSCT00000043830	GO:0005515(protein binding);GO:0005515(protein binding)	NA	NA	NA	ankyrin repeat and MYND domain containing 1 [Source:NCBI gene;Acc:100526143]	protein_coding	0.0937565	0.167619	0.0787117	0.102638	0.0673832	0.413879	0.355117	0.214312	0.157512	1.5649	0.18853	-2.40714	0.000298637	0.0439991	down	yes
MSTRG.7957	DNAH1	ENSSSCT00000025398	GO:0003341(cilium movement);GO:0003351(epithelial cilium movement);GO:0003777(microtubule motor activity);GO:0005524(ATP binding);GO:0005858(axonemal dynein complex);GO:0005930(axoneme);GO:0007018(microtubule-based movement);GO:0007288(sperm axoneme assembly);GO:0008569(ATP-dependent microtubule motor activity, minus-end-directed);GO:0016887(ATPase activity);GO:0030286(dynein complex);GO:0030317(…	05016(Huntington disease)	K10408	NA	dynein axonemal heavy chain 1 [Source:NCBI gene;Acc:100156016]	protein_coding	0.154013	0.263109	0.452411	0.273639	0.208604	0.263084	3.28666	0.173274	0.410715	4.48385	0.156863	-2.67243	0.000299441	0.0439991	down	yes
MSTRG.12489	DMBT1	ENSSSCT00000003311;ENSSSCT00000035960	GO:0005044(scavenger receptor activity);GO:0005576(extracellular region);GO:0006898(receptor-mediated endocytosis);GO:0009897(external side of plasma membrane);GO:0016020(membrane);GO:0016021(integral component of membrane);GO:0031012(extracellular matrix);GO:0031012(extracellular matrix)	04970(Salivary secretion);04970(Salivary secretion)	K13912	NA	deleted in malignant brain tumors 1 [Source:NCBI gene;Acc:751862]	protein_coding	0.0110312	0.0001	0.0744332	0.00780978	0.0001	0.0001	4.23386	0.0001	0.0136796	23.4213	0.00337829	-8.20949	0.000317469	0.046115	down	yes
MSTRG.15478	CFAP61	ENSSSCT00000047663	NA	NA	NA	NA	cilia and flagella associated protein 61 [Source:NCBI gene;Acc:100511790]	protein_coding	0.327948	0.0907277	0.105116	0.0306762	0.0415918	0.114018	2.73624	0.0339809	0.207581	5.18289	0.0720339	-3.79518	0.000333057	0.0474535	down	yes
MSTRG.20352	CLDN4	ENSSSCT00000033656	GO:0005198(structural molecule activity);GO:0005254(chloride channel activity);GO:0005886(plasma membrane);GO:0005887(integral component of plasma membrane);GO:0005923(bicellular tight junction);GO:0016020(membrane);GO:0016021(integral component of membrane);GO:0016327(apicolateral plasma membrane);GO:0030054(cell junction);GO:0061436(establishment of skin barrier);GO:0070293(renal absorption)	04514(Cell adhesion molecules (CAMs));04530(Tight junction);04670(Leukocyte transendothelial migration);05160(Hepatitis C)	K06087	NA	claudin 4 [Source:NCBI gene;Acc:733578]	protein_coding	0.170107	0.124629	0.518511	0.197237	0.158551	0.314595	5.44247	0.134707	0.0633196	8.62035	0.0802058	-3.64015	0.00034092	0.0483424	down	yes
MSTRG.24484	RIBC2	ENSSSCT00000000010	NA	NA	NA	NA	RIB43A domain with coiled-coils 2 [Source:NCBI gene;Acc:100519482]	protein_coding	0.012196	0.010839	0.0001	0.0001	0.0001	0.0001	1.13293	0.0001	0.022379	1.59179	0.00849379	-6.87938	0.000345192	0.0487162	down	yes
MSTRG.6107	KRT14	ENSSSCT00000018994;ENSSSCT00000064325;ENSSSCT00000056005;ENSSSCT00000059817;ENSSSCT00000043196;ENSSSCT00000047854;ENSSSCT00000063684;ENSSSCT00000057740;ENSSSCT00000057854;ENSSSCT00000046727	GO:0005198(structural molecule activity);GO:0005634(nucleus);GO:0005737(cytoplasm);GO:0005882(intermediate filament);GO:0007568(aging);GO:0030855(epithelial cell differentiation);GO:0042633(hair cycle);GO:0045095(keratin filament);GO:0045110(intermediate filament bundle assembly);GO:0045178(basal part of cell);GO:0071944(cell periphery);GO:1990254(keratin filament binding);GO:1990254(keratin fila…	04915(Estrogen signaling pathway);04915(Estrogen signaling pathway)	K07604	NA	keratin, type I cytoskeletal 14 [Source:NCBI gene;Acc:110255312]	protein_coding	0.147615	0.174006	0.401124	0.3441	0.339145	0.408577	2.95022	0.0824533	0.297522	8.27958	0.116987	-3.09558	0.000353068	0.0495928	down	yes
MSTRG.648	RSPH4A	ENSSSCT00000024566;ENSSSCT00000031991	GO:0003341(cilium movement);GO:0005634(nucleus);GO:0005654(nucleoplasm);GO:0005730(nucleolus);GO:0005930(axoneme);GO:0035082(axoneme assembly);GO:0035082(axoneme assembly)	NA	K19756	NA	radial spoke head component 4A [Source:NCBI gene;Acc:100524228]	protein_coding	0.264324	0.416464	0.621352	0.293938	0.383194	0.462133	3.82799	0.433024	0.579514	6.01596	0.174869	-2.51566	0.000364118	0.0506668	down	yes
MSTRG.21532	TACR1	ENSSSCT00000047546	GO:0004930(G protein-coupled receptor activity);GO:0004995(tachykinin receptor activity);GO:0005886(plasma membrane);GO:0007165(signal transduction);GO:0007186(G protein-coupled receptor signaling pathway);GO:0007204(positive regulation of cytosolic calcium ion concentration);GO:0007217(tachykinin receptor signaling pathway);GO:0016020(membrane);GO:0016021(integral component of membrane);GO:00164…	04020(Calcium signaling pathway);04080(Neuroactive ligand-receptor interaction)	K04222	NA	tachykinin receptor 1 [Source:NCBI gene;Acc:110259991]	protein_coding	0.091372	0.014231	0.090679	0.173155	0.064806	0.238112	1.60622	0.06371	0.029118	2.73348	0.092973	-3.42704	0.000379426	0.0525514	down	yes
ENSSSCG00000026861	NECTIN4	ENSSSCT00000028387;ENSSSCT00000006978	GO:0005886(plasma membrane);GO:0005913(cell-cell adherens junction);GO:0007155(cell adhesion);GO:0007156(homophilic cell adhesion via plasma membrane adhesion molecules);GO:0007157(heterophilic cell-cell adhesion via plasma membrane cell adhesion molecules);GO:0016020(membrane);GO:0016021(integral component of membrane);GO:0038023(signaling receptor activity);GO:0042802(identical protein binding)…	04520(Adherens junction);04520(Adherens junction)	K06593	NA	nectin cell adhesion molecule 4 [Source:NCBI gene;Acc:100154054]	protein_coding	0.0001	0.0318406	0.0290909	0.0001	0.00944308	0.0487059	0.921916	0.0001	0.0570358	1.18426	0.0319051	-4.97007	0.000390926	0.0532798	down	yes
MSTRG.6362	ANKFN1	ENSSSCT00000019171	GO:0005515(protein binding)	NA	NA	NA	ankyrin repeat and fibronectin type III domain containing 1 [Source:NCBI gene;Acc:100525181]	protein_coding	0.0001	0.014988	0.091319	0.025096	0.0001	0.017673	1.47575	0.03789	0.020082	2.82307	0.0300844	-5.05484	0.000421629	0.0568111	down	yes
MSTRG.14086	SPHKAP	ENSSSCT00000054594;ENSSSCT00000065098;ENSSSCT00000017701	GO:0005737(cytoplasm);GO:0005739(mitochondrion);GO:0051018(protein kinase A binding);GO:0051018(protein kinase A binding)	NA	NA	NA	SPHK1 interactor, AKAP domain containing [Source:NCBI gene;Acc:100515691]	protein_coding	0.0001	0.0107899	0.135006	0.0210536	0.0904568	0.0269809	5.44374	0.0785003	0.0587609	0.749481	0.0404888	-4.62633	0.00043077	0.0577814	down	yes
MSTRG.13781	ALS2CR12	ENSSSCT00000017535;ENSSSCT00000049815;ENSSSCT00000048748	NA	NA	NA	NA	amyotrophic lateral sclerosis 2 chromosome region 12 [Source:NCBI gene;Acc:100625172]	protein_coding	0.0240003	0.0001	0.0116455	0.0001	0.0001	0.0001	1.54518	0.0001	0.0283896	2.03587	0.00995828	-6.64989	0.000436806	0.0583283	down	yes
MSTRG.9455	ILDR1	ENSSSCT00000026283	GO:0005886(plasma membrane);GO:0006898(receptor-mediated endocytosis);GO:0016020(membrane);GO:0016021(integral component of membrane);GO:0032991(protein-containing complex);GO:0042802(identical protein binding);GO:0051260(protein homooligomerization);GO:0061689(tricellular tight junction);GO:0070506(high-density lipoprotein particle receptor activity);GO:0090277(positive regulation of peptide hor…	NA	NA	NA	immunoglobulin like domain containing receptor 1 [Source:NCBI gene;Acc:100620323]	protein_coding	0.0591237	0.0733612	0.193879	0.11145	0.132623	0.121178	1.79493	0.0733333	0.178299	2.04333	0.135461	-2.88405	0.000470335	0.0612178	down	yes
MSTRG.14013	ENSSSCG00000016215	ENSSSCT00000017657	GO:0000166(nucleotide binding);GO:0000226(microtubule cytoskeleton organization);GO:0000278(mitotic cell cycle);GO:0003924(GTPase activity);GO:0005200(structural constituent of cytoskeleton);GO:0005525(GTP binding);GO:0005737(cytoplasm);GO:0005856(cytoskeleton);GO:0005874(microtubule);GO:0007017(microtubule-based process)	04145(Phagosome);04210(Apoptosis);04530(Tight junction);04540(Gap junction)	K07374	NA	tubulin alpha-1D chain [Source:NCBI gene;Acc:100158003]	protein_coding	0.378548	0.20109	0.621118	0.354131	0.215289	0.386061	4.12466	0.453936	0.637481	4.99216	0.167087	-2.58133	0.000471937	0.0612178	down	yes
MSTRG.6657	SLC13A2	ENSSSCT00000019335	GO:0005215(transporter activity);GO:0006814(sodium ion transport);GO:0016020(membrane);GO:0016021(integral component of membrane);GO:0055085(transmembrane transport)	NA	K14445	NA	solute carrier family 13 member 2 [Source:NCBI gene;Acc:100512737]	protein_coding	0.0001	0.0001	0.021322	0.0001	0.0001	0.0001	0.55077	0.027416	0.0001	0.773559	0.0160672	-5.95974	0.00048316	0.0622837	down	yes
MSTRG.7113	DNAH9	ENSSSCT00000019610	GO:0003777(microtubule motor activity);GO:0005524(ATP binding);GO:0005930(axoneme);GO:0007018(microtubule-based movement);GO:0008569(ATP-dependent microtubule motor activity, minus-end-directed);GO:0030286(dynein complex);GO:0045503(dynein light chain binding);GO:0045505(dynein intermediate chain binding);GO:0051959(dynein light intermediate chain binding);GO:0097729(9+2 motile cilium);GO:0120135…	05016(Huntington disease)	K10408	NA	dynein axonemal heavy chain 9 [Source:NCBI gene;Acc:100518397]	protein_coding	0.694133	0.674607	1.56655	1.76973	1.15678	2.00348	4.51498	2.19376	1.3661	8.76553	0.311072	-1.68468	0.000496928	0.0624368	down	yes
MSTRG.32472	DTHD1	ENSSSCT00000028675	GO:0005515(protein binding);GO:0007165(signal transduction)	NA	NA	NA	death domain containing 1 [Source:NCBI gene;Acc:100521908]	protein_coding	0.014665	0.116803	0.100294	0.031464	0.0001	0.108596	2.6017	0.0001	0.085962	4.90515	0.0341915	-4.87022	0.000514557	0.0641108	down	yes
MSTRG.34807	ENSSSCG00000028674	ENSSSCT00000028859;ENSSSCT00000048169;ENSSSCT00000058662;ENSSSCT00000050057	GO:0016020(membrane);GO:0016021(integral component of membrane);GO:0016021(integral component of membrane)	NA	NA	NA		protein_coding	0.126124	0.319819	0.161342	0.159653	0.243008	0.312274	3.97717	0.256335	0.202162	1.21863	0.169268	-2.56262	0.000518304	0.0643086	down	yes
MSTRG.7055	DNAH2	ENSSSCT00000019547	GO:0003777(microtubule motor activity);GO:0005524(ATP binding);GO:0007018(microtubule-based movement);GO:0008569(ATP-dependent microtubule motor activity, minus-end-directed);GO:0030286(dynein complex);GO:0031514(motile cilium);GO:0045503(dynein light chain binding);GO:0045505(dynein intermediate chain binding);GO:0051959(dynein light intermediate chain binding)	05016(Huntington disease)	K10408	NA	dynein axonemal heavy chain 2 [Source:NCBI gene;Acc:100511777]	protein_coding	0.495569	1.28921	0.781615	0.54469	1.72181	0.902887	3.07663	1.25506	4.92362	7.77469	0.269499	-1.89165	0.000532341	0.0657761	down	yes
MSTRG.14403	PRLR	ENSSSCT00000036206;ENSSSCT00000018325	GO:0004925(prolactin receptor activity);GO:0005515(protein binding);GO:0007171(activation of transmembrane receptor protein tyrosine kinase activity);GO:0009986(cell surface);GO:0016020(membrane);GO:0016021(integral component of membrane);GO:0017046(peptide hormone binding);GO:0038161(prolactin signaling pathway);GO:0046872(metal ion binding);GO:0046872(metal ion binding)	04060(Cytokine-cytokine receptor interaction);04080(Neuroactive ligand-receptor interaction);04151(PI3K-Akt signaling pathway);04630(Jak-STAT signaling pathway);04917(Prolactin signaling pathway);04917(Prolactin signaling pathway)	K05081	NA	prolactin receptor [Source:NCBI gene;Acc:414916]	protein_coding	0.0995034	0.368462	0.822326	0.172511	0.137573	2.29888	4.28753	1.61375	0.0988521	1.22371	0.168059	-2.57296	0.000544591	0.0668426	down	yes
MSTRG.7470	NEK10	ENSSSCT00000012283	GO:0004672(protein kinase activity);GO:0005524(ATP binding);GO:0006468(protein phosphorylation)	NA	K20879	EC:2.7.11.1	NIMA related kinase 10 [Source:NCBI gene;Acc:100622627]	protein_coding	0.224529	0.186078	0.228557	0.132775	0.483483	0.404755	2.1265	0.353749	0.311794	3.30333	0.193138	-2.3723	0.000545462	0.0668426	down	yes
MSTRG.5184	FAM216B	ENSSSCT00000064788;ENSSSCT00000010335	NA	NA	NA	NA	family with sequence similarity 216 member B [Source:NCBI gene;Acc:100157364]	protein_coding	0.0001	0.0353104	0.0001	0.0191369	0.0001	0.0001	1.88711	0.0001	0.0724427	2.77825	0.0115549	-6.43535	0.000549318	0.0670393	down	yes
ENSSSCG00000014196	TMEM232	ENSSSCT00000015511	NA	NA	NA	NA	transmembrane protein 232 [Source:NCBI gene;Acc:100515882]	protein_coding	0.09116	0.085465	0.091456	0.077266	0.051958	0.080074	0.634072	0.177161	0.205945	0.691164	0.222155	-2.17036	0.000555912	0.0672925	down	yes
MSTRG.23547	LRRC71	ENSSSCT00000007079	GO:0005515(protein binding)	NA	NA	NA	leucine rich repeat containing 71 [Source:NCBI gene;Acc:100158094]	protein_coding	0.19595	0.425859	0.576606	0.40699	0.299936	0.31276	3.59343	0.279259	0.416982	8.70747	0.143152	-2.80438	0.000560981	0.0676312	down	yes
MSTRG.5798	KIF19	ENSSSCT00000023323	GO:0000166(nucleotide binding);GO:0003774(motor activity);GO:0003777(microtubule motor activity);GO:0005524(ATP binding);GO:0005871(kinesin complex);GO:0005874(microtubule);GO:0005929(cilium);GO:0005930(axoneme);GO:0007018(microtubule-based movement);GO:0008017(microtubule binding);GO:0008574(ATP-dependent microtubule motor activity, plus-end-directed);GO:0016887(ATPase activity);GO:0060404(axone…	NA	K10401	NA	kinesin family member 19 [Source:NCBI gene;Acc:100623453]	protein_coding	0.012168	0.0001	0.155233	0.066489	0.0001	0.044529	2.7166	0.025898	0.082522	4.33491	0.0324924	-4.94376	0.000583403	0.0697693	down	yes
MSTRG.20705	ENSSSCG00000007848;ENSSSCG00000035146	ENSSSCT00000008598;ENSSSCT00000063194;ENSSSCT00000060845;ENSSSCT00000043046;ENSSSCT00000059665	GO:0000166(nucleotide binding);GO:0005319(lipid transporter activity);GO:0005524(ATP binding);GO:0006869(lipid transport);GO:0016020(membrane);GO:0016021(integral component of membrane);GO:0016887(ATPase activity);GO:0042626(ATPase activity, coupled to transmembrane movement of substances);GO:0043231(intracellular membrane-bounded organelle);GO:0055085(transmembrane transport);GO:0004197(cysteine…	NA	NA	NA		protein_coding	0.0490024	0.0441997	0.0734963	0.0501996	0.0224889	0.0192314	1.66618	0.0301244	0.0304275	0.653122	0.0997823	-3.32507	0.000586555	0.0698657	down	yes
MSTRG.12912	TFCP2L1	ENSSSCT00000017132;ENSSSCT00000033811	GO:0000122(negative regulation of transcription by RNA polymerase II);GO:0000902(cell morphogenesis);GO:0000977(RNA polymerase II regulatory region sequence-specific DNA binding);GO:0001650(fibrillar center);GO:0002070(epithelial cell maturation);GO:0003700(DNA-binding transcription factor activity);GO:0005634(nucleus);GO:0005737(cytoplasm);GO:0005739(mitochondrion);GO:0006357(regulation of trans…	NA	K09275	NA	transcription factor CP2 like 1 [Source:NCBI gene;Acc:100519339]	protein_coding	0.0829163	0.223926	0.17383	0.284999	0.167283	0.22162	2.58089	0.174333	0.255207	2.72487	0.156617	-2.67469	0.000593732	0.0704388	down	yes
MSTRG.35504	APOBEC4	ENSSSCT00000016951	NA	NA	K18773	EC:3.5.4.-	apolipoprotein B mRNA editing enzyme catalytic polypeptide like 4 [Source:NCBI gene;Acc:100515680]	protein_coding	0.0001	0.059879	0.13728	0.08359	0.041535	0.078732	2.94891	0.005394	0.220978	1.90774	0.0624562	-4.00101	0.000613626	0.0719392	down	yes
MSTRG.7172	TEKT3	ENSSSCT00000043117;ENSSSCT00000019623	GO:0005737(cytoplasm);GO:0030317(flagellated sperm motility);GO:0036126(sperm flagellum);GO:0060271(cilium assembly);GO:0060294(cilium movement involved in cell motility);GO:0060378(regulation of brood size);GO:0060378(regulation of brood size)	NA	K18630	NA	tektin 3 [Source:NCBI gene;Acc:100522896]	protein_coding	0.0196342	0.0001	0.0983984	0.0001	0.0001	0.0498275	0.791213	0.0426501	0.183464	1.23752	0.0513446	-4.28364	0.00061851	0.0722274	down	yes
MSTRG.13928	ENSSSCG00000016166	ENSSSCT00000017601	GO:0035082(axoneme assembly);GO:1990716(axonemal central apparatus)	NA	NA	NA	sperm associated antigen 16 [Source:NCBI gene;Acc:102162936]	protein_coding	0.509912	0.375095	0.197647	0.226529	0.298055	0.49389	3.93258	0.241199	0.548146	2.84811	0.199312	-2.3269	0.000627271	0.0726805	down	yes
ENSSSCG00000024420	GMNC	ENSSSCT00000031033	GO:0003682(chromatin binding);GO:0005634(nucleus);GO:0006260(DNA replication);GO:0006270(DNA replication initiation);GO:0008283(cell population proliferation);GO:0060271(cilium assembly)	NA	NA	NA	geminin coiled-coil domain containing [Source:NCBI gene;Acc:100521153]	protein_coding	0.0001	0.010398	0.046037	0.0001	0.009108	0.0001	0.544848	0.019621	0.023803	2.18562	0.0236998	-5.39898	0.000630804	0.0728066	down	yes
MSTRG.28043	TP73	ENSSSCT00000028860	GO:0000978(RNA polymerase II proximal promoter sequence-specific DNA binding);GO:0000981(DNA-binding transcription factor activity, RNA polymerase II-specific);GO:0001228(DNA-binding transcription activator activity, RNA polymerase II-specific);GO:0002039(p53 binding);GO:0003677(DNA binding);GO:0003700(DNA-binding transcription factor activity);GO:0005515(protein binding);GO:0005634(nucleus);GO:0…	04115(p53 signaling pathway);04390(Hippo signaling pathway);04722(Neurotrophin signaling pathway);05162(Measles)	K10148	NA	tumor protein p73 [Source:NCBI gene;Acc:102165390]	protein_coding	0.0554457	0.0775907	0.108126	0.0408097	0.0237827	0.0143282	0.964417	0.0364928	0.0190868	3.3893	0.0691187	-3.85478	0.000636792	0.072873	down	yes
MSTRG.23501	CFAP45	ENSSSCT00000049942;ENSSSCT00000007007	GO:0005654(nucleoplasm);GO:0005654(nucleoplasm)	NA	NA	NA	cilia and flagella associated protein 45 [Source:NCBI gene;Acc:100515727]	protein_coding	0.110787	0.016273	0.042029	0.0576042	0.006841	0.027203	0.841895	0.021792	0.048474	2.22155	0.0738818	-3.75864	0.000638215	0.072873	down	yes
MSTRG.9388	IQCG	ENSSSCT00000012968	GO:0002177(manchette);GO:0005515(protein binding);GO:0005516(calmodulin binding);GO:0005737(cytoplasm);GO:0007286(spermatid development);GO:0007288(sperm axoneme assembly);GO:0030544(Hsp70 protein binding);GO:0031514(motile cilium);GO:0036126(sperm flagellum);GO:0044782(cilium organization)	NA	NA	NA	IQ motif containing G [Source:NCBI gene;Acc:100514601]	protein_coding	0.069709	0.016002	0.062883	0.005595	0.019641	0.028842	0.593135	0.063141	0.160623	0.860176	0.101898	-3.2948	0.000638722	0.072873	down	yes
MSTRG.21377	VWA3B	ENSSSCT00000059322;ENSSSCT00000041868;ENSSSCT00000042634;ENSSSCT00000048604	NA	NA	NA	NA	von Willebrand factor A domain containing 3B [Source:NCBI gene;Acc:100623963]	protein_coding	0.0384024	0.119406	0.124711	0.0126995	0.00838361	0.0392212	1.6049	0.0184716	0.0747513	2.5839	0.0702581	-3.83119	0.000645974	0.0734192	down	yes
MSTRG.8375	OXTR;ENSSSCG00000033575	ENSSSCT00000051112;ENSSSCT00000037692;ENSSSCT00000046849;ENSSSCT00000025394	GO:0004930(G protein-coupled receptor activity);GO:0004990(oxytocin receptor activity);GO:0005000(vasopressin receptor activity);GO:0005886(plasma membrane);GO:0007165(signal transduction);GO:0007186(G protein-coupled receptor signaling pathway);GO:0016020(membrane);GO:0016021(integral component of membrane);GO:0045777(positive regulation of blood pressure);GO:0120162(positive regulation of cold-…	04020(Calcium signaling pathway);04024(cAMP signaling pathway);04080(Neuroactive ligand-receptor interaction);04921(Oxytocin signaling pathway);04921(Oxytocin signaling pathway)	K04229	NA	oxytocin receptor [Source:NCBI gene;Acc:397092]	protein_coding	3.22641	0.53967	1.66344	3.15683	6.29288	0.846214	0.988063	1.23918	0.249195	0.708417	3.69114	1.88407	0.000649112	0.0734953	up	yes
MSTRG.21410	ENSSSCG00000036224	ENSSSCT00000008984;ENSSSCT00000055786;ENSSSCT00000063079;ENSSSCT00000049445;ENSSSCT00000037353;ENSSSCT00000045909;ENSSSCT00000041860;ENSSSCT00000061296;ENSSSCT00000063999;ENSSSCT00000047686	GO:0003823(antigen binding);GO:0006910(phagocytosis, recognition);GO:0006911(phagocytosis, engulfment);GO:0006958(complement activation, classical pathway);GO:0009897(external side of plasma membrane);GO:0034987(immunoglobulin receptor binding);GO:0042571(immunoglobulin complex, circulating);GO:0042742(defense response to bacterium);GO:0045087(innate immune response);GO:0050853(B cell receptor si…	NA	NA	NA		protein_coding	0.108449	0.175263	0.135169	0.69621	0.153299	0.459728	4.12439	0.487661	0.354908	1.1734	0.192178	-2.37949	0.000672807	0.075319	down	yes
MSTRG.7018	SLC16A11	ENSSSCT00000019508;ENSSSCT00000027087	GO:0005789(endoplasmic reticulum membrane);GO:0005886(plasma membrane);GO:0005887(integral component of plasma membrane);GO:0006629(lipid metabolic process);GO:0008028(monocarboxylic acid transmembrane transporter activity);GO:0015718(monocarboxylic acid transport);GO:0016020(membrane);GO:0016021(integral component of membrane);GO:0050833(pyruvate transmembrane transporter activity);GO:0055085(tr…	NA	K08188	NA	solute carrier family 16 member 11 [Source:NCBI gene;Acc:100516827]	protein_coding	0.0001	0.0001	0.0275834	0.0201947	0.0001	0.00893764	0.362193	0.0001	0.0397346	1.73464	0.0224077	-5.47986	0.000682916	0.0761643	down	yes
MSTRG.16004	NEURL2	ENSSSCT00000008133	GO:0016567(protein ubiquitination);GO:0035556(intracellular signal transduction);GO:0061630(ubiquitin protein ligase activity)	NA	K16782	NA	neuralized E3 ubiquitin protein ligase 2 [Source:NCBI gene;Acc:100157993]	protein_coding	0.372461	0.210736	0.228308	0.243178	0.255246	0.574503	4.78776	0.431115	0.455124	0.325601	0.199256	-2.32731	0.000690287	0.0766352	down	yes
MSTRG.18752	GADD45B	ENSSSCT00000028794;ENSSSCT00000064965	GO:0000185(activation of MAPKKK activity);GO:0000186(activation of MAPKK activity);GO:0005634(nucleus);GO:0005737(cytoplasm);GO:0006469(negative regulation of protein kinase activity);GO:0043065(positive regulation of apoptotic process);GO:0046330(positive regulation of JNK cascade);GO:0051726(regulation of cell cycle);GO:1900745(positive regulation of p38MAPK cascade);GO:1900745(positive regulat…	04010(MAPK signaling pathway);04068(FoxO signaling pathway);04110(Cell cycle);04115(p53 signaling pathway);04210(Apoptosis);04218(Cellular senescence);05169(Epstein-Barr virus infection);05200(Pathways in cancer);05202(Transcriptional misregulation in cancer);05210(Colorectal cancer);05212(Pancreatic cancer);05213(Endometrial cancer);05214(Glioma);05216(Thyroid cancer);05217(Basal cell carcinoma)…	K04402	NA	growth arrest and DNA damage inducible beta [Source:NCBI gene;Acc:100621090]	protein_coding	5.24941	1.70369	0.98614	2.97099	4.30464	0.757172	1.55691	1.18925	0.699358	0.590561	3.17422	1.6664	0.000705712	0.0778217	up	yes
ENSSSCG00000038839	TTC36	ENSSSCT00000058481	GO:0005515(protein binding)	NA	NA	NA	tetratricopeptide repeat domain 36 [Source:NCBI gene;Acc:100622487]	protein_coding	0.114633	0.073982	0.0001	0.052094	0.194855	0.376383	0.377824	0.749228	0.96508	0.276759	0.158696	-2.65566	0.00070823	0.0778217	down	yes
MSTRG.3202	MORN5	ENSSSCT00000044809;ENSSSCT00000006080	NA	NA	NA	NA	MORN repeat containing 5 [Source:NCBI gene;Acc:100514270]	protein_coding	0.0913799	0.0745161	0.103539	0.127867	0.124765	0.07006	1.94996	0.10416	0.0821558	1.41441	0.144188	-2.79398	0.00072354	0.0789215	down	yes
MSTRG.2896	ENSSSCG00000025655	ENSSSCT00000027712	NA	NA	NA	NA		protein_coding	0.127498	0.044851	0.135975	0.134761	0.061144	0.060591	1.5838	0.082174	0.070524	2.58819	0.114982	-3.12052	0.000729789	0.0793126	down	yes
MSTRG.29652	TSPAN1	ENSSSCT00000062762;ENSSSCT00000059937;ENSSSCT00000061439;ENSSSCT00000004323	GO:0005654(nucleoplasm);GO:0005737(cytoplasm);GO:0005886(plasma membrane);GO:0005887(integral component of plasma membrane);GO:0007166(cell surface receptor signaling pathway);GO:0008283(cell population proliferation);GO:0016020(membrane);GO:0016021(integral component of membrane);GO:0016477(cell migration);GO:0030054(cell junction);GO:0031982(vesicle);GO:0043231(intracellular membrane-bounded or…	NA	K17348	NA	tetraspanin 1 [Source:NCBI gene;Acc:100511571]	protein_coding	0.0001	0.0001	0.206597	0.0901295	0.0001	0.0001	9.45763	0.0718451	0.114685	16.4402	0.0113871	-6.45645	0.000739512	0.0800771	down	yes
MSTRG.22479	MAPK15	ENSSSCT00000053791	GO:0000165(MAPK cascade);GO:0000166(nucleotide binding);GO:0003400(regulation of COPII vesicle coating);GO:0003682(chromatin binding);GO:0004672(protein kinase activity);GO:0004674(protein serine/threonine kinase activity);GO:0004707(MAP kinase activity);GO:0005524(ATP binding);GO:0005634(nucleus);GO:0005737(cytoplasm);GO:0005776(autophagosome);GO:0005794(Golgi apparatus);GO:0005814(centriole);GO…	04657(IL-17 signaling pathway)	K19603	EC:2.7.11.24	mitogen-activated protein kinase 15 [Source:NCBI gene;Acc:110260411]	protein_coding	0.216612	0.255582	0.543848	0.150159	0.130082	0.107385	4.4029	0.017729	0.295617	12.6389	0.0742324	-3.75181	0.000750733	0.0809976	down	yes
ENSSSCG00000022417	HNF1B	ENSSSCT00000023424	GO:0000122(negative regulation of transcription by RNA polymerase II);GO:0000981(DNA-binding transcription factor activity, RNA polymerase II-specific);GO:0001714(endodermal cell fate specification);GO:0001822(kidney development);GO:0001826(inner cell mass cell differentiation);GO:0001889(liver development);GO:0003677(DNA binding);GO:0003700(DNA-binding transcription factor activity);GO:0005634(n…	04950(Maturity onset diabetes of the young)	K08034	NA	HNF1 homeobox B [Source:NCBI gene;Acc:397002]	protein_coding	0.027422	0.178796	0.105358	0.029959	0.134637	0.16909	1.05612	0.206925	0.055105	2.4793	0.120047	-3.05833	0.000755306	0.0811967	down	yes
ENSSSCG00000032887	EFCAB1	ENSSSCT00000044325	GO:0005509(calcium ion binding)	NA	NA	NA	EF-hand calcium binding domain 1 [Source:NCBI gene;Acc:100156382]	protein_coding	0.024659	0.067432	0.01384	0.025847	0.019334	0.058922	0.294351	0.041651	0.066664	0.608086	0.141269	-2.82348	0.000784835	0.0834672	down	yes
MSTRG.17260	SHANK2	ENSSSCT00000043833;ENSSSCT00000037813;ENSSSCT00000026062;ENSSSCT00000051901;ENSSSCT00000065006	GO:0001750(photoreceptor outer segment);GO:0001917(photoreceptor inner segment);GO:0005515(protein binding);GO:0005883(neurofilament);GO:0005886(plasma membrane);GO:0007416(synapse assembly);GO:0007612(learning);GO:0007613(memory);GO:0008328(ionotropic glutamate receptor complex);GO:0030534(adult behavior);GO:0035176(social behavior);GO:0035255(ionotropic glutamate receptor binding);GO:0035640(ex…	04724(Glutamatergic synapse);04724(Glutamatergic synapse)	K15009	NA	SH3 and multiple ankyrin repeat domains 2 [Source:NCBI gene;Acc:102160500]	protein_coding	0.621234	0.400741	0.240152	0.231227	0.561387	1.39029	1.55212	0.850857	0.530369	2.12073	0.318843	-1.64908	0.000853889	0.0901671	down	yes
MSTRG.31821	ZC2HC1C	ENSSSCT00000048700;ENSSSCT00000002647	NA	NA	NA	NA	zinc finger C2HC-type containing 1C [Source:NCBI gene;Acc:100153971]	protein_coding	0.136252	0.0525703	0.166007	0.0346176	0.0553507	0.200828	1.11668	0.125652	0.0931083	1.34166	0.154555	-2.69381	0.000876887	0.0922683	down	yes
ENSSSCG00000001978	GZMB	ENSSSCT00000047682;ENSSSCT00000002212	GO:0004252(serine-type endopeptidase activity);GO:0006508(proteolysis);GO:0008233(peptidase activity);GO:0008236(serine-type peptidase activity);GO:0016787(hydrolase activity);GO:0042267(natural killer cell mediated cytotoxicity);GO:0042267(natural killer cell mediated cytotoxicity)	04210(Apoptosis);04650(Natural killer cell mediated cytotoxicity);04940(Type I diabetes mellitus);05202(Transcriptional misregulation in cancer);05320(Autoimmune thyroid disease);05330(Allograft rejection);05332(Graft-versus-host disease);05332(Graft-versus-host disease)	K01353	EC:3.4.21.79	granzyme B (granzyme 2, cytotoxic T-lymphocyte-associated serine esterase 1) [Source:NCBI gene;Acc:100233184]	protein_coding	0.0148673	0.0227006	0.0320365	0.00787585	0.0568652	0.0530814	0.328068	0.0422698	0.0332122	0.523939	0.137007	-2.86767	0.000893032	0.0936363	down	yes
MSTRG.27588	ENSSSCG00000026689	ENSSSCT00000025517;ENSSSCT00000029139	GO:0003341(cilium movement);GO:0005930(axoneme);GO:0036158(outer dynein arm assembly);GO:0036158(outer dynein arm assembly)	NA	NA	NA	coiled-coil domain containing 114 [Source:NCBI gene;Acc:100622853]	protein_coding	0.954964	1.0196	1.33739	0.970805	0.824653	1.06649	4.81826	0.872516	2.31314	11.2713	0.251082	-1.99377	0.000909424	0.0950205	down	yes
MSTRG.18490	AP1M2	ENSSSCT00000031515	GO:0006886(intracellular protein transport);GO:0015031(protein transport);GO:0016020(membrane);GO:0016192(vesicle-mediated transport);GO:0030131(clathrin adaptor complex);GO:0043231(intracellular membrane-bounded organelle)	04142(Lysosome);05170(Human immunodeficiency virus 1 infection)	K12393	NA	adaptor related protein complex 1 subunit mu 2 [Source:NCBI gene;Acc:102168166]	protein_coding	0.02776	0.032415	0.144315	0.221678	0.187218	0.199593	1.30115	0.091752	0.310175	2.20456	0.149343	-2.7433	0.000927349	0.0963855	down	yes
MSTRG.4994	NEK5	ENSSSCT00000010277	GO:0004672(protein kinase activity);GO:0005524(ATP binding);GO:0006468(protein phosphorylation)	NA	K08857	EC:2.7.11.1	NIMA related kinase 5 [Source:NCBI gene;Acc:100156672]	protein_coding	0.338299	0.28353	0.3036	0.33234	0.322475	0.163415	2.68419	0.236523	0.313165	6.49849	0.159689	-2.64666	0.000928963	0.0963855	down	yes
MSTRG.10804	CFAP73	ENSSSCT00000010823	NA	NA	NA	NA	cilia and flagella associated protein 73 [Source:NCBI gene;Acc:100523699]	protein_coding	0.251132	0.078506	0.033389	0.128016	0.206913	0.311764	1.47702	0.227183	0.191191	2.41647	0.150954	-2.72782	0.000948602	0.0977421	down	yes
MSTRG.11819	FRMPD2	ENSSSCT00000011361;ENSSSCT00000037981	GO:0005515(protein binding);GO:0005545(1-phosphatidylinositol binding);GO:0005856(cytoskeleton);GO:0005923(bicellular tight junction);GO:0016323(basolateral plasma membrane);GO:0070830(bicellular tight junction assembly);GO:0070830(bicellular tight junction assembly)	NA	NA	NA	FERM and PDZ domain containing 2 [Source:NCBI gene;Acc:100524830]	protein_coding	0.0001	0.0232449	0.0323847	0.0001	0.0001	0.0001	1.71392	0.00186871	0.00250673	3.60043	0.0105154	-6.57135	0.000958429	0.0980759	down	yes
MSTRG.2607	ENSSSCG00000005216	ENSSSCT00000005749	GO:0005179(hormone activity);GO:0005576(extracellular region);GO:0010469(regulation of signaling receptor activity)	04080(Neuroactive ligand-receptor interaction);04926(Relaxin signaling pathway)	K21998	NA	relaxin 2 [Source:NCBI gene;Acc:396891]	protein_coding	26.0016	0.464705	1.63263	7.72013	1.51941	2.8475	2031.73	2.32854	0.430588	0.830573	0.0183196	-5.77046	0.00100816	0.102461	down	yes
MSTRG.10686	LRRC43	ENSSSCT00000010738	NA	NA	NA	NA	leucine rich repeat containing 43 [Source:NCBI gene;Acc:100739692]	protein_coding	0.141244	0.113897	0.33133	0.137316	0.108223	0.07544	1.66861	0.144285	0.218595	3.64676	0.144604	-2.78982	0.00101636	0.102564	down	yes
MSTRG.25369	LMNTD1	ENSSSCT00000040126;ENSSSCT00000045123;ENSSSCT00000039799;ENSSSCT00000054828;ENSSSCT00000061410;ENSSSCT00000056359;ENSSSCT00000032039;ENSSSCT00000059950	GO:0005198(structural molecule activity);GO:0005882(intermediate filament);GO:0005882(intermediate filament)	NA	NA	NA	lamin tail domain containing 1 [Source:NCBI gene;Acc:100627442]	protein_coding	0.082451	0.0877674	0.128946	0.145318	0.0689144	0.0972389	0.204075	0.116416	1.97267	0.293224	0.191307	-2.38604	0.00104104	0.104378	down	yes
MSTRG.13619	CERKL	ENSSSCT00000054087;ENSSSCT00000017433	GO:0001750(photoreceptor outer segment);GO:0001917(photoreceptor inner segment);GO:0003951(NAD+ kinase activity);GO:0005634(nucleus);GO:0005737(cytoplasm);GO:0005829(cytosol);GO:0016301(kinase activity);GO:0016310(phosphorylation);GO:0030148(sphingolipid biosynthetic process);GO:0046625(sphingolipid binding);GO:0048471(perinuclear region of cytoplasm);GO:0048471(perinuclear region of cytoplasm)	NA	K19602	NA	ceramide kinase like [Source:NCBI gene;Acc:100521824]	protein_coding	0.0475519	0.0122035	0.0224569	0.0370098	0.0604178	0.0476048	0.662437	0.014937	0.0510198	0.706054	0.12121	-3.04442	0.00106317	0.10553	down	yes
MSTRG.29390	C1orf87	ENSSSCT00000004232;ENSSSCT00000044207	NA	NA	NA	NA	chromosome 6 C1orf87 homolog [Source:NCBI gene;Acc:100523849]	protein_coding	0.00752396	0.0001	0.130787	0.0001	0.0001	0.0001	3.39018	0.0238842	0.110394	5.58343	0.0152186	-6.03802	0.00107811	0.10574	down	yes
MSTRG.10104	MX1	ENSSSCT00000034038	GO:0000166(nucleotide binding);GO:0000266(mitochondrial fission);GO:0003374(dynamin family protein polymerization involved in mitochondrial fission);GO:0003924(GTPase activity);GO:0005525(GTP binding);GO:0005634(nucleus);GO:0005737(cytoplasm);GO:0005829(cytosol);GO:0008017(microtubule binding);GO:0009615(response to virus);GO:0016020(membrane);GO:0016197(endosomal transport);GO:0031965(nuclear me…	05160(Hepatitis C);05162(Measles);05164(Influenza A);05165(Human papillomavirus infection)	K14754	NA	MX dynamin like GTPase 1 [Source:NCBI gene;Acc:397128]	protein_coding	6.76211	5.28351	6.41891	85.6276	5.2274	2.46168	5.47071	4.31275	3.24591	6.98931	4.86289	2.28182	0.00108659	0.10574	up	yes
MSTRG.35024	DNAH11	ENSSSCT00000016754	GO:0003279(cardiac septum development);GO:0003341(cilium movement);GO:0003351(epithelial cilium movement);GO:0003356(regulation of cilium beat frequency);GO:0003777(microtubule motor activity);GO:0005524(ATP binding);GO:0005930(axoneme);GO:0007018(microtubule-based movement);GO:0007368(determination of left/right symmetry);GO:0007507(heart development);GO:0007611(learning or memory);GO:0008569(AT…	05016(Huntington disease)	K10408	NA	dynein axonemal heavy chain 11 [Source:NCBI gene;Acc:100620543]	protein_coding	0.306474	0.455954	0.648656	0.436869	0.709951	0.278562	4.96015	0.451401	0.504396	6.55141	0.200684	-2.317	0.00109205	0.105925	down	yes
MSTRG.7678	HHATL	ENSSSCT00000063444;ENSSSCT00000012357	GO:0005783(endoplasmic reticulum);GO:0016020(membrane);GO:0016021(integral component of membrane);GO:0048471(perinuclear region of cytoplasm);GO:0060262(negative regulation of N-terminal protein palmitoylation);GO:0060262(negative regulation of N-terminal protein palmitoylation)	NA	NA	NA	hedgehog acyltransferase like [Source:NCBI gene;Acc:100523865]	protein_coding	0.0331665	0.0651729	0.103223	0.0550392	0.0329305	0.116225	0.224282	0.0660486	0.183549	0.876285	0.197445	-2.34047	0.00110061	0.106064	down	yes
MSTRG.7748	ALS2CL	ENSSSCT00000028505;ENSSSCT00000030929;ENSSSCT00000029244	GO:0007032(endosome organization);GO:0042802(identical protein binding);GO:0042802(identical protein binding)	NA	NA	NA	ALS2 C-terminal like [Source:NCBI gene;Acc:102164483]	protein_coding	0.48263	0.9984	1.87275	2.58955	1.41359	1.77334	11.9869	2.4261	1.72634	9.63173	0.267093	-1.90459	0.00112048	0.107632	down	yes
MSTRG.24856	KRT8	ENSSSCT00000038646;ENSSSCT00000048358;ENSSSCT00000000271;ENSSSCT00000042524;ENSSSCT00000054375	GO:0005198(structural molecule activity);GO:0005737(cytoplasm);GO:0005882(intermediate filament);GO:0005911(cell-cell junction);GO:0016327(apicolateral plasma membrane);GO:0030018(Z disc);GO:0033209(tumor necrosis factor-mediated signaling pathway);GO:0042383(sarcolemma);GO:0045095(keratin filament);GO:0045111(intermediate filament cytoskeleton);GO:0051707(response to other organism);GO:0060706(c…	NA	K07605	NA	keratin 8 [Source:NCBI gene;Acc:100152077]	protein_coding	1.21901	2.1487	1.13561	0.89343	1.40029	2.36546	10.3082	0.300324	1.02666	27.0123	0.165729	-2.5931	0.00119193	0.114126	down	yes
MSTRG.29983	STMND1	ENSSSCT00000064319;ENSSSCT00000001162	GO:0005737(cytoplasm);GO:0007019(microtubule depolymerization);GO:0015631(tubulin binding);GO:0031110(regulation of microtubule polymerization or depolymerization);GO:0031175(neuron projection development);GO:0043005(neuron projection);GO:0051493(regulation of cytoskeleton organization);GO:0051493(regulation of cytoskeleton organization)	NA	NA	NA	stathmin domain containing 1 [Source:NCBI gene;Acc:100524942]	protein_coding	0.00884698	0.0001	0.048108	0.0001	0.0001	0.0001	1.15557	0.0001	0.0525148	3.87166	0.0112708	-6.47127	0.00120478	0.114729	down	yes
ENSSSCG00000034919	GDA	ENSSSCT00000062433	GO:0006147(guanine catabolic process);GO:0008270(zinc ion binding);GO:0008892(guanine deaminase activity);GO:0016787(hydrolase activity);GO:0016810(hydrolase activity, acting on carbon-nitrogen (but not peptide) bonds)	00230(Purine metabolism)	K01487	EC:3.5.4.3	guanine deaminase [Source:NCBI gene;Acc:100621043]	protein_coding	0.045736	0.031348	0.08641	0.015036	0.134576	0.090291	1.61786	0.053878	0.102603	0.380927	0.139433	-2.84235	0.00120593	0.114729	down	yes
MSTRG.8931	ENSSSCG00000033350	ENSSSCT00000048424	NA	NA	K01050	EC:3.1.1.8	butyrylcholinesterase [Source:NCBI gene;Acc:100624138]	protein_coding	0.460838	0.858497	1.03993	0.963239	0.753654	0.956413	4.25509	1.42123	0.978362	4.84656	0.327201	-1.61175	0.00121748	0.114774	down	yes
MSTRG.5388	ENSSSCG00000027851;ENSSSCG00000009496	ENSSSCT00000010413;ENSSSCT00000010411	GO:0005524(ATP binding);GO:0005886(plasma membrane);GO:0016020(membrane);GO:0016021(integral component of membrane);GO:0042626(ATPase activity, coupled to transmembrane movement of substances);GO:0055085(transmembrane transport);GO:0016887(ATPase activity);GO:0055085(transmembrane transport)	NA	NA	NA		protein_coding	0.0661929	0.115807	0.181389	0.0954938	0.00975843	0.0660368	2.13106	0.0926014	0.0001	5.76445	0.0581856	-4.10319	0.00128495	0.1192	down	yes
MSTRG.23361	CCDC181	ENSSSCT00000042578;ENSSSCT00000028434;ENSSSCT00000054596;ENSSSCT00000048909	GO:0002177(manchette);GO:0008017(microtubule binding);GO:0036126(sperm flagellum);GO:0036126(sperm flagellum)	NA	NA	NA	coiled-coil domain containing 181 [Source:NCBI gene;Acc:100513278]	protein_coding	0.199052	0.312489	0.307999	0.248027	0.741123	0.762313	1.76892	0.543027	0.768973	3.13281	0.259272	-1.94746	0.00131669	0.121467	down	yes
MSTRG.8893	RARRES1	ENSSSCT00000023744	NA	NA	NA	NA	retinoic acid receptor responder 1 [Source:NCBI gene;Acc:100620650]	protein_coding	38.7271	71.3765	105.848	60.2856	46.0006	59.4273	34.533	445.984	587.407	131.541	0.255969	-1.96596	0.00132932	0.121799	down	yes
MSTRG.4489	SPAG6	ENSSSCT00000012127	GO:0005515(protein binding);GO:0015630(microtubule cytoskeleton)	NA	NA	NA	sperm associated antigen 6 [Source:NCBI gene;Acc:100286811]	protein_coding	0.094522	0.0001	0.170994	0.047685	0.170315	0.0001	3.53491	0.100439	0.170899	5.47033	0.0521325	-4.26167	0.00134128	0.122518	down	yes
MSTRG.26413	ATP2C2	ENSSSCT00000002962	GO:0000139(Golgi membrane);GO:0000166(nucleotide binding);GO:0005388(calcium-transporting ATPase activity);GO:0005524(ATP binding);GO:0006811(ion transport);GO:0006816(calcium ion transport);GO:0006874(cellular calcium ion homeostasis);GO:0008553(proton-exporting ATPase activity, phosphorylative mechanism);GO:0009898(cytoplasmic side of plasma membrane);GO:0015410(manganese-transporting ATPase ac…	NA	K01537	EC:7.2.2.10	ATPase secretory pathway Ca2+ transporting 2 [Source:NCBI gene;Acc:100514770]	protein_coding	0.234408	0.173892	0.388485	0.526013	0.509925	0.278732	2.97825	0.375002	0.539142	4.80994	0.204065	-2.2929	0.00140168	0.127254	down	yes
MSTRG.26106	LUM	ENSSSCT00000001000	GO:0005515(protein binding);GO:0005518(collagen binding);GO:0005583(fibrillar collagen trimer);GO:0007601(visual perception);GO:0030021(extracellular matrix structural constituent conferring compression resistance);GO:0030199(collagen fibril organization);GO:0031012(extracellular matrix);GO:0032914(positive regulation of transforming growth factor beta1 production);GO:0045944(positive regulation …	05205(Proteoglycans in cancer)	K08122	NA	lumican [Source:NCBI gene;Acc:100152607]	protein_coding	3.36298	6.19205	2.94015	3.13827	2.06944	6.37952	7.67793	3.56453	8.08825	29.0265	0.323419	-1.62853	0.00141993	0.128519	down	yes
MSTRG.8997	TMEM212	ENSSSCT00000046395;ENSSSCT00000012862	GO:0016020(membrane);GO:0016021(integral component of membrane);GO:0016021(integral component of membrane)	NA	K22196	NA	transmembrane protein 212 [Source:NCBI gene;Acc:100519624]	protein_coding	0.0001	0.0001	0.0623117	0.0001	0.0001	0.0266211	1.92459	0.0001	0.0385151	1.7008	0.0169922	-5.87899	0.00142493	0.12858	down	yes
MSTRG.13911	ERBB4	ENSSSCT00000051064;ENSSSCT00000027992;ENSSSCT00000017595	GO:0000166(nucleotide binding);GO:0001755(neural crest cell migration);GO:0004672(protein kinase activity);GO:0004713(protein tyrosine kinase activity);GO:0004714(transmembrane receptor protein tyrosine kinase activity);GO:0005154(epidermal growth factor receptor binding);GO:0005524(ATP binding);GO:0005634(nucleus);GO:0005739(mitochondrion);GO:0005887(integral component of plasma membrane);GO:000…	04010(MAPK signaling pathway);04012(ErbB signaling pathway);04020(Calcium signaling pathway);04151(PI3K-Akt signaling pathway);05205(Proteoglycans in cancer);05205(Proteoglycans in cancer)	K05085	EC:2.7.10.1	erb-b2 receptor tyrosine kinase 4 [Source:NCBI gene;Acc:100525789]	protein_coding	0.510252	0.839598	0.330526	0.229191	0.648932	2.21502	1.60395	2.14114	0.241899	2.74737	0.285886	-1.80649	0.00143438	0.129043	down	yes
MSTRG.17402	ENSSSCG00000012984	ENSSSCT00000065065;ENSSSCT00000014194	GO:0004672(protein kinase activity);GO:0005524(ATP binding);GO:0006468(protein phosphorylation);GO:0006468(protein phosphorylation)	NA	K08876	NA	SCY1 like pseudokinase 1 [Source:NCBI gene;Acc:100517698]	protein_coding	121.357	56.3782	205.779	154.135	57.7418	137.75	1113.32	492.174	130.37	205.082	0.286425	-1.80377	0.00146605	0.131494	down	yes
MSTRG.14406	SPEF2	ENSSSCT00000018326	GO:0005515(protein binding)	NA	NA	NA	sperm flagellar 2 [Source:NCBI gene;Acc:733620]	protein_coding	0.712118	0.811415	0.685747	0.658027	0.609077	0.867181	3.57923	0.944443	0.920766	4.03359	0.336038	-1.5733	0.00150667	0.134731	down	yes
MSTRG.21863	EPCAM	ENSSSCT00000061463;ENSSSCT00000009230	GO:0001657(ureteric bud development);GO:0005886(plasma membrane);GO:0005923(bicellular tight junction);GO:0008284(positive regulation of cell population proliferation);GO:0009986(cell surface);GO:0016020(membrane);GO:0016021(integral component of membrane);GO:0016323(basolateral plasma membrane);GO:0016324(apical plasma membrane);GO:0016328(lateral plasma membrane);GO:0023019(signal transduction …	NA	K06737	NA	epithelial cell adhesion molecule [Source:NCBI gene;Acc:403163]	protein_coding	0.109654	0.0740334	0.19922	0.566447	0.15809	0.260874	3.99685	0.119152	0.241897	2.21144	0.162139	-2.6247	0.00155407	0.13814	down	yes
MSTRG.909	ENSSSCG00000033739	ENSSSCT00000045750	GO:0005524(ATP binding);GO:0006139(nucleobase-containing compound metabolic process);GO:0016310(phosphorylation);GO:0019205(nucleobase-containing compound kinase activity)	00230(Purine metabolism);00240(Pyrimidine metabolism)	K18533	2.7.4.6;EC:2.7.4.3	adenylate kinase 9 [Source:NCBI gene;Acc:102166322]	protein_coding	0.0001	0.01343	0.182602	0.036338	0.0001	0.037917	1.88376	0.014237	0.109452	2.90311	0.0469983	-4.41125	0.00156791	0.138549	down	yes
ENSSSCG00000000934	LRRIQ1	ENSSSCT00000047300;ENSSSCT00000001020;ENSSSCT00000039255;ENSSSCT00000037986;ENSSSCT00000064295	GO:0005515(protein binding);GO:0005515(protein binding)	NA	NA	NA	leucine rich repeats and IQ motif containing 1 [Source:NCBI gene;Acc:100628126]	protein_coding	0.257557	0.390891	0.196523	0.216629	0.157263	0.26182	1.60834	0.198447	0.464223	2.70038	0.232909	-2.10216	0.00157263	0.138549	down	yes
ENSSSCG00000010922	ELF3	ENSSSCT00000011953	GO:0000978(RNA polymerase II proximal promoter sequence-specific DNA binding);GO:0000981(DNA-binding transcription factor activity, RNA polymerase II-specific);GO:0001228(DNA-binding transcription activator activity, RNA polymerase II-specific);GO:0001824(blastocyst development);GO:0003677(DNA binding);GO:0003700(DNA-binding transcription factor activity);GO:0003713(transcription coactivator acti…	NA	K09429	NA	E74 like ETS transcription factor 3 [Source:NCBI gene;Acc:100524949]	protein_coding	0.025148	0.026373	0.037121	0.083489	0.052626	0.027718	1.07557	0.0001	0.05798	1.67271	0.0793049	-3.65645	0.00166391	0.143617	down	yes
MSTRG.21478	ENSSSCG00000023812;ENSSSCG00000032775;ENSSSCG00000038684	ENSSSCT00000030192;ENSSSCT00000040501;ENSSSCT00000061111;ENSSSCT00000063885	GO:0003777(microtubule motor activity);GO:0005858(axonemal dynein complex);GO:0007018(microtubule-based movement);GO:0016887(ATPase activity);GO:0060285(cilium-dependent cell motility);GO:0005524(ATP binding);GO:0060285(cilium-dependent cell motility)	NA	NA	NA		protein_coding	0.785984	0.679171	0.662566	0.526659	0.716494	0.761948	4.27973	0.607576	0.63006	5.894	0.276907	-1.85253	0.00167586	0.144196	down	yes
MSTRG.26161	MGAT4C	ENSSSCT00000052040	GO:0016020(membrane);GO:0016021(integral component of membrane)	00510(N-Glycan biosynthesis)	K13748	2.4.1.145;EC:2.4.1.201	MGAT4 family member C [Source:NCBI gene;Acc:414851]	protein_coding	1.89985	0.528175	0.230517	0.29113	1.70273	7.00433	3.11242	3.21731	1.23071	4.88039	0.239258	-2.06336	0.0016803	0.144196	down	yes
MSTRG.907	ENSSSCG00000004410	ENSSSCT00000004873	GO:0005524(ATP binding);GO:0006139(nucleobase-containing compound metabolic process);GO:0016310(phosphorylation);GO:0019205(nucleobase-containing compound kinase activity)	NA	NA	NA		protein_coding	0.0001	0.022154	0.018028	0.051724	0.0001	0.0001	1.83397	0.001091	0.0001	2.09158	0.0234555	-5.41393	0.00174367	0.148777	down	yes
MSTRG.26706	CDH1	ENSSSCT00000061769;ENSSSCT00000041655;ENSSSCT00000053449;ENSSSCT00000029834;ENSSSCT00000058692	GO:0000902(cell morphogenesis);GO:0005509(calcium ion binding);GO:0005737(cytoplasm);GO:0005802(trans-Golgi network);GO:0005886(plasma membrane);GO:0005913(cell-cell adherens junction);GO:0007043(cell-cell junction assembly);GO:0007155(cell adhesion);GO:0007156(homophilic cell adhesion via plasma membrane adhesion molecules);GO:0007416(synapse assembly);GO:0008013(beta-catenin binding);GO:0008092…	04015(Rap1 signaling pathway);04371(Apelin signaling pathway);04390(Hippo signaling pathway);04514(Cell adhesion molecules (CAMs));04520(Adherens junction);05100(Bacterial invasion of epithelial cells);05200(Pathways in cancer);05213(Endometrial cancer);05216(Thyroid cancer);05218(Melanoma);05219(Bladder cancer);05226(Gastric cancer);05226(Gastric cancer)	K05689	NA	cadherin 1 [Source:NCBI gene;Acc:100048953]	protein_coding	0.622636	0.860405	1.2526	1.43133	1.06126	1.37018	7.62025	0.556287	0.911779	11.7657	0.235249	-2.08774	0.00177163	0.150301	down	yes
MSTRG.13138	BRF2	ENSSSCT00000038384	GO:0000126(transcription factor TFIIIB complex);GO:0001032(RNA polymerase III type 3 promoter DNA binding);GO:0006355(regulation of transcription, DNA-templated);GO:0006359(regulation of transcription by RNA polymerase III);GO:0034599(cellular response to oxidative stress);GO:0046872(metal ion binding);GO:0070897(transcription preinitiation complex assembly)	NA	K15197	NA	BRF2, RNA polymerase III transcription initiation factor subunit [Source:NCBI gene;Acc:100524530]	protein_coding	1.26128	7.12832	1.8145	8.59531	8.30726	1.87149	1.68897	1.86036	2.40374	1.80759	2.81418	1.49272	0.00179298	0.15168	up	yes
MSTRG.33861	ENSSSCG00000040340	ENSSSCT00000049051;ENSSSCT00000055928	GO:0004930(G protein-coupled receptor activity);GO:0004984(olfactory receptor activity);GO:0005886(plasma membrane);GO:0007165(signal transduction);GO:0007186(G protein-coupled receptor signaling pathway);GO:0007608(sensory perception of smell);GO:0016020(membrane);GO:0016021(integral component of membrane);GO:0050896(response to stimulus);GO:0050911(detection of chemical stimulus involved in sen…	NA	NA	NA		protein_coding	0.0522074	0.0190047	0.0788887	0.0102075	0.0860564	0.762579	0.0122101	0.12914	1.27469	0.0472025	0.110685	-3.17547	0.00182116	0.153627	down	yes
MSTRG.19023	F2RL1	ENSSSCT00000015392	GO:0000187(activation of MAPK activity);GO:0001965(G-protein alpha-subunit binding);GO:0002286(T cell activation involved in immune response);GO:0002690(positive regulation of leukocyte chemotaxis);GO:0002741(positive regulation of cytokine secretion involved in immune response);GO:0004930(G protein-coupled receptor activity);GO:0005769(early endosome);GO:0005886(plasma membrane);GO:0005887(integ…	04080(Neuroactive ligand-receptor interaction);04750(Inflammatory mediator regulation of TRP channels);05143(African trypanosomiasis)	K04234	NA	F2R like trypsin receptor 1 [Source:NCBI gene;Acc:100519703]	protein_coding	0.609935	1.77407	0.504354	1.83443	1.54285	10.0371	1.85034	4.52687	2.02222	2.43892	0.300143	-1.73628	0.00185052	0.155664	down	yes
MSTRG.8889	GFM1	ENSSSCT00000028063;ENSSSCT00000037979	GO:0000166(nucleotide binding);GO:0003746(translation elongation factor activity);GO:0003924(GTPase activity);GO:0005525(GTP binding);GO:0005622(intracellular);GO:0005739(mitochondrion);GO:0006412(translation);GO:0006414(translational elongation);GO:0070125(mitochondrial translational elongation);GO:0070125(mitochondrial translational elongation)	NA	K02355	NA	G elongation factor mitochondrial 1 [Source:NCBI gene;Acc:100620441]	protein_coding	2.98534	2.76845	4.68725	2.63201	2.79046	2.25228	2.61704	18.6605	15.9708	8.30452	0.331837	-1.59145	0.00186952	0.156124	down	yes
MSTRG.8510	ENSSSCG00000024552	ENSSSCT00000060029;ENSSSCT00000028260;ENSSSCT00000027292	NA	NA	NA	NA	KIAA1257 ortholog [Source:NCBI gene;Acc:100622492]	protein_coding	0.154782	0.254056	0.299906	0.179138	0.117163	0.236105	1.45067	0.204801	0.208195	2.53489	0.216854	-2.20521	0.00191395	0.158756	down	yes
MSTRG.11545	SUPV3L1;HKDC1	ENSSSCT00000011221;ENSSSCT00000058821;ENSSSCT00000011222	GO:0000958(mitochondrial mRNA catabolic process);GO:0000962(positive regulation of mitochondrial RNA catabolic process);GO:0000965(mitochondrial RNA 3'-end processing);GO:0003677(DNA binding);GO:0003678(DNA helicase activity);GO:0003725(double-stranded RNA binding);GO:0004004(ATP-dependent RNA helicase activity);GO:0005634(nucleus);GO:0005739(mitochondrion);GO:0005759(mitochondrial matrix);GO:000…	00010(Glycolysis / Gluconeogenesis);00051(Fructose and mannose metabolism);00052(Galactose metabolism);00500(Starch and sucrose metabolism);00520(Amino sugar and nucleotide sugar metabolism);00524(Neomycin, kanamycin and gentamicin biosynthesis);04066(HIF-1 signaling pathway);04910(Insulin signaling pathway);04930(Type II diabetes mellitus);04973(Carbohydrate digestion and absorption);05230(Centr…	K17675;K00844	EC:3.6.4.13;EC:2.7.1.1	Suv3 like RNA helicase [Source:NCBI gene;Acc:100155960];hexokinase domain containing 1 [Source:NCBI gene;Acc:100153520]	protein_coding	1.11344	0.473993	0.429503	0.590781	0.620918	0.520676	15.664	0.490554	0.625076	1.00128	0.176413	-2.50297	0.00194149	0.160149	down	yes
MSTRG.30736	CLIC5	ENSSSCT00000063969;ENSSSCT00000045881	GO:0005244(voltage-gated ion channel activity);GO:0005254(chloride channel activity);GO:0005515(protein binding);GO:0005737(cytoplasm);GO:0006811(ion transport);GO:0006821(chloride transport);GO:0007605(sensory perception of sound);GO:0015629(actin cytoskeleton);GO:0016020(membrane);GO:0034220(ion transmembrane transport);GO:0034707(chloride channel complex);GO:0034765(regulation of ion transmemb…	NA	K05025	NA	chloride intracellular channel 5 [Source:NCBI gene;Acc:100154589]	protein_coding	3.7813	2.10136	2.15709	4.3327	1.78004	3.07761	71.3365	2.6882	1.69381	3.67248	0.171611	-2.54279	0.00195007	0.160412	down	yes
MSTRG.22560	LRRC6	ENSSSCT00000006535	GO:0003341(cilium movement);GO:0003351(epithelial cilium movement);GO:0005515(protein binding);GO:0005737(cytoplasm);GO:0005929(cilium);GO:0007010(cytoskeleton organization);GO:0008584(male gonad development);GO:0030317(flagellated sperm motility);GO:0031514(motile cilium);GO:0036158(outer dynein arm assembly);GO:0036159(inner dynein arm assembly);GO:0044458(motile cilium assembly);GO:0060271(cil…	NA	K19753	NA	leucine rich repeat containing 6 [Source:NCBI gene;Acc:100152481]	protein_coding	0.060795	0.0001	0.125601	0.034542	0.116853	0.022353	1.46495	0.081764	0.020288	2.86055	0.0759322	-3.71914	0.00195795	0.160617	down	yes
MSTRG.33205	SLC7A11	ENSSSCT00000025645;ENSSSCT00000062233;ENSSSCT00000038168	GO:0006749(glutathione metabolic process);GO:0006865(amino acid transport);GO:0007420(brain development);GO:0008542(visual learning);GO:0009636(response to toxic substance);GO:0009986(cell surface);GO:0014070(response to organic cyclic compound);GO:0015179(L-amino acid transmembrane transporter activity);GO:0016020(membrane);GO:0016021(integral component of membrane);GO:0021591(ventricular system…	04216(Ferroptosis);04216(Ferroptosis)	K13869	NA	solute carrier family 7 member 11 [Source:NCBI gene;Acc:100623148]	protein_coding	0.653688	1.24062	0.418164	0.62059	0.673297	1.33359	1.81319	1.54926	1.0787	3.2618	0.399086	-1.32523	0.00198838	0.162664	down	yes
MSTRG.24857	KRT18	ENSSSCT00000000272	GO:0005198(structural molecule activity);GO:0005737(cytoplasm);GO:0005815(microtubule organizing center);GO:0005829(cytosol);GO:0005882(intermediate filament);GO:0033209(tumor necrosis factor-mediated signaling pathway);GO:0034451(centriolar satellite);GO:0043000(Golgi to plasma membrane CFTR protein transport);GO:0043066(negative regulation of apoptotic process);GO:0045095(keratin filament);GO:0…	04915(Estrogen signaling pathway)	K07604	NA	keratin 18 [Source:NCBI gene;Acc:100126286]	protein_coding	0.062029	0.0001	0.088866	0.021571	0.229179	0.091568	1.89635	0.024216	0.042837	3.33687	0.0745097	-3.74643	0.00201703	0.164557	down	yes
ENSSSCG00000039271	ST8SIA2	ENSSSCT00000059712;ENSSSCT00000039954	GO:0001574(ganglioside biosynthetic process);GO:0003828(alpha-N-acetylneuraminate alpha-2,8-sialyltransferase activity);GO:0005769(early endosome);GO:0005794(Golgi apparatus);GO:0006486(protein glycosylation);GO:0006491(N-glycan processing);GO:0008373(sialyltransferase activity);GO:0009311(oligosaccharide metabolic process);GO:0016020(membrane);GO:0016021(integral component of membrane);GO:001674…	NA	K06612	EC:2.4.99.-	ST8 alpha-N-acetyl-neuraminide alpha-2,8-sialyltransferase 2 [Source:NCBI gene;Acc:100158046]	protein_coding	0.484447	0.471653	0.566983	1.40884	1.01623	0.440619	0.28934	0.320795	0.136305	0.15298	2.9463	1.5589	0.00202735	0.164947	up	yes
MSTRG.35222	ENSSSCG00000022264;CDHR3	ENSSSCT00000025371;ENSSSCT00000016813	GO:0005509(calcium ion binding);GO:0005886(plasma membrane);GO:0005887(integral component of plasma membrane);GO:0007155(cell adhesion);GO:0007156(homophilic cell adhesion via plasma membrane adhesion molecules);GO:0016020(membrane);GO:0016021(integral component of membrane)	NA	K16503	NA	cadherin related family member 3 [Source:NCBI gene;Acc:100517845]	protein_coding	0.117179	0.176769	0.69512	0.491552	0.258098	0.169879	4.57898	0.173254	0.196712	7.08882	0.142429	-2.81169	0.00210229	0.169918	down	yes
MSTRG.9458	SLC15A2;EAF2	ENSSSCT00000054922;ENSSSCT00000052371;ENSSSCT00000022765;ENSSSCT00000012996	GO:0005215(transporter activity);GO:0006857(oligopeptide transport);GO:0016020(membrane);GO:0016021(integral component of membrane);GO:0022857(transmembrane transporter activity);GO:0035672(oligopeptide transmembrane transport);GO:0035673(oligopeptide transmembrane transporter activity);GO:0055085(transmembrane transport);GO:0000977(RNA polymerase II regulatory region sequence-specific DNA bindin…	NA	K14637;K15186	NA	solute carrier family 15 member 2 [Source:NCBI gene;Acc:100048951];ELL associated factor 2 [Source:NCBI gene;Acc:106504176]	protein_coding	0.455694	0.325046	0.259286	0.575603	0.437472	0.443811	4.16154	0.456816	0.489287	2.27184	0.262434	-1.92997	0.0021109	0.169918	down	yes
MSTRG.10086	B3GALT5	ENSSSCT00000053227;ENSSSCT00000065837;ENSSSCT00000065285;ENSSSCT00000061010	GO:0000139(Golgi membrane);GO:0005794(Golgi apparatus);GO:0006486(protein glycosylation);GO:0008378(galactosyltransferase activity);GO:0009617(response to bacterium);GO:0016020(membrane);GO:0016021(integral component of membrane);GO:0016740(transferase activity);GO:0016757(transferase activity, transferring glycosyl groups);GO:0016757(transferase activity, transferring glycosyl groups)	00601(Glycosphingolipid biosynthesis - lacto and neolacto series);00603(Glycosphingolipid biosynthesis - globo and isoglobo series);00603(Glycosphingolipid biosynthesis - globo and isoglobo series)	K03877	EC:2.4.1.-	beta-1,3-galactosyltransferase 5 [Source:NCBI gene;Acc:100516832]	protein_coding	0.14474	0.191857	0.21176	0.47518	0.172388	0.242948	1.8906	0.131832	0.177456	4.09775	0.182847	-2.45129	0.00211128	0.169918	down	yes
MSTRG.12409	ENO4	ENSSSCT00000011664;ENSSSCT00000022490	GO:0000015(phosphopyruvate hydratase complex);GO:0000287(magnesium ion binding);GO:0004634(phosphopyruvate hydratase activity);GO:0006096(glycolytic process);GO:0006096(glycolytic process)	00010(Glycolysis / Gluconeogenesis);03018(RNA degradation);04066(HIF-1 signaling pathway);04066(HIF-1 signaling pathway)	K01689	EC:4.2.1.11	enolase 4 [Source:NCBI gene;Acc:100158218]	protein_coding	0.333338	0.0670058	0.114182	0.0892361	0.0634098	0.0317903	2.96694	0.051418	0.174996	2.41322	0.118327	-3.07915	0.00213138	0.171073	down	yes
MSTRG.17191	EPS8L2	ENSSSCT00000063658;ENSSSCT00000054882;ENSSSCT00000014043	GO:0003779(actin binding);GO:0005089(Rho guanyl-nucleotide exchange factor activity);GO:0005515(protein binding);GO:0005829(cytosol);GO:0005886(plasma membrane);GO:0007266(Rho protein signal transduction);GO:0007605(sensory perception of sound);GO:0030676(Rac guanyl-nucleotide exchange factor activity);GO:0032421(stereocilium bundle);GO:0032426(stereocilium tip);GO:0032587(ruffle membrane);GO:003…	NA	K17277	NA	EPS8 like 2 [Source:NCBI gene;Acc:110259209]	protein_coding	0.063279	0.17863	0.210472	0.314842	0.162744	0.422919	1.11377	0.0552634	0.250325	2.88815	0.196593	-2.34672	0.00215269	0.172319	down	yes
MSTRG.34817	CFAP69	ENSSSCT00000063926;ENSSSCT00000016674;ENSSSCT00000048046	GO:0005737(cytoplasm);GO:0042048(olfactory behavior);GO:0097225(sperm midpiece);GO:0097730(non-motile cilium);GO:1902093(positive regulation of flagellated sperm motility);GO:1905516(positive regulation of fertilization);GO:1990834(response to odorant);GO:1990834(response to odorant)	NA	NA	NA	cilia and flagella associated protein 69 [Source:NCBI gene;Acc:100622715]	protein_coding	0.301747	0.360052	0.378527	0.159935	0.288797	0.306444	3.10628	0.119611	0.411688	3.6026	0.197314	-2.34143	0.00224633	0.178377	down	yes
MSTRG.4502	NEBL	ENSSSCT00000040533;ENSSSCT00000045325;ENSSSCT00000059223;ENSSSCT00000062235;ENSSSCT00000040834;ENSSSCT00000012137;ENSSSCT00000036863	GO:0001725(stress fiber);GO:0003779(actin binding);GO:0005515(protein binding);GO:0005523(tropomyosin binding);GO:0008092(cytoskeletal protein binding);GO:0030018(Z disc);GO:0031005(filamin binding);GO:0046872(metal ion binding);GO:0048747(muscle fiber development);GO:0051015(actin filament binding);GO:0071691(cardiac muscle thin filament assembly);GO:0071691(cardiac muscle thin filament assembly)	NA	NA	NA	nebulette [Source:NCBI gene;Acc:100522395]	protein_coding	1.54758	1.43981	1.61306	1.45264	2.34749	4.88156	3.02323	3.78779	1.97036	3.79404	0.481216	-1.05524	0.00225756	0.178791	down	yes
MSTRG.27707	PRKCG	ENSSSCT00000003617	GO:0000166(nucleotide binding);GO:0004672(protein kinase activity);GO:0004674(protein serine/threonine kinase activity);GO:0004697(protein kinase C activity);GO:0004712(protein serine/threonine/tyrosine kinase activity);GO:0005524(ATP binding);GO:0005634(nucleus);GO:0005737(cytoplasm);GO:0005886(plasma membrane);GO:0005911(cell-cell junction);GO:0006468(protein phosphorylation);GO:0007268(chemica…	01521(EGFR tyrosine kinase inhibitor resistance);04010(MAPK signaling pathway);04012(ErbB signaling pathway);04014(Ras signaling pathway);04015(Rap1 signaling pathway);04020(Calcium signaling pathway);04066(HIF-1 signaling pathway);04070(Phosphatidylinositol signaling system);04071(Sphingolipid signaling pathway);04150(mTOR signaling pathway);04270(Vascular smooth muscle contraction);04310(Wnt si…	K19663	EC:2.7.11.13	protein kinase C gamma [Source:NCBI gene;Acc:100518074]	protein_coding	0.0638322	0.415753	0.550452	0.20975	0.204472	0.221338	3.12393	0.0891155	0.302227	5.62633	0.154253	-2.69663	0.00230819	0.181499	down	yes
MSTRG.6792	ENSSSCG00000017814	ENSSSCT00000058538;ENSSSCT00000019388	GO:0016598(protein arginylation);GO:0016598(protein arginylation)	NA	NA	NA	chromosome 12 C17orf97 homolog [Source:NCBI gene;Acc:100524395]	protein_coding	0.0495955	0.0228564	0.0516003	0.0001	0.0510119	0.0251529	0.517693	0.0355862	0.114389	0.689321	0.126734	-2.98013	0.00231613	0.181499	down	yes
MSTRG.7734	CCR1	ENSSSCT00000012397	GO:0004435(phosphatidylinositol phospholipase C activity);GO:0004930(G protein-coupled receptor activity);GO:0004950(chemokine receptor activity);GO:0005737(cytoplasm);GO:0005886(plasma membrane);GO:0006816(calcium ion transport);GO:0006874(cellular calcium ion homeostasis);GO:0006887(exocytosis);GO:0006935(chemotaxis);GO:0006954(inflammatory response);GO:0006955(immune response);GO:0007165(signa…	04060(Cytokine-cytokine receptor interaction);04062(Chemokine signaling pathway);05163(Human cytomegalovirus infection);05167(Kaposi sarcoma-associated herpesvirus infection)	K04176	NA	C-C motif chemokine receptor 1 [Source:NCBI gene;Acc:414374]	protein_coding	0.955243	0.412803	1.61848	2.77242	3.37014	0.774462	0.755701	0.541611	0.375088	0.450805	3.15049	1.65558	0.00233402	0.182421	up	yes
MSTRG.899	ENSSSCG00000004415	ENSSSCT00000024443;ENSSSCT00000004878	NA	NA	NA	NA	coiled-coil domain containing 162, pseudogene [Source:NCBI gene;Acc:100514885]	protein_coding	0.282726	0.387559	0.40743	0.338157	0.317267	0.374819	2.56986	0.163223	0.432038	3.65917	0.240744	-2.05443	0.00250748	0.193559	down	yes
MSTRG.15182	TPPP	ENSSSCT00000045645;ENSSSCT00000065219	GO:0001578(microtubule bundle formation);GO:0005634(nucleus);GO:0005737(cytoplasm);GO:0005739(mitochondrion);GO:0005829(cytosol);GO:0005874(microtubule);GO:0015631(tubulin binding);GO:0032273(positive regulation of protein polymerization);GO:0046785(microtubule polymerization);GO:0048471(perinuclear region of cytoplasm);GO:0097427(microtubule bundle);GO:0097427(microtubule bundle)	NA	NA	NA	tubulin polymerization promoting protein [Source:NCBI gene;Acc:100144410]	protein_coding	0.225028	0.289669	0.277328	0.195554	0.282698	0.274076	1.05373	0.127095	0.179014	4.942	0.193171	-2.37205	0.00252913	0.194102	down	yes
MSTRG.14077	DAW1	ENSSSCT00000017700	GO:0005515(protein binding)	NA	K19760	NA	dynein assembly factor with WD repeats 1 [Source:NCBI gene;Acc:100515511]	protein_coding	0.0001	0.026317	0.120069	0.031889	0.0001	0.0001	2.39117	0.0001	0.007316	6.70342	0.0196081	-5.67241	0.00254866	0.194102	down	yes
MSTRG.14411	CAPSL	ENSSSCT00000048596;ENSSSCT00000062463	GO:0005509(calcium ion binding);GO:0005509(calcium ion binding)	NA	NA	NA	calcyphosine like [Source:NCBI gene;Acc:100623235]	protein_coding	0.133846	0.111218	0.109622	0.174209	0.0891105	0.0566797	1.34242	0.0904351	0.183595	1.36132	0.203663	-2.29574	0.00259213	0.196408	down	yes
MSTRG.14879	GABRP	ENSSSCT00000026800;ENSSSCT00000043513;ENSSSCT00000057441	GO:0004888(transmembrane signaling receptor activity);GO:0004890(GABA-A receptor activity);GO:0005216(ion channel activity);GO:0005230(extracellular ligand-gated ion channel activity);GO:0005886(plasma membrane);GO:0005887(integral component of plasma membrane);GO:0006811(ion transport);GO:0007165(signal transduction);GO:0007268(chemical synaptic transmission);GO:0016020(membrane);GO:0016021(inte…	04080(Neuroactive ligand-receptor interaction);04723(Retrograde endocannabinoid signaling);04727(GABAergic synapse);05032(Morphine addiction);05033(Nicotine addiction);05033(Nicotine addiction)	K05189	NA	gamma-aminobutyric acid type A receptor pi subunit [Source:NCBI gene;Acc:100525792]	protein_coding	0.0350531	0.038144	0.188663	0.0205741	0.0136302	0.0446072	1.49163	0.0001	0.0183958	2.84166	0.0673426	-3.89234	0.00270643	0.201411	down	yes
MSTRG.31632	GPX2	ENSSSCT00000002537	GO:0004601(peroxidase activity);GO:0004602(glutathione peroxidase activity);GO:0006979(response to oxidative stress);GO:0016491(oxidoreductase activity);GO:0055114(oxidation-reduction process);GO:0098869(cellular oxidant detoxification)	00480(Glutathione metabolism);00590(Arachidonic acid metabolism);04918(Thyroid hormone synthesis)	K00432	EC:1.11.1.9	glutathione peroxidase 2 [Source:NCBI gene;Acc:767625]	protein_coding	0.415507	0.538624	1.40662	0.521142	0.468674	0.354446	8.2247	0.266937	0.671171	11.0899	0.162592	-2.62067	0.00270851	0.201411	down	yes
MSTRG.32912	CDKL2	ENSSSCT00000009825;ENSSSCT00000045999	GO:0004672(protein kinase activity);GO:0004693(cyclin-dependent protein serine/threonine kinase activity);GO:0005524(ATP binding);GO:0005634(nucleus);GO:0005813(centrosome);GO:0006468(protein phosphorylation);GO:0051726(regulation of cell cycle);GO:0051726(regulation of cell cycle)	NA	K08824	EC:2.7.11.22	cyclin dependent kinase like 2 [Source:NCBI gene;Acc:100737771]	protein_coding	0.1912	0.183477	0.152407	0.154459	0.114094	0.128205	1.16708	0.165856	0.181917	1.85789	0.227264	-2.13756	0.00271226	0.201411	down	yes
MSTRG.35763	ENSSSCG00000012113	ENSSSCT00000013248;ENSSSCT00000032963;ENSSSCT00000034550;ENSSSCT00000013250	GO:0005509(calcium ion binding);GO:0005576(extracellular region);GO:0007275(multicellular organism development);GO:0031214(biomineral tissue development);GO:0042802(identical protein binding);GO:0051260(protein homooligomerization);GO:0062023(collagen-containing extracellular matrix);GO:0070166(enamel mineralization);GO:0099080(supramolecular complex);GO:0099080(supramolecular complex)	NA	NA	NA	amelogenin X-linked [Source:NCBI gene;Acc:396940]	protein_coding	2.06533	2.68051	1.62446	3.18886	1.98435	1.70065	0.372976	0.789732	1.25725	1.17127	2.18136	1.12523	0.00274552	0.202439	up	yes
MSTRG.25417	SLCO1A2	ENSSSCT00000044727;ENSSSCT00000064167;ENSSSCT00000053641;ENSSSCT00000000629;ENSSSCT00000042165;ENSSSCT00000052563;ENSSSCT00000058725	GO:0005215(transporter activity);GO:0005515(protein binding);GO:0005886(plasma membrane);GO:0005887(integral component of plasma membrane);GO:0006811(ion transport);GO:0015125(bile acid transmembrane transporter activity);GO:0015347(sodium-independent organic anion transmembrane transporter activity);GO:0015721(bile acid and bile salt transport);GO:0016020(membrane);GO:0016021(integral component …	04976(Bile secretion);04976(Bile secretion)	K03460	NA	solute carrier organic anion transporter family member 1A2 [Source:NCBI gene;Acc:397534]	protein_coding	0.0726853	0.125021	0.226108	0.149449	0.0681196	0.668241	0.1641	0.58388	0.239719	0.397727	0.312311	-1.67894	0.00274651	0.202439	down	yes
MSTRG.19484	ENSSSCG00000014233	ENSSSCT00000015551	NA	NA	NA	NA	zinc finger protein 474 [Source:NCBI gene;Acc:100525452]	protein_coding	0.278611	0.08902	0.185879	0.086089	0.021132	0.0001	1.85932	0.135248	0.450282	3.91892	0.103825	-3.26777	0.00278545	0.20397	down	yes
MSTRG.36021	ENSSSCG00000031243;ENSSSCG00000031597	ENSSSCT00000049173;ENSSSCT00000040464;ENSSSCT00000038121;ENSSSCT00000043237;ENSSSCT00000047892	GO:0016020(membrane);GO:0016021(integral component of membrane);GO:0016021(integral component of membrane)	NA	NA	NA		protein_coding	0.0595817	0.0369243	0.0598438	0.0566878	0.0614396	0.037213	0.252585	0.268367	0.232246	0.239631	0.266472	-1.90795	0.00281617	0.204537	down	yes
MSTRG.13870	MDH1B	ENSSSCT00000048395;ENSSSCT00000017566;ENSSSCT00000052031	GO:0003824(catalytic activity);GO:0005975(carbohydrate metabolic process);GO:0006099(tricarboxylic acid cycle);GO:0006107(oxaloacetate metabolic process);GO:0006108(malate metabolic process);GO:0006734(NADH metabolic process);GO:0016615(malate dehydrogenase activity);GO:0016616(oxidoreductase activity, acting on the CH-OH group of donors, NAD or NADP as acceptor);GO:0030060(L-malate dehydrogenase…	NA	NA	NA	malate dehydrogenase 1B [Source:NCBI gene;Acc:100621831]	protein_coding	0.0101304	0.00859458	0.0001	0.0001	0.0001	0.0001	0.510362	0.0001	0.0001	0.722888	0.015423	-6.01877	0.00282548	0.204713	down	yes
ENSSSCG00000003951	C1orf210	ENSSSCT00000004370	GO:0016020(membrane);GO:0016021(integral component of membrane)	NA	NA	NA	chromosome 6 C1orf210 homolog [Source:NCBI gene;Acc:100519374]	protein_coding	0.352197	0.195176	0.49233	0.394733	0.07654	0.25226	2.25791	0.680168	1.03161	1.84889	0.248891	-2.00641	0.00286456	0.20654	down	yes
MSTRG.30242	GPX6	ENSSSCT00000001311	GO:0004601(peroxidase activity);GO:0004602(glutathione peroxidase activity);GO:0006979(response to oxidative stress);GO:0055114(oxidation-reduction process);GO:0098869(cellular oxidant detoxification)	00480(Glutathione metabolism);00590(Arachidonic acid metabolism);04918(Thyroid hormone synthesis)	K00432	EC:1.11.1.9	glutathione peroxidase 6 [Source:NCBI gene;Acc:100154091]	protein_coding	0.0308287	0.012181	0.376651	0.0463428	0.032076	0.0601551	1.04213	0.0264996	0.0001	8.91507	0.04959	-4.33381	0.00290079	0.208144	down	yes
MSTRG.19735	PSD2	ENSSSCT00000030535;ENSSSCT00000015688;ENSSSCT00000050292	GO:0005086(ARF guanyl-nucleotide exchange factor activity);GO:0005515(protein binding);GO:0005543(phospholipid binding);GO:0030425(dendrite);GO:0032012(regulation of ARF protein signal transduction);GO:0032154(cleavage furrow);GO:0032587(ruffle membrane);GO:0043025(neuronal cell body);GO:0098794(postsynapse);GO:0098978(glutamatergic synapse);GO:0098978(glutamatergic synapse)	04144(Endocytosis);04144(Endocytosis)	K12494	NA	pleckstrin and Sec7 domain containing 2 [Source:NCBI gene;Acc:100737524]	protein_coding	0.0609589	0.0585231	0.0569334	0.0757996	0.0214595	0.160472	0.223898	0.08357	0.147936	0.266939	0.310002	-1.68965	0.00298155	0.211599	down	yes
MSTRG.23292	ENSSSCG00000031906;SOX17	ENSSSCT00000063671;ENSSSCT00000006855;ENSSSCT00000048899	GO:0004096(catalase activity);GO:0005515(protein binding);GO:0020037(heme binding);GO:0035556(intracellular signal transduction);GO:0055114(oxidation-reduction process);GO:0098869(cellular oxidant detoxification);GO:0000122(negative regulation of transcription by RNA polymerase II);GO:0000981(DNA-binding transcription factor activity, RNA polymerase II-specific);GO:0001228(DNA-binding transcripti…	04310(Wnt signaling pathway)	K19538;K04495	NA	uncharacterized LOC100627466 [Source:NCBI gene;Acc:100627466];SRY-box 17 [Source:NCBI gene;Acc:100154087]	protein_coding	0.260351	0.449188	1.12129	0.942847	0.468468	0.610143	4.61193	0.679702	0.396105	6.44913	0.254346	-1.97514	0.00298448	0.211599	down	yes
MSTRG.14177	IQCA1	ENSSSCT00000051935;ENSSSCT00000017774	GO:0005515(protein binding);GO:0005524(ATP binding);GO:0005524(ATP binding)	NA	NA	NA	IQ motif containing with AAA domain 1 [Source:NCBI gene;Acc:100515512]	protein_coding	0.00972385	0.167508	0.0298075	0.0001	0.0103865	0.0001	2.15706	0.0001	0.207842	4.44864	0.0319246	-4.96919	0.00303399	0.214599	down	yes
MSTRG.34551	TRIM29	ENSSSCT00000054814;ENSSSCT00000047156;ENSSSCT00000016492	GO:0000122(negative regulation of transcription by RNA polymerase II);GO:0002039(p53 binding);GO:0005737(cytoplasm);GO:0008270(zinc ion binding);GO:0042802(identical protein binding);GO:1900181(negative regulation of protein localization to nucleus);GO:1900181(negative regulation of protein localization to nucleus)	NA	K12010	NA	tripartite motif containing 29 [Source:NCBI gene;Acc:100520758]	protein_coding	0.0579015	0.0001	0.0133453	0.00693474	0.0001	0.00646439	1.02709	0.0001	0.00563828	1.50441	0.030814	-5.02027	0.0030959	0.216917	down	yes
MSTRG.29327	UBE2U	ENSSSCT00000004217;ENSSSCT00000056829	GO:0000166(nucleotide binding);GO:0000209(protein polyubiquitination);GO:0000790(nuclear chromatin);GO:0005524(ATP binding);GO:0006281(DNA repair);GO:0016740(transferase activity);GO:0033503(HULC complex);GO:0043161(proteasome-mediated ubiquitin-dependent protein catabolic process);GO:0061631(ubiquitin conjugating enzyme activity);GO:0061631(ubiquitin conjugating enzyme activity)	04120(Ubiquitin mediated proteolysis);04120(Ubiquitin mediated proteolysis)	K10584	EC:2.3.2.23	ubiquitin conjugating enzyme E2 U [Source:NCBI gene;Acc:100519034]	protein_coding	0.167891	0.0609399	0.208818	0.309271	0.204758	0.137811	1.52823	0.262771	0.115879	2.4736	0.210628	-2.24723	0.00310406	0.216978	down	yes
ENSSSCG00000010960	SLC28A3	ENSSSCT00000011997	GO:0005337(nucleoside transmembrane transporter activity);GO:0005415(nucleoside:sodium symporter activity);GO:0005887(integral component of plasma membrane);GO:0015389(pyrimidine- and adenine-specific:sodium symporter activity);GO:0015390(purine-specific nucleoside:sodium symporter activity);GO:0015855(pyrimidine nucleobase transport);GO:0015860(purine nucleoside transmembrane transport);GO:00158…	NA	K11536	NA	solute carrier family 28 member 3 [Source:NCBI gene;Acc:100621750]	protein_coding	0.041267	0.018312	0.026333	0.039412	0.035301	0.006367	0.941416	0.0001	0.074652	0.608093	0.098505	-3.34366	0.00314867	0.219068	down	yes
MSTRG.5661	CCDC40	ENSSSCT00000018682;ENSSSCT00000025111	GO:0001947(heart looping);GO:0003341(cilium movement);GO:0003351(epithelial cilium movement);GO:0003356(regulation of cilium beat frequency);GO:0005737(cytoplasm);GO:0005929(cilium);GO:0005930(axoneme);GO:0030317(flagellated sperm motility);GO:0030324(lung development);GO:0031514(motile cilium);GO:0035082(axoneme assembly);GO:0035469(determination of pancreatic left/right asymmetry);GO:0036159(in…	NA	NA	NA	coiled-coil domain containing 40 [Source:NCBI gene;Acc:100514181]	protein_coding	0.224948	0.175786	0.312402	0.047641	0.120598	0.181161	1.59659	0.123709	0.103937	2.94058	0.1782	-2.48843	0.00317136	0.220132	down	yes
MSTRG.982	FRK	ENSSSCT00000004899	GO:0000122(negative regulation of transcription by RNA polymerase II);GO:0000166(nucleotide binding);GO:0004672(protein kinase activity);GO:0004713(protein tyrosine kinase activity);GO:0004715(non-membrane spanning protein tyrosine kinase activity);GO:0005102(signaling receptor binding);GO:0005515(protein binding);GO:0005524(ATP binding);GO:0005634(nucleus);GO:0005829(cytosol);GO:0006468(protein …	NA	K08892	EC:2.7.10.2	fyn related Src family tyrosine kinase [Source:NCBI gene;Acc:100157810]	protein_coding	0.0001	0.011832	0.047278	0.03813	0.012631	0.009964	0.897181	0.0001	0.029311	0.791097	0.0636534	-3.97362	0.00318025	0.220236	down	yes
MSTRG.16131	C20orf85	ENSSSCT00000008225	NA	NA	NA	NA	chromosome 17 C20orf85 homolog [Source:NCBI gene;Acc:100144513]	protein_coding	0.0001	0.0001	0.2802	0.0678123	0.0001	0.0001	6.77735	0.0001	0.0573998	11.7362	0.0187556	-5.73654	0.00319822	0.220967	down	yes
MSTRG.12649	CFAP46	ENSSSCT00000011779;ENSSSCT00000011782;ENSSSCT00000060365	GO:0035082(axoneme assembly);GO:0060294(cilium movement involved in cell motility);GO:0060294(cilium movement involved in cell motility)	NA	NA	NA	cilia and flagella associated protein 46 [Source:NCBI gene;Acc:100158140]	protein_coding	1.19935	1.45378	1.44416	0.854039	0.855665	1.21356	5.30959	1.04653	1.41238	8.61831	0.329935	-1.59974	0.00321742	0.221567	down	yes
MSTRG.32889	RASSF6	ENSSSCT00000009806	GO:0007165(signal transduction);GO:0042981(regulation of apoptotic process)	04390(Hippo signaling pathway);04392(Hippo signaling pathway - multiple species)	K09854	NA	Ras association domain family member 6 [Source:NCBI gene;Acc:100525351]	protein_coding	0.701926	1.2479	0.936215	1.31326	0.615078	1.65895	2.27855	1.90725	2.34558	2.96613	0.431533	-1.21246	0.00323475	0.221946	down	yes
MSTRG.29546	SCP2	ENSSSCT00000004265;ENSSSCT00000050835;ENSSSCT00000023638	GO:0003824(catalytic activity);GO:0005515(protein binding);GO:0005518(collagen binding);GO:0005615(extracellular space);GO:0005737(cytoplasm);GO:0006694(steroid biosynthetic process);GO:0008285(negative regulation of cell population proliferation);GO:0015914(phospholipid transport);GO:0016740(transferase activity);GO:0016746(transferase activity, transferring acyl groups);GO:0016747(transferase a…	00120(Primary bile acid biosynthesis);01040(Biosynthesis of unsaturated fatty acids);03320(PPAR signaling pathway);04146(Peroxisome);04146(Peroxisome)	K08764	EC:2.3.1.176	sterol carrier protein 2 [Source:NCBI gene;Acc:397439]	protein_coding	3.00836	1.88967	2.78992	4.08418	2.74348	3.45918	51.4653	1.9196	2.90709	3.3732	0.229953	-2.12059	0.0032459	0.222199	down	yes
MSTRG.8854	PLCH1	ENSSSCT00000054380;ENSSSCT00000052117;ENSSSCT00000043094;ENSSSCT00000045003;ENSSSCT00000038534;ENSSSCT00000027658	GO:0004435(phosphatidylinositol phospholipase C activity);GO:0005509(calcium ion binding);GO:0005737(cytoplasm);GO:0005829(cytosol);GO:0005886(plasma membrane);GO:0006629(lipid metabolic process);GO:0007165(signal transduction);GO:0008081(phosphoric diester hydrolase activity);GO:0016020(membrane);GO:0016042(lipid catabolic process);GO:0016787(hydrolase activity);GO:0032959(inositol trisphosphate…	00562(Inositol phosphate metabolism);00562(Inositol phosphate metabolism)	K19006	EC:3.1.4.11	phospholipase C eta 1 [Source:NCBI gene;Acc:100627163]	protein_coding	0.185041	0.142949	0.163137	0.148326	0.283735	0.164127	1.33966	0.0999141	0.167664	2.4651	0.217915	-2.19816	0.00334317	0.22729	down	yes
MSTRG.29038	KLHL14	ENSSSCT00000004133;ENSSSCT00000049098	GO:0005515(protein binding);GO:0005783(endoplasmic reticulum);GO:0005829(cytosol);GO:0015629(actin cytoskeleton);GO:0016235(aggresome);GO:0043005(neuron projection);GO:0043025(neuronal cell body);GO:0043025(neuronal cell body)	NA	K10451	NA	kelch like family member 14 [Source:NCBI gene;Acc:100518133]	protein_coding	0.0001	0.0241339	0.0755518	0.0392469	0.0001	0.0001	1.09149	0.0177421	0.0413223	1.81	0.0469939	-4.41138	0.00340332	0.230327	down	yes
MSTRG.25468	PLBD1	ENSSSCT00000032057;ENSSSCT00000000659;ENSSSCT00000042247;ENSSSCT00000042458;ENSSSCT00000049910;ENSSSCT00000032529	GO:0000166(nucleotide binding);GO:0001653(peptide receptor activity);GO:0004383(guanylate cyclase activity);GO:0004672(protein kinase activity);GO:0005524(ATP binding);GO:0005886(plasma membrane);GO:0006182(cGMP biosynthetic process);GO:0006468(protein phosphorylation);GO:0006629(lipid metabolic process);GO:0007165(signal transduction);GO:0007168(receptor guanylyl cyclase signaling pathway);GO:00…	00230(Purine metabolism);00230(Purine metabolism)	K12320	EC:4.6.1.2	phospholipase B domain containing 1 [Source:NCBI gene;Acc:100155493]	protein_coding	8.74124	2.41798	1.0377	3.72292	2.08884	3.84345	120.202	2.51105	3.15146	1.3589	0.1374	-2.86354	0.00344941	0.23239	down	yes
ENSSSCG00000021645	MROH2B	ENSSSCT00000023181	GO:0001669(acrosomal vesicle);GO:0005737(cytoplasm);GO:0010737(protein kinase A signaling);GO:0036126(sperm flagellum);GO:0097225(sperm midpiece)	NA	NA	NA	maestro heat like repeat family member 2B [Source:NCBI gene;Acc:100521872]	protein_coding	0.174684	0.089141	0.182731	0.273493	0.389284	0.077423	0.0001	0.034024	0.102851	0.024717	4.63933	2.21392	0.00364647	0.241834	up	yes
MSTRG.18446	ENSSSCG00000013714	ENSSSCT00000014979	GO:0016020(membrane);GO:0016021(integral component of membrane)	NA	NA	NA		protein_coding	0.376572	0.978691	1.50417	2.04375	1.18747	1.83945	8.34393	0.0908879	1.46264	19.5933	0.194402	-2.36288	0.00365808	0.241834	down	yes
MSTRG.28276	PADI2	ENSSSCT00000027772;ENSSSCT00000058302;ENSSSCT00000058704	GO:0004668(protein-arginine deiminase activity);GO:0005509(calcium ion binding);GO:0005634(nucleus);GO:0005737(cytoplasm);GO:0010848(regulation of chromatin disassembly);GO:0018101(protein citrullination);GO:0030331(estrogen receptor binding);GO:0030520(intracellular estrogen receptor signaling pathway);GO:0035327(transcriptionally active chromatin);GO:0036413(histone H3-R26 citrullination);GO:00…	NA	K01481	EC:3.5.3.15	peptidyl arginine deiminase 2 [Source:NCBI gene;Acc:100621356]	protein_coding	0.389422	0.229922	1.04232	0.356401	0.053175	0.508741	5.78707	0.246532	0.340633	4.17431	0.187319	-2.41643	0.003662	0.241834	down	yes
MSTRG.12842	MAP3K19	ENSSSCT00000049026;ENSSSCT00000017096	GO:0004672(protein kinase activity);GO:0004674(protein serine/threonine kinase activity);GO:0005515(protein binding);GO:0005524(ATP binding);GO:0005737(cytoplasm);GO:0006468(protein phosphorylation);GO:0023014(signal transduction by protein phosphorylation);GO:0031098(stress-activated protein kinase signaling cascade);GO:0032147(activation of protein kinase activity);GO:0032147(activation of prot…	NA	K17533	EC:2.7.11.25	mitogen-activated protein kinase kinase kinase 19 [Source:NCBI gene;Acc:100511286]	protein_coding	0.019142	0.0001	0.075548	0.0001	0.02801	0.0001	1.57032	0.0001	0.037746	2.62694	0.0290186	-5.10688	0.00367605	0.241834	down	yes
MSTRG.735	ENSSSCG00000004302	ENSSSCT00000004756;ENSSSCT00000059405	NA	NA	NA	NA	cilia and flagella associated protein 206 [Source:NCBI gene;Acc:100517793]	protein_coding	0.13247	0.156227	0.0205804	0.0935028	0.0952191	0.109277	1.53765	0.061935	0.0713971	1.36048	0.158561	-2.65689	0.00367658	0.241834	down	yes
MSTRG.7741	LTF	ENSSSCT00000030564	GO:0001530(lipopolysaccharide binding);GO:0001817(regulation of cytokine production);GO:0002227(innate immune response in mucosa);GO:0004252(serine-type endopeptidase activity);GO:0004869(cysteine-type endopeptidase inhibitor activity);GO:0005506(iron ion binding);GO:0005576(extracellular region);GO:0005615(extracellular space);GO:0005737(cytoplasm);GO:0006508(proteolysis);GO:0008201(heparin bind…	NA	K17283	EC:3.4.21.-	lactotransferrin [Source:NCBI gene;Acc:397649]	protein_coding	0.008493	0.033506	0.688062	0.0001	0.035071	0.051419	13.5112	0.017557	0.045601	4.39214	0.0424707	-4.55739	0.00367891	0.241834	down	yes
MSTRG.24391	TTLL8	ENSSSCT00000062630;ENSSSCT00000047120;ENSSSCT00000001072;ENSSSCT00000065642	GO:0005929(cilium);GO:0005930(axoneme);GO:0006464(cellular protein modification process);GO:0015630(microtubule cytoskeleton);GO:0018094(protein polyglycylation);GO:0060271(cilium assembly);GO:0070735(protein-glycine ligase activity);GO:0070736(protein-glycine ligase activity, initiating);GO:0070736(protein-glycine ligase activity, initiating)	NA	K16608	EC:6.3.2.-	tubulin tyrosine ligase like 8 [Source:NCBI gene;Acc:100520675]	protein_coding	0.0001	0.070255	0.0664922	0.0628005	0.0001	0.0278515	0.93564	0.0001	0.123531	2.51782	0.0554095	-4.17372	0.003738	0.243699	down	yes
MSTRG.28233	FHAD1	ENSSSCT00000027709;ENSSSCT00000044638;ENSSSCT00000003836;ENSSSCT00000059686;ENSSSCT00000003837	GO:0005515(protein binding);GO:0005515(protein binding)	NA	NA	NA	forkhead associated phosphopeptide binding domain 1 [Source:NCBI gene;Acc:100627409]	protein_coding	0.176455	0.863125	0.441908	0.353031	0.535342	0.610744	2.40024	0.512628	0.642283	3.63503	0.303792	-1.71884	0.00374636	0.243699	down	yes
MSTRG.13978	CATIP	ENSSSCT00000017627	GO:0005634(nucleus);GO:0005737(cytoplasm);GO:0005886(plasma membrane);GO:0015629(actin cytoskeleton);GO:0030041(actin filament polymerization);GO:0044782(cilium organization)	NA	NA	NA	ciliogenesis associated TTC17 interacting protein [Source:NCBI gene;Acc:100155612]	protein_coding	0.0001	0.017664	0.048157	0.052592	0.044574	0.008543	0.764217	0.027793	0.055927	0.533709	0.117313	-3.09157	0.00374982	0.243699	down	yes
ENSSSCG00000024336	TMPRSS2	ENSSSCT00000026685;ENSSSCT00000043471;ENSSSCT00000041631;ENSSSCT00000013212	GO:0004252(serine-type endopeptidase activity);GO:0005044(scavenger receptor activity);GO:0005515(protein binding);GO:0005886(plasma membrane);GO:0006508(proteolysis);GO:0006898(receptor-mediated endocytosis);GO:0008233(peptidase activity);GO:0008236(serine-type peptidase activity);GO:0016020(membrane);GO:0016021(integral component of membrane);GO:0016540(protein autoprocessing);GO:0016787(hydrol…	05164(Influenza A);05202(Transcriptional misregulation in cancer);05215(Prostate cancer);05215(Prostate cancer)	K09633	EC:3.4.21.-	transmembrane serine protease 2 [Source:NCBI gene;Acc:100739292]	protein_coding	0.0001	0.0001	0.0205285	0.0001	0.0001	0.0001	0.477778	0.0001	0.0001	0.898945	0.0151984	-6.03994	0.00379248	0.244973	down	yes
MSTRG.10810	OAS2	ENSSSCT00000010831;ENSSSCT00000054896;ENSSSCT00000063498;ENSSSCT00000045243	GO:0001730(2'-5'-oligoadenylate synthetase activity);GO:0003723(RNA binding);GO:0003725(double-stranded RNA binding);GO:0005524(ATP binding);GO:0005634(nucleus);GO:0005654(nucleoplasm);GO:0005829(cytosol);GO:0006401(RNA catabolic process);GO:0006955(immune response);GO:0009617(response to bacterium);GO:0016740(transferase activity);GO:0016779(nucleotidyltransferase activity);GO:0043231(intracellu…	04621(NOD-like receptor signaling pathway);05160(Hepatitis C);05162(Measles);05164(Influenza A);05168(Herpes simplex virus 1 infection);05169(Epstein-Barr virus infection);05169(Epstein-Barr virus infection)	K14216	EC:2.7.7.84	2'-5'-oligoadenylate synthetase 2 [Source:NCBI gene;Acc:595128]	protein_coding	3.73219	3.43022	2.40496	38.1506	3.75302	1.81863	3.94072	2.99475	1.63372	3.65349	3.66568	1.87408	0.00380185	0.245046	up	yes
MSTRG.22896	ERICH5	ENSSSCT00000025911	NA	NA	NA	NA	glutamate rich 5 [Source:NCBI gene;Acc:100739122]	protein_coding	0.0001	0.060108	0.143059	0.0001	0.016344	0.201762	0.90413	0.045753	0.02017	1.26318	0.0902304	-3.47024	0.00384672	0.246339	down	yes
MSTRG.14268	ROPN1L	ENSSSCT00000057381;ENSSSCT00000022727	GO:0001932(regulation of protein phosphorylation);GO:0003341(cilium movement);GO:0005737(cytoplasm);GO:0005929(cilium);GO:0030317(flagellated sperm motility);GO:0031514(motile cilium);GO:0048240(sperm capacitation);GO:0048240(sperm capacitation)	NA	NA	NA	rhophilin associated tail protein 1 like [Source:NCBI gene;Acc:100620566]	protein_coding	0.213094	0.484742	0.525755	0.448714	0.279978	0.331071	2.38584	0.472311	0.284648	4.03489	0.260001	-1.94341	0.00386684	0.247096	down	yes
MSTRG.14238	CROCC2	ENSSSCT00000047621	NA	NA	NA	NA	ciliary rootlet coiled-coil, rootletin family member 2 [Source:NCBI gene;Acc:102161907]	protein_coding	0.134756	0.0584242	0.106951	0.0324421	0.103758	0.0001	1.0379	0.0605424	0.130744	2.75979	0.109381	-3.19256	0.00395463	0.250555	down	yes
MSTRG.10103	MX2	ENSSSCT00000055212;ENSSSCT00000060954;ENSSSCT00000013209	GO:0000166(nucleotide binding);GO:0000266(mitochondrial fission);GO:0002376(immune system process);GO:0003374(dynamin family protein polymerization involved in mitochondrial fission);GO:0003924(GTPase activity);GO:0005525(GTP binding);GO:0005634(nucleus);GO:0005643(nuclear pore);GO:0005737(cytoplasm);GO:0008017(microtubule binding);GO:0009615(response to virus);GO:0016020(membrane);GO:0031966(mit…	NA	NA	NA	Interferon-induced GTP-binding protein Mx2 [Source:UniProtKB/Swiss-Prot;Acc:A7VK00]	protein_coding	2.47624	1.46928	3.75506	57.2987	2.31678	1.82496	5.27712	1.60748	0.858385	2.98469	5.3627	2.42296	0.0039877	0.251958	up	yes
MSTRG.11636	CFAP70	ENSSSCT00000011271	GO:0005515(protein binding)	NA	NA	NA	cilia and flagella associated protein 70 [Source:NCBI gene;Acc:100516698]	protein_coding	0.642572	1.08371	1.48728	1.16121	0.778577	1.4522	3.90616	1.26563	2.10472	4.24435	0.397235	-1.33194	0.00399369	0.251958	down	yes
MSTRG.3485	CFAP77	ENSSSCT00000006298	NA	NA	NA	NA	cilia and flagella associated protein 77 [Source:NCBI gene;Acc:102166697]	protein_coding	0.0001	0.019345	0.079486	0.0001	0.019521	0.059845	0.497912	0.017407	0.009749	0.82004	0.0843815	-3.56693	0.00402847	0.253615	down	yes
MSTRG.4215	ARMC4	ENSSSCT00000064730;ENSSSCT00000057630;ENSSSCT00000012113;ENSSSCT00000058668;ENSSSCT00000026458	GO:0003341(cilium movement);GO:0003356(regulation of cilium beat frequency);GO:0005515(protein binding);GO:0005930(axoneme);GO:0007368(determination of left/right symmetry);GO:0036158(outer dynein arm assembly);GO:0097546(ciliary base);GO:0097546(ciliary base)	NA	NA	NA	armadillo repeat containing 4 [Source:NCBI gene;Acc:100516925]	protein_coding	0.292344	1.51398	0.803822	1.1352	1.16024	2.55714	5.0174	1.37806	0.394733	7.5256	0.290737	-1.78221	0.00405024	0.253993	down	yes
MSTRG.30781	PAQR8	ENSSSCT00000001956;ENSSSCT00000061228	GO:0003707(steroid hormone receptor activity);GO:0005496(steroid binding);GO:0005794(Golgi apparatus);GO:0005886(plasma membrane);GO:0007275(multicellular organism development);GO:0008289(lipid binding);GO:0016020(membrane);GO:0016021(integral component of membrane);GO:0030154(cell differentiation);GO:0038023(signaling receptor activity);GO:0043401(steroid hormone mediated signaling pathway);GO:0…	NA	NA	NA	progestin and adipoQ receptor family member 8 [Source:NCBI gene;Acc:396559]	protein_coding	1.40205	1.75373	0.82168	0.955144	1.21101	2.13763	3.51069	1.49718	1.60437	7.03995	0.389087	-1.36184	0.00405153	0.253993	down	yes
MSTRG.9405	ENSSSCG00000028717	ENSSSCT00000022527;ENSSSCT00000037944	GO:0001932(regulation of protein phosphorylation);GO:0005737(cytoplasm);GO:0030317(flagellated sperm motility);GO:0044782(cilium organization);GO:0048240(sperm capacitation);GO:0061512(protein localization to cilium);GO:0097228(sperm principal piece);GO:0097598(sperm cytoplasmic droplet);GO:0097598(sperm cytoplasmic droplet)	NA	NA	NA	rhophilin associated tail protein 1 [Source:NCBI gene;Acc:100359353]	protein_coding	0.117916	0.225642	0.0001	0.198366	0.0995267	0.168888	1.80652	0.11709	0.186886	2.15873	0.144555	-2.79031	0.00406743	0.254454	down	yes
MSTRG.17926	SVIP	ENSSSCT00000055493	GO:0005789(endoplasmic reticulum membrane);GO:0010508(positive regulation of autophagy);GO:0031225(anchored component of membrane);GO:0031333(negative regulation of protein complex assembly);GO:0043621(protein self-association);GO:0051117(ATPase binding);GO:1903061(positive regulation of protein lipidation);GO:1903070(negative regulation of ER-associated ubiquitin-dependent protein catabolic proc…	04141(Protein processing in endoplasmic reticulum)	K14014	NA	small VCP interacting protein [Source:NCBI gene;Acc:100625679]	protein_coding	0.686559	0.076936	0.033049	0.146024	0.100154	0.284198	5.83508	0.08869	0.39076	0.635543	0.144136	-2.79449	0.00418138	0.261034	down	yes
MSTRG.4885	ENSSSCG00000009333	ENSSSCT00000010227;ENSSSCT00000010228	GO:0005515(protein binding);GO:0005515(protein binding)	NA	NA	NA		protein_coding	0.0001	0.0177499	0.090108	0.0300678	0.0507269	0.0001	1.28802	0.0259093	0.0357221	1.01029	0.0799786	-3.64424	0.00438218	0.27161	down	yes
ENSSSCG00000003437	TNFRSF8	ENSSSCT00000003815;ENSSSCT00000035406	GO:0004888(transmembrane signaling receptor activity);GO:0005515(protein binding);GO:0007165(signal transduction);GO:0016020(membrane);GO:0016021(integral component of membrane);GO:0042535(positive regulation of tumor necrosis factor biosynthetic process);GO:0043065(positive regulation of apoptotic process);GO:0045556(positive regulation of TRAIL biosynthetic process);GO:0051092(positive regulati…	04060(Cytokine-cytokine receptor interaction);04060(Cytokine-cytokine receptor interaction)	K05145	NA	TNF receptor superfamily member 8 [Source:NCBI gene;Acc:100737399]	protein_coding	0.588025	0.018163	0.599075	0.519824	0.417874	0.0485706	0.13418	0.128922	0.0416332	0.116485	4.56152	2.18951	0.00443092	0.273176	up	yes
ENSSSCG00000008118	PROM2	ENSSSCT00000008894;ENSSSCT00000045091;ENSSSCT00000049453;ENSSSCT00000024943	GO:0001934(positive regulation of protein phosphorylation);GO:0005886(plasma membrane);GO:0005887(integral component of plasma membrane);GO:0005902(microvillus);GO:0005929(cilium);GO:0009986(cell surface);GO:0015485(cholesterol binding);GO:0016020(membrane);GO:0016021(integral component of membrane);GO:0016324(apical plasma membrane);GO:0031346(positive regulation of cell projection organization)…	NA	K15602	NA	prominin 2 [Source:NCBI gene;Acc:100521959]	protein_coding	0.0732673	0.0474074	0.13281	0.0910294	0.189742	0.0894559	0.324035	0.134387	0.127594	1.73803	0.221362	-2.17552	0.00445842	0.273599	down	yes
ENSSSCG00000024223	ARHGEF16	ENSSSCT00000053924;ENSSSCT00000038247;ENSSSCT00000030569	GO:0005089(Rho guanyl-nucleotide exchange factor activity);GO:0005515(protein binding);GO:0017048(Rho GTPase binding);GO:0030165(PDZ domain binding);GO:0030971(receptor tyrosine kinase binding);GO:0035023(regulation of Rho protein signal transduction);GO:0060326(cell chemotaxis);GO:0090630(activation of GTPase activity);GO:1903078(positive regulation of protein localization to plasma membrane);GO…	NA	K20688	NA	Rho guanine nucleotide exchange factor 16 [Source:NCBI gene;Acc:100625324]	protein_coding	0.0766591	0.0720045	0.110945	0.250209	0.11181	0.149476	0.721367	0.0736663	0.101308	1.88354	0.212206	-2.23646	0.00446535	0.273599	down	yes
MSTRG.8852	MME;ENSSSCG00000039895	ENSSSCT00000034901;ENSSSCT00000043507;ENSSSCT00000062857;ENSSSCT00000032959;ENSSSCT00000054801;ENSSSCT00000012833	GO:0001786(phosphatidylserine binding);GO:0001822(kidney development);GO:0004175(endopeptidase activity);GO:0004222(metalloendopeptidase activity);GO:0005737(cytoplasm);GO:0005769(early endosome);GO:0005802(trans-Golgi network);GO:0005886(plasma membrane);GO:0005903(brush border);GO:0006508(proteolysis);GO:0006518(peptide metabolic process);GO:0007568(aging);GO:0007611(learning or memory);GO:0008…	04614(Renin-angiotensin system);04640(Hematopoietic cell lineage);04974(Protein digestion and absorption);05010(Alzheimer disease);05010(Alzheimer disease)	K01389	EC:3.4.24.11	membrane metalloendopeptidase [Source:NCBI gene;Acc:100511536]	protein_coding	4.53314	5.0962	1.98484	6.74385	2.47823	5.23512	61.5771	4.00613	8.27614	2.63556	0.25494	-1.97177	0.0045302	0.277003	down	yes
ENSSSCG00000030511	LGR5	ENSSSCT00000065315;ENSSSCT00000049328;ENSSSCT00000053080;ENSSSCT00000062849;ENSSSCT00000029371	GO:0001942(hair follicle development);GO:0004888(transmembrane signaling receptor activity);GO:0004930(G protein-coupled receptor activity);GO:0005515(protein binding);GO:0005887(integral component of plasma membrane);GO:0007186(G protein-coupled receptor signaling pathway);GO:0009994(oocyte differentiation);GO:0016020(membrane);GO:0016021(integral component of membrane);GO:0016500(protein-hormon…	04310(Wnt signaling pathway);04310(Wnt signaling pathway)	K04308	NA	leucine rich repeat containing G protein-coupled receptor 5 [Source:NCBI gene;Acc:100151994]	protein_coding	0.00468601	0.0001	0.102285	0.0239225	0.115744	0.0278862	0.988507	0.0311963	0.0805766	1.33722	0.100081	-3.32076	0.00455492	0.277689	down	yes
ENSSSCG00000031717	ADCY8	ENSSSCT00000061510;ENSSSCT00000050873;ENSSSCT00000052243	GO:0000166(nucleotide binding);GO:0004016(adenylate cyclase activity);GO:0005524(ATP binding);GO:0005886(plasma membrane);GO:0006171(cAMP biosynthetic process);GO:0007613(memory);GO:0007616(long-term memory);GO:0007626(locomotory behavior);GO:0008294(calcium- and calmodulin-responsive adenylate cyclase activity);GO:0009190(cyclic nucleotide biosynthetic process);GO:0010255(glucose mediated signal…	00230(Purine metabolism);01522(Endocrine resistance);04015(Rap1 signaling pathway);04020(Calcium signaling pathway);04022(cGMP-PKG signaling pathway);04024(cAMP signaling pathway);04062(Chemokine signaling pathway);04072(Phospholipase D signaling pathway);04114(Oocyte meiosis);04211(Longevity regulating pathway);04213(Longevity regulating pathway - multiple species);04261(Adrenergic signaling in …	K08048	EC:4.6.1.1	adenylate cyclase 8 [Source:NCBI gene;Acc:100622999]	protein_coding	0.431743	0.196565	0.356436	0.269394	0.226033	0.114724	0.0593666	0.050954	0.200989	0.123325	2.69436	1.42994	0.0045694	0.277689	up	yes
MSTRG.3110	SLC46A2	ENSSSCT00000006018;ENSSSCT00000064643	GO:0009986(cell surface);GO:0016020(membrane);GO:0016021(integral component of membrane);GO:0043029(T cell homeostasis);GO:0045580(regulation of T cell differentiation);GO:0048538(thymus development);GO:0055085(transmembrane transport);GO:0070233(negative regulation of T cell apoptotic process);GO:0070233(negative regulation of T cell apoptotic process)	NA	K14614	NA	solute carrier family 46 member 2 [Source:NCBI gene;Acc:100157182]	protein_coding	0.313662	0.500556	0.578032	0.814711	0.730498	1.74674	2.08882	1.68912	0.611049	1.14921	0.403224	-1.31035	0.00460793	0.278892	down	yes
MSTRG.34332	EXPH5	ENSSSCT00000053995;ENSSSCT00000016374	GO:0003334(keratinocyte development);GO:0005768(endosome);GO:0006886(intracellular protein transport);GO:0017137(Rab GTPase binding);GO:0045921(positive regulation of exocytosis);GO:0050714(positive regulation of protein secretion);GO:0071985(multivesicular body sorting pathway);GO:0071985(multivesicular body sorting pathway)	NA	NA	NA	KDEL motif-containing protein 2 [Source:NCBI gene;Acc:100512977]	protein_coding	0.166922	0.195544	0.347959	0.477732	0.250748	0.403024	2.081	0.130893	0.191971	2.95723	0.249631	-2.00213	0.00469734	0.28258	down	yes
MSTRG.34707	ST14	ENSSSCT00000065952;ENSSSCT00000016615	GO:0001843(neural tube closure);GO:0004252(serine-type endopeptidase activity);GO:0005515(protein binding);GO:0005576(extracellular region);GO:0006508(proteolysis);GO:0008233(peptidase activity);GO:0008236(serine-type peptidase activity);GO:0016020(membrane);GO:0016021(integral component of membrane);GO:0016787(hydrolase activity);GO:0019897(extrinsic component of plasma membrane);GO:0030216(kera…	05206(MicroRNAs in cancer);05206(MicroRNAs in cancer)	K08670	EC:3.4.21.109	suppression of tumorigenicity 14 [Source:NCBI gene;Acc:100517843]	protein_coding	0.144978	0.508027	0.979715	0.846502	0.231588	1.43908	2.41407	0.621724	0.465065	5.02311	0.272087	-1.87786	0.0047517	0.284556	down	yes
ENSSSCG00000012558	PIH1D3	ENSSSCT00000033177	GO:0003341(cilium movement);GO:0030317(flagellated sperm motility);GO:0070286(axonemal dynein complex assembly)	NA	NA	NA	PIH1 domain containing 3 [Source:NCBI gene;Acc:100516946]	protein_coding	0.0001	0.074933	0.0001	0.026832	0.05333	0.073618	0.768114	0.0001	0.157914	0.599403	0.097111	-3.36422	0.00478241	0.284556	down	yes
MSTRG.6937	ENSSSCG00000036977	ENSSSCT00000056059	GO:0016020(membrane);GO:0016021(integral component of membrane)	NA	NA	NA	uncharacterized LOC110256101 [Source:NCBI gene;Acc:110256101]	protein_coding	0.362826	1.23027	1.40863	0.939008	1.42965	1.44008	19.217	1.04787	1.68521	0.78689	0.222127	-2.17054	0.00478546	0.284556	down	yes
ENSSSCG00000033806	ENSSSCG00000033806	ENSSSCT00000058854	GO:0004930(G protein-coupled receptor activity);GO:0005886(plasma membrane);GO:0007165(signal transduction);GO:0007186(G protein-coupled receptor signaling pathway);GO:0015054(gastrin receptor activity);GO:0016020(membrane);GO:0016021(integral component of membrane)	04020(Calcium signaling pathway);04080(Neuroactive ligand-receptor interaction);04971(Gastric acid secretion)	K04195	NA	cholecystokinin B receptor [Source:NCBI gene;Acc:100625698]	protein_coding	0.02859	0.089731	0.012391	0.030202	0.07774	0.025316	0.786684	0.249933	0.004935	0.524343	0.149983	-2.73713	0.00479137	0.284556	down	yes
MSTRG.1016	SH3BGRL2	ENSSSCT00000045246	GO:0005654(nucleoplasm);GO:0031965(nuclear membrane)	NA	NA	NA	SH3 domain binding glutamate rich protein like 2 [Source:NCBI gene;Acc:100510992]	protein_coding	5.75373	10.1133	6.56139	6.7201	7.42522	13.4152	28.8074	14.0817	5.53762	19.9211	0.447314	-1.16064	0.00480618	0.284556	down	yes
MSTRG.7365	EFHB	ENSSSCT00000012271	GO:0005509(calcium ion binding)	NA	NA	NA	EF-hand domain family member B [Source:NCBI gene;Acc:100519922]	protein_coding	0.000843	0.035661	0.030283	0.026848	0.0001	0.0001	0.658462	0.0001	0.033468	0.899213	0.0589031	-4.08551	0.00481618	0.284556	down	yes
MSTRG.17171	ENSSSCG00000032591;ENSSSCG00000032436;IFITM3	ENSSSCT00000038403;ENSSSCT00000056915;ENSSSCT00000058772;ENSSSCT00000055602;ENSSSCT00000026880;ENSSSCT00000015914;ENSSSCT00000053113	GO:0005886(plasma membrane);GO:0016020(membrane);GO:0016021(integral component of membrane);GO:0034341(response to interferon-gamma);GO:0035455(response to interferon-alpha);GO:0035456(response to interferon-beta);GO:0045071(negative regulation of viral genome replication);GO:0046597(negative regulation of viral entry into host cell);GO:0051607(defense response to virus);GO:0060337(type I interfe…	NA	K06566	NA	interferon-induced transmembrane protein 1-like [Source:NCBI gene;Acc:102161418];interferon-induced transmembrane protein 1-like [Source:NCBI gene;Acc:100626247];interferon induced transmembrane protein 3 [Source:NCBI gene;Acc:100518544]	protein_coding	5.08798	3.00627	6.98751	19.0053	11.574	2.63489	4.59295	2.61527	3.21779	5.93217	2.40409	1.26549	0.00492433	0.288655	up	yes
MSTRG.34801	PIGR	ENSSSCT00000017048;ENSSSCT00000062912;ENSSSCT00000056679;ENSSSCT00000017054;ENSSSCT00000065276	GO:0001580(detection of chemical stimulus involved in sensory perception of bitter taste);GO:0001792(polymeric immunoglobulin receptor activity);GO:0002415(immunoglobulin transcytosis in epithelial cells mediated by polymeric immunoglobulin receptor);GO:0005615(extracellular space);GO:0005886(plasma membrane);GO:0007173(epidermal growth factor receptor signaling pathway);GO:0016020(membrane);GO:0…	04672(Intestinal immune network for IgA production);04672(Intestinal immune network for IgA production)	K13073	NA	polymeric immunoglobulin receptor [Source:NCBI gene;Acc:397315]	protein_coding	0.208304	0.473839	1.19231	1.10509	0.371029	0.972117	11.6306	0.889988	0.21055	1.71718	0.217282	-2.20236	0.0051161	0.296973	down	yes
ENSSSCG00000002734	MARVELD3	ENSSSCT00000003029;ENSSSCT00000003030	GO:0005923(bicellular tight junction);GO:0006970(response to osmotic stress);GO:0010633(negative regulation of epithelial cell migration);GO:0016020(membrane);GO:0016021(integral component of membrane);GO:0031410(cytoplasmic vesicle);GO:0031435(mitogen-activated protein kinase kinase kinase binding);GO:0045216(cell-cell junction organization);GO:0046329(negative regulation of JNK cascade);GO:0050…	04530(Tight junction);04530(Tight junction)	K21099	NA	MARVEL domain containing 3 [Source:NCBI gene;Acc:100511453]	protein_coding	0.0913722	0.133784	0.0537396	0.150544	0.0931731	0.183292	0.837692	0.0678541	0.242856	0.648586	0.263909	-1.92189	0.00515176	0.298462	down	yes
MSTRG.488	VNN1	ENSSSCT00000004620	GO:0002526(acute inflammatory response);GO:0002544(chronic inflammatory response);GO:0006807(nitrogen compound metabolic process);GO:0006954(inflammatory response);GO:0015939(pantothenate metabolic process);GO:0016811(hydrolase activity, acting on carbon-nitrogen (but not peptide) bonds, in linear amides);GO:0017159(pantetheine hydrolase activity);GO:0033089(positive regulation of T cell differen…	00770(Pantothenate and CoA biosynthesis)	K08069	EC:3.5.1.92	vanin 1 [Source:NCBI gene;Acc:397246]	protein_coding	2.09725	1.01734	2.47162	19.2667	1.80625	2.4507	0.873893	2.30189	0.527268	0.374733	4.08352	2.02981	0.00522852	0.30232	up	yes
MSTRG.10377	SCARA5	ENSSSCT00000010605	GO:0005044(scavenger receptor activity);GO:0005886(plasma membrane);GO:0005887(integral component of plasma membrane);GO:0006811(ion transport);GO:0006879(cellular iron ion homeostasis);GO:0006897(endocytosis);GO:0006898(receptor-mediated endocytosis);GO:0009986(cell surface);GO:0016020(membrane);GO:0016021(integral component of membrane);GO:0034605(cellular response to heat);GO:0034755(iron ion …	NA	NA	NA	scavenger receptor class A member 5 [Source:NCBI gene;Acc:100524281]	protein_coding	1.97304	4.75988	3.02827	3.10375	2.12112	6.49923	2.33195	5.24795	8.78457	12.7073	0.4213	-1.24708	0.00526183	0.303656	down	yes
MSTRG.12368	PLEKHS1	ENSSSCT00000054130;ENSSSCT00000047949	NA	NA	NA	NA	pleckstrin homology domain containing S1 [Source:NCBI gene;Acc:100157918]	protein_coding	0.193257	0.202936	0.391145	0.321531	0.458585	0.626259	1.60723	0.532016	0.197873	1.82685	0.327219	-1.61167	0.00530206	0.305387	down	yes
MSTRG.6913	SMTNL2	ENSSSCT00000019462	GO:0005515(protein binding);GO:0005815(microtubule organizing center);GO:0030036(actin cytoskeleton organization);GO:0031941(filamentous actin)	NA	NA	NA	smoothelin like 2 [Source:NCBI gene;Acc:100523750]	protein_coding	0.486144	0.392386	0.697848	0.401261	0.512206	0.418804	2.73082	0.359198	0.427633	5.38967	0.266975	-1.90522	0.00534738	0.307321	down	yes
MSTRG.27918	ISG15	ENSSSCT00000046783	GO:0005515(protein binding);GO:0005576(extracellular region);GO:0009617(response to bacterium);GO:0019941(modification-dependent protein catabolic process);GO:0030501(positive regulation of bone mineralization);GO:0031386(protein tag);GO:0031397(negative regulation of protein ubiquitination);GO:0032020(ISG15-protein conjugation);GO:0032649(regulation of interferon-gamma production);GO:0034340(res…	04622(RIG-I-like receptor signaling pathway);05165(Human papillomavirus infection);05169(Epstein-Barr virus infection)	K12159	NA	ISG15 ubiquitin-like modifier [Source:NCBI gene;Acc:100145895]	protein_coding	1.44918	1.45477	1.16324	32.186	1.00099	1.47088	1.62465	1.05005	1.74052	1.89791	4.78598	2.25882	0.00553743	0.315589	up	yes
MSTRG.33630	MAPK10	ENSSSCT00000036195;ENSSSCT00000033080;ENSSSCT00000010107	GO:0000165(MAPK cascade);GO:0000166(nucleotide binding);GO:0004672(protein kinase activity);GO:0004674(protein serine/threonine kinase activity);GO:0004705(JUN kinase activity);GO:0004707(MAP kinase activity);GO:0005524(ATP binding);GO:0005634(nucleus);GO:0005737(cytoplasm);GO:0006468(protein phosphorylation);GO:0007254(JNK cascade);GO:0007258(JUN phosphorylation);GO:0010468(regulation of gene ex…	01522(Endocrine resistance);04010(MAPK signaling pathway);04012(ErbB signaling pathway);04014(Ras signaling pathway);04024(cAMP signaling pathway);04068(FoxO signaling pathway);04071(Sphingolipid signaling pathway);04137(Mitophagy - animal);04140(Autophagy - animal);04141(Protein processing in endoplasmic reticulum);04210(Apoptosis);04215(Apoptosis - multiple species);04217(Necroptosis);04310(Wnt…	K04440	EC:2.7.11.24	mitogen-activated protein kinase 10 [Source:NCBI gene;Acc:100521736]	protein_coding	0.903352	1.51421	1.36654	1.44927	1.15753	1.65912	2.33672	1.40104	3.13334	5.20847	0.465176	-1.10415	0.00557458	0.315589	down	yes
ENSSSCG00000002029	MYH7	ENSSSCT00000035069;ENSSSCT00000056252;ENSSSCT00000039377;ENSSSCT00000035771;ENSSSCT00000047799;ENSSSCT00000002271;ENSSSCT00000036352	GO:0000146(microfilament motor activity);GO:0000166(nucleotide binding);GO:0001701(in utero embryonic development);GO:0001725(stress fiber);GO:0002026(regulation of the force of heart contraction);GO:0002027(regulation of heart rate);GO:0003774(motor activity);GO:0003779(actin binding);GO:0005515(protein binding);GO:0005516(calmodulin binding);GO:0005524(ATP binding);GO:0005737(cytoplasm);GO:0006…	04260(Cardiac muscle contraction);04261(Adrenergic signaling in cardiomyocytes);05416(Viral myocarditis);05416(Viral myocarditis)	K17751	NA	myosin heavy chain 7 [Source:NCBI gene;Acc:396860]	protein_coding	0.0885826	0.0646067	0.0507976	0.0407473	0.105396	0.455707	0.105838	0.179014	0.148413	0.136372	0.341476	-1.55014	0.00564129	0.317231	down	yes
MSTRG.8325	BHLHE40	ENSSSCT00000056298	GO:0000122(negative regulation of transcription by RNA polymerase II);GO:0000978(RNA polymerase II proximal promoter sequence-specific DNA binding);GO:0000980(RNA polymerase II distal enhancer sequence-specific DNA binding);GO:0000981(DNA-binding transcription factor activity, RNA polymerase II-specific);GO:0001102(RNA polymerase II activating transcription factor binding);GO:0001227(DNA-binding …	04710(Circadian rhythm)	K03729	NA	basic helix-loop-helix family member e40 [Source:NCBI gene;Acc:100514873]	protein_coding	5.18779	2.30378	6.48771	5.50025	6.94965	2.71858	3.99617	1.76806	1.54741	2.55607	2.09984	1.07028	0.00564725	0.317231	up	yes
MSTRG.1662	SPINT1	ENSSSCT00000005258;ENSSSCT00000052253	GO:0001843(neural tube closure);GO:0001892(embryonic placenta development);GO:0004867(serine-type endopeptidase inhibitor activity);GO:0005515(protein binding);GO:0005886(plasma membrane);GO:0010951(negative regulation of endopeptidase activity);GO:0016020(membrane);GO:0016021(integral component of membrane);GO:0030198(extracellular matrix organization);GO:0060670(branching involved in labyrinthi…	05202(Transcriptional misregulation in cancer);05215(Prostate cancer);05215(Prostate cancer)	K15619	NA	serine peptidase inhibitor, Kunitz type 1 [Source:NCBI gene;Acc:100157387]	protein_coding	0.235365	0.22761	0.677416	0.718639	0.45196	0.69778	3.38	0.168895	0.460129	4.31634	0.256118	-1.96512	0.00564748	0.317231	down	yes
MSTRG.35319	ARHGEF5	ENSSSCT00000025725	GO:0002408(myeloid dendritic cell chemotaxis);GO:0005085(guanyl-nucleotide exchange factor activity);GO:0005089(Rho guanyl-nucleotide exchange factor activity);GO:0005515(protein binding);GO:0005634(nucleus);GO:0005654(nucleoplasm);GO:0005737(cytoplasm);GO:0005829(cytosol);GO:0005886(plasma membrane);GO:0030036(actin cytoskeleton organization);GO:0032956(regulation of actin cytoskeleton organizat…	NA	K20684	NA	Rho guanine nucleotide exchange factor 5 [Source:NCBI gene;Acc:100627158]	protein_coding	0.100586	0.102588	0.218082	0.1737	0.158588	0.282904	0.751252	0.02595	0.23127	1.81176	0.242833	-2.04196	0.00571166	0.318505	down	yes
MSTRG.1484	SLC27A2	ENSSSCT00000005128	GO:0000038(very long-chain fatty acid metabolic process);GO:0001561(fatty acid alpha-oxidation);GO:0001676(long-chain fatty acid metabolic process);GO:0003824(catalytic activity);GO:0004467(long-chain fatty acid-CoA ligase activity);GO:0005102(signaling receptor binding);GO:0005324(long-chain fatty acid transporter activity);GO:0005777(peroxisome);GO:0005778(peroxisomal membrane);GO:0005779(integ…	03320(PPAR signaling pathway);04146(Peroxisome);04931(Insulin resistance)	K08746	6.2.1.3;EC:6.2.1.-	solute carrier family 27 member 2 [Source:NCBI gene;Acc:494011]	protein_coding	0.046434	0.022013	0.006746	0.0001	0.046999	0.012388	0.293257	0.025169	0.140858	0.325233	0.153459	-2.70408	0.00577713	0.320876	down	yes
MSTRG.24854	KRT7	ENSSSCT00000058869;ENSSSCT00000039279	GO:0005198(structural molecule activity);GO:0005737(cytoplasm);GO:0005882(intermediate filament);GO:0045095(keratin filament);GO:0045095(keratin filament)	NA	NA	NA	keratin 7 [Source:HGNC Symbol;Acc:HGNC:6445]	protein_coding	0.518701	0.368629	0.678766	1.21303	0.31168	1.01273	6.2142	0.0115072	0.333613	11.8862	0.158843	-2.65433	0.00582342	0.321229	down	yes
MSTRG.10685	B3GNT4	ENSSSCT00000030522	GO:0000139(Golgi membrane);GO:0005783(endoplasmic reticulum);GO:0005794(Golgi apparatus);GO:0006486(protein glycosylation);GO:0008376(acetylgalactosaminyltransferase activity);GO:0008378(galactosyltransferase activity);GO:0008532(N-acetyllactosaminide beta-1,3-N-acetylglucosaminyltransferase activity);GO:0016020(membrane);GO:0016021(integral component of membrane);GO:0016740(transferase activity)…	00601(Glycosphingolipid biosynthesis - lacto and neolacto series)	K07971	EC:2.4.1.149	UDP-GlcNAc:betaGal beta-1,3-N-acetylglucosaminyltransferase 4 [Source:NCBI gene;Acc:100736645]	protein_coding	0.333425	1.08702	1.18315	0.591466	0.68939	1.10997	3.88635	0.426664	0.718627	9.96135	0.241225	-2.05155	0.00599	0.327285	down	yes
MSTRG.32927	CXCL10	ENSSSCT00000062500	GO:0005125(cytokine activity);GO:0005576(extracellular region);GO:0005615(extracellular space);GO:0006935(chemotaxis);GO:0006952(defense response);GO:0006955(immune response);GO:0007186(G protein-coupled receptor signaling pathway);GO:0007189(adenylate cyclase-activating G protein-coupled receptor signaling pathway);GO:0008009(chemokine activity);GO:0008201(heparin binding);GO:0009617(response to…	04060(Cytokine-cytokine receptor interaction);04062(Chemokine signaling pathway);04620(Toll-like receptor signaling pathway);04622(RIG-I-like receptor signaling pathway);04623(Cytosolic DNA-sensing pathway);04657(IL-17 signaling pathway);04668(TNF signaling pathway);05160(Hepatitis C);05164(Influenza A);05169(Epstein-Barr virus infection)	K12671	NA	C-X-C motif chemokine ligand 10 [Source:NCBI gene;Acc:494019]	protein_coding	0.281036	0.339104	0.807022	18.3288	0.218493	0.295043	1.45653	0.344939	0.254603	0.527269	6.93948	2.79483	0.0060203	0.327738	up	yes
MSTRG.10518	DDX60	ENSSSCT00000065233;ENSSSCT00000010657;ENSSSCT00000039842;ENSSSCT00000061116;ENSSSCT00000041121;ENSSSCT00000049404;ENSSSCT00000047342	GO:0003676(nucleic acid binding);GO:0003690(double-stranded DNA binding);GO:0003723(RNA binding);GO:0003725(double-stranded RNA binding);GO:0003727(single-stranded RNA binding);GO:0005524(ATP binding);GO:0005737(cytoplasm);GO:0005829(cytosol);GO:0009615(response to virus);GO:0045111(intermediate filament cytoskeleton);GO:0051607(defense response to virus);GO:1900245(positive regulation of MDA-5 s…	NA	K20103	EC:3.6.4.13	DExD/H-box helicase 60 [Source:NCBI gene;Acc:100158037]	protein_coding	0.592383	0.543826	0.558792	9.54915	0.557076	0.45887	0.924184	0.371874	0.364321	0.761606	4.09643	2.03437	0.00610399	0.330481	up	yes
MSTRG.34387	C11orf88	ENSSSCT00000016385	NA	NA	NA	NA	chromosome 9 C11orf88 homolog [Source:NCBI gene;Acc:100513750]	protein_coding	0.160931	0.018433	0.084218	0.033833	0.036845	0.0001	1.59272	0.0001	0.102915	2.64353	0.0770297	-3.69844	0.00616036	0.332325	down	yes
MSTRG.30984	WDR93	ENSSSCT00000002069	GO:0005515(protein binding);GO:0005747(mitochondrial respiratory chain complex I);GO:0008137(NADH dehydrogenase (ubiquinone) activity);GO:0016651(oxidoreductase activity, acting on NAD(P)H);GO:0022900(electron transport chain)	NA	NA	NA	WD repeat domain 93 [Source:NCBI gene;Acc:100156276]	protein_coding	0.047666	0.144425	0.23034	0.230693	0.048044	0.249004	0.871342	0.186829	0.189534	1.25987	0.254361	-1.97505	0.0061961	0.333046	down	yes
ENSSSCG00000004028	C6orf118	ENSSSCT00000004454	NA	NA	NA	NA	chromosome 6 open reading frame 118 [Source:HGNC Symbol;Acc:HGNC:21233]	protein_coding	0.0001	0.091364	0.070269	0.132187	0.032421	0.0001	1.7489	0.0001	0.13422	2.80918	0.0695451	-3.84591	0.0063249	0.338746	down	yes
MSTRG.28450	UBXN11;CRYBG2	ENSSSCT00000047126;ENSSSCT00000059711;ENSSSCT00000055692;ENSSSCT00000023711;ENSSSCT00000064299;ENSSSCT00000055926;ENSSSCT00000060577;ENSSSCT00000061813;ENSSSCT00000038385;ENSSSCT00000063507;ENSSSCT00000060727;ENSSSCT00000042807	GO:0043130(ubiquitin binding);GO:0043161(proteasome-mediated ubiquitin-dependent protein catabolic process);GO:0043161(proteasome-mediated ubiquitin-dependent protein catabolic process)	NA	NA	NA	UBX domain protein 11 [Source:NCBI gene;Acc:100621938];crystallin beta-gamma domain containing 2 [Source:NCBI gene;Acc:110261120]	protein_coding	0.244746	0.25302	0.278861	0.319427	0.227031	0.189835	1.30221	0.196918	0.393029	2.06462	0.319076	-1.64803	0.00648464	0.344206	down	yes
MSTRG.25631	SCNN1A	ENSSSCT00000040390;ENSSSCT00000041896;ENSSSCT00000000769;ENSSSCT00000044695	GO:0005272(sodium channel activity);GO:0005737(cytoplasm);GO:0005887(integral component of plasma membrane);GO:0006811(ion transport);GO:0006814(sodium ion transport);GO:0015280(ligand-gated sodium channel activity);GO:0016020(membrane);GO:0016021(integral component of membrane);GO:0016324(apical plasma membrane);GO:0031514(motile cilium);GO:0034706(sodium channel complex);GO:0035725(sodium ion t…	04742(Taste transduction);04960(Aldosterone-regulated sodium reabsorption);04960(Aldosterone-regulated sodium reabsorption)	K04824	NA	sodium channel epithelial 1 alpha subunit [Source:NCBI gene;Acc:396608]	protein_coding	0.100579	0.11491	0.17804	0.265239	0.140856	0.187558	1.63315	0.0895883	0.125113	1.12671	0.252876	-1.9835	0.0065702	0.346651	down	yes
MSTRG.23234	NKAIN3	ENSSSCT00000050194;ENSSSCT00000056004	GO:0016020(membrane);GO:0016021(integral component of membrane);GO:0016021(integral component of membrane)	NA	K22735	NA	sodium/potassium transporting ATPase interacting 3 [Source:NCBI gene;Acc:100157871]	protein_coding	4.72714	3.17847	2.16697	1.72114	1.89145	1.21129	1.88268	1.55073	1.29677	0.544525	2.10996	1.07721	0.00658891	0.346651	up	yes
MSTRG.11843	ZFAND4	ENSSSCT00000011386	GO:0005515(protein binding);GO:0008270(zinc ion binding);GO:0046872(metal ion binding)	NA	K12163	NA	zinc finger AN1-type containing 4 [Source:NCBI gene;Acc:100152192]	protein_coding	0.405869	0.289708	0.235265	0.419011	0.428709	0.648123	1.88724	0.520366	0.584013	1.06315	0.378185	-1.40284	0.00663954	0.347309	down	yes
MSTRG.7745	FAM240A	ENSSSCT00000037017	NA	NA	NA	NA	family with sequence similarity 240 member A [Source:NCBI gene;Acc:106505592]	protein_coding	0.0001	0.0001	0.142609	0.002843	0.0001	0.0001	0.959276	0.088527	0.041746	1.29319	0.0611674	-4.03109	0.00664808	0.347309	down	yes
MSTRG.8932	SERPINI2	ENSSSCT00000012848	GO:0004867(serine-type endopeptidase inhibitor activity);GO:0005615(extracellular space);GO:0010951(negative regulation of endopeptidase activity)	NA	NA	NA	serpin family I member 2 [Source:NCBI gene;Acc:100516831]	protein_coding	0.0001	0.0001	0.092134	0.0001	0.0001	0.0001	1.74226	0.0001	0.0001	4.20236	0.0155652	-6.00553	0.00668675	0.348434	down	yes
MSTRG.17185	LRRC56	ENSSSCT00000052417;ENSSSCT00000026132;ENSSSCT00000061601;ENSSSCT00000043711	GO:0005515(protein binding);GO:0005515(protein binding)	NA	NA	NA	leucine rich repeat containing 56 [Source:NCBI gene;Acc:100514944]	protein_coding	0.287063	0.190462	0.162131	0.11291	0.0513253	0.258336	0.565897	0.266235	0.254101	1.38168	0.294871	-1.76184	0.00677476	0.352075	down	yes
MSTRG.2964	PLPPR1	ENSSSCT00000049737;ENSSSCT00000005936;ENSSSCT00000047466	GO:0005654(nucleoplasm);GO:0005887(integral component of plasma membrane);GO:0006644(phospholipid metabolic process);GO:0007399(nervous system development);GO:0008195(phosphatidate phosphatase activity);GO:0016020(membrane);GO:0016021(integral component of membrane);GO:0016791(phosphatase activity);GO:0042577(lipid phosphatase activity);GO:0046839(phospholipid dephosphorylation);GO:0046839(phosph…	NA	K19581	NA	phospholipid phosphatase related 1 [Source:NCBI gene;Acc:100154648]	protein_coding	0.0001	0.0722425	0.067845	0.0259227	0.023854	0.0226954	0.480502	0.0234815	0.094348	0.581391	0.157985	-2.66214	0.00680266	0.352909	down	yes
MSTRG.13175	PURG	ENSSSCT00000037526;ENSSSCT00000063060;ENSSSCT00000050935;ENSSSCT00000037315	NA	NA	K21800	NA	purine rich element binding protein G [Source:NCBI gene;Acc:100621194]	protein_coding	0.676244	0.559704	0.654625	0.468941	0.464587	2.46106	2.78398	0.630265	0.73223	0.559841	0.394022	-1.34365	0.00712035	0.366834	down	yes
MSTRG.10623	RFLNA	ENSSSCT00000060787	GO:0031005(filamin binding);GO:0032432(actin filament bundle);GO:0048705(skeletal system morphogenesis);GO:0061181(regulation of chondrocyte development);GO:0061182(negative regulation of chondrocyte development);GO:0061572(actin filament bundle organization);GO:1900158(negative regulation of bone mineralization involved in bone maturation)	NA	NA	NA	refilin A [Source:NCBI gene;Acc:100158166]	protein_coding	2.25093	0.53439	0.698368	13.5081	0.610649	0.528885	1.58464	0.395007	0.996633	0.540881	4.35053	2.12119	0.00728765	0.373142	up	yes
ENSSSCG00000015907	GALNT3	ENSSSCT00000061318;ENSSSCT00000017320	GO:0000139(Golgi membrane);GO:0004653(polypeptide N-acetylgalactosaminyltransferase activity);GO:0005509(calcium ion binding);GO:0005794(Golgi apparatus);GO:0006486(protein glycosylation);GO:0016020(membrane);GO:0016021(integral component of membrane);GO:0016740(transferase activity);GO:0016757(transferase activity, transferring glycosyl groups);GO:0018242(protein O-linked glycosylation via serin…	00512(Mucin type O-glycan biosynthesis);00512(Mucin type O-glycan biosynthesis)	K00710	EC:2.4.1.41	polypeptide N-acetylgalactosaminyltransferase 3 [Source:NCBI gene;Acc:100515629]	protein_coding	0.0001	0.188209	0.0331307	0.211639	0.0640141	0.243997	1.25255	0.0301232	0.0194442	2.60248	0.119822	-3.06103	0.0072962	0.373142	down	yes
ENSSSCG00000006336	CCDC190	ENSSSCT00000006944;ENSSSCT00000037295	NA	NA	NA	NA	coiled-coil domain containing 190 [Source:NCBI gene;Acc:100156626]	protein_coding	0.0001	0.0652746	0.0292358	0.0001	0.0262437	0.0001	1.10751	0.0001	0.065008	1.15849	0.0518849	-4.26854	0.00730546	0.373142	down	yes
MSTRG.11097	ENSSSCG00000038719;ENSSSCG00000037214	ENSSSCT00000046494;ENSSSCT00000051926;ENSSSCT00000046315;ENSSSCT00000052364;ENSSSCT00000054873;ENSSSCT00000061992;ENSSSCT00000041578;ENSSSCT00000042990;ENSSSCT00000039982;ENSSSCT00000061983;ENSSSCT00000053766;ENSSSCT00000043436;ENSSSCT00000060377;ENSSSCT00000057664;ENSSSCT00000045917;ENSSSCT00000033546;ENSSSCT00000063237;ENSSSCT00000036351;ENSSSCT00000057501;ENSSSCT00000034850	GO:0002377(immunoglobulin production);GO:0005615(extracellular space);GO:0006955(immune response);GO:0006955(immune response)	NA	NA	NA		protein_coding	0.0314637	0.00845869	0.143285	0.648805	0.0735565	0.328254	2.94597	0.170145	0.0690438	1.83184	0.169416	-2.56136	0.00736456	0.374875	down	yes
MSTRG.31872	SAMD15	ENSSSCT00000002668;ENSSSCT00000066212	GO:0005515(protein binding);GO:0005515(protein binding)	NA	NA	NA	sterile alpha motif domain containing 15 [Source:NCBI gene;Acc:100152746]	protein_coding	0.5107	0.347734	0.511661	0.239043	0.374142	0.348324	1.98357	0.483912	0.498204	3.02899	0.312672	-1.67728	0.00742162	0.375852	down	yes
MSTRG.13088	ENSSSCG00000015795	ENSSSCT00000061583;ENSSSCT00000017198;ENSSSCT00000025197	NA	NA	NA	NA	coiled-coil domain containing 110 [Source:NCBI gene;Acc:100517861]	protein_coding	0.0600092	0.197817	0.209652	0.149864	0.246907	0.350727	1.11014	0.224922	0.145859	0.866686	0.32029	-1.64255	0.00756315	0.379386	down	yes
MSTRG.17534	PPP1R32	ENSSSCT00000014299	GO:0019902(phosphatase binding)	NA	K17571	NA	protein phosphatase 1 regulatory subunit 32 [Source:NCBI gene;Acc:100521178]	protein_coding	0.015815	0.0001	0.113056	0.0469171	0.0001	0.0001	1.19318	0.036467	0.0001	2.3157	0.0496365	-4.33245	0.00756784	0.379386	down	yes
ENSSSCG00000036059	HSPB3	ENSSSCT00000057169	GO:0005634(nucleus);GO:0005737(cytoplasm)	NA	K09544	NA	heat shock protein family B (small) member 3 [Source:NCBI gene;Acc:100519061]	protein_coding	0.155384	0.058654	0.038275	0.085169	0.140615	0.696898	0.116349	0.486952	0.255613	0.148985	0.280442	-1.83422	0.00760742	0.380729	down	yes
MSTRG.32227	CPZ	ENSSSCT00000037066	GO:0004181(metallocarboxypeptidase activity);GO:0005515(protein binding);GO:0006508(proteolysis);GO:0008270(zinc ion binding)	NA	K13022	EC:3.4.17.-	carboxypeptidase Z [Source:NCBI gene;Acc:110262047]	protein_coding	2.02738	3.29248	1.465	5.59983	3.9904	1.31764	1.06733	0.889038	1.47548	2.26897	2.33315	1.22228	0.00764322	0.381253	up	yes
ENSSSCG00000001040	C6orf52	ENSSSCT00000001134	NA	NA	NA	NA	chromosome 7 C6orf52 homolog [Source:NCBI gene;Acc:100270682]	protein_coding	0.012765	0.065806	0.085161	0.053451	0.101211	0.124594	0.444049	0.079757	0.046042	0.652644	0.236358	-2.08096	0.00764349	0.381253	down	yes
MSTRG.12028	FFAR4	ENSSSCT00000011466;ENSSSCT00000054114	GO:0004930(G protein-coupled receptor activity);GO:0005504(fatty acid binding);GO:0005886(plasma membrane);GO:0005887(integral component of plasma membrane);GO:0007186(G protein-coupled receptor signaling pathway);GO:0008527(taste receptor activity);GO:0010827(regulation of glucose transmembrane transport);GO:0016020(membrane);GO:0016021(integral component of membrane);GO:0030139(endocytic vesicl…	NA	K08425	NA	phosphodiesterase 6C [Source:NCBI gene;Acc:100135678]	protein_coding	0.0001	0.0723598	0.0001	0.0001	0.0257488	0.0271482	0.570662	0.0001	0.0242818	0.846497	0.0670044	-3.8996	0.00768328	0.381647	down	yes
MSTRG.33639	ENSSSCG00000035084	ENSSSCT00000054847;ENSSSCT00000040570;ENSSSCT00000057706;ENSSSCT00000042785	GO:0000785(chromatin);GO:0005634(nucleus);GO:0016020(membrane);GO:0016021(integral component of membrane);GO:0031492(nucleosomal DNA binding);GO:0031492(nucleosomal DNA binding)	NA	NA	NA		protein_coding	0.409569	0.862741	0.810353	0.755384	0.686286	0.950024	1.33329	0.760291	1.74676	2.83566	0.462145	-1.11358	0.00771533	0.382275	down	yes
MSTRG.30567	MDGA1	ENSSSCT00000001762	GO:0005515(protein binding);GO:0016020(membrane);GO:0046658(anchored component of plasma membrane);GO:0098982(GABA-ergic synapse);GO:0099179(regulation of synaptic membrane adhesion);GO:1905606(regulation of presynapse assembly)	NA	NA	NA	MAM domain containing glycosylphosphatidylinositol anchor 1 [Source:NCBI gene;Acc:397529]	protein_coding	4.3735	4.9928	1.57897	2.0126	10.8176	1.82968	1.07707	1.61387	3.56633	1.99842	2.35742	1.23721	0.00779071	0.38458	up	yes
MSTRG.19003	SV2C	ENSSSCT00000054670;ENSSSCT00000048115	GO:0005215(transporter activity);GO:0007268(chemical synaptic transmission);GO:0008021(synaptic vesicle);GO:0016020(membrane);GO:0016021(integral component of membrane);GO:0022857(transmembrane transporter activity);GO:0055085(transmembrane transport);GO:0055085(transmembrane transport)	NA	NA	NA	synaptic vesicle glycoprotein 2C [Source:NCBI gene;Acc:100517268]	protein_coding	1.11215	1.33682	0.241107	1.29301	0.842354	0.930747	8.09548	2.78231	1.68932	1.37801	0.324381	-1.62424	0.00781352	0.38458	down	yes
MSTRG.29532	GLIS1	ENSSSCT00000004258	GO:0000122(negative regulation of transcription by RNA polymerase II);GO:0000977(RNA polymerase II regulatory region sequence-specific DNA binding);GO:0001227(DNA-binding transcription repressor activity, RNA polymerase II-specific);GO:0001228(DNA-binding transcription activator activity, RNA polymerase II-specific);GO:0001649(osteoblast differentiation);GO:0003676(nucleic acid binding);GO:000367…	NA	K09232	NA	GLIS family zinc finger 1 [Source:NCBI gene;Acc:100515552]	protein_coding	0.121967	0.078206	1.70368	0.543608	0.364225	0.046321	0.041641	0.342045	0.090407	0.087905	4.62205	2.20853	0.00785271	0.385236	up	yes
MSTRG.24380	WDR63	ENSSSCT00000050119;ENSSSCT00000064526;ENSSSCT00000051239;ENSSSCT00000007615;ENSSSCT00000051500;ENSSSCT00000062030	GO:0005515(protein binding);GO:0007018(microtubule-based movement);GO:0008574(ATP-dependent microtubule motor activity, plus-end-directed);GO:0030286(dynein complex);GO:0045503(dynein light chain binding);GO:0045504(dynein heavy chain binding);GO:0045504(dynein heavy chain binding)	NA	NA	NA	WD repeat domain 63 [Source:NCBI gene;Acc:100157444]	protein_coding	0.708664	1.82111	0.750826	0.721133	0.590811	1.65563	4.24061	0.926052	1.35539	2.955	0.412529	-1.27743	0.00793375	0.388571	down	yes
MSTRG.25558	CLEC2B	ENSSSCT00000035827	GO:0016020(membrane);GO:0016021(integral component of membrane);GO:0030246(carbohydrate binding)	05167(Kaposi sarcoma-associated herpesvirus infection)	K10071	NA	C-type lectin domain family 2, member B [Source:NCBI gene;Acc:100520839]	protein_coding	2.03246	1.47329	3.3491	2.03019	2.00675	1.49606	1.25981	1.18428	0.816968	0.651731	2.0137	1.00985	0.00796384	0.389404	up	yes
MSTRG.23266	CYP7A1	ENSSSCT00000060847;ENSSSCT00000037500;ENSSSCT00000064570;ENSSSCT00000006836	GO:0004497(monooxygenase activity);GO:0005506(iron ion binding);GO:0005623(cell);GO:0005783(endoplasmic reticulum);GO:0005789(endoplasmic reticulum membrane);GO:0006699(bile acid biosynthetic process);GO:0006707(cholesterol catabolic process);GO:0008123(cholesterol 7-alpha-monooxygenase activity);GO:0016020(membrane);GO:0016491(oxidoreductase activity);GO:0016705(oxidoreductase activity, acting o…	00120(Primary bile acid biosynthesis);00140(Steroid hormone biosynthesis);03320(PPAR signaling pathway);04976(Bile secretion);04979(Cholesterol metabolism);04979(Cholesterol metabolism)	K00489	EC:1.14.14.23	cytochrome P450, family 7, subfamily A, polypeptide 1 [Source:NCBI gene;Acc:448985]	protein_coding	0.0314045	0.0128445	0.646652	0.218707	0.0370375	0.0631895	0.0304889	0.0001	0.0380372	0.00400449	6.96984	2.80113	0.00806528	0.392431	up	yes
MSTRG.12857	GPR39	ENSSSCT00000017107	GO:0004930(G protein-coupled receptor activity);GO:0007165(signal transduction);GO:0007186(G protein-coupled receptor signaling pathway);GO:0016020(membrane);GO:0016021(integral component of membrane)	NA	NA	NA	G protein-coupled receptor 39 [Source:HGNC Symbol;Acc:HGNC:4496]	protein_coding	0.128411	0.08383	0.288287	0.244129	0.281171	0.551399	0.870765	0.119984	0.610186	1.50795	0.280259	-1.83517	0.0082119	0.396879	down	yes
MSTRG.18249	ENSSSCG00000013902	ENSSSCT00000015188	GO:0016020(membrane);GO:0016021(integral component of membrane)	NA	NA	NA	PLASMODESMATA CALLOSE-BINDING PROTEIN 4-like [Source:NCBI gene;Acc:100736865]	protein_coding	0.0001	0.0001	0.0001	0.0001	0.117646	0.0001	1.55198	0.0001	0.0001	3.94185	0.0214859	-5.54047	0.00832592	0.399886	down	yes
MSTRG.15111	CMBL	ENSSSCT00000055010	GO:0016787(hydrolase activity)	NA	NA	NA	carboxymethylenebutenolidase homolog [Source:NCBI gene;Acc:100625451]	protein_coding	1.77864	1.31662	1.82413	2.0722	1.20523	3.4335	2.60925	3.7414	2.77699	3.92463	0.497206	-1.00809	0.00841809	0.401078	down	yes
MSTRG.16723	CFTR	ENSSSCT00000063008;ENSSSCT00000052754;ENSSSCT00000049128;ENSSSCT00000061025;ENSSSCT00000058046;ENSSSCT00000057257;ENSSSCT00000018101;ENSSSCT00000056142;ENSSSCT00000055376	GO:0000166(nucleotide binding);GO:0005254(chloride channel activity);GO:0005260(intracellularly ATP-gated chloride channel activity);GO:0005524(ATP binding);GO:0005737(cytoplasm);GO:0005769(early endosome);GO:0005789(endoplasmic reticulum membrane);GO:0005829(cytosol);GO:0005886(plasma membrane);GO:0005887(integral component of plasma membrane);GO:0006695(cholesterol biosynthetic process);GO:0006…	02010(ABC transporters);04024(cAMP signaling pathway);04152(AMPK signaling pathway);04530(Tight junction);04971(Gastric acid secretion);04972(Pancreatic secretion);04976(Bile secretion);04976(Bile secretion)	K05031	EC:5.6.1.6	cystic fibrosis transmembrane conductance regulator [Source:NCBI gene;Acc:403154]	protein_coding	0.00888183	0.0236194	0.0874738	0.103717	0.168411	0.0141182	2.26278	0.00716086	0.0185605	0.884627	0.123022	-3.02301	0.00845175	0.401763	down	yes
MSTRG.36748	SH2D1A	ENSSSCT00000013824	GO:0002250(adaptive immune response);GO:0002376(immune system process);GO:0005070(SH3/SH2 adaptor activity);GO:0005737(cytoplasm);GO:0006959(humoral immune response);GO:0006968(cellular defense response);GO:0007267(cell-cell signaling);GO:0009967(positive regulation of signal transduction);GO:0045087(innate immune response);GO:0045954(positive regulation of natural killer cell mediated cytotoxici…	04650(Natural killer cell mediated cytotoxicity)	K07990	NA	SH2 domain containing 1A [Source:NCBI gene;Acc:780420]	protein_coding	0.132301	0.197845	0.300373	0.199945	0.130624	0.710634	0.341956	0.354854	0.4911	0.663957	0.375059	-1.41481	0.00846878	0.401763	down	yes
MSTRG.32195	CFAP99	ENSSSCT00000051364	NA	NA	NA	NA	cilia and flagella associated protein 99 [Source:NCBI gene;Acc:100516278]	protein_coding	0.188061	0.129199	0.1522	0.130506	0.049775	0.14132	0.711622	0.118647	0.271407	0.985282	0.291589	-1.77799	0.00849541	0.401763	down	yes
MSTRG.34943	COL28A1	ENSSSCT00000016715;ENSSSCT00000047673	GO:0004867(serine-type endopeptidase inhibitor activity);GO:0005201(extracellular matrix structural constituent);GO:0005604(basement membrane);GO:0005615(extracellular space);GO:0010951(negative regulation of endopeptidase activity);GO:0030198(extracellular matrix organization);GO:0031012(extracellular matrix);GO:0031012(extracellular matrix)	NA	NA	NA	collagen type XXVIII alpha 1 chain [Source:NCBI gene;Acc:100510974]	protein_coding	0.0800399	0.156826	0.130419	0.073934	0.148818	0.018648	1.80155	0.0398511	0.0441	1.58091	0.169304	-2.56231	0.00850251	0.401763	down	yes
MSTRG.27908	ENSSSCG00000033601	ENSSSCT00000054649	GO:0003676(nucleic acid binding);GO:0005622(intracellular);GO:0006355(regulation of transcription, DNA-templated);GO:0046872(metal ion binding)	05168(Herpes simplex virus 1 infection)	K09228	NA	zinc finger protein 211-like [Source:NCBI gene;Acc:100513362]	protein_coding	2.76126	1.4217	1.59975	1.88857	1.84248	9.40053	3.00416	3.59809	2.0898	2.64996	0.458659	-1.12451	0.0087206	0.40784	down	yes
MSTRG.17357	CST6	ENSSSCT00000014166	GO:0001533(cornified envelope);GO:0004869(cysteine-type endopeptidase inhibitor activity);GO:0008544(epidermis development);GO:0010466(negative regulation of peptidase activity);GO:0010951(negative regulation of endopeptidase activity);GO:0030414(peptidase inhibitor activity)	NA	K13902	NA	cystatin E/M [Source:NCBI gene;Acc:100622572]	protein_coding	0.321656	0.681584	0.235589	0.603655	0.338904	0.657913	3.61412	0.312251	0.232233	4.80251	0.226778	-2.14064	0.00875791	0.40784	down	yes
MSTRG.23178	VXN	ENSSSCT00000032451	GO:0005634(nucleus);GO:0005886(plasma membrane);GO:0022008(neurogenesis);GO:0030182(neuron differentiation)	NA	NA	NA	vexin [Source:NCBI gene;Acc:100525161]	protein_coding	0.127309	0.208012	0.126907	0.351243	0.109855	0.154731	0.109749	0.104016	0.142508	4.81344	0.173413	-2.52772	0.00886569	0.410579	down	yes
MSTRG.27670	MYH14	ENSSSCT00000027619;ENSSSCT00000031995	GO:0000146(microfilament motor activity);GO:0000166(nucleotide binding);GO:0001725(stress fiber);GO:0003009(skeletal muscle contraction);GO:0003774(motor activity);GO:0003779(actin binding);GO:0005515(protein binding);GO:0005524(ATP binding);GO:0005737(cytoplasm);GO:0005903(brush border);GO:0007519(skeletal muscle tissue development);GO:0007605(sensory perception of sound);GO:0016459(myosin compl…	04530(Tight junction);04530(Tight junction)	K10352	NA	myosin heavy chain 14 [Source:NCBI gene;Acc:100524748]	protein_coding	0.427018	0.4442	0.575813	0.716297	0.322544	0.30098	2.89284	0.13887	0.35442	6.35202	0.247618	-2.01381	0.00894324	0.413057	down	yes
MSTRG.26420	DNAAF1	ENSSSCT00000002967	GO:0001947(heart looping);GO:0003341(cilium movement);GO:0003356(regulation of cilium beat frequency);GO:0005515(protein binding);GO:0005829(cytosol);GO:0005886(plasma membrane);GO:0005929(cilium);GO:0005930(axoneme);GO:0016607(nuclear speck);GO:0030324(lung development);GO:0035469(determination of pancreatic left/right asymmetry);GO:0036158(outer dynein arm assembly);GO:0036159(inner dynein arm …	NA	K19750	NA	dynein axonemal assembly factor 1 [Source:NCBI gene;Acc:100517588]	protein_coding	0.42318	0.53815	0.526438	0.494786	0.683725	0.744264	1.86571	0.782471	0.86275	2.3957	0.40089	-1.31872	0.00895635	0.413057	down	yes
MSTRG.433	PERP	ENSSSCT00000051639	GO:0002934(desmosome organization);GO:0005739(mitochondrion);GO:0005794(Golgi apparatus);GO:0005887(integral component of plasma membrane);GO:0007219(Notch signaling pathway);GO:0016020(membrane);GO:0016021(integral component of membrane);GO:0034113(heterotypic cell-cell adhesion);GO:0045862(positive regulation of proteolysis);GO:0072332(intrinsic apoptotic signaling pathway by p53 class mediator…	04115(p53 signaling pathway)	K10136	NA	PERP, TP53 apoptosis effector [Source:NCBI gene;Acc:100513507]	protein_coding	2.1742	4.12087	3.35899	4.52324	2.26155	4.00273	23.5234	2.04447	5.91582	8.81429	0.371074	-1.43022	0.00896081	0.413057	down	yes
MSTRG.9366	ENSSSCG00000011851	ENSSSCT00000057619;ENSSSCT00000012963;ENSSSCT00000038856	GO:0000187(activation of MAPK activity);GO:0048012(hepatocyte growth factor receptor signaling pathway);GO:0048012(hepatocyte growth factor receptor signaling pathway)	NA	K22021	NA	mucin 20, cell surface associated [Source:NCBI gene;Acc:100134954]	protein_coding	0.0225498	0.0167964	0.0443576	0.0512629	0.0171259	0.0305476	0.448876	0.0001	0.0281614	0.491592	0.152203	-2.71594	0.00906191	0.416495	down	yes
MSTRG.35416	AXDND1	ENSSSCT00000016916;ENSSSCT00000053623	NA	NA	NA	NA	axonemal dynein light chain domain containing 1 [Source:NCBI gene;Acc:100627790]	protein_coding	0.597839	0.359917	0.0978756	0.272427	0.167473	0.566914	1.41105	0.401029	0.490133	1.78657	0.321226	-1.63834	0.00906336	0.416495	down	yes
MSTRG.28665	TEKT2	ENSSSCT00000004029	GO:0005815(microtubule organizing center);GO:0030317(flagellated sperm motility);GO:0036126(sperm flagellum);GO:0036159(inner dynein arm assembly);GO:0060271(cilium assembly);GO:0060294(cilium movement involved in cell motility)	NA	K18629	NA	tektin 2 [Source:NCBI gene;Acc:100525228]	protein_coding	0.0001	0.1352	0.097522	0.0001	0.0001	0.0001	2.45618	0.0001	0.079193	3.53132	0.0384088	-4.70242	0.00909807	0.417446	down	yes
MSTRG.20721	ACSM4	ENSSSCT00000027442;ENSSSCT00000053513;ENSSSCT00000041087	GO:0003824(catalytic activity);GO:0003996(acyl-CoA ligase activity);GO:0004321(fatty-acyl-CoA synthase activity);GO:0005759(mitochondrial matrix);GO:0006633(fatty acid biosynthetic process);GO:0006637(acyl-CoA metabolic process);GO:0015645(fatty acid ligase activity);GO:0015645(fatty acid ligase activity)	00650(Butanoate metabolism);00650(Butanoate metabolism)	K01896	EC:6.2.1.2	acyl-CoA synthetase medium-chain family member 4 [Source:NCBI gene;Acc:100512595]	protein_coding	0.390062	0.564985	0.195124	0.475435	0.57159	1.197	2.19596	1.00148	0.81765	0.544141	0.381707	-1.38946	0.00930892	0.425042	down	yes
MSTRG.9937	ADAMTS1	ENSSSCT00000013158	GO:0001542(ovulation from ovarian follicle);GO:0001822(kidney development);GO:0004222(metalloendopeptidase activity);GO:0005604(basement membrane);GO:0006508(proteolysis);GO:0008201(heparin binding);GO:0008237(metallopeptidase activity);GO:0008270(zinc ion binding);GO:0031012(extracellular matrix);GO:0031410(cytoplasmic vesicle);GO:0060347(heart trabecula formation);GO:1900087(positive regulation…	NA	K08617	EC:3.4.24.-	ADAM metallopeptidase with thrombospondin type 1 motif 1 [Source:NCBI gene;Acc:497061]	protein_coding	8.41029	14.5642	14.0407	13.7238	17.3388	7.13008	5.15374	12.8751	5.64305	6.55255	1.82248	0.865903	0.00940697	0.4259	up	no
MSTRG.29393	HOOK1	ENSSSCT00000004235	GO:0003779(actin binding);GO:0005515(protein binding);GO:0005737(cytoplasm);GO:0005813(centrosome);GO:0005829(cytosol);GO:0007030(Golgi organization);GO:0007032(endosome organization);GO:0007040(lysosome organization);GO:0007286(spermatid development);GO:0008017(microtubule binding);GO:0008333(endosome to lysosome transport);GO:0015630(microtubule cytoskeleton);GO:0030705(cytoskeleton-dependent i…	NA	K16612	NA	hook microtubule tethering protein 1 [Source:NCBI gene;Acc:100525467]	protein_coding	0.503658	0.281881	0.199619	0.328282	0.277569	0.636945	2.4851	0.422764	0.369547	0.817285	0.336249	-1.5724	0.00982012	0.439075	down	yes
MSTRG.22708	TNFRSF11B	ENSSSCT00000006589;ENSSSCT00000024145	GO:0005515(protein binding);GO:0005615(extracellular space);GO:0007165(signal transduction);GO:0030198(extracellular matrix organization);GO:0031012(extracellular matrix);GO:0042489(negative regulation of odontogenesis of dentin-containing tooth);GO:0042489(negative regulation of odontogenesis of dentin-containing tooth)	04060(Cytokine-cytokine receptor interaction);04380(Osteoclast differentiation);04380(Osteoclast differentiation)	K05148	NA	TNF receptor superfamily member 11b [Source:NCBI gene;Acc:100049688]	protein_coding	1.85	0.248804	0.461225	0.55626	4.00034	0.476855	0.302908	0.817408	0.259848	0.250904	3.37613	1.75537	0.00987349	0.439942	up	yes
MSTRG.13645	ZSWIM2	ENSSSCT00000017455	GO:0000209(protein polyubiquitination);GO:0004842(ubiquitin-protein transferase activity);GO:0008270(zinc ion binding);GO:0043621(protein self-association);GO:0046872(metal ion binding);GO:0061630(ubiquitin protein ligase activity);GO:1902043(positive regulation of extrinsic apoptotic signaling pathway via death domain receptors)	NA	K15716	EC:2.3.2.27	zinc finger SWIM-type containing 2 [Source:NCBI gene;Acc:100155630]	protein_coding	0.067424	0.023882	0.108207	0.362489	0.081355	0.073107	1.36132	0.110154	0.165361	1.47911	0.201739	-2.30944	0.00988384	0.439942	down	yes
MSTRG.8963	LRRC34	ENSSSCT00000051804;ENSSSCT00000022551	GO:0005515(protein binding);GO:0005515(protein binding)	NA	NA	NA	leucine rich repeat containing 34 [Source:NCBI gene;Acc:100625893]	protein_coding	0.260731	0.420371	0.314358	0.258547	0.413662	0.414598	1.36545	0.413684	0.718092	1.79451	0.354346	-1.49677	0.0100231	0.441674	down	yes
MSTRG.2339	LRRC9	ENSSSCT00000005600;ENSSSCT00000063097	GO:0005515(protein binding);GO:0005515(protein binding)	NA	NA	NA	leucine-rich repeat-containing protein 9 [Source:NCBI gene;Acc:100622535]	protein_coding	0.607874	0.648638	1.17436	0.785859	0.686583	0.989107	2.48372	0.94407	1.40243	2.94718	0.445253	-1.1673	0.0100295	0.441674	down	yes
MSTRG.23160	SULF1	ENSSSCT00000059775;ENSSSCT00000037262;ENSSSCT00000054113;ENSSSCT00000053984;ENSSSCT00000006792	GO:0001502(cartilage condensation);GO:0001822(kidney development);GO:0001937(negative regulation of endothelial cell proliferation);GO:0002063(chondrocyte development);GO:0003094(glomerular filtration);GO:0003824(catalytic activity);GO:0004065(arylsulfatase activity);GO:0005509(calcium ion binding);GO:0005539(glycosaminoglycan binding);GO:0005615(extracellular space);GO:0005783(endoplasmic reticu…	NA	K14607	EC:3.1.6.-	sulfatase 1 [Source:NCBI gene;Acc:100152427]	protein_coding	3.55474	2.06722	4.90257	5.12944	9.55288	2.84579	2.04361	2.7376	2.25467	3.15207	1.93397	0.951567	0.0100407	0.441674	up	no
ENSSSCG00000017495	GRB7	ENSSSCT00000042149;ENSSSCT00000019048	GO:0005070(SH3/SH2 adaptor activity);GO:0005829(cytosol);GO:0005925(focal adhesion);GO:0007165(signal transduction);GO:0009967(positive regulation of signal transduction);GO:0010494(cytoplasmic stress granule);GO:0017148(negative regulation of translation);GO:0019901(protein kinase binding);GO:0030335(positive regulation of cell migration);GO:0034063(stress granule assembly);GO:0035091(phosphatid…	NA	NA	NA	growth factor receptor bound protein 7 [Source:NCBI gene;Acc:100513230]	protein_coding	0.0001	0.0001	0.110777	0.0723913	0.0320606	0.289442	0.793752	0.0001	0.13231	0.830795	0.105272	-3.24781	0.0100414	0.441674	down	yes
MSTRG.20717	ACSM3	ENSSSCT00000008608;ENSSSCT00000050202	GO:0003824(catalytic activity);GO:0003996(acyl-CoA ligase activity);GO:0004321(fatty-acyl-CoA synthase activity);GO:0005759(mitochondrial matrix);GO:0006633(fatty acid biosynthetic process);GO:0006637(acyl-CoA metabolic process);GO:0015645(fatty acid ligase activity);GO:0015645(fatty acid ligase activity)	00650(Butanoate metabolism);00650(Butanoate metabolism)	K01896	EC:6.2.1.2	acyl-CoA synthetase medium chain family member 3 [Source:NCBI gene;Acc:100512220]	protein_coding	0.87862	0.698856	0.940607	1.22667	1.26683	1.40626	5.11981	0.746491	0.930087	4.46111	0.395742	-1.33737	0.0101809	0.446896	down	yes
MSTRG.11333	EGLN1	ENSSSCT00000011138	GO:0001666(response to hypoxia);GO:0005506(iron ion binding);GO:0005737(cytoplasm);GO:0005829(cytosol);GO:0006879(cellular iron ion homeostasis);GO:0008198(ferrous iron binding);GO:0014069(postsynaptic density);GO:0016491(oxidoreductase activity);GO:0016705(oxidoreductase activity, acting on paired donors, with incorporation or reduction of molecular oxygen);GO:0016706(2-oxoglutarate-dependent di…	04066(HIF-1 signaling pathway);05200(Pathways in cancer);05211(Renal cell carcinoma)	K09592	EC:1.14.11.29	egl-9 family hypoxia inducible factor 1 [Source:NCBI gene;Acc:100153461]	protein_coding	1.35122	2.51534	1.38773	1.62777	2.13319	7.62199	1.19173	7.99625	2.28007	2.21554	0.42314	-1.24079	0.0102902	0.449959	down	yes
MSTRG.7619	DLEC1	ENSSSCT00000012316	GO:0005737(cytoplasm);GO:0005829(cytosol);GO:0008285(negative regulation of cell population proliferation)	NA	NA	NA	DLEC1, cilia and flagella associated protein [Source:NCBI gene;Acc:100153766]	protein_coding	0.611948	0.522586	0.828527	0.884768	0.439846	0.521367	2.90078	0.487261	0.714041	5.26162	0.33259	-1.58818	0.0103706	0.452809	down	yes
MSTRG.32563	ATP8A1	ENSSSCT00000044098;ENSSSCT00000009632	GO:0000166(nucleotide binding);GO:0000287(magnesium ion binding);GO:0004012(phospholipid-translocating ATPase activity);GO:0005524(ATP binding);GO:0005783(endoplasmic reticulum);GO:0005794(Golgi apparatus);GO:0005802(trans-Golgi network);GO:0005886(plasma membrane);GO:0007612(learning);GO:0015914(phospholipid transport);GO:0016020(membrane);GO:0016021(integral component of membrane);GO:0030335(po…	NA	K14802	EC:7.6.2.1	ATPase phospholipid transporting 8A1 [Source:NCBI gene;Acc:100515393]	protein_coding	1.99892	2.02573	2.22752	1.50316	1.95513	5.13311	2.8843	4.2489	2.65447	2.95425	0.543242	-0.880332	0.0104211	0.454346	down	no
MSTRG.27618	ENSSSCG00000031086	ENSSSCT00000061205;ENSSSCT00000053394	GO:0005179(hormone activity);GO:0005576(extracellular region);GO:0005615(extracellular space);GO:0005737(cytoplasm);GO:0007186(G protein-coupled receptor signaling pathway);GO:0009755(hormone-mediated signaling pathway);GO:0010469(regulation of signaling receptor activity);GO:0010469(regulation of signaling receptor activity)	04080(Neuroactive ligand-receptor interaction);04912(GnRH signaling pathway);04913(Ovarian steroidogenesis);04917(Prolactin signaling pathway);04917(Prolactin signaling pathway)	K08521	NA	luteinizing hormone beta polypeptide [Source:NCBI gene;Acc:397153]	protein_coding	0.0838001	0.160882	0.15376	0.126037	0.167994	0.0971973	0.754148	0.0658588	0.145036	1.87262	0.235948	-2.08346	0.0104731	0.455948	down	yes
MSTRG.27710	ENSSSCG00000032113	ENSSSCT00000003612;ENSSSCT00000046646;ENSSSCT00000047274;ENSSSCT00000060045;ENSSSCT00000049154;ENSSSCT00000055598;ENSSSCT00000054185;ENSSSCT00000048583;ENSSSCT00000048021;ENSSSCT00000038605	GO:0000064(L-ornithine transmembrane transporter activity);GO:0006865(amino acid transport);GO:0015181(arginine transmembrane transporter activity);GO:0015189(L-lysine transmembrane transporter activity);GO:0016020(membrane);GO:0016021(integral component of membrane);GO:0022857(transmembrane transporter activity);GO:0055085(transmembrane transport);GO:0097638(L-arginine import across plasma membr…	NA	NA	NA	cationic amino acid transporter 3-like [Source:NCBI gene;Acc:100523440]	protein_coding	0.0212539	0.126954	0.120324	0.233969	0.154077	0.47686	0.604979	0.03343	0.30099	0.785129	0.298256	-1.74538	0.0105267	0.456945	down	yes
MSTRG.6237	ENSSSCG00000030269	ENSSSCT00000046908;ENSSSCT00000032589	GO:0016758(transferase activity, transferring hexosyl groups);GO:0030173(integral component of Golgi membrane);GO:0030259(lipid glycosylation);GO:0030259(lipid glycosylation)	NA	NA	NA	beta-1,4 N-acetylgalactosaminyltransferase 2-like [Source:NCBI gene;Acc:110255214]	protein_coding	0.0757566	0.0481971	0.0328734	0.0001	0.379301	0.205909	0.741505	0.0733704	0.325276	1.8619	0.167156	-2.58074	0.0105619	0.457804	down	yes
MSTRG.22321	FAM84A	ENSSSCT00000009481	NA	NA	K22805	NA	family with sequence similarity 84 member A [Source:NCBI gene;Acc:100518964]	protein_coding	1.03834	3.07273	2.34969	1.42457	1.14666	1.90822	8.78082	1.21062	2.65376	10.958	0.354037	-1.49803	0.0106	0.458336	down	yes
MSTRG.1823	TRPM1	ENSSSCT00000061967;ENSSSCT00000005345	GO:0005216(ion channel activity);GO:0005261(cation channel activity);GO:0005262(calcium channel activity);GO:0006811(ion transport);GO:0007165(signal transduction);GO:0007216(G protein-coupled glutamate receptor signaling pathway);GO:0007601(visual perception);GO:0016020(membrane);GO:0016021(integral component of membrane);GO:0034220(ion transmembrane transport);GO:0035841(new growing cell tip);G…	NA	K04976	NA	transient receptor potential cation channel subfamily M member 1 [Source:NCBI gene;Acc:100158130]	protein_coding	0.18306	0.0001	0.484855	0.194489	0.0193732	0.0166729	0.0464604	0.038722	0.0347562	0.0194198	5.65192	2.49874	0.0106402	0.458336	up	yes
MSTRG.14051	SGPP2	ENSSSCT00000023888	GO:0005783(endoplasmic reticulum);GO:0006670(sphingosine metabolic process);GO:0016020(membrane);GO:0016021(integral component of membrane);GO:0016311(dephosphorylation);GO:0042392(sphingosine-1-phosphate phosphatase activity)	00600(Sphingolipid metabolism);04071(Sphingolipid signaling pathway)	K04717	EC:3.1.3.-	sphingosine-1-phosphate phosphatase 2 [Source:NCBI gene;Acc:100524832]	protein_coding	0.362634	0.227191	0.166745	0.486131	0.157245	0.207634	1.4922	0.196214	0.307551	2.57592	0.292905	-1.7715	0.0106642	0.458336	down	yes
MSTRG.26891	TSNAXIP1	ENSSSCT00000003065	GO:0005737(cytoplasm)	NA	NA	NA	translin associated factor X interacting protein 1 [Source:NCBI gene;Acc:100520430]	protein_coding	0.601329	0.341555	0.143918	0.260244	0.299521	0.268942	1.92583	0.264811	0.419773	2.88265	0.285763	-1.80711	0.0106665	0.458336	down	yes
MSTRG.14956	ENSSSCG00000017019	ENSSSCT00000018531	GO:0007165(signal transduction);GO:0016021(integral component of membrane);GO:0048666(neuron development)	NA	NA	NA		protein_coding	1.00264	0.435274	7.18246	2.58104	3.48331	0.794374	0.636261	0.613404	1.58357	0.82695	3.29657	1.72096	0.0107853	0.461443	up	yes
ENSSSCG00000035909	ERICH2	ENSSSCT00000044925	NA	NA	NA	NA	glutamate rich 2 [Source:NCBI gene;Acc:100155783]	protein_coding	0.077284	0.0001	0.042398	0.0001	0.204491	0.155359	0.411483	0.131583	0.211036	1.0362	0.166716	-2.58453	0.011014	0.468534	down	yes
ENSSSCG00000011878	CASR	ENSSSCT00000064997;ENSSSCT00000012993	GO:0004930(G protein-coupled receptor activity);GO:0005509(calcium ion binding);GO:0005513(detection of calcium ion);GO:0005886(plasma membrane);GO:0005887(integral component of plasma membrane);GO:0006874(cellular calcium ion homeostasis);GO:0007165(signal transduction);GO:0007186(G protein-coupled receptor signaling pathway);GO:0010628(positive regulation of gene expression);GO:0016020(membrane…	04621(NOD-like receptor signaling pathway);04928(Parathyroid hormone synthesis, secretion and action);04928(Parathyroid hormone synthesis, secretion and action)	K04612	NA	calcium sensing receptor [Source:NCBI gene;Acc:100520980]	protein_coding	0.619594	0.333406	0.562954	0.699783	0.838013	0.0294908	0.0309111	0.072471	0.559317	0.224278	3.33209	1.73643	0.0110471	0.469272	up	yes
MSTRG.23516	MNDA	ENSSSCT00000062770;ENSSSCT00000007031	GO:0002218(activation of innate immune response);GO:0005654(nucleoplasm);GO:0005730(nucleolus);GO:0006974(cellular response to DNA damage stimulus);GO:0030889(negative regulation of B cell proliferation);GO:0035458(cellular response to interferon-beta);GO:0043065(positive regulation of apoptotic process);GO:0050853(B cell receptor signaling pathway);GO:0050853(B cell receptor signaling pathway)	NA	NA	NA	myeloid cell nuclear differentiation antigen [Source:HGNC Symbol;Acc:HGNC:7183]	protein_coding	0.330482	0.61237	0.394399	1.19022	0.735713	1.21507	0.302195	1.90123	2.78707	2.18348	0.388981	-1.36223	0.0112614	0.473039	down	yes
MSTRG.13941	MREG	ENSSSCT00000017612	GO:0030318(melanocyte differentiation);GO:0030659(cytoplasmic vesicle membrane);GO:0031300(intrinsic component of organelle membrane);GO:0031902(late endosome membrane);GO:0032400(melanosome localization);GO:0032402(melanosome transport);GO:0032991(protein-containing complex);GO:0033162(melanosome membrane);GO:0035091(phosphatidylinositol binding);GO:0042470(melanosome);GO:0043473(pigmentation);G…	NA	NA	NA	melanoregulin [Source:NCBI gene;Acc:100627946]	protein_coding	0.212506	0.32493	0.544379	0.374964	0.161034	0.85528	1.11078	0.567259	0.437586	1.04079	0.403274	-1.31017	0.011269	0.473039	down	yes
MSTRG.11256	ACTN2	ENSSSCT00000061348;ENSSSCT00000011106;ENSSSCT00000023830;ENSSSCT00000037537	GO:0003779(actin binding);GO:0005509(calcium ion binding);GO:0005515(protein binding);GO:0005546(phosphatidylinositol-4,5-bisphosphate binding);GO:0005886(plasma membrane);GO:0005925(focal adhesion);GO:0006936(muscle contraction);GO:0008092(cytoskeletal protein binding);GO:0019904(protein domain specific binding);GO:0030017(sarcomere);GO:0030018(Z disc);GO:0030035(microspike assembly);GO:0030175(…	05412(Arrhythmogenic right ventricular cardiomyopathy (ARVC));05412(Arrhythmogenic right ventricular cardiomyopathy (ARVC))	K21073	NA	actinin alpha 2 [Source:NCBI gene;Acc:100157406]	protein_coding	0.081525	0.190347	0.081124	0.198987	0.0380926	0.114059	0.0461664	0.0911532	0.154328	2.43859	0.207459	-2.2691	0.011277	0.473039	down	yes
MSTRG.10583	TMEM132C	ENSSSCT00000059253;ENSSSCT00000010692	GO:0016020(membrane);GO:0016021(integral component of membrane);GO:0016021(integral component of membrane)	NA	K17599	NA	transmembrane protein 132C [Source:NCBI gene;Acc:100623362]	protein_coding	0.0001	0.010743	0.08205	0.01964	0.016876	0.033037	0.327577	0.052836	0.013577	0.297532	0.178604	-2.48517	0.0113201	0.473039	down	yes
MSTRG.14048	EPHA4;ENSSSCG00000039828	ENSSSCT00000017672;ENSSSCT00000053423	GO:0000166(nucleotide binding);GO:0004672(protein kinase activity);GO:0004713(protein tyrosine kinase activity);GO:0004714(transmembrane receptor protein tyrosine kinase activity);GO:0005003(ephrin receptor activity);GO:0005004(GPI-linked ephrin receptor activity);GO:0005005(transmembrane-ephrin receptor activity);GO:0005515(protein binding);GO:0005524(ATP binding);GO:0005887(integral component o…	04360(Axon guidance)	K05105	EC:2.7.10.1	EPH receptor A4 [Source:NCBI gene;Acc:100188979]	protein_coding	3.74979	2.62646	3.84122	4.64901	3.71991	6.32204	29.5643	4.44582	2.5411	4.82038	0.389703	-1.35955	0.0113365	0.473039	down	yes
MSTRG.9123	PEX5L	ENSSSCT00000012877;ENSSSCT00000040664;ENSSSCT00000047015	GO:0000268(peroxisome targeting sequence binding);GO:0005052(peroxisome matrix targeting signal-1 binding);GO:0005515(protein binding);GO:0005778(peroxisomal membrane);GO:0005829(cytosol);GO:0016560(protein import into peroxisome matrix, docking);GO:0031267(small GTPase binding);GO:0043235(receptor complex);GO:0043235(receptor complex)	04146(Peroxisome);04146(Peroxisome)	K13342	NA	peroxisomal biogenesis factor 5 like [Source:NCBI gene;Acc:100524828]	protein_coding	0.848474	0.412922	0.314117	0.26452	0.419676	1.43568	3.87149	0.58401	0.41311	0.385824	0.337768	-1.56589	0.0113997	0.474106	down	yes
MSTRG.8888	MLF1	ENSSSCT00000044162	GO:0007050(cell cycle arrest);GO:0019904(protein domain specific binding)	05202(Transcriptional misregulation in cancer)	K15622	NA	myeloid leukemia factor 1 [Source:NCBI gene;Acc:100620289]	protein_coding	0.816872	1.47123	0.940053	1.03771	0.906199	1.43541	3.46231	1.19376	0.968685	5.35909	0.416456	-1.26377	0.0115513	0.477743	down	yes
ENSSSCG00000027558	GABBR2	ENSSSCT00000025444	GO:0004930(G protein-coupled receptor activity);GO:0004965(G protein-coupled GABA receptor activity);GO:0005737(cytoplasm);GO:0005886(plasma membrane);GO:0005887(integral component of plasma membrane);GO:0007165(signal transduction);GO:0007186(G protein-coupled receptor signaling pathway);GO:0007214(gamma-aminobutyric acid signaling pathway);GO:0016020(membrane);GO:0016021(integral component of m…	04024(cAMP signaling pathway);04080(Neuroactive ligand-receptor interaction);04727(GABAergic synapse);04742(Taste transduction);04915(Estrogen signaling pathway);05032(Morphine addiction)	K04615	NA	gamma-aminobutyric acid type B receptor subunit 2 [Source:NCBI gene;Acc:100511175]	protein_coding	0.071148	0.096587	0.244687	0.107033	0.111085	0.175601	0.155073	0.25381	0.29299	1.0169	0.33285	-1.58706	0.0117199	0.482703	down	yes
MSTRG.13460	LRP2;ABCB11	ENSSSCT00000039755;ENSSSCT00000054482;ENSSSCT00000057475;ENSSSCT00000051964;ENSSSCT00000064653;ENSSSCT00000060051;ENSSSCT00000053855;ENSSSCT00000061921;ENSSSCT00000017342;ENSSSCT00000061421;ENSSSCT00000049245;ENSSSCT00000065751;ENSSSCT00000047664;ENSSSCT00000017343	GO:0001843(neural tube closure);GO:0003139(secondary heart field specification);GO:0003148(outflow tract septum morphogenesis);GO:0003223(ventricular compact myocardium morphogenesis);GO:0003281(ventricular septum development);GO:0005509(calcium ion binding);GO:0005515(protein binding);GO:0005768(endosome);GO:0005783(endoplasmic reticulum);GO:0005794(Golgi apparatus);GO:0005903(brush border);GO:0…	04340(Hedgehog signaling pathway);04918(Thyroid hormone synthesis);04979(Cholesterol metabolism);01522(Endocrine resistance);02010(ABC transporters);04976(Bile secretion);04979(Cholesterol metabolism)	K06233;K05664	NA	LDL receptor related protein 2 [Source:NCBI gene;Acc:100519689];ATP binding cassette subfamily B member 11 [Source:NCBI gene;Acc:100518154]	protein_coding	0.106892	0.218847	0.670006	0.418047	0.153844	0.501038	1.31815	0.108404	0.325358	2.87932	0.305446	-1.71101	0.0118739	0.4877	down	yes
ENSSSCG00000014137	HAPLN1	ENSSSCT00000060841;ENSSSCT00000015441	GO:0001501(skeletal system development);GO:0005540(hyaluronic acid binding);GO:0007155(cell adhesion);GO:0007417(central nervous system development);GO:0031012(extracellular matrix);GO:0045202(synapse);GO:0045202(synapse)	NA	K06848	NA	hyaluronan and proteoglycan link protein 1 [Source:NCBI gene;Acc:445513]	protein_coding	0.468221	1.20621	0.168177	0.557439	0.124797	0.26004	0.1196	0.16302	0.248021	0.0921464	2.85995	1.51599	0.0119259	0.488753	up	yes
MSTRG.24392	ENSSSCG00000000983	ENSSSCT00000001073	GO:0019221(cytokine-mediated signaling pathway);GO:0030368(interleukin-17 receptor activity)	NA	NA	NA	interleukin 17 receptor E like [Source:NCBI gene;Acc:100520842]	protein_coding	0.015286	0.004659	0.107598	0.011712	0.009948	0.0001	0.268498	0.031956	0.010146	1.02006	0.112119	-3.1569	0.0119324	0.488753	down	yes
MSTRG.33540	HERC5;ENSSSCG00000032030	ENSSSCT00000030140;ENSSSCT00000043896;ENSSSCT00000039441	GO:0004842(ubiquitin-protein transferase activity);GO:0016567(protein ubiquitination);GO:0016740(transferase activity);GO:0032020(ISG15-protein conjugation);GO:0042296(ISG15 transferase activity);GO:0050688(regulation of defense response to virus);GO:0050688(regulation of defense response to virus)	NA	K22372	EC:2.3.2.-	HECT and RLD domain containing E3 ubiquitin protein ligase 5 [Source:NCBI gene;Acc:100518083]	protein_coding	1.43212	1.7207	1.29056	14.0495	1.62818	1.22827	1.49037	1.30006	1.07989	2.07335	2.80553	1.48827	0.0121059	0.493728	up	yes
MSTRG.30795	ENSSSCG00000023467	ENSSSCT00000037390;ENSSSCT00000024099	GO:0004364(glutathione transferase activity);GO:0005515(protein binding);GO:0005515(protein binding)	00480(Glutathione metabolism);00980(Metabolism of xenobiotics by cytochrome P450);00982(Drug metabolism - cytochrome P450);00983(Drug metabolism - other enzymes);01524(Platinum drug resistance);05200(Pathways in cancer);05204(Chemical carcinogenesis);05225(Hepatocellular carcinoma);05418(Fluid shear stress and atherosclerosis);05418(Fluid shear stress and atherosclerosis)	K00799	EC:2.5.1.18	glutathione S-transferase A4 [Source:NCBI gene;Acc:100510917]	protein_coding	0.231093	0.249919	0.305897	0.299326	0.408222	1.35081	0.389811	0.235577	0.385	1.61362	0.375982	-1.41126	0.012135	0.493728	down	yes
MSTRG.22140	FOSL2	ENSSSCT00000049214	GO:0000977(RNA polymerase II regulatory region sequence-specific DNA binding);GO:0001228(DNA-binding transcription activator activity, RNA polymerase II-specific);GO:0003334(keratinocyte development);GO:0003677(DNA binding);GO:0003682(chromatin binding);GO:0003700(DNA-binding transcription factor activity);GO:0005634(nucleus);GO:0005654(nucleoplasm);GO:0006355(regulation of transcription, DNA-tem…	04380(Osteoclast differentiation)	K09030	NA	FOS like 2, AP-1 transcription factor subunit [Source:NCBI gene;Acc:100623777]	protein_coding	20.6505	11.5875	10.4492	23.6493	7.55371	10.0126	10.5096	7.42322	5.18796	4.8944	1.94306	0.95833	0.0122515	0.495686	up	no
ENSSSCG00000012549	RADX	ENSSSCT00000013721;ENSSSCT00000060670	GO:0003697(single-stranded DNA binding);GO:0005657(replication fork);GO:2000042(negative regulation of double-strand break repair via homologous recombination);GO:2000042(negative regulation of double-strand break repair via homologous recombination)	NA	NA	NA	RPA1 related single stranded DNA binding protein, X-linked [Source:NCBI gene;Acc:100627173]	protein_coding	0.0001	0.032533	0.027736	0.034927	0.01395	0.076765	0.13894	0.0001	0.043368	0.476995	0.148398	-2.75245	0.0123713	0.499176	down	yes
MSTRG.17865	DCDC1;ENSSSCG00000013324	ENSSSCT00000014553;ENSSSCT00000014551	GO:0035556(intracellular signal transduction);GO:0016020(membrane);GO:0016021(integral component of membrane);GO:0035556(intracellular signal transduction)	NA	NA	NA	uncharacterized LOC100517025 [Source:NCBI gene;Acc:100517025]	protein_coding	0.606897	0.42662	0.509224	0.375066	0.424069	0.417616	1.80794	0.340472	0.421317	4.0137	0.334503	-1.57991	0.012405	0.499859	down	yes
MSTRG.843	ENSSSCG00000031023	ENSSSCT00000036499	GO:0007155(cell adhesion);GO:0031362(anchored component of external side of plasma membrane)	NA	NA	NA		protein_coding	6.35448	3.7613	4.32073	16.6426	4.89921	24.2575	61.9925	11.2537	6.12073	3.5525	0.335691	-1.57479	0.0124397	0.50058	down	yes
MSTRG.29541	LRP8	ENSSSCT00000039265;ENSSSCT00000057960;ENSSSCT00000039248;ENSSSCT00000004260;ENSSSCT00000046680;ENSSSCT00000046538;ENSSSCT00000044937;ENSSSCT00000038531	GO:0005509(calcium ion binding);GO:0005515(protein binding);GO:0005901(caveola);GO:0006897(endocytosis);GO:0006898(receptor-mediated endocytosis);GO:0016020(membrane);GO:0016021(integral component of membrane);GO:0030229(very-low-density lipoprotein particle receptor activity);GO:0043235(receptor complex);GO:0043235(receptor complex)	NA	K20052	NA	LDL receptor related protein 8 [Source:NCBI gene;Acc:100187577]	protein_coding	27.5832	3.79916	1.31861	6.05015	4.32145	1.5752	5.81648	2.62159	3.49051	1.09211	2.95101	1.56121	0.0128043	0.510257	up	yes
MSTRG.24016	INKA2	ENSSSCT00000050110	GO:0005634(nucleus);GO:0019901(protein kinase binding);GO:0030291(protein serine/threonine kinase inhibitor activity);GO:0071901(negative regulation of protein serine/threonine kinase activity)	NA	NA	NA	inka box actin regulator 2 [Source:NCBI gene;Acc:100153198]	protein_coding	0.302303	0.400641	0.507966	0.534246	0.535701	0.261414	0.81979	0.509862	0.401372	5.81778	0.292035	-1.77579	0.0128702	0.510997	down	yes
MSTRG.7681	ENSSSCG00000011291	ENSSSCT00000043588;ENSSSCT00000012361	NA	NA	NA	NA		protein_coding	0.47571	0.144091	0.158541	0.222296	0.0507436	0.0994859	1.94101	0.0589033	0.186511	2.3405	0.227257	-2.13761	0.0129673	0.512807	down	yes
ENSSSCG00000004894	SERPINB5	ENSSSCT00000005400	GO:0002009(morphogenesis of an epithelium);GO:0004867(serine-type endopeptidase inhibitor activity);GO:0005615(extracellular space);GO:0005737(cytoplasm);GO:0010951(negative regulation of endopeptidase activity);GO:0030198(extracellular matrix organization);GO:0050678(regulation of epithelial cell proliferation);GO:0060512(prostate gland morphogenesis)	04115(p53 signaling pathway);05206(MicroRNAs in cancer)	K10139	NA	serpin family B member 5 [Source:NCBI gene;Acc:100155836]	protein_coding	0.0001	0.01316	0.0001	0.092545	0.028198	0.029836	0.654571	0.0001	0.0001	1.4846	0.0618212	-4.01575	0.0131494	0.518626	down	yes
MSTRG.11693	KCNMA1	ENSSSCT00000058903;ENSSSCT00000056413;ENSSSCT00000036820;ENSSSCT00000011303;ENSSSCT00000054031;ENSSSCT00000042465	GO:0001666(response to hypoxia);GO:0003779(actin binding);GO:0005216(ion channel activity);GO:0005244(voltage-gated ion channel activity);GO:0005249(voltage-gated potassium channel activity);GO:0005267(potassium channel activity);GO:0005515(protein binding);GO:0005886(plasma membrane);GO:0005901(caveola);GO:0006811(ion transport);GO:0006813(potassium ion transport);GO:0006970(response to osmotic …	04022(cGMP-PKG signaling pathway);04270(Vascular smooth muscle contraction);04911(Insulin secretion);04924(Renin secretion);04970(Salivary secretion);04972(Pancreatic secretion);04972(Pancreatic secretion)	K04936	NA	potassium calcium-activated channel subfamily M alpha 1 [Source:NCBI gene;Acc:397434]	protein_coding	4.41847	3.74122	9.1977	2.86401	6.21476	1.71655	0.484083	1.41054	1.44375	5.99877	2.39162	1.25799	0.0133461	0.52292	up	yes
MSTRG.24991	HSD17B6	ENSSSCT00000023141;ENSSSCT00000058887	GO:0016491(oxidoreductase activity);GO:0055114(oxidation-reduction process);GO:0055114(oxidation-reduction process)	00140(Steroid hormone biosynthesis);00830(Retinol metabolism);00830(Retinol metabolism)	K13369	1.1.1.105;1.1.1.239;EC:1.1.1.62	17-beta-hydroxysteroid dehydrogenase type 6 [Source:NCBI gene;Acc:100620470]	protein_coding	0.454877	0.286914	0.046479	0.175791	0.477369	3.30903	0.0001	1.74058	0.727476	1.5355	0.197114	-2.3429	0.013637	0.532217	down	yes
MSTRG.23831	CHD1L	ENSSSCT00000007340;ENSSSCT00000050787	GO:0000166(nucleotide binding);GO:0004003(ATP-dependent DNA helicase activity);GO:0005524(ATP binding);GO:0005634(nucleus);GO:0005654(nucleoplasm);GO:0005829(cytosol);GO:0005886(plasma membrane);GO:0006281(DNA repair);GO:0006338(chromatin remodeling);GO:0006974(cellular response to DNA damage stimulus);GO:0016887(ATPase activity);GO:0032508(DNA duplex unwinding);GO:0032508(DNA duplex unwinding)	NA	K20092	EC:3.6.4.12	chromodomain helicase DNA binding protein 1 like [Source:NCBI gene;Acc:100154153]	protein_coding	19.6337	2.75788	2.22857	3.79494	2.48653	2.33921	2.18762	2.96427	3.27457	2.02001	2.41689	1.27315	0.0136839	0.532928	up	yes
MSTRG.30970	CFAP100	ENSSSCT00000060241;ENSSSCT00000063639;ENSSSCT00000002046	NA	NA	NA	NA	cilia and flagella associated protein 100 [Source:NCBI gene;Acc:100155072]	protein_coding	0.43263	0.314328	0.223488	0.60609	0.221415	0.129557	1.99132	0.181863	0.196367	4.78808	0.246728	-2.01901	0.013724	0.533515	down	yes
MSTRG.16888	PDE1C	ENSSSCT00000054189;ENSSSCT00000039072;ENSSSCT00000018148;ENSSSCT00000018147	GO:0004114(3',5'-cyclic-nucleotide phosphodiesterase activity);GO:0005929(cilium);GO:0007165(signal transduction);GO:0007608(sensory perception of smell);GO:0008081(phosphoric diester hydrolase activity);GO:0016787(hydrolase activity);GO:0043025(neuronal cell body);GO:0046872(metal ion binding);GO:0048101(calcium- and calmodulin-regulated 3',5'-cyclic-GMP phosphodiesterase activity);GO:0048101(ca…	00230(Purine metabolism);04020(Calcium signaling pathway);04740(Olfactory transduction);04742(Taste transduction);04924(Renin secretion);05032(Morphine addiction);05032(Morphine addiction)	K13755	EC:3.1.4.17	phosphodiesterase 1C [Source:NCBI gene;Acc:102161696]	protein_coding	0.374021	0.215687	1.20959	0.914048	2.05817	0.323773	0.58435	0.318543	0.27117	0.288632	2.67092	1.41734	0.0137993	0.53438	up	yes
MSTRG.24504	ENSSSCG00000000028	ENSSSCT00000000029	GO:0005509(calcium ion binding);GO:0005654(nucleoplasm)	NA	NA	NA		protein_coding	0.456093	0.290713	0.571499	0.499554	0.159098	0.59607	1.44727	0.379437	0.439512	2.7217	0.35404	-1.49801	0.013853	0.535477	down	yes
MSTRG.2725	ALDH1A1	ENSSSCT00000050861;ENSSSCT00000027607	GO:0004029(aldehyde dehydrogenase (NAD) activity);GO:0005829(cytosol);GO:0016491(oxidoreductase activity);GO:0016620(oxidoreductase activity, acting on the aldehyde or oxo group of donors, NAD or NADP as acceptor);GO:0018479(benzaldehyde dehydrogenase (NAD+) activity);GO:0055114(oxidation-reduction process);GO:0055114(oxidation-reduction process)	00830(Retinol metabolism);00830(Retinol metabolism)	K07249	EC:1.2.1.36	aldehyde dehydrogenase 1 family member A1 [Source:NCBI gene;Acc:100517137]	protein_coding	0.245135	0.345008	0.819883	1.68604	0.347187	0.2861	5.59102	0.248465	0.766913	6.11088	0.264797	-1.91704	0.0138644	0.535477	down	yes
MSTRG.2949	NR4A3	ENSSSCT00000050140;ENSSSCT00000005925;ENSSSCT00000005926	GO:0000122(negative regulation of transcription by RNA polymerase II);GO:0000977(RNA polymerase II regulatory region sequence-specific DNA binding);GO:0000978(RNA polymerase II proximal promoter sequence-specific DNA binding);GO:0001223(transcription coactivator binding);GO:0001228(DNA-binding transcription activator activity, RNA polymerase II-specific);GO:0001707(mesoderm formation);GO:0003677(…	05202(Transcriptional misregulation in cancer);05202(Transcriptional misregulation in cancer)	K08559	NA	nuclear receptor subfamily 4 group A member 3 [Source:NCBI gene;Acc:397479]	protein_coding	0.100199	3.51596	1.62939	1.82544	2.17658	0.229113	0.34336	0.224672	0.508611	1.71702	3.05929	1.6132	0.0140609	0.540266	up	yes
MSTRG.3577	SPATA17	ENSSSCT00000063307;ENSSSCT00000042419;ENSSSCT00000026746;ENSSSCT00000050305;ENSSSCT00000058023	GO:0005515(protein binding);GO:0005515(protein binding)	NA	NA	NA	spermatogenesis associated 17 [Source:NCBI gene;Acc:100415922]	protein_coding	0.392931	0.233547	0.227555	0.171475	0.305441	0.27963	0.882475	0.323449	0.326485	1.55431	0.395368	-1.33873	0.0140798	0.540293	down	yes
MSTRG.1021	LCA5	ENSSSCT00000004936;ENSSSCT00000065390;ENSSSCT00000060067	GO:0005929(cilium);GO:0005930(axoneme);GO:0032391(photoreceptor connecting cilium);GO:0042073(intraciliary transport);GO:0044877(protein-containing complex binding);GO:0044877(protein-containing complex binding)	NA	NA	NA	LCA5, lebercilin [Source:NCBI gene;Acc:100152810]	protein_coding	1.28296	0.44144	0.624796	0.247229	0.729625	0.995439	2.16421	1.08247	1.14566	2.53411	0.419856	-1.25203	0.0143215	0.547057	down	yes
MSTRG.4474	ARMC3	ENSSSCT00000041827;ENSSSCT00000012124;ENSSSCT00000047163	GO:0005515(protein binding);GO:0005515(protein binding)	NA	NA	NA	armadillo repeat containing 3 [Source:NCBI gene;Acc:100519618]	protein_coding	0.0206294	0.350802	0.0173674	0.00791542	0.113995	0.115786	0.814902	0.204873	0.181532	0.992728	0.221103	-2.17721	0.0143589	0.547475	down	yes
MSTRG.6566	ENSSSCG00000032552	ENSSSCT00000041104;ENSSSCT00000027235;ENSSSCT00000047688;ENSSSCT00000042860;ENSSSCT00000065635	GO:0046872(metal ion binding);GO:0046872(metal ion binding)	NA	K20804	EC:2.3.2.31	ring finger and FYVE like domain containing E3 ubiquitin protein ligase [Source:NCBI gene;Acc:100627054]	protein_coding	1.98294	2.17524	1.75036	1.81563	1.62772	4.20628	2.97755	2.91805	3.50885	2.53021	0.57939	-0.787392	0.0145406	0.552212	down	no
MSTRG.32041	C14orf132	ENSSSCT00000048034	GO:0016020(membrane);GO:0016021(integral component of membrane)	NA	NA	NA	chromosome 7 C14orf132 homolog [Source:NCBI gene;Acc:100154278]	protein_coding	0.298254	0.243133	0.897194	0.712819	0.420829	2.70688	0.456201	0.780816	0.119867	4.38058	0.30461	-1.71497	0.0145422	0.552212	down	yes
MSTRG.13950	IGFBP5	ENSSSCT00000032259;ENSSSCT00000065101	GO:0001558(regulation of cell growth);GO:0001649(osteoblast differentiation);GO:0001968(fibronectin binding);GO:0005520(insulin-like growth factor binding);GO:0005576(extracellular region);GO:0006006(glucose metabolic process);GO:0007565(female pregnancy);GO:0010906(regulation of glucose metabolic process);GO:0014912(negative regulation of smooth muscle cell migration);GO:0017148(negative regulat…	NA	NA	NA	insulin like growth factor binding protein 5 [Source:NCBI gene;Acc:397182]	protein_coding	11.557	36.9955	227.532	85.688	62.7057	5.29397	49.4079	6.12868	27.3379	46.0355	3.16293	1.66126	0.0146556	0.553827	up	yes
MSTRG.22759	PKHD1L1	ENSSSCT00000006612;ENSSSCT00000044930	GO:0005929(cilium);GO:0016020(membrane);GO:0016021(integral component of membrane);GO:0016021(integral component of membrane)	NA	NA	NA	PKHD1 like 1 [Source:NCBI gene;Acc:100525460]	protein_coding	0.637443	1.18487	1.23591	2.29433	1.64035	0.96698	6.3656	1.49653	0.909806	8.92903	0.374595	-1.4166	0.0147271	0.55516	down	yes
MSTRG.1189	MRO	ENSSSCT00000004993;ENSSSCT00000058510;ENSSSCT00000046590	NA	NA	NA	NA	maestro [Source:NCBI gene;Acc:100156956]	protein_coding	4.61201	0.0104065	0.062672	8.21539	0.0319373	0.0412833	0.717324	0.0001	0.0325051	0.0001	16.343	4.0306	0.0148267	0.558166	up	yes
MSTRG.26838	ENSSSCG00000002825	ENSSSCT00000060761;ENSSSCT00000040792;ENSSSCT00000003125;ENSSSCT00000003126	GO:0004771(sterol esterase activity);GO:0004806(triglyceride lipase activity);GO:0005615(extracellular space);GO:0016042(lipid catabolic process);GO:0016787(hydrolase activity);GO:0052689(carboxylic ester hydrolase activity);GO:0052689(carboxylic ester hydrolase activity)	00983(Drug metabolism - other enzymes);00983(Drug metabolism - other enzymes)	K01044	EC:3.1.1.1	carboxylesterase 1 [Source:NCBI gene;Acc:397478]	protein_coding	0.362121	0.843793	0.389693	0.118662	0.0620245	0.143313	2.95175	0.119856	0.700511	3.42908	0.241853	-2.0478	0.0151804	0.569321	down	yes
MSTRG.400	HIVEP2	ENSSSCT00000004573;ENSSSCT00000056296;ENSSSCT00000054067	GO:0003676(nucleic acid binding);GO:0005654(nucleoplasm);GO:0005654(nucleoplasm)	NA	K09239	NA	human immunodeficiency virus type I enhancer binding protein 2 [Source:NCBI gene;Acc:100525369]	protein_coding	2.36938	1.06872	3.36976	2.66772	3.58674	1.28653	1.41289	2.04777	0.83239	1.50311	1.84426	0.883042	0.0152006	0.569363	up	no
MSTRG.22385	CMPK2	ENSSSCT00000009460	GO:0004127(cytidylate kinase activity);GO:0004550(nucleoside diphosphate kinase activity);GO:0005739(mitochondrion);GO:0006165(nucleoside diphosphate phosphorylation);GO:0009142(nucleoside triphosphate biosynthetic process);GO:0033862(UMP kinase activity);GO:0046940(nucleoside monophosphate phosphorylation);GO:0050145(nucleoside monophosphate kinase activity);GO:0071222(cellular response to lipop…	00240(Pyrimidine metabolism)	K13809	EC:2.7.4.14	cytidine/uridine monophosphate kinase 2 [Source:NCBI gene;Acc:100623872]	protein_coding	1.81184	1.21611	1.22151	12.4315	1.48533	1.0616	1.56799	0.844365	0.659581	2.07776	2.92472	1.5483	0.0155763	0.578271	up	yes
MSTRG.11964	IFIT1	ENSSSCT00000035268;ENSSSCT00000055224;ENSSSCT00000034495;ENSSSCT00000011439;ENSSSCT00000011438	GO:0005515(protein binding);GO:0005737(cytoplasm);GO:0005739(mitochondrion);GO:0005829(cytosol);GO:0008285(negative regulation of cell population proliferation);GO:0009615(response to virus);GO:0035457(cellular response to interferon-alpha);GO:0042802(identical protein binding);GO:0043066(negative regulation of apoptotic process);GO:0051607(defense response to virus);GO:0051607(defense response t…	05160(Hepatitis C);05160(Hepatitis C)	K14217	NA	interferon-induced protein with tetratricopeptide repeats 1 [Source:NCBI gene;Acc:100153038]	protein_coding	1.34256	1.4545	2.93113	18.9796	1.96911	1.77627	2.45572	1.63253	1.27005	2.33092	2.81834	1.49485	0.0155938	0.578271	up	yes
MSTRG.5198	EPSTI1	ENSSSCT00000065032	NA	NA	NA	NA	epithelial stromal interaction 1 [Source:NCBI gene;Acc:100625050]	protein_coding	1.31267	1.55029	1.58768	10.9312	2.16401	1.11154	1.06386	1.77849	1.04592	1.58593	2.66422	1.41371	0.0156867	0.580669	up	yes
ENSSSCG00000026360	CLGN	ENSSSCT00000025519	GO:0005509(calcium ion binding);GO:0005515(protein binding);GO:0005635(nuclear envelope);GO:0005783(endoplasmic reticulum);GO:0006457(protein folding);GO:0007338(single fertilization);GO:0007339(binding of sperm to zona pellucida);GO:0016020(membrane);GO:0016021(integral component of membrane);GO:0044183(protein folding chaperone);GO:0051082(unfolded protein binding);GO:0065003(protein-containing…	NA	K09551	NA	calmegin [Source:NCBI gene;Acc:100624991]	protein_coding	0.117208	0.066542	0.025456	0.057607	0.155298	0.222772	0.274949	0.078917	0.137264	0.635568	0.312798	-1.6767	0.0156975	0.580669	down	yes
MSTRG.32888	ENSSSCG00000023426	ENSSSCT00000060739;ENSSSCT00000064895;ENSSSCT00000026155;ENSSSCT00000009805	GO:0005615(extracellular space);GO:0005615(extracellular space)	NA	NA	NA	alpha-fetoprotein-like [Source:NCBI gene;Acc:102166306]	protein_coding	0.133956	0.12218	0.197848	0.165993	0.150402	0.211016	0.545986	0.249684	0.214123	0.573757	0.429284	-1.21999	0.0157169	0.580669	down	yes
MSTRG.15109	TNIP1	ENSSSCT00000047704;ENSSSCT00000065125;ENSSSCT00000064689;ENSSSCT00000054874;ENSSSCT00000037697;ENSSSCT00000039989;ENSSSCT00000018608;ENSSSCT00000018609;ENSSSCT00000060583	GO:0002755(MyD88-dependent toll-like receptor signaling pathway);GO:0005654(nucleoplasm);GO:0005829(cytosol);GO:0007159(leukocyte cell-cell adhesion);GO:0009101(glycoprotein biosynthetic process);GO:0042802(identical protein binding);GO:0043124(negative regulation of I-kappaB kinase/NF-kappaB signaling);GO:0050727(regulation of inflammatory response);GO:0051019(mitogen-activated protein kinase bi…	NA	NA	NA	TNFAIP3 interacting protein 1 [Source:NCBI gene;Acc:100271903]	protein_coding	5.28722	3.42551	4.9509	3.68487	4.57774	4.07121	45.7056	4.3721	3.94818	3.7134	0.354733	-1.49519	0.0158568	0.58511	down	yes
MSTRG.33383	DKK2	ENSSSCT00000058233	GO:0005576(extracellular region);GO:0005615(extracellular space);GO:0007275(multicellular organism development);GO:0030178(negative regulation of Wnt signaling pathway);GO:0039706(co-receptor binding);GO:0090090(negative regulation of canonical Wnt signaling pathway);GO:0090263(positive regulation of canonical Wnt signaling pathway)	04310(Wnt signaling pathway)	K02165	NA	dickkopf WNT signaling pathway inhibitor 2 [Source:NCBI gene;Acc:100519672]	protein_coding	43.8925	4.34695	1.05326	2.37983	1.39688	1.71167	2.20057	2.33099	2.27424	6.07407	3.637	1.86275	0.0159804	0.588214	up	yes
MSTRG.29793	KCNQ4	ENSSSCT00000004397	GO:0005216(ion channel activity);GO:0005249(voltage-gated potassium channel activity);GO:0005251(delayed rectifier potassium channel activity);GO:0005267(potassium channel activity);GO:0005516(calmodulin binding);GO:0006811(ion transport);GO:0006813(potassium ion transport);GO:0007605(sensory perception of sound);GO:0008076(voltage-gated potassium channel complex);GO:0016020(membrane);GO:0016021(…	04725(Cholinergic synapse)	K04929	NA	potassium voltage-gated channel subfamily Q member 4 [Source:NCBI gene;Acc:100526228]	protein_coding	0.374271	0.414739	0.761905	0.395439	0.591086	0.431151	1.2769	0.775295	0.443407	4.52534	0.3405	-1.55427	0.0164054	0.600146	down	yes
MSTRG.21279	ST6GAL2	ENSSSCT00000008918	GO:0003824(catalytic activity);GO:0003835(beta-galactoside alpha-2,6-sialyltransferase activity);GO:0005794(Golgi apparatus);GO:0005975(carbohydrate metabolic process);GO:0006486(protein glycosylation);GO:0008373(sialyltransferase activity);GO:0009311(oligosaccharide metabolic process);GO:0016020(membrane);GO:0016021(integral component of membrane);GO:0016740(transferase activity);GO:0016757(tran…	00510(N-Glycan biosynthesis);00514(Other types of O-glycan biosynthesis)	K00779	EC:2.4.99.1	ST6 beta-galactoside alpha-2,6-sialyltransferase 2 [Source:NCBI gene;Acc:100512775]	protein_coding	0.307571	0.198194	0.206077	0.41273	0.180006	0.26462	0.871685	0.160888	0.679061	2.03051	0.325594	-1.61886	0.0164927	0.600879	down	yes
MSTRG.36333	GJB1	ENSSSCT00000035255;ENSSSCT00000013552;ENSSSCT00000032791	GO:0005737(cytoplasm);GO:0005886(plasma membrane);GO:0005921(gap junction);GO:0005922(connexin complex);GO:0007154(cell communication);GO:0016020(membrane);GO:0016021(integral component of membrane);GO:0030054(cell junction);GO:0042803(protein homodimerization activity);GO:0042803(protein homodimerization activity)	NA	K07620	NA	gap junction protein beta 1 [Source:NCBI gene;Acc:100519581]	protein_coding	0.0152717	0.0001	0.0448654	0.0001	0.0417819	0.0001	1.05962	0.0001	0.0001	0.698356	0.058079	-4.10584	0.0165127	0.600879	down	yes
ENSSSCG00000009231	CDS1	ENSSSCT00000051786;ENSSSCT00000010110;ENSSSCT00000058827	GO:0004605(phosphatidate cytidylyltransferase activity);GO:0005783(endoplasmic reticulum);GO:0005789(endoplasmic reticulum membrane);GO:0006629(lipid metabolic process);GO:0006661(phosphatidylinositol biosynthetic process);GO:0008654(phospholipid biosynthetic process);GO:0016020(membrane);GO:0016021(integral component of membrane);GO:0016024(CDP-diacylglycerol biosynthetic process);GO:0016740(tra…	00564(Glycerophospholipid metabolism);04070(Phosphatidylinositol signaling system);04070(Phosphatidylinositol signaling system)	K00981	EC:2.7.7.41	CDP-diacylglycerol synthase 1 [Source:NCBI gene;Acc:733582]	protein_coding	0.426547	0.101196	0.48411	0.465579	0.185267	1.13307	1.98182	0.451199	0.164183	0.940578	0.355973	-1.49016	0.0168015	0.607824	down	yes
MSTRG.33395	ARHGEF38	ENSSSCT00000030948;ENSSSCT00000025328	GO:0005089(Rho guanyl-nucleotide exchange factor activity);GO:0005515(protein binding);GO:0005737(cytoplasm);GO:0035023(regulation of Rho protein signal transduction);GO:0035023(regulation of Rho protein signal transduction)	NA	K20711	NA	Rho guanine nucleotide exchange factor 38 [Source:NCBI gene;Acc:100738766]	protein_coding	0.320321	0.482765	0.365567	0.440598	0.0569382	0.57274	1.28784	0.526015	0.658204	1.17397	0.394947	-1.34027	0.0169059	0.609473	down	yes
MSTRG.1070	COL12A1;ENSSSCG00000034949	ENSSSCT00000004955;ENSSSCT00000041079	GO:0005515(protein binding);GO:0005595(collagen type XII trimer);GO:0030199(collagen fibril organization);GO:0035987(endodermal cell differentiation);GO:0062023(collagen-containing extracellular matrix)	04974(Protein digestion and absorption)	K08132	NA	collagen type XII alpha 1 chain [Source:NCBI gene;Acc:100156689]	protein_coding	29.714	58.556	54.3272	53.2288	65.2993	39.0395	12.0089	28.8489	34.3759	33.9814	1.76133	0.816666	0.0170425	0.612734	up	no
MSTRG.10029	RUNX1	ENSSSCT00000044458;ENSSSCT00000042414;ENSSSCT00000013183	GO:0000977(RNA polymerase II regulatory region sequence-specific DNA binding);GO:0000978(RNA polymerase II proximal promoter sequence-specific DNA binding);GO:0000981(DNA-binding transcription factor activity, RNA polymerase II-specific);GO:0001228(DNA-binding transcription activator activity, RNA polymerase II-specific);GO:0003677(DNA binding);GO:0003700(DNA-binding transcription factor activity…	04530(Tight junction);04659(Th17 cell differentiation);05200(Pathways in cancer);05202(Transcriptional misregulation in cancer);05220(Chronic myeloid leukemia);05221(Acute myeloid leukemia);05221(Acute myeloid leukemia)	K08367	NA	runt related transcription factor 1 [Source:NCBI gene;Acc:100512633]	protein_coding	4.73222	3.58919	4.47542	4.12837	5.34954	3.79003	2.558	2.23089	2.86038	2.14438	1.63982	0.713534	0.0170581	0.612734	up	no
MSTRG.36919	ENSSSCG00000037520	ENSSSCT00000055372	GO:0003676(nucleic acid binding)	05168(Herpes simplex virus 1 infection)	K09228	NA	zinc finger protein 275 [Source:NCBI gene;Acc:106507056]	protein_coding	20.5014	3.89348	2.59683	6.83384	3.60025	0.758257	4.4418	3.91578	3.80532	2.37173	2.44727	1.29117	0.0171215	0.613233	up	yes
MSTRG.4776	SACS	ENSSSCT00000058730;ENSSSCT00000041028;ENSSSCT00000042692;ENSSSCT00000056312	GO:0005515(protein binding);GO:0005634(nucleus);GO:0005737(cytoplasm);GO:0005739(mitochondrion);GO:0030544(Hsp70 protein binding);GO:0051087(chaperone binding);GO:0070628(proteasome binding);GO:0090084(negative regulation of inclusion body assembly);GO:0090084(negative regulation of inclusion body assembly)	NA	K17592	NA	sacsin molecular chaperone [Source:NCBI gene;Acc:100624042]	protein_coding	0.378012	0.393608	4.02693	0.399361	4.22602	0.380805	1.45389	0.402611	0.396964	0.364128	3.14299	1.65214	0.0172946	0.616026	up	yes
MSTRG.30786	EFHC1	ENSSSCT00000049511;ENSSSCT00000002907;ENSSSCT00000064259	GO:0000281(mitotic cytokinesis);GO:0000922(spindle pole);GO:0005509(calcium ion binding);GO:0005813(centrosome);GO:0007052(mitotic spindle organization);GO:0021795(cerebral cortex cell migration);GO:0043014(alpha-tubulin binding);GO:0051302(regulation of cell division);GO:0072686(mitotic spindle);GO:0072686(mitotic spindle)	NA	K23029	NA	EF-hand domain containing 1 [Source:NCBI gene;Acc:100152550]	protein_coding	2.12442	2.1842	1.58121	2.025	1.94628	1.64858	6.45978	1.85495	2.58111	9.71212	0.443066	-1.17441	0.0175396	0.621041	down	yes
MSTRG.25014	RDH16;SDR9C7	ENSSSCT00000038718;ENSSSCT00000062640;ENSSSCT00000056102;ENSSSCT00000000453;ENSSSCT00000000449;ENSSSCT00000064443;ENSSSCT00000000448;ENSSSCT00000028141	GO:0004745(retinol dehydrogenase activity);GO:0008202(steroid metabolic process);GO:0043231(intracellular membrane-bounded organelle);GO:0047023(androsterone dehydrogenase activity);GO:0047044(androstan-3-alpha,17-beta-diol dehydrogenase activity);GO:0055114(oxidation-reduction process);GO:0005730(nucleolus);GO:0005829(cytosol);GO:0016491(oxidoreductase activity);GO:0055114(oxidation-reduction pr…	00830(Retinol metabolism);00830(Retinol metabolism)	K11154	EC:1.1.1.-	retinol dehydrogenase 16 (all-trans) [Source:NCBI gene;Acc:100511633];short chain dehydrogenase/reductase family 9C member 7 [Source:NCBI gene;Acc:100626104]	protein_coding	0.994293	1.05587	1.08093	1.50043	1.43257	3.05971	1.29365	2.31749	1.79628	2.16917	0.570131	-0.810635	0.0176058	0.622136	down	no
MSTRG.32853	UGT2B31;ENSSSCG00000040980;ENSSSCG00000037635;ENSSSCG00000034735	ENSSSCT00000009783;ENSSSCT00000052885;ENSSSCT00000029869;ENSSSCT00000058590;ENSSSCT00000039525;ENSSSCT00000009784;ENSSSCT00000065698;ENSSSCT00000041226;ENSSSCT00000040255;ENSSSCT00000045680;ENSSSCT00000026797;ENSSSCT00000040634;ENSSSCT00000058733;ENSSSCT00000051796;ENSSSCT00000051620	GO:0008194(UDP-glycosyltransferase activity);GO:0015020(glucuronosyltransferase activity);GO:0016020(membrane);GO:0016021(integral component of membrane);GO:0016740(transferase activity);GO:0016757(transferase activity, transferring glycosyl groups);GO:0016758(transferase activity, transferring hexosyl groups);GO:0043231(intracellular membrane-bounded organelle);GO:0043231(intracellular membrane-…	00040(Pentose and glucuronate interconversions);00053(Ascorbate and aldarate metabolism);00140(Steroid hormone biosynthesis);00830(Retinol metabolism);00860(Porphyrin and chlorophyll metabolism);00980(Metabolism of xenobiotics by cytochrome P450);00982(Drug metabolism - cytochrome P450);00983(Drug metabolism - other enzymes);05204(Chemical carcinogenesis);05204(Chemical carcinogenesis)	K00699	EC:2.4.1.17	UDP-glucuronosyltransferase 2B31 [Source:NCBI gene;Acc:100514063];UDP-glucuronosyltransferase 2B31 [Source:NCBI gene;Acc:100515741];UDP-glucuronosyltransferase 2B31-like [Source:NCBI gene;Acc:100623504]	protein_coding	0.0208552	0.0208115	0.0162361	0.0351221	0.0162313	0.0253518	0.13342	0.0311458	0.0187354	0.109666	0.343229	-1.54276	0.0176124	0.622136	down	yes
MSTRG.27250	SPINT2	ENSSSCT00000063727;ENSSSCT00000003277;ENSSSCT00000047857	GO:0001843(neural tube closure);GO:0004867(serine-type endopeptidase inhibitor activity);GO:0005737(cytoplasm);GO:0007163(establishment or maintenance of cell polarity);GO:0010951(negative regulation of endopeptidase activity);GO:0016020(membrane);GO:0016021(integral component of membrane);GO:0022408(negative regulation of cell-cell adhesion);GO:0060672(epithelial cell morphogenesis involved in p…	NA	NA	NA	serine peptidase inhibitor, Kunitz type 2 [Source:NCBI gene;Acc:100515207]	protein_coding	1.07258	1.4076	1.9854	2.55929	1.14928	1.80859	7.27523	1.65917	1.04974	8.19215	0.409016	-1.28977	0.01792	0.627273	down	yes
MSTRG.6155	PPP1R1B	ENSSSCT00000019051;ENSSSCT00000060749;ENSSSCT00000046553	GO:0001975(response to amphetamine);GO:0004864(protein phosphatase inhibitor activity);GO:0005634(nucleus);GO:0005737(cytoplasm);GO:0005829(cytosol);GO:0006351(transcription, DNA-templated);GO:0007165(signal transduction);GO:0007621(negative regulation of female receptivity);GO:0007626(locomotory behavior);GO:0008542(visual learning);GO:0032515(negative regulation of phosphoprotein phosphatase ac…	04024(cAMP signaling pathway);04728(Dopaminergic synapse);05030(Cocaine addiction);05031(Amphetamine addiction);05034(Alcoholism);05034(Alcoholism)	K15494	NA	protein phosphatase 1 regulatory inhibitor subunit 1B [Source:NCBI gene;Acc:100736966]	protein_coding	9.84354	0.790052	1.97027	1.69562	0.846912	0.822934	1.54208	1.48187	0.851566	0.610004	2.85326	1.51261	0.0180866	0.62957	up	yes
MSTRG.72	PACRG	ENSSSCT00000057322	GO:0001664(G protein-coupled receptor binding);GO:0003779(actin binding);GO:0005829(cytosol);GO:0005929(cilium);GO:0007286(spermatid development);GO:0030544(Hsp70 protein binding);GO:0031072(heat shock protein binding);GO:0031625(ubiquitin protein ligase binding);GO:0031982(vesicle);GO:0043005(neuron projection);GO:0043014(alpha-tubulin binding);GO:0044297(cell body);GO:0048487(beta-tubulin bindi…	NA	NA	NA	parkin coregulated [Source:NCBI gene;Acc:106506364]	protein_coding	0.201911	0.656182	0.242733	0.280412	0.230765	0.377314	1.36083	0.340796	0.498252	1.62688	0.383438	-1.38293	0.0181108	0.62957	down	yes
MSTRG.20544	SEPT1	ENSSSCT00000008548;ENSSSCT00000059906	GO:0000166(nucleotide binding);GO:0003924(GTPase activity);GO:0005525(GTP binding);GO:0005940(septin ring);GO:0007056(spindle assembly involved in female meiosis);GO:0008021(synaptic vesicle);GO:0015630(microtubule cytoskeleton);GO:0017157(regulation of exocytosis);GO:0030496(midbody);GO:0031105(septin complex);GO:0032947(protein-containing complex scaffold activity);GO:0051311(meiotic metaphase …	05100(Bacterial invasion of epithelial cells);05100(Bacterial invasion of epithelial cells)	K13737	NA	septin 1 [Source:NCBI gene;Acc:100514708]	protein_coding	0.185025	0.149655	0.159395	0.223703	0.135819	0.316263	0.335703	0.439658	0.231636	0.657894	0.430858	-1.21472	0.0181886	0.631259	down	yes
MSTRG.17571	FAM111A	ENSSSCT00000057269;ENSSSCT00000051290	GO:0000785(chromatin);GO:0001650(fibrillar center);GO:0005634(nucleus);GO:0005737(cytoplasm);GO:0006260(DNA replication);GO:0045071(negative regulation of viral genome replication);GO:0045071(negative regulation of viral genome replication)	NA	NA	NA	family with sequence similarity 111 member A [Source:NCBI gene;Acc:100525029]	protein_coding	7.57988	3.91698	1.94124	13.102	11.908	1.79164	4.68945	3.02085	2.64785	5.54078	2.17337	1.11993	0.0182273	0.631707	up	yes
MSTRG.5029	STOML3	ENSSSCT00000010263	GO:0005929(cilium);GO:0007165(signal transduction);GO:0016020(membrane);GO:0016021(integral component of membrane);GO:0045121(membrane raft)	NA	K17286	NA	stomatin like 3 [Source:NCBI gene;Acc:100525123]	protein_coding	1.33735	1.33795	1.57262	1.45429	1.4011	2.0326	3.13463	1.785	1.91293	4.49928	0.531508	-0.911836	0.0182673	0.631707	down	no
MSTRG.10253	LPL	ENSSSCT00000055922;ENSSSCT00000055831	GO:0004465(lipoprotein lipase activity);GO:0004806(triglyceride lipase activity);GO:0005102(signaling receptor binding);GO:0005509(calcium ion binding);GO:0005515(protein binding);GO:0005576(extracellular region);GO:0005615(extracellular space);GO:0005886(plasma membrane);GO:0006629(lipid metabolic process);GO:0006631(fatty acid metabolic process);GO:0006633(fatty acid biosynthetic process);GO:00…	00561(Glycerolipid metabolism);03320(PPAR signaling pathway);04979(Cholesterol metabolism);05010(Alzheimer disease);05010(Alzheimer disease)	K01059	EC:3.1.1.34	lipoprotein lipase [Source:NCBI gene;Acc:397537]	protein_coding	0.988028	1.12672	2.63711	1.69262	0.8819	1.31269	17.6949	1.42605	1.15927	1.16459	0.321933	-1.63517	0.0182864	0.631707	down	yes
MSTRG.5135	HTR2A	ENSSSCT00000062914	GO:0004930(G protein-coupled receptor activity);GO:0004993(G protein-coupled serotonin receptor activity);GO:0005886(plasma membrane);GO:0005887(integral component of plasma membrane);GO:0006874(cellular calcium ion homeostasis);GO:0007165(signal transduction);GO:0007186(G protein-coupled receptor signaling pathway);GO:0007202(activation of phospholipase C activity);GO:0007210(serotonin receptor …	04020(Calcium signaling pathway);04080(Neuroactive ligand-receptor interaction);04540(Gap junction);04726(Serotonergic synapse);04750(Inflammatory mediator regulation of TRP channels)	K04157	NA	5-hydroxytryptamine receptor 2A [Source:NCBI gene;Acc:397432]	protein_coding	1.28783	3.86259	1.34218	2.4517	4.20322	1.6437	0.368977	2.21059	1.11736	0.72231	2.16851	1.1167	0.0183143	0.63194	up	yes
MSTRG.3056	C9orf152	ENSSSCT00000005997	NA	NA	NA	NA	chromosome 1 C9orf152 homolog [Source:NCBI gene;Acc:100512390]	protein_coding	0.447663	1.63335	0.410153	0.509206	0.699609	1.80502	2.61794	1.37034	2.30006	0.79091	0.416464	-1.26373	0.0184852	0.634349	down	yes
MSTRG.19713	MZB1	ENSSSCT00000030384	GO:0002642(positive regulation of immunoglobulin biosynthetic process);GO:0005576(extracellular region);GO:0005788(endoplasmic reticulum lumen);GO:0008284(positive regulation of cell population proliferation);GO:0030888(regulation of B cell proliferation);GO:0033622(integrin activation);GO:0034663(endoplasmic reticulum chaperone complex);GO:0042127(regulation of cell population proliferation);GO:…	NA	NA	NA	marginal zone B and B1 cell specific protein [Source:NCBI gene;Acc:100522482]	protein_coding	0.190742	0.195301	0.285601	0.328529	0.181153	0.370029	0.931922	0.50061	0.401562	0.705896	0.405951	-1.30062	0.0184862	0.634349	down	yes
MSTRG.23711	SELENBP1	ENSSSCT00000039327;ENSSSCT00000065538;ENSSSCT00000007258;ENSSSCT00000060270;ENSSSCT00000056577	GO:0001650(fibrillar center);GO:0005730(nucleolus);GO:0008430(selenium binding);GO:0008430(selenium binding)	NA	K17285	NA	selenium binding protein 1 [Source:NCBI gene;Acc:100152724]	protein_coding	28.6653	19.3071	19.1836	30.7273	27.7485	24.6402	243.942	25.3239	29.8488	15.3282	0.370504	-1.43244	0.0185403	0.63532	down	yes
MSTRG.2028	C15orf61	ENSSSCT00000005466	NA	NA	NA	NA	chromosome 1 C15orf61 homolog [Source:NCBI gene;Acc:100152039]	protein_coding	0.137236	0.349158	0.294204	0.983041	0.294403	1.30273	1.39176	0.67847	1.04682	1.2611	0.362275	-1.46484	0.0187877	0.64232	down	yes
MSTRG.11749	PRXL2A	ENSSSCT00000011320;ENSSSCT00000060581;ENSSSCT00000049016;ENSSSCT00000055715;ENSSSCT00000062410	GO:0005737(cytoplasm);GO:0016020(membrane);GO:0016021(integral component of membrane);GO:0016209(antioxidant activity);GO:0045670(regulation of osteoclast differentiation);GO:0055114(oxidation-reduction process);GO:0098869(cellular oxidant detoxification);GO:0098869(cellular oxidant detoxification)	NA	NA	NA	Sus scrofa peroxiredoxin like 2A (PRXL2A), transcript variant 6, mRNA. [Source:RefSeq mRNA;Acc:NM_001359938]	protein_coding	5.6094	5.11994	1.42873	6.4339	2.28276	4.5553	43.6342	4.68851	4.08303	3.68346	0.344215	-1.53862	0.0188846	0.644893	down	yes
MSTRG.33543	HERC6	ENSSSCT00000054937;ENSSSCT00000026224	GO:0002244(hematopoietic progenitor cell differentiation);GO:0004842(ubiquitin-protein transferase activity);GO:0005634(nucleus);GO:0005829(cytosol);GO:0009617(response to bacterium);GO:0016567(protein ubiquitination);GO:0016740(transferase activity);GO:0016740(transferase activity)	NA	K22372	EC:2.3.2.-	HECT and RLD domain containing E3 ubiquitin protein ligase family member 6 [Source:NCBI gene;Acc:100626657]	protein_coding	4.12942	3.74699	3.91149	19.7003	4.73499	2.80966	3.78578	2.82402	1.64234	5.29864	2.21407	1.1467	0.0189398	0.646037	up	yes
MSTRG.32485	C4orf19	ENSSSCT00000043263;ENSSSCT00000009596;ENSSSCT00000043901	GO:0005654(nucleoplasm);GO:0030054(cell junction);GO:0030054(cell junction)	NA	NA	NA	chromosome 8 C4orf19 homolog [Source:NCBI gene;Acc:100738623]	protein_coding	0.122819	0.337788	0.226485	0.246194	0.264441	0.486845	0.869359	0.36487	0.175985	1.31482	0.372906	-1.42312	0.0194696	0.660324	down	yes
ENSSSCG00000026386	SLC30A2	ENSSSCT00000025811	GO:0005385(zinc ion transmembrane transporter activity);GO:0005737(cytoplasm);GO:0005770(late endosome);GO:0005886(plasma membrane);GO:0006812(cation transport);GO:0008324(cation transmembrane transporter activity);GO:0010043(response to zinc ion);GO:0016020(membrane);GO:0016021(integral component of membrane);GO:0043231(intracellular membrane-bounded organelle);GO:0055085(transmembrane transport…	NA	K14689	NA	solute carrier family 30 member 2 [Source:NCBI gene;Acc:100170651]	protein_coding	0.133214	0.087931	0.019173	0.060979	0.134235	0.0001	0.926087	0.160616	0.178853	0.736703	0.217509	-2.20085	0.0196344	0.664402	down	yes
MSTRG.31380	DHRS4;CARMIL3	ENSSSCT00000043526;ENSSSCT00000002251;ENSSSCT00000046051;ENSSSCT00000048451;ENSSSCT00000002252	GO:0000253(3-keto sterol reductase activity);GO:0001758(retinal dehydrogenase activity);GO:0004090(carbonyl reductase (NADPH) activity);GO:0005739(mitochondrion);GO:0005777(peroxisome);GO:0016491(oxidoreductase activity);GO:0042574(retinal metabolic process);GO:0042802(identical protein binding);GO:0055114(oxidation-reduction process);GO:0005515(protein binding);GO:0005886(plasma membrane);GO:005…	00830(Retinol metabolism);04146(Peroxisome);04146(Peroxisome)	K11147;K20493	EC:1.1.-.-	dehydrogenase/reductase (SDR family) member 4 [Source:NCBI gene;Acc:397082];capping protein regulator and myosin 1 linker 3 [Source:NCBI gene;Acc:100154847]	protein_coding	1.82953	1.49425	1.65052	2.24043	0.963859	1.33297	14.8089	1.68376	1.69245	2.00285	0.380029	-1.39582	0.019692	0.665096	down	yes
MSTRG.17897	MPPED2	ENSSSCT00000014554	GO:0016787(hydrolase activity)	NA	NA	NA	metallophosphoesterase domain containing 2 [Source:NCBI gene;Acc:100515427]	protein_coding	0.425595	0.639979	0.679055	0.533789	0.415247	0.613843	2.52498	0.758093	0.516635	2.0784	0.414924	-1.26908	0.0198722	0.670164	down	yes
MSTRG.17174	IRF7	ENSSSCT00000035232;ENSSSCT00000014049	GO:0000978(RNA polymerase II proximal promoter sequence-specific DNA binding);GO:0000981(DNA-binding transcription factor activity, RNA polymerase II-specific);GO:0000987(proximal promoter sequence-specific DNA binding);GO:0001158(enhancer sequence-specific DNA binding);GO:0002376(immune system process);GO:0002819(regulation of adaptive immune response);GO:0003677(DNA binding);GO:0003700(DNA-bind…	04620(Toll-like receptor signaling pathway);04621(NOD-like receptor signaling pathway);04622(RIG-I-like receptor signaling pathway);04623(Cytosolic DNA-sensing pathway);05160(Hepatitis C);05161(Hepatitis B);05162(Measles);05164(Influenza A);05167(Kaposi sarcoma-associated herpesvirus infection);05168(Herpes simplex virus 1 infection);05169(Epstein-Barr virus infection);05203(Viral carcinogenesis)…	K09447	NA	interferon regulatory factor 7 [Source:NCBI gene;Acc:100037289]	protein_coding	0.70079	0.537971	0.798318	5.20958	0.194231	0.281839	0.575148	0.138665	0.349518	0.89904	3.31559	1.72927	0.0200077	0.673969	up	yes
MSTRG.24053	RBM15	ENSSSCT00000060223;ENSSSCT00000061298;ENSSSCT00000065773;ENSSSCT00000007458;ENSSSCT00000007457	GO:0000122(negative regulation of transcription by RNA polymerase II);GO:0000381(regulation of alternative mRNA splicing, via spliceosome);GO:0001510(RNA methylation);GO:0001569(branching involved in blood vessel morphogenesis);GO:0003676(nucleic acid binding);GO:0003723(RNA binding);GO:0003729(mRNA binding);GO:0005634(nucleus);GO:0005654(nucleoplasm);GO:0007221(positive regulation of transcripti…	NA	K13190	NA	RNA binding motif protein 15 [Source:NCBI gene;Acc:100155227]	protein_coding	1.15376	2.04609	1.74638	3.83659	1.60298	4.21992	4.22018	4.46351	2.25036	3.87471	0.545797	-0.873563	0.0201787	0.678626	down	no
MSTRG.28588	ENSSSCG00000037566	ENSSSCT00000063647	NA	NA	K18084	NA	myotubularin-related protein 9 [Source:NCBI gene;Acc:106510645]	protein_coding	4.85998	1.71215	2.61006	2.55828	3.80002	1.72277	1.66577	1.62704	1.66284	1.64254	1.86763	0.901208	0.0204281	0.68503	up	no
MSTRG.20467	GUSB	ENSSSCT00000008484	GO:0004553(hydrolase activity, hydrolyzing O-glycosyl compounds);GO:0004566(beta-glucuronidase activity);GO:0005102(signaling receptor binding);GO:0005615(extracellular space);GO:0005764(lysosome);GO:0005975(carbohydrate metabolic process);GO:0008152(metabolic process);GO:0016787(hydrolase activity);GO:0016798(hydrolase activity, acting on glycosyl bonds);GO:0019391(glucuronoside catabolic proces…	00040(Pentose and glucuronate interconversions);00531(Glycosaminoglycan degradation);00860(Porphyrin and chlorophyll metabolism);00983(Drug metabolism - other enzymes);04142(Lysosome)	K01195	EC:3.2.1.31	glucuronidase beta [Source:NCBI gene;Acc:100144519]	protein_coding	18.0891	16.2153	10.2009	12.9055	8.91999	14.812	126.087	11.064	14.6947	10.1033	0.375257	-1.41405	0.0205352	0.687673	down	yes
MSTRG.29299	LEPR	ENSSSCT00000049356;ENSSSCT00000028665	GO:0001525(angiogenesis);GO:0004896(cytokine receptor activity);GO:0005515(protein binding);GO:0005977(glycogen metabolic process);GO:0006909(phagocytosis);GO:0008203(cholesterol metabolic process);GO:0009897(external side of plasma membrane);GO:0010507(negative regulation of autophagy);GO:0014009(glial cell proliferation);GO:0016020(membrane);GO:0016021(integral component of membrane);GO:0017046…	04060(Cytokine-cytokine receptor interaction);04080(Neuroactive ligand-receptor interaction);04152(AMPK signaling pathway);04630(Jak-STAT signaling pathway);04920(Adipocytokine signaling pathway);04932(Non-alcoholic fatty liver disease (NAFLD));04932(Non-alcoholic fatty liver disease (NAFLD))	K05062	NA	leptin receptor [Source:NCBI gene;Acc:396836]	protein_coding	0.283541	0.429969	0.672461	1.02198	0.375208	0.470055	6.03065	0.636587	0.104456	1.50967	0.318024	-1.65279	0.0206838	0.689987	down	yes
MSTRG.9685	TMPRSS7	ENSSSCT00000024472	GO:0004252(serine-type endopeptidase activity);GO:0005515(protein binding);GO:0005886(plasma membrane);GO:0006508(proteolysis);GO:0008233(peptidase activity);GO:0008236(serine-type peptidase activity);GO:0016020(membrane);GO:0016021(integral component of membrane);GO:0016787(hydrolase activity)	NA	K09638	EC:3.4.21.-	transmembrane serine protease 7 [Source:NCBI gene;Acc:100627225]	protein_coding	0.784902	0.016289	0.019721	2.4873	0.052017	0.064404	0.225544	0.101452	0.107662	0.0001	6.73173	2.75098	0.0207767	0.690501	up	yes
ENSSSCG00000016093	ENSSSCG00000016093	ENSSSCT00000017521	GO:0004854(xanthine dehydrogenase activity);GO:0005506(iron ion binding);GO:0005829(cytosol);GO:0009055(electron transfer activity);GO:0009115(xanthine catabolic process);GO:0016491(oxidoreductase activity);GO:0022900(electron transport chain);GO:0046872(metal ion binding);GO:0050660(flavin adenine dinucleotide binding);GO:0051287(NAD binding);GO:0051536(iron-sulfur cluster binding);GO:0051537(2 …	00280(Valine, leucine and isoleucine degradation);00350(Tyrosine metabolism);00380(Tryptophan metabolism);00750(Vitamin B6 metabolism);00760(Nicotinate and nicotinamide metabolism);00830(Retinol metabolism);00982(Drug metabolism - cytochrome P450);04630(Jak-STAT signaling pathway)	K00157	EC:1.2.3.1	aldehyde oxidase 2 [Source:NCBI gene;Acc:100525616]	protein_coding	0.043258	0.062737	0.123172	0.095967	0.017022	0.197618	0.137858	0.151655	0.211393	0.217308	0.373601	-1.42043	0.0209603	0.694344	down	yes
MSTRG.17952	PTPN5	ENSSSCT00000014589;ENSSSCT00000049408;ENSSSCT00000057185	GO:0001784(phosphotyrosine residue binding);GO:0004721(phosphoprotein phosphatase activity);GO:0004725(protein tyrosine phosphatase activity);GO:0006470(protein dephosphorylation);GO:0016311(dephosphorylation);GO:0016787(hydrolase activity);GO:0016791(phosphatase activity);GO:0035335(peptidyl-tyrosine dephosphorylation);GO:0035335(peptidyl-tyrosine dephosphorylation)	04010(MAPK signaling pathway);04010(MAPK signaling pathway)	K18018	EC:3.1.3.48	protein tyrosine phosphatase, non-receptor type 5 [Source:NCBI gene;Acc:100524422]	protein_coding	0.460933	0.247078	0.523452	0.30731	0.302917	0.24836	5.46252	0.262806	0.539552	0.116998	0.277771	-1.84803	0.0210749	0.697298	down	yes
MSTRG.36211	SPIN3	ENSSSCT00000041788	GO:0007276(gamete generation);GO:0035064(methylated histone binding)	NA	NA	NA	spindlin family member 3 [Source:NCBI gene;Acc:100525440]	protein_coding	0.0772846	0.204783	1.37726	1.10775	1.34058	2.57348	1.57339	2.45328	2.66644	1.34912	0.386942	-1.36981	0.0210997	0.697345	down	yes
MSTRG.9490	ENSSSCG00000011892	ENSSSCT00000013013	NA	NA	NA	NA	MYCBP associated and testis expressed 1 [Source:NCBI gene;Acc:100154779]	protein_coding	0.246686	0.676018	0.63625	0.417059	0.409482	0.431033	1.98245	0.465374	0.461663	2.6935	0.395341	-1.33883	0.0217755	0.714061	down	yes
MSTRG.25757	USP18	ENSSSCT00000042763;ENSSSCT00000064310;ENSSSCT00000000838;ENSSSCT00000065704	GO:0004197(cysteine-type endopeptidase activity);GO:0004843(thiol-dependent ubiquitin-specific protease activity);GO:0005829(cytosol);GO:0006511(ubiquitin-dependent protein catabolic process);GO:0009617(response to bacterium);GO:0016579(protein deubiquitination);GO:0019785(ISG15-specific protease activity);GO:0031647(regulation of protein stability);GO:0035634(response to stilbenoid);GO:0036459(t…	NA	K11846	EC:3.4.19.12	ubiquitin specific peptidase 18 [Source:NCBI gene;Acc:396777]	protein_coding	2.42417	2.30259	1.79981	17.3388	2.95843	1.55537	2.92491	1.66416	1.7344	2.88079	2.49301	1.31789	0.0221905	0.726141	up	yes
MSTRG.17170	ENSSSCG00000014565	ENSSSCT00000015915;ENSSSCT00000035772;ENSSSCT00000040203	GO:0005886(plasma membrane);GO:0016020(membrane);GO:0016021(integral component of membrane);GO:0034341(response to interferon-gamma);GO:0035455(response to interferon-alpha);GO:0035456(response to interferon-beta);GO:0045071(negative regulation of viral genome replication);GO:0046597(negative regulation of viral entry into host cell);GO:0051607(defense response to virus);GO:0060337(type I interfe…	04662(B cell receptor signaling pathway);04662(B cell receptor signaling pathway)	K06566;K19831	NA	interferon-induced transmembrane protein 1 [Source:NCBI gene;Acc:100127358]	protein_coding	4.28513	3.51127	7.97281	23.465	5.65575	2.78755	4.58658	3.95335	3.60536	6.1324	2.131	1.09153	0.0222452	0.727132	up	yes
MSTRG.30568	DNAH8	ENSSSCT00000001768;ENSSSCT00000062970	GO:0003777(microtubule motor activity);GO:0005524(ATP binding);GO:0007018(microtubule-based movement);GO:0008569(ATP-dependent microtubule motor activity, minus-end-directed);GO:0030286(dynein complex);GO:0036157(outer dynein arm);GO:0036158(outer dynein arm assembly);GO:0045503(dynein light chain binding);GO:0045505(dynein intermediate chain binding);GO:0051959(dynein light intermediate chain bi…	05016(Huntington disease);05016(Huntington disease)	K10408	NA	dynein axonemal heavy chain 8 [Source:NCBI gene;Acc:100156478]	protein_coding	0.0243735	0.0628012	0.0164438	0.0498407	0.0402451	0.0513252	0.41435	0.0476405	0.0307291	0.0702384	0.315334	-1.66505	0.0223761	0.728431	down	yes
MSTRG.31013	NRG4	ENSSSCT00000002085	GO:0005102(signaling receptor binding);GO:0005615(extracellular space);GO:0007399(nervous system development);GO:0016020(membrane);GO:0016021(integral component of membrane);GO:0035556(intracellular signal transduction)	04012(ErbB signaling pathway)	K05458	NA	neuregulin 4 [Source:NCBI gene;Acc:100516621]	protein_coding	1.20187	0.654763	0.960401	0.705216	0.6049	1.23285	2.73425	1.02771	1.20429	3.52635	0.424366	-1.23662	0.0223866	0.728431	down	yes
MSTRG.2027	IQCH	ENSSSCT00000049360;ENSSSCT00000066199	GO:0005515(protein binding);GO:0005515(protein binding)	NA	NA	NA	IQ motif containing H [Source:NCBI gene;Acc:102166010]	protein_coding	0.104894	0.124749	0.0936981	0.16157	0.142796	0.112895	0.480877	0.187352	0.188008	0.620645	0.39484	-1.34066	0.0224072	0.728431	down	yes
ENSSSCG00000027365	WNT7B	ENSSSCT00000044039;ENSSSCT00000022611	GO:0005102(signaling receptor binding);GO:0005109(frizzled binding);GO:0005576(extracellular region);GO:0005615(extracellular space);GO:0007275(multicellular organism development);GO:0010469(regulation of signaling receptor activity);GO:0016055(Wnt signaling pathway);GO:0021871(forebrain regionalization);GO:0030182(neuron differentiation);GO:0045165(cell fate commitment);GO:0046330(positive regul…	04150(mTOR signaling pathway);04310(Wnt signaling pathway);04390(Hippo signaling pathway);04550(Signaling pathways regulating pluripotency of stem cells);04916(Melanogenesis);04934(Cushing syndrome);05165(Human papillomavirus infection);05200(Pathways in cancer);05205(Proteoglycans in cancer);05217(Basal cell carcinoma);05224(Breast cancer);05225(Hepatocellular carcinoma);05226(Gastric cancer);05…	K00572	NA	Wnt family member 7B [Source:NCBI gene;Acc:100626947]	protein_coding	0.0109443	0.0422614	0.0404715	0.104163	0.0525001	0.0723758	0.290665	0.0001	0.0215782	0.982679	0.183078	-2.44947	0.0228382	0.737766	down	yes
MSTRG.18294	KLF2	ENSSSCT00000059610	GO:0000122(negative regulation of transcription by RNA polymerase II);GO:0000790(nuclear chromatin);GO:0000902(cell morphogenesis);GO:0000981(DNA-binding transcription factor activity, RNA polymerase II-specific);GO:0001701(in utero embryonic development);GO:0003676(nucleic acid binding);GO:0003677(DNA binding);GO:0003700(DNA-binding transcription factor activity);GO:0005634(nucleus);GO:0034101(e…	04068(FoxO signaling pathway);04371(Apelin signaling pathway);05418(Fluid shear stress and atherosclerosis)	K17845	NA	Kruppel like factor 2 [Source:NCBI gene;Acc:100174959]	protein_coding	3.91066	8.73844	18.6787	8.83309	9.27237	4.84374	3.27127	8.96254	4.55266	3.89922	1.93633	0.953323	0.022843	0.737766	up	no
MSTRG.2630	RFX3	ENSSSCT00000005759;ENSSSCT00000057324;ENSSSCT00000022279	GO:0000790(nuclear chromatin);GO:0000978(RNA polymerase II proximal promoter sequence-specific DNA binding);GO:0003677(DNA binding);GO:0003700(DNA-binding transcription factor activity);GO:0005634(nucleus);GO:0006351(transcription, DNA-templated);GO:0006355(regulation of transcription, DNA-templated);GO:0006357(regulation of transcription by RNA polymerase II);GO:0007368(determination of left/rig…	NA	K09173	NA	regulatory factor X3 [Source:NCBI gene;Acc:100523418]	protein_coding	0.981784	1.57706	3.7061	2.62709	1.41154	3.59702	4.57553	3.5218	1.85599	6.52294	0.513298	-0.962131	0.0228689	0.737801	down	no
MSTRG.14534	EMB	ENSSSCT00000030477	GO:0005886(plasma membrane);GO:0007156(homophilic cell adhesion via plasma membrane adhesion molecules);GO:0007411(axon guidance);GO:0016020(membrane);GO:0016021(integral component of membrane);GO:0030424(axon);GO:0070593(dendrite self-avoidance);GO:0098632(cell-cell adhesion mediator activity)	NA	NA	NA	embigin [Source:NCBI gene;Acc:100622067]	protein_coding	0.204559	0.291647	0.877368	0.700391	0.59581	0.96116	2.60664	0.444941	0.259375	3.46162	0.345211	-1.53445	0.0231504	0.745266	down	yes
MSTRG.6973	ENSSSCG00000017934	ENSSSCT00000028238;ENSSSCT00000019518	GO:0005198(structural molecule activity);GO:0005886(plasma membrane);GO:0005923(bicellular tight junction);GO:0016020(membrane);GO:0016021(integral component of membrane);GO:0016323(basolateral plasma membrane);GO:0016327(apicolateral plasma membrane);GO:0016328(lateral plasma membrane);GO:0030054(cell junction);GO:0030054(cell junction)	04514(Cell adhesion molecules (CAMs));04530(Tight junction);04670(Leukocyte transendothelial migration);05160(Hepatitis C);05160(Hepatitis C)	K06087	NA	claudin 7 [Source:NCBI gene;Acc:100127486]	protein_coding	0.241531	0.375863	0.401035	0.42809	0.535182	0.428405	1.08863	0.425707	0.356169	2.846	0.385177	-1.37641	0.0233791	0.751006	down	yes
MSTRG.3227	ENSSSCG00000027589	ENSSSCT00000006454	GO:0004930(G protein-coupled receptor activity);GO:0004984(olfactory receptor activity);GO:0005886(plasma membrane);GO:0007165(signal transduction);GO:0007186(G protein-coupled receptor signaling pathway);GO:0007608(sensory perception of smell);GO:0016020(membrane);GO:0016021(integral component of membrane);GO:0050896(response to stimulus);GO:0050911(detection of chemical stimulus involved in sen…	NA	NA	NA		protein_coding	0.044321	0.316791	0.195313	0.159209	0.013455	0.616807	0.027471	0.265122	2.87754	0.040051	0.190512	-2.39204	0.0234242	0.751644	down	yes
MSTRG.24414	CELSR1	ENSSSCT00000066405;ENSSSCT00000045100;ENSSSCT00000051051;ENSSSCT00000047404	GO:0001736(establishment of planar polarity);GO:0001764(neuron migration);GO:0001843(neural tube closure);GO:0001942(hair follicle development);GO:0004888(transmembrane signaling receptor activity);GO:0004930(G protein-coupled receptor activity);GO:0005509(calcium ion binding);GO:0005654(nucleoplasm);GO:0005886(plasma membrane);GO:0007155(cell adhesion);GO:0007156(homophilic cell adhesion via pla…	NA	NA	NA	cadherin EGF LAG seven-pass G-type receptor 1 [Source:NCBI gene;Acc:102159820]	protein_coding	0.656547	0.40569	1.11433	1.24794	1.10031	0.585161	3.62804	0.559853	0.491623	7.03678	0.367828	-1.4429	0.0234986	0.75241	down	yes
MSTRG.24570	FAM83F	ENSSSCT00000000085	NA	NA	NA	NA	family with sequence similarity 83 member F [Source:NCBI gene;Acc:100155438]	protein_coding	0.281348	0.099537	0.216521	0.344412	0.093182	0.095112	1.18988	0.060107	0.249118	1.91164	0.295221	-1.76013	0.0237828	0.757384	down	yes
MSTRG.16030	EYA2	ENSSSCT00000046983;ENSSSCT00000008157	GO:0000287(magnesium ion binding);GO:0004721(phosphoprotein phosphatase activity);GO:0004725(protein tyrosine phosphatase activity);GO:0005634(nucleus);GO:0005737(cytoplasm);GO:0005739(mitochondrion);GO:0005829(cytosol);GO:0006470(protein dephosphorylation);GO:0007275(multicellular organism development);GO:0014706(striated muscle tissue development);GO:0016576(histone dephosphorylation);GO:001678…	NA	K17620	EC:3.1.3.48	EYA transcriptional coactivator and phosphatase 2 [Source:NCBI gene;Acc:100624872]	protein_coding	0.068144	0.323718	0.565695	0.540759	0.251932	0.408312	0.676794	0.293108	0.385137	3.46818	0.334558	-1.57967	0.0238874	0.758242	down	yes
MSTRG.15878	TGM2	ENSSSCT00000031001	GO:0003810(protein-glutamine gamma-glutamyltransferase activity);GO:0005739(mitochondrion);GO:0005783(endoplasmic reticulum);GO:0005829(cytosol);GO:0018149(peptide cross-linking);GO:0031226(intrinsic component of plasma membrane);GO:0032471(negative regulation of endoplasmic reticulum calcium ion concentration);GO:0043065(positive regulation of apoptotic process);GO:0043277(apoptotic cell clearan…	05016(Huntington disease)	K05625	EC:2.3.2.13	transglutaminase 2 [Source:NCBI gene;Acc:100154530]	protein_coding	30.7621	25.3495	38.5319	38.9272	68.2556	27.0988	25.5991	26.1292	21.1508	21.621	1.65977	0.730984	0.0239099	0.758242	up	no
MSTRG.4103	C9orf24	ENSSSCT00000012017	GO:0002177(manchette);GO:0005634(nucleus);GO:0005737(cytoplasm);GO:0034622(cellular protein-containing complex assembly);GO:0043014(alpha-tubulin binding);GO:0048471(perinuclear region of cytoplasm)	NA	K18634	NA	chromosome 10 C9orf24 homolog [Source:NCBI gene;Acc:100522632]	protein_coding	0.299508	0.563101	0.463115	0.400076	0.480992	0.487794	1.72535	0.327254	0.574556	3.21878	0.348418	-1.52111	0.0240918	0.760748	down	yes
MSTRG.33982	KCNE3	ENSSSCT00000056547;ENSSSCT00000032428	GO:0005249(voltage-gated potassium channel activity);GO:0005251(delayed rectifier potassium channel activity);GO:0005737(cytoplasm);GO:0005886(plasma membrane);GO:0006811(ion transport);GO:0006813(potassium ion transport);GO:0008076(voltage-gated potassium channel complex);GO:0015459(potassium channel regulator activity);GO:0016020(membrane);GO:0016021(integral component of membrane);GO:0030425(d…	04974(Protein digestion and absorption);04974(Protein digestion and absorption)	K04897	NA	potassium voltage-gated channel subfamily E regulatory subunit 3 [Source:NCBI gene;Acc:397168]	protein_coding	1.03061	0.388174	0.409492	0.51058	1.13172	0.658383	3.83916	0.588844	0.544003	3.64962	0.373983	-1.41895	0.0241327	0.760748	down	yes
MSTRG.25573	ENSSSCG00000040403	ENSSSCT00000062427	GO:0003677(DNA binding);GO:0005634(nucleus);GO:0006355(regulation of transcription, DNA-templated);GO:0043565(sequence-specific DNA binding)	NA	NA	NA	Nanog homeobox [Source:NCBI gene;Acc:106507523]	protein_coding	4.19787	2.92196	3.00066	4.00368	4.69534	2.2505	1.3739	1.65827	2.6095	1.92716	1.91658	0.938533	0.0241422	0.760748	up	no
MSTRG.7604	CSRNP1	ENSSSCT00000042469;ENSSSCT00000012332;ENSSSCT00000040869	GO:0001228(DNA-binding transcription activator activity, RNA polymerase II-specific);GO:0003700(DNA-binding transcription factor activity);GO:0005634(nucleus);GO:0006355(regulation of transcription, DNA-templated);GO:0009791(post-embryonic development);GO:0043565(sequence-specific DNA binding);GO:0045944(positive regulation of transcription by RNA polymerase II);GO:0048008(platelet-derived growth…	NA	K17494	NA	cysteine and serine rich nuclear protein 1 [Source:NCBI gene;Acc:100519275]	protein_coding	2.40796	1.99718	3.28236	0.523772	2.10582	0.994346	1.18715	1.31057	0.835605	0.952367	1.95398	0.966415	0.0242529	0.763427	up	no
MSTRG.21092	WDR90	ENSSSCT00000023121	GO:0005515(protein binding);GO:0005814(centriole);GO:0060271(cilium assembly)	NA	NA	NA	WD repeat domain 90 [Source:NCBI gene;Acc:100519302]	protein_coding	1.17393	0.489316	0.738766	0.787137	0.561626	0.975893	1.7273	0.669521	1.15054	3.73208	0.454346	-1.13814	0.0245541	0.768517	down	yes
MSTRG.11549	TACR2	ENSSSCT00000011224	GO:0004930(G protein-coupled receptor activity);GO:0004995(tachykinin receptor activity);GO:0005886(plasma membrane);GO:0007165(signal transduction);GO:0007186(G protein-coupled receptor signaling pathway);GO:0007217(tachykinin receptor signaling pathway);GO:0016020(membrane);GO:0016021(integral component of membrane);GO:0016497(substance K receptor activity);GO:0036126(sperm flagellum);GO:006182…	04020(Calcium signaling pathway);04080(Neuroactive ligand-receptor interaction)	K04223	NA	tachykinin receptor 2 [Source:NCBI gene;Acc:100151877]	protein_coding	0.32936	0.161856	0.25119	0.299593	0.442804	0.317106	2.78189	0.307288	0.280311	0.486797	0.355778	-1.49095	0.0245932	0.768517	down	yes
MSTRG.27718	ENSSSCG00000037976	ENSSSCT00000051859	GO:0003676(nucleic acid binding);GO:0005622(intracellular);GO:0006355(regulation of transcription, DNA-templated);GO:0046872(metal ion binding)	NA	NA	NA		protein_coding	1.32138	1.59452	3.5273	1.8221	2.42115	4.15211	4.39644	4.28896	4.74183	2.08263	0.543509	-0.879624	0.024626	0.768517	down	no
MSTRG.6218	CBX1;SKAP1	ENSSSCT00000019083;ENSSSCT00000061999;ENSSSCT00000026544;ENSSSCT00000019081;ENSSSCT00000049911	GO:0000775(chromosome, centromeric region);GO:0000784(nuclear chromosome, telomeric region);GO:0000785(chromatin);GO:0001939(female pronucleus);GO:0001940(male pronucleus);GO:0005634(nucleus);GO:0005721(pericentric heterochromatin);GO:0005819(spindle);GO:0006974(cellular response to DNA damage stimulus);GO:0010369(chromocenter);GO:0019899(enzyme binding);GO:0042802(identical protein binding);GO:0…	04015(Rap1 signaling pathway);04015(Rap1 signaling pathway)	K11585;K17699	NA	chromobox 1 [Source:NCBI gene;Acc:100520403];src kinase associated phosphoprotein 1 [Source:NCBI gene;Acc:100521471]	protein_coding	1.10439	3.82646	1.0683	0.938584	1.01782	4.47697	1.01226	4.17047	4.14413	3.43381	0.461522	-1.11553	0.0247549	0.770274	down	yes
ENSSSCG00000007501	BMP7	ENSSSCT00000008212;ENSSSCT00000033617	GO:0001654(eye development);GO:0001656(metanephros development);GO:0001657(ureteric bud development);GO:0001707(mesoderm formation);GO:0001822(kidney development);GO:0001823(mesonephros development);GO:0003272(endocardial cushion formation);GO:0003344(pericardium morphogenesis);GO:0005125(cytokine activity);GO:0005160(transforming growth factor beta receptor binding);GO:0005576(extracellular regi…	04060(Cytokine-cytokine receptor interaction);04350(TGF-beta signaling pathway);04360(Axon guidance);04390(Hippo signaling pathway);04390(Hippo signaling pathway)	K16621	NA	bone morphogenetic protein 7 [Source:NCBI gene;Acc:492315]	protein_coding	0.012274	0.050755	0.221119	0.126053	0.025617	0.14416	0.443788	0.013821	0.150403	1.00932	0.247414	-2.015	0.025338	0.783505	down	yes
MSTRG.19548	CHSY3	ENSSSCT00000045642;ENSSSCT00000057979;ENSSSCT00000048441;ENSSSCT00000061875	GO:0005794(Golgi apparatus);GO:0008376(acetylgalactosaminyltransferase activity);GO:0016740(transferase activity);GO:0032580(Golgi cisterna membrane);GO:0032580(Golgi cisterna membrane)	00532(Glycosaminoglycan biosynthesis - chondroitin sulfate / dermatan sulfate);00532(Glycosaminoglycan biosynthesis - chondroitin sulfate / dermatan sulfate)	K13499	2.4.1.226;EC:2.4.1.175	chondroitin sulfate synthase 3 [Source:NCBI gene;Acc:100518720]	protein_coding	9.30654	8.39698	4.08204	3.18586	7.00199	2.86037	1.46891	4.84789	5.99643	1.99092	1.86276	0.897443	0.0254616	0.785459	up	no
MSTRG.16678	SLC13A1;IQUB	ENSSSCT00000054622;ENSSSCT00000065469;ENSSSCT00000044703;ENSSSCT00000018081;ENSSSCT00000018083	GO:0005215(transporter activity);GO:0006814(sodium ion transport);GO:0006835(dicarboxylic acid transport);GO:0008271(secondary active sulfate transmembrane transporter activity);GO:0008272(sulfate transport);GO:0015137(citrate transmembrane transporter activity);GO:0015141(succinate transmembrane transporter activity);GO:0015382(sodium:sulfate symporter activity);GO:0015746(citrate transport);GO:…	NA	K14444	NA	solute carrier family 13 member 1 [Source:NCBI gene;Acc:100513574];IQ motif and ubiquitin domain containing [Source:NCBI gene;Acc:100513386]	protein_coding	1.36946	0.648356	0.540576	0.410494	0.411522	0.522397	4.0692	0.796144	0.602185	2.5579	0.39547	-1.33836	0.0254618	0.785459	down	yes
MSTRG.1205	STARD6	ENSSSCT00000005004	GO:0008289(lipid binding)	NA	NA	NA	StAR related lipid transfer domain containing 6 [Source:NCBI gene;Acc:100157201]	protein_coding	0.233626	0.135068	0.186535	0.629147	0.219185	0.169664	5.0637	0.125387	0.204195	0.143988	0.24594	-2.02362	0.0255678	0.786527	down	yes
ENSSSCG00000014982	MMP7	ENSSSCT00000016344	GO:0004222(metalloendopeptidase activity);GO:0005615(extracellular space);GO:0006508(proteolysis);GO:0008233(peptidase activity);GO:0008237(metallopeptidase activity);GO:0008270(zinc ion binding);GO:0016787(hydrolase activity);GO:0030198(extracellular matrix organization);GO:0030574(collagen catabolic process);GO:0031012(extracellular matrix);GO:0046872(metal ion binding)	04310(Wnt signaling pathway);05166(Human T-cell leukemia virus 1 infection)	K01397	EC:3.4.24.23	matrix metallopeptidase 7 [Source:NCBI gene;Acc:397411]	protein_coding	0.036684	0.022182	0.088516	0.121306	0.0001	0.022489	1.1742	0.0001	0.008589	0.788087	0.134835	-2.89074	0.0256421	0.787185	down	yes
MSTRG.11457	RTKN2	ENSSSCT00000038387;ENSSSCT00000037217	GO:0005634(nucleus);GO:0005737(cytoplasm);GO:0005886(plasma membrane);GO:0007165(signal transduction);GO:0008284(positive regulation of cell population proliferation);GO:0030097(hemopoiesis);GO:0051092(positive regulation of NF-kappaB transcription factor activity);GO:1901224(positive regulation of NIK/NF-kappaB signaling);GO:2001243(negative regulation of intrinsic apoptotic signaling pathway);G…	NA	NA	NA	rhotekin 2 [Source:NCBI gene;Acc:100157770]	protein_coding	1.34526	1.63598	0.680874	0.736744	1.10498	3.07635	2.74184	1.86903	2.69145	0.719167	0.495938	-1.01177	0.025694	0.787284	down	yes
MSTRG.6993	ZMYND15	ENSSSCT00000019504	GO:0005634(nucleus);GO:0005737(cytoplasm);GO:0007286(spermatid development);GO:0042826(histone deacetylase binding);GO:0045892(negative regulation of transcription, DNA-templated);GO:0046872(metal ion binding)	NA	NA	NA	zinc finger MYND-type containing 15 [Source:NCBI gene;Acc:100513818]	protein_coding	0.127554	0.279082	0.341637	0.884905	0.235903	0.524169	1.98062	0.263107	0.50574	1.5958	0.38384	-1.38142	0.0257246	0.787284	down	yes
MSTRG.18524	EPOR	ENSSSCT00000014873	GO:0004888(transmembrane signaling receptor activity);GO:0004896(cytokine receptor activity);GO:0004900(erythropoietin receptor activity);GO:0005515(protein binding);GO:0007165(signal transduction);GO:0007420(brain development);GO:0007507(heart development);GO:0016020(membrane);GO:0016021(integral component of membrane);GO:0019221(cytokine-mediated signaling pathway);GO:0038162(erythropoietin-med…	04060(Cytokine-cytokine receptor interaction);04151(PI3K-Akt signaling pathway);04630(Jak-STAT signaling pathway);04640(Hematopoietic cell lineage);05200(Pathways in cancer)	K05079	NA	erythropoietin receptor [Source:NCBI gene;Acc:397554]	protein_coding	0.107695	0.203796	0.018581	0.157371	0.043282	0.41693	0.622236	0.136663	0.356445	0.084069	0.328349	-1.6067	0.0259619	0.793731	down	yes
MSTRG.23358	DPT	ENSSSCT00000060107	GO:0008285(negative regulation of cell population proliferation);GO:0030199(collagen fibril organization)	NA	NA	NA	dermatopontin [Source:NCBI gene;Acc:100516366]	protein_coding	1.49761	4.43227	1.28293	2.94836	4.01677	3.55672	1.93167	2.49539	2.56027	30.0672	0.349114	-1.51823	0.0259932	0.793871	down	yes
ENSSSCG00000035998	C4orf54	ENSSSCT00000061743	NA	NA	NA	NA	chromosome 8 C4orf54 homolog [Source:NCBI gene;Acc:102162205]	protein_coding	0.038242	0.0001	0.00751	0.007037	0.0001	0.0001	0.191043	0.0001	0.003297	0.444434	0.0829283	-3.59199	0.0260689	0.795369	down	yes
MSTRG.32267	STK32B	ENSSSCT00000059237	GO:0000166(nucleotide binding);GO:0004672(protein kinase activity);GO:0004674(protein serine/threonine kinase activity);GO:0005524(ATP binding);GO:0006468(protein phosphorylation)	NA	K08793	EC:2.7.11.1	serine/threonine kinase 32B [Source:NCBI gene;Acc:100628152]	protein_coding	0.232556	0.205165	0.233027	0.395169	0.139003	1.15407	0.0001	1.45366	0.060168	2.87285	0.217461	-2.20117	0.026111	0.795836	down	yes
MSTRG.3153	TNC	ENSSSCT00000023943;ENSSSCT00000041382;ENSSSCT00000037131;ENSSSCT00000026819;ENSSSCT00000062234;ENSSSCT00000036896;ENSSSCT00000037550;ENSSSCT00000032138;ENSSSCT00000058254;ENSSSCT00000006041	GO:0003674(molecular_function);GO:0005515(protein binding);GO:0005576(extracellular region);GO:0005604(basement membrane);GO:0005614(interstitial matrix);GO:0007155(cell adhesion);GO:0007528(neuromuscular junction development);GO:0008150(biological_process);GO:0008284(positive regulation of cell population proliferation);GO:0009611(response to wounding);GO:0010628(positive regulation of gene expr…	04151(PI3K-Akt signaling pathway);04510(Focal adhesion);04512(ECM-receptor interaction);05165(Human papillomavirus infection);05206(MicroRNAs in cancer);05206(MicroRNAs in cancer)	K06252	NA	tenascin C [Source:NCBI gene;Acc:397460]	protein_coding	0.94541	2.27437	1.25286	1.76182	2.84463	0.830504	0.88165	0.647123	0.646718	33.7471	0.247029	-2.01725	0.0262056	0.797717	down	yes
MSTRG.4880	TEX26	ENSSSCT00000010226	GO:0005737(cytoplasm)	NA	NA	NA	testis expressed 26 [Source:NCBI gene;Acc:100516873]	protein_coding	0.95842	0.149229	0.346016	0.516393	0.608138	0.052399	8.5577	0.099819	0.182811	3.46222	0.208677	-2.26065	0.0263235	0.799858	down	yes
MSTRG.25972	ENSSSCG00000032624	ENSSSCT00000065318	NA	NA	NA	NA		protein_coding	4.14843	3.88386	8.69659	7.59908	7.42075	3.04776	1.89841	7.374	3.17262	1.66788	1.85009	0.887592	0.0264524	0.802957	up	no
MSTRG.2581	GLDC	ENSSSCT00000005731	GO:0003824(catalytic activity);GO:0004375(glycine dehydrogenase (decarboxylating) activity);GO:0005634(nucleus);GO:0005739(mitochondrion);GO:0005886(plasma membrane);GO:0005960(glycine cleavage complex);GO:0006520(cellular amino acid metabolic process);GO:0006544(glycine metabolic process);GO:0006546(glycine catabolic process);GO:0016491(oxidoreductase activity);GO:0016594(glycine binding);GO:001…	00260(Glycine, serine and threonine metabolism);00630(Glyoxylate and dicarboxylate metabolism)	K00281	EC:1.4.4.2	glycine decarboxylase [Source:NCBI gene;Acc:100155425]	protein_coding	2.96371	0.934761	0.469179	0.832763	0.785818	1.18075	15.9239	0.722918	1.02628	0.92043	0.302728	-1.72391	0.0264908	0.803114	down	yes
ENSSSCG00000003572	SYTL1	ENSSSCT00000003966;ENSSSCT00000056717	GO:0005886(plasma membrane);GO:0006886(intracellular protein transport);GO:0006887(exocytosis);GO:0017137(Rab GTPase binding);GO:0070382(exocytic vesicle);GO:0070382(exocytic vesicle)	NA	K17598	NA	synaptotagmin like 1 [Source:NCBI gene;Acc:100511935]	protein_coding	0.0453361	0.0109193	0.225144	0.0748152	0.104279	0.210482	0.24216	0.151693	0.189012	0.545142	0.34404	-1.53935	0.0265131	0.803114	down	yes
MSTRG.30839	TMED3	ENSSSCT00000001988	GO:0005783(endoplasmic reticulum);GO:0005793(endoplasmic reticulum-Golgi intermediate compartment);GO:0005794(Golgi apparatus);GO:0016020(membrane);GO:0016021(integral component of membrane)	NA	K20350	NA	transmembrane p24 trafficking protein 3 [Source:NCBI gene;Acc:100155219]	protein_coding	17.7738	6.20795	2.48858	8.79651	7.66261	5.74836	121.189	4.23559	5.984	7.31116	0.297155	-1.75071	0.0269034	0.809683	down	yes
ENSSSCG00000016159	CPS1	ENSSSCT00000058996;ENSSSCT00000017594;ENSSSCT00000031099	GO:0000166(nucleotide binding);GO:0004087(carbamoyl-phosphate synthase (ammonia) activity);GO:0004088(carbamoyl-phosphate synthase (glutamine-hydrolyzing) activity);GO:0005524(ATP binding);GO:0005730(nucleolus);GO:0005737(cytoplasm);GO:0005739(mitochondrion);GO:0006207('de novo' pyrimidine nucleobase biosynthetic process);GO:0006526(arginine biosynthetic process);GO:0006541(glutamine metabolic pr…	00220(Arginine biosynthesis);00250(Alanine, aspartate and glutamate metabolism);00910(Nitrogen metabolism);00910(Nitrogen metabolism)	K01948	EC:6.3.4.16	carbamoyl-phosphate synthase 1 [Source:NCBI gene;Acc:100157716]	protein_coding	0.264486	0.0001	0.0001	0.388575	0.0001	0.0001	0.0294733	0.0001	0.0001	0.0001	21.8711	4.45095	0.0269187	0.809683	up	yes
MSTRG.23252	CA8	ENSSSCT00000038512;ENSSSCT00000006830	GO:0004089(carbonate dehydratase activity);GO:0005737(cytoplasm);GO:0008270(zinc ion binding);GO:0046872(metal ion binding);GO:0048015(phosphatidylinositol-mediated signaling);GO:0048015(phosphatidylinositol-mediated signaling)	00910(Nitrogen metabolism);00910(Nitrogen metabolism)	K01672	EC:4.2.1.1	carbonic anhydrase 8 [Source:NCBI gene;Acc:100157869]	protein_coding	0.236882	0.100442	0.165686	0.135079	0.0367411	0.0893429	1.83889	0.115062	0.0230976	0.57189	0.255784	-1.967	0.0270147	0.811749	down	yes
MSTRG.11962	IFIT2	ENSSSCT00000035898	GO:0005515(protein binding);GO:0005737(cytoplasm);GO:0005783(endoplasmic reticulum);GO:0005829(cytosol);GO:0009615(response to virus);GO:0032091(negative regulation of protein binding);GO:0035457(cellular response to interferon-alpha);GO:0043065(positive regulation of apoptotic process);GO:0051607(defense response to virus)	NA	NA	NA	interferon induced protein with tetratricopeptide repeats 2 [Source:NCBI gene;Acc:100155467]	protein_coding	0.767564	0.850006	1.39408	7.93839	1.04566	0.819728	1.35227	0.820832	0.681237	1.17986	2.47134	1.30529	0.0270604	0.812304	up	yes
ENSSSCG00000027160	DSG3	ENSSSCT00000027548	GO:0005509(calcium ion binding);GO:0005886(plasma membrane);GO:0007155(cell adhesion);GO:0007156(homophilic cell adhesion via plasma membrane adhesion molecules);GO:0016020(membrane);GO:0016021(integral component of membrane)	NA	K07598	NA	desmoglein 3 [Source:NCBI gene;Acc:100625733]	protein_coding	0.039884	0.002692	0.024277	0.109847	0.035716	0.06087	0.393308	0.062504	0.0001	0.518069	0.205262	-2.28446	0.0272849	0.817394	down	yes
MSTRG.35496	LAMC2	ENSSSCT00000027563;ENSSSCT00000016946	GO:0005604(basement membrane);GO:0008284(positive regulation of cell population proliferation);GO:0030335(positive regulation of cell migration);GO:0048731(system development);GO:0070831(basement membrane assembly);GO:0070831(basement membrane assembly)	04151(PI3K-Akt signaling pathway);04510(Focal adhesion);04512(ECM-receptor interaction);05145(Toxoplasmosis);05146(Amoebiasis);05165(Human papillomavirus infection);05200(Pathways in cancer);05222(Small cell lung cancer);05222(Small cell lung cancer)	K06246	NA	laminin subunit gamma 2 [Source:NCBI gene;Acc:100624264]	protein_coding	1.03314	1.84804	0.59744	1.69487	1.40931	2.14097	2.44078	0.953034	1.88421	7.03609	0.455396	-1.13481	0.0275241	0.82208	down	yes
MSTRG.24663	C22orf23	ENSSSCT00000000123	NA	NA	NA	NA	chromosome 5 C22orf23 homolog [Source:NCBI gene;Acc:100155721]	protein_coding	0.354877	0.975069	0.551661	1.05282	0.741713	1.20185	1.40836	0.571265	0.819538	4.91702	0.412215	-1.27853	0.0279729	0.832099	down	yes
MSTRG.5389	ENSSSCG00000009500	ENSSSCT00000010417;ENSSSCT00000047953	GO:0005198(structural molecule activity);GO:0005886(plasma membrane);GO:0005923(bicellular tight junction);GO:0016020(membrane);GO:0016021(integral component of membrane);GO:0030054(cell junction);GO:0030054(cell junction)	04514(Cell adhesion molecules (CAMs));04530(Tight junction);04670(Leukocyte transendothelial migration);05160(Hepatitis C);05160(Hepatitis C)	K06087	NA	claudin 10 [Source:NCBI gene;Acc:100153752]	protein_coding	0.363122	0.317771	0.65162	0.687944	0.244471	0.61711	2.89738	0.7549	0.435888	1.07214	0.392032	-1.35096	0.0279993	0.832099	down	yes
ENSSSCG00000004758	RHOV	ENSSSCT00000005257	GO:0000166(nucleotide binding);GO:0003924(GTPase activity);GO:0005525(GTP binding);GO:0005622(intracellular);GO:0005737(cytoplasm);GO:0005886(plasma membrane);GO:0005938(cell cortex);GO:0006897(endocytosis);GO:0007015(actin filament organization);GO:0007163(establishment or maintenance of cell polarity);GO:0007264(small GTPase mediated signal transduction);GO:0007266(Rho protein signal transducti…	NA	K07866	NA	ras homolog family member V [Source:NCBI gene;Acc:100154565]	protein_coding	0.140498	0.263147	0.17964	0.066149	0.081787	0.335265	0.266925	0.147637	0.350106	0.815746	0.381703	-1.38948	0.0281983	0.83551	down	yes
MSTRG.17591	UBE2L6	ENSSSCT00000030523	GO:0000151(ubiquitin ligase complex);GO:0000166(nucleotide binding);GO:0005524(ATP binding);GO:0006511(ubiquitin-dependent protein catabolic process);GO:0016567(protein ubiquitination);GO:0016740(transferase activity);GO:0019787(ubiquitin-like protein transferase activity);GO:0019941(modification-dependent protein catabolic process);GO:0031625(ubiquitin protein ligase binding);GO:0032020(ISG15-pr…	04120(Ubiquitin mediated proteolysis);05012(Parkinson disease)	K04553	EC:2.3.2.23	ubiquitin conjugating enzyme E2 L6 [Source:NCBI gene;Acc:100514753]	protein_coding	6.83344	7.75042	6.89902	41.1528	7.28036	6.35423	7.40616	3.10611	4.67457	9.70049	2.23792	1.16216	0.0283338	0.838692	up	yes
MSTRG.34108	ENSSSCG00000014895;TENM4	ENSSSCT00000052907;ENSSSCT00000016250;ENSSSCT00000016249	GO:0007157(heterophilic cell-cell adhesion via plasma membrane cell adhesion molecules);GO:0007165(signal transduction);GO:0016021(integral component of membrane);GO:0042803(protein homodimerization activity);GO:0043005(neuron projection);GO:0046982(protein heterodimerization activity);GO:0048666(neuron development);GO:0050839(cell adhesion molecule binding);GO:0001702(gastrulation with mouth for…	NA	NA	NA	teneurin transmembrane protein 4 [Source:NCBI gene;Acc:100514784]	protein_coding	2.0082	3.42341	3.05216	2.62202	2.11378	5.08972	7.01158	4.12079	5.50774	1.87646	0.560002	-0.836495	0.028383	0.83877	down	no
ENSSSCG00000023320	CYP3A39	ENSSSCT00000055550;ENSSSCT00000025243;ENSSSCT00000050481;ENSSSCT00000022769;ENSSSCT00000029436;ENSSSCT00000064726;ENSSSCT00000049664;ENSSSCT00000051666;ENSSSCT00000056081;ENSSSCT00000061717	GO:0004497(monooxygenase activity);GO:0005506(iron ion binding);GO:0016020(membrane);GO:0016021(integral component of membrane);GO:0016491(oxidoreductase activity);GO:0016705(oxidoreductase activity, acting on paired donors, with incorporation or reduction of molecular oxygen);GO:0016712(oxidoreductase activity, acting on paired donors, with incorporation or reduction of molecular oxygen, reduced…	00140(Steroid hormone biosynthesis);00591(Linoleic acid metabolism);00830(Retinol metabolism);05204(Chemical carcinogenesis);05204(Chemical carcinogenesis)	K07424	EC:1.14.14.1	Sus scrofa cytochrome P450 3A39 (CYP3A39), mRNA. [Source:RefSeq mRNA;Acc:NM_214422]	protein_coding	0.0965455	0.0687768	0.0148395	0.0762995	0.137838	0.251994	0.32313	0.277988	0.031197	0.180184	0.370411	-1.4328	0.0285757	0.840349	down	yes
ENSSSCG00000032849	MLPH	ENSSSCT00000062714;ENSSSCT00000052489;ENSSSCT00000060426	GO:0005623(cell);GO:0006886(intracellular protein transport);GO:0017022(myosin binding);GO:0017137(Rab GTPase binding);GO:0030425(dendrite);GO:0030674(protein binding, bridging);GO:0046872(metal ion binding);GO:0048471(perinuclear region of cytoplasm);GO:0048471(perinuclear region of cytoplasm)	NA	K22235	NA	melanophilin [Source:NCBI gene;Acc:100049680]	protein_coding	0.0517423	0.0001	0.0326975	0.116799	0.065515	0.0417028	0.0747008	0.0218926	0.200972	0.884623	0.218038	-2.19735	0.0286626	0.840349	down	yes
MSTRG.25474	GPRC5A	ENSSSCT00000064063;ENSSSCT00000030979;ENSSSCT00000036766	GO:0004930(G protein-coupled receptor activity);GO:0005730(nucleolus);GO:0005886(plasma membrane);GO:0007175(negative regulation of epidermal growth factor-activated receptor activity);GO:0007186(G protein-coupled receptor signaling pathway);GO:0016020(membrane);GO:0016021(integral component of membrane);GO:0030295(protein kinase activator activity);GO:0031982(vesicle);GO:0032147(activation of pr…	NA	K08468	NA	G protein-coupled receptor class C group 5 member A [Source:NCBI gene;Acc:100624186]	protein_coding	0.970187	0.708124	1.70819	1.02603	2.03413	0.280534	0.168594	0.462241	1.05105	0.925097	2.2326	1.15873	0.0287175	0.840489	up	yes
MSTRG.12749	ZEB2;ENSSSCG00000036912	ENSSSCT00000053056;ENSSSCT00000061130;ENSSSCT00000042830;ENSSSCT00000039914;ENSSSCT00000027524;ENSSSCT00000053889;ENSSSCT00000046273;ENSSSCT00000051332;ENSSSCT00000065884	GO:0000122(negative regulation of transcription by RNA polymerase II);GO:0000790(nuclear chromatin);GO:0001227(DNA-binding transcription repressor activity, RNA polymerase II-specific);GO:0001228(DNA-binding transcription activator activity, RNA polymerase II-specific);GO:0001755(neural crest cell migration);GO:0001756(somitogenesis);GO:0001843(neural tube closure);GO:0003676(nucleic acid binding…	05206(MicroRNAs in cancer);05206(MicroRNAs in cancer)	K09299	NA	zinc finger E-box binding homeobox 2 [Source:NCBI gene;Acc:100739669]	protein_coding	8.92005	5.0859	3.49473	5.06385	5.48967	2.71379	3.68421	4.73698	3.11669	2.78507	1.64669	0.719569	0.0290119	0.844353	up	no
ENSSSCG00000039419	SLCO4A1	ENSSSCT00000045230;ENSSSCT00000060620;ENSSSCT00000056350	GO:0005215(transporter activity);GO:0005515(protein binding);GO:0005886(plasma membrane);GO:0006811(ion transport);GO:0016020(membrane);GO:0016021(integral component of membrane);GO:0055085(transmembrane transport);GO:0055085(transmembrane transport)	NA	K14354	NA	solute carrier organic anion transporter family member 4A1 [Source:NCBI gene;Acc:110257486]	protein_coding	0.361359	0.0513634	0.275822	0.173975	0.351071	0.0453415	0.0270477	0.0147109	0.0751599	0.235991	3.0473	1.60753	0.0290355	0.844353	up	yes
MSTRG.36058	CFP	ENSSSCT00000013427;ENSSSCT00000036027	NA	05168(Herpes simplex virus 1 infection);05168(Herpes simplex virus 1 infection)	K15412	NA	complement factor properdin [Source:NCBI gene;Acc:100522293]	protein_coding	0.261303	0.351516	0.619835	0.846972	0.241943	0.393276	2.94677	0.387941	0.440836	1.73746	0.393068	-1.34715	0.0291084	0.845351	down	yes
MSTRG.9279	FGF12	ENSSSCT00000054036;ENSSSCT00000052052	GO:0005634(nucleus);GO:0007268(chemical synaptic transmission);GO:0008083(growth factor activity);GO:0008344(adult locomotory behavior);GO:0008543(fibroblast growth factor receptor signaling pathway);GO:0010469(regulation of signaling receptor activity);GO:0010765(positive regulation of sodium ion transport);GO:0050905(neuromuscular process);GO:0098908(regulation of neuronal action potential);GO:…	NA	K22413	NA	fibroblast growth factor 12 [Source:NCBI gene;Acc:100152498]	protein_coding	2.08958	2.83081	2.79094	0.788378	4.80658	1.27926	1.21569	0.691628	2.67406	1.09602	1.91274	0.935641	0.0291265	0.845351	up	no
MSTRG.9243	LPP	ENSSSCT00000023546;ENSSSCT00000050107;ENSSSCT00000012923;ENSSSCT00000060974	GO:0005829(cytosol);GO:0005925(focal adhesion);GO:0046872(metal ion binding);GO:0046872(metal ion binding)	NA	NA	NA	LIM domain containing preferred translocation partner in lipoma [Source:NCBI gene;Acc:100626969]	protein_coding	10.2169	6.08326	5.82905	5.75025	15.938	3.90976	2.5124	5.24262	6.7162	6.63079	1.75187	0.808898	0.0291977	0.846592	up	no
ENSSSCG00000040146	ENSSSCG00000040146	ENSSSCT00000065323	GO:0004252(serine-type endopeptidase activity);GO:0006508(proteolysis)	NA	NA	NA	serine protease 45 [Source:NCBI gene;Acc:100515578]	protein_coding	0.047849	0.046833	0.088233	0.051413	0.223461	0.285971	0.017276	0.054326	0.933212	0.397315	0.271186	-1.88265	0.0292371	0.846908	down	yes
MSTRG.35418	NPHS2	ENSSSCT00000016914	GO:0005886(plasma membrane);GO:0005887(integral component of plasma membrane);GO:0005911(cell-cell junction);GO:0007588(excretion);GO:0016020(membrane);GO:0016021(integral component of membrane);GO:0031235(intrinsic component of the cytoplasmic side of the plasma membrane);GO:0031532(actin cytoskeleton reorganization);GO:0032991(protein-containing complex);GO:0036057(slit diaphragm);GO:0045121(me…	NA	K18268	NA	NPHS2, podocin [Source:NCBI gene;Acc:100523986]	protein_coding	2.20591	1.21191	1.0263	2.47336	3.00772	0.623019	0.68012	0.905801	1.39976	1.14682	2.08709	1.06149	0.029278	0.84727	up	yes
MSTRG.16891	ADCYAP1R1	ENSSSCT00000018151;ENSSSCT00000045375;ENSSSCT00000030340;ENSSSCT00000042049	GO:0004888(transmembrane signaling receptor activity);GO:0004930(G protein-coupled receptor activity);GO:0004999(vasoactive intestinal polypeptide receptor activity);GO:0007165(signal transduction);GO:0007166(cell surface receptor signaling pathway);GO:0007186(G protein-coupled receptor signaling pathway);GO:0008528(G protein-coupled peptide receptor activity);GO:0016020(membrane);GO:0016021(inte…	04024(cAMP signaling pathway);04080(Neuroactive ligand-receptor interaction);04713(Circadian entrainment);04911(Insulin secretion);04924(Renin secretion);04924(Renin secretion)	K04587	NA	ADCYAP receptor type I [Source:NCBI gene;Acc:100511793]	protein_coding	0.235093	0.841973	0.660605	0.386333	0.543864	1.84862	0.241221	2.48992	0.839178	0.989065	0.416333	-1.26419	0.0293491	0.847679	down	yes
MSTRG.16126	RBM38	ENSSSCT00000008216	GO:0003676(nucleic acid binding);GO:0003723(RNA binding);GO:0003729(mRNA binding);GO:0003730(mRNA 3'-UTR binding);GO:0005829(cytosol);GO:0006397(mRNA processing);GO:0010830(regulation of myotube differentiation);GO:0043484(regulation of RNA splicing);GO:0070935(3'-UTR-mediated mRNA stabilization);GO:1990904(ribonucleoprotein complex)	NA	NA	NA	RNA binding motif protein 38 [Source:NCBI gene;Acc:100125973]	protein_coding	0.698462	0.750566	0.655379	0.534456	0.757571	1.84062	0.742316	1.1848	0.832983	2.61845	0.470474	-1.08781	0.0293907	0.847796	down	yes
MSTRG.20898	PPL	ENSSSCT00000008688	GO:0005198(structural molecule activity);GO:0005737(cytoplasm);GO:0005856(cytoskeleton);GO:0005882(intermediate filament);GO:0009612(response to mechanical stimulus);GO:0016020(membrane);GO:0042060(wound healing);GO:0045104(intermediate filament cytoskeleton organization)	NA	K10386	NA	periplakin [Source:NCBI gene;Acc:100512773]	protein_coding	0.223917	0.450523	0.67713	0.562605	0.367303	0.732718	0.92518	0.370729	0.413287	3.01906	0.417778	-1.25919	0.0294483	0.848077	down	yes
MSTRG.16343	TMEM139	ENSSSCT00000060000;ENSSSCT00000049940	GO:0016020(membrane);GO:0016021(integral component of membrane);GO:0016021(integral component of membrane)	NA	NA	NA	transmembrane protein 139 [Source:NCBI gene;Acc:100521303]	protein_coding	0.122633	0.168144	0.150294	0.160244	0.121343	0.391129	0.096797	0.323655	0.350191	0.462705	0.444856	-1.16859	0.0294997	0.848713	down	yes
MSTRG.11948	ENSSSCG00000040834	ENSSSCT00000048500;ENSSSCT00000042528;ENSSSCT00000062971;ENSSSCT00000037446;ENSSSCT00000062983	GO:0016020(membrane);GO:0016021(integral component of membrane);GO:0016021(integral component of membrane)	NA	NA	NA		protein_coding	3.23827	3.38421	2.32705	5.3635	2.07396	6.86656	7.35978	9.32717	4.41406	2.50264	0.537804	-0.894848	0.0295618	0.848713	down	no
ENSSSCG00000029131	KCNU1	ENSSSCT00000042233;ENSSSCT00000044994;ENSSSCT00000029952	GO:0005216(ion channel activity);GO:0005886(plasma membrane);GO:0006811(ion transport);GO:0006813(potassium ion transport);GO:0015271(outward rectifier potassium channel activity);GO:0016020(membrane);GO:0016021(integral component of membrane);GO:0022414(reproductive process);GO:0034220(ion transmembrane transport);GO:0042391(regulation of membrane potential);GO:0055085(transmembrane transport);G…	04022(cGMP-PKG signaling pathway);04270(Vascular smooth muscle contraction);04911(Insulin secretion);04911(Insulin secretion)	K05274	NA	potassium calcium-activated channel subfamily U member 1 [Source:NCBI gene;Acc:100521933]	protein_coding	0.0310545	0.0508708	0.0001	0.0724138	0.0614634	0.294817	0.0233695	0.0474123	0.324871	0.103078	0.272072	-1.87794	0.0296414	0.848713	down	yes
MSTRG.29110	MCOLN2	ENSSSCT00000044279;ENSSSCT00000038535;ENSSSCT00000004157;ENSSSCT00000044350;ENSSSCT00000045901	GO:0005261(cation channel activity);GO:0016020(membrane);GO:0016021(integral component of membrane);GO:0032722(positive regulation of chemokine production);GO:0034220(ion transmembrane transport);GO:0035926(chemokine (C-C motif) ligand 2 secretion);GO:0051209(release of sequestered calcium ion into cytosol);GO:0051259(protein complex oligomerization);GO:0055037(recycling endosome);GO:0071639(posi…	NA	K04993	NA	mucolipin 2 [Source:NCBI gene;Acc:100522324]	protein_coding	0.149947	0.198541	0.12894	0.247118	0.207455	0.194481	0.90182	0.215057	0.0979862	0.988775	0.388638	-1.3635	0.0296939	0.849374	down	yes
MSTRG.22848	GRHL2	ENSSSCT00000006649;ENSSSCT00000059239	GO:0001161(intronic transcription regulatory region sequence-specific DNA binding);GO:0001228(DNA-binding transcription activator activity, RNA polymerase II-specific);GO:0001701(in utero embryonic development);GO:0001843(neural tube closure);GO:0003208(cardiac ventricle morphogenesis);GO:0003382(epithelial cell morphogenesis);GO:0003677(DNA binding);GO:0003682(chromatin binding);GO:0003700(DNA-b…	NA	K09275	NA	grainyhead like transcription factor 2 [Source:NCBI gene;Acc:100525287]	protein_coding	0.447619	0.45405	0.378114	0.380335	0.693095	0.427926	1.54363	0.222983	0.657175	2.94982	0.405619	-1.3018	0.0298126	0.851159	down	yes
MSTRG.13089	PDLIM3	ENSSSCT00000017199;ENSSSCT00000026298;ENSSSCT00000022266	GO:0005515(protein binding);GO:0005737(cytoplasm);GO:0007015(actin filament organization);GO:0007507(heart development);GO:0008092(cytoskeletal protein binding);GO:0008307(structural constituent of muscle);GO:0015629(actin cytoskeleton);GO:0030018(Z disc);GO:0046872(metal ion binding);GO:0046872(metal ion binding)	NA	NA	NA	PDZ and LIM domain 3 [Source:NCBI gene;Acc:414421]	protein_coding	0.473905	1.46251	1.87819	0.930141	1.2558	1.21622	4.29769	1.22089	0.513001	7.22923	0.414488	-1.2706	0.0301273	0.855451	down	yes
MSTRG.25635	PLEKHG6	ENSSSCT00000060629;ENSSSCT00000052051;ENSSSCT00000000772;ENSSSCT00000059928	GO:0005089(Rho guanyl-nucleotide exchange factor activity);GO:0005515(protein binding);GO:0005813(centrosome);GO:0030054(cell junction);GO:0035023(regulation of Rho protein signal transduction);GO:0035023(regulation of Rho protein signal transduction)	NA	NA	NA	pleckstrin homology and RhoGEF domain containing G6 [Source:NCBI gene;Acc:100520565]	protein_coding	0.0001	0.0001	0.00986056	0.0001	0.0391938	0.0001	0.375274	0.0001	0.0001	0.450763	0.0597267	-4.06548	0.0302952	0.855451	down	yes
MSTRG.34342	ACAT1	ENSSSCT00000037844;ENSSSCT00000028484	GO:0003824(catalytic activity);GO:0003985(acetyl-CoA C-acetyltransferase activity);GO:0003988(acetyl-CoA C-acyltransferase activity);GO:0005739(mitochondrion);GO:0006085(acetyl-CoA biosynthetic process);GO:0006550(isoleucine catabolic process);GO:0006635(fatty acid beta-oxidation);GO:0015936(coenzyme A metabolic process);GO:0015937(coenzyme A biosynthetic process);GO:0016453(C-acetyltransferase a…	00071(Fatty acid degradation);00072(Synthesis and degradation of ketone bodies);00280(Valine, leucine and isoleucine degradation);00310(Lysine degradation);00380(Tryptophan metabolism);00620(Pyruvate metabolism);00630(Glyoxylate and dicarboxylate metabolism);00640(Propanoate metabolism);00650(Butanoate metabolism);00900(Terpenoid backbone biosynthesis);00900(Terpenoid backbone biosynthesis)	K00626	EC:2.3.1.9	acetyl-CoA acetyltransferase 1 [Source:NCBI gene;Acc:100626793]	protein_coding	4.41889	5.22831	4.04582	4.04972	3.4943	5.49266	25.8001	4.82911	4.86474	3.49758	0.477407	-1.06671	0.0304243	0.857119	down	yes
MSTRG.14929	WWC1	ENSSSCT00000058669	GO:0000122(negative regulation of transcription by RNA polymerase II);GO:0003713(transcription coactivator activity);GO:0005515(protein binding);GO:0005634(nucleus);GO:0005737(cytoplasm);GO:0005829(cytosol);GO:0016477(cell migration);GO:0019900(kinase binding);GO:0032587(ruffle membrane);GO:0032947(protein-containing complex scaffold activity);GO:0035330(regulation of hippo signaling);GO:0035331(…	04390(Hippo signaling pathway);04392(Hippo signaling pathway - multiple species)	K16685	NA	WW and C2 domain containing 1 [Source:NCBI gene;Acc:100513827]	protein_coding	0.58618	0.220707	0.746932	0.776009	0.57101	0.757924	1.8948	0.358752	0.46672	3.9545	0.390281	-1.35742	0.0305368	0.859474	down	yes
MSTRG.4433	ENKUR	ENSSSCT00000045451	GO:0001669(acrosomal vesicle);GO:0005516(calmodulin binding);GO:0097228(sperm principal piece)	NA	NA	NA	enkurin, TRPC channel interacting protein [Source:NCBI gene;Acc:100738267]	protein_coding	1.95624	2.23665	2.13972	1.80447	1.80441	2.89214	5.95458	1.95362	2.20014	6.23532	0.516822	-0.952261	0.0309931	0.867398	down	no
MSTRG.7247	DRC3	ENSSSCT00000051175;ENSSSCT00000046987;ENSSSCT00000063054	GO:0005515(protein binding);GO:0005737(cytoplasm);GO:0005930(axoneme);GO:0005930(axoneme)	NA	NA	NA	dynein regulatory complex subunit 3 [Source:NCBI gene;Acc:110256133]	protein_coding	1.08994	1.19811	1.16763	1.39723	0.596991	1.2511	2.73166	1.27779	1.48294	4.196	0.498186	-1.00524	0.0314428	0.879158	down	yes
MSTRG.6289	MYCBPAP	ENSSSCT00000053265;ENSSSCT00000019118;ENSSSCT00000040135	NA	NA	NA	NA	MYCBP associated protein [Source:NCBI gene;Acc:100513622]	protein_coding	1.07329	1.23228	0.671247	0.961287	1.11115	1.46896	1.92402	1.70817	1.74593	2.49005	0.540772	-0.886909	0.0318768	0.8863	down	no
MSTRG.13678	C2orf88	ENSSSCT00000043974	GO:0034237(protein kinase A regulatory subunit binding)	NA	NA	NA	chromosome 15 C2orf88 homolog [Source:NCBI gene;Acc:106506310]	protein_coding	2.1026	6.04254	1.8545	3.17729	0.429776	6.26058	6.65261	8.35169	4.89984	3.83274	0.453595	-1.14052	0.0320738	0.890116	down	yes
MSTRG.18830	FSTL3	ENSSSCT00000057531;ENSSSCT00000054641	GO:0001968(fibronectin binding);GO:0002244(hematopoietic progenitor cell differentiation);GO:0005515(protein binding);GO:0005615(extracellular space);GO:0005634(nucleus);GO:0005654(nucleoplasm);GO:0006357(regulation of transcription by RNA polymerase II);GO:0022409(positive regulation of cell-cell adhesion);GO:0030514(negative regulation of BMP signaling pathway);GO:0032926(negative regulation of…	NA	NA	NA	follistatin like 3 [Source:NCBI gene;Acc:102164292]	protein_coding	23.6964	4.88943	6.15064	7.28691	10.6408	5.14798	4.07671	5.04787	5.14015	9.01153	1.85279	0.8897	0.0323227	0.893319	up	no
MSTRG.23677	S100A2	ENSSSCT00000036193	GO:0005509(calcium ion binding);GO:0042802(identical protein binding);GO:0043542(endothelial cell migration);GO:0046872(metal ion binding);GO:0046914(transition metal ion binding)	NA	NA	NA	S100 calcium binding protein A2 [Source:NCBI gene;Acc:100152729]	protein_coding	0.646868	2.41234	1.74381	2.6503	1.69718	0.883364	1.01604	0.107969	0.44931	41.5536	0.207917	-2.26592	0.0324103	0.894453	down	yes
MSTRG.6931	PITPNM3	ENSSSCT00000051348;ENSSSCT00000057129;ENSSSCT00000019469	GO:0004620(phospholipase activity);GO:0005509(calcium ion binding);GO:0006888(endoplasmic reticulum to Golgi vesicle-mediated transport);GO:0030134(COPII-coated ER to Golgi transport vesicle);GO:0030971(receptor tyrosine kinase binding);GO:0046872(metal ion binding);GO:0046872(metal ion binding)	NA	NA	NA	PITPNM family member 3 [Source:NCBI gene;Acc:100524106]	protein_coding	1.11435	0.358241	0.621212	0.679983	0.951464	1.25374	5.30063	1.00601	0.379766	0.926704	0.420132	-1.25108	0.0327101	0.900223	down	yes
MSTRG.15382	TMX4	ENSSSCT00000058858;ENSSSCT00000026729	GO:0005623(cell);GO:0016020(membrane);GO:0016021(integral component of membrane);GO:0045454(cell redox homeostasis);GO:0045454(cell redox homeostasis)	NA	NA	NA	thioredoxin related transmembrane protein 4 [Source:NCBI gene;Acc:100627887]	protein_coding	6.27889	3.0772	3.80873	5.30097	21.1325	21.0478	17.7726	5.49022	17.585	22.3623	0.469965	-1.08938	0.0328034	0.900973	down	yes
MSTRG.34502	SCN4B	ENSSSCT00000025729;ENSSSCT00000060640	GO:0001518(voltage-gated sodium channel complex);GO:0005248(voltage-gated sodium channel activity);GO:0006814(sodium ion transport);GO:0010765(positive regulation of sodium ion transport);GO:0014704(intercalated disc);GO:0016020(membrane);GO:0016021(integral component of membrane);GO:0017080(sodium channel regulator activity);GO:0031226(intrinsic component of plasma membrane);GO:0035725(sodium io…	04261(Adrenergic signaling in cardiomyocytes);04261(Adrenergic signaling in cardiomyocytes)	K04848	NA	sodium voltage-gated channel beta subunit 4 [Source:NCBI gene;Acc:100512800]	protein_coding	0.281055	0.154238	0.200386	0.209024	0.343875	0.239907	0.497041	0.283174	0.297957	1.51492	0.419547	-1.25309	0.0328599	0.900973	down	yes
MSTRG.19545	ADAMTS19	ENSSSCT00000043399;ENSSSCT00000015580	GO:0004222(metalloendopeptidase activity);GO:0006508(proteolysis);GO:0008233(peptidase activity);GO:0008237(metallopeptidase activity);GO:0008237(metallopeptidase activity)	NA	K08633	EC:3.4.24.-	ADAM metallopeptidase with thrombospondin type 1 motif 19 [Source:NCBI gene;Acc:100518181]	protein_coding	0.173041	0.580471	0.625851	0.697802	1.41077	0.0667989	4.10341	1.37013	0.358727	5.00281	0.319939	-1.64413	0.0328616	0.900973	down	yes
MSTRG.22373	ID2	ENSSSCT00000009458;ENSSSCT00000047635	GO:0000122(negative regulation of transcription by RNA polymerase II);GO:0001085(RNA polymerase II transcription factor binding);GO:0001656(metanephros development);GO:0001779(natural killer cell differentiation);GO:0001966(thigmotaxis);GO:0002521(leukocyte differentiation);GO:0003149(membranous septum morphogenesis);GO:0003166(bundle of His development);GO:0003700(DNA-binding transcription facto…	04350(TGF-beta signaling pathway);04390(Hippo signaling pathway);04550(Signaling pathways regulating pluripotency of stem cells);05202(Transcriptional misregulation in cancer);05202(Transcriptional misregulation in cancer)	K17693	NA	inhibitor of DNA binding 2 [Source:NCBI gene;Acc:654298]	protein_coding	4.56399	13.9393	6.73748	5.65423	5.43616	4.37599	4.12702	2.96805	4.73651	4.85527	1.72489	0.786507	0.0330275	0.903073	up	no
MSTRG.33823	ENSSSCG00000014618;ENSSSCG00000031610;ENSSSCG00000033089	ENSSSCT00000063594;ENSSSCT00000060139;ENSSSCT00000056478;ENSSSCT00000050257;ENSSSCT00000055407;ENSSSCT00000044829;ENSSSCT00000015968	GO:0005525(GTP binding);GO:0005525(GTP binding)	NA	NA	NA	interferon-induced very large GTPase 1-like [Source:NCBI gene;Acc:110255361];GTPase, very large interferon inducible 1 [Source:NCBI gene;Acc:100512797];interferon-induced very large GTPase 1-like [Source:NCBI gene;Acc:110255360]	protein_coding	0.770521	0.721233	1.05293	6.76059	1.1273	0.912031	0.852348	0.852944	0.951806	1.20795	2.18388	1.1269	0.0330612	0.903073	up	yes
MSTRG.29710	ENSSSCG00000036909;ENSSSCG00000036471	ENSSSCT00000041323;ENSSSCT00000066160;ENSSSCT00000063043;ENSSSCT00000004352;ENSSSCT00000043553;ENSSSCT00000052438;ENSSSCT00000037476	GO:0000175(3'-5'-exoribonuclease activity);GO:0000467(exonucleolytic trimming to generate mature 3'-end of 5.8S rRNA from tricistronic rRNA transcript (SSU-rRNA, 5.8S rRNA, LSU-rRNA));GO:0000738(DNA catabolic process, exonucleolytic);GO:0003676(nucleic acid binding);GO:0003676(nucleic acid binding)	NA	K18418	EC:3.1.-.-	ERI1 exoribonuclease family member 3 [Source:NCBI gene;Acc:100521097]	protein_coding	4.17463	5.37691	3.61324	3.43359	5.06593	3.4054	2.13856	1.69118	2.35861	3.83988	1.61269	0.689472	0.033062	0.903073	up	no
MSTRG.14443	OSMR	ENSSSCT00000018351	GO:0004896(cytokine receptor activity);GO:0004924(oncostatin-M receptor activity);GO:0005515(protein binding);GO:0005900(oncostatin-M receptor complex);GO:0008284(positive regulation of cell population proliferation);GO:0009897(external side of plasma membrane);GO:0016020(membrane);GO:0016021(integral component of membrane);GO:0016324(apical plasma membrane);GO:0019838(growth factor binding);GO:0…	04060(Cytokine-cytokine receptor interaction);04151(PI3K-Akt signaling pathway);04630(Jak-STAT signaling pathway)	K05057	NA	oncostatin M receptor [Source:NCBI gene;Acc:100519398]	protein_coding	6.73333	1.96075	7.3032	6.70495	10.5011	3.43384	3.36187	3.28125	3.70443	5.17952	1.75114	0.808298	0.033202	0.903073	up	no
MSTRG.29023	DSG2	ENSSSCT00000025628;ENSSSCT00000051217;ENSSSCT00000029235	GO:0002934(desmosome organization);GO:0003165(Purkinje myocyte development);GO:0005509(calcium ion binding);GO:0005886(plasma membrane);GO:0007155(cell adhesion);GO:0007156(homophilic cell adhesion via plasma membrane adhesion molecules);GO:0014704(intercalated disc);GO:0016020(membrane);GO:0016021(integral component of membrane);GO:0030054(cell junction);GO:0030057(desmosome);GO:0043231(intracel…	05412(Arrhythmogenic right ventricular cardiomyopathy (ARVC));05412(Arrhythmogenic right ventricular cardiomyopathy (ARVC))	K07597	NA	desmoglein 2 [Source:NCBI gene;Acc:100625833]	protein_coding	2.03582	2.81046	1.32896	3.17309	1.29836	4.21901	5.40748	2.50857	2.17668	5.4216	0.539528	-0.89023	0.0332123	0.903073	down	no
MSTRG.34678	KCNJ5	ENSSSCT00000027719	GO:0005242(inward rectifier potassium channel activity);GO:0005244(voltage-gated ion channel activity);GO:0006811(ion transport);GO:0006813(potassium ion transport);GO:0008076(voltage-gated potassium channel complex);GO:0015467(G-protein activated inward rectifier potassium channel activity);GO:0016020(membrane);GO:0016021(integral component of membrane);GO:0034765(regulation of ion transmembrane…	04713(Circadian entrainment);04723(Retrograde endocannabinoid signaling);04726(Serotonergic synapse);04728(Dopaminergic synapse);04915(Estrogen signaling pathway);04921(Oxytocin signaling pathway);04925(Aldosterone synthesis and secretion);05032(Morphine addiction)	K04999	NA	potassium voltage-gated channel subfamily J member 5 [Source:NCBI gene;Acc:397448]	protein_coding	0.242808	0.402487	0.733844	0.47366	0.868043	0.595616	3.13104	0.184197	0.653672	2.25344	0.399069	-1.32529	0.033283	0.903073	down	yes
MSTRG.9648	ATP6V1A	ENSSSCT00000039822;ENSSSCT00000013040;ENSSSCT00000042306	GO:0005524(ATP binding);GO:0005774(vacuolar membrane);GO:0005829(cytosol);GO:0005886(plasma membrane);GO:0005902(microvillus);GO:0006879(cellular iron ion homeostasis);GO:0015991(ATP hydrolysis coupled proton transport);GO:0016324(apical plasma membrane);GO:0033180(proton-transporting V-type ATPase, V1 domain);GO:0036295(cellular response to increased oxygen levels);GO:0046034(ATP metabolic proce…	00190(Oxidative phosphorylation);04145(Phagosome);04150(mTOR signaling pathway);04721(Synaptic vesicle cycle);04966(Collecting duct acid secretion);05165(Human papillomavirus infection);05323(Rheumatoid arthritis);05323(Rheumatoid arthritis)	K02145	EC:7.1.2.2	ATPase H+ transporting V1 subunit A [Source:NCBI gene;Acc:445531]	protein_coding	4.32031	4.02396	3.07047	3.12699	4.0702	5.66065	15.6547	4.164	4.11993	4.66777	0.543144	-0.880594	0.0332989	0.903073	down	no
MSTRG.16489	PTN	ENSSSCT00000017990;ENSSSCT00000045414	GO:0001503(ossification);GO:0004864(protein phosphatase inhibitor activity);GO:0005178(integrin binding);GO:0005576(extracellular region);GO:0005615(extracellular space);GO:0005783(endoplasmic reticulum);GO:0005886(plasma membrane);GO:0007229(integrin-mediated signaling pathway);GO:0007406(negative regulation of neuroblast proliferation);GO:0007612(learning);GO:0007613(memory);GO:0008083(growth f…	NA	K16642	NA	pleiotrophin [Source:NCBI gene;Acc:397609]	protein_coding	7.56326	8.27812	7.56447	15.2509	9.11258	8.21841	2.87563	6.3699	7.06821	4.17101	1.66425	0.734876	0.0334665	0.905967	up	no
MSTRG.24080	C1orf194	ENSSSCT00000056295;ENSSSCT00000058691	NA	NA	NA	NA	chromosome 4 C1orf194 homolog [Source:NCBI gene;Acc:100153050]	protein_coding	0.558914	0.384593	0.453819	0.378379	0.52916	1.02911	0.616352	0.663327	0.794404	1.34281	0.518413	-0.947825	0.033856	0.912366	down	no
MSTRG.27249	PPP1R14A	ENSSSCT00000063224	GO:0005737(cytoplasm);GO:0035690(cellular response to drug);GO:0042325(regulation of phosphorylation)	04270(Vascular smooth muscle contraction)	K12328	NA	protein phosphatase 1 regulatory inhibitor subunit 14A [Source:NCBI gene;Acc:397610]	protein_coding	1.11732	1.6283	1.16867	1.84892	1.26487	0.878128	1.48754	0.992485	0.997591	15.7579	0.349419	-1.51697	0.0340583	0.914162	down	yes
MSTRG.18239	ISYNA1	ENSSSCT00000057176;ENSSSCT00000059009;ENSSSCT00000051346	GO:0004512(inositol-3-phosphate synthase activity);GO:0006021(inositol biosynthetic process);GO:0008654(phospholipid biosynthetic process);GO:0008654(phospholipid biosynthetic process)	NA	NA	NA	inositol-3-phosphate synthase 1 [Source:HGNC Symbol;Acc:HGNC:29821]	protein_coding	10.0588	11.928	12.6703	15.0631	14.6198	16.6062	27.347	17.0909	14.9608	30.0552	0.606637	-0.721096	0.0340761	0.914162	down	no
MSTRG.17426	RASGRP2;PYGM	ENSSSCT00000048086;ENSSSCT00000054386;ENSSSCT00000056731;ENSSSCT00000014234;ENSSSCT00000061297;ENSSSCT00000041913;ENSSSCT00000047243;ENSSSCT00000014236	GO:0005085(guanyl-nucleotide exchange factor activity);GO:0005509(calcium ion binding);GO:0005622(intracellular);GO:0005829(cytosol);GO:0005886(plasma membrane);GO:0007264(small GTPase mediated signal transduction);GO:0035556(intracellular signal transduction);GO:0043547(positive regulation of GTPase activity);GO:0046872(metal ion binding);GO:0071277(cellular response to calcium ion);GO:0004645(p…	04010(MAPK signaling pathway);04014(Ras signaling pathway);04015(Rap1 signaling pathway);04062(Chemokine signaling pathway);04611(Platelet activation);05200(Pathways in cancer);00500(Starch and sucrose metabolism);04217(Necroptosis);04910(Insulin signaling pathway);04922(Glucagon signaling pathway);04931(Insulin resistance);05200(Pathways in cancer)	K12361;K00688	EC:2.4.1.1	RAS guanyl releasing protein 2 [Source:NCBI gene;Acc:100626093];glycogen phosphorylase, muscle associated [Source:NCBI gene;Acc:733659]	protein_coding	0.494977	0.962306	0.505445	0.786082	0.924027	0.347963	0.511597	0.40548	0.219237	11.1131	0.291556	-1.77816	0.0342536	0.914211	down	yes
MSTRG.33760	STK33	ENSSSCT00000043100;ENSSSCT00000044895;ENSSSCT00000028526	GO:0000166(nucleotide binding);GO:0004672(protein kinase activity);GO:0004674(protein serine/threonine kinase activity);GO:0005524(ATP binding);GO:0005634(nucleus);GO:0005737(cytoplasm);GO:0006468(protein phosphorylation);GO:0042770(signal transduction in response to DNA damage);GO:0044773(mitotic DNA damage checkpoint);GO:0046777(protein autophosphorylation);GO:0046777(protein autophosphorylatio…	NA	K08813	EC:2.7.11.1	serine/threonine kinase 33 [Source:NCBI gene;Acc:100627286]	protein_coding	0.0808687	0.875009	0.600336	0.364854	0.647556	0.557666	3.02916	0.0581255	0.506149	3.82846	0.3219	-1.63531	0.0345027	0.916225	down	yes
MSTRG.33714	BMP3	ENSSSCT00000031696	GO:0001649(osteoblast differentiation);GO:0005125(cytokine activity);GO:0005160(transforming growth factor beta receptor binding);GO:0005576(extracellular region);GO:0005615(extracellular space);GO:0008083(growth factor activity);GO:0010469(regulation of signaling receptor activity);GO:0010862(positive regulation of pathway-restricted SMAD protein phosphorylation);GO:0042981(regulation of apoptot…	04060(Cytokine-cytokine receptor interaction)	K05496	NA	bone morphogenetic protein 3 [Source:NCBI gene;Acc:100512974]	protein_coding	0.118519	0.177608	0.353537	0.558706	0.284944	0.654838	1.34681	0.279802	0.282564	0.923398	0.428201	-1.22364	0.0346573	0.918171	down	yes
ENSSSCG00000012083	RIPK4	ENSSSCT00000013217	GO:0002009(morphogenesis of an epithelium);GO:0004672(protein kinase activity);GO:0005515(protein binding);GO:0005524(ATP binding);GO:0005737(cytoplasm);GO:0006468(protein phosphorylation);GO:0051092(positive regulation of NF-kappaB transcription factor activity)	NA	K08848	EC:2.7.11.1	receptor interacting serine/threonine kinase 4 [Source:NCBI gene;Acc:100518276]	protein_coding	0.123378	0.175263	0.217654	0.072816	0.100361	0.170852	0.4235	0.101773	0.147523	0.880581	0.399873	-1.32239	0.0347843	0.919899	down	yes
MSTRG.7307	COL6A6	ENSSSCT00000053187	GO:0005576(extracellular region);GO:0031012(extracellular matrix)	NA	NA	NA	collagen type VI alpha 6 chain [Source:HGNC Symbol;Acc:HGNC:27023]	protein_coding	0.0104676	0.732013	0.0597728	0.121469	0.0525608	0.0782248	0.148984	0.0858969	0.221835	4.38992	0.198235	-2.33471	0.0348782	0.921564	down	yes
MSTRG.7102	ENSSSCG00000029441	ENSSSCT00000019597;ENSSSCT00000019596;ENSSSCT00000064728;ENSSSCT00000066146	GO:0000166(nucleotide binding);GO:0001778(plasma membrane repair);GO:0003774(motor activity);GO:0003779(actin binding);GO:0005515(protein binding);GO:0005524(ATP binding);GO:0005794(Golgi apparatus);GO:0005826(actomyosin contractile ring);GO:0005911(cell-cell junction);GO:0014823(response to activity);GO:0016459(myosin complex);GO:0030016(myofibril);GO:0031672(A band);GO:0051015(actin filament bi…	04530(Tight junction);04530(Tight junction)	K10352	NA	myosin, heavy chain 2, skeletal muscle, adult [Source:NCBI gene;Acc:397256]	protein_coding	0.0563459	0.0560204	0.119735	0.246749	0.0332533	0.154617	0.470422	0.0775689	0.146644	0.44877	0.394526	-1.34181	0.0349609	0.92179	down	yes
MSTRG.25228	TRHDE	ENSSSCT00000051182;ENSSSCT00000000555;ENSSSCT00000038470	GO:0004177(aminopeptidase activity);GO:0005737(cytoplasm);GO:0005886(plasma membrane);GO:0006508(proteolysis);GO:0008237(metallopeptidase activity);GO:0008270(zinc ion binding);GO:0016020(membrane);GO:0016021(integral component of membrane);GO:0042277(peptide binding);GO:0043171(peptide catabolic process);GO:0070006(metalloaminopeptidase activity);GO:0070006(metalloaminopeptidase activity)	NA	K01306	EC:3.4.19.6	thyrotropin releasing hormone degrading enzyme [Source:NCBI gene;Acc:100620702]	protein_coding	0.030841	0.741951	0.30418	0.344608	0.076134	0.213229	0.141665	0.059305	0.137117	6.57674	0.210115	-2.25075	0.035194	0.925801	down	yes
MSTRG.28033	CFAP74	ENSSSCT00000026122;ENSSSCT00000030280	NA	NA	NA	NA	cilia and flagella associated protein 74 [Source:NCBI gene;Acc:100623546]	protein_coding	0.317838	1.26543	0.761465	0.973466	0.467457	0.99649	1.06879	0.599209	1.96801	3.59694	0.460014	-1.12025	0.0352264	0.925821	down	yes
MSTRG.35636	IRF6	ENSSSCT00000038517;ENSSSCT00000042607;ENSSSCT00000050800;ENSSSCT00000034737;ENSSSCT00000017006	GO:0000981(DNA-binding transcription factor activity, RNA polymerase II-specific);GO:0002376(immune system process);GO:0003677(DNA binding);GO:0003700(DNA-binding transcription factor activity);GO:0005515(protein binding);GO:0005634(nucleus);GO:0005737(cytoplasm);GO:0005829(cytosol);GO:0006355(regulation of transcription, DNA-templated);GO:0007050(cell cycle arrest);GO:0008285(negative regulation…	NA	K10154	NA	interferon regulatory factor 6 [Source:NCBI gene;Acc:397521]	protein_coding	0.351754	0.454071	0.339339	0.823868	0.493617	0.732059	1.76875	0.51835	0.372676	1.66031	0.487446	-1.03668	0.0353126	0.925821	down	yes
MSTRG.18462	ENSSSCG00000027434	ENSSSCT00000024704;ENSSSCT00000014932;ENSSSCT00000060839	GO:0005576(extracellular region);GO:0005634(nucleus);GO:0005654(nucleoplasm);GO:0005737(cytoplasm);GO:0007601(visual perception);GO:0007626(locomotory behavior);GO:0009306(protein secretion);GO:0032281(AMPA glutamate receptor complex);GO:0051152(positive regulation of smooth muscle cell differentiation);GO:0097060(synaptic membrane);GO:0098978(glutamatergic synapse);GO:0099243(extrinsic component…	NA	NA	NA	olfactomedin 2 [Source:NCBI gene;Acc:100512648]	protein_coding	7.6626	2.6046	2.25348	7.5227	3.59757	0.750115	3.10843	2.77711	0.85597	3.67057	2.11795	1.08267	0.0353288	0.925821	up	yes
ENSSSCG00000034358	KCNJ16	ENSSSCT00000054230	GO:0005242(inward rectifier potassium channel activity);GO:0005244(voltage-gated ion channel activity);GO:0005886(plasma membrane);GO:0006811(ion transport);GO:0006813(potassium ion transport);GO:0016020(membrane);GO:0016021(integral component of membrane);GO:0034220(ion transmembrane transport);GO:0034765(regulation of ion transmembrane transport);GO:0071805(potassium ion transmembrane transport)	04971(Gastric acid secretion)	K05009	NA	potassium voltage-gated channel subfamily J member 16 [Source:NCBI gene;Acc:100519442]	protein_coding	0.012754	0.024978	0.040715	0.013368	0.048319	0.0001	0.498085	0.0001	0.012573	0.300409	0.172735	-2.53337	0.0354153	0.925821	down	yes
MSTRG.7721	CDCP1	ENSSSCT00000012368;ENSSSCT00000012369	GO:0005515(protein binding);GO:0016020(membrane);GO:0016021(integral component of membrane);GO:0016021(integral component of membrane)	NA	K06732	NA	CUB domain containing protein 1 [Source:NCBI gene;Acc:100512497]	protein_coding	0.344107	0.512865	0.570711	1.04456	0.757938	0.82461	1.98685	0.486907	0.434711	3.78311	0.429764	-1.21838	0.0354403	0.925821	down	yes
MSTRG.5645	ENSSSCG00000017144;ENSSSCG00000039385;ENSSSCG00000032281	ENSSSCT00000018664;ENSSSCT00000045681;ENSSSCT00000062675	GO:0005886(plasma membrane);GO:0043005(neuron projection);GO:0060385(axonogenesis involved in innervation);GO:0098962(regulation of postsynaptic neurotransmitter receptor activity);GO:0098978(glutamatergic synapse)	NA	NA	NA	neuronal pentraxin 1 [Source:NCBI gene;Acc:100525071]	protein_coding	0.747808	1.16426	4.36428	1.34895	3.66208	3.07304	6.92569	5.89281	5.27031	2.06129	0.48604	-1.04085	0.035446	0.925821	down	yes
MSTRG.27261	GGN	ENSSSCT00000050849;ENSSSCT00000003280	GO:0005730(nucleolus);GO:0006302(double-strand break repair);GO:0007276(gamete generation);GO:0007566(embryo implantation);GO:0008104(protein localization);GO:0031625(ubiquitin protein ligase binding);GO:0046983(protein dimerization activity);GO:0048471(perinuclear region of cytoplasm);GO:0048471(perinuclear region of cytoplasm)	NA	NA	NA	gametogenetin [Source:NCBI gene;Acc:100515664]	protein_coding	0.247592	0.329882	1.05578	0.441193	0.357498	0.1572	0.226948	0.209983	0.083859	0.357352	2.34893	1.232	0.0354746	0.925821	up	yes
MSTRG.36424	ITM2A	ENSSSCT00000034500	GO:0002317(plasma cell differentiation);GO:0002377(immunoglobulin production);GO:0016020(membrane);GO:0016021(integral component of membrane)	NA	K18241	NA	integral membrane protein 2A [Source:NCBI gene;Acc:595131]	protein_coding	2.66438	5.79828	4.69376	3.92589	5.10492	8.68579	5.30851	9.00534	9.73606	4.99776	0.587999	-0.766114	0.035561	0.927264	down	no
MSTRG.24770	CCDC65	ENSSSCT00000000188	GO:0003352(regulation of cilium movement);GO:0005858(axonemal dynein complex);GO:0005930(axoneme);GO:0060271(cilium assembly);GO:0060285(cilium-dependent cell motility);GO:0070286(axonemal dynein complex assembly)	NA	NA	NA	coiled-coil domain containing 65 [Source:NCBI gene;Acc:100525107]	protein_coding	1.36528	1.08171	0.916735	0.991159	0.949574	1.2921	2.51219	1.24484	1.75498	3.68179	0.505866	-0.983174	0.0356053	0.927608	down	no
MSTRG.35251	ENSSSCG00000020963	ENSSSCT00000031911	GO:0005509(calcium ion binding);GO:0005576(extracellular region);GO:0005764(lysosome);GO:0007160(cell-matrix adhesion)	NA	NA	NA	ependymin related 1 [Source:NCBI gene;Acc:100521143]	protein_coding	7.14714	4.02555	4.15855	5.70866	7.74666	8.06243	23.2021	4.69079	5.81887	13.4147	0.5216	-0.938984	0.0364954	0.942396	down	no
ENSSSCG00000010609	ENSSSCG00000010609	ENSSSCT00000023381	GO:0005515(protein binding)	NA	NA	NA		protein_coding	0.183521	0.175845	0.337414	0.0001	0.0001	0.059052	2.94532	0.0001	0.156757	1.87313	0.138445	-2.85262	0.0365211	0.942396	down	yes
MSTRG.26900	DPEP3	ENSSSCT00000060081;ENSSSCT00000037869;ENSSSCT00000029212	GO:0001669(acrosomal vesicle);GO:0005886(plasma membrane);GO:0006508(proteolysis);GO:0007140(male meiotic nuclear division);GO:0008233(peptidase activity);GO:0008235(metalloexopeptidase activity);GO:0008237(metallopeptidase activity);GO:0008239(dipeptidyl-peptidase activity);GO:0016020(membrane);GO:0016787(hydrolase activity);GO:0016805(dipeptidase activity);GO:0031225(anchored component of membr…	NA	K01273	EC:3.4.13.19	dipeptidase 3 [Source:NCBI gene;Acc:100621677]	protein_coding	0.0992838	0.0735139	0.0543792	0.0899819	0.0910078	0.0322706	0.568224	0.0130752	0.109163	0.720296	0.282854	-1.82187	0.0366153	0.943846	down	yes
MSTRG.8007	CACNA2D3	ENSSSCT00000042891;ENSSSCT00000039449;ENSSSCT00000051876;ENSSSCT00000023696;ENSSSCT00000024071;ENSSSCT00000059205	GO:0005245(voltage-gated calcium channel activity);GO:0005891(voltage-gated calcium channel complex);GO:0016020(membrane);GO:0016021(integral component of membrane);GO:0070588(calcium ion transmembrane transport);GO:0070588(calcium ion transmembrane transport)	04010(MAPK signaling pathway);04260(Cardiac muscle contraction);04261(Adrenergic signaling in cardiomyocytes);04921(Oxytocin signaling pathway);05410(Hypertrophic cardiomyopathy (HCM));05412(Arrhythmogenic right ventricular cardiomyopathy (ARVC));05414(Dilated cardiomyopathy (DCM));05414(Dilated cardiomyopathy (DCM))	K04860	NA	calcium voltage-gated channel auxiliary subunit alpha2delta 3 [Source:NCBI gene;Acc:100153986]	protein_coding	0.237986	0.429982	0.491917	0.3834	0.467387	0.56173	0.992657	0.468637	0.900692	0.839846	0.534247	-0.904421	0.0368259	0.944565	down	no
MSTRG.18456	ENSSSCG00000022738	ENSSSCT00000047213;ENSSSCT00000039918;ENSSSCT00000026511;ENSSSCT00000031227	GO:0006520(cellular amino acid metabolic process);GO:0006807(nitrogen compound metabolic process);GO:0016787(hydrolase activity);GO:0016811(hydrolase activity, acting on carbon-nitrogen (but not peptide) bonds, in linear amides);GO:0043604(amide biosynthetic process);GO:0043605(cellular amide catabolic process);GO:0044255(cellular lipid metabolic process);GO:0044255(cellular lipid metabolic proce…	NA	K13049	EC:3.4.17.-	N-fatty-acyl-amino acid synthase/hydrolase PM20D1 [Source:NCBI gene;Acc:100519130]	protein_coding	0.904417	0.504307	0.544258	0.536224	0.616456	0.78939	1.56752	1.68347	2.34425	0.411266	0.45699	-1.12976	0.0368272	0.944565	down	yes
MSTRG.13376	DPP4	ENSSSCT00000017306;ENSSSCT00000033784;ENSSSCT00000035225	GO:0002020(protease binding);GO:0004177(aminopeptidase activity);GO:0004252(serine-type endopeptidase activity);GO:0005102(signaling receptor binding);GO:0005576(extracellular region);GO:0005886(plasma membrane);GO:0006508(proteolysis);GO:0007155(cell adhesion);GO:0008233(peptidase activity);GO:0008236(serine-type peptidase activity);GO:0008239(dipeptidyl-peptidase activity);GO:0008284(positive r…	04974(Protein digestion and absorption);04974(Protein digestion and absorption)	K01278	EC:3.4.14.5	dipeptidyl peptidase 4 [Source:NCBI gene;Acc:397492]	protein_coding	0.588343	0.662281	0.600146	0.882864	0.492878	1.0933	4.20312	0.776325	0.665074	0.541005	0.443274	-1.17373	0.0368741	0.944954	down	yes
MSTRG.28872	DLGAP1	ENSSSCT00000058081;ENSSSCT00000055943;ENSSSCT00000057660;ENSSSCT00000056736;ENSSSCT00000004088;ENSSSCT00000062698	GO:0007268(chemical synaptic transmission);GO:0014069(postsynaptic density);GO:0023052(signaling);GO:0045202(synapse);GO:0045202(synapse)	04724(Glutamatergic synapse);04724(Glutamatergic synapse)	K15008	NA	DLG associated protein 1 [Source:NCBI gene;Acc:100627012]	protein_coding	1.52769	2.28414	2.11834	1.22171	1.5125	1.63967	3.85648	1.38174	1.73872	9.48602	0.478625	-1.06303	0.0369262	0.945475	down	yes
MSTRG.20138	BAIAP2L1	ENSSSCT00000008342	GO:0005515(protein binding);GO:0005654(nucleoplasm);GO:0005829(cytosol);GO:0005886(plasma membrane);GO:0007009(plasma membrane organization);GO:0009617(response to bacterium);GO:0015629(actin cytoskeleton);GO:0030833(regulation of actin filament polymerization);GO:0030838(positive regulation of actin filament polymerization);GO:0046626(regulation of insulin receptor signaling pathway);GO:0051017(…	NA	K20127	NA	BAI1 associated protein 2 like 1 [Source:NCBI gene;Acc:100521439]	protein_coding	1.27736	1.30455	1.99871	1.12062	1.44994	0.990592	5.00399	1.18729	1.9046	6.40597	0.461591	-1.11531	0.0371185	0.949584	down	yes
MSTRG.29277	ENSSSCG00000039433	ENSSSCT00000044625;ENSSSCT00000061465	GO:0005623(cell);GO:0006826(iron ion transport);GO:0006879(cellular iron ion homeostasis);GO:0008199(ferric iron binding);GO:0046872(metal ion binding);GO:0046872(metal ion binding)	NA	NA	NA		protein_coding	0.656492	0.692119	0.450926	0.589837	0.509104	0.90147	1.30566	0.851911	0.775878	2.06027	0.491669	-1.02424	0.0372424	0.949968	down	yes
MSTRG.7017	SLC16A13	ENSSSCT00000019509	GO:0005794(Golgi apparatus);GO:0005887(integral component of plasma membrane);GO:0008028(monocarboxylic acid transmembrane transporter activity);GO:0015718(monocarboxylic acid transport);GO:0016020(membrane);GO:0016021(integral component of membrane);GO:0055085(transmembrane transport)	NA	K08189	NA	solute carrier family 16 member 13 [Source:NCBI gene;Acc:100517000]	protein_coding	0.637128	0.516197	0.917332	0.618892	0.565414	0.710297	1.4771	0.654485	0.837842	2.73543	0.507386	-0.978844	0.0374505	0.95235	down	no
ENSSSCG00000011837	MELTF	ENSSSCT00000012949	GO:0005506(iron ion binding);GO:0005576(extracellular region);GO:0005615(extracellular space);GO:0006826(iron ion transport);GO:0009986(cell surface);GO:0010756(positive regulation of plasminogen activation);GO:0046658(anchored component of plasma membrane);GO:0090091(positive regulation of extracellular matrix disassembly);GO:1900025(negative regulation of substrate adhesion-dependent cell sprea…	NA	K06569	NA	melanotransferrin [Source:NCBI gene;Acc:100156949]	protein_coding	0.089499	0.089229	0.428459	0.534563	0.041583	0.057959	0.054418	0.068299	0.157179	0.090982	2.7594	1.46435	0.0376042	0.955359	up	yes
ENSSSCG00000031423	UPK3A	ENSSSCT00000053081	GO:0000902(cell morphogenesis);GO:0001822(kidney development);GO:0006833(water transport);GO:0015840(urea transport);GO:0016020(membrane);GO:0016021(integral component of membrane);GO:0016324(apical plasma membrane);GO:0030855(epithelial cell differentiation);GO:0055075(potassium ion homeostasis);GO:0055078(sodium ion homeostasis);GO:0060157(urinary bladder development);GO:0120001(apical plasma m…	05219(Bladder cancer)	K19520	NA	uroplakin 3A [Source:NCBI gene;Acc:397558]	protein_coding	0.0001	0.022381	0.00896	0.082031	0.0001	0.022834	0.277728	0.057787	0.0001	0.351775	0.15991	-2.64467	0.0376461	0.955359	down	yes
MSTRG.28589	FAM167B	ENSSSCT00000004011	NA	NA	NA	NA	family with sequence similarity 167 member B [Source:NCBI gene;Acc:100519719]	protein_coding	9.75853	0.495559	2.02069	2.12022	15.756	0.71488	3.66609	0.842316	1.1939	3.80779	2.94876	1.56011	0.0378848	0.957415	up	yes
MSTRG.26862	HSD11B2	ENSSSCT00000003075	GO:0007565(female pregnancy);GO:0016491(oxidoreductase activity);GO:0055114(oxidation-reduction process)	00140(Steroid hormone biosynthesis);04960(Aldosterone-regulated sodium reabsorption)	K00071	EC:1.1.1.-	hydroxysteroid 11-beta dehydrogenase 2 [Source:NCBI gene;Acc:396948]	protein_coding	29.2415	0.323899	0.25662	1.35082	0.71324	0.539502	4.55963	0.874073	0.537521	0.680855	4.43381	2.14855	0.0379119	0.957415	up	yes
MSTRG.25158	CPSF6	ENSSSCT00000053818;ENSSSCT00000055283;ENSSSCT00000039379;ENSSSCT00000041371;ENSSSCT00000064622	GO:0003676(nucleic acid binding);GO:0003723(RNA binding);GO:0003729(mRNA binding);GO:0005634(nucleus);GO:0005654(nucleoplasm);GO:0005726(perichromatin fibrils);GO:0005737(cytoplasm);GO:0005847(mRNA cleavage and polyadenylation specificity factor complex);GO:0005849(mRNA cleavage factor complex);GO:0006397(mRNA processing);GO:0016607(nuclear speck);GO:0035061(interchromatin granule);GO:0042382(par…	03015(mRNA surveillance pathway);03015(mRNA surveillance pathway)	K14398	NA	cleavage and polyadenylation specific factor 6 [Source:NCBI gene;Acc:100152191]	protein_coding	3.58897	5.67905	4.07153	4.12114	5.0875	5.58197	8.65348	11.1279	4.11208	8.03164	0.601172	-0.734151	0.0384007	0.967426	down	no
MSTRG.16691	AASS	ENSSSCT00000047587;ENSSSCT00000018087;ENSSSCT00000056868	GO:0004753(saccharopine dehydrogenase activity);GO:0005737(cytoplasm);GO:0005739(mitochondrion);GO:0016491(oxidoreductase activity);GO:0019477(L-lysine catabolic process);GO:0043231(intracellular membrane-bounded organelle);GO:0047131(saccharopine dehydrogenase (NAD+, L-glutamate-forming) activity);GO:0055114(oxidation-reduction process);GO:0055114(oxidation-reduction process)	00310(Lysine degradation);00310(Lysine degradation)	K14157	1.5.1.9;EC:1.5.1.8	aminoadipate-semialdehyde synthase [Source:NCBI gene;Acc:100513962]	protein_coding	1.81044	4.70483	4.78989	4.18988	3.34446	2.65017	1.55576	2.71247	2.65083	1.74019	1.66583	0.736237	0.0384434	0.967681	up	no
MSTRG.31896	DIO2	ENSSSCT00000065367	GO:0004800(thyroxine 5'-deiodinase activity);GO:0005623(cell);GO:0016491(oxidoreductase activity);GO:0042404(thyroid hormone catabolic process);GO:0042446(hormone biosynthetic process);GO:0045454(cell redox homeostasis);GO:0055114(oxidation-reduction process);GO:0120162(positive regulation of cold-induced thermogenesis)	04919(Thyroid hormone signaling pathway)	K17904	EC:1.21.99.4	iodothyronine deiodinase 2 [Source:NCBI gene;Acc:414379]	protein_coding	0.730757	0.14913	2.08781	1.22057	5.43242	0.41852	0.263506	0.869374	0.308983	1.69058	2.70931	1.43793	0.0386943	0.971036	up	yes
MSTRG.25482	APOLD1	ENSSSCT00000046919	GO:0005576(extracellular region);GO:0005654(nucleoplasm);GO:0005829(cytosol);GO:0006869(lipid transport);GO:0008289(lipid binding);GO:0016020(membrane);GO:0016021(integral component of membrane);GO:0042157(lipoprotein metabolic process)	NA	NA	NA	apolipoprotein L domain containing 1 [Source:HGNC Symbol;Acc:HGNC:25268]	protein_coding	1.70126	2.34682	5.23736	2.11469	3.06943	1.81696	1.61871	2.29511	0.971417	1.35854	1.79507	0.844037	0.0387303	0.971036	up	no
MSTRG.24500	ENSSSCG00000031417	ENSSSCT00000062498	GO:0005509(calcium ion binding)	NA	NA	NA		protein_coding	0.794311	0.439246	0.966112	0.712864	0.34262	0.606043	1.75338	0.472894	1.00664	3.53761	0.441283	-1.18022	0.0387668	0.971036	down	yes
MSTRG.33984	CHRDL2	ENSSSCT00000016195	GO:0005515(protein binding)	NA	K17280	NA	chordin like 2 [Source:NCBI gene;Acc:100739055]	protein_coding	0.189264	0.232659	0.232194	0.351646	4.22714	0.500237	0.029481	0.486515	0.131847	0.324467	3.55364	1.8293	0.0388556	0.971036	up	yes
MSTRG.3057	SVEP1	ENSSSCT00000006000;ENSSSCT00000065911;ENSSSCT00000065214	GO:0003682(chromatin binding);GO:0005509(calcium ion binding);GO:0005509(calcium ion binding)	NA	K17495	NA	sushi, von Willebrand factor type A, EGF and pentraxin domain containing 1 [Source:NCBI gene;Acc:100155613]	protein_coding	22.9777	17.7161	24.2252	31.4542	44.1097	14.2338	10.4172	19.7868	22.3454	20.6951	1.60592	0.683397	0.0389649	0.971772	up	no
ENSSSCG00000010764	ENSSSCG00000010764	ENSSSCT00000011776	GO:0005515(protein binding)	NA	NA	NA		protein_coding	0.171627	0.273388	0.114501	0.121751	0.165294	0.187401	0.523208	0.043362	0.223256	1.55363	0.334496	-1.57994	0.0390797	0.973006	down	yes
MSTRG.17177	PKP3	ENSSSCT00000051706;ENSSSCT00000024904	GO:0002159(desmosome assembly);GO:0005515(protein binding);GO:0005634(nucleus);GO:0005654(nucleoplasm);GO:0005737(cytoplasm);GO:0005886(plasma membrane);GO:0005911(cell-cell junction);GO:0005913(cell-cell adherens junction);GO:0007043(cell-cell junction assembly);GO:0007155(cell adhesion);GO:0010628(positive regulation of gene expression);GO:0019899(enzyme binding);GO:0030054(cell junction);GO:00…	NA	NA	NA	plakophilin 3 [Source:NCBI gene;Acc:100626903]	protein_coding	0.0976605	0.147998	0.109136	0.185364	0.123909	0.216591	0.322953	0.0784702	0.285385	0.639036	0.430532	-1.21581	0.0391285	0.973407	down	yes
MSTRG.30825	DNAJA4	ENSSSCT00000055463;ENSSSCT00000055843;ENSSSCT00000001965	GO:0005515(protein binding);GO:0005524(ATP binding);GO:0005829(cytosol);GO:0006457(protein folding);GO:0009408(response to heat);GO:0016020(membrane);GO:0031072(heat shock protein binding);GO:0042026(protein refolding);GO:0046872(metal ion binding);GO:0051082(unfolded protein binding);GO:0051087(chaperone binding);GO:0090084(negative regulation of inclusion body assembly);GO:0090084(negative regu…	NA	K09505	NA	DnaJ heat shock protein family (Hsp40) member A4 [Source:NCBI gene;Acc:397613]	protein_coding	0.816843	1.20064	1.55535	1.34433	0.574516	1.68445	1.81292	1.92546	1.97818	2.18474	0.5729	-0.803646	0.039355	0.974669	down	no
MSTRG.7742	LRRC2	ENSSSCT00000047472;ENSSSCT00000026965	GO:0005515(protein binding);GO:0005515(protein binding)	NA	NA	NA	leucine rich repeat containing 2 [Source:NCBI gene;Acc:100151747]	protein_coding	0.0243708	0.087504	0.125049	0.119443	0.0509531	0.0001	1.97739	0.0137207	0.0001	0.677497	0.152622	-2.71196	0.039382	0.974669	down	yes
MSTRG.20608	IL4R	ENSSSCT00000034531;ENSSSCT00000008566;ENSSSCT00000033060	GO:0002532(production of molecular mediator involved in inflammatory response);GO:0004896(cytokine receptor activity);GO:0005515(protein binding);GO:0016020(membrane);GO:0016021(integral component of membrane);GO:0019221(cytokine-mediated signaling pathway);GO:0043235(receptor complex);GO:0043235(receptor complex)	04060(Cytokine-cytokine receptor interaction);04151(PI3K-Akt signaling pathway);04630(Jak-STAT signaling pathway);04640(Hematopoietic cell lineage);04658(Th1 and Th2 cell differentiation);04659(Th17 cell differentiation);05200(Pathways in cancer);05321(Inflammatory bowel disease (IBD));05321(Inflammatory bowel disease (IBD))	K05071	NA	interleukin 4 receptor [Source:NCBI gene;Acc:397614]	protein_coding	3.77686	1.10562	2.06594	3.36671	4.27761	1.63227	2.12105	1.34597	0.529103	2.10457	1.88708	0.916156	0.0393892	0.974669	up	no
ENSSSCG00000001841	RHCG	ENSSSCT00000002063	GO:0005886(plasma membrane);GO:0005887(integral component of plasma membrane);GO:0006873(cellular ion homeostasis);GO:0006885(regulation of pH);GO:0008519(ammonium transmembrane transporter activity);GO:0015696(ammonium transport);GO:0016020(membrane);GO:0016021(integral component of membrane);GO:0016323(basolateral plasma membrane);GO:0016324(apical plasma membrane);GO:0030506(ankyrin binding);G…	NA	K06580	NA	Rh family C glycoprotein [Source:NCBI gene;Acc:733644]	protein_coding	0.263004	0.03724	0.014417	0.576827	0.0001	0.034637	0.064598	0.048875	0.0001	0.02442	5.16473	2.36869	0.0394084	0.974669	up	yes
MSTRG.33141	IL15	ENSSSCT00000032937;ENSSSCT00000036525	GO:0001779(natural killer cell differentiation);GO:0001866(NK T cell proliferation);GO:0005125(cytokine activity);GO:0005126(cytokine receptor binding);GO:0005576(extracellular region);GO:0005615(extracellular space);GO:0005654(nucleoplasm);GO:0005737(cytoplasm);GO:0005829(cytosol);GO:0006955(immune response);GO:0007260(tyrosine phosphorylation of STAT protein);GO:0010469(regulation of signaling …	04060(Cytokine-cytokine receptor interaction);04630(Jak-STAT signaling pathway);04668(TNF signaling pathway);04672(Intestinal immune network for IgA production);05166(Human T-cell leukemia virus 1 infection);05200(Pathways in cancer);05323(Rheumatoid arthritis);05323(Rheumatoid arthritis)	K05433	NA	interleukin 15 [Source:NCBI gene;Acc:397683]	protein_coding	0.188236	0.200329	0.361614	0.60358	0.306712	0.17002	1.45709	0.34899	0.174622	2.03529	0.396671	-1.33399	0.0398593	0.982214	down	yes
MSTRG.20123	ENSSSCG00000007589	ENSSSCT00000008329	NA	NA	NA	NA	radial spoke head 10 homolog B [Source:NCBI gene;Acc:100516852]	protein_coding	0.252077	0.393856	0.395271	0.267139	0.249711	0.162349	1.19897	0.219834	0.573692	1.73881	0.400152	-1.32138	0.0398619	0.982214	down	yes
MSTRG.12113	AVPI1	ENSSSCT00000060361	GO:0000187(activation of MAPK activity)	NA	NA	NA	arginine vasopressin induced 1 [Source:NCBI gene;Acc:100155615]	protein_coding	19.6524	1.61788	1.46844	5.41853	1.58216	1.73413	4.60685	2.11377	1.78699	1.89346	2.45068	1.29318	0.0400693	0.984475	up	yes
MSTRG.888	ENSSSCG00000004388;ENSSSCG00000038818	ENSSSCT00000004851;ENSSSCT00000056166;ENSSSCT00000060669;ENSSSCT00000058439	GO:0005515(protein binding);GO:0005515(protein binding)	NA	NA	NA	armadillo repeat containing 2 [Source:NCBI gene;Acc:100523341]	protein_coding	0.793784	0.780596	0.718051	1.00792	0.852984	1.13578	1.70961	0.973016	0.894663	2.71044	0.559485	-0.83783	0.0401819	0.986075	down	no
MSTRG.9682	PLCXD2	ENSSSCT00000043186;ENSSSCT00000041183	GO:0006629(lipid metabolic process);GO:0008081(phosphoric diester hydrolase activity);GO:0008081(phosphoric diester hydrolase activity)	NA	NA	NA	phosphatidylinositol specific phospholipase C X domain containing 2 [Source:NCBI gene;Acc:100518335]	protein_coding	0.420616	0.0512479	0.0493653	0.324323	0.0807548	0.0889036	2.09466	0.132086	0.0743094	0.759546	0.294112	-1.76556	0.0402338	0.986075	down	yes
MSTRG.5809	C17orf80	ENSSSCT00000058576;ENSSSCT00000051746;ENSSSCT00000018775;ENSSSCT00000046965;ENSSSCT00000060229;ENSSSCT00000027741	GO:0016020(membrane);GO:0016021(integral component of membrane);GO:0016021(integral component of membrane)	NA	NA	NA	chromosome 12 C17orf80 homolog [Source:NCBI gene;Acc:100517602]	protein_coding	1.51434	2.21284	1.98989	0.984338	1.6065	2.2285	3.31001	2.07689	4.08611	2.25949	0.59508	-0.748845	0.0403088	0.987101	down	no
MSTRG.15106	CCDC69	ENSSSCT00000063610;ENSSSCT00000038220;ENSSSCT00000046369	GO:0051233(spindle midzone);GO:0051255(spindle midzone assembly);GO:0051255(spindle midzone assembly)	NA	NA	NA	coiled-coil domain containing 69 [Source:NCBI gene;Acc:100515590]	protein_coding	1.88186	1.64772	1.43333	1.00187	0.703522	0.707152	3.74431	1.96212	2.19509	5.07099	0.487461	-1.03664	0.0404232	0.987847	down	yes
MSTRG.19297	EFNA5	ENSSSCT00000064949;ENSSSCT00000054006	GO:0005169(neurotrophin TRKB receptor binding);GO:0005604(basement membrane);GO:0005886(plasma membrane);GO:0005912(adherens junction);GO:0007411(axon guidance);GO:0016020(membrane);GO:0022407(regulation of cell-cell adhesion);GO:0022604(regulation of cell morphogenesis);GO:0031290(retinal ganglion cell axon guidance);GO:0031362(anchored component of external side of plasma membrane);GO:0032956(r…	04010(MAPK signaling pathway);04014(Ras signaling pathway);04015(Rap1 signaling pathway);04151(PI3K-Akt signaling pathway);04360(Axon guidance);04360(Axon guidance)	K05462	NA	ephrin A5 [Source:NCBI gene;Acc:100513721]	protein_coding	3.44835	1.85584	5.12688	3.65481	2.22687	1.40487	2.10746	1.45399	2.93586	2.04018	1.64073	0.714341	0.0404293	0.987847	up	no
MSTRG.22012	QPCT	ENSSSCT00000009293;ENSSSCT00000028025;ENSSSCT00000041233;ENSSSCT00000046599	GO:0008270(zinc ion binding);GO:0016603(glutaminyl-peptide cyclotransferase activity);GO:0017186(peptidyl-pyroglutamic acid biosynthetic process, using glutaminyl-peptide cyclotransferase);GO:0017186(peptidyl-pyroglutamic acid biosynthetic process, using glutaminyl-peptide cyclotransferase)	NA	K00683	EC:2.3.2.5	glutaminyl-peptide cyclotransferase [Source:NCBI gene;Acc:397424]	protein_coding	2.3946	0.933878	0.850079	1.53	1.16467	0.811842	11.7135	0.531753	0.499948	6.04079	0.350713	-1.51164	0.0404719	0.987847	down	yes
MSTRG.11944	PAPSS2	ENSSSCT00000034544;ENSSSCT00000033551;ENSSSCT00000011422;ENSSSCT00000033703	GO:0000103(sulfate assimilation);GO:0004020(adenylylsulfate kinase activity);GO:0004781(sulfate adenylyltransferase (ATP) activity);GO:0005524(ATP binding);GO:0007596(blood coagulation);GO:0016310(phosphorylation);GO:0050428(3'-phosphoadenosine 5'-phosphosulfate biosynthetic process);GO:0060348(bone development);GO:0060348(bone development)	00230(Purine metabolism);00450(Selenocompound metabolism);00920(Sulfur metabolism);00920(Sulfur metabolism)	K13811	2.7.1.25;EC:2.7.7.4	3'-phosphoadenosine 5'-phosphosulfate synthase 2 [Source:NCBI gene;Acc:100156262]	protein_coding	11.5518	5.80237	2.92328	6.78728	3.51102	11.0391	27.9358	15.503	5.7838	3.58036	0.478928	-1.06212	0.0405861	0.989013	down	yes
MSTRG.16085	KCNG1	ENSSSCT00000008182	GO:0005216(ion channel activity);GO:0005244(voltage-gated ion channel activity);GO:0005249(voltage-gated potassium channel activity);GO:0005251(delayed rectifier potassium channel activity);GO:0005267(potassium channel activity);GO:0005515(protein binding);GO:0005886(plasma membrane);GO:0006811(ion transport);GO:0006813(potassium ion transport);GO:0008076(voltage-gated potassium channel complex);…	NA	K04900	NA	potassium voltage-gated channel modifier subfamily G member 1 [Source:NCBI gene;Acc:100134965]	protein_coding	0.0191401	0.147423	0.0904774	0.0960578	0.0128062	0.0001	0.0001	0.0001	0.00615828	5.05129	0.0723453	-3.78896	0.0409965	0.993018	down	yes
MSTRG.24685	TST	ENSSSCT00000042546;ENSSSCT00000044466;ENSSSCT00000000139	GO:0004792(thiosulfate sulfurtransferase activity);GO:0005739(mitochondrion);GO:0008097(5S rRNA binding);GO:0016740(transferase activity);GO:0030855(epithelial cell differentiation);GO:0035928(rRNA import into mitochondrion);GO:0051029(rRNA transport);GO:0051029(rRNA transport)	00270(Cysteine and methionine metabolism);00920(Sulfur metabolism);04122(Sulfur relay system);04122(Sulfur relay system)	K01011	2.8.1.2;EC:2.8.1.1	thiosulfate sulfurtransferase [Source:NCBI gene;Acc:100153230]	protein_coding	0.631034	0.771591	0.472868	0.624525	0.499681	0.614641	2.91703	0.466648	0.734805	1.58374	0.474871	-1.07439	0.041087	0.993091	down	yes
MSTRG.29391	CYP2J34	ENSSSCT00000026469;ENSSSCT00000032807;ENSSSCT00000039443;ENSSSCT00000034483;ENSSSCT00000031115;ENSSSCT00000033172;ENSSSCT00000004234;ENSSSCT00000004233;ENSSSCT00000050887;ENSSSCT00000061616	GO:0004497(monooxygenase activity);GO:0005506(iron ion binding);GO:0005737(cytoplasm);GO:0006082(organic acid metabolic process);GO:0006805(xenobiotic metabolic process);GO:0008392(arachidonic acid epoxygenase activity);GO:0008395(steroid hydroxylase activity);GO:0008404(arachidonic acid 14,15-epoxygenase activity);GO:0008405(arachidonic acid 11,12-epoxygenase activity);GO:0016020(membrane);GO:00…	00590(Arachidonic acid metabolism);00591(Linoleic acid metabolism);04726(Serotonergic synapse);04750(Inflammatory mediator regulation of TRP channels);04913(Ovarian steroidogenesis);04913(Ovarian steroidogenesis)	K07418	1.14.14.73;1.14.14.74;1.14.14.75;EC:1.14.14.1	cytochrome P450 2J2 [Source:NCBI gene;Acc:100524940]	protein_coding	0.316874	0.0628344	0.288537	0.103181	0.272053	0.362042	0.878568	0.103013	0.294529	0.833568	0.422167	-1.24411	0.0411459	0.993708	down	yes
MSTRG.29022	DSC3	ENSSSCT00000029720;ENSSSCT00000022913;ENSSSCT00000048109;ENSSSCT00000004125;ENSSSCT00000047176;ENSSSCT00000023517	GO:0001701(in utero embryonic development);GO:0005509(calcium ion binding);GO:0005576(extracellular region);GO:0005737(cytoplasm);GO:0005886(plasma membrane);GO:0007155(cell adhesion);GO:0007156(homophilic cell adhesion via plasma membrane adhesion molecules);GO:0016020(membrane);GO:0016021(integral component of membrane);GO:0030054(cell junction);GO:0030057(desmosome);GO:0030057(desmosome)	05412(Arrhythmogenic right ventricular cardiomyopathy (ARVC));05412(Arrhythmogenic right ventricular cardiomyopathy (ARVC))	K07601;K07602	NA	desmocollin 2 [Source:NCBI gene;Acc:100623651]	protein_coding	0.736901	1.5253	0.450727	1.15234	0.745084	1.59807	1.8394	1.00858	0.475321	5.07347	0.461273	-1.11631	0.0412824	0.996198	down	yes
MSTRG.28749	ENSSSCG00000023322	ENSSSCT00000029893	GO:0005201(extracellular matrix structural constituent);GO:0005594(collagen type IX trimer);GO:0005604(basement membrane);GO:0005615(extracellular space);GO:0030198(extracellular matrix organization);GO:0031012(extracellular matrix)	04151(PI3K-Akt signaling pathway);04510(Focal adhesion);04512(ECM-receptor interaction);04974(Protein digestion and absorption);05165(Human papillomavirus infection)	K08131	NA	collagen type IX alpha 2 chain [Source:NCBI gene;Acc:100621911]	protein_coding	1.39353	3.7017	0.997286	2.12526	1.40583	6.06586	0.700076	9.03344	3.4795	2.04603	0.451285	-1.14789	0.0416698	1	down	yes
MSTRG.26728	PLLP	ENSSSCT00000056544;ENSSSCT00000003118	GO:0016020(membrane);GO:0016021(integral component of membrane);GO:0019911(structural constituent of myelin sheath);GO:0042552(myelination);GO:0042552(myelination)	NA	NA	NA	plasmolipin [Source:NCBI gene;Acc:100516614]	protein_coding	0.948793	1.49297	0.586691	0.259728	1.72737	1.38484	2.50261	1.6555	1.67102	2.80163	0.500773	-0.997771	0.041672	1	down	no
MSTRG.35100	SEMA3C	ENSSSCT00000031885	GO:0001755(neural crest cell migration);GO:0001756(somitogenesis);GO:0001974(blood vessel remodeling);GO:0003148(outflow tract septum morphogenesis);GO:0003151(outflow tract morphogenesis);GO:0003215(cardiac right ventricle morphogenesis);GO:0003350(pulmonary myocardium development);GO:0005515(protein binding);GO:0005615(extracellular space);GO:0005887(integral component of plasma membrane);GO:00…	04360(Axon guidance)	K06840	NA	semaphorin 3C [Source:NCBI gene;Acc:100624508]	protein_coding	1.42515	3.21002	3.20912	2.3075	3.9229	2.47076	6.38959	2.05262	2.30699	16.8853	0.467516	-1.09691	0.0417028	1	down	yes
MSTRG.16733	WNT2	ENSSSCT00000045753;ENSSSCT00000018104;ENSSSCT00000057297	GO:0002053(positive regulation of mesenchymal cell proliferation);GO:0005102(signaling receptor binding);GO:0005109(frizzled binding);GO:0005125(cytokine activity);GO:0005576(extracellular region);GO:0005615(extracellular space);GO:0005737(cytoplasm);GO:0007267(cell-cell signaling);GO:0007275(multicellular organism development);GO:0008284(positive regulation of cell population proliferation);GO:0…	04150(mTOR signaling pathway);04310(Wnt signaling pathway);04390(Hippo signaling pathway);04550(Signaling pathways regulating pluripotency of stem cells);04916(Melanogenesis);04934(Cushing syndrome);05165(Human papillomavirus infection);05200(Pathways in cancer);05205(Proteoglycans in cancer);05217(Basal cell carcinoma);05224(Breast cancer);05225(Hepatocellular carcinoma);05226(Gastric cancer);05…	K00182	NA	Wnt family member 2 [Source:NCBI gene;Acc:100516839]	protein_coding	2.99666	2.49562	9.9527	4.34372	8.38134	2.51477	1.15709	3.77036	2.4844	5.17691	1.86513	0.899275	0.0417123	1	up	no
MSTRG.4160	DDX58;TOPORS	ENSSSCT00000026775;ENSSSCT00000058360;ENSSSCT00000012046;ENSSSCT00000038964;ENSSSCT00000022741;ENSSSCT00000048370	GO:0002230(positive regulation of defense response to virus by host);GO:0002735(positive regulation of myeloid dendritic cell cytokine production);GO:0003676(nucleic acid binding);GO:0003690(double-stranded DNA binding);GO:0003725(double-stranded RNA binding);GO:0003727(single-stranded RNA binding);GO:0005524(ATP binding);GO:0005737(cytoplasm);GO:0005829(cytosol);GO:0005923(bicellular tight junct…	04064(NF-kappa B signaling pathway);04622(RIG-I-like receptor signaling pathway);04623(Cytosolic DNA-sensing pathway);05160(Hepatitis C);05161(Hepatitis B);05162(Measles);05164(Influenza A);05168(Herpes simplex virus 1 infection);05169(Epstein-Barr virus infection);05169(Epstein-Barr virus infection)	K12646;K10631	EC:3.6.4.13;EC:2.3.2.27	DExD/H-box helicase 58 [Source:NCBI gene;Acc:396723];TOP1 binding arginine/serine rich protein [Source:NCBI gene;Acc:100513812]	protein_coding	4.71402	4.31704	5.19087	29.2153	4.73062	4.52767	6.19306	4.355	4.35133	4.61272	2.00367	1.00265	0.0418122	1	up	yes
MSTRG.2675	TMEM252	ENSSSCT00000056483;ENSSSCT00000039664	GO:0016020(membrane);GO:0016021(integral component of membrane);GO:0016021(integral component of membrane)	NA	NA	NA	transmembrane protein 252 [Source:NCBI gene;Acc:100512327]	protein_coding	0.074837	0.359889	0.312571	0.422592	0.134666	0.216264	0.16168	0.136591	0.031606	4.58167	0.254408	-1.97479	0.0418816	1	down	yes
MSTRG.1562	FRMD5	ENSSSCT00000058863;ENSSSCT00000005184	GO:0005178(integrin binding);GO:0005856(cytoskeleton);GO:0005912(adherens junction);GO:0016020(membrane);GO:0016021(integral component of membrane);GO:0019901(protein kinase binding);GO:0030334(regulation of cell migration);GO:0031032(actomyosin structure organization);GO:0045785(positive regulation of cell adhesion);GO:2000146(negative regulation of cell motility);GO:2000146(negative regulation …	NA	NA	NA	FERM domain containing 5 [Source:NCBI gene;Acc:100152168]	protein_coding	0.434225	0.114817	0.57462	0.779317	0.524896	0.56888	1.55701	0.439096	0.635515	2.17366	0.451768	-1.14635	0.0419088	1	down	yes
MSTRG.34977	SCIN	ENSSSCT00000066126;ENSSSCT00000058206;ENSSSCT00000016727	GO:0005509(calcium ion binding);GO:0005886(plasma membrane);GO:0005903(brush border);GO:0008285(negative regulation of cell population proliferation);GO:0042989(sequestering of actin monomers);GO:0043065(positive regulation of apoptotic process);GO:0045654(positive regulation of megakaryocyte differentiation);GO:0051014(actin filament severing);GO:0051015(actin filament binding);GO:0051127(positi…	04666(Fc gamma R-mediated phagocytosis);04810(Regulation of actin cytoskeleton);05203(Viral carcinogenesis);05203(Viral carcinogenesis)	K05768	NA	scinderin [Source:NCBI gene;Acc:100512981]	protein_coding	0.533292	0.519964	2.5305	1.0372	0.805833	0.812304	7.14705	0.886167	0.553388	4.42152	0.392664	-1.34863	0.0419122	1	down	yes
MSTRG.17929	FANCF	ENSSSCT00000062285	GO:0036297(interstrand cross-link repair);GO:0043240(Fanconi anaemia nuclear complex)	03460(Fanconi anemia pathway)	K10893	NA	FA complementation group F [Source:NCBI gene;Acc:100519701]	protein_coding	2.19089	0.680713	0.710192	1.02648	0.81777	1.14764	8.54093	1.09425	1.18927	1.03046	0.417306	-1.26082	0.0420317	1	down	yes
MSTRG.28964	CABLES1	ENSSSCT00000004104;ENSSSCT00000039322;ENSSSCT00000064133	GO:0005829(cytosol);GO:0051726(regulation of cell cycle);GO:0051726(regulation of cell cycle)	NA	NA	NA	Cdk5 and Abl enzyme substrate 1 [Source:NCBI gene;Acc:100526114]	protein_coding	0.588317	1.25042	0.957699	1.53906	1.26159	3.26005	0.631345	3.43726	1.24628	2.14895	0.521927	-0.938081	0.0422032	1	down	no
MSTRG.302	LRP11	ENSSSCT00000004536;ENSSSCT00000054854;ENSSSCT00000040266;ENSSSCT00000062003	GO:0005515(protein binding);GO:0005575(cellular_component);GO:0009408(response to heat);GO:0009409(response to cold);GO:0009414(response to water deprivation);GO:0009612(response to mechanical stimulus);GO:0016020(membrane);GO:0016021(integral component of membrane);GO:0033555(multicellular organismal response to stress);GO:0035902(response to immobilization stress);GO:0042594(response to starvat…	NA	NA	NA	LDL receptor related protein 11 [Source:NCBI gene;Acc:100153355]	protein_coding	6.00251	4.51174	2.0111	6.00298	3.60134	3.31139	33.4757	6.6606	3.65526	3.5691	0.436724	-1.19521	0.0425421	1	down	yes
ENSSSCG00000015138	JHY	ENSSSCT00000016504	GO:0007420(brain development);GO:0032053(ciliary basal body organization);GO:0033326(cerebrospinal fluid secretion);GO:0035082(axoneme assembly)	NA	NA	NA	junctional cadherin complex regulator [Source:NCBI gene;Acc:100521569]	protein_coding	0.106606	0.0001	0.011465	0.0001	0.035213	0.0001	0.378003	0.021697	0.007957	0.780439	0.129174	-2.95261	0.0425888	1	down	yes
MSTRG.19896	ENSSSCG00000029257	ENSSSCT00000026614	GO:0005515(protein binding)	NA	NA	NA	acrosin inhibitor [Source:NCBI gene;Acc:396905]	protein_coding	0.877324	2.22233	1.08876	2.17227	1.9624	2.0276	5.65774	1.9514	3.02913	3.79707	0.505564	-0.984033	0.042629	1	down	no
ENSSSCG00000026427	RORC	ENSSSCT00000043021;ENSSSCT00000051862;ENSSSCT00000048796;ENSSSCT00000046546;ENSSSCT00000046456;ENSSSCT00000046104;ENSSSCT00000029985;ENSSSCT00000045616	GO:0000122(negative regulation of transcription by RNA polymerase II);GO:0000978(RNA polymerase II proximal promoter sequence-specific DNA binding);GO:0001223(transcription coactivator binding);GO:0001227(DNA-binding transcription repressor activity, RNA polymerase II-specific);GO:0003677(DNA binding);GO:0003700(DNA-binding transcription factor activity);GO:0003707(steroid hormone receptor activi…	04659(Th17 cell differentiation);04710(Circadian rhythm);05321(Inflammatory bowel disease (IBD));05321(Inflammatory bowel disease (IBD))	K08534	NA	RAR related orphan receptor C [Source:NCBI gene;Acc:100622477]	protein_coding	0.0681709	0.128891	0.23478	0.292526	0.184171	0.189126	0.606806	0.239454	0.215581	0.720093	0.460939	-1.11735	0.0426858	1	down	yes
MSTRG.1583	TGM5	ENSSSCT00000005205;ENSSSCT00000056889	GO:0003810(protein-glutamine gamma-glutamyltransferase activity);GO:0018149(peptide cross-linking);GO:0046872(metal ion binding);GO:0046872(metal ion binding)	NA	K05622	EC:2.3.2.13	transglutaminase 5 [Source:NCBI gene;Acc:100158178]	protein_coding	6.41087	0.0876328	0.0926504	0.736467	0.10354	0.0534859	1.03044	0.0229112	0.072563	0.0001	6.30026	2.65541	0.042854	1	up	yes
MSTRG.33240	NUDT6	ENSSSCT00000009951	GO:0005737(cytoplasm);GO:0008285(negative regulation of cell population proliferation);GO:0016787(hydrolase activity);GO:0035529(NADH pyrophosphatase activity);GO:0045786(negative regulation of cell cycle);GO:0047631(ADP-ribose diphosphatase activity);GO:0051287(NAD binding)	NA	NA	NA	nudix hydrolase 6 [Source:NCBI gene;Acc:100519612]	protein_coding	0.762382	1.42418	3.45303	1.73132	6.24812	1.50671	0.901568	1.75874	1.68942	1.43283	1.86837	0.90178	0.0430434	1	up	no
MSTRG.22177	SLC5A6	ENSSSCT00000049034;ENSSSCT00000041536;ENSSSCT00000065862;ENSSSCT00000009355;ENSSSCT00000044697;ENSSSCT00000052516;ENSSSCT00000050248	GO:0008523(sodium-dependent multivitamin transmembrane transporter activity);GO:0015878(biotin transport);GO:0015887(pantothenate transmembrane transport);GO:0016020(membrane);GO:0016021(integral component of membrane);GO:0022857(transmembrane transporter activity);GO:0055085(transmembrane transport);GO:0055085(transmembrane transport)	04977(Vitamin digestion and absorption);04977(Vitamin digestion and absorption)	K14386	NA	solute carrier family 5 member 6 [Source:NCBI gene;Acc:100522014]	protein_coding	15.1868	1.39345	2.05898	4.77751	2.17883	2.65396	2.44493	2.42702	2.26767	2.55347	2.07301	1.05172	0.0431406	1	up	yes
MSTRG.13284	MYO7B	ENSSSCT00000017275	GO:0000166(nucleotide binding);GO:0003774(motor activity);GO:0003779(actin binding);GO:0005515(protein binding);GO:0005524(ATP binding);GO:0005856(cytoskeleton);GO:0005902(microvillus);GO:0005903(brush border);GO:0016459(myosin complex);GO:0051015(actin filament binding);GO:0090651(apical cytoplasm);GO:1904970(brush border assembly)	NA	K21868	NA	myosin VIIB [Source:NCBI gene;Acc:100737623]	protein_coding	0.032458	0.073452	0.065339	0.084094	0.03114	0.098858	0.233696	0.092591	0.040617	0.220858	0.417237	-1.26106	0.0431837	1	down	yes
MSTRG.23918	MAB21L3	ENSSSCT00000057433;ENSSSCT00000007387	NA	NA	NA	NA	mab-21 like 3 [Source:NCBI gene;Acc:100154970]	protein_coding	0.0656902	0.160214	0.232996	0.456066	0.131736	0.139526	0.968683	0.0710252	0.0825632	1.82617	0.338961	-1.56081	0.0431932	1	down	yes
MSTRG.31986	CATSPERB	ENSSSCT00000036357	GO:0005929(cilium);GO:0016020(membrane);GO:0016021(integral component of membrane);GO:0036128(CatSper complex)	NA	K16893	NA	cation channel sperm associated auxiliary subunit beta [Source:NCBI gene;Acc:100512175]	protein_coding	0.0128199	0.0590439	0.00704562	0.157196	0.0200488	0.0001	1.91094	0.00588856	0.000403217	0.0287617	0.131625	-2.92549	0.0433485	1	down	yes
MSTRG.13472	CCDC173	ENSSSCT00000052181;ENSSSCT00000017351	NA	NA	NA	NA	coiled-coil domain containing 173 [Source:NCBI gene;Acc:100520768]	protein_coding	0.4301	0.52259	0.450422	0.392348	0.55674	0.459099	1.34034	0.508247	0.614258	2.24858	0.454925	-1.1363	0.0434489	1	down	yes
ENSSSCG00000021527	ATP10B	ENSSSCT00000040037;ENSSSCT00000030114;ENSSSCT00000065600;ENSSSCT00000043591;ENSSSCT00000061138;ENSSSCT00000053135;ENSSSCT00000037735	GO:0000166(nucleotide binding);GO:0000287(magnesium ion binding);GO:0004012(phospholipid-translocating ATPase activity);GO:0005524(ATP binding);GO:0005783(endoplasmic reticulum);GO:0005886(plasma membrane);GO:0015914(phospholipid transport);GO:0016020(membrane);GO:0016021(integral component of membrane);GO:0045332(phospholipid translocation);GO:0045332(phospholipid translocation)	NA	K01530	EC:7.6.2.1	ATPase phospholipid transporting 10B (putative) [Source:NCBI gene;Acc:100626997]	protein_coding	0.0413534	0.195271	0.155008	0.189574	0.0609249	0.167693	0.564967	0.0695184	0.0971197	0.757403	0.387596	-1.36737	0.0435039	1	down	yes
MSTRG.10558	ADGRD1	ENSSSCT00000010684;ENSSSCT00000066096	GO:0004888(transmembrane signaling receptor activity);GO:0004930(G protein-coupled receptor activity);GO:0005886(plasma membrane);GO:0005887(integral component of plasma membrane);GO:0007166(cell surface receptor signaling pathway);GO:0007186(G protein-coupled receptor signaling pathway);GO:0007189(adenylate cyclase-activating G protein-coupled receptor signaling pathway);GO:0016020(membrane);GO:…	NA	K08465	NA	adhesion G protein-coupled receptor D1 [Source:NCBI gene;Acc:100736874]	protein_coding	7.88465	11.2564	13.0687	16.475	18.3933	10.0904	2.18268	10.3439	8.63987	8.22412	1.69899	0.764679	0.0436382	1	up	no
MSTRG.11645	PLAU	ENSSSCT00000055275;ENSSSCT00000011287	GO:0001666(response to hypoxia);GO:0004252(serine-type endopeptidase activity);GO:0005576(extracellular region);GO:0005615(extracellular space);GO:0006508(proteolysis);GO:0008233(peptidase activity);GO:0008236(serine-type peptidase activity);GO:0009986(cell surface);GO:0010469(regulation of signaling receptor activity);GO:0014909(smooth muscle cell migration);GO:0014910(regulation of smooth muscl…	04064(NF-kappa B signaling pathway);04610(Complement and coagulation cascades);05202(Transcriptional misregulation in cancer);05205(Proteoglycans in cancer);05206(MicroRNAs in cancer);05215(Prostate cancer);05215(Prostate cancer)	K01348	EC:3.4.21.73	plasminogen activator, urokinase [Source:NCBI gene;Acc:396985]	protein_coding	8.87483	1.6877	2.50562	3.24601	6.7463	1.79123	4.2765	1.37019	1.24079	2.74053	2.01944	1.01396	0.0438916	1	up	yes
MSTRG.24644	MAFF	ENSSSCT00000028972	GO:0000978(RNA polymerase II proximal promoter sequence-specific DNA binding);GO:0001701(in utero embryonic development);GO:0003677(DNA binding);GO:0003700(DNA-binding transcription factor activity);GO:0005634(nucleus);GO:0005739(mitochondrion);GO:0006355(regulation of transcription, DNA-templated);GO:0035914(skeletal muscle cell differentiation);GO:0043565(sequence-specific DNA binding);GO:00456…	NA	K09037	NA	MAF bZIP transcription factor F [Source:NCBI gene;Acc:100156484]	protein_coding	1.68402	2.10455	6.29713	3.01607	4.60045	1.28415	0.897303	2.97018	2.3187	1.82754	1.9039	0.92896	0.0439337	1	up	no
MSTRG.12383	HABP2	ENSSSCT00000050318;ENSSSCT00000011636	GO:0004252(serine-type endopeptidase activity);GO:0005509(calcium ion binding);GO:0005576(extracellular region);GO:0005615(extracellular space);GO:0006508(proteolysis);GO:0007596(blood coagulation);GO:0008233(peptidase activity);GO:0008236(serine-type peptidase activity);GO:0016787(hydrolase activity);GO:0016787(hydrolase activity)	NA	K08648	EC:3.4.21.-	hyaluronan binding protein 2 [Source:NCBI gene;Acc:100157966]	protein_coding	0.0001	0.0449002	0.0886161	0.146984	0.0720855	0.0307087	0.376401	0.0343364	0.0915918	0.813004	0.262017	-1.93227	0.0439938	1	down	yes
MSTRG.1882	CNDP1	ENSSSCT00000005375	GO:0005829(cytosol);GO:0006508(proteolysis);GO:0008237(metallopeptidase activity);GO:0016787(hydrolase activity);GO:0016805(dipeptidase activity);GO:0032268(regulation of cellular protein metabolic process);GO:0046872(metal ion binding)	00330(Arginine and proline metabolism);00340(Histidine metabolism);00410(beta-Alanine metabolism)	K05604	EC:3.4.13.20	carnosine dipeptidase 1 [Source:NCBI gene;Acc:100516053]	protein_coding	0.056396	0.095401	0.174437	0.163546	0.036817	0.041617	1.27997	0.0001	0.063894	0.844426	0.236141	-2.08228	0.0440926	1	down	yes
MSTRG.30868	CEMIP	ENSSSCT00000049090	GO:0004415(hyalurononglucosaminidase activity);GO:0005540(hyaluronic acid binding);GO:0005737(cytoplasm);GO:0005783(endoplasmic reticulum);GO:0005886(plasma membrane);GO:0007605(sensory perception of sound);GO:0010800(positive regulation of peptidyl-threonine phosphorylation);GO:0030214(hyaluronan catabolic process);GO:0030335(positive regulation of cell migration);GO:0030665(clathrin-coated vesi…	NA	K19031	EC:3.2.1.35	cell migration inducing hyaluronidase 1 [Source:NCBI gene;Acc:100738461]	protein_coding	1.35308	0.421657	1.63573	6.75653	18.5491	3.18622	1.44342	3.76642	1.27886	1.4207	2.58806	1.37187	0.0443014	1	up	yes
MSTRG.15641	SDCBP2	ENSSSCT00000031760;ENSSSCT00000007866	GO:0005515(protein binding);GO:0005546(phosphatidylinositol-4,5-bisphosphate binding);GO:0005730(nucleolus);GO:0005737(cytoplasm);GO:0005886(plasma membrane);GO:0008022(protein C-terminus binding);GO:0008283(cell population proliferation);GO:0016607(nuclear speck);GO:0042802(identical protein binding);GO:0042803(protein homodimerization activity);GO:0046982(protein heterodimerization activity);GO…	NA	NA	NA	syndecan binding protein 2 [Source:NCBI gene;Acc:100513633]	protein_coding	0.0595204	0.208388	0.468062	0.239277	0.771835	0.120975	0.121399	0.141534	0.193709	0.169687	2.33785	1.22518	0.0443476	1	up	yes
MSTRG.6212	PRR15L	ENSSSCT00000026445	NA	NA	NA	NA	proline rich 15 like [Source:NCBI gene;Acc:100626612]	protein_coding	0.328306	0.549053	0.108105	0.792048	0.133377	0.019315	2.44965	0.0147219	0.709851	4.87723	0.236767	-2.07846	0.0444282	1	down	yes
MSTRG.36927	BGN	ENSSSCT00000013956;ENSSSCT00000034816;ENSSSCT00000035115	GO:0005515(protein binding);GO:0005539(glycosaminoglycan binding);GO:0009986(cell surface);GO:0019800(peptide cross-linking via chondroitin 4-sulfate glycosaminoglycan);GO:0030133(transport vesicle);GO:0031012(extracellular matrix);GO:0042383(sarcolemma);GO:0050840(extracellular matrix binding);GO:0050840(extracellular matrix binding)	NA	K08118	NA	biglycan [Source:NCBI gene;Acc:397396]	protein_coding	10.8229	15.92	11.5517	14.5316	19.5995	10.7069	4.39174	7.19804	9.38353	13.7795	1.59318	0.671911	0.0445987	1	up	no
MSTRG.8637	SLC35G2	ENSSSCT00000023130	GO:0005794(Golgi apparatus);GO:0005886(plasma membrane);GO:0016020(membrane);GO:0016021(integral component of membrane)	NA	NA	NA	solute carrier family 35 member G2 [Source:NCBI gene;Acc:100620415]	protein_coding	0.58953	0.7047	0.427489	0.614147	0.506674	1.282	1.15109	0.833985	1.57416	0.778725	0.505793	-0.98338	0.044656	1	down	no
MSTRG.23324	CEBPD	ENSSSCT00000062693	GO:0000978(RNA polymerase II proximal promoter sequence-specific DNA binding);GO:0001228(DNA-binding transcription activator activity, RNA polymerase II-specific);GO:0002244(hematopoietic progenitor cell differentiation);GO:0003677(DNA binding);GO:0003700(DNA-binding transcription factor activity);GO:0005634(nucleus);GO:0005654(nucleoplasm);GO:0006355(regulation of transcription, DNA-templated);G…	NA	K10050	NA	CCAAT enhancer binding protein delta [Source:NCBI gene;Acc:100153946]	protein_coding	5.77015	2.47519	6.75368	9.3771	14.2264	4.4116	4.12173	4.62792	5.3628	3.21755	1.77551	0.828236	0.0447821	1	up	no
MSTRG.34291	CFAP300	ENSSSCT00000016342	NA	NA	NA	NA	cilia and flagella associated protein 300 [Source:NCBI gene;Acc:100520444]	protein_coding	0.982309	1.13034	1.38986	1.30261	0.657877	1.31779	3.21151	1.35634	1.61058	3.49619	0.496978	-1.00875	0.0448357	1	down	yes
MSTRG.8002	CHDH	ENSSSCT00000012537;ENSSSCT00000052066	GO:0008812(choline dehydrogenase activity);GO:0016614(oxidoreductase activity, acting on CH-OH group of donors);GO:0019285(glycine betaine biosynthetic process from choline);GO:0050660(flavin adenine dinucleotide binding);GO:0055114(oxidation-reduction process);GO:0055114(oxidation-reduction process)	00260(Glycine, serine and threonine metabolism);00260(Glycine, serine and threonine metabolism)	K00108	EC:1.1.99.1	choline dehydrogenase [Source:NCBI gene;Acc:100151982]	protein_coding	0.978255	0.68389	1.2733	0.58974	0.650574	1.70335	1.69208	1.24111	1.33659	1.43783	0.563458	-0.827621	0.0449991	1	down	no
MSTRG.1708	FSIP1	ENSSSCT00000058778	NA	NA	NA	NA	fibrous sheath interacting protein 1 [Source:NCBI gene;Acc:100737163]	protein_coding	0.264615	0.673417	0.209439	0.24389	0.269151	0.433613	1.34376	0.575007	0.435717	0.878149	0.452919	-1.14268	0.0451863	1	down	yes
MSTRG.19655	CXCL14	ENSSSCT00000015634	GO:0005576(extracellular region);GO:0005794(Golgi apparatus);GO:0006955(immune response);GO:0008009(chemokine activity);GO:0045662(negative regulation of myoblast differentiation);GO:0048839(inner ear development);GO:0060326(cell chemotaxis);GO:2000503(positive regulation of natural killer cell chemotaxis)	04060(Cytokine-cytokine receptor interaction);04062(Chemokine signaling pathway)	K10033	NA	C-X-C motif chemokine ligand 14 [Source:NCBI gene;Acc:494467]	protein_coding	1.69903	0.550559	9.3528	2.08204	1.48881	1.61557	1.07713	1.49378	1.41633	1.02562	2.28912	1.19479	0.0455073	1	up	yes
MSTRG.11578	ADAMTS14	ENSSSCT00000011243	GO:0004222(metalloendopeptidase activity);GO:0005576(extracellular region);GO:0006508(proteolysis);GO:0008233(peptidase activity);GO:0008237(metallopeptidase activity);GO:0030199(collagen fibril organization)	NA	K08628	EC:3.4.24.-	ADAM metallopeptidase with thrombospondin type 1 motif 14 [Source:NCBI gene;Acc:100153539]	protein_coding	3.28821	0.409608	0.472173	0.51799	0.377198	0.317143	0.5853	0.419053	0.418087	0.530662	2.23111	1.15776	0.0456085	1	up	yes
MSTRG.508	ENPP3	ENSSSCT00000033751	GO:0002276(basophil activation involved in immune response);GO:0003676(nucleic acid binding);GO:0003824(catalytic activity);GO:0004528(phosphodiesterase I activity);GO:0005044(scavenger receptor activity);GO:0005509(calcium ion binding);GO:0006220(pyrimidine nucleotide metabolic process);GO:0006796(phosphate-containing compound metabolic process);GO:0006898(receptor-mediated endocytosis);GO:00069…	00230(Purine metabolism);00240(Pyrimidine metabolism);00500(Starch and sucrose metabolism);00740(Riboflavin metabolism);00760(Nicotinate and nicotinamide metabolism);00770(Pantothenate and CoA biosynthesis)	K01513	3.6.1.9;EC:3.1.4.1	ectonucleotide pyrophosphatase/phosphodiesterase 3 [Source:NCBI gene;Acc:100621671]	protein_coding	0.213519	0.334672	1.3709	0.981614	1.36189	0.730969	4.25695	1.86433	0.314782	3.32883	0.406122	-1.30002	0.0457251	1	down	yes
MSTRG.3013	ENSSSCG00000005437	ENSSSCT00000032943	GO:0003676(nucleic acid binding)	04550(Signaling pathways regulating pluripotency of stem cells)	K17846	NA	Kruppel like factor 4 [Source:NCBI gene;Acc:595111]	protein_coding	1.64504	3.19919	10.6147	4.91521	1.68873	2.6471	1.14071	2.52369	1.32351	3.31029	2.01574	1.01131	0.0459086	1	up	yes
MSTRG.1766	IGF1R	ENSSSCT00000005311;ENSSSCT00000005312	GO:0000166(nucleotide binding);GO:0004672(protein kinase activity);GO:0004713(protein tyrosine kinase activity);GO:0004714(transmembrane receptor protein tyrosine kinase activity);GO:0005009(insulin-activated receptor activity);GO:0005010(insulin-like growth factor-activated receptor activity);GO:0005158(insulin receptor binding);GO:0005515(protein binding);GO:0005520(insulin-like growth factor b…	01521(EGFR tyrosine kinase inhibitor resistance);01522(Endocrine resistance);04010(MAPK signaling pathway);04014(Ras signaling pathway);04015(Rap1 signaling pathway);04066(HIF-1 signaling pathway);04068(FoxO signaling pathway);04114(Oocyte meiosis);04140(Autophagy - animal);04144(Endocytosis);04150(mTOR signaling pathway);04151(PI3K-Akt signaling pathway);04152(AMPK signaling pathway);04211(Longe…	K05087	EC:2.7.10.1	insulin like growth factor 1 receptor [Source:NCBI gene;Acc:397350]	protein_coding	3.67639	4.01441	4.26913	3.34722	2.88399	7.01422	5.85972	8.2406	5.06707	3.19898	0.619156	-0.691626	0.0459994	1	down	no
MSTRG.4830	SLC46A3	ENSSSCT00000049437;ENSSSCT00000041977;ENSSSCT00000010214;ENSSSCT00000048132;ENSSSCT00000057512	GO:0016020(membrane);GO:0016021(integral component of membrane);GO:0055085(transmembrane transport);GO:0055085(transmembrane transport)	NA	K20840	NA	solute carrier family 46 member 3 [Source:NCBI gene;Acc:100154155]	protein_coding	1.82706	1.2729	1.96058	2.2947	1.44755	2.98543	4.68204	2.87394	1.75946	2.44964	0.596779	-0.744731	0.0461041	1	down	no
MSTRG.16186	GATA5	ENSSSCT00000008270	GO:0000790(nuclear chromatin);GO:0000978(RNA polymerase II proximal promoter sequence-specific DNA binding);GO:0000981(DNA-binding transcription factor activity, RNA polymerase II-specific);GO:0001158(enhancer sequence-specific DNA binding);GO:0003180(aortic valve morphogenesis);GO:0003274(endocardial cushion fusion);GO:0003677(DNA binding);GO:0003700(DNA-binding transcription factor activity);GO…	NA	K17896	NA	GATA binding protein 5 [Source:NCBI gene;Acc:100158102]	protein_coding	0.259914	0.246476	0.191724	0.178922	0.013875	0.042743	0.244322	0.0001	0.144802	4.20822	0.191999	-2.38083	0.0461073	1	down	yes
MSTRG.15376	FERMT1	ENSSSCT00000007723	GO:0001954(positive regulation of cell-matrix adhesion);GO:0005829(cytosol);GO:0005925(focal adhesion);GO:0007155(cell adhesion);GO:0007229(integrin-mediated signaling pathway);GO:0010629(negative regulation of gene expression);GO:0030054(cell junction);GO:0030511(positive regulation of transforming growth factor beta receptor signaling pathway);GO:0033630(positive regulation of cell adhesion med…	NA	K17082	NA	fermitin family member 1 [Source:NCBI gene;Acc:100157961]	protein_coding	2.28695	1.28718	1.04329	1.65544	1.26096	1.44772	5.21572	1.29925	1.29674	6.392	0.481351	-1.05484	0.0461305	1	down	yes
MSTRG.28099	PER3	ENSSSCT00000027190	GO:0000122(negative regulation of transcription by RNA polymerase II);GO:0000976(transcription regulatory region sequence-specific DNA binding);GO:0001222(transcription corepressor binding);GO:0005515(protein binding);GO:0005634(nucleus);GO:0005737(cytoplasm);GO:0007623(circadian rhythm);GO:0008134(transcription factor binding);GO:0009416(response to light stimulus);GO:0019900(kinase binding);GO:…	04710(Circadian rhythm);04713(Circadian entrainment)	K21945	NA	period circadian regulator 3 [Source:NCBI gene;Acc:100627898]	protein_coding	3.24885	4.03549	5.7201	5.68683	2.39833	2.27438	1.96671	2.74749	3.86037	2.55468	1.57342	0.653908	0.0462395	1	up	no
MSTRG.33226	HSPA4L	ENSSSCT00000037656;ENSSSCT00000009943;ENSSSCT00000009942;ENSSSCT00000042144;ENSSSCT00000050624	GO:0000166(nucleotide binding);GO:0004672(protein kinase activity);GO:0004674(protein serine/threonine kinase activity);GO:0005515(protein binding);GO:0005524(ATP binding);GO:0005634(nucleus);GO:0005813(centrosome);GO:0005814(centriole);GO:0005829(cytosol);GO:0006468(protein phosphorylation);GO:0007099(centriole replication);GO:0007099(centriole replication)	04068(FoxO signaling pathway);04141(Protein processing in endoplasmic reticulum);04141(Protein processing in endoplasmic reticulum)	K08863;K09485	EC:2.7.11.21	polo like kinase 4 [Source:NCBI gene;Acc:100517044]	protein_coding	3.43254	4.92704	1.9352	2.4064	4.0689	5.33012	7.72529	5.56309	5.8026	3.62996	0.597841	-0.742166	0.0462651	1	down	no
MSTRG.30060	ACOT13	ENSSSCT00000051683;ENSSSCT00000001189	GO:0005739(mitochondrion);GO:0047617(acyl-CoA hydrolase activity);GO:0051289(protein homotetramerization);GO:0120163(negative regulation of cold-induced thermogenesis);GO:0120163(negative regulation of cold-induced thermogenesis)	NA	K17362	EC:3.1.2.-	acyl-CoA thioesterase 13 [Source:NCBI gene;Acc:100514587]	protein_coding	0.918647	1.30155	2.06799	1.34237	1.27302	1.85131	3.23863	2.09207	2.67595	1.92037	0.586125	-0.77072	0.0467218	1	down	no
MSTRG.16049	ZNFX1	ENSSSCT00000030602;ENSSSCT00000022577	GO:0000775(chromosome, centromeric region);GO:0003700(DNA-binding transcription factor activity);GO:0003723(RNA binding);GO:0005634(nucleus);GO:0006355(regulation of transcription, DNA-templated);GO:0008270(zinc ion binding);GO:0030702(chromatin silencing at centromere);GO:0031048(chromatin silencing by small RNA);GO:0031380(nuclear RNA-directed RNA polymerase complex);GO:0031380(nuclear RNA-dire…	NA	NA	NA	zinc finger NFX1-type containing 1 [Source:NCBI gene;Acc:100624243]	protein_coding	9.39459	8.95116	10.1686	41.9655	10.2076	4.02577	10.5984	7.79601	8.018	12.4406	1.88176	0.912081	0.0470587	1	up	no
MSTRG.9439	PARP14	ENSSSCT00000012988;ENSSSCT00000047299;ENSSSCT00000058573	GO:0003676(nucleic acid binding);GO:0003723(RNA binding);GO:0003950(NAD+ ADP-ribosyltransferase activity);GO:0005737(cytoplasm);GO:0005829(cytosol);GO:0006471(protein ADP-ribosylation);GO:0010629(negative regulation of gene expression);GO:0016740(transferase activity);GO:0016757(transferase activity, transferring glycosyl groups);GO:0019899(enzyme binding);GO:0042531(positive regulation of tyrosi…	NA	K15261	EC:2.4.2.30	poly(ADP-ribose) polymerase family member 14 [Source:NCBI gene;Acc:100153948]	protein_coding	1.43179	1.23614	2.34985	19.8746	1.82386	1.18306	3.32924	1.17095	1.11127	3.609	2.568	1.36064	0.0470889	1	up	yes
MSTRG.18341	ENSSSCG00000013788	ENSSSCT00000050173;ENSSSCT00000052620;ENSSSCT00000037921;ENSSSCT00000015065;ENSSSCT00000048123;ENSSSCT00000057839;ENSSSCT00000038430;ENSSSCT00000044389;ENSSSCT00000062772;ENSSSCT00000060533	GO:0004888(transmembrane signaling receptor activity);GO:0004930(G protein-coupled receptor activity);GO:0005509(calcium ion binding);GO:0005887(integral component of plasma membrane);GO:0007166(cell surface receptor signaling pathway);GO:0007186(G protein-coupled receptor signaling pathway);GO:0007189(adenylate cyclase-activating G protein-coupled receptor signaling pathway);GO:0016020(membrane)…	NA	K08443	NA	adhesion G protein-coupled receptor E2-like [Source:NCBI gene;Acc:100516957]	protein_coding	0.0478157	0.0673683	0.302854	0.244344	0.571604	0.315621	2.80609	0.193642	0.110079	0.255977	0.335194	-1.57693	0.0471578	1	down	yes
MSTRG.756	ANKRD6	ENSSSCT00000043370;ENSSSCT00000031111;ENSSSCT00000042924;ENSSSCT00000056510;ENSSSCT00000063190;ENSSSCT00000048502;ENSSSCT00000004778;ENSSSCT00000039423;ENSSSCT00000055894	GO:0005515(protein binding);GO:0005634(nucleus);GO:0005737(cytoplasm);GO:0043231(intracellular membrane-bounded organelle);GO:0046330(positive regulation of JNK cascade);GO:0090090(negative regulation of canonical Wnt signaling pathway);GO:2000096(positive regulation of Wnt signaling pathway, planar cell polarity pathway);GO:2000096(positive regulation of Wnt signaling pathway, planar cell polari…	NA	K21435	NA	ankyrin repeat domain 6 [Source:NCBI gene;Acc:102167335]	protein_coding	1.74648	2.02155	1.55533	1.17518	1.65326	2.25453	2.33168	2.51945	2.51304	3.38365	0.626949	-0.67358	0.0472184	1	down	no
ENSSSCG00000033381	IRF4	ENSSSCT00000041473;ENSSSCT00000057620;ENSSSCT00000040764	GO:0000788(nuclear nucleosome);GO:0000978(RNA polymerase II proximal promoter sequence-specific DNA binding);GO:0001228(DNA-binding transcription activator activity, RNA polymerase II-specific);GO:0003700(DNA-binding transcription factor activity);GO:0005515(protein binding);GO:0005654(nucleoplasm);GO:0006355(regulation of transcription, DNA-templated);GO:0034122(negative regulation of toll-like …	04659(Th17 cell differentiation);04659(Th17 cell differentiation)	K09445	NA	interferon regulatory factor 4 [Source:NCBI gene;Acc:100144625]	protein_coding	0.0934214	0.0421115	0.0333144	0.170305	0.180029	0.0677796	0.847793	0.0205261	0.0441207	0.679006	0.312906	-1.6762	0.0473644	1	down	yes
ENSSSCG00000006957	RHPN1	ENSSSCT00000007622	GO:0005515(protein binding);GO:0007165(signal transduction)	NA	NA	NA	rhophilin Rho GTPase binding protein 1 [Source:NCBI gene;Acc:100517344]	protein_coding	0.058976	0.243734	0.069203	0.103795	0.152576	0.298956	0.200609	0.100674	0.150726	0.856109	0.390949	-1.35495	0.0477038	1	down	yes
MSTRG.16890	ENSSSCG00000033190	ENSSSCT00000055832	GO:0003094(glomerular filtration);GO:0005372(water transmembrane transporter activity);GO:0005886(plasma membrane);GO:0005901(caveola);GO:0005903(brush border);GO:0006813(potassium ion transport);GO:0006833(water transport);GO:0009925(basal plasma membrane);GO:0015079(potassium ion transmembrane transporter activity);GO:0015267(channel activity);GO:0016020(membrane);GO:0016021(integral component …	04924(Renin secretion);04964(Proximal tubule bicarbonate reclamation);04976(Bile secretion)	K09864	NA	aquaporin 1 (Colton blood group) [Source:NCBI gene;Acc:407773]	protein_coding	2.36311	1.75888	8.80425	8.34292	10.7072	2.68871	2.56566	2.61005	1.50988	6.81572	1.97507	0.981903	0.0478547	1	up	no
MSTRG.11555	TSPAN15	ENSSSCT00000040027;ENSSSCT00000065381	GO:0005886(plasma membrane);GO:0009986(cell surface);GO:0016020(membrane);GO:0016021(integral component of membrane);GO:0019899(enzyme binding);GO:0051604(protein maturation);GO:0072659(protein localization to plasma membrane);GO:0097197(tetraspanin-enriched microdomain);GO:0097197(tetraspanin-enriched microdomain)	NA	K17297	NA	tetraspanin 15 [Source:NCBI gene;Acc:110256602]	protein_coding	4.57434	0.804948	0.929767	2.45161	1.29943	0.898222	26.8475	0.807896	0.90084	2.68283	0.313034	-1.67561	0.0479528	1	down	yes
MSTRG.13087	C4orf47	ENSSSCT00000061654;ENSSSCT00000017197	GO:0005813(centrosome);GO:0005813(centrosome)	NA	NA	NA	chromosome 15 C4orf47 homolog [Source:NCBI gene;Acc:100154862]	protein_coding	0.246952	0.202605	0.533648	0.201855	0.385802	0.378711	0.797882	0.575247	0.390883	1.08701	0.486375	-1.03986	0.0479896	1	down	yes
MSTRG.19096	THBS4	ENSSSCT00000015422;ENSSSCT00000015421;ENSSSCT00000029318	GO:0001938(positive regulation of endothelial cell proliferation);GO:0005178(integrin binding);GO:0005509(calcium ion binding);GO:0005576(extracellular region);GO:0005604(basement membrane);GO:0005615(extracellular space);GO:0005783(endoplasmic reticulum);GO:0007155(cell adhesion);GO:0008201(heparin binding);GO:0016525(negative regulation of angiogenesis);GO:0016529(sarcoplasmic reticulum);GO:003…	04145(Phagosome);04151(PI3K-Akt signaling pathway);04510(Focal adhesion);04512(ECM-receptor interaction);05144(Malaria);05165(Human papillomavirus infection);05165(Human papillomavirus infection)	K04659	NA	thrombospondin 4 [Source:NCBI gene;Acc:100513005]	protein_coding	0.581861	2.4113	0.802925	0.979236	0.577833	0.531906	0.589384	0.568771	0.627318	15.2012	0.30557	-1.71043	0.0480121	1	down	yes
MSTRG.23622	ENSSSCG00000006525;THBS3	ENSSSCT00000007146;ENSSSCT00000057744;ENSSSCT00000007145	GO:0016020(membrane);GO:0016021(integral component of membrane);GO:0016324(apical plasma membrane);GO:0003417(growth plate cartilage development);GO:0005509(calcium ion binding);GO:0005576(extracellular region);GO:0007155(cell adhesion);GO:0008201(heparin binding);GO:0043931(ossification involved in bone maturation);GO:0048471(perinuclear region of cytoplasm);GO:0060346(bone trabecula formation);…	04145(Phagosome);04151(PI3K-Akt signaling pathway);04510(Focal adhesion);04512(ECM-receptor interaction);05144(Malaria);05165(Human papillomavirus infection);05165(Human papillomavirus infection)	K06568;K04659	NA	mucin 1, cell surface associated [Source:NCBI gene;Acc:397382];thrombospondin 3 [Source:NCBI gene;Acc:100155108]	protein_coding	2.68676	2.82178	1.10591	1.53027	1.99749	1.95014	5.97947	1.64647	2.50988	6.93465	0.533222	-0.907191	0.0481605	1	down	no
MSTRG.25261	PKP2	ENSSSCT00000000570	GO:0002159(desmosome assembly);GO:0005080(protein kinase C binding);GO:0005515(protein binding);GO:0005634(nucleus);GO:0005654(nucleoplasm);GO:0005737(cytoplasm);GO:0005882(intermediate filament);GO:0005886(plasma membrane);GO:0005911(cell-cell junction);GO:0005912(adherens junction);GO:0005913(cell-cell adherens junction);GO:0007043(cell-cell junction assembly);GO:0007507(heart development);GO:0…	05412(Arrhythmogenic right ventricular cardiomyopathy (ARVC))	K12642	NA	plakophilin 2 [Source:NCBI gene;Acc:100526169]	protein_coding	0.92063	1.02887	0.722323	0.666408	0.780076	1.2334	2.33947	0.633672	0.747466	2.97795	0.519205	-0.945624	0.0483275	1	down	no
MSTRG.14241	BOK	ENSSSCT00000054528;ENSSSCT00000062532	GO:0001836(release of cytochrome c from mitochondria);GO:0005102(signaling receptor binding);GO:0005634(nucleus);GO:0005737(cytoplasm);GO:0005739(mitochondrion);GO:0005743(mitochondrial inner membrane);GO:0005783(endoplasmic reticulum);GO:0005789(endoplasmic reticulum membrane);GO:0005794(Golgi apparatus);GO:0006915(apoptotic process);GO:0006919(activation of cysteine-type endopeptidase activity …	04215(Apoptosis - multiple species);04215(Apoptosis - multiple species)	K02561	NA	BCL2 family apoptosis regulator BOK [Source:NCBI gene;Acc:110257143]	protein_coding	0.252751	0.757418	0.439061	0.684916	0.289054	0.346924	0.647755	0.541813	0.233988	4.62074	0.379145	-1.39918	0.0483847	1	down	yes
MSTRG.1713	THBS1	ENSSSCT00000005288	GO:0000187(activation of MAPK activity);GO:0001786(phosphatidylserine binding);GO:0001937(negative regulation of endothelial cell proliferation);GO:0001953(negative regulation of cell-matrix adhesion);GO:0001968(fibronectin binding);GO:0002040(sprouting angiogenesis);GO:0002544(chronic inflammatory response);GO:0002581(negative regulation of antigen processing and presentation of peptide or polys…	04015(Rap1 signaling pathway);04115(p53 signaling pathway);04145(Phagosome);04151(PI3K-Akt signaling pathway);04350(TGF-beta signaling pathway);04510(Focal adhesion);04512(ECM-receptor interaction);05144(Malaria);05165(Human papillomavirus infection);05205(Proteoglycans in cancer);05206(MicroRNAs in cancer);05219(Bladder cancer)	K16857	NA	thrombospondin 1 [Source:NCBI gene;Acc:492313]	protein_coding	105.678	226.92	179.909	283.331	265.524	149.404	65.2278	193.707	166.014	44.8125	1.71418	0.77752	0.0483896	1	up	no
MSTRG.10471	ENSSSCG00000029700	ENSSSCT00000031554	GO:0005794(Golgi apparatus)	NA	NA	NA		protein_coding	1.11655	1.07563	3.985	0.9087	1.85192	1.26331	0.641378	0.366462	0.922419	0.748302	2.2674	1.18104	0.0484901	1	up	yes
MSTRG.3865	ENSSSCG00000010884	ENSSSCT00000011908	GO:0016020(membrane);GO:0016021(integral component of membrane)	NA	NA	NA		protein_coding	0.781045	2.61905	1.66693	0.945485	0.256152	2.99861	1.45073	4.05205	2.41372	2.6777	0.461174	-1.11662	0.0485093	1	down	yes
ENSSSCG00000008712	PPP2R2C	ENSSSCT00000009531	GO:0000159(protein phosphatase type 2A complex);GO:0000278(mitotic cell cycle);GO:0004722(protein serine/threonine phosphatase activity);GO:0005515(protein binding);GO:0005829(cytosol);GO:0019888(protein phosphatase regulator activity);GO:0043666(regulation of phosphoprotein phosphatase activity);GO:0070262(peptidyl-serine dephosphorylation)	03015(mRNA surveillance pathway);04071(Sphingolipid signaling pathway);04151(PI3K-Akt signaling pathway);04152(AMPK signaling pathway);04261(Adrenergic signaling in cardiomyocytes);04390(Hippo signaling pathway);04530(Tight junction);04728(Dopaminergic synapse);05142(Chagas disease (American trypanosomiasis));05160(Hepatitis C);05165(Human papillomavirus infection)	K04354	NA	protein phosphatase 2 regulatory subunit Bgamma [Source:NCBI gene;Acc:100737053]	protein_coding	0.182346	0.115649	0.018317	0.259969	0.229303	0.108764	1.21234	0.148995	0.15844	0.661977	0.351704	-1.50757	0.0485741	1	down	yes
MSTRG.11299	KCNK1	ENSSSCT00000011129	GO:0005242(inward rectifier potassium channel activity);GO:0005267(potassium channel activity);GO:0005272(sodium channel activity);GO:0005768(endosome);GO:0005887(integral component of plasma membrane);GO:0006811(ion transport);GO:0006813(potassium ion transport);GO:0016020(membrane);GO:0016021(integral component of membrane);GO:0022841(potassium ion leak channel activity);GO:0030322(stabilizatio…	NA	K04912	NA	potassium two pore domain channel subfamily K member 1 [Source:NCBI gene;Acc:100156432]	protein_coding	0.585809	0.553628	0.217564	0.478053	0.618937	1.11545	0.878559	0.719405	0.375548	2.08979	0.473858	-1.07747	0.0485946	1	down	yes
MSTRG.20819	LITAF	ENSSSCT00000039566;ENSSSCT00000045229	GO:0000978(RNA polymerase II proximal promoter sequence-specific DNA binding);GO:0001817(regulation of cytokine production);GO:0005654(nucleoplasm);GO:0005765(lysosomal membrane);GO:0005794(Golgi apparatus);GO:0005829(cytosol);GO:0005886(plasma membrane);GO:0008270(zinc ion binding);GO:0009898(cytoplasmic side of plasma membrane);GO:0032496(response to lipopolysaccharide);GO:0043231(intracellular…	04142(Lysosome);04142(Lysosome)	K19363	NA	lipopolysaccharide induced TNF factor [Source:NCBI gene;Acc:100518302]	protein_coding	9.54267	7.24284	4.4873	4.48958	8.32301	5.28643	3.84668	4.85609	5.07855	2.52626	1.57847	0.658523	0.0486166	1	up	no
MSTRG.28339	KIF17	ENSSSCT00000003898	GO:0000166(nucleotide binding);GO:0003774(motor activity);GO:0003777(microtubule motor activity);GO:0005524(ATP binding);GO:0005871(kinesin complex);GO:0005874(microtubule);GO:0005929(cilium);GO:0005930(axoneme);GO:0007017(microtubule-based process);GO:0007018(microtubule-based movement);GO:0008017(microtubule binding);GO:0008574(ATP-dependent microtubule motor activity, plus-end-directed);GO:001…	NA	NA	NA	kinesin family member 17 [Source:HGNC Symbol;Acc:HGNC:19167]	protein_coding	0.106782	0.122991	0.123909	0.094364	0.168259	0.033844	0.451172	0.026983	0.06647	1.49276	0.297555	-1.74877	0.0486191	1	down	yes
MSTRG.34167	ME3	ENSSSCT00000016275	GO:0004470(malic enzyme activity);GO:0004471(malate dehydrogenase (decarboxylating) (NAD+) activity);GO:0004473(malate dehydrogenase (decarboxylating) (NADP+) activity);GO:0005739(mitochondrion);GO:0006090(pyruvate metabolic process);GO:0006108(malate metabolic process);GO:0016491(oxidoreductase activity);GO:0046872(metal ion binding);GO:0051287(NAD binding);GO:0055114(oxidation-reduction process)	00620(Pyruvate metabolism)	K00029	EC:1.1.1.40	malic enzyme 3 [Source:NCBI gene;Acc:100520040]	protein_coding	1.91811	3.8359	2.3587	2.83958	2.95524	1.77673	2.16145	1.36906	2.48313	0.993779	1.58325	0.662892	0.0486773	1	up	no
MSTRG.35502	ARPC5	ENSSSCT00000016950	GO:0005200(structural constituent of cytoskeleton);GO:0005737(cytoplasm);GO:0005856(cytoskeleton);GO:0005885(Arp2/3 protein complex);GO:0015629(actin cytoskeleton);GO:0016477(cell migration);GO:0030027(lamellipodium);GO:0030833(regulation of actin filament polymerization);GO:0034314(Arp2/3 complex-mediated actin nucleation);GO:0051015(actin filament binding)	04144(Endocytosis);04666(Fc gamma R-mediated phagocytosis);04810(Regulation of actin cytoskeleton);05100(Bacterial invasion of epithelial cells);05132(Salmonella infection)	K05754	NA	actin related protein 2/3 complex subunit 5 [Source:NCBI gene;Acc:100174965]	protein_coding	9.85916	2.4154	8.29559	2.74257	2.265	10.9942	16.4104	9.94228	1.77794	15.2111	0.470733	-1.08702	0.0489041	1	down	yes
MSTRG.14693	ZSWIM6	ENSSSCT00000030260	GO:0008270(zinc ion binding);GO:0031462(Cul2-RING ubiquitin ligase complex);GO:1902667(regulation of axon guidance)	NA	NA	NA	zinc finger SWIM-type containing 6 [Source:NCBI gene;Acc:100620165]	protein_coding	1.83836	2.86296	2.525	1.08524	3.02252	1.33405	1.70896	0.964728	1.13095	1.89692	1.61096	0.68792	0.0490595	1	up	no
MSTRG.30596	UNC5CL	ENSSSCT00000051272;ENSSSCT00000047987;ENSSSCT00000027240	GO:0005042(netrin receptor activity);GO:0005515(protein binding);GO:0006508(proteolysis);GO:0007165(signal transduction);GO:0008233(peptidase activity);GO:0016020(membrane);GO:0016021(integral component of membrane);GO:0038007(netrin-activated signaling pathway);GO:0043123(positive regulation of I-kappaB kinase/NF-kappaB signaling);GO:0046330(positive regulation of JNK cascade);GO:0046330(positiv…	NA	NA	NA	unc-5 family C-terminal like [Source:NCBI gene;Acc:100737363]	protein_coding	1.54696	1.64646	0.308212	0.962537	1.62603	2.79973	1.3627	1.87937	3.56997	2.19946	0.515629	-0.955596	0.0490663	1	down	no
MSTRG.5277	KLF5	ENSSSCT00000037574	GO:0000122(negative regulation of transcription by RNA polymerase II);GO:0000978(RNA polymerase II proximal promoter sequence-specific DNA binding);GO:0000981(DNA-binding transcription factor activity, RNA polymerase II-specific);GO:0001228(DNA-binding transcription activator activity, RNA polymerase II-specific);GO:0001525(angiogenesis);GO:0003676(nucleic acid binding);GO:0003677(DNA binding);GO…	NA	K09206	NA	Kruppel like factor 5 [Source:NCBI gene;Acc:100038005]	protein_coding	0.610516	0.567905	1.11946	2.00314	0.785196	0.956993	3.33967	0.718639	1.54403	4.15047	0.474913	-1.07427	0.0491609	1	down	yes
MSTRG.19453	HSD17B4	ENSSSCT00000025027;ENSSSCT00000061615;ENSSSCT00000037522	GO:0000038(very long-chain fatty acid metabolic process);GO:0003857(3-hydroxyacyl-CoA dehydrogenase activity);GO:0005102(signaling receptor binding);GO:0005777(peroxisome);GO:0006635(fatty acid beta-oxidation);GO:0008209(androgen metabolic process);GO:0008210(estrogen metabolic process);GO:0016491(oxidoreductase activity);GO:0016508(long-chain-enoyl-CoA hydratase activity);GO:0036111(very long-ch…	00120(Primary bile acid biosynthesis);01040(Biosynthesis of unsaturated fatty acids);04146(Peroxisome);04146(Peroxisome)	K12405	4.2.1.107;4.2.1.119;EC:1.1.1.-	hydroxysteroid 17-beta dehydrogenase 4 [Source:NCBI gene;Acc:397574]	protein_coding	12.6833	8.99266	4.64245	11.5654	6.68027	7.06812	70.191	7.73285	9.34061	6.31607	0.44277	-1.17537	0.0495429	1	down	yes
MSTRG.27406	ENSSSCG00000020837	ENSSSCT00000060368;ENSSSCT00000063375;ENSSSCT00000026508	GO:0016020(membrane);GO:0016021(integral component of membrane);GO:0016021(integral component of membrane)	NA	K06499	NA	carcinoembryonic antigen related cell adhesion molecule 1 [Source:NCBI gene;Acc:100512285]	protein_coding	0.887122	0.713018	0.894584	0.810786	0.916815	0.579638	2.15128	0.875992	1.29354	3.12048	0.526414	-0.92573	0.0496395	1	down	no
MSTRG.22549	ST3GAL1	ENSSSCT00000047743;ENSSSCT00000006526;ENSSSCT00000035570;ENSSSCT00000061378	GO:0003836(beta-galactoside (CMP) alpha-2,3-sialyltransferase activity);GO:0005794(Golgi apparatus);GO:0006468(protein phosphorylation);GO:0006486(protein glycosylation);GO:0008373(sialyltransferase activity);GO:0016020(membrane);GO:0016021(integral component of membrane);GO:0016740(transferase activity);GO:0016757(transferase activity, transferring glycosyl groups);GO:0097503(sialylation);GO:009…	00512(Mucin type O-glycan biosynthesis);00533(Glycosaminoglycan biosynthesis - keratan sulfate);00603(Glycosphingolipid biosynthesis - globo and isoglobo series);00604(Glycosphingolipid biosynthesis - ganglio series);00604(Glycosphingolipid biosynthesis - ganglio series)	K00780	EC:2.4.99.4	ST3 beta-galactoside alpha-2,3-sialyltransferase 1 [Source:NCBI gene;Acc:445537]	protein_coding	15.7216	8.36663	3.87092	4.88847	4.93064	4.33675	4.4584	5.40955	4.94784	3.49177	1.66833	0.738407	0.0497365	1	up	no
ENSSSCG00000031595	ENSSSCG00000031595	ENSSSCT00000042805;ENSSSCT00000053054;ENSSSCT00000048805;ENSSSCT00000061493;ENSSSCT00000053240;ENSSSCT00000041662	GO:0005615(extracellular space);GO:0005615(extracellular space)	NA	NA	NA	serpin A3-8 [Source:NCBI gene;Acc:106504547]	protein_coding	0.0001	0.31924	0.144463	0.137614	0.135865	0.882178	0.0269496	0.774482	0.154574	0.76055	0.283709	-1.81752	0.0498037	1	down	yes
MSTRG.24409	CERK	ENSSSCT00000061800;ENSSSCT00000036935	GO:0000287(magnesium ion binding);GO:0001729(ceramide kinase activity);GO:0003951(NAD+ kinase activity);GO:0006672(ceramide metabolic process);GO:0016021(integral component of membrane);GO:0016301(kinase activity);GO:0016310(phosphorylation);GO:0046834(lipid phosphorylation);GO:0046834(lipid phosphorylation)	00600(Sphingolipid metabolism);00600(Sphingolipid metabolism)	K04715	EC:2.7.1.138	ceramide kinase [Source:NCBI gene;Acc:110260834]	protein_coding	1.90611	4.02218	2.02577	4.95147	4.59715	2.00422	2.28876	1.85776	2.29882	2.21318	1.64148	0.714998	0.0498631	1	up	no
MSTRG.24079	KIAA1324	ENSSSCT00000056727;ENSSSCT00000007487;ENSSSCT00000063577	GO:0000045(autophagosome assembly);GO:0005764(lysosome);GO:0005770(late endosome);GO:0005802(trans-Golgi network);GO:0005886(plasma membrane);GO:0005887(integral component of plasma membrane);GO:0009267(cellular response to starvation);GO:0016020(membrane);GO:0016021(integral component of membrane);GO:0044090(positive regulation of vacuole organization);GO:2000786(positive regulation of autophago…	NA	NA	NA	KIAA1324 ortholog [Source:NCBI gene;Acc:100154257]	protein_coding	0.534842	0.007085	0.068028	2.40354	0.027323	0.08198	26.9685	0.0001	0.013911	0.562471	0.110067	-3.18355	0.0502202	1	down	no
MSTRG.3493	AK8	ENSSSCT00000039033;ENSSSCT00000045636	GO:0004017(adenylate kinase activity);GO:0004127(cytidylate kinase activity);GO:0004550(nucleoside diphosphate kinase activity);GO:0005524(ATP binding);GO:0005930(axoneme);GO:0006139(nucleobase-containing compound metabolic process);GO:0006165(nucleoside diphosphate phosphorylation);GO:0009142(nucleoside triphosphate biosynthetic process);GO:0016301(kinase activity);GO:0016310(phosphorylation);GO…	00230(Purine metabolism);00730(Thiamine metabolism);00730(Thiamine metabolism)	K00939	EC:2.7.4.3	adenylate kinase 8 [Source:NCBI gene;Acc:102167403]	protein_coding	0.69806	0.978437	0.577009	0.424448	0.190545	1.00333	1.44378	0.546097	0.691987	2.64826	0.452913	-1.1427	0.0502399	1	down	no
MSTRG.15575	SPEF1	ENSSSCT00000007822;ENSSSCT00000056622	GO:0005515(protein binding);GO:0005737(cytoplasm);GO:0007026(negative regulation of microtubule depolymerization);GO:0008017(microtubule binding);GO:0031514(motile cilium);GO:0060285(cilium-dependent cell motility);GO:0060285(cilium-dependent cell motility)	NA	NA	NA	sperm flagellar 1 [Source:NCBI gene;Acc:100337683]	protein_coding	0.950159	1.01337	1.22834	1.16645	2.14138	1.54403	2.48147	1.04217	2.08382	5.77648	0.502763	-0.992048	0.0502845	1	down	no
MSTRG.16128	ZBP1	ENSSSCT00000008223	GO:0003677(DNA binding);GO:0003723(RNA binding);GO:0003726(double-stranded RNA adenosine deaminase activity);GO:0005634(nucleus);GO:0005737(cytoplasm);GO:0005829(cytosol)	04217(Necroptosis);04623(Cytosolic DNA-sensing pathway)	K12965	NA	Z-DNA binding protein 1 [Source:NCBI gene;Acc:100144524]	protein_coding	0.882354	0.421491	0.719561	10.1941	0.384697	0.504211	1.88843	0.385367	0.359557	1.13396	2.95029	1.56086	0.0503457	1	up	no
MSTRG.9221	DGKG	ENSSSCT00000027000;ENSSSCT00000024619;ENSSSCT00000039090	GO:0000166(nucleotide binding);GO:0003951(NAD+ kinase activity);GO:0004143(diacylglycerol kinase activity);GO:0005509(calcium ion binding);GO:0005524(ATP binding);GO:0005886(plasma membrane);GO:0007165(signal transduction);GO:0007205(protein kinase C-activating G protein-coupled receptor signaling pathway);GO:0016301(kinase activity);GO:0016310(phosphorylation);GO:0016740(transferase activity);GO…	00561(Glycerolipid metabolism);00564(Glycerophospholipid metabolism);04070(Phosphatidylinositol signaling system);04072(Phospholipase D signaling pathway);05231(Choline metabolism in cancer);05231(Choline metabolism in cancer)	K00901	EC:2.7.1.107	diacylglycerol kinase gamma [Source:NCBI gene;Acc:100623595]	protein_coding	0.435387	0.394338	1.38021	0.907287	1.25529	0.98393	2.72666	1.1298	0.395278	4.10402	0.468165	-1.09491	0.0504076	1	down	no
MSTRG.31306	NOVA1	ENSSSCT00000040078;ENSSSCT00000051547;ENSSSCT00000043611;ENSSSCT00000063556;ENSSSCT00000031969	GO:0000398(mRNA splicing, via spliceosome);GO:0003676(nucleic acid binding);GO:0003723(RNA binding);GO:0003729(mRNA binding);GO:0005634(nucleus);GO:0005730(nucleolus);GO:0043231(intracellular membrane-bounded organelle);GO:0051252(regulation of RNA metabolic process);GO:0120163(negative regulation of cold-induced thermogenesis);GO:0120163(negative regulation of cold-induced thermogenesis)	NA	K14944	NA	NOVA alternative splicing regulator 1 [Source:NCBI gene;Acc:100158068]	protein_coding	2.38521	1.72849	1.81316	1.82796	1.84833	3.82977	2.15567	3.02357	3.64451	2.77011	0.622626	-0.683561	0.050452	1	down	no
MSTRG.487	VNN2	ENSSSCT00000004618	GO:0006807(nitrogen compound metabolic process);GO:0015939(pantothenate metabolic process);GO:0016811(hydrolase activity, acting on carbon-nitrogen (but not peptide) bonds, in linear amides);GO:0017159(pantetheine hydrolase activity)	00770(Pantothenate and CoA biosynthesis)	K08069	EC:3.5.1.92	vanin 2 [Source:NCBI gene;Acc:100153984]	protein_coding	0.0758004	0.0568731	0.330075	0.719429	0.102283	0.319611	2.17058	0.0945843	0.141849	1.39697	0.311491	-1.68274	0.050494	1	down	no
MSTRG.20707	CRYM	ENSSSCT00000008599	GO:0000122(negative regulation of transcription by RNA polymerase II);GO:0003714(transcription corepressor activity);GO:0005634(nucleus);GO:0005737(cytoplasm);GO:0005739(mitochondrion);GO:0005829(cytosol);GO:0007605(sensory perception of sound);GO:0016639(oxidoreductase activity, acting on the CH-NH2 group of donors, NAD or NADP as acceptor);GO:0042403(thyroid hormone metabolic process);GO:004256…	NA	K18258	EC:1.5.1.25	crystallin mu [Source:NCBI gene;Acc:100525333]	protein_coding	4.4543	6.30996	4.62057	7.18467	5.31219	7.44589	27.4208	2.16303	5.18372	15.2882	0.484886	-1.04428	0.0506776	1	down	no
MSTRG.19927	IL17B	ENSSSCT00000015779	GO:0005125(cytokine activity);GO:0005576(extracellular region);GO:0006954(inflammatory response);GO:0010469(regulation of signaling receptor activity);GO:1900017(positive regulation of cytokine production involved in inflammatory response)	04060(Cytokine-cytokine receptor interaction);04657(IL-17 signaling pathway)	K05490	NA	interleukin 17B [Source:NCBI gene;Acc:102162772]	protein_coding	0.820385	0.889804	1.00378	1.70434	1.74003	1.11315	1.25707	2.25028	1.91677	7.45899	0.439999	-1.18443	0.0507189	1	down	no
MSTRG.11062	RSPH14	ENSSSCT00000011008	GO:0005515(protein binding)	NA	NA	NA	radial spoke head 14 homolog [Source:NCBI gene;Acc:100157115]	protein_coding	0.0001	0.0001	0.485212	0.0908007	0.0233307	0.0001	1.83863	0.0999609	0.0001	3.63755	0.107516	-3.21738	0.0508334	1	down	no
MSTRG.22703	ENPP2	ENSSSCT00000057713;ENSSSCT00000061413;ENSSSCT00000037174;ENSSSCT00000006585	GO:0003676(nucleic acid binding);GO:0003824(catalytic activity);GO:0004528(phosphodiesterase I activity);GO:0004551(nucleotide diphosphatase activity);GO:0004622(lysophospholipase activity);GO:0005044(scavenger receptor activity);GO:0005509(calcium ion binding);GO:0005615(extracellular space);GO:0006644(phospholipid metabolic process);GO:0006898(receptor-mediated endocytosis);GO:0006935(chemotaxi…	00565(Ether lipid metabolism);00565(Ether lipid metabolism)	K01122	EC:3.1.4.39	ectonucleotide pyrophosphatase/phosphodiesterase 2 [Source:NCBI gene;Acc:503658]	protein_coding	0.817322	1.96115	1.34878	1.48567	1.30376	1.36274	5.1614	1.69583	0.635985	4.77392	0.507465	-0.978621	0.0508969	1	down	no
ENSSSCG00000007710	MLXIPL	ENSSSCT00000056116;ENSSSCT00000058451;ENSSSCT00000008453	GO:0000122(negative regulation of transcription by RNA polymerase II);GO:0000978(RNA polymerase II proximal promoter sequence-specific DNA binding);GO:0001227(DNA-binding transcription repressor activity, RNA polymerase II-specific);GO:0003677(DNA binding);GO:0003700(DNA-binding transcription factor activity);GO:0005634(nucleus);GO:0005667(transcription factor complex);GO:0005737(cytoplasm);GO:00…	04931(Insulin resistance);04932(Non-alcoholic fatty liver disease (NAFLD));04932(Non-alcoholic fatty liver disease (NAFLD))	K09113	NA	MLX interacting protein like [Source:NCBI gene;Acc:100170769]	protein_coding	0.0889681	0.00293736	0.0258729	0.0846377	0.0271477	0.0376419	0.524429	0.0191718	0.0626923	0.121498	0.299914	-1.73738	0.0511135	1	down	no
MSTRG.14466	C7	ENSSSCT00000018361	GO:0005515(protein binding);GO:0005579(membrane attack complex);GO:0006955(immune response);GO:0006956(complement activation)	04610(Complement and coagulation cascades);05020(Prion diseases);05322(Systemic lupus erythematosus)	K03996	NA	complement C7 [Source:NCBI gene;Acc:397526]	protein_coding	95.3366	80.5471	198.351	209.184	302.112	135.729	45.6634	136.057	128.12	74.2856	1.70342	0.768432	0.0513747	1	up	no
MSTRG.3904	NR5A2	ENSSSCT00000064670;ENSSSCT00000026077;ENSSSCT00000057795;ENSSSCT00000064152;ENSSSCT00000042649	GO:0000976(transcription regulatory region sequence-specific DNA binding);GO:0000978(RNA polymerase II proximal promoter sequence-specific DNA binding);GO:0000980(RNA polymerase II distal enhancer sequence-specific DNA binding);GO:0001228(DNA-binding transcription activator activity, RNA polymerase II-specific);GO:0003677(DNA binding);GO:0003682(chromatin binding);GO:0003700(DNA-binding transcrip…	04950(Maturity onset diabetes of the young);04950(Maturity onset diabetes of the young)	K08027	NA	nuclear receptor subfamily 5 group A member 2 [Source:NCBI gene;Acc:100523688]	protein_coding	101.627	22.5438	0.506987	9.68911	6.38187	2.86479	23.9319	3.75271	10.8577	2.24215	3.22454	1.68909	0.051378	1	up	no
MSTRG.8729	DIPK2A	ENSSSCT00000058048	GO:0000139(Golgi membrane);GO:0005576(extracellular region);GO:0005615(extracellular space);GO:0014066(regulation of phosphatidylinositol 3-kinase signaling);GO:0030126(COPI vesicle coat);GO:0030137(COPI-coated vesicle);GO:0034392(negative regulation of smooth muscle cell apoptotic process);GO:0060038(cardiac muscle cell proliferation)	NA	NA	NA	divergent protein kinase domain 2A [Source:NCBI gene;Acc:100517858]	protein_coding	7.43309	6.17214	10.5868	7.12061	5.26474	9.8861	25.1212	8.50568	7.76447	10.7063	0.590112	-0.760939	0.0514063	1	down	no
[truncated: 19,293 more rows]
