# Supplementary material for: Mechanisms of Oogenesis-Related Long Non-coding RNAs in Porcine Ovaries Treated With Recombinant Pig Follicle-Stimulating Hormone
Source: Front Vet Sci. 2022 Feb 24;8:838703. doi: 10.3389/fvets.2021.838703 (PMC8908959; doi:10.3389/fvets.2021.838703)
Supplement: Supplementary file 5 [file Table_5.XLSX]

## Sheet: Sheet1
Supplymentary Table-S5 Differentially expressed lncRNAs
t_id	class_code	chr	strand	start	end	t_name	num_exons	length	gene_id	gene_name	FPKM.Treat1	FPKM.Treat2	FPKM.Treat3	FPKM.Treat4	FPKM.Treat5	FPKM.Control1	FPKM.Control2	FPKM.Control3	FPKM.Control4	FPKM.Control5	fc	log2(fc)	pval	qval	regulation	significant
38318	i	chr17	-	54172222	54342863	MSTRG.16105.2	2	31854	MSTRG.16105	ENSSSCG00000040839	2.01209	5.05342	0.0001	0.979152	1.05719	0.0001	0.0001	0.000243	0.0001	0.0001	14155.4	13.7891	2.38971e-11	2.30941e-07	up	yes
32689	j	chr15	+	96313874	96324447	MSTRG.13700.7	4	5977	MSTRG.13700	NABP1	0.0001	0.0001	0.0001	0.0001	0.0001	3.46418	0.595905	5.2735	4.70011	0.0001	3.56283e-05	-14.7766	1.31067e-09	7.59981e-06	down	yes
29554	u	chr14	-	123546470	123547465	MSTRG.12382.1	1	996	MSTRG.12382	.	5.62499	8.53791	12.1427	0.0001	10.7285	0.0001	0.0001	0.0001	0.0001	0.0001	74068.2	16.1766	2.27509e-08	5.73561e-05	up	yes
62161	i	chr5	+	52655017	52664345	MSTRG.25424.2	2	9296	MSTRG.25424	PDE3A	0.0001	0.0001	0.0001	0.0001	0.0001	1.66765	0.0001	0.487534	0.7843	0.817172	0.000133093	-12.8753	4.05614e-08	9.36306e-05	down	yes
75937	o	chr7	+	60733100	60744659	MSTRG.31132.2	2	9910	MSTRG.31132	ENSSSCG00000040041	0.0001	0.0001	0.0001	0.0001	0.0001	0.0001	1.31326	0.247473	1.47944	0.37007	0.000146613	-12.7357	7.54057e-08	0.000132495	down	yes
4940	i	chr1	-	169069645	169119132	MSTRG.2112.5	2	46634	MSTRG.2112	THSD4	0.0001	0.0001	0.0001	0.0001	0.0001	0.0001	0.812261	0.0001	0.846597	3.02254	0.000106801	-13.1928	9.62529e-08	0.000146872	down	yes
87414	i	chrX	+	10329515	10341161	MSTRG.35780.2	2	10676	MSTRG.35780	RAB9A	0.0001	0.000483	0.000235	0.0001	0.000355	2.74981	1.62258	1.21407	0.000653	0.001146	0.000227799	-12.1	3.29438e-07	0.000360418	down	yes
66285	i	chr6	-	47495232	47509446	MSTRG.27269.2	2	14157	MSTRG.27269	ACTN4	0.0001	0.0001	0.0001	0.0001	0.0001	2.75477	2.38641	0.0001	2.48615	0.0001	6.5552e-05	-13.897	3.36016e-07	0.000360806	down	yes
54760	u	chr4	-	3715312	3725873	MSTRG.22511.1	2	10540	MSTRG.22511	.	0.0001	0.0001	2.56875	1.06999	7.52054	0.0001	0.0001	0.0001	0.0001	0.0001	22319	14.446	5.04757e-07	0.000504617	up	yes
79391	i	chr8	-	37364172	37366021	MSTRG.32579.3	1	1850	MSTRG.32579	COMMD8	2.16496	1.42002	2.23895	2.05173	0.0001	0.0001	0.0001	0.0001	0.0001	0.0001	15751.5	13.9432	5.40169e-07	0.000530868	up	yes
35963	o	chr16	-	72742442	72818504	MSTRG.15128.3	2	9735	MSTRG.15128	RF01156	0.522491	0.279701	1.60303	0.000321	3.65646	0.0001	0.0001	0.005424	0.001488	0.0001	840.544	9.71518	6.31721e-07	0.000581424	up	yes
54761	u	chr4	-	3715781	3725868	MSTRG.22511.2	1	10088	MSTRG.22511	.	0.0001	0.0001	1.92209	1.36226	5.15657	0.0001	0.0001	0.0001	0.0001	0.0001	16882.2	14.0432	8.33013e-07	0.00065781	up	yes
77449	u	chr7	+	95528755	95545501	MSTRG.31740.1	2	16725	MSTRG.31740	.	0.0001	0.0001	1.87567	1.43786	0.937438	0.0001	0.0001	0.0001	0.0001	0.0001	8502.34	13.0536	1.0963e-06	0.000789682	up	yes
9633	i	chr10	-	33335040	33349570	MSTRG.4147.2	2	12581	MSTRG.4147	B4GALT1	0.110478	1.38788	0.0001	0.088412	0.149314	0.0001	0.0001	0.0001	0.0001	0.0001	3472.37	11.7617	1.18265e-06	0.000816366	up	yes
83315	i	chr9	+	20477407	20488275	MSTRG.34170.2	2	10839	MSTRG.34170	ME3	0.0001	0.0001	0.0001	0.0001	0.0001	2.60519	0.0001	1.69152	0.0001	1.77576	8.23361e-05	-13.5681	1.2579e-06	0.000848115	down	yes
32964	i	chr15	-	105984375	105994100	MSTRG.13801.3	2	9570	MSTRG.13801	BMPR2	1.72995	1.64597	0.0001	0.0001	2.8381	0.0001	0.0001	0.0001	0.0001	0.0001	12428.4	13.6014	1.48858e-06	0.000969818	up	yes
17115	x	chr12	-	59712294	59816716	MSTRG.7189.1	2	3721	MSTRG.7189	ULK2	0.0001	4.24078	0.0001	4.13199	4.06803	0.0001	0.0001	0.0001	0.0001	0.0001	24882	14.6028	2.82213e-06	0.00152933	up	yes
54873	i	chr4	-	10187720	10196841	MSTRG.22570.2	2	9099	MSTRG.22570	ASAP1	0.0001	0.0001	0.0001	0.0001	0.0001	1.87328	0.0001	2.28802	1.16967	0.0001	9.3788e-05	-13.3802	2.94887e-06	0.00156869	down	yes
18615	i	chr13	+	31948881	31957687	MSTRG.7860.5	2	5320	MSTRG.7860	RHOA	0.0001	0.0001	0.0001	0.0001	0.0001	2.38266	0.0001	0.0001	1.63745	4.73308	5.71207e-05	-14.0956	3.25551e-06	0.00171607	down	yes
9156	i	chr10	-	24580637	24588566	MSTRG.3962.1	1	7930	MSTRG.3962	PPP1R12B	0.0001	0.0001	0.0001	0.0001	0.0001	0.0001	1.22826	0.0001	1.8773	2.07931	9.64308e-05	-13.3401	3.76274e-06	0.00192499	down	yes
34964	x	chr16	-	36229759	36295121	MSTRG.14605.2	3	5569	MSTRG.14605	GPBP1	0.0001	0.0001	0.0001	0.0001	0.0001	0.676328	0.144922	0.0001	1.59626	0.066868	0.00020125	-12.2787	3.89521e-06	0.00196034	down	yes
23411	u	chr13	+	177817770	177830527	MSTRG.9863.7	2	12734	MSTRG.9863	.	0.0001	1.67503	0.727861	0.89587	0.0001	0.0001	0.0001	0.0001	0.0001	0.0001	6597.92	12.6878	4.20013e-06	0.00208154	up	yes
34798	i	chr16	-	30330897	30342426	MSTRG.14536.2	2	10009	MSTRG.14536	PARP8	0.0001	0.0001	0.0001	0.0001	0.0001	0.0001	0.0001	2.326	0.62858	1.24941	0.000118929	-13.0376	4.56967e-06	0.00218981	down	yes
10620	u	chr10	+	59199548	59205267	MSTRG.4599.1	1	5720	MSTRG.4599	.	4.94569	0.159313	0.0001	0.0001	4.75608	0.0001	0.0001	0.0001	0.0001	0.0001	19722.6	14.2676	4.73351e-06	0.00220124	up	yes
31094	i	chr15	+	45627664	45633309	MSTRG.13069.2	2	5580	MSTRG.13069	IRF2	0.0001	0.0001	0.0001	0.0001	0.0001	2.06188	3.25544	0.0001	0.0001	1.36064	7.48709e-05	-13.7052	5.07749e-06	0.00230139	down	yes
43495	i	chr2	+	46614540	46664910	MSTRG.18054.2	2	17470	MSTRG.18054	TEAD1	0.671232	0.001222	0.0001	0.599532	0.059107	0.0001	0.0001	0.0001	0.0001	0.0001	2662.39	11.3785	5.17128e-06	0.00232443	up	yes
42684	i	chr2	-	16348706	16356725	MSTRG.17680.1	1	8020	MSTRG.17680	PHF21A	0.0001	0.0001	3.02538	2.23795	0.26491	0.0001	0.0001	0.0001	0.0001	0.0001	11056.9	13.4327	6.18414e-06	0.00259861	up	yes
47598	i	chr2	-	132677482	132696558	MSTRG.19551.2	3	12556	MSTRG.19551	CHSY3	0.0001	0.0001	0.0001	0.0001	0.0001	0.28084	0.0001	1.39504	1.33404	0.0001	0.000166107	-12.5556	6.78954e-06	0.00273392	down	yes
71106	i	chr6	+	131855471	131866992	MSTRG.29138.1	2	9644	MSTRG.29138	ADGRL2	0.0001	0.0001	0.0001	0.0001	0.0001	0.544175	0.0001	0.793163	0.0001	2.29607	0.000137604	-12.8272	7.4761e-06	0.00298962	down	yes
80775	i	chr8	+	84360060	84371953	MSTRG.33131.2	2	11496	MSTRG.33131	GAB1	0.0001	0.0001	0.0001	5.9e-05	0.0001	3.3508	0.232483	0.0001	0.268595	1e-06	0.000119159	-13.0348	7.74904e-06	0.00301679	down	yes
15183	i	chr12	-	33752463	33764437	MSTRG.6405.7	2	11923	MSTRG.6405	MSI2	0.0001	0.0001	0.0001	0.0001	0.0001	0.0001	1.69832	0.955196	0.0001	0.247478	0.000172343	-12.5024	7.88136e-06	0.00303343	down	yes
49390	u	chr3	-	10429324	10433938	MSTRG.20327.2	2	4587	MSTRG.20327	.	0.0001	0.0001	0.0001	0.0001	0.0001	2.18747	1.74249	2.71491	0.0001	0.0001	7.52437e-05	-13.6981	8.30207e-06	0.00310572	down	yes
40177	i	chr18	+	39035431	39054418	MSTRG.16874.1	3	6389	MSTRG.16874	NPSR1	3.74752	1.35389	0.236707	1.02504	1.38424	0.00752	0.011112	0.053866	0.00675	0.109834	40.9738	5.35663	8.43008e-06	0.0031334	up	yes
44375	i	chr2	-	62256521	62307729	MSTRG.18334.2	2	10024	MSTRG.18334	BRD4	1.31731	4e-05	0.0001	1.52876	0.221867	0.0001	2e-05	0.0001	0.0001	0.0001	7304.95	12.8347	9.33916e-06	0.00342735	up	yes
17783	j	chr13	-	18460393	18485506	MSTRG.7544.2	4	4321	MSTRG.7544	CMTM6	0.007015	0.0001	0.0001	0.000428	0.0001	3.19568	6.66625	2.30584	0.0001	0.000141	0.000636341	-10.6179	1.04144e-05	0.00368851	down	yes
2985	u	chr1	+	110719141	110929360	MSTRG.1296.2	2	21154	MSTRG.1296	.	0.42428	0.0001	0.480083	0.0001	0.324542	0.0001	0.0001	0.0001	0.0001	0.0001	2458.21	11.2634	1.14132e-05	0.00393919	up	yes
46252	i	chr2	+	80778108	80802267	MSTRG.18943.2	2	8329	MSTRG.18943	NSD1	0.604373	0.0001	0.52043	1.10904	0.048012	0.002237	0.0001	0.0001	0.0001	0.0001	865.361	9.75716	1.16383e-05	0.00399312	up	yes
66676	u	chr6	-	50679789	50683288	MSTRG.27386.1	1	3500	MSTRG.27386	.	2.18629	0.0001	2.66306	0.0001	2.40769	0.0001	0.0001	0.0001	0.0001	0.0001	14514.5	13.8252	1.18942e-05	0.00403317	up	yes
24509	u	chr14	-	7365681	7371876	MSTRG.10303.5	2	5888	MSTRG.10303	.	0.0001	0.912809	0.0001	1.20751	1.9881	0.0001	0.0001	0.0001	0.0001	0.0001	8217.24	13.0044	1.3616e-05	0.0044585	up	yes
31807	i	chr15	-	66515397	66534405	MSTRG.13393.1	2	5874	MSTRG.13393	BAZ2B	1.31577	2.25898	0.0001	0.504837	0.0001	0.0001	0.0001	0.0001	0.0001	0.0001	8159.58	12.9943	1.53981e-05	0.0048524	up	yes
2990	u	chr1	-	110813591	110872164	MSTRG.1297.5	2	58487	MSTRG.1297	.	0.0001	0.0001	0.0001	0.0001	0.0001	1.00445	0.0001	0.0001	1.71052	0.0001	0.000184144	-12.4069	1.58361e-05	0.00489109	down	yes
22919	i	chr13	+	148553464	148571353	MSTRG.9693.3	2	16011	MSTRG.9693	NECTIN3	0.0001	0.0001	0.0001	0.0001	0.0001	0.791861	0.0001	0.0001	1.09451	0.045013	0.000258855	-11.9156	1.7134e-05	0.00520156	down	yes
39308	i	chr18	-	10569772	10570370	MSTRG.16464.1	1	599	MSTRG.16464	ZC3HAV1	0.0001	1.66638	2.5358	3.11373	2.0475	0.0001	0.0001	0.0001	0.0001	0.0001	18727	14.1928	1.89888e-05	0.00561759	up	yes
55510	o	chr4	-	36658235	36672647	MSTRG.22865.1	2	13255	MSTRG.22865	ENSSSCG00000040048	1.34837	0.000184	0.000301	0.000186	1.46689	0.000171	0.000226	0.000718	0.000431	0.0001	1710.77	10.7404	1.92621e-05	0.00566952	up	yes
36537	o	chr17	-	13925523	13972084	MSTRG.15346.5	2	5500	MSTRG.15346	SLC23A2	0.585232	0.062513	2.08891	0.0001	0.043591	4e-05	0.0001	0.0001	0.0001	0.0001	6318.96	12.6255	1.9535e-05	0.00572079	up	yes
44391	u	chr2	-	62345501	62347101	MSTRG.18336.1	1	1601	MSTRG.18336	.	0.0001	0.0001	0.0001	0.0001	0.0001	0.0001	3.80153	3.16406	4.62716	0.0001	4.31296e-05	-14.501	2.22413e-05	0.00632175	down	yes
23409	u	chr13	-	177804388	177838136	MSTRG.9866.1	2	33696	MSTRG.9866	.	0.0001	0.0001	0.0001	0.0001	0.0001	0.017397	0.016063	0.175439	0.025832	0.0001	0.00212919	-8.87548	2.3665e-05	0.00662896	down	yes
23691	i	chr13	+	195388970	195395298	MSTRG.9964.2	2	6305	MSTRG.9964	SCAF4	0.0001	1.14352	1.59882	0.353117	0.0001	0.0001	0.0001	0.0001	0.0001	0.0001	6191.3	12.596	2.49139e-05	0.0068372	up	yes
42372	x	chr2	+	13230939	13231238	MSTRG.17600.1	2	277	MSTRG.17600	TMX2	0.0001	0.0001	0.0001	0.0001	0.0001	2.43622	12.9704	4.79891	0.0001	1.99555	2.25214e-05	-15.4383	2.52259e-05	0.0068372	down	yes
11855	o	chr11	+	19356080	19377558	MSTRG.5131.2	2	21200	MSTRG.5131	ENSSSCG00000035316	0.0001	0.0001	0.0001	0.0001	0.0001	0.0001	3.27517	0.0001	1.81816	0.0001	9.81618e-05	-13.3145	2.59807e-05	0.00697803	down	yes
54882	i	chr4	-	10252723	10257653	MSTRG.22574.3	2	4903	MSTRG.22574	ASAP1	0.0001	0.0001	0.0001	0.0001	0.0001	2.10007	0.91152	0.681471	0.0001	0.0001	0.000135382	-12.8507	2.70751e-05	0.00716858	down	yes
60189	u	chr5	-	11376368	11391083	MSTRG.24700.2	3	7232	MSTRG.24700	.	0.0001	0.0001	0.0001	0.0001	0.0001	0.534932	0.99481	0.0001	0.628145	0.0001	0.000231687	-12.0755	2.99454e-05	0.00768299	down	yes
46421	u	chr2	+	84406216	84409892	MSTRG.19010.1	1	3677	MSTRG.19010	.	0.0001	1.33467	1.01504	1.95291	0.0001	0.0001	0.0001	0.0001	0.0001	0.0001	8605.64	13.0711	3.06675e-05	0.0077767	up	yes
65901	i	chr6	+	43976455	43980398	MSTRG.27129.1	2	3923	MSTRG.27129	KIAA0355	0.010385	0.044685	0.0001	0.0001	0.0001	2.07653	0.047015	2.59085	1.41186	1.38734	0.0073693	-7.08426	3.16486e-05	0.00790998	down	yes
46582	i	chr2	+	87472327	87476148	MSTRG.19080.3	2	3548	MSTRG.19080	LHFPL2	0.0001	0.0001	0.0001	0.0001	0.0001	0.0001	1.35023	2.31585	0.761016	0.0001	0.000112936	-13.1122	3.27992e-05	0.00815064	down	yes
17149	i	chr12	-	59979724	59981054	MSTRG.7217.4	2	1305	MSTRG.7217	ENSSSCG00000018046	0.0001	0.0001	0.00347	0.0001	0.001755	2.60081	0.992416	3.23897	0.544017	0.0001	0.000749019	-10.3827	3.43573e-05	0.00823937	down	yes
40186	u	chr18	.	39329229	39330601	MSTRG.16881.1	1	1373	MSTRG.16881	.	1.42177	0.571992	0.191633	0.970515	2.37933	0.0001	0.0001	0.0001	0.031408	0.0001	174.02	7.44311	3.43875e-05	0.00823937	up	yes
72096	x	chr6	-	160588036	160669306	MSTRG.29590.1	2	1955	MSTRG.29590	EPS15	1.59101	0.0001	3.23901	2.56532	0.0001	0.0001	0.0001	0.0001	0.0001	0.0001	14791.1	13.8524	3.54617e-05	0.00842188	up	yes
77109	o	chr7	+	87486735	87911825	MSTRG.31600.1	2	5753	MSTRG.31600	ENSSSCG00000002261	0.0001	0.0001	0.0001	0.0001	0.0001	0.0001	0.0001	2.08893	0.874931	0.103932	0.000162973	-12.5831	4.64234e-05	0.00992531	down	yes
14480	u	chr12	+	21828330	21833722	MSTRG.6112.2	2	2736	MSTRG.6112	.	0.0001	0.0001	0.0001	0.0001	0.0001	0.0001	1.10156	0.109642	0.015762	2.05081	0.000152538	-12.6785	4.74407e-05	0.00996667	down	yes
4835	j	chr1	+	166033176	166058633	MSTRG.2055.7	5	3878	MSTRG.2055	PIAS1	0.0001	0.0001	0.0001	0.0001	0.0001	0.0001	1.52043	1.94656	0.0001	1.57086	9.92447e-05	-13.2986	5.17369e-05	0.0104164	down	yes
58994	i	chr4	+	122194748	122202889	MSTRG.24215.1	1	8142	MSTRG.24215	RWDD3	0.0001	0.025334	0.0001	0.0001	0.0001	2.58913	1.86033	2.97343	0.0001	2.03859	0.00271984	-8.52226	5.38847e-05	0.0106637	down	yes
5095	j	chr1	-	179454934	179461699	MSTRG.2187.1	5	425	MSTRG.2187	ENSSSCG00000038507	0.0001	0.0001	0.0001	0.043944	0.0001	0.0001	0.0001	0.0001	359.587	184.47	8.15061e-05	-13.5827	5.53471e-05	0.0108055	down	yes
58142	u	chr4	-	100091286	100100649	MSTRG.23824.1	1	9364	MSTRG.23824	.	19.8886	0.4878	0.053872	1.30979	0.201078	0.15266	0.152452	0.100807	0.174918	0.048463	34.8659	5.12375	5.81207e-05	0.011309	up	yes
69865	i	chr6	+	89664696	89672101	MSTRG.28631.2	2	6541	MSTRG.28631	PHC2	0.0001	0.0001	0.0001	0.0001	0.0001	0.646641	0.753563	0.423109	0.0001	0.0001	0.000274196	-11.8325	6.54252e-05	0.012228	down	yes
4964	i	chr1	-	169485468	169489795	MSTRG.2127.1	2	2269	MSTRG.2127	MYO9A	0.0001	1.46554	2.1964	0.0001	1.66619	0.0001	0.0001	0.0001	0.0001	0.0001	10656.6	13.3795	6.73958e-05	0.012406	up	yes
58139	x	chr4	+	100083487	100256936	MSTRG.23822.3	3	2732	MSTRG.23822	ENSSSCG00000035936	4.16866	0.324292	0.0001	0.529912	0.0001	0.0001	0.0001	0.0001	0.0001	0.0001	10046.1	13.2944	6.80059e-05	0.0124161	up	yes
70569	u	chr6	-	106001337	106035881	MSTRG.28910.1	1	34545	MSTRG.28910	.	0.0001	0.0001	0.0001	0.0001	0.0001	0.0001	0.060889	0.0001	2.38769	0.0001	0.000204175	-12.2579	6.85216e-05	0.0124161	down	yes
68498	i	chr6	-	69137921	69157232	MSTRG.28129.2	2	17296	MSTRG.28129	RERE	0.0001	0.072811	0.014231	1.10517	0.0001	0.0001	0.0001	0.0001	0.0001	0.0001	2384.83	11.2197	7.52537e-05	0.0133034	up	yes
88761	o	chrX	+	59286752	59309312	MSTRG.36349.3	3	17646	MSTRG.36349	RF01880	0.0001	0.0001	0.0001	0.0001	0.0001	0.0001	0.335085	3.41019	0.0001	0.0001	0.000133491	-12.871	7.63761e-05	0.01342	down	yes
46253	i	chr2	+	80779203	80786226	MSTRG.18943.3	2	5653	MSTRG.18943	NSD1	1.81152	0.0001	0.005606	2.03818	1.96216	0.013543	0.003319	0.008056	0.012897	0.017959	104.306	6.70468	7.75292e-05	0.0134594	up	yes
79480	j	chr8	+	39194530	39207242	MSTRG.32597.3	5	5099	MSTRG.32597	SPATA18	0.033248	0.054369	0.025322	0.081977	0.026906	0.018442	5.86773	0.028708	0.039101	9.12835	0.0147074	-6.08731	8.80002e-05	0.0147711	down	yes
79530	u	chr8	+	40773846	40788576	MSTRG.32639.1	1	14731	MSTRG.32639	.	1.49779	1.67649	0.0001	0.0001	0.0001	0.0001	0.0001	0.0001	0.0001	0.0001	6349.14	12.6323	8.84492e-05	0.0147799	up	yes
30625	i	chr15	+	17861362	17872133	MSTRG.12855.1	1	10772	MSTRG.12855	MGAT5	0.0001	0.0001	0.0001	0.0001	0.0001	1.9974	2.2626	0.0001	0.0001	0.0001	0.000117363	-13.0567	9.46355e-05	0.015501	down	yes
36534	o	chr17	-	13917359	13973811	MSTRG.15346.2	2	6057	MSTRG.15346	SLC23A2	0.0001	0.0001	0.0001	0.0001	0.0001	0.0001	0.705144	0.286437	0.783864	0.0001	0.000281588	-11.7941	0.000103557	0.016317	down	yes
34443	x	chr16	-	18826326	18909023	MSTRG.14352.1	2	6028	MSTRG.14352	NPR3	0.0001	4.66812	0.0001	2.45032	0.0001	0.0001	0.0001	0.0001	0.0001	0.0001	14237.5	13.7974	0.000107395	0.0166503	up	yes
71758	u	chr6	-	154188491	154225377	MSTRG.29424.2	3	34617	MSTRG.29424	.	0.801484	0.0001	0.0001	0.0001	0.42783	0.0001	0.0001	0.0001	0.0001	0.0001	2459.23	11.264	0.000108889	0.016788	up	yes
63420	i	chr5	+	79901003	79931172	MSTRG.25915.4	2	28946	MSTRG.25915	CHST11	0.0001	0.56509	0.0001	0.835702	0.0001	0.0001	0.0001	0.0001	0.0001	0.0001	2802.18	11.4523	0.000115412	0.0172032	up	yes
18900	o	chr13	+	34306593	34406124	MSTRG.7946.1	2	833	MSTRG.7946	ALAS1	0.0001	0.0001	0.0001	0.0001	0.0001	6.46043	0.0001	1.08919	0.0001	5.64003	3.79079e-05	-14.6871	0.000120217	0.0175584	down	yes
58150	u	chr4	-	100222800	100239899	MSTRG.23830.1	1	17100	MSTRG.23830	.	10.9956	0.277994	0.040091	0.810197	0.102098	0.140169	0.051339	0.057296	0.153082	0.060133	26.4621	4.72585	0.000124545	0.0179197	up	yes
83892	i	chr9	.	39288082	39293099	MSTRG.34390.1	1	5018	MSTRG.34390	BTG4	0.0001	0.0001	0.014679	0.0001	0.008402	0.038433	1.67108	0.009817	0.051014	2.37118	0.00564551	-7.46868	0.000130304	0.0183833	down	yes
72391	j	chr6	+	166957329	166979385	MSTRG.29710.8	2	10899	MSTRG.29710	ENSSSCG00000036909	0.003755	1.8961	0.00488	0.008458	1.48492	0.002423	0.011564	0.006487	0.007768	0.00963	89.7262	6.48746	0.000135229	0.0188377	up	yes
87249	u	chrX	-	620544	626944	MSTRG.35713.2	2	4108	MSTRG.35713	.	9.80905	0.713992	0.0001	0.0001	0.0001	0.0001	0.0001	0.0001	0.0001	0.0001	21046.7	14.3613	0.000136486	0.0188878	up	yes
41321	i	chr2	-	5316348	5320470	MSTRG.17330.4	2	3171	MSTRG.17330	KDM2A	0.0001	0.0001	0.0001	0.0001	0.0001	2.65481	0.1127	0.0001	0.0001	0.980146	0.00013341	-12.8719	0.000138239	0.0189265	down	yes
86530	u	chr9	-	119951145	120027578	MSTRG.35408.1	2	31444	MSTRG.35408	.	0.0001	0.0001	0.0001	0.0001	0.0001	0.0001	0.169237	0.075725	0.041866	0.0001	0.00174199	-9.16505	0.000144053	0.0194336	down	yes
84730	o	chr9	+	55684362	55726174	MSTRG.34685.3	2	4186	MSTRG.34685	FLI1	0.0001	0.734396	0.375589	0.93307	0.0001	0.0001	0.0001	0.0001	0.0001	0.0001	4086.51	11.9967	0.000150319	0.0200832	up	yes
30817	i	chr15	-	30558266	30566597	MSTRG.12952.1	2	7755	MSTRG.12952	GLI2	0.0001	0.0001	0.0001	1.92328	1.96783	0.0001	0.0001	0.0001	0.0001	0.0001	7782.82	12.9261	0.000183515	0.0236465	up	yes
14179	o	chr12	-	19714679	19723185	MSTRG.6029.2	2	323	MSTRG.6029	RF00004	0.0001	0.0001	0.0001	0.0001	0.0001	0.0001	3.0713	137.12	0.0001	0.0001	3.56654e-06	-18.097	0.00018495	0.0237786	down	yes
24374	i	chr14	-	3001485	3011537	MSTRG.10231.3	2	9859	MSTRG.10231	ROR2	0.0001	0.0001	2.15198	1.02912	0.0001	0.0001	0.0001	0.0001	0.0001	0.0001	6362.81	12.6354	0.00018746	0.023942	up	yes
81561	i	chr8	-	121736714	121751880	MSTRG.33470.3	2	12977	MSTRG.33470	TSPAN5	0.725052	0.845199	0.0001	0.0001	1.04962	0.0001	0.002814	0.0001	0.0001	0.0001	815.206	9.67102	0.000189736	0.0239644	up	yes
29961	i	chr14	+	134406702	134435735	MSTRG.12527.1	1	29034	MSTRG.12527	CTBP2	0.0001	0.0001	0.0001	0.0001	0.0001	0.0001	0.0001	0.297681	0.765746	0.0001	0.000470045	-11.0549	0.000190529	0.0239644	down	yes
24368	i	chr14	-	2972252	2980195	MSTRG.10235.1	1	7944	MSTRG.10235	ROR2	0.0001	0.0001	0.0001	0.0001	0.0001	0.0001	1.67351	0.0001	1.79732	0.0001	0.000144046	-12.7612	0.000193967	0.0241889	down	yes
40066	i	chr18	-	33511666	33515157	MSTRG.16792.1	2	3098	MSTRG.16792	DOCK4	0.0001	0.0001	5.59175	3.71806	0.0001	0.0001	0.0001	0.0001	0.0001	0.0001	18620.2	14.1846	0.000203862	0.024692	up	yes
37630	u	chr17	-	39322209	39327255	MSTRG.15831.1	1	5047	MSTRG.15831	.	0.0001	0.0001	0.0001	0.0001	0.0001	2.3732	0.0001	0.0001	3.18567	0.0001	8.99415e-05	-13.4407	0.000204151	0.024692	down	yes
6441	i	chr1	+	230729493	230735856	MSTRG.2796.2	2	3457	MSTRG.2796	GNAQ	0.0001	0.0001	0.0001	0.0001	0.0001	0.0001	0.0001	0.480443	1.51935	0.285638	0.000218758	-12.1584	0.000204399	0.024692	down	yes
20963	u	chr13	+	93254983	93269736	MSTRG.8840.2	2	13878	MSTRG.8840	.	0.143315	2.26456	0.0001	0.0001	0.0001	0.0001	0.0001	0.0001	0.0001	0.0001	4816.35	12.2337	0.00020638	0.024692	up	yes
5941	x	chr1	-	206268099	206372131	MSTRG.2541.3	4	41032	MSTRG.2541	BNC2	0.0001	0.590164	0.0001	0.0001	0.12288	0.0001	0.0001	0.0001	0.0001	0.0001	1426.69	10.4785	0.000207831	0.024796	up	yes
31482	i	chr15	-	56288870	56291175	MSTRG.13225.1	1	2306	MSTRG.13225	MFHAS1	2.84881	0.06488	0.026256	0.008554	3.71059	0.0001	0.0001	0.007576	0.032748	0.003983	149.619	7.22515	0.000214212	0.0252161	up	yes
22438	o	chr13	+	138044355	138054253	MSTRG.9446.1	2	8006	MSTRG.9446	KPNA1	0.0001	0.243901	0.523458	0.0001	0.108792	0.0001	0.0001	0.0001	0.0001	0.0001	1752.7	10.7754	0.000240828	0.0274346	up	yes
64481	o	chr6	+	7124382	7139642	MSTRG.26454.3	2	2825	MSTRG.26454	ENSSSCG00000039200	0.0001	0.752441	1.78869	0.130799	0.0001	0.0001	0.0001	0.0001	0.0001	0.0001	5344.27	12.3838	0.000268313	0.0298615	up	yes
37631	u	chr17	-	39322236	39327255	MSTRG.15831.2	2	4676	MSTRG.15831	.	0.0001	0.0001	0.0001	0.0001	0.0001	1.68323	0.0001	0.0001	3.21775	0.0001	0.000102014	-13.2589	0.000272463	0.0301354	down	yes
5126	x	chr1	+	179671811	179686655	MSTRG.2201.4	2	372	MSTRG.2201	RF00017	0.0001	0.0001	0.0001	0.0001	0.0001	45.0624	0.0001	0.0001	0.0001	16.7426	8.08992e-06	-16.9154	0.000274499	0.0301594	down	yes
13040	x	chr12	-	1322479	1322735	MSTRG.5618.1	2	207	MSTRG.5618	ACTG1	15.3628	9.78535	0.107348	0.0001	0.109888	0.0001	0.0001	0.0001	0.0001	0.0001	50731	15.6306	0.000278565	0.0304187	up	yes
36536	o	chr17	-	13924864	13971371	MSTRG.15346.4	2	5446	MSTRG.15346	SLC23A2	0.0001	0.473093	0.0001	0.291863	0.264732	0.0001	0.0001	0.0001	0.0001	0.0001	2059.78	11.0083	0.000280842	0.0304381	up	yes
454	i	chr1	+	10145577	10160873	MSTRG.226.2	2	12037	MSTRG.226	ARID1B	0.0001	0.0001	0.0001	0.0001	0.0001	0.0001	0.0001	0.0001	0.383392	1.503	0.000265014	-11.8816	0.000282387	0.0305483	down	yes
37470	i	chr17	+	37825099	37826997	MSTRG.15761.2	2	1457	MSTRG.15761	ITCH	0.450769	1.91251	1.86942	0.0001	0.0001	0.0001	0.0001	0.0001	0.0001	0.0001	8465.81	13.0474	0.000285257	0.0307539	up	yes
40062	i	chr18	-	33440457	33451771	MSTRG.16790.2	2	11163	MSTRG.16790	DOCK4	0.0001	0.0001	1.25926	0.704168	0.0001	0.0001	0.0001	0.0001	0.0001	0.0001	3927.46	11.9394	0.000295716	0.0312972	up	yes
58137	o	chr4	-	100051624	100106990	MSTRG.23821.1	2	5991	MSTRG.23821	BCL9	15.179	0.387329	0.056474	1.06562	0.05779	0.131819	0.115467	0.152111	0.143502	0.037745	28.8407	4.85003	0.000297769	0.0312972	up	yes
60323	j	chr5	-	14720121	14755742	MSTRG.24760.2	7	1238	MSTRG.24760	C12orf75	0.0001	0.0001	0.0001	0.0001	0.0001	0.0001	18.5949	0.0001	1.22944	0.0001	2.52211e-05	-15.275	0.000298672	0.0312972	down	yes
75441	i	chr7	-	52948143	52954875	MSTRG.30945.1	1	6733	MSTRG.30945	ZSCAN2	0.0001	0.019942	0.025035	0.024308	0.016855	1.68251	0.016629	0.032637	0.611132	1.11443	0.024944	-5.32516	0.000302056	0.0314249	down	yes
58141	u	chr4	+	100086025	100090002	MSTRG.23823.1	1	3978	MSTRG.23823	.	23.1229	0.474501	0.024688	1.53949	0.239742	0.246618	0.063828	0.115091	0.302035	0.099619	30.7079	4.94054	0.000302413	0.0314249	up	yes
6363	u	chr1	+	228393936	228414053	MSTRG.2744.1	2	18424	MSTRG.2744	.	0.099024	0.089742	0.091035	0.118974	2.71074	0.034448	0.032012	0.035459	0.022037	0.034632	19.6075	4.29333	0.000314166	0.0322417	up	yes
32901	i	chr15	.	104975926	104976436	MSTRG.13782.1	1	511	MSTRG.13782	ALS2CR12	0.0001	0.0001	0.0001	0.0001	0.0001	0.196737	1.95911	0.0001	0.084391	2.60216	0.000103253	-13.2415	0.000333995	0.0333368	down	yes
43155	x	chr2	-	32871366	32876758	MSTRG.17916.2	2	4306	MSTRG.17916	LGR4	0.843432	3.72517	0.0001	0.0001	0.0001	0.0001	0.0001	0.0001	0.0001	0.0001	9137.8	13.1576	0.000335854	0.0333368	up	yes
40185	u	chr18	+	39319956	39360514	MSTRG.16880.1	3	4079	MSTRG.16880	.	2.38099	1.1245	0.059894	1.27183	3.22064	0.034475	0.065884	0.059825	0.042288	0.247761	17.8971	4.16165	0.000337208	0.0333368	up	yes
15169	i	chr12	-	33647809	33651534	MSTRG.6399.3	2	2836	MSTRG.6399	MSI2	0.0001	6.04368	0.0001	0.0001	0.77632	0.0001	0.0001	0.0001	0.0001	0.0001	13640.6	13.7356	0.000378407	0.036327	up	yes
58143	u	chr4	+	100107043	100113106	MSTRG.23825.1	1	6064	MSTRG.23825	.	18.049	0.388303	0.013841	1.398	0.105552	0.129104	0.075914	0.166267	0.253842	0.080643	28.2736	4.82139	0.000383683	0.0365859	up	yes
66286	i	chr6	+	47498934	47515069	MSTRG.27270.1	2	16094	MSTRG.27270	ACTN4	0.0001	0.367815	2.24183	0.110278	0.982605	0.0001	0.006361	0.020156	0.0001	0.0001	138.07	7.10926	0.000414767	0.0385414	up	yes
56249	i	chr4	-	67479056	67491488	MSTRG.23183.2	2	11751	MSTRG.23183	ARFGEF1	0.0001	0.0001	0.0001	0.0001	0.0001	0.0001	0.374684	0.0001	0.990513	0.0001	0.000366167	-11.4152	0.000416858	0.0386279	down	yes
31481	i	chr15	-	56283934	56287593	MSTRG.13224.1	1	3660	MSTRG.13224	MFHAS1	3.31277	0.018794	0.0001	0.013815	3.41901	0.0001	0.0001	0.0001	0.016821	0.009133	257.656	8.0093	0.000418917	0.0386279	up	yes
10718	u	chr10	+	60994786	61080450	MSTRG.4642.1	2	6143	MSTRG.4642	.	0.018277	0.030195	0.117447	0.039719	0.116743	1.86721	0.0864	1.89237	0.085092	2.02257	0.0541485	-4.20694	0.000419695	0.0386279	down	yes
26627	x	chr14	-	50065207	50112569	MSTRG.11132.1	2	2364	MSTRG.11132	MAPK1	2.62861	3.46215	0.0001	0.0001	0.0001	0.0001	0.0001	0.0001	0.0001	0.0001	12182.1	13.5725	0.000427602	0.0389843	up	yes
75109	x	chr7	+	46321413	46392153	MSTRG.30790.1	2	2346	MSTRG.30790	TRAM2	3.55345	0.0001	0.0001	2.69837	0.0001	0.0001	0.0001	0.0001	0.0001	0.0001	12504.2	13.6101	0.000430565	0.0390545	up	yes
7132	i	chr1	+	251845532	251856832	MSTRG.3066.2	2	10027	MSTRG.3066	LPAR1	0.0001	0.986591	0.572947	0.0001	0.0001	0.0001	0.0001	0.0001	0.0001	0.0001	3119.68	11.6072	0.00043203	0.0390808	up	yes
65692	u	chr6	-	38137513	38228584	MSTRG.27038.1	2	11207	MSTRG.27038	.	0.0001	0.0001	0.0001	0.0001	0.0001	0.0001	0.0001	0.282527	1.16468	0.0001	0.000345421	-11.4994	0.000452319	0.0405368	down	yes
4907	i	chr1	+	168369423	168374285	MSTRG.2096.1	2	4838	MSTRG.2096	UACA	0.0001	0.0001	0.0001	0.0001	0.0001	0.343562	0.0001	0.215642	0.0001	0.271207	0.000601967	-10.698	0.000454101	0.0406336	down	yes
6368	u	chr1	.	228482691	228493896	MSTRG.2749.1	1	11206	MSTRG.2749	.	0.203825	0.115887	0.099093	0.136254	2.25765	0.04063	0.02348	0.02611	0.02571	0.043273	17.6674	4.14302	0.000478472	0.0421637	up	yes
23494	i	chr13	+	181353776	181378033	MSTRG.9891.19	2	22705	MSTRG.9891	ENSSSCG00000034679	0.0001	0.0001	0.0001	0.0001	0.0001	0.0001	0.0001	0.484959	0.166069	0.0001	0.000767662	-10.3472	0.000479943	0.0422292	down	yes
60274	j	chr5	-	13378295	13397347	MSTRG.24729.1	4	4471	MSTRG.24729	TMEM263	0.006825	0.0001	0.0001	0.0001	0.0001	0.0001	0.0001	9.18569	0.004964	0.559654	0.000740987	-10.3983	0.000488923	0.0428891	down	yes
16595	x	chr12	-	52313940	52401517	MSTRG.7006.2	8	1667	MSTRG.7006	RF00614	0.003164	0.006777	0.0001	0.01922	0.007218	2.62884	0.01753	2.33005	0.015617	0.002003	0.00730451	-7.097	0.000496124	0.0432591	down	yes
89091	i	chrX	+	79390341	79436978	MSTRG.36511.1	2	6685	MSTRG.36511	DIAPH2	0.074075	0.050431	2.5504	1.8587	0.016033	0.006711	0.041682	0.031009	0.048396	0.019771	30.8306	4.94629	0.000519339	0.0444806	up	yes
55645	i	chr4	+	40074387	40097946	MSTRG.22930.1	2	10223	MSTRG.22930	SDC2	0.0001	0.0001	0.0001	0.004085	0.0001	7.24499	0.0001	1.76082	0.0001	0.0001	0.000497995	-10.9716	0.00054113	0.045731	down	yes
76104	i	chr7	-	65308620	65318085	MSTRG.31221.2	2	7150	MSTRG.31221	SPTSSA	0.0001	0.0001	0.0001	0.0001	0.0001	0.0001	0.17138	2.03288	0.0001	0.0001	0.000226802	-12.1063	0.000546923	0.0460273	down	yes
16998	u	chr12	-	57940443	58011772	MSTRG.7154.1	3	15957	MSTRG.7154	.	0.0001	0.0001	0.020518	0.0001	0.0001	0.0001	0.002467	3.16945	5.05297	0.188398	0.00248628	-8.6518	0.000550739	0.0462812	down	yes
24968	x	chr14	+	20690466	20756746	MSTRG.10516.1	2	11981	MSTRG.10516	PALLD	0.0001	0.0001	0.0001	0.0001	0.0001	0.139168	0.0001	0.403975	0.004784	0.0001	0.000912197	-10.0984	0.000555657	0.0463151	down	yes
32963	i	chr15	-	105984323	105989099	MSTRG.13801.2	2	2624	MSTRG.13801	BMPR2	3.30048	1.48662	0.0001	0.0001	0.0001	0.0001	0.0001	0.0001	0.0001	0.0001	9574.8	13.225	0.000556931	0.0463151	up	yes
16953	o	chr12	+	56390111	56432912	MSTRG.7124.1	2	6985	MSTRG.7124	MAP2K4	0.0001	0.0001	3.56184	0.004491	0.147385	0.0001	0.003152	0.0001	0.0001	0.0001	1045.58	10.0301	0.000572983	0.047193	up	yes
82284	u	chr9	+	1022298	1028601	MSTRG.33763.1	3	780	MSTRG.33763	.	0.0001	0.0001	0.0001	0.0001	0.0001	0.0001	2.44902	0.0001	0.167353	2.91743	9.03505e-05	-13.4341	0.000600482	0.0489022	down	yes
66288	i	chr6	+	47500464	47515048	MSTRG.27270.3	2	14541	MSTRG.27270	ACTN4	0.0001	1.65801	0.495445	0.046731	0.358756	0.0001	0.01178	0.0001	0.0001	0.0001	210.102	7.71494	0.000605863	0.0491334	up	yes
54282	x	chr3	-	126696410	126751162	MSTRG.22360.1	2	1528	MSTRG.22360	YWHAQ	6.35716	0.0001	0.0001	7.3329	0.0001	0.0001	0.0001	0.0001	0.0001	0.002707	4406.3	12.1054	0.000617125	0.0498375	up	yes
83958	u	chr9	-	40043017	40079679	MSTRG.34419.1	2	3054	MSTRG.34419	.	3.60304	0.0001	0.600049	0.0001	0.0001	0.0001	0.0001	0.0001	0.0001	0.0001	8406.77	13.0373	0.000632012	0.0506868	up	yes
61197	i	chr5	+	22627022	22669987	MSTRG.25043.2	2	4725	MSTRG.25043	ENSSSCG00000026498	0.0001	0.0001	0.90579	0.0001	1.81476	0.0001	0.0001	0.0001	0.0001	0.0001	5441.7	12.4098	0.000638135	0.0511072	up	yes
54893	i	chr4	-	10524649	10530558	MSTRG.22583.1	1	5910	MSTRG.22583	FAM49B	0.0001	0.0001	0.0001	0.0001	0.0001	1.86766	0.0001	0.0001	0.339847	0.0001	0.000226469	-12.1084	0.00065944	0.0523794	down	yes
58147	u	chr4	+	100157128	100163306	MSTRG.23828.1	2	6109	MSTRG.23828	.	15.3918	0.238999	0.006574	1.16092	0.194732	0.135761	0.056644	0.123929	0.294802	0.052546	25.6041	4.6783	0.000692822	0.0545083	up	yes
42542	i	chr2	-	15092247	15112103	MSTRG.17635.3	3	15581	MSTRG.17635	CELF1	0.0001	0.0001	0.0001	0.0001	0.0001	0.0001	0.125075	0.0001	0.673216	0.0001	0.000626103	-10.6413	0.000729537	0.0568568	down	yes
40188	x	chr18	+	39400837	39419098	MSTRG.16882.2	4	4499	MSTRG.16882	BMPER	2.00529	0.942013	0.227994	1.18784	1.77166	0.0001	0.0001	0.0001	0.096899	0.0001	63.051	5.97845	0.000780705	0.0602775	up	yes
6364	u	chr1	+	228416253	228424370	MSTRG.2745.1	1	8118	MSTRG.2745	.	0.131908	0.147282	0.149463	0.118575	2.34156	0.04288	0.017658	0.048199	0.020985	0.03943	17.0781	4.09407	0.000795895	0.0613623	up	yes
890	i	chr1	-	22241746	22281112	MSTRG.401.1	1	39367	MSTRG.401	HIVEP2	0.419208	0.357421	0.573981	0.589159	0.65399	2.8177	3.6859	0.555218	1.515	3.89738	0.20798	-2.26548	0.000801662	0.0615676	down	yes
31600	x	chr15	-	60047106	60100205	MSTRG.13296.4	2	2200	MSTRG.13296	FMNL2	0.0001	0.000134	8.2e-05	0.0001	0.0001	0.576675	0.301055	0.963478	0.000122	0.0001	0.000280217	-11.8012	0.00082667	0.0629051	down	yes
5119	x	chr1	+	179656229	179686667	MSTRG.2201.1	3	752	MSTRG.2201	NEMF	0.663254	0.773184	0.85355	0.719394	4.87366	1.03715	239.13	0.861861	1.36568	0.586513	0.032443	-4.94595	0.000871171	0.0656025	down	yes
87324	i	chrX	-	6123693	6131258	MSTRG.35744.3	2	7022	MSTRG.35744	ENSSSCG00000012102	0.0001	0.0001	0.0001	0.0001	0.0001	0.0001	0.975088	0.593065	0.0001	0.0001	0.000318785	-11.6151	0.000888029	0.0666988	down	yes
63010	i	chr5	-	69659432	69668739	MSTRG.25752.1	2	9115	MSTRG.25752	CECR2	0.384801	0.0001	0.0001	0.0001	0.830376	0.0001	0.0001	0.0001	0.0001	0.0001	2430.95	11.2473	0.000905879	0.0676016	up	yes
79559	o	chr8	+	41399697	41435455	MSTRG.32651.1	2	2620	MSTRG.32651	KIT	0.0001	0.0001	0.0001	0.0001	0.0001	0.0001	1.05282	0.0001	0.0001	3.08162	0.000120927	-13.0136	0.00091376	0.0681021	down	yes
50901	i	chr3	+	39493609	39495859	MSTRG.20997.1	1	2251	MSTRG.20997	PDPK1	0.0001	0.0001	0.0001	2.90336	1.89309	0.0001	0.0001	0.0001	0.0001	0.0001	9593.5	13.2278	0.000924023	0.0686025	up	yes
84450	i	chr9	-	50259434	50267040	MSTRG.34606.1	2	5451	MSTRG.34606	GRAMD1B	1.39106	0.0001	0.0001	1.72641	0.0001	0.0001	0.001743	0.0001	0.00029	0.0001	1336.38	10.3841	0.000933169	0.0690164	up	yes
10426	i	chr10	-	53269274	53285640	MSTRG.4524.2	2	3120	MSTRG.4524	MLLT10	0.0001	0.0001	0.0001	0.0001	0.0001	0.0001	0.0001	2.28982	1.1943	0.0001	0.000143496	-12.7667	0.000944165	0.069652	down	yes
11632	u	chr11	+	15177789	15181884	MSTRG.5053.2	2	4055	MSTRG.5053	.	0.0001	0.0001	0.0001	0.0001	0.0001	1.06079	0.0001	0.0001	1.50842	0.0001	0.00019459	-12.3273	0.000955687	0.070323	down	yes
21200	i	chr13	.	106447271	106454531	MSTRG.8936.1	1	7261	MSTRG.8936	WDR49	0.012049	0.022929	0.020289	0.006338	0.004645	0.0001	1.47427	0.006784	0.028053	2.04758	0.0186264	-5.74651	0.000958127	0.0704132	down	yes
71815	i	chr6	.	155618967	155627365	MSTRG.29412.1	1	8399	MSTRG.29412	FYB2	0.062759	0.055777	0.155596	0.165899	0.118742	1.49941	0.288938	3.17375	0.058718	1.22745	0.0894284	-3.48312	0.000994116	0.0721437	down	yes
62242	i	chr5	-	56922129	56929449	MSTRG.25452.2	2	5543	MSTRG.25452	EPS8	0.0001	0.0001	0.0001	0.0001	0.0001	0.5248	0.0001	1.27241	0.0001	0.0001	0.000278162	-11.8118	0.00106775	0.0760395	down	yes
41181	x	chr2	+	4373046	4425486	MSTRG.17284.1	3	2422	MSTRG.17284	PPP6R3	0.0001	0.0001	0.097284	0.409579	0.396527	0.0001	0.0001	0.0001	0.0001	0.0001	1807.18	10.8195	0.00107755	0.0762888	up	yes
20167	i	chr13	+	69569650	69574697	MSTRG.8490.2	2	4279	MSTRG.8490	NR2C2	0.0001	1.00981	1.07703	0.0001	0.0001	0.0001	0.0001	0.0001	0.0001	0.0001	4174.27	12.0273	0.00115604	0.0801817	up	yes
75709	i	chr7	+	57307866	57315147	MSTRG.31035.2	2	5769	MSTRG.31035	PEAK1	0.0001	0.0001	0.0001	0.0001	0.0001	0.0001	0.0001	0.420467	0.0001	1.1347	0.000321448	-11.6031	0.00116176	0.0803857	down	yes
33131	u	chr15	-	110695283	110705437	MSTRG.13884.2	3	513	MSTRG.13884	.	0.0001	0.237009	2.20762	2.11149	0.0001	0.0001	0.0001	0.0001	0.0001	0.0001	9112.63	13.1537	0.00117422	0.0811053	up	yes
17914	x	chr13	-	22092310	22151603	MSTRG.7594.1	2	2040	MSTRG.7594	GOLGA4	0.0001	0.0001	0.0001	0.0001	0.0001	0.0001	0.0001	0.0001	1.6102	2.46114	0.0001228	-12.9914	0.00118922	0.0819927	down	yes
40182	i	chr18	+	39177825	39195451	MSTRG.16877.1	1	17627	MSTRG.16877	NPSR1	2.42463	1.57217	0.14165	1.4502	7.90364	0.013676	0.024016	0.059815	0.037772	0.842028	13.8056	3.78718	0.00119702	0.0822262	up	yes
85933	j	chr9	+	102435415	102541227	MSTRG.35153.4	4	1662	MSTRG.35153	ENSSSCG00000031818	0.0001	2.32191	2.86666	0.0001	0.0001	0.0001	0.0001	0.0001	0.0001	0.0001	10377.8	13.3412	0.00120396	0.082518	up	yes
47000	x	chr2	+	105151273	105181019	MSTRG.19247.1	2	2698	MSTRG.19247	CHD1	0.0001	0.981098	2.30479	0.0001	0.0001	0.0001	0.0001	0.0001	0.0001	0.0001	6572.38	12.6822	0.00121065	0.0828787	up	yes
89496	x	chrX	-	94864964	94934409	MSTRG.36650.1	2	1557	MSTRG.36650	PLS3	0.0001	3.20023	0.0001	0.0001	1.73465	0.0001	0.0001	0.0001	0.0001	0.0001	9870.38	13.2689	0.001336	0.0887792	up	yes
48518	i	chr2	+	150647956	150657010	MSTRG.19933.2	2	5762	MSTRG.19933	ENSSSCG00000014435	0.0001	0.0001	0.0001	0.0001	0.0001	0.0001	0.685954	0.637642	0.0001	0.0001	0.000377673	-11.3706	0.00133869	0.0888127	down	yes
26996	o	chr14	-	55879279	55960906	MSTRG.11290.1	2	15677	MSTRG.11290	ENSSSCG00000034844	0.053508	0.002833	0.012675	0.025051	0.041544	0.078028	0.023874	0.022334	3.38604	0.070366	0.0378734	-4.72267	0.00135379	0.0895075	down	yes
25827	x	chr14	+	40215872	40286648	MSTRG.10847.1	2	735	MSTRG.10847	GCN1	0.327134	0.981051	60.8248	7.79734	0.247232	0.675545	0.612635	0.913149	0.824671	0.341191	20.8416	4.38139	0.00139497	0.0913965	up	yes
32965	i	chr15	-	105985960	105994154	MSTRG.13801.4	2	2294	MSTRG.13801	BMPR2	1.13741	1.92576	0.0001	0.0001	0.0001	0.0001	0.0001	0.0001	0.0001	0.0001	6126.95	12.581	0.00143363	0.0927396	up	yes
9800	o	chr10	+	39904251	39969037	MSTRG.4217.7	2	7320	MSTRG.4217	WAC	0.004292	0.0001	0.030769	0.018187	0.004685	0.003212	0.002261	2.44235	1.00757	0.012669	0.0167336	-5.90111	0.00143466	0.0927396	down	yes
16165	i	chr12	+	47625456	47630285	MSTRG.6815.5	2	4789	MSTRG.6815	ENSSSCG00000038989	0.0001	0.0001	0.0001	0.0001	0.0001	0.0001	0.780036	0.0001	0.0001	0.630424	0.000354419	-11.4623	0.00145458	0.0936017	down	yes
935	i	chr1	.	25634832	25643725	MSTRG.418.1	1	8894	MSTRG.418	ECT2L	0.017128	0.05544	0.089004	0.040015	0.050068	0.026855	1.94947	0.044249	0.12235	1.81837	0.0635285	-3.97645	0.00159464	0.0999609	down	yes
76854	j	chr7	+	78553754	78564054	MSTRG.31499.1	5	634	MSTRG.31499	CCNB1IP1	0.196225	0.14078	0.097473	0.001747	0.035938	0.082859	7.06363	3.34052	7.7181	0.0001	0.0259356	-5.26892	0.00162731	0.101789	down	yes
5123	o	chr1	-	179671800	179686694	MSTRG.2202.2	2	303	MSTRG.2202	RF00017	0.0001	11.3145	0.489809	0.179781	0.172515	0.0001	0.0001	2514.4	1516.35	0.306546	0.00301574	-8.37327	0.00168291	0.104254	down	yes
63659	i	chr5	-	86972206	86975227	MSTRG.26011.1	1	3022	MSTRG.26011	CFAP54	0.014424	0.0001	0.103718	0.045519	0.022216	0.047298	1.92092	0.107859	0.084101	2.72402	0.0380772	-4.71493	0.00176837	0.108048	down	yes
73002	u	chr7	+	10867700	10868341	MSTRG.29967.2	2	612	MSTRG.29967	.	42.1607	5.15137	3.98534	6.42488	10.1452	375.212	99.2959	28.9536	20.1472	27.2727	0.123198	-3.02095	0.00199577	0.117724	down	yes
2457	i	chr1	-	94383325	94385214	MSTRG.1088.2	2	1457	MSTRG.1088	SETBP1	0.0001	0.0001	0.0001	0.0001	0.0001	0.0001	0.0001	0.0001	1.20811	2.34195	0.000140831	-12.7938	0.00202586	0.118546	down	yes
83332	i	chr9	-	20904825	20911448	MSTRG.34178.2	2	5116	MSTRG.34178	TMEM135	1.3356	0.000564	1.28675	0.000159	0.0001	0.000301	0.001465	0.0001	0.007334	0.01638	102.547	6.68015	0.00204879	0.119204	up	yes
64466	i	chr6	+	6802908	6805659	MSTRG.26446.1	2	1468	MSTRG.26446	CMIP	0.0001	0.04307	0.0001	0.0001	0.0001	0.0001	0.988402	2.63701	1.998	0.031546	0.00768693	-7.02338	0.0021705	0.124485	down	yes
81593	u	chr8	-	124282988	124290182	MSTRG.33481.1	1	7195	MSTRG.33481	.	0.0001	0.0001	0.0001	0.002032	0.009295	2.29181	0.0001	2.91539	0.0001	0.0001	0.00223274	-8.80697	0.00223372	0.12698	down	yes
49729	j	chr3	+	17113357	17135104	MSTRG.20500.3	6	1364	MSTRG.20500	COX6A2	0.0001	0.0001	0.0001	0.0001	0.0001	0.0001	1.50405	0.0001	1.74522	0.0001	0.000153866	-12.666	0.00229496	0.129321	down	yes
75465	i	chr7	-	53182918	53187337	MSTRG.30913.2	2	2770	MSTRG.30913	CRTC3	0.0001	0.0001	1.34978	0.390075	0.0001	0.0001	0.0001	0.0001	0.0001	0.0001	3480.31	11.765	0.00245186	0.135787	up	yes
42078	i	chr2	-	9208247	9211046	MSTRG.17581.64	3	418	MSTRG.17581	ENSSSCG00000036669	0.973582	6.72334	3.04415	9e-06	0.0001	0.0001	0.0001	0.0001	0.0001	0.072747	146.844	7.19814	0.00249783	0.137937	up	yes
40175	i	chr18	-	39020888	39040251	MSTRG.16872.1	2	19341	MSTRG.16872	NPSR1	0.342872	0.448349	0.025963	1.58673	5.7779	0.339641	0.069821	0.284364	0.02379	0.117613	9.7959	3.29218	0.00254763	0.14042	up	yes
14479	u	chr12	+	21828328	21846278	MSTRG.6112.1	4	831	MSTRG.6112	.	0.0001	0.0001	0.034906	0.0001	0.0001	0.028871	2.62737	0.118554	0.0001	3.06287	0.00604786	-7.36936	0.00257918	0.141286	down	yes
934	i	chr1	.	25610648	25611316	MSTRG.417.1	1	669	MSTRG.417	ECT2L	0.0001	0.0001	0.0367	0.0001	0.0001	0.07207	1.38835	0.110447	0.0001	2.16297	0.0099359	-6.65313	0.00258922	0.141286	down	yes
82088	x	chr8	-	135476905	135478484	MSTRG.33695.1	2	1557	MSTRG.33695	SEC31A	0.0001	0.0001	0.0001	0.0001	0.0001	0.0001	1.01262	0.0001	1.36248	0.0001	0.000210491	-12.214	0.00269267	0.1447	down	yes
37738	o	chr17	-	40609310	40633570	MSTRG.15869.2	4	8192	MSTRG.15869	ENSSSCG00000037248	0.042864	0.155933	0.044716	0.083737	0.0001	3.38346	0.10537	0.08154	0.438252	1.50546	0.0593662	-4.07422	0.00275667	0.146915	down	yes
58149	u	chr4	-	100197773	100199841	MSTRG.23829.1	1	2069	MSTRG.23829	.	13.3917	0.344556	0.0001	0.925836	0.055257	0.057184	0.090945	0.114144	0.207393	0.020687	30.014	4.90757	0.00282727	0.149441	up	yes
12276	i	chr11	+	47728334	47743820	MSTRG.5309.6	2	13295	MSTRG.5309	COMMD6	0.650149	0.0001	0.473227	0.0001	0.007517	0.003874	0.0001	0.0001	0.001029	0.004791	114.321	6.83695	0.00287894	0.15107	up	yes
17596	i	chr13	-	11255997	11301758	MSTRG.7428.2	2	19206	MSTRG.7428	THRB	0.027421	0.024874	0.098396	0.060521	0.031874	1.64139	0.031862	0.051796	0.050857	1.01556	0.087082	-3.52148	0.00289502	0.151639	down	yes
47448	u	chr2	.	125731708	125739779	MSTRG.19486.1	1	8072	MSTRG.19486	.	0.010839	0.010614	0.018229	0.015849	0.04476	0.0001	0.777346	0.018156	0.034119	1.78701	0.0383268	-4.7055	0.00305449	0.157035	down	yes
47669	i	chr2	+	134221548	134221946	MSTRG.19576.1	1	399	MSTRG.19576	ENSSSCG00000014272	3.59898	0.0001	0.0001	0.0001	4.30652	0.0001	0.0001	0.0001	0.0001	0.0001	15811.6	13.9487	0.00308059	0.157518	up	yes
64920	x	chr6	+	17432842	17452884	MSTRG.26680.1	4	2226	MSTRG.26680	NFAT5	0.075263	0.019244	0.041928	0.020672	0.0001	0.03249	1.78371	0.066387	0.125274	2.00303	0.039195	-4.67319	0.00315458	0.159195	down	yes
29308	i	chr14	-	113907068	113909976	MSTRG.12293.2	2	1197	MSTRG.12293	CNNM2	0.0001	0.0001	0.0001	1.81194	0.857293	0.0001	0.0001	0.0001	0.0001	0.0001	5339.06	12.3824	0.00317743	0.160202	up	yes
63550	o	chr5	+	83320262	83389625	MSTRG.25972.1	2	9588	MSTRG.25972	ENSSSCG00000032624	2.44637	2.59736	11.6101	0.81615	9.33944	0.366463	1.3863	0.868122	0.959437	1.62535	5.15004	2.36458	0.00323982	0.162086	up	yes
65531	u	chr6	-	32080756	32084797	MSTRG.26937.1	2	3699	MSTRG.26937	.	0.002674	0.040532	0.079604	0.093302	0.049452	0.0001	3.93898	0.04949	0.023316	4.37736	0.0316553	-4.98141	0.00324835	0.162233	down	yes
74290	j	chr7	+	30320453	30329213	MSTRG.30450.4	7	1440	MSTRG.30450	HMGA1	0.0001	0.0001	0.0001	0.0001	0.0001	0.920675	0.0001	1.08751	0.0001	0.0001	0.000248943	-11.9719	0.00346151	0.169064	down	yes
37428	x	chr17	-	37443228	37467483	MSTRG.15745.1	2	2572	MSTRG.15745	RALY	0.005649	1.47135	0.0001	0.0001	2.34185	0.0001	0.0001	0.010227	0.0001	0.005262	241.88	7.91815	0.00352981	0.171131	up	yes
33700	i	chr15	.	129261425	129264466	MSTRG.14079.1	1	3042	MSTRG.14079	DAW1	0.0001	0.013982	0.016142	0.007188	0.0001	0.0001	1.68956	0.016193	0.0001	2.03909	0.0100164	-6.64149	0.00359843	0.173731	down	yes
47032	u	chr2	.	106039756	106043043	MSTRG.19276.1	1	3288	MSTRG.19276	.	0.0001	0.044121	0.029869	0.0001	0.013908	0.014664	1.26253	0.029963	0.039346	1.88344	0.0272754	-5.19625	0.0036142	0.173961	down	yes
75015	o	chr7	-	41465621	41521145	MSTRG.30762.1	2	851	MSTRG.30762	PLA2G7	0.0001	0.0001	0.0001	0.0001	0.0001	1.63922	0.0001	0.0001	0.0001	1.33004	0.000168375	-12.536	0.00368905	0.176054	down	yes
85234	i	chr9	-	71932164	71937835	MSTRG.34875.1	1	5672	MSTRG.34875	AKAP9	0.0001	0.0001	0.0001	0.0001	0.012197	0.0001	2.13611	0.0001	0.0001	2.92917	0.00248679	-8.6515	0.00383526	0.181242	down	yes
84659	i	chr9	+	53155773	53171342	MSTRG.34657.1	2	5101	MSTRG.34657	CDON	0.005474	2.67344	0.000135	2.48214	0.240382	0.0001	0.048613	0.021148	0.077903	0.047912	27.6047	4.78684	0.00385141	0.181531	up	yes
23692	u	chr13	.	195461822	195462170	MSTRG.9965.1	1	349	MSTRG.9965	.	0.0001	0.0001	0.0001	0.0001	0.0001	0.0001	3.62913	0.0001	0.0001	2.91461	7.64054e-05	-13.676	0.00386047	0.181531	down	yes
80914	u	chr8	+	88191731	88338519	MSTRG.33191.1	3	25283	MSTRG.33191	.	0.408563	0.446302	0.138069	0.316973	0.429491	0.741941	1.32695	0.709594	0.763556	4.04588	0.229232	-2.12512	0.00422402	0.193994	down	yes
17901	o	chr13	+	21860778	21886204	MSTRG.7585.4	2	4488	MSTRG.7585	EPM2AIP1	0.001452	0.009191	0.15697	0.0001	0.004595	0.103318	0.320019	0.0001	11.9619	0.002524	0.0139094	-6.16779	0.00441186	0.200423	down	yes
58138	x	chr4	+	100083487	100256936	MSTRG.23822.2	3	2859	MSTRG.23822	ENSSSCG00000035936	17.2914	0.022081	0.009943	1.64061	0.165625	0.233287	0.167897	0.238739	0.323545	0.146998	17.2267	4.10657	0.00454967	0.204661	up	yes
38123	i	chr17	+	48990831	48999258	MSTRG.16033.1	1	8428	MSTRG.16033	EYA2	0.025952	0.065679	0.037417	0.027261	0.005407	0.005721	0.387198	0.023337	0.020467	2.48189	0.0554085	-4.17375	0.00491944	0.21725	down	yes
43974	x	chr2	-	58591588	58607516	MSTRG.18201.1	2	2626	MSTRG.18201	ENSSSCG00000036970	0.139953	0.249854	0.249466	0.145501	0.225806	2.06966	0.140099	1.60217	1.88804	1.75757	0.135511	-2.88352	0.00498997	0.219362	down	yes
6365	u	chr1	.	228435413	228440760	MSTRG.2746.1	1	5348	MSTRG.2746	.	0.239533	0.175309	0.193081	0.237323	2.60974	0.102207	0.053521	0.120818	0.040546	0.057554	9.222	3.20508	0.00501739	0.2204	up	yes
71817	i	chr6	-	155637229	155639645	MSTRG.29414.1	1	2417	MSTRG.29414	FYB2	0.036198	0.036829	0.137604	0.09364	0.147069	1.48679	0.170303	2.74556	0.017842	0.900983	0.0848148	-3.55954	0.00515851	0.225914	down	yes
66923	u	chr6	-	52881749	52884366	MSTRG.27522.1	1	2618	MSTRG.27522	.	0.096168	0.159447	0.084405	0.070245	0.19103	0.287677	2.24837	0.312459	0.481951	1.38195	0.127598	-2.97032	0.00525309	0.229574	down	yes
74971	u	chr7	+	40682546	40684973	MSTRG.30735.1	1	2428	MSTRG.30735	.	5.69669	2.11552	2.08254	6.27862	2.0473	3.22252	110.221	4.66997	1.98853	6.43096	0.143999	-2.79587	0.00546621	0.236886	down	yes
8620	u	chr10	+	13563782	13602490	MSTRG.3709.5	2	11273	MSTRG.3709	.	0.551714	0.019077	0.001449	0.231462	0.011422	0.0001	0.005615	0.0001	0.017612	0.004593	29.0908	4.86249	0.00576174	0.246742	up	yes
22608	i	chr13	+	141163475	141172934	MSTRG.9514.1	2	9225	MSTRG.9514	IGSF11	0.043566	0.0001	0.0001	0.0001	0.0001	0.405734	0.048171	0.240501	0.712851	0.117211	0.0288402	-5.11577	0.00577221	0.247008	down	yes
72498	j	chr6	+	168629051	168633886	MSTRG.29757.1	3	508	MSTRG.29757	ENSSSCG00000036966	0.0001	0.0001	2.54982	0.0001	5.75285	0.0001	0.003848	0.0001	0.0001	0.0001	1954.56	10.9326	0.00577789	0.247069	up	yes
9031	o	chr10	+	22703120	22773335	MSTRG.3902.1	2	5452	MSTRG.3902	NR5A2	34.3026	0.133966	0.0001	0.455883	2.04488	0.0001	0.417764	0.0001	0.342871	0.110764	42.379	5.40528	0.00621929	0.261318	up	yes
40181	i	chr18	+	39112210	39119604	MSTRG.16876.1	2	5223	MSTRG.16876	NPSR1	1.98018	0.961671	0.154722	0.609344	4.25982	0.027628	0.031422	0.054758	0.016513	0.64455	10.2801	3.36178	0.00660022	0.273557	up	yes
38319	i	chr17	+	54184548	54255938	MSTRG.16104.3	2	69863	MSTRG.16104	ENSSSCG00000040839	0.015908	0.1803	0.087068	0.283991	1.74009	5.45703	0.113866	16.2966	0.105003	1.79688	0.0970727	-3.36479	0.00666803	0.27576	down	yes
20616	u	chr13	+	81950177	81954624	MSTRG.8684.1	3	3653	MSTRG.8684	.	0.0001	0.022829	0.067212	0.0001	0.0001	0.0001	1.39692	0.020227	0.031731	3.82133	0.0171415	-5.86636	0.00691193	0.28384	down	yes
4936	i	chr1	-	169051548	169119132	MSTRG.2112.2	2	54010	MSTRG.2112	THSD4	4.92563	3.23517	6.21834	0.625893	6.43032	0.488285	0.491578	3.13637	0.259998	0.319385	4.56497	2.19061	0.00692966	0.284366	up	yes
73261	u	chr7	.	19232710	19233508	MSTRG.30053.1	1	799	MSTRG.30053	.	0.0001	0.0001	0.0001	0.024507	0.0001	0.0001	1.80603	0.0001	0.053972	1.3012	0.00787845	-6.98787	0.00704519	0.286672	down	yes
47399	u	chr2	+	123471678	123489108	MSTRG.19457.1	1	17431	MSTRG.19457	.	0.023672	0.047948	0.03887	0.049129	0.027491	0.027278	2.36876	0.022598	0.014581	0.013444	0.0764755	-3.70886	0.00714496	0.288907	down	yes
48447	i	chr2	+	149582782	149585449	MSTRG.19897.1	2	414	MSTRG.19897	ENSSSCG00000029257	0.130651	0.247082	0.190186	0.138918	0.124938	0.209438	5.85464	0.503283	0.50292	2.74186	0.08477	-3.5603	0.00730975	0.294544	down	yes
21201	i	chr13	-	106483632	106488681	MSTRG.8937.1	1	5050	MSTRG.8937	WDR49	0.0001	0.015341	0.056756	0.0001	0.006005	0.0001	1.20934	0.009754	0.034157	1.63398	0.0271192	-5.20454	0.00770063	0.307473	down	yes
73064	j	chr7	+	13014762	13043625	MSTRG.29983.1	5	4825	MSTRG.29983	STMND1	0.009034	0.0001	0.049125	0.0001	0.0001	0.0001	1.14792	0.0001	0.053625	3.9222	0.011409	-6.45368	0.00777573	0.309662	down	yes
20000	i	chr13	-	66790458	66791870	MSTRG.8420.1	1	1413	MSTRG.8420	ATP2B2	0.0001	0.0001	0.029207	0.0001	0.0001	0.0001	0.973946	0.0001	0.030519	3.32359	0.00684039	-7.1917	0.00813895	0.320604	down	yes
41319	i	chr2	-	5315210	5322249	MSTRG.17330.2	3	3065	MSTRG.17330	KDM2A	0.004508	4.38712	1.50605	1.28908	0.026708	0.019548	0.226665	0.188997	0.044913	0.019125	14.4487	3.85286	0.00822957	0.323734	up	yes
82167	u	chr8	.	137437768	137443027	MSTRG.33729.1	1	5260	MSTRG.33729	.	0.187064	0.168914	0.065316	0.078177	0.151344	0.209199	1.21883	0.489629	0.276827	2.03572	0.153849	-2.70041	0.00852324	0.332503	down	yes
83637	i	chr9	-	32815055	32830836	MSTRG.34292.2	2	15097	MSTRG.34292	YAP1	0.429425	0.147767	0.47201	0.372305	0.979716	4.32057	3.00083	2.92419	0.120563	0.837868	0.214318	-2.22217	0.00883643	0.342864	down	yes
63931	u	chr5	.	96103158	96105114	MSTRG.26157.1	1	1957	MSTRG.26157	.	0.148546	0.107738	0.12546	0.045527	0.276932	0.965298	0.931977	0.577588	0.501973	2.03893	0.140398	-2.83241	0.00884006	0.342864	down	yes
81129	o	chr8	-	104646251	104692507	MSTRG.33282.1	2	8833	MSTRG.33282	SYNPO2	0.112481	0.485272	0.001262	0.000924	0.0001	0.0001	2.71013	1.34352	3.66635	7.6022	0.0391612	-4.67443	0.0088525	0.343117	down	yes
80913	u	chr8	+	88191731	88270719	MSTRG.33191.2	3	6149	MSTRG.33191	.	0.16847	0.196399	0.019965	0.186759	0.165673	0.558385	0.879752	0.487359	0.533404	1.99419	0.165563	-2.59455	0.00902154	0.348925	down	yes
82643	u	chr9	+	5546138	5574743	MSTRG.33871.2	2	25285	MSTRG.33871	.	0.770977	0.64959	0.624833	0.761724	4.87932	0.389536	0.110137	0.688702	0.378984	0.30655	4.10182	2.03627	0.00935285	0.358437	up	yes
30821	u	chr15	.	30906330	30906901	MSTRG.12924.1	1	572	MSTRG.12924	.	0.0001	0.0001	0.0001	0.016546	0.0001	0.0001	1.82171	0.0001	0.0001	1.53314	0.00505074	-7.62929	0.00982698	0.373155	down	yes
27605	u	chr14	+	72344193	72351765	MSTRG.11543.1	2	6074	MSTRG.11543	.	0.102616	0.0001	0.018161	0.02622	0.007529	0.0001	6.76632	0.016162	0.0001	0.217846	0.0220878	-5.50061	0.00993832	0.376643	down	yes
68872	i	chr6	-	75471780	75476694	MSTRG.28267.1	1	4915	MSTRG.28267	ENSSSCG00000031083	2.3609	2.60799	2.38153	0.273237	0.22581	0.464623	0.213342	0.243909	0.24097	0.258034	5.52438	2.46581	0.0102716	0.387188	up	yes
47447	u	chr2	.	125729246	125730382	MSTRG.19485.1	1	1137	MSTRG.19485	.	0.038474	0.018971	0.104295	0.040472	0.04022	0.042405	1.01947	0.0001	0.113783	3.53636	0.0514487	-4.28072	0.0104498	0.392242	down	yes
70996	u	chr6	.	126608028	126608689	MSTRG.29090.1	1	662	MSTRG.29090	.	25.3361	0.249885	1.48261	3.08918	2.38961	1.16492	0.514341	0.551476	0.450677	1.30706	8.16035	3.02863	0.0106318	0.398238	up	yes
2113	i	chr1	-	76998931	77004592	MSTRG.937.1	1	5662	MSTRG.937	MFSD4B	0.234304	0.160248	0.062062	0.281773	0.267936	0.174114	7.51263	0.232893	0.179335	0.126042	0.122349	-3.03092	0.0114745	0.424594	down	yes
31862	i	chr15	+	67373228	67408866	MSTRG.13369.2	2	34900	MSTRG.13369	RBMS1	0.00435	0.018541	0.038342	0.0001	0.0001	0.02331	0.0001	0.010999	0.010125	2.27056	0.0265359	-5.23591	0.011554	0.426446	down	yes
72010	x	chr6	+	159280147	159283430	MSTRG.29550.1	1	3284	MSTRG.29550	SCP2	0.330184	0.349093	0.465922	0.469909	0.245173	0.602	12.6065	0.228826	0.38896	0.223873	0.132403	-2.917	0.0117061	0.430961	down	yes
56458	u	chr4	+	75257199	75261627	MSTRG.23275.1	1	4429	MSTRG.23275	.	0.113305	0.08619	0.033183	0.185469	0.308476	2.47647	0.028911	2.23701	0.23811	0.745245	0.126904	-2.97819	0.0120125	0.439391	down	yes
57127	i	chr4	.	90612402	90614766	MSTRG.23503.1	1	2365	MSTRG.23503	CFAP45	0.046111	0.035776	0.0001	0.0001	0.053689	0.056895	1.01477	0.0001	0.109404	2.4397	0.0374981	-4.73704	0.012061	0.44067	down	yes
6101	i	chr1	+	216770486	216773154	MSTRG.2608.1	1	2669	MSTRG.2608	ENSSSCG00000040584	1.03438	0.388213	0.820157	1.13791	0.499558	0.899326	20.245	0.844527	0.7206	1.13283	0.162745	-2.61931	0.012086	0.441307	down	yes
10999	x	chr11	+	513295	534134	MSTRG.4736.1	2	11147	MSTRG.4736	PSPC1	0.0001	0.018484	0.088153	0.0001	0.114612	0.003772	0.0001	0.0001	0.000648	0.000642	42.0846	5.39522	0.0126935	0.459439	up	yes
75170	x	chr7	-	46656774	46657079	MSTRG.30799.4	2	283	MSTRG.30799	RF00100	4.6764	419.555	0.0001	0.0001	0.0001	0.0001	0.0001	0.0001	1.847	0.0001	229.636	7.84321	0.0133925	0.475806	up	yes
82601	i	chr9	.	4995417	4998254	MSTRG.33864.1	1	2838	MSTRG.33864	ENSSSCG00000040340	0.03859	0.0001	0.025954	0.031739	0.108453	1.46044	0.0001	0.138733	2.37948	0.037543	0.0510011	-4.29333	0.0134029	0.475806	down	yes
40174	i	chr18	+	39004774	39026880	MSTRG.16871.1	1	22107	MSTRG.16871	NPSR1	2.20181	1.12104	0.451122	1.5538	6.21099	0.294412	0.525144	0.187459	0.346511	1.489	4.05934	2.02124	0.0140405	0.490438	up	yes
63924	u	chr5	.	96076377	96081322	MSTRG.26150.1	1	4946	MSTRG.26150	.	0.310658	0.141646	0.138291	0.090761	0.436954	1.23439	1.29912	0.886033	0.251487	2.08592	0.194254	-2.36398	0.0141759	0.494869	down	yes
82160	u	chr8	.	137353442	137355007	MSTRG.33722.1	1	1566	MSTRG.33722	.	0.130261	0.193615	0.054263	0.029489	0.113081	0.335287	1.20107	0.315	0.300958	1.75249	0.133351	-2.9067	0.0143135	0.49877	down	yes
2115	i	chr1	-	77007924	77010501	MSTRG.939.1	1	2578	MSTRG.939	MFSD4B	0.199532	0.160154	0.093617	0.174319	0.165499	0.1213	5.32892	0.439269	0.215916	0.149303	0.126804	-2.97933	0.014417	0.501706	down	yes
40173	i	chr18	+	38986979	39001290	MSTRG.16870.1	1	14312	MSTRG.16870	NPSR1	1.20951	0.795723	0.257619	0.948906	3.4886	0.211184	0.338123	0.147925	0.185309	0.697578	4.24041	2.0842	0.0148573	0.514014	up	yes
80927	u	chr8	.	88403507	88412658	MSTRG.33204.1	1	9152	MSTRG.33204	.	0.326268	0.419164	0.109022	0.213459	0.390209	0.627234	1.01488	0.809679	0.604113	3.24417	0.231445	-2.11126	0.0150674	0.519113	down	yes
73308	u	chr7	.	19866220	19867344	MSTRG.30140.1	1	1125	MSTRG.30140	.	0.199829	0.90706	0.091229	0.279797	0.450747	3.76347	1.1481	3.11173	1.2356	2.00124	0.171282	-2.54555	0.0151207	0.52064	down	yes
47971	o	chr2	+	140438089	140447372	MSTRG.19693.1	2	3253	MSTRG.19693	EGR1	0.0001	1.42671	0.0001	0.0001	0.0001	0.65908	0.0001	29.1931	32.6069	16.3465	0.0181093	-5.78713	0.0158156	0.539135	down	yes
15920	i	chr12	+	45035143	45039650	MSTRG.6700.3	2	4193	MSTRG.6700	FAM222B	0.0001	0.0001	1.11883	0.404564	0.0001	0.008176	0.0001	0.009327	0.0001	0.0001	85.5862	6.41931	0.0160043	0.544093	up	yes
82163	u	chr8	.	137400598	137403302	MSTRG.33725.1	1	2705	MSTRG.33725	.	0.125419	0.179814	0.125722	0.134766	0.181769	0.123822	1.33888	0.551478	0.262141	2.14203	0.169178	-2.56338	0.0161399	0.547603	down	yes
38411	j	chr17	+	58373276	58382971	MSTRG.16131.2	4	633	MSTRG.16131	C20orf85	0.0001	0.0001	0.3103	0.075097	0.0001	0.0001	7.5054	0.0001	0.063566	12.995	0.0187558	-5.73652	0.0166381	0.560279	down	yes
63921	u	chr5	+	96051929	96061857	MSTRG.26147.1	2	7192	MSTRG.26147	.	0.443285	0.169456	0.282432	0.099922	0.547336	1.68912	1.20142	1.18849	0.33649	2.33549	0.228474	-2.1299	0.0166575	0.560573	down	yes
80915	u	chr8	.	88220384	88230537	MSTRG.33192.1	1	10154	MSTRG.33192	.	0.324779	0.392133	0.045805	0.249364	0.309988	0.792433	0.975324	0.533237	0.673353	2.77135	0.230097	-2.11968	0.0167439	0.561524	down	yes
42079	i	chr2	-	9208247	9211790	MSTRG.17581.63	3	394	MSTRG.17581	ENSSSCG00000036669	0.751907	7.23754	2.27211	0.0001	0.0001	0.0001	0.0001	0.0001	0.0001	0.163481	62.6171	5.96849	0.0169302	0.565393	up	yes
6380	u	chr1	.	228744637	228752688	MSTRG.2761.1	1	8052	MSTRG.2761	.	0.083496	0.110627	0.076079	0.099504	1.7435	0.076696	0.02461	0.017919	0.039863	0.120448	7.55967	2.91832	0.017391	0.576889	up	yes
61206	o	chr5	+	22657670	22799412	MSTRG.25043.6	3	9039	MSTRG.25043	MARS	0.0001	0.087609	0.0001	0.081985	0.062522	0.958318	0.802209	0.171654	0.44181	0.060422	0.09543	-3.38941	0.0175992	0.582463	down	yes
1986	i	chr1	.	73875724	73876334	MSTRG.868.1	1	611	MSTRG.868	SCML4	1.39511	0.924975	2.33067	0.564582	0.0001	0.033859	0.035524	0.199836	0.121385	0.0001	13.3488	3.73864	0.0177641	0.586222	up	yes
90644	u	chrY	.	25271183	25271502	MSTRG.37088.1	1	320	MSTRG.37088	.	36.9915	0.265041	0.987739	3.64704	2.96407	2.42142	0.262534	1.81556	0.134761	0.285433	9.1175	3.18864	0.0178163	0.586537	up	yes
12843	u	chr11	-	79043776	79046649	MSTRG.5535.1	1	2874	MSTRG.5535	.	0.0001	0.0001	0.042715	0.047693	0.0001	0.0001	1.15518	0.01714	0.014952	2.12396	0.0273932	-5.19004	0.0179587	0.58904	down	yes
83893	x	chr9	-	39298848	39301258	MSTRG.34391.1	1	2411	MSTRG.34391	C11orf88	0.0001	0.052924	0.040734	0.0001	0.0001	0.0001	1.28647	0.020431	0.017886	1.99442	0.0283065	-5.14272	0.0180407	0.590334	down	yes
42917	o	chr2	-	26305390	26320767	MSTRG.17800.1	2	1404	MSTRG.17800	EHF	0.031158	0.115443	0.045641	0.0001	0.047471	0.103023	3.03266	0.0001	0.0001	2.65814	0.0413897	-4.59458	0.0185321	0.601502	down	yes
66186	u	chr6	+	46347690	46372686	MSTRG.27236.1	1	24997	MSTRG.27236	.	0.007216	0.012373	0.03867	0.048085	0.001246	0.001929	1.94209	0.001279	0.000809	0.000619	0.055267	-4.17744	0.0185782	0.602481	down	yes
33240	u	chr15	.	115001889	115007353	MSTRG.13914.1	1	5465	MSTRG.13914	.	0.348655	0.572567	0.265227	0.159207	0.464804	2.73896	1.03416	1.99328	0.181294	2.26133	0.220545	-2.18085	0.0187733	0.607325	down	yes
49476	j	chr3	+	11320223	11348666	MSTRG.20357.1	6	3552	MSTRG.20357	EIF4H	18.9784	0.038238	2.40266	1.7432	2.07118	0.198477	0.209269	0.056769	0.135866	2.67435	7.70557	2.9459	0.0188673	0.60981	up	yes
88751	o	chrX	-	59277346	59309345	MSTRG.36348.1	8	19317	MSTRG.36348	RF01881	0.894956	3.4362	0.194481	0.701882	0.302704	10.2476	20.5628	0.671531	0.310515	0.361695	0.171991	-2.5396	0.0193968	0.623106	down	yes
34495	i	chr16	-	20628554	20635451	MSTRG.14404.1	1	6898	MSTRG.14404	PRLR	0.156115	0.322329	0.746581	0.217327	0.026095	2.3079	5.20485	1.09276	0.114569	0.104484	0.166404	-2.58723	0.0194348	0.623981	down	yes
42042	i	chr2	-	9201348	9208986	MSTRG.17581.35	4	709	MSTRG.17581	ENSSSCG00000036669	1.57975	1.2854	5.58195	9.32154	0.823626	1.15782	0.0001	0.040643	0.0001	0.0001	15.5095	3.95508	0.0196128	0.628563	up	yes
56504	u	chr4	+	76890558	76893956	MSTRG.23298.1	1	3399	MSTRG.23298	.	0.095932	0.123302	0.444523	0.222708	0.164789	0.236516	2.42312	0.384147	0.226164	2.63118	0.178145	-2.48888	0.0197827	0.632349	down	yes
52197	u	chr3	+	63828296	63844143	MSTRG.21506.1	2	12201	MSTRG.21506	.	0.751448	1.88668	0.119026	0.123744	0.454403	3.38268	1.31792	4.8647	1.67482	1.9831	0.25223	-1.98719	0.0200458	0.637245	down	yes
33266	i	chr15	.	115885560	115886484	MSTRG.13929.1	1	925	MSTRG.13929	ENSSSCG00000016166	0.165523	0.092621	0.072852	0.024874	0.0001	0.25988	1.71195	0.053253	0.372961	1.25752	0.0973774	-3.36027	0.020125	0.637637	down	yes
42075	i	chr2	-	9206663	9211882	MSTRG.17581.60	3	330	MSTRG.17581	ENSSSCG00000036669	0.0001	0.558891	0.0001	0.0001	1.00486	3.51377	0.695479	6.64456	4.28207	6.97741	0.070729	-3.82155	0.0201255	0.637637	down	yes
42788	u	chr2	.	21230044	21246071	MSTRG.17733.1	1	16028	MSTRG.17733	.	0.130745	0.013022	0.036438	0.027112	0.023807	0.065763	1.66438	0.019791	0.055652	0.031751	0.125793	-2.99088	0.0201737	0.637815	down	yes
20805	x	chr13	+	89406058	89408419	MSTRG.8756.1	2	1396	MSTRG.8756	CP	0.059463	0.0001	0.0001	0.0001	0.0001	2.08543	2.13772	0.0001	0.0001	0.033689	0.0140621	-6.15204	0.0203334	0.641466	down	yes
63925	u	chr5	.	96081693	96088798	MSTRG.26151.1	1	7106	MSTRG.26151	.	0.492095	0.122319	0.230369	0.050129	0.433231	1.59944	1.16566	0.880395	0.246489	2.22793	0.21702	-2.2041	0.0209383	0.656264	down	yes
34966	i	chr16	+	36240787	36246853	MSTRG.14606.2	2	6010	MSTRG.14606	GPBP1	0.40034	1.87017	3.76625	3.07039	1.8347	0.563799	1.01003	0.012469	0.012799	0.13514	6.30932	2.65748	0.0210827	0.65972	up	yes
69155	i	chr6	-	80053689	80057433	MSTRG.28363.4	2	1317	MSTRG.28363	CDC42	0.652531	0.054839	0.0001	0.832094	0.0001	0.034313	0.0001	0.0001	0.0001	0.0001	44.3541	5.471	0.0211536	0.661225	up	yes
51116	i	chr3	-	40461497	40464357	MSTRG.21065.2	2	2795	MSTRG.21065	ENSSSCG00000022963	0.314699	0.003146	0.300614	0.0001	0.0001	0.0001	0.0001	0.0001	0.012076	0.0001	49.5879	5.63192	0.021263	0.66357	up	yes
36186	i	chr17	+	1437778	1445885	MSTRG.15224.1	2	8088	MSTRG.15224	DLC1	5.42731	0.027378	0.014845	5.57638	0.0001	0.0001	0.233229	0.094255	0.0001	0.142579	23.489	4.55391	0.0213771	0.666414	up	yes
20044	i	chr13	+	67717590	67725339	MSTRG.8439.3	2	7570	MSTRG.8439	VGLL4	0.04424	0.032188	0.15198	0.023307	2.05026	0.005489	0.068461	0.05839	0.101026	0.02043	9.07017	3.18113	0.0215423	0.671136	up	yes
42786	u	chr2	.	21200918	21211351	MSTRG.17731.1	1	10434	MSTRG.17731	.	0.105394	0.018125	0.044626	0.043539	0.059432	0.06117	1.8502	0.028326	0.055033	0.04102	0.133177	-2.90858	0.0216114	0.67134	down	yes
24009	i	chr13	-	203261683	203263329	MSTRG.10089.1	1	1647	MSTRG.10089	B3GALT5	0.0001	0.119623	0.073797	0.264038	0.108799	0.606038	1.75154	0.029908	0.301106	2.53309	0.108462	-3.20473	0.0216162	0.67134	down	yes
58356	u	chr4	.	105440027	105442556	MSTRG.23937.1	1	2530	MSTRG.23937	.	0.034581	0.0001	0.164977	0.018188	0.0001	0.0001	0.555859	1.34543	2.31539	0.040253	0.0511967	-4.28781	0.0216533	0.672135	down	yes
47449	u	chr2	.	125750799	125754266	MSTRG.19487.1	1	3468	MSTRG.19487	.	0.012614	0.035655	0.019883	0.0001	0.0001	0.0001	0.489445	0.0001	0.005776	1.93763	0.0280931	-5.15364	0.022045	0.680018	down	yes
80918	u	chr8	.	88248740	88251947	MSTRG.33195.1	1	3208	MSTRG.33195	.	0.266005	0.246324	0.030614	0.36466	0.244208	0.749023	1.03155	0.633044	0.564538	2.8228	0.198555	-2.33239	0.0229643	0.699349	down	yes
64407	i	chr6	.	4278854	4281697	MSTRG.26415.1	1	2844	MSTRG.26415	ATP2C2	0.0001	0.078302	0.034471	0.024557	0.040085	0.0001	0.525784	0.017136	0.022744	2.45995	0.0586688	-4.09126	0.0230905	0.702456	down	yes
18518	u	chr13	+	31563187	31565446	MSTRG.7842.1	2	1599	MSTRG.7842	.	0.448393	0.280724	0.163827	1.00377	0.7231	2.89365	2.44097	2.59015	1.8318	1.97478	0.223318	-2.16283	0.0234705	0.711775	down	yes
33139	i	chr15	-	110706324	110714941	MSTRG.13888.1	1	8618	MSTRG.13888	CREB1	0.066424	0.61997	0.0001	0.051353	0.002541	0.655638	2.64099	3.84826	0.0001	2.43727	0.0772665	-3.69401	0.0235847	0.71449	down	yes
84042	u	chr9	-	41836761	41839589	MSTRG.34450.1	1	2829	MSTRG.34450	.	0.0001	0.0001	0.0001	0.0001	0.0638	0.0001	3.16829	0.092607	0.0001	0.390763	0.0175801	-5.82991	0.0237398	0.71806	down	yes
68355	i	chr6	+	65215292	65217313	MSTRG.28045.1	1	2022	MSTRG.28045	TP73	0.0402	0.0001	0.18214	0.0001	0.0001	0.059105	0.954686	0.024362	0.042654	3.5343	0.0482416	-4.37358	0.023814	0.71806	down	yes
68187	u	chr6	.	63486044	63490014	MSTRG.27921.1	1	3971	MSTRG.27921	.	0.0001	0.139854	0.090595	0.092006	0.023032	0.116767	0.621274	0.049619	0.135668	2.01845	0.117476	-3.08957	0.0239281	0.71963	down	yes
80916	u	chr8	-	88231353	88238403	MSTRG.33193.1	2	6927	MSTRG.33193	.	0.289066	0.282205	0.07453	0.179645	0.212146	0.525685	0.830056	0.523781	0.600997	1.88575	0.237638	-2.07316	0.02411	0.723975	down	yes
12132	u	chr11	.	29088004	29088664	MSTRG.5230.1	1	661	MSTRG.5230	.	11.1747	0.14547	0.763699	1.55711	0.648415	0.389541	0.125482	0.418857	0.160092	0.824088	7.44994	2.89723	0.0242129	0.725936	up	yes
40154	o	chr18	+	38170947	38196637	MSTRG.16846.1	2	10252	MSTRG.16846	ENSSSCG00000038040	0.055471	1.86672	0.073589	0.05143	0.385494	0.086216	0.095169	0.080722	0.086939	0.062438	5.91202	2.56365	0.024257	0.726132	up	yes
63930	u	chr5	.	96099750	96102471	MSTRG.26156.1	1	2722	MSTRG.26156	.	0.193935	0.084825	0.102099	0.112822	0.382655	0.855497	1.14115	0.556697	0.130224	1.81735	0.194702	-2.36066	0.0243576	0.727652	down	yes
49034	u	chr3	-	6920737	6927171	MSTRG.20173.2	2	2108	MSTRG.20173	.	0.832123	0.735214	1.06979	0.225454	2.75851	0.391356	0.236029	0.107187	0.189651	0.198235	5.00784	2.32419	0.0243673	0.727652	up	yes
17712	i	chr13	-	15724104	15755263	MSTRG.7513.2	2	29837	MSTRG.7513	RBMS3	0.0001	0.642614	0.174465	0.15223	0.0001	0.0001	0.0001	0.0001	0.018943	0.0001	50.122	5.64737	0.0244157	0.728519	up	yes
21497	i	chr13	-	115445289	115471130	MSTRG.9087.1	2	8712	MSTRG.9087	TBL1XR1	0.0001	0.014163	0.119019	0.82545	0.023094	0.023931	0.013508	0.017967	0.012618	0.019842	11.1741	3.48209	0.0247052	0.733492	up	yes
57126	i	chr4	.	90601105	90602941	MSTRG.23502.1	1	1837	MSTRG.23502	CFAP45	0.094747	0.0001	0.018863	0.024783	0.0001	0.036484	0.740138	0.0001	0.021893	1.97044	0.0500507	-4.32047	0.025484	0.749702	down	yes
11368	u	chr11	+	7618145	7620306	MSTRG.4883.1	1	2162	MSTRG.4883	.	0.040467	0.055998	0.136276	0.018416	0.062556	0.040094	1.7689	0.022784	0.0001	1.86474	0.0848648	-3.55869	0.0255749	0.751571	down	yes
74356	x	chr7	-	31104702	31160996	MSTRG.30495.3	5	6977	MSTRG.30495	SCUBE3	0.068232	0.142152	0.062791	1.24232	0.176557	0.024645	0.025113	0.153408	0.019361	0.048793	6.23637	2.64071	0.0256116	0.751571	up	yes
69021	u	chr6	.	78451003	78453334	MSTRG.28317.1	1	2332	MSTRG.28317	.	0.008116	0.013679	0.136348	0.0001	0.0001	0.020382	1.7189	0.0001	0.020066	1.74125	0.0452318	-4.46652	0.0256123	0.751571	down	yes
47597	i	chr2	-	132677371	132737918	MSTRG.19551.1	3	44861	MSTRG.19551	CHSY3	7.42882	4.91182	3.66548	1.90309	4.39855	1.24653	1.07661	2.28458	2.40176	1.82755	2.52435	1.33591	0.0256924	0.753159	up	yes
24008	i	chr13	.	203257145	203258305	MSTRG.10088.1	1	1161	MSTRG.10088	B3GALT5	0.0001	0.033495	0.353361	0.059453	0.078778	0.761209	1.66416	0.042428	0.258424	2.14107	0.107901	-3.21222	0.0257314	0.75354	down	yes
82162	u	chr8	.	137383263	137385858	MSTRG.33724.1	1	2596	MSTRG.33724	.	0.159726	0.186779	0.046752	0.223711	0.157105	0.235253	1.33374	0.26269	0.390018	1.8116	0.19192	-2.38142	0.0259664	0.75727	down	yes
73126	u	chr7	.	14144581	14145034	MSTRG.30018.1	1	454	MSTRG.30018	.	0.096355	0.667927	0.0001	0.0001	0.0001	5.18419	0.87742	2.99338	0.427436	1.13297	0.0720258	-3.79534	0.0259681	0.75727	down	yes
30029	i	chr14	-	135544364	135569100	MSTRG.12564.1	3	23733	MSTRG.12564	ADAM12	0.036299	0.027322	0.004368	0.091478	0.028417	0.026528	1.49371	0.114241	0.059874	0.0001	0.110882	-3.1729	0.026456	0.76855	down	yes
32521	i	chr15	.	91854236	91855651	MSTRG.13646.1	1	1416	MSTRG.13646	ZSWIM2	0.122698	0.015126	0.026071	0.124458	0.0001	0.10215	1.08767	0.069575	0.030455	1.76139	0.0945362	-3.40299	0.0264888	0.768732	down	yes
20617	u	chr13	.	81954692	81957716	MSTRG.8685.1	1	3025	MSTRG.8685	.	0.014359	0.021242	0.159797	0.015212	0.04487	0.0001	0.965729	0.0001	0.035033	2.96732	0.0643804	-3.95723	0.0267098	0.772825	down	yes
56501	u	chr4	+	76860298	76882690	MSTRG.23295.1	4	2765	MSTRG.23295	.	0.208255	0.209285	0.598386	0.410344	0.144813	0.358396	2.89012	0.396742	0.267252	4.15426	0.19476	-2.36023	0.0269343	0.776685	down	yes
33243	u	chr15	+	115040960	115064807	MSTRG.13917.1	2	6646	MSTRG.13917	.	0.309456	0.457034	0.31788	0.139461	0.499183	1.79022	1.07583	1.72024	0.160365	2.13009	0.250557	-1.99679	0.0270072	0.777936	down	yes
67408	u	chr6	-	56114383	56124798	MSTRG.27695.1	2	6373	MSTRG.27695	.	0.0001	0.186011	0.092713	0.061374	0.106844	0.095679	1.25609	0.110305	0.12835	1.66265	0.137421	-2.86332	0.027065	0.779213	down	yes
933	i	chr1	.	25596623	25598241	MSTRG.416.1	1	1619	MSTRG.416	ECT2L	0.0001	0.119065	0.086151	0.0001	0.0001	0.029781	1.29726	0.075417	0.026636	2.03711	0.0592913	-4.07604	0.0281866	0.801163	down	yes
7097	u	chr1	-	251193493	251207975	MSTRG.3054.1	1	14483	MSTRG.3054	.	0.213146	0.915013	0.163839	0.418825	0.250509	0.545727	4.97906	0.573375	1.08876	0.282864	0.262568	-1.92923	0.0283132	0.803972	down	yes
82158	u	chr8	.	137284506	137285694	MSTRG.33720.1	1	1189	MSTRG.33720	.	0.348216	0.170301	0.121262	0.0328	0.268547	0.311606	1.92651	0.823733	0.126298	2.824	0.156538	-2.67542	0.0287121	0.812516	down	yes
49562	i	chr3	+	13670444	13691052	MSTRG.20404.2	2	20066	MSTRG.20404	ENSSSCG00000035984	3.44829	1.53482	0.0001	0.0001	0.0001	0.0001	0.046531	0.0001	0.0001	0.0001	106.186	6.73045	0.0289987	0.818627	up	yes
55647	i	chr4	+	40084160	40097848	MSTRG.22930.2	2	12399	MSTRG.22930	SDC2	0.0001	0.041149	0.0001	0.0001	0.0001	0.569337	0.0001	0.002919	2.17354	0.0001	0.0151307	-6.04637	0.0291445	0.821542	down	yes
167	i	chr1	-	3239352	3255428	MSTRG.70.1	1	16077	MSTRG.70	PDE10A	0.0001	0.0001	0.0001	0.0001	0.076005	0.867088	0.0001	1.5197	1.25616	0.0001	0.0209723	-5.57537	0.0295003	0.829155	down	yes
82157	u	chr8	.	137278259	137279522	MSTRG.33719.1	1	1264	MSTRG.33719	.	0.145921	0.06778	0.36865	0.109216	0.129193	0.149061	1.66235	0.821428	0.198168	1.97981	0.170607	-2.55125	0.0309416	0.858607	down	yes
22746	u	chr13	-	145084698	145094780	MSTRG.9637.1	1	10083	MSTRG.9637	.	0.23112	0.168763	0.291353	0.235102	0.158547	0.280308	0.0001	2.61036	4.00883	0.2328	0.152107	-2.71685	0.0319237	0.878115	down	yes
34130	j	chr15	+	139753031	139777919	MSTRG.14238.1	8	5071	MSTRG.14238	CROCC2	0.083121	0.05335	0.0001	0.026901	0.098783	0.0001	0.978743	0.0001	0.056241	3.24674	0.061247	-4.02922	0.0321389	0.881524	down	yes
53370	i	chr3	.	101139430	101142092	MSTRG.21992.1	1	2663	MSTRG.21992	SOS1	0.115164	0.280649	0.125481	0.153742	0.098225	0.36185	0.647544	0.353751	0.545529	1.74499	0.21164	-2.24032	0.0325337	0.888988	down	yes
53159	o	chr3	+	94798470	94873313	MSTRG.21903.1	2	16203	MSTRG.21903	ENSSSCG00000036599	0.001597	0.162101	0.0001	0.004997	0.009151	4.12164	0.0001	0.001761	0.640194	0.0001	0.0373538	-4.7426	0.0326512	0.890191	down	yes
31566	i	chr15	-	59528321	59538402	MSTRG.13275.2	1	10082	MSTRG.13275	WDR33	0.0001	0.017411	0.004981	0.0001	0.146162	0.074065	0.040053	0.004886	0.007016	2.59373	0.0620476	-4.01048	0.0326553	0.890191	down	yes
71816	i	chr6	.	155632183	155633219	MSTRG.29413.1	1	1037	MSTRG.29413	FYB2	0.042184	0.041309	0.350444	0.133124	0.132297	1.66835	0.210364	3.33589	0.0001	0.878015	0.114786	-3.12298	0.0327251	0.891279	down	yes
42689	i	chr2	+	16394335	16441204	MSTRG.17683.2	2	21114	MSTRG.17683	PHF21A	0.10737	0.016919	0.013726	0.114599	0.0001	0.025529	0.0001	0.009399	2.37116	0.881694	0.0768622	-3.70158	0.0327589	0.891779	down	yes
69723	o	chr6	+	88511523	88587392	MSTRG.28572.1	3	4925	MSTRG.28572	KHDRBS1	0.001071	0.002151	0.17942	0.219295	0.002392	0.0001	0.002587	0.0001	3.49227	5.32689	0.0458322	-4.4475	0.032808	0.892282	down	yes
26284	u	chr14	-	47185327	47196608	MSTRG.11002.1	2	10072	MSTRG.11002	.	3.76441	0.023407	0.047734	0.529019	0.079875	0.021525	0.375043	0.02931	0.031823	0.149651	7.31775	2.8714	0.0332294	0.89952	up	yes
18609	x	chr13	+	31919756	31972998	MSTRG.7860.2	2	7990	MSTRG.7860	RHOA	5.30898	2.20043	7.07148	5.37783	6.55826	4.02863	1.94054	1.41095	0.148738	0.186044	3.43711	1.7812	0.0336477	0.906795	up	yes
24007	i	chr13	+	203243063	203249896	MSTRG.10087.1	1	6834	MSTRG.10087	B3GALT5	0.186835	0.121697	0.069408	0.30513	0.154856	0.126517	1.26015	0.110266	0.149877	2.45393	0.204335	-2.29099	0.0342013	0.916364	down	yes
40183	u	chr18	+	39221423	39334148	MSTRG.16878.1	2	8317	MSTRG.16878	.	1.29706	0.82211	0.123485	0.959649	2.0059	0.0001	0.03128	0.02241	0.015389	0.649727	7.24462	2.85691	0.0347114	0.925808	up	yes
82156	u	chr8	.	137267410	137270702	MSTRG.33718.1	1	3293	MSTRG.33718	.	0.194648	0.212518	0.128655	0.080574	0.207914	0.234992	0.96917	0.453218	0.192393	1.91155	0.219154	-2.18998	0.0349216	0.930704	down	yes
76300	i	chr7	-	72837136	72848036	MSTRG.31310.1	2	9172	MSTRG.31310	NOVA1	0.190852	0.176051	0.282429	1.29502	0.237547	3.47356	0.129013	2.47554	1.90747	0.716855	0.250722	-1.99584	0.0354756	0.94229	down	yes
75121	j	chr7	+	46509812	46517732	MSTRG.30785.2	5	1167	MSTRG.30785	TMEM14A	0.0001	5.47764	0.202465	0.152409	0.732054	0.0001	0.0001	0.169701	0.139367	0.153793	14.1767	3.82545	0.0365148	0.962834	up	yes
24078	i	chr13	+	205815233	205816107	MSTRG.10116.1	1	875	MSTRG.10116	RSPH1	0.149984	0.122391	0.147265	0.0001	0.0001	0.0001	1.68361	0.0001	0.098568	7.49077	0.0452748	-4.46515	0.0367907	0.968349	down	yes
40172	i	chr18	-	38985628	39041991	MSTRG.16869.1	2	8042	MSTRG.16869	NPSR1	1.99239	0.668623	0.281985	1.441	4.74169	0.18703	0.453597	0.26597	0.268512	1.25104	3.76139	1.91127	0.0369256	0.970578	up	yes
17658	i	chr13	.	13786534	13793660	MSTRG.7472.1	1	7127	MSTRG.7472	NEK10	0.182202	0.185836	0.146375	0.102161	0.386083	0.286627	1.24882	0.321305	0.256877	1.87029	0.251676	-1.99036	0.0376349	0.986538	down	yes
8625	u	chr10	+	13574499	13592367	MSTRG.3709.7	3	14783	MSTRG.3709	.	0.018035	0.115836	4e-06	0.096413	2.1e-05	0.0001	0.002355	0.014655	0.0001	2e-06	13.3807	3.74208	0.0379195	0.992205	up	yes
27308	i	chr14	-	62552008	62552302	MSTRG.11417.1	1	295	MSTRG.11417	PHYHIPL	34.1282	0.889799	1.08197	5.0685	2.74581	1.76595	0.758009	1.20913	0.278989	3.6529	5.72921	2.51834	0.0381271	0.996737	up	yes
57123	u	chr4	.	90594135	90595304	MSTRG.23500.1	1	1170	MSTRG.23500	.	0.037389	0.084132	0.04197	0.0001	0.078172	0.041209	0.924912	0.040907	0.0001	1.75528	0.087519	-3.51426	0.0382106	0.99802	down	yes
67407	u	chr6	.	56107483	56108869	MSTRG.27694.1	1	1387	MSTRG.27694	.	0.093388	0.118501	0.206773	0.033177	0.0001	0.0001	2.82473	0.07103	0.062183	2.13591	0.0887207	-3.49459	0.0385033	1	down	yes
65722	u	chr6	+	38338744	38367297	MSTRG.27044.1	2	28484	MSTRG.27044	.	0.011415	0.238706	0.003448	0.104812	0.32789	1.35822	0.006184	2.40047	0.238284	0.109461	0.16687	-2.58321	0.0385282	1	down	yes
25397	i	chr14	+	30610170	30627160	MSTRG.10693.2	2	16017	MSTRG.10693	MLXIP	0.0001	0.062021	0.642743	0.158545	0.305701	0.0001	0.0001	0.0001	0.053819	0.0001	21.5627	4.43047	0.0388071	1	up	yes
387	o	chr1	-	9196893	9247416	MSTRG.197.1	2	2499	MSTRG.197	SNX9	0.134593	0.764622	3.20528	2.74681	2.57982	0.200995	1.0885	0.127262	0.15624	0.306599	5.01764	2.32701	0.0388339	1	up	yes
63645	o	chr5	-	86211092	86233796	MSTRG.26003.1	2	5949	MSTRG.26003	RF01963	0.101305	1.00628	0.35073	0.503641	0.226077	1.00112	3.08891	0.099128	0.799307	4.05396	0.241974	-2.04708	0.0388537	1	down	yes
21190	j	chr13	-	104945303	105006325	MSTRG.8931.1	3	8447	MSTRG.8931	ENSSSCG00000033350	0.394139	0.796063	0.989826	0.803994	0.679511	0.776638	3.78256	1.29266	0.854631	4.22057	0.335271	-1.5766	0.0389039	1	down	yes
46451	u	chr2	-	85236268	85244157	MSTRG.19008.1	1	7890	MSTRG.19008	.	1.16647	1.59093	0.225553	1.18819	1.15234	0.989908	8.88231	3.33606	1.72838	1.50027	0.323873	-1.6265	0.0389598	1	down	yes
63929	u	chr5	.	96093715	96096102	MSTRG.26155.1	1	2388	MSTRG.26155	.	0.411068	0.034032	0.132567	0.066146	0.366705	1.41261	0.852635	0.676767	0.089076	2.08234	0.197621	-2.33919	0.038965	1	down	yes
31430	x	chr15	+	54653273	54738173	MSTRG.13206.3	2	8107	MSTRG.13206	RBPMS	0.321295	4.25876	2.28703	0.46169	2.93597	0.241942	1.55925	0.153134	0.386014	0.158867	4.10719	2.03815	0.0390046	1	up	yes
28236	i	chr14	.	88911859	88913406	MSTRG.11820.1	1	1548	MSTRG.11820	FRMPD2	0.0001	0.0001	0.063443	0.0001	0.0001	0.0001	1.63205	0.0001	0.0001	2.02436	0.0174591	-5.83987	0.0391193	1	down	yes
90640	x	chrY	-	25247147	25262700	MSTRG.37089.1	2	711	MSTRG.37089	ENSSSCG00000034853	16.1159	0.166304	0.409685	2.45181	0.794038	0.956066	0.691931	0.387682	0.153394	1.13405	5.9997	2.58489	0.0392955	1	up	yes
63922	u	chr5	.	96061924	96067350	MSTRG.26148.1	1	5427	MSTRG.26148	.	0.651399	0.136649	0.290346	0.192705	0.520051	1.29013	1.36835	0.980475	0.37358	2.57249	0.272003	-1.8783	0.0397524	1	down	yes
26283	u	chr14	-	47171151	47185218	MSTRG.11001.1	1	14068	MSTRG.11001	.	2.83908	0.038926	0.024941	0.448776	0.037337	0.0688	0.272293	0.014006	0.038882	0.146629	6.26896	2.64823	0.0397926	1	up	yes
69560	o	chr6	+	85533505	85535677	MSTRG.28519.1	2	953	MSTRG.28519	RF00045	5.85214	4.09053	2.53988	4.98998	4.23112	4.73275	47.281	21.3868	2.04841	3.3098	0.275571	-1.8595	0.0401769	1	down	yes
55976	i	chr4	-	55832952	55838712	MSTRG.23045.1	2	4147	MSTRG.23045	ZNF704	0.194177	0.230952	0.678174	0.298499	0.289214	0.468606	0.9681	2.06241	1.96711	0.828741	0.26863	-1.89631	0.0402276	1	down	yes
83211	u	chr9	+	17222950	17234382	MSTRG.34121.2	2	10700	MSTRG.34121	.	0.331109	0.211974	0.0001	0.451531	0.196709	1.16877	0.668202	0.321415	1.92284	1.57598	0.210603	-2.2474	0.0410459	1	down	yes
30820	u	chr15	.	30898972	30902124	MSTRG.12923.1	1	3153	MSTRG.12923	.	0.0001	0.040421	0.036284	0.0001	0.043511	0.0001	1.7645	0.0001	0.041322	0.440645	0.0535977	-4.22168	0.041211	1	down	yes
80921	u	chr8	.	88275621	88281271	MSTRG.33198.1	1	5651	MSTRG.33198	.	0.296058	0.231203	0.043849	0.250615	0.373	0.6632	0.760902	0.410034	0.518755	2.34654	0.254227	-1.97581	0.0412657	1	down	yes
23274	u	chr13	.	164376397	164376999	MSTRG.9811.1	1	603	MSTRG.9811	.	0.0001	0.091445	0.0001	0.0001	0.212455	0.0001	0.264728	2.50328	1.70104	0.155249	0.0657815	-3.92618	0.0415285	1	down	yes
16412	i	chr12	-	50534341	50536509	MSTRG.6911.1	1	2169	MSTRG.6911	TEKT1	0.060505	0.097418	0.065429	0.0001	0.0001	0.011114	0.988831	0.0001	0.113933	2.07608	0.0700776	-3.8349	0.0417169	1	down	yes
34503	i	chr16	.	21138398	21140975	MSTRG.14409.1	1	2578	MSTRG.14409	SPEF2	0.212108	0.264094	0.603176	0.298317	0.250796	0.722626	1.80007	0.618284	0.700955	2.38001	0.261733	-1.93383	0.0419281	1	down	yes
38122	i	chr17	.	48974154	48976528	MSTRG.16032.1	1	2375	MSTRG.16032	EYA2	0.018419	0.133292	0.020676	0.047476	0.037417	0.0001	0.45551	0.0001	0.035928	2.73611	0.0797088	-3.64912	0.0419462	1	down	yes
16166	i	chr12	+	47625476	47636593	MSTRG.6815.7	2	11098	MSTRG.6815	ENSSSCG00000038989	4.12005	2.72116	3.21879	0.555187	5.2e-05	0.0001	0.0001	0.571555	0.0001	0.0001	18.5596	4.21409	0.0421469	1	up	yes
19154	i	chr13	.	39203513	39204229	MSTRG.8037.1	1	717	MSTRG.8037	ENSSSCG00000020990	0.061011	0.0001	0.034243	0.0001	0.0001	0.0001	1.74339	0.0001	0.0001	1.20806	0.0323719	-4.94911	0.0422299	1	down	yes
42778	u	chr2	+	20380657	21134826	MSTRG.17723.1	4	5375	MSTRG.17723	.	0.261186	0.00797	0.0461	0.09813	0.03361	0.043841	3.03332	0.070944	0.079092	0.015926	0.137829	-2.85905	0.0426436	1	down	yes
42784	u	chr2	+	21136043	21144965	MSTRG.17729.1	2	7961	MSTRG.17729	.	0.21251	0.0001	0.079771	0.049021	0.047478	0.175713	2.56133	0.083542	0.086582	0.010734	0.133274	-2.90753	0.0435388	1	down	yes
63633	o	chr5	-	86116915	86144233	MSTRG.25999.3	2	854	MSTRG.25999	RF01970	0.0001	0.224074	0.345407	0.080634	0.0001	0.595724	1.71871	0.115157	0.724028	1.99728	0.126253	-2.98562	0.0436932	1	down	yes
32972	i	chr15	-	106036547	106062086	MSTRG.13806.1	3	3377	MSTRG.13806	BMPR2	0.133044	0.154368	0.33859	0.16574	0.303298	0.394528	0.153647	1.97705	0.211481	2.11021	0.225925	-2.14609	0.0439688	1	down	yes
21086	x	chr13	+	98462490	98483333	MSTRG.8894.1	3	7441	MSTRG.8894	RARRES1	3.25717	4.11743	7.39193	0.592704	3.08907	3.08565	1.9304	23.0128	19.3459	9.93992	0.321878	-1.63542	0.0442586	1	down	yes
56456	u	chr4	.	75249491	75250856	MSTRG.23273.1	1	1366	MSTRG.23273	.	0.064049	0.0001	0.033526	0.097836	0.084288	1.83077	0.0001	1.66941	0.0001	0.203108	0.07555	-3.72642	0.044645	1	down	yes
9023	i	chr10	.	22616564	22624271	MSTRG.3896.1	1	7708	MSTRG.3896	ENSSSCG00000040123	4.04949	0.208326	0.035197	0.621616	0.213815	0.419737	0.214155	0.187278	0.157484	0.154532	4.52569	2.17814	0.0449278	1	up	yes
63647	o	chr5	-	86233901	86239594	MSTRG.26005.1	2	5426	MSTRG.26005	RF01962	0.123124	0.814511	0.40604	0.34695	0.235224	0.712751	2.69141	0.130091	0.51254	3.60696	0.251622	-1.99067	0.0450837	1	down	yes
82166	u	chr8	.	137429905	137435678	MSTRG.33728.1	1	5774	MSTRG.33728	.	0.287602	0.17624	0.137308	0.055787	0.153093	0.187793	0.900685	0.428284	0.111075	1.8171	0.235136	-2.08843	0.0452671	1	down	yes
80924	u	chr8	.	88352074	88353482	MSTRG.33201.1	1	1409	MSTRG.33201	.	0.676649	0.461535	0.069702	0.330179	0.328473	0.420214	1.67802	0.547093	1.46268	4.21751	0.224195	-2.15717	0.0452974	1	down	yes
17730	i	chr13	+	16207402	16251839	MSTRG.7525.1	2	8818	MSTRG.7525	RBMS3	0.905571	1.3	0.424749	2.44496	0.387771	0.323202	0.348056	0.415458	0.224594	0.39552	3.2007	1.67839	0.045371	1	up	yes
63932	u	chr5	.	96107387	96112895	MSTRG.26158.1	1	5509	MSTRG.26158	.	0.424658	0.085176	0.092771	0.132522	0.368867	0.973423	0.697605	0.577049	0.209686	1.93787	0.251157	-1.99334	0.0457659	1	down	yes
9020	j	chr10	-	22602010	22669861	MSTRG.3891.3	5	2750	MSTRG.3891	ENSSSCG00000040123	2.125	0.069679	0.044071	0.328245	0.050212	0.110001	0.121987	0.07087	0.070009	0.076597	5.82295	2.54175	0.0469032	1	up	yes
23424	u	chr13	+	178174841	178184688	MSTRG.9857.1	3	7532	MSTRG.9857	.	0.090393	0.153578	0.109745	0.042745	0.508522	1.62509	0.011734	0.796041	0.17233	1.82469	0.20429	-2.29131	0.0472301	1	down	yes
18275	u	chr13	-	29582453	29589780	MSTRG.7747.1	2	2420	MSTRG.7747	.	0.17334	0.202874	0.299332	0.3795	0.264423	0.168925	3.4692	0.368364	0.446702	1.08625	0.238195	-2.06978	0.0473808	1	down	yes
64921	u	chr6	.	17446705	17448231	MSTRG.26681.1	1	1527	MSTRG.26681	.	0.0001	0.098186	0.058386	0.0001	0.029948	0.0001	2.05894	0.005148	0.0001	1.58932	0.0511056	-4.29037	0.0480872	1	down	yes
27937	u	chr14	+	77946308	78040170	MSTRG.11679.1	2	51559	MSTRG.11679	.	0.138252	0.117628	0.184324	0.801428	0.151518	0.113516	0.176785	0.138759	1.99718	2.62815	0.275632	-1.85918	0.0483782	1	down	yes
56503	u	chr4	.	76886196	76887424	MSTRG.23297.1	1	1229	MSTRG.23297	.	0.124453	0.10506	0.430864	0.187211	0.279731	0.370049	1.69863	0.354046	0.280707	2.62291	0.211649	-2.24025	0.0485479	1	down	yes
71953	u	chr6	.	158557724	158563334	MSTRG.29524.1	1	5611	MSTRG.29524	.	0.198668	0.124723	2.66345	0.294629	0.826807	0.054391	0.054435	0.329805	0.258447	0.234439	4.4103	2.14088	0.0489194	1	up	yes
41315	i	chr2	+	5293643	5322340	MSTRG.17329.1	2	6163	MSTRG.17329	KDM2A	0.532523	3.60311	0.46794	0.093694	3.30835	0.487667	0.226632	0.554032	0.403264	0.490535	3.70266	1.88856	0.0494938	1	up	yes
60845	u	chr5	+	20208492	20213198	MSTRG.24924.1	2	616	MSTRG.24924	.	0.0001	1.96415	1.60251	2.19232	1.45808	0.0001	0.071486	0.079966	0.0001	0.548111	10.3137	3.36649	0.0496822	1	up	yes
90647	u	chrY	.	25301524	25301981	MSTRG.37094.1	1	458	MSTRG.37094	.	19.2737	0.0001	0.0001	1.84419	0.817198	0.604785	0.181384	0.0001	0.0001	0.489404	17.1938	4.10381	0.0499049	1	up	yes
82234	i	chr9	+	269108	285533	MSTRG.33773.1	2	16030	MSTRG.33773	DENND5A	2.00291	0.673426	1.19733	0.411118	0.379161	2.82866	0.961745	3.32473	3.00499	2.26311	0.376634	-1.40877	0.0510756	1	down	no
63632	o	chr5	-	86076730	86209368	MSTRG.25999.2	11	33810	MSTRG.25999	RF01968	0.014144	2.02431	0.845863	1.01115	0.0328	1.5277	4.4569	0.339768	1.63207	7.88585	0.247961	-2.01182	0.0511079	1	down	no
34302	i	chr16	+	5756878	5765848	MSTRG.14322.1	1	8971	MSTRG.14322	RETREG1	0.740056	1.42464	1.45177	0.997389	1.08521	4.35896	0.808586	4.65138	1.73372	3.15682	0.387442	-1.36795	0.0516785	1	down	no
52025	u	chr3	.	58110540	58111294	MSTRG.21425.1	1	755	MSTRG.21425	.	0.0001	0.0001	0.03252	0.0001	0.660258	0.8209	1.65379	1.16583	0.883293	1.5274	0.114535	-3.12613	0.0517449	1	down	no
24010	i	chr13	-	203263812	203273545	MSTRG.10090.1	2	1502	MSTRG.10090	B3GALT5	0.043687	0.073019	0.093442	0.519391	0.243139	0.713411	2.32692	0.0001	0.271938	3.10443	0.151583	-2.72182	0.0518063	1	down	no
27972	i	chr14	+	79825909	79872644	MSTRG.11702.1	1	46736	MSTRG.11702	KCNMA1	3.26792	2.44867	7.20117	3.95452	5.79715	1.50514	0.532142	1.76399	1.74369	3.98232	2.37942	1.25061	0.0518437	1	up	no
2051	x	chr1	+	75481952	75508062	MSTRG.904.1	2	1121	MSTRG.904	PPIL6	0.0001	0.248297	0.04194	0.0001	0.219427	0.074193	1.28208	0.131826	0.152784	2.85422	0.113427	-3.14017	0.0518626	1	down	no
23422	u	chr13	.	178168546	178171639	MSTRG.9855.1	1	3094	MSTRG.9855	.	0.153571	0.13423	0.031629	0.074206	0.541948	1.50483	0.028818	1.01532	0.194091	1.97696	0.198216	-2.33485	0.0519782	1	down	no
80920	u	chr8	.	88257685	88264519	MSTRG.33197.1	1	6835	MSTRG.33197	.	0.433851	0.45029	0.096199	0.203884	0.284328	0.564076	0.783123	0.689	0.651305	2.31201	0.293739	-1.76739	0.0523614	1	down	no
68354	i	chr6	.	65212953	65213608	MSTRG.28044.1	1	656	MSTRG.28044	TP73	0.0001	0.0001	0.28721	0.0001	0.036092	0.0001	1.69365	0.15018	0.065737	2.84348	0.0680816	-3.87659	0.0524754	1	down	no
10555	u	chr10	+	57451726	57470239	MSTRG.4576.1	2	10676	MSTRG.4576	.	0.455949	0.0001	0.0001	0.0001	0.0001	2.47306	2.53742	0.0001	1.22014	2.83738	0.0503247	-4.31259	0.0525607	1	down	no
64045	o	chr5	-	101706396	101750120	MSTRG.26202.6	2	4333	MSTRG.26202	RF00001	1.59607	3.03969	4.27947	3.4202	3.21564	0.0001	0.0001	0.0001	1.36449	0.0001	11.3937	3.51016	0.052739	1	up	no
34498	u	chr16	-	20727644	20729141	MSTRG.14405.1	2	1280	MSTRG.14405	.	0.034176	0.100281	0.249361	0.0001	0.0001	2.12675	0.396252	1.12231	0.0001	0.363941	0.0957806	-3.38412	0.0530698	1	down	no
63069	x	chr5	-	70194341	70217476	MSTRG.25758.1	2	6577	MSTRG.25758	USP18	0.545554	0.725375	0.658783	5.17063	0.973823	0.314392	0.482911	0.586128	0.374939	0.683612	3.3064	1.72526	0.0531126	1	up	no
83206	i	chr9	+	17205910	17216578	MSTRG.34119.2	2	10322	MSTRG.34119	RAB30	1.01574	1.24154	1.60983	1.57673	0.345972	2.2011	2.77891	3.59796	3.17704	2.36214	0.410126	-1.28586	0.0532037	1	down	no
74561	x	chr7	-	33484272	33594372	MSTRG.30576.3	3	21166	MSTRG.30576	ZFAND3	0.122881	0.126411	0.153036	0.111996	0.185465	0.16363	0.127917	0.564452	1.47636	0.10941	0.286591	-1.80294	0.0538652	1	down	no
1580	j	chr1	-	51343576	51428658	MSTRG.696.1	4	12126	MSTRG.696	ENSSSCG00000035593	0.141212	0.077944	0.081596	0.029367	0.093953	0.184376	0.279295	0.075768	0.108007	1.03261	0.252415	-1.98613	0.0540006	1	down	no
34112	i	chr15	.	139498941	139499862	MSTRG.14230.1	1	922	MSTRG.14230	ANKMY1	0.047446	0.645676	0.163743	0.0001	0.173597	0.624184	1.51141	0.412444	0.591945	3.11749	0.164693	-2.60215	0.0541795	1	down	no
27965	i	chr14	+	79669904	79684636	MSTRG.11696.1	1	14733	MSTRG.11696	KCNMA1	1.57739	1.13094	4.36449	1.91514	2.4674	0.833167	0.344327	0.731719	1.08197	1.69164	2.44625	1.29057	0.0543259	1	up	no
42780	u	chr2	+	20688490	20694309	MSTRG.17725.1	1	5820	MSTRG.17725	.	0.298735	0.00736	0.135086	0.086244	0.059544	0.07779	3.30478	0.080616	0.033185	0.058285	0.165127	-2.59835	0.0543311	1	down	no
7100	u	chr1	+	251232649	251236660	MSTRG.3035.1	1	4012	MSTRG.3035	.	0.031783	0.398843	0.165233	0.164318	0.185689	0.153544	3.63058	0.110502	0.265781	0.239618	0.214968	-2.2178	0.0564273	1	down	no
71951	u	chr6	.	158538140	158553427	MSTRG.29522.1	1	15288	MSTRG.29522	.	0.11954	0.133741	2.30895	0.342026	0.72761	0.079381	0.057955	0.416585	0.271772	0.175692	3.62685	1.85872	0.0564399	1	up	no
71954	u	chr6	-	158571232	158572606	MSTRG.29525.1	1	1375	MSTRG.29525	.	0.198673	0.184716	2.85714	0.334546	0.767188	0.0001	0.032026	0.307941	0.092976	0.262599	6.24209	2.64203	0.0567816	1	up	no
87356	o	chrX	+	8056956	8085933	MSTRG.35763.2	2	26159	MSTRG.35763	ENSSSCG00000012113	2.06508	2.58464	1.56877	3.15403	1.89949	1.62718	0.335356	0.683593	1.21292	1.12178	2.26309	1.17829	0.0568633	1	up	no
86284	i	chr9	-	111761758	111773492	MSTRG.35298.1	2	11707	MSTRG.35298	ENSSSCG00000035172	0.879324	0.351117	3.07206	0.388956	4.28066	0.86886	0.413988	0.522878	0.552528	0.694102	2.93941	1.55553	0.0569648	1	up	no
34722	j	chr16	-	27537859	27549750	MSTRG.14509.1	6	2759	MSTRG.14509	SELENOP	22.1419	51.0068	22.8183	45.4879	0.043055	41.9586	102.717	280.031	98.8842	18.6621	0.260944	-1.93819	0.0574736	1	down	no
77534	x	chr7	-	96904333	96946178	MSTRG.31788.1	2	662	MSTRG.31788	ACOT4	1.23201	2.71691	0.0001	0.131586	0.227678	4.0069	7.71532	3.05939	1.70414	6.91627	0.184099	-2.44145	0.0575892	1	down	no
27968	i	chr14	+	79750238	79760941	MSTRG.11699.1	1	10704	MSTRG.11699	KCNMA1	1.35208	1.11817	3.11244	1.6215	2.58473	0.516755	0.253867	0.674184	0.701614	1.63295	2.59009	1.373	0.0576322	1	up	no
27307	i	chr14	-	62550558	62557645	MSTRG.11416.1	2	1903	MSTRG.11416	PHYHIPL	0.178108	0.541874	0.299033	0.511659	0.456217	0.079123	2.93952	0.0001	0.182412	9.64335	0.154688	-2.69257	0.0580004	1	down	no
6337	o	chr1	-	227937470	228023595	MSTRG.2730.1	2	3928	MSTRG.2730	TRPM6	0.0001	0.074831	0.565749	0.079234	0.558523	0.030034	0.016816	0.03104	0.073385	0.048947	6.3851	2.67471	0.0582132	1	up	no
63113	u	chr5	-	72687343	72703677	MSTRG.25802.1	1	16335	MSTRG.25802	.	0.786274	1.33849	0.53835	0.498507	1.0261	1.97098	3.19682	1.82722	1.57356	1.21582	0.428	-1.22432	0.0594317	1	down	no
77352	j	chr7	+	93393408	93404307	MSTRG.31707.10	7	8737	MSTRG.31707	SRSF5	0.0001	0.023281	0.00534	0.608939	0.016237	0.294756	0.478093	2.98673	0.3988	0.19734	0.150124	-2.73578	0.0600572	1	down	no
58539	u	chr4	-	108380353	108385209	MSTRG.24019.1	1	4857	MSTRG.24019	.	0.421907	0.259059	0.566884	0.724141	0.509405	1.73451	0.227656	2.97247	2.3611	0.873342	0.303755	-1.71902	0.0600994	1	down	no
10851	i	chr10	-	65570875	65593147	MSTRG.4686.1	2	279	MSTRG.4686	ENSSSCG00000011147	20.6351	2.64875	0.352006	2.12959	11.8383	1.4689	0.904017	2.05166	2.47085	0.0001	5.45335	2.44714	0.0602934	1	up	no
56499	u	chr4	.	76830921	76844647	MSTRG.23294.1	1	13727	MSTRG.23294	.	0.122816	0.260905	0.606128	0.459829	0.314442	0.312565	2.0082	0.412918	0.183077	2.54884	0.322768	-1.63143	0.0603914	1	down	no
19949	o	chr13	+	66133835	66158322	MSTRG.8410.1	4	1481	MSTRG.8410	JAGN1	0.451492	0.145826	0.348591	0.597439	2.02698	0.842875	3.14783	3.4137	3.01124	2.57107	0.274922	-1.86291	0.0606733	1	down	no
39578	o	chr18	+	17751857	17968819	MSTRG.16591.1	7	10547	MSTRG.16591	ENSSSCG00000038347	0.126749	0.124666	0.306088	0.083475	0.452444	0.534894	0.36219	2.19184	0.120859	0.630779	0.284704	-1.81247	0.0607475	1	down	no
38124	i	chr17	.	49004603	49008364	MSTRG.16034.1	1	3762	MSTRG.16034	EYA2	0.0001	0.09069	0.011433	0.048928	0.0001	0.0001	0.311561	0.0001	0.006666	2.36071	0.0564551	-4.14675	0.061179	1	down	no
39874	i	chr18	+	25751386	25783682	MSTRG.16701.3	2	8637	MSTRG.16701	CPED1	2.86227	0.0001	2.64701	5.64113	6.5509	0.928041	0.0001	0.574561	0.0001	0.0001	11.7782	3.55804	0.0612041	1	up	no
56457	u	chr4	.	75252037	75252997	MSTRG.23274.1	1	961	MSTRG.23274	.	0.091041	0.089151	0.0001	0.190177	0.0001	1.39323	0.0001	2.26136	0.089747	0.133613	0.0955555	-3.38752	0.0612748	1	down	no
63111	u	chr5	+	72638124	72657612	MSTRG.25800.1	2	19421	MSTRG.25800	.	0.838052	1.49561	0.395004	0.639376	1.01712	1.80114	3.60078	1.7677	1.67004	1.353	0.430226	-1.21683	0.0626804	1	down	no
63549	x	chr5	-	83316899	83354490	MSTRG.25971.1	2	27379	MSTRG.25971	ENSSSCG00000032624	1.08614	1.49862	3.72639	1.99363	2.74955	0.589328	0.541879	2.02467	1.15702	0.39907	2.34601	1.23021	0.0630098	1	up	no
64914	i	chr6	-	17387695	17411208	MSTRG.26679.1	2	7244	MSTRG.26679	NFAT5	0.501886	0.094128	0.201359	0.270452	0.026979	1.82143	0.031013	0.124296	0.23185	2.90682	0.214021	-2.22418	0.0630708	1	down	no
81903	i	chr8	-	131893357	131897510	MSTRG.33608.1	1	4154	MSTRG.33608	AFF1	1.32103	0.0001	0.01246	0.0001	0.042703	3.70433	2.91411	4.54898	3.78003	0.0001	0.0920816	-3.44094	0.0630859	1	down	no
40069	i	chr18	+	33526624	33605230	MSTRG.16794.1	2	9821	MSTRG.16794	DOCK4	0.131274	0.101557	0.249131	0.177173	0.139258	0.17919	0.061511	0.166643	0.167457	2.67929	0.24535	-2.02708	0.063126	1	down	no
55241	u	chr4	+	23815765	23830846	MSTRG.22747.1	1	15082	MSTRG.22747	.	0.211181	0.183389	0.033598	0.260088	0.163606	0.159728	2.46849	0.219778	0.111441	0.153456	0.273656	-1.86956	0.0633438	1	down	no
31433	i	chr15	+	54658224	54695921	MSTRG.13206.5	2	6817	MSTRG.13206	RBPMS	0.0001	0.021066	0.228691	0.0001	3.25473	0.0001	0.003881	0.0001	0.051448	0.144223	17.5452	4.13301	0.0634404	1	up	no
63919	u	chr5	.	96028943	96034940	MSTRG.26145.1	1	5998	MSTRG.26145	.	0.431779	0.122526	0.08872	0.084364	0.406413	1.82507	0.273621	1.12871	0.324707	0.60609	0.272667	-1.87479	0.0641431	1	down	no
49589	i	chr3	+	14171130	14210018	MSTRG.20423.2	3	34736	MSTRG.20423	ENSSSCG00000035984	4.01596	1.47819	1.71683	0.20647	0.464301	0.580566	0.321605	0.781737	1.09678	0.188556	2.65446	1.40842	0.0650245	1	up	no
46052	o	chr2	-	78826883	78837283	MSTRG.18894.1	2	4285	MSTRG.18894	MAML1	0.114977	0.070035	0.060646	0.080568	2.55689	0.066848	0.051615	0.1127	0.256895	0.094271	4.95101	2.30772	0.0650749	1	up	no
71567	i	chr6	.	148236444	148238538	MSTRG.29328.1	1	2095	MSTRG.29328	UBE2U	0.041762	0.101366	0.158671	0.127973	0.105349	0.044722	0.792621	0.067787	0.053139	1.80363	0.193751	-2.36772	0.0655413	1	down	no
70323	o	chr6	+	98227654	98253653	MSTRG.28813.1	3	3671	MSTRG.28813	ENSSSCG00000037181	1.92976	0.0001	0.069038	0.2899	0.264837	0.0001	0.0001	0.0001	0.184966	0.012696	12.8996	3.68926	0.0661184	1	up	no
79758	x	chr8	-	48008786	48034488	MSTRG.32735.1	2	6049	MSTRG.32735	RAPGEF2	6.60044	3.71231	0.461645	0.414069	0.0001	0.0001	0.597929	0.0001	0.0001	0.0001	18.6997	4.22494	0.0665375	1	up	no
85463	x	chr9	-	77987180	78229643	MSTRG.34950.1	2	13288	MSTRG.34950	GLCCI1	0.18062	0.247026	0.0001	0.197023	0.225716	0.266874	0.129897	3.04756	0.320103	0.298104	0.209348	-2.25602	0.0671721	1	down	no
71955	u	chr6	-	158572765	158584188	MSTRG.29526.1	2	5057	MSTRG.29526	.	0.07997	0.080143	1.63477	0.295065	0.545014	0.070791	0.029696	0.225802	0.145135	0.172034	4.095	2.03386	0.0672501	1	up	no
71966	i	chr6	.	158733310	158736384	MSTRG.29537.1	1	3075	MSTRG.29537	GLIS1	0.127833	0.025638	2.3205	0.355862	0.461551	0.077174	0.042961	0.293913	0.168188	0.122259	4.67197	2.22403	0.067449	1	up	no
34502	o	chr16	+	21135406	21147540	MSTRG.14408.1	2	4906	MSTRG.14408	SPEF2	0.229061	0.280122	0.410185	0.347046	0.236706	0.365401	1.45368	0.492238	0.435273	2.07737	0.311594	-1.68226	0.0679033	1	down	no
79573	i	chr8	+	41417794	41436030	MSTRG.32651.4	2	12857	MSTRG.32651	KIT	0.556956	0.0001	0.0001	0.288374	0.0001	2.15531	2.15432	0.473362	1.81377	0.193573	0.124534	-3.00538	0.0682319	1	down	no
61509	i	chr5	-	32910593	32945203	MSTRG.25145.4	2	34565	MSTRG.25145	RAP1B	3.01393	0.0001	3.26106	1.38666	3.6572	0.0001	0.559237	0.289461	0.0001	0.0001	13.3321	3.73684	0.0686229	1	up	no
82600	i	chr9	.	4994371	4995156	MSTRG.33863.1	1	786	MSTRG.33863	ENSSSCG00000040340	0.0001	0.053727	0.0001	0.0001	0.230868	1.15614	0.0001	0.125341	2.29517	0.027227	0.0790502	-3.66109	0.0694841	1	down	no
63913	u	chr5	.	95973070	95988085	MSTRG.26139.1	1	15016	MSTRG.26139	.	0.59817	0.16981	0.232414	0.183478	0.63857	2.06822	0.419669	1.23966	0.470493	0.919123	0.356143	-1.48947	0.0695523	1	down	no
40184	u	chr18	+	39229948	39237234	MSTRG.16879.1	2	4915	MSTRG.16879	.	1.26049	0.894151	0.104904	1.0363	2.25853	0.0001	0.031358	0.079333	0.103575	0.866085	5.14079	2.36199	0.0697853	1	up	no
16157	i	chr12	+	47616584	47645009	MSTRG.6815.1	4	14816	MSTRG.6815	ENSSSCG00000038989	0.240289	0.982291	0.268034	0.110994	0.094922	5.36986	0.262811	0.309185	0.497231	0.122584	0.258551	-1.95148	0.0703761	1	down	no
81940	u	chr8	.	132364836	132377581	MSTRG.33635.1	1	12746	MSTRG.33635	.	0.506742	0.728797	0.795734	0.701927	0.606649	0.940959	1.39114	0.784885	1.67097	3.19759	0.418237	-1.25761	0.0704701	1	down	no
27975	i	chr14	+	79912112	79922751	MSTRG.11705.1	1	10640	MSTRG.11705	KCNMA1	1.6119	1.23545	3.72491	1.76673	2.47067	0.65444	0.277555	0.66414	0.70983	2.06744	2.47168	1.30549	0.0705582	1	up	no
50654	x	chr3	-	37600017	37601079	MSTRG.20907.1	3	880	MSTRG.20907	ROGDI	0.373933	0.115546	0.139502	0.104312	0.008442	0.085562	2.21366	0.049053	0.028939	2.2518	0.160236	-2.64173	0.0705771	1	down	no
10021	u	chr10	-	44472650	44480878	MSTRG.4344.2	2	5354	MSTRG.4344	.	0.141387	0.222522	0.52949	2.65846	0.170677	0.209887	0.188979	0.098547	0.115755	0.349932	3.86516	1.95053	0.071023	1	up	no
9051	i	chr10	-	22850746	22855084	MSTRG.3912.1	2	3178	MSTRG.3912	NR5A2	25.5316	7.43985	0.194526	2.6906	1.39025	1.21493	4.07837	1.14054	3.86011	0.570222	3.42841	1.77754	0.0714117	1	up	no
30025	i	chr14	-	135521466	135529855	MSTRG.12563.3	3	8049	MSTRG.12563	ADAM12	0.004217	0.01119	0.001469	0.087267	0.004045	0.021995	0.413054	0.13545	0.073486	0.003114	0.167189	-2.58045	0.0715975	1	down	no
15264	x	chr12	+	34885721	34899582	MSTRG.6425.1	2	208	MSTRG.6425	RF01848	3.73264	21.0091	4.66587	2.65344	4.02991	0.122152	1.47484	3.54467	2.33713	0.035386	4.80305	2.26395	0.0727255	1	up	no
80919	u	chr8	.	88252447	88253465	MSTRG.33196.1	1	1019	MSTRG.33196	.	0.300203	0.336306	0.0001	0.134354	0.265448	0.580706	1.12986	0.555575	0.296237	2.59478	0.200966	-2.31498	0.0729375	1	down	no
63634	u	chr5	+	86117759	86119439	MSTRG.26000.1	1	1681	MSTRG.26000	.	0.07807	0.584664	0.143987	0.092025	0.126954	0.272175	1.72253	0.084481	0.591305	1.83828	0.22749	-2.13612	0.073177	1	down	no
33642	u	chr15	-	128173893	128187387	MSTRG.14068.2	3	3744	MSTRG.14068	.	0.452091	0.599298	0.006677	1.00799	0.760734	0.012674	0.0001	0.323933	0.0001	0.069867	6.95099	2.79722	0.0733899	1	up	no
83428	u	chr9	-	25958146	25961879	MSTRG.34218.2	2	3246	MSTRG.34218	.	0.483975	2.27115	0.168055	0.403241	2.28912	0.361196	0.326176	0.202975	0.473328	0.251028	3.47775	1.79815	0.0737774	1	up	no
2118	i	chr1	+	77036846	77049233	MSTRG.942.1	2	8328	MSTRG.942	MFSD4B	0.233864	0.173628	0.051909	0.191792	0.25606	0.170933	2.64344	0.183559	0.131841	0.184737	0.273721	-1.86922	0.0739482	1	down	no
53169	i	chr3	+	94852490	94862808	MSTRG.21905.1	2	10054	MSTRG.21905	PRKCE	0.558542	1.89681	1.44219	2.21412	2.29368	0.648474	0.284012	0.988526	1.09752	0.369122	2.48117	1.31102	0.0740587	1	up	no
26281	i	chr14	.	47155852	47160047	MSTRG.10999.1	1	4196	MSTRG.10999	HORMAD2	2.92231	0.029541	0.035108	0.451386	0.152464	0.055538	0.34636	0.023313	0.010277	0.210699	5.55692	2.47428	0.0740878	1	up	no
79117	x	chr8	+	28072626	28114805	MSTRG.32473.1	2	1209	MSTRG.32473	ARAP2	0.007634	0.093226	0.100244	0.139633	0.032057	0.048365	0.756694	0.041033	0.096635	1.00355	0.191542	-2.38427	0.0743197	1	down	no
9050	i	chr10	-	22836891	22842299	MSTRG.3911.1	1	5409	MSTRG.3911	NR5A2	32.7435	9.93902	0.154815	3.51807	1.75042	1.38894	5.09904	1.63398	5.56694	0.605306	3.36541	1.75078	0.0743243	1	up	no
16942	i	chr12	-	56236545	56239247	MSTRG.7117.1	1	2703	MSTRG.7117	DNAH9	0.124307	0.026975	0.363465	0.310661	0.132888	0.447074	0.573893	0.661101	0.157899	1.79155	0.263883	-1.92203	0.0751797	1	down	no
63536	i	chr5	+	83084097	83096876	MSTRG.25964.1	1	12780	MSTRG.25964	ANO4	2.12616	2.4682	6.15813	4.20575	4.06071	1.84705	1.37726	2.69544	1.98068	0.947813	2.14946	1.10397	0.0753851	1	up	no
58897	j	chr4	-	117661652	117763117	MSTRG.24182.5	4	11581	MSTRG.24182	CDC14A	0.172691	0.107657	0.171292	0.130401	0.656012	0.120648	1.10611	0.172294	0.14223	2.75632	0.28808	-1.79546	0.0755274	1	down	no
51200	x	chr3	+	41057090	41057640	MSTRG.21086.1	3	371	MSTRG.21086	FAM173A	0.0001	0.0001	0.249697	0.0001	0.0001	0.0001	3.049	0.0001	0.0001	3.93537	0.0358066	-4.80363	0.0756291	1	down	no
29785	o	chr14	-	129684141	129741503	MSTRG.12444.1	3	3353	MSTRG.12444	MCMBP	0.087117	0.012187	0.336165	0.0001	1.01156	0.024372	0.063847	0.0001	0.025375	0.068571	7.93971	2.98909	0.0762466	1	up	no
63911	u	chr5	+	95949851	95965523	MSTRG.26137.1	1	15673	MSTRG.26137	.	0.609654	0.219168	0.263635	0.168988	0.788486	1.99199	0.418029	1.37729	0.621049	1.06715	0.374382	-1.41742	0.0763172	1	down	no
87980	u	chrX	-	40580383	40597620	MSTRG.36005.1	2	16011	MSTRG.36005	.	2.1592	2.82016	4.975	2.45054	1.95568	1.49774	1.69056	1.57503	0.896345	1.04842	2.14078	1.09814	0.0769151	1	up	no
55242	u	chr4	.	23831339	23856940	MSTRG.22748.1	1	25602	MSTRG.22748	.	0.185766	0.215895	0.059982	0.255947	0.143378	0.113608	2.31682	0.224525	0.058028	0.106406	0.305374	-1.71135	0.0784765	1	down	no
9389	i	chr10	+	27864114	27907718	MSTRG.4033.5	4	7394	MSTRG.4033	DAPK1	0.159754	1.48739	0.08245	1.00312	1.41326	0.736152	0.050061	0.055041	0.208794	0.039866	3.80394	1.9275	0.0787259	1	up	no
42015	i	chr2	-	9199737	9204910	MSTRG.17581.10	2	710	MSTRG.17581	AHNAK	2.41015	4.03342	8.16647	2.86832	4.36259	0.350549	2.37988	0.0001	0.0001	1.04333	5.78729	2.53289	0.078845	1	up	no
9045	i	chr10	-	22796618	22802676	MSTRG.3907.1	2	5584	MSTRG.3907	NR5A2	20.4343	6.18121	0.14382	2.3657	1.17693	0.747857	4.09678	1.19468	2.73857	0.523876	3.25766	1.70384	0.0796947	1	up	no
19657	i	chr13	+	52636966	52676590	MSTRG.8307.1	2	39113	MSTRG.8307	ENSSSCG00000027675	0.0001	1.0804	0.000228	1.94249	0.491946	0.335715	0.007871	0.029631	0.077473	0.0001	7.79778	2.96306	0.0797018	1	up	no
53372	i	chr3	.	101148449	101150810	MSTRG.21994.1	1	2362	MSTRG.21994	SOS1	0.101534	0.364133	0.332559	0.155718	0.166628	0.315527	0.843245	0.407557	0.492816	1.8713	0.285101	-1.81046	0.0799453	1	down	no
42025	i	chr2	-	9199739	9211832	MSTRG.17581.17	5	818	MSTRG.17581	ENSSSCG00000036669	2.58628	0.0001	11.8654	0.323078	0.097982	0.894337	0.0001	0.0001	0.0001	0.351078	11.9392	3.57764	0.0804034	1	up	no
17657	i	chr13	.	13783728	13785494	MSTRG.7471.1	1	1767	MSTRG.7471	NEK10	0.146434	0.162822	0.379599	0.112572	0.575883	0.333626	1.685	0.298346	0.318822	2.56257	0.264951	-1.9162	0.080616	1	down	no
26282	u	chr14	.	47167613	47169368	MSTRG.11000.1	1	1756	MSTRG.11000	.	1.92599	0.028287	0.018345	0.498736	0.079974	0.054914	0.112847	0.14026	0.024558	0.155838	5.22367	2.38506	0.0806241	1	up	no
45287	i	chr2	-	71835714	71842790	MSTRG.18613.3	2	6326	MSTRG.18613	INSR	0.14045	1.35181	0.186365	0.0001	1.16069	0.137729	0.099794	0.156467	0.104279	0.12524	4.55393	2.18711	0.0808859	1	up	no
53386	i	chr3	-	101276089	101280486	MSTRG.21997.1	2	3259	MSTRG.21997	SOS1	0.0001	0.111847	0.052257	0.246097	0.303516	0.071641	3.66102	0.218803	0.024908	0.067085	0.176536	-2.50196	0.0808985	1	down	no
16941	i	chr12	-	56156759	56158356	MSTRG.7116.1	1	1598	MSTRG.7116	DNAH9	0.418197	0.097911	0.184374	0.545393	0.208237	0.85979	1.32995	0.571802	0.263831	2.34711	0.27066	-1.88545	0.08145	1	down	no
67443	i	chr6	.	56370108	56370574	MSTRG.27714.1	1	467	MSTRG.27714	ENSSSCG00000032113	0.187346	0.0001	0.12137	0.702857	0.146886	0.913629	1.92651	0.155602	0.79833	1.8732	0.20443	-2.29032	0.0818202	1	down	no
5121	x	chr1	+	179667900	179686690	MSTRG.2201.2	3	543	MSTRG.2201	NEMF	0.005444	11.6543	0.081483	4.83547	1.04661	2.61973	111.982	0.419861	0.004044	2.66339	0.149744	-2.73943	0.0820583	1	down	no
9049	i	chr10	-	22829234	22836286	MSTRG.3910.1	2	1161	MSTRG.3910	NR5A2	46.5138	8.23538	0.084441	3.5756	1.73615	1.64126	5.43378	1.74445	6.07678	0.776134	3.83766	1.94023	0.0822056	1	up	no
33242	u	chr15	+	115022001	115025208	MSTRG.13916.1	1	3208	MSTRG.13916	.	0.337426	0.528777	0.342888	0.078893	0.29309	1.83269	0.705516	1.56088	0.078272	1.4008	0.28344	-1.81889	0.0824565	1	down	no
55359	i	chr4	+	31925242	31955072	MSTRG.22802.4	2	26904	MSTRG.22802	ZFPM2	0.001164	0.0001	0.565177	0.000777	0.0001	3.91883	8.7e-05	5.02199	0.000226	0.00124	0.0634416	-3.97843	0.0826204	1	down	no
72532	i	chr6	.	168768390	168771405	MSTRG.29761.1	1	3016	MSTRG.29761	ENSSSCG00000003965	0.373308	0.279985	0.351726	0.342859	0.223891	0.421482	1.30033	0.36731	0.521431	2.40798	0.313193	-1.67488	0.0827718	1	down	no
63542	i	chr5	+	83222237	83229983	MSTRG.25967.1	1	7747	MSTRG.25967	ANO4	2.12896	2.99181	7.47542	4.84616	5.2283	1.70997	1.37193	3.76764	2.33507	1.29937	2.16241	1.11264	0.0828222	1	up	no
9053	i	chr10	-	22860019	22862062	MSTRG.3914.1	1	2044	MSTRG.3914	NR5A2	12.9213	3.12972	0.119779	1.7671	1.16998	0.511415	2.05521	0.638378	1.73891	0.369414	3.59621	1.84648	0.0831815	1	up	no
2294	o	chr1	-	86416302	86419571	MSTRG.1016.1	2	3185	MSTRG.1016	SH3BGRL2	2.14544	4.00914	3.06858	3.64823	3.46264	6.32714	11.997	7.09002	2.02865	9.45529	0.44268	-1.17566	0.0832645	1	down	no
27974	i	chr14	+	79903158	79908338	MSTRG.11704.1	1	5181	MSTRG.11704	KCNMA1	1.66215	1.22541	3.7156	1.82438	2.48784	0.5942	0.191508	0.706028	0.839986	1.80183	2.64068	1.40091	0.0833679	1	up	no
74978	i	chr7	+	40786139	40807488	MSTRG.30740.1	2	20622	MSTRG.30740	CLIC5	0.75372	0.540011	0.748921	1.18143	0.465231	0.590548	5.46215	0.702591	0.538832	1.67082	0.411527	-1.28094	0.0837677	1	down	no
7200	i	chr1	+	253079948	253082042	MSTRG.3095.2	2	1401	MSTRG.3095	PTBP3	0.074265	0.081424	0.063665	0.099831	0.117324	0.006662	1.00738	0.0001	0.094572	1.55994	0.163569	-2.61203	0.0837761	1	down	no
16861	i	chr12	+	53735396	53744836	MSTRG.7078.2	1	9441	MSTRG.7078	ENSSSCG00000038144	1.94841	3.00272	3.18782	2.00626	4.50297	0.076982	1.47588	0.009795	0.000318	1.8737	4.26231	2.09164	0.0838308	1	up	no
23399	i	chr13	+	177613041	177668129	MSTRG.9862.2	2	25640	MSTRG.9862	ROBO2	0.22621	0.381773	0.520602	0.186573	0.930782	0.364771	0.220512	0.383592	5.78465	0.237202	0.321274	-1.63812	0.0839878	1	down	no
11894	i	chr11	+	20859952	20862946	MSTRG.5144.6	2	2076	MSTRG.5144	LRCH1	0.0001	0.0001	0.0001	0.206704	0.0001	0.0001	0.608264	1.91305	0.0001	1.53332	0.0510758	-4.29122	0.0841148	1	down	no
27977	i	chr14	+	80010176	80071421	MSTRG.11707.1	3	48762	MSTRG.11707	KCNMA1	1.49389	0.910594	3.48108	1.68123	3.1526	0.664163	0.303325	1.04085	0.784451	2.06385	2.20716	1.14219	0.0844608	1	up	no
86269	u	chr9	-	111476263	111507176	MSTRG.35285.1	1	30914	MSTRG.35285	.	0.579037	0.305214	2.32072	0.276238	2.29862	0.557266	0.263346	0.778428	0.37367	0.392052	2.44415	1.28933	0.0852209	1	up	no
18751	x	chr13	-	32589405	32593579	MSTRG.7908.2	2	3259	MSTRG.7908	RBM6	0.0001	0.002436	0.015374	0.266718	0.286163	0.771745	0.08912	0.430549	1.02247	0.785977	0.184134	-2.44117	0.0855527	1	down	no
63631	o	chr5	-	86071349	86195884	MSTRG.25999.1	11	24787	MSTRG.25999	RF01968	0.218947	0.16628	0.046281	0.049894	0.400901	0.052315	2.82801	0.020826	0.087746	0.269468	0.270781	-1.8848	0.0856891	1	down	no
47172	x	chr2	-	116419066	116514602	MSTRG.19332.2	3	11709	MSTRG.19332	MCC	3.21966	2.11796	2.46349	2.53093	2.07876	1.37741	1.08706	1.14499	1.51609	0.979756	2.03279	1.02346	0.0861835	1	up	no
40180	i	chr18	+	39068015	39076321	MSTRG.16875.1	1	8307	MSTRG.16875	NPSR1	1.87401	1.24112	0.389189	0.908602	3.10501	0.37066	0.669187	0.35466	0.280893	1.1179	2.69142	1.42837	0.0862433	1	up	no
10512	u	chr10	-	56555915	56559554	MSTRG.4545.1	1	3640	MSTRG.4545	.	0.0001	2.18074	3.44521	1.2402	2.27209	0.0001	0.0001	0.721334	0.0001	0.0001	12.6617	3.66239	0.0862746	1	up	no
71569	i	chr6	.	148256031	148257252	MSTRG.29330.1	1	1222	MSTRG.29330	UBE2U	0.159949	0.016533	0.138222	0.295912	0.103642	0.155024	1.29677	0.060465	0.051182	1.83373	0.210251	-2.24981	0.0870951	1	down	no
31158	i	chr15	-	46775010	46783207	MSTRG.13095.1	2	7891	MSTRG.13095	SORBS2	0.272073	0.298111	0.542275	0.551844	0.195539	0.790443	1.98502	0.490763	0.399679	1.36529	0.369662	-1.43572	0.0878487	1	down	no
14177	x	chr12	+	19714245	19725855	MSTRG.6028.1	2	610	MSTRG.6028	RF00004	0.355009	1.02311	0.577732	0.786431	0.762624	0.962251	3.03925	5.46523	2.59251	0.507245	0.278909	-1.84213	0.0879331	1	down	no
90523	u	chrY	-	7103779	7112537	MSTRG.37039.1	2	8424	MSTRG.37039	.	13.9286	0.860241	0.702103	0.950183	0.54661	0.929578	2.84591	0.679563	0.52627	0.475867	3.1129	1.63826	0.0883418	1	up	no
61682	u	chr5	.	36258028	36265568	MSTRG.25227.1	1	7541	MSTRG.25227	.	0.063564	0.1962	0.123099	0.221863	0.027031	0.188137	0.117348	0.074263	0.110011	1.99615	0.254136	-1.97633	0.0886734	1	down	no
28496	i	chr14	-	99739265	99754363	MSTRG.11945.1	2	15018	MSTRG.11945	PAPSS2	1.99618	1.32586	0.24278	1.04247	0.993095	3.0476	3.32387	4.41901	2.04121	0.621622	0.416283	-1.26436	0.0891051	1	down	no
85658	i	chr9	-	90749456	90751056	MSTRG.35026.1	1	1601	MSTRG.35026	DNAH11	0.157354	0.144693	0.26038	0.244004	0.199946	0.237932	1.59812	0.030768	0.160562	2.09111	0.244356	-2.03294	0.0897155	1	down	no
63543	i	chr5	+	83230371	83238080	MSTRG.25968.1	2	7614	MSTRG.25968	ANO4	2.77552	3.91053	9.22006	5.64015	6.90089	2.18045	1.61367	5.23839	3.06066	1.19375	2.14099	1.09828	0.0905513	1	up	no
63926	u	chr5	.	96089126	96090215	MSTRG.26152.1	1	1090	MSTRG.26152	.	0.45769	0.0393	0.133713	0.084434	0.424456	0.992118	0.572326	0.828678	0.304438	1.77995	0.254515	-1.97418	0.0917281	1	down	no
69165	o	chr6	+	80419848	80445465	MSTRG.28373.3	2	2950	MSTRG.28373	ZBTB40	2.39232	0.372127	0.883241	1.92146	0.446402	0.338473	0.220946	0.498219	0.548881	0.416557	2.97347	1.57215	0.0918988	1	up	no
86282	i	chr9	-	111657155	111678749	MSTRG.35296.1	1	21595	MSTRG.35296	ENSSSCG00000035172	0.81874	0.364183	3.35243	0.422988	3.8479	0.810413	0.423738	1.25109	0.50809	0.610497	2.44358	1.289	0.0922724	1	up	no
56498	i	chr4	-	76661762	76662472	MSTRG.23293.1	1	711	MSTRG.23293	ENSSSCG00000031906	0.201597	0.295263	0.812121	0.577896	0.220325	0.265478	3.73715	0.552287	0.060652	4.34343	0.235205	-2.08801	0.0928713	1	down	no
42688	i	chr2	+	16394146	16461886	MSTRG.17683.1	2	17499	MSTRG.17683	PHF21A	2.71249	1.38027	3.48707	3.00862	4.59241	1.48015	2.14819	1.57823	0.756683	0.046989	2.52583	1.33676	0.0931307	1	up	no
34504	i	chr16	.	21147636	21149537	MSTRG.14410.1	1	1902	MSTRG.14410	SPEF2	0.320445	0.438702	0.306423	0.359817	0.429712	0.591576	1.78986	0.297742	0.552025	2.58226	0.319104	-1.6479	0.0933263	1	down	no
90527	u	chrY	-	7136842	7137978	MSTRG.37043.1	1	1137	MSTRG.37043	.	9.94846	1.04643	0.216247	1.51166	0.310994	0.210672	1.57919	0.04294	0.692581	0.496107	4.3137	2.10893	0.0933412	1	up	no
25559	i	chr14	+	32743427	32757591	MSTRG.10753.2	2	13473	MSTRG.10753	ATXN2	0.0001	0.0001	0.0001	0.0001	0.569241	0.083581	2.18326	0.124631	0.417367	2.58742	0.105562	-3.24383	0.0936896	1	down	no
88289	u	chrX	-	45834695	45835810	MSTRG.36138.1	1	1116	MSTRG.36138	.	0.282582	0.22165	0.149572	0.222948	0.279749	0.758887	1.68696	0.879857	0.538469	0.203922	0.284286	-1.81459	0.0938306	1	down	no
80865	x	chr8	+	87564650	87591104	MSTRG.33174.1	2	2515	MSTRG.33174	RAB33B	0.207633	0.192104	0.20588	1.12454	1.30964	0.208665	0.176892	0.242112	0.0001	0.009886	4.76714	2.25312	0.094049	1	up	no
86285	i	chr9	-	111773616	111781918	MSTRG.35299.1	1	8303	MSTRG.35299	ENSSSCG00000035172	0.467443	0.314859	2.30726	0.350177	3.29918	0.619463	0.183311	0.754649	0.404264	0.437412	2.80894	1.49002	0.0941549	1	up	no
52632	i	chr3	-	75563909	75583941	MSTRG.21678.1	1	20033	MSTRG.21678	MEIS1	0.012163	0.141696	0.0001	0.0001	0.002161	0.0001	0.429919	0.099479	0.0001	1.32798	0.0840989	-3.57177	0.0942045	1	down	no
78796	u	chr8	-	10360078	10378938	MSTRG.32320.1	1	18861	MSTRG.32320	.	0.940669	0.599869	0.7775	0.713726	0.583187	0.897872	4.7083	0.800354	0.910177	0.794912	0.445651	-1.16601	0.0947068	1	down	no
28491	x	chr14	-	99678534	99736083	MSTRG.11943.1	2	10193	MSTRG.11943	PAPSS2	4.43303	2.96402	1.5319	3.61932	1.93005	5.72677	7.51547	11.6876	4.04495	2.45728	0.460623	-1.11834	0.0949224	1	down	no
27966	i	chr14	+	79691420	79697456	MSTRG.11697.1	1	6037	MSTRG.11697	KCNMA1	1.83344	1.28154	4.37121	2.10905	3.04901	0.983502	0.38507	0.872579	1.14243	1.95486	2.36853	1.24399	0.0949534	1	up	no
13210	o	chr12	-	3917444	3980451	MSTRG.5687.1	2	3367	MSTRG.5687	TNRC6C	0.230662	1.77918	0.475554	1.84682	2.00532	0.348092	0.372048	0.337269	0.415933	0.650097	2.98456	1.57752	0.0954312	1	up	no
81933	u	chr8	-	132242725	132340089	MSTRG.33629.1	2	14912	MSTRG.33629	.	0.642969	1.17542	0.998474	1.12741	1.02335	1.09995	1.81615	1.10973	2.18858	4.39907	0.468048	-1.09527	0.0955936	1	down	no
34217	j	chr16	+	43361	57816	MSTRG.14268.3	3	5079	MSTRG.14268	ROPN1L	0.224181	0.399723	0.415927	0.417661	0.203193	0.240952	1.27437	0.399947	0.219139	3.00566	0.323086	-1.63001	0.0959202	1	down	no
64890	u	chr6	+	17305061	17313396	MSTRG.26674.1	2	7548	MSTRG.26674	.	0.0001	0.021107	0.0001	0.024249	0.725639	0.0001	0.0001	0.0001	0.037348	15.06	0.0510806	-4.29108	0.0966844	1	down	no
22917	i	chr13	+	148536289	148560352	MSTRG.9693.1	2	23538	MSTRG.9693	NECTIN3	1.55511	1.52861	1.99033	2.57595	2.25544	0.0001	0.918761	0.876077	0.0001	0.003332	5.50801	2.46153	0.0967165	1	up	no
78889	i	chr8	+	11880865	11887987	MSTRG.32357.4	2	5343	MSTRG.32357	LDB2	0.0001	0.0001	2.44113	3.96563	0.0001	0.016364	0.0001	0.0001	0.430203	0.042532	13.0944	3.71087	0.0969267	1	up	no
11392	i	chr11	-	8781861	8789117	MSTRG.4897.1	2	2052	MSTRG.4897	ZAR1L	0.121882	0.285627	0.204971	0.282267	0.49933	2.11772	0.116887	1.29066	0.941688	0.355097	0.289105	-1.79034	0.0971026	1	down	no
80922	u	chr8	.	88301207	88302439	MSTRG.33199.1	1	1233	MSTRG.33199	.	0.497457	0.293583	0.0001	0.17853	0.230161	1.25575	0.483153	0.553359	0.821157	1.91437	0.23864	-2.06709	0.0972896	1	down	no
54758	u	chr4	-	3687264	3711512	MSTRG.22509.1	1	24249	MSTRG.22509	.	1.45799	1.08541	1.02478	0.76247	4.12291	0.73318	0.242883	0.794014	1.40384	0.678443	2.19438	1.13382	0.0976231	1	up	no
86279	u	chr9	.	111636309	111646100	MSTRG.35294.1	1	9792	MSTRG.35294	.	0.909236	0.403449	3.24285	0.40763	3.79813	0.778967	0.381183	1.00001	0.497382	0.752089	2.56957	1.36153	0.0976798	1	up	no
28500	i	chr14	+	99763589	99771118	MSTRG.11946.1	2	7105	MSTRG.11946	PAPSS2	2.13491	1.8271	0.596077	2.07807	0.850516	3.81224	3.74979	6.11754	2.10276	1.40426	0.435612	-1.19888	0.0978178	1	down	no
10962	i	chr10	-	69278797	69294029	MSTRG.4721.1	2	11706	MSTRG.4721	ZMYND11	0.169119	0.244196	0.211936	0.129199	0.067745	0.414997	0.473611	0.461589	0.738532	0.19944	0.359324	-1.47664	0.0979658	1	down	no
58296	i	chr4	.	103522980	103523542	MSTRG.23906.1	1	563	MSTRG.23906	VTCN1	2.20233	0.642963	0.773846	1.86569	1.47331	0.504722	0.312863	0.33074	0.689365	0.190056	3.43146	1.77882	0.0982741	1	up	no
34507	i	chr16	.	21341716	21342386	MSTRG.14412.1	1	671	MSTRG.14412	CAPSL	0.260776	0.127681	0.0001	0.295473	0.27382	0.215564	1.89619	0.134327	0.187789	2.28251	0.20309	-2.29981	0.0988054	1	down	no
86262	u	chr9	.	111355514	111377046	MSTRG.35278.1	1	21533	MSTRG.35278	.	0.52581	0.224954	1.82486	0.259064	1.75809	0.408326	0.237012	0.638942	0.260532	0.324372	2.4571	1.29696	0.0988677	1	up	no
13668	u	chr12	+	13745145	13754419	MSTRG.5869.1	2	9203	MSTRG.5869	.	0.236039	0.034888	0.580562	1.90787	0.403712	0.3368	0.267542	0.153708	0.064179	0.134542	3.30599	1.72508	0.0989525	1	up	no
48396	i	chr2	.	148146991	148147677	MSTRG.19870.1	1	687	MSTRG.19870	ENSSSCG00000031406	0.0001	0.124708	0.214178	0.100473	0.332828	0.22896	1.84885	0.212054	0.0001	2.06918	0.177165	-2.49684	0.0991117	1	down	no
557	i	chr1	-	13728127	13798902	MSTRG.343.2	3	25746	MSTRG.343	ENSSSCG00000004081	2.31596	0.553807	0.293408	0.386073	0.161813	2.28901	3.20843	2.85831	0.76505	0.543259	0.384006	-1.3808	0.0993561	1	down	no
4589	i	chr1	-	161419791	161430814	MSTRG.1935.1	1	11024	MSTRG.1935	CCBE1	0.561821	4.07894	0.578735	0.87189	1.55563	2.40056	0.590266	2.65422	3.04081	11.3077	0.382474	-1.38657	0.100038	1	down	no
53371	i	chr3	.	101143826	101146630	MSTRG.21993.1	1	2805	MSTRG.21993	SOS1	0.023393	0.476671	0.154079	0.209311	0.186793	0.326709	0.693257	0.449866	0.329774	1.75876	0.295149	-1.76048	0.100134	1	down	no
64917	i	chr6	+	17411361	17425396	MSTRG.26678.4	3	8303	MSTRG.26678	NFAT5	0.053423	0.474974	0.284161	0.0001	0.489973	0.077238	1.22683	0.278776	2.86045	0.881598	0.24463	-2.03132	0.100412	1	down	no
49577	i	chr3	+	13956360	14007707	MSTRG.20415.2	2	307	MSTRG.20415	ENSSSCG00000035984	3.03556	1.57938	1.75455	1.389	4.62747	0.0001	0.0001	0.0001	1.83593	0.010386	6.7074	2.74575	0.100684	1	up	no
12003	i	chr11	-	24122637	24127074	MSTRG.5199.1	1	4438	MSTRG.5199	EPSTI1	0.402353	0.328145	0.142428	2.76238	0.447287	0.269944	0.195492	0.332943	0.215426	0.275542	3.16641	1.66285	0.100703	1	up	no
63923	u	chr5	.	96069653	96070435	MSTRG.26149.1	1	783	MSTRG.26149	.	0.391279	0.243668	0.260418	0.220906	0.547592	1.77415	1.10604	1.27807	0.184559	1.48248	0.285627	-1.8078	0.10118	1	down	no
65827	i	chr6	.	42620458	42621195	MSTRG.27093.1	1	738	MSTRG.27093	ENSSSCG00000002857	0.964171	0.751906	1.78968	1.2873	0.433758	0.238158	0.059669	0.373261	0.650638	0.195786	3.44433	1.78422	0.101259	1	up	no
9187	o	chr10	+	24804672	24808165	MSTRG.3973.2	2	3370	MSTRG.3973	ENSSSCG00000038360	8.86256	6.32017	0.0001	0.0001	0.159987	0.0001	0.0001	0.0001	0.859335	0.0001	17.8461	4.15754	0.101712	1	up	no
3447	i	chr1	.	122272766	122275283	MSTRG.1489.1	1	2518	MSTRG.1489	FAM227B	0.738599	0.410226	2.59799	0.686154	5.33341	0.397558	0.937792	0.233852	0.251001	1.14645	3.29205	1.71899	0.101757	1	up	no
51173	o	chr3	-	40950722	40992922	MSTRG.21075.6	7	9847	MSTRG.21075	RF00026	1.57698	1.59432	1.84363	1.60816	1.53883	0.649364	0.631046	1.3543	0.505483	0.622253	2.16931	1.11723	0.101833	1	up	no
9047	o	chr10	+	22803603	22832506	MSTRG.3908.1	3	7900	MSTRG.3908	NR5A2	23.5101	7.54593	0.128526	2.7692	1.70878	1.08911	4.72887	1.51977	4.16971	0.592225	2.94739	1.55944	0.101949	1	up	no
9017	j	chr10	-	22579909	22677098	MSTRG.3891.2	8	2667	MSTRG.3891	ENSSSCG00000040123	4.28186	0.3862	0.087122	0.127175	0.439388	0.463026	0.134455	0.344824	0.3582	0.190814	3.56849	1.83531	0.102197	1	up	no
41756	i	chr2	+	8191694	8200924	MSTRG.17468.1	2	5599	MSTRG.17468	MARK2	0.940884	0.885195	0.376873	2.0057	1.64835	0.391207	0.602842	0.098113	0.679003	0.329545	2.78811	1.47929	0.102695	1	up	no
73309	u	chr7	.	19868446	19868991	MSTRG.30141.1	1	546	MSTRG.30141	.	0.160239	0.668212	0.087384	0.241779	0.104694	1.88741	0.328667	2.14828	0.520658	0.304385	0.243247	-2.0395	0.103177	1	down	no
36873	i	chr17	.	28305340	28306290	MSTRG.15480.1	1	951	MSTRG.15480	CFAP61	0.045347	0.179857	0.0001	0.048387	0.0001	0.0001	1.05679	0.0001	0.0001	2.67482	0.0733648	-3.76877	0.103194	1	down	no
4248	i	chr1	-	141888244	141916104	MSTRG.1812.1	1	27861	MSTRG.1812	UBE3A	0.0001	0.154081	0.0001	0.0001	0.199279	0.0001	0.29765	0.11188	0.0001	4.64864	0.0699158	-3.83824	0.104027	1	down	no
50278	i	chr3	-	25888306	25888545	MSTRG.20724.1	1	240	MSTRG.20724	GPRC5B	35.7498	4.78942	6.25057	6.22119	3.84534	3.82055	5.56884	1.30426	3.13232	4.17193	3.15905	1.65949	0.104028	1	up	no
86445	x	chr9	+	116238986	116292115	MSTRG.35362.1	2	9932	MSTRG.35362	RC3H1	0.628372	0.628026	0.582326	0.527429	0.490778	0.757087	1.53723	0.693819	0.716833	3.04983	0.422949	-1.24144	0.104125	1	down	no
86271	u	chr9	+	111548688	111559052	MSTRG.35287.1	2	10319	MSTRG.35287	.	0.542103	0.242982	2.83466	0.333022	2.70128	0.600819	0.251081	0.928692	0.332901	0.375441	2.67345	1.4187	0.104325	1	up	no
75107	x	chr7	-	46285710	46306078	MSTRG.30788.1	2	4142	MSTRG.30788	EFHC1	0.365378	0.686574	0.534267	0.650244	0.29113	0.743277	1.66205	0.651929	0.780625	3.03463	0.367783	-1.44307	0.104844	1	down	no
8297	i	chr10	-	625313	630775	MSTRG.3546.1	2	3280	MSTRG.3546	CDC73	0.055124	0.006298	0.770438	0.074435	2.2466	0.006359	0.031764	0.073271	0.036301	0.453142	5.24751	2.39163	0.105978	1	up	no
18356	i	chr13	+	30310938	30314974	MSTRG.7779.2	2	3751	MSTRG.7779	SCAP	6.65231	0.221656	0.191132	0.312266	0.0001	0.347235	0.338045	0.425375	0.205926	0.0001	5.60307	2.48622	0.106131	1	up	no
22862	u	chr13	+	147435175	147443532	MSTRG.9675.1	1	8358	MSTRG.9675	.	0.200226	0.380142	0.292593	0.863648	0.27173	0.438153	2.75708	0.49003	0.345288	1.28085	0.378118	-1.40309	0.106166	1	down	no
42029	i	chr2	-	9200790	9204199	MSTRG.17581.22	3	461	MSTRG.17581	AHNAK	5.04069	4.88147	9.41972	0.014346	4.48766	0.961341	2.89484	0.0001	0.003144	0.003875	6.1719	2.62572	0.106425	1	up	no
35387	x	chr16	+	50411649	50434392	MSTRG.14830.3	7	10545	MSTRG.14830	CPEB4	0.01363	0.175523	0.0001	0.261837	0.103764	0.186549	0.249677	0.0001	0.520947	2.05692	0.18408	-2.44159	0.106595	1	down	no
58155	x	chr4	+	100267393	100284211	MSTRG.23832.1	8	5121	MSTRG.23832	CHD1L	12.5996	1.97916	1.49497	2.68835	1.72085	1.63751	1.21959	1.96897	2.42429	1.71559	2.28453	1.1919	0.106937	1	up	no
27964	i	chr14	+	79536219	79543241	MSTRG.11695.1	1	7023	MSTRG.11695	KCNMA1	0.998847	0.733004	2.73246	1.07961	1.74658	0.530961	0.319645	0.475736	0.868161	0.841929	2.40101	1.26364	0.107048	1	up	no
29487	i	chr14	-	121351851	121378156	MSTRG.12354.1	2	2692	MSTRG.12354	SHOC2	0.417831	0.203073	1.2034	1.53213	0.0001	0.285026	0.104896	0.028014	0.249697	1.6e-05	5.02739	2.32981	0.107282	1	up	no
84475	i	chr9	-	50471419	50473480	MSTRG.34617.1	1	2062	MSTRG.34617	GRAMD1B	37.546	4.30747	1.38832	5.68387	2.03768	1.62541	9.6302	2.45981	2.31509	1.60203	2.8903	1.53122	0.107384	1	up	no
22965	i	chr13	-	151331962	151341246	MSTRG.9708.1	1	9285	MSTRG.9708	IFT57	0.115972	0.0001	0.014414	0.0001	0.0001	0.0001	0.0001	0.0001	0.0001	4.31134	0.0303093	-5.04409	0.107603	1	down	no
87243	u	chrX	+	526052	534190	MSTRG.35710.1	2	5286	MSTRG.35710	.	4.72274	0.293859	0.269066	0.221525	0.159312	0.146845	0.929759	0.213174	0.116571	0.135309	3.67559	1.87798	0.107662	1	up	no
9243	i	chr10	-	25502484	25507091	MSTRG.3984.1	2	3736	MSTRG.3984	ENSSSCG00000027557	0.141049	0.161297	0.157585	0.243306	0.13712	1.09053	1.10173	0.195811	0.907245	0.0001	0.255008	-1.97138	0.107731	1	down	no
81937	u	chr8	-	132340611	132396932	MSTRG.33632.1	2	3041	MSTRG.33632	.	0.407288	0.490779	0.73905	0.635223	0.445597	0.587938	1.27068	0.83033	1.8491	2.87116	0.366832	-1.44681	0.107761	1	down	no
52624	u	chr3	+	75480104	75482237	MSTRG.21675.1	2	2048	MSTRG.21675	.	0.180196	0.309446	0.79039	0.457904	0.198272	0.069792	5.05488	0.0001	0.125144	3.63061	0.218029	-2.19741	0.108463	1	down	no
86270	u	chr9	+	111508471	111548542	MSTRG.35286.1	1	40072	MSTRG.35286	.	0.694083	0.276087	2.46604	0.318058	2.47802	0.670237	0.292968	0.866886	0.420077	0.490221	2.27423	1.18538	0.108677	1	up	no
9030	u	chr10	-	22669940	22672556	MSTRG.3901.1	1	2617	MSTRG.3901	.	5.14906	0.0001	0.0001	0.618046	0.034949	0.0001	0.309921	0.0001	0.115348	0.0001	13.6341	3.76915	0.109099	1	up	no
55285	u	chr4	-	28727927	28731829	MSTRG.22768.1	1	3903	MSTRG.22768	.	0.044832	0.189981	1.63195	0.487115	0.011551	0.319385	0.015363	0.014221	0.148397	0.012133	4.64266	2.21495	0.110601	1	up	no
80936	u	chr8	.	90262788	90264595	MSTRG.33206.1	1	1808	MSTRG.33206	.	0.084255	0.180722	0.081287	0.205418	0.231857	0.426867	0.0001	1.35462	0.080013	1.77371	0.215536	-2.214	0.110648	1	down	no
68522	u	chr6	.	69599324	69599646	MSTRG.28105.1	1	323	MSTRG.28105	.	1.168	0.45101	0.443683	1.21955	0.539713	1.37732	3.62055	1.42392	4.91571	1.49614	0.297807	-1.74755	0.110832	1	down	no
63547	i	chr5	+	83272017	83288750	MSTRG.25969.1	2	16429	MSTRG.25969	ANO4	2.58229	3.46758	7.88885	4.73965	5.98996	1.96283	1.51693	4.71465	3.05755	1.12629	1.99288	0.994852	0.111171	1	up	no
61018	i	chr5	+	21607475	21608558	MSTRG.24969.1	1	1084	MSTRG.24969	SMARCC2	0.210812	0.189689	0.243867	0.189381	0.0709	0.044478	1.2361	0.255448	0.186423	1.79344	0.257303	-1.95846	0.111473	1	down	no
27967	i	chr14	-	79719572	79771541	MSTRG.11698.1	2	7978	MSTRG.11698	KCNMA1	1.68108	1.15367	3.90129	1.93025	2.60734	0.88408	0.234603	0.918051	0.988154	1.97093	2.25661	1.17416	0.11207	1	up	no
55244	u	chr4	.	23866956	23882969	MSTRG.22750.1	1	16014	MSTRG.22750	.	0.194919	0.1874	0.053118	0.219915	0.134732	0.099174	1.87377	0.211208	0.098633	0.090398	0.332922	-1.58675	0.112278	1	down	no
7240	u	chr1	.	253677495	253681539	MSTRG.3119.1	1	4045	MSTRG.3119	.	0.116813	0.262237	0.386919	0.187181	0.361734	2.02975	0.101413	1.43089	0.358768	0.272708	0.313551	-1.67323	0.112285	1	down	no
86283	i	chr9	-	111703275	111724609	MSTRG.35297.1	1	21335	MSTRG.35297	ENSSSCG00000035172	0.950621	0.469889	3.8461	0.40213	4.50986	0.980428	0.466471	1.47577	0.673832	0.786323	2.32239	1.21561	0.112326	1	up	no
89384	u	chrX	.	89654474	89655768	MSTRG.36612.1	1	1295	MSTRG.36612	.	0.532935	1.42356	1.41873	0.053301	0.246691	0.092022	0.067767	0.165371	0.481434	0.191858	3.68091	1.88006	0.112372	1	up	no
19506	u	chr13	-	47244102	47255058	MSTRG.8228.1	2	10633	MSTRG.8228	.	1.08572	3.64037	2.34686	0.767997	2.19979	4.85179	4.08522	4.44225	2.51261	4.74088	0.48664	-1.03907	0.112716	1	down	no
60327	x	chr5	+	14791853	14801517	MSTRG.24762.1	2	4466	MSTRG.24762	CCNT1	0.243505	0.350985	0.271879	0.207039	0.280154	2.47429	0.224605	0.678344	0.48908	0.240785	0.329566	-1.60136	0.11272	1	down	no
9040	i	chr10	+	22752985	22760380	MSTRG.3905.1	2	7178	MSTRG.3905	NR5A2	30.3135	9.21945	0.217263	3.1609	2.13582	0.993042	7.38648	1.44063	4.82629	0.751626	2.92549	1.54868	0.113051	1	up	no
72007	i	chr6	+	159236459	159243661	MSTRG.29547.1	1	7203	MSTRG.29547	SCP2	0.883629	0.518495	0.71069	0.72881	0.428658	0.664027	6.15389	0.432948	0.762119	0.478315	0.385133	-1.37657	0.11318	1	down	no
24764	i	chr14	.	13680449	13682618	MSTRG.10411.1	1	2170	MSTRG.10411	MSRA	0.181673	1.72849	0.767948	0.994585	0.216355	0.547195	0.090902	0.231629	0.129396	0.197588	3.24978	1.70034	0.11357	1	up	no
6390	i	chr1	-	228901542	228925054	MSTRG.2768.1	1	23513	MSTRG.2768	PCSK5	1.47551	2.07315	2.10122	1.82496	6.93853	1.41479	1.01269	1.90788	1.3731	1.45882	2.01099	1.00791	0.113781	1	up	no
63114	u	chr5	+	72762511	72771953	MSTRG.25803.1	2	7329	MSTRG.25803	.	0.500009	0.905996	0.390244	0.333617	0.661892	1.18466	2.24643	1.17949	1.02708	0.951608	0.423683	-1.23894	0.113821	1	down	no
72560	u	chr6	-	169803332	169821611	MSTRG.29772.1	3	3049	MSTRG.29772	.	5.23262	0.05823	0.091458	0.177947	0.05696	0.232443	0.62317	0.317007	0.034877	0.05615	4.44524	2.15226	0.113985	1	up	no
59009	i	chr4	+	122300177	122306553	MSTRG.24222.1	1	6377	MSTRG.24222	ENSSSCG00000039854	51.5317	11.1813	3.33716	12.8288	9.72484	7.09639	11.4682	7.29317	11.3504	2.92981	2.20748	1.1424	0.11411	1	up	no
69208	i	chr6	+	81042112	81056377	MSTRG.28389.1	2	13830	MSTRG.28389	LUZP1	0.428152	0.984827	1.12586	2.412	1.0411	0.306651	0.359199	0.761063	0.337606	0.876223	2.26904	1.18208	0.114405	1	up	no
63112	u	chr5	-	72675939	72682963	MSTRG.25801.1	2	6915	MSTRG.25801	.	0.79519	1.57361	0.502801	0.446116	0.989124	1.76867	3.40703	1.57546	1.76209	1.32319	0.437846	-1.19151	0.11454	1	down	no
34501	o	chr16	+	21094871	21166721	MSTRG.14407.1	2	1007	MSTRG.14407	SPEF2	0.193329	0.271228	0.097181	0.401222	0.1211	0.119019	1.86531	0.048917	0.104934	2.30813	0.243811	-2.03617	0.114844	1	down	no
63537	i	chr5	+	83097277	83103470	MSTRG.25965.1	1	6194	MSTRG.25965	ANO4	2.89235	3.50513	9.57781	7.21398	6.63688	2.92935	2.20196	4.69622	3.54961	1.47669	2.00798	1.00574	0.114851	1	up	no
35612	u	chr16	.	56373841	56386210	MSTRG.14942.1	1	12370	MSTRG.14942	.	0.240111	0.179927	2.02088	0.851708	1.68735	0.488471	0.324881	0.251242	0.381646	0.510466	2.54508	1.34771	0.114855	1	up	no
26543	x	chr14	-	49384276	49435804	MSTRG.11108.1	2	2894	MSTRG.11108	ENSSSCG00000010053	2.44437	0.0001	0.737799	0.0001	0.0001	0.0001	0.0001	0.144784	0.0001	0.0001	21.9202	4.45419	0.114959	1	up	no
60216	i	chr5	+	11779869	11782569	MSTRG.24719.1	2	2438	MSTRG.24719	RBFOX2	0.267437	0.107231	0.354262	3.76004	0.308327	0.141659	0.468688	0.257602	0.266841	0.23793	3.49474	1.80518	0.115035	1	up	no
39895	u	chr18	.	26463749	26495298	MSTRG.16710.1	1	31550	MSTRG.16710	.	0.360136	0.267361	0.099765	0.21477	0.233605	0.159799	1.96286	0.262199	0.166094	0.342527	0.406306	-1.29936	0.115183	1	down	no
34707	i	chr16	-	27127726	27146086	MSTRG.14500.1	1	18361	MSTRG.14500	GHR	0.0001	0.263293	0.0001	0.0001	0.057215	0.15665	1.90043	0.179066	0.008399	0.037295	0.140592	-2.83041	0.115347	1	down	no
213	i	chr1	.	5168778	5178739	MSTRG.84.1	1	9962	MSTRG.84	PACRG	0.242202	0.403762	0.41124	0.389994	0.187982	0.393006	1.29862	0.278885	0.34193	1.865	0.39143	-1.35317	0.115556	1	down	no
55246	u	chr4	.	23888922	23894218	MSTRG.22752.1	1	5297	MSTRG.22752	.	0.218879	0.143043	0.018409	0.284985	0.163512	0.098898	2.3049	0.251778	0.133492	0.088767	0.288004	-1.79584	0.115565	1	down	no
16944	i	chr12	-	56312403	56317112	MSTRG.7118.1	1	4710	MSTRG.7118	DNAH9	0.20713	0.219278	0.369372	0.526572	0.345917	0.446092	1.41855	0.387073	0.456456	1.79688	0.370311	-1.43319	0.115916	1	down	no
90525	u	chrY	-	7130579	7135943	MSTRG.37041.1	1	5365	MSTRG.37041	.	10.2151	0.619056	0.240992	0.896905	0.183565	0.623154	1.80756	0.244517	0.67238	0.458467	3.19375	1.67525	0.116102	1	up	no
63917	u	chr5	.	96018647	96024767	MSTRG.26143.1	1	6121	MSTRG.26143	.	0.4358	0.254423	0.166962	0.155928	0.700348	1.99911	0.373433	1.32417	0.37342	0.722353	0.357531	-1.48386	0.11625	1	down	no
39903	i	chr18	.	26570616	26593801	MSTRG.16718.1	1	23186	MSTRG.16718	KCND2	0.347215	0.29385	0.110204	0.225675	0.212473	0.169425	1.97651	0.272014	0.199655	0.359729	0.399491	-1.32376	0.116677	1	down	no
74357	x	chr7	-	31104710	31161014	MSTRG.30495.5	5	2641	MSTRG.30495	SCUBE3	0.0001	0.048823	0.144465	0.0001	0.037271	1.08583	0.0001	0.074029	0.351216	0.084428	0.144622	-2.78965	0.117396	1	down	no
82066	u	chr8	+	135420751	135429774	MSTRG.33693.1	5	7021	MSTRG.33693	.	0.755338	3.49357	0.337427	0.562297	3.50147	0.677056	0.176138	0.71553	1.20816	0.621404	2.54543	1.34791	0.117642	1	up	no
71441	i	chr6	.	145709236	145709933	MSTRG.29278.1	1	698	MSTRG.29278	WDR78	0.088452	0.55234	0.0001	0.061017	0.065516	0.206491	1.97788	0.0001	0.342647	1.75803	0.17909	-2.48125	0.117674	1	down	no
14055	i	chr12	-	18531208	18551953	MSTRG.6000.1	2	19607	MSTRG.6000	GJC1	0.331511	0.389039	0.144818	0.749973	4.16446	0.392495	0.223528	0.370775	0.892934	0.370566	2.56846	1.3609	0.118168	1	up	no
49361	i	chr3	.	10062516	10064519	MSTRG.20309.1	1	2004	MSTRG.20309	SRRM3	1.95392	0.12689	0.134769	0.905463	0.045639	0.116115	0.131843	0.02458	0.204504	0.349977	3.82904	1.93698	0.118587	1	up	no
86278	u	chr9	+	111611556	111635920	MSTRG.35293.1	2	17071	MSTRG.35293	.	0.71349	0.438015	3.02842	0.359332	3.19944	0.795974	0.304401	1.1925	0.499423	0.570822	2.30105	1.20229	0.118827	1	up	no
63416	i	chr5	+	79864641	79874681	MSTRG.25915.1	2	6959	MSTRG.25915	CHST11	0.248806	0.813558	0.004649	0.38851	0.675652	1.53714	1.22569	1.75187	1.84261	0.180646	0.32597	-1.61719	0.119366	1	down	no
86276	u	chr9	+	111587577	111610693	MSTRG.35292.1	2	22282	MSTRG.35292	.	0.835581	0.105232	0.765853	0.088505	3.5204	0.060328	0.372197	0.438611	0.485648	0.566658	2.76357	1.46654	0.119473	1	up	no
17545	u	chr13	-	10111557	10121113	MSTRG.7402.2	2	9215	MSTRG.7402	.	0.0001	0.0001	0.0001	2.05861	2.42934	0.0001	0.170605	0.0001	0.0001	0.0001	26.2463	4.71404	0.119475	1	up	no
66922	u	chr6	-	52878739	52881297	MSTRG.27526.1	2	2084	MSTRG.27526	.	0.190909	0.670779	0.104529	0.501337	0.251316	0.557971	1.93986	0.433987	0.886604	1.18889	0.343272	-1.54258	0.119761	1	down	no
11389	i	chr11	.	8766064	8769815	MSTRG.4894.1	1	3752	MSTRG.4894	ZAR1L	0.312937	0.543042	0.137606	0.301915	0.580241	2.2047	0.08278	1.54575	1.3363	0.531417	0.329023	-1.60374	0.11979	1	down	no
11391	i	chr11	-	8776374	8780313	MSTRG.4896.1	2	3655	MSTRG.4896	ZAR1L	0.109712	0.203689	0.117228	0.409889	0.768232	2.81103	0.048064	1.18752	1.27926	0.152804	0.293638	-1.76789	0.119856	1	down	no
63933	u	chr5	+	96163334	96173511	MSTRG.26159.1	2	275	MSTRG.26159	.	0.0001	0.0001	4.26525	5.70295	3.097	0.404598	0.0001	1.13132	0.0001	0.089587	8.03673	3.00661	0.120626	1	up	no
63912	u	chr5	.	95966215	95972733	MSTRG.26138.1	1	6519	MSTRG.26138	.	0.790664	0.11821	0.242485	0.124806	0.688013	2.2673	0.471959	1.41883	0.412996	0.934517	0.35676	-1.48697	0.121023	1	down	no
30026	i	chr14	-	135521466	135536565	MSTRG.12563.2	4	14334	MSTRG.12563	ADAM12	0.01526	0.013169	0.002522	0.066953	0.011638	0.022385	0.306443	0.011226	0.074975	0.010465	0.257447	-1.95765	0.121137	1	down	no
73069	j	chr7	+	13128376	13137673	MSTRG.29999.2	2	2263	MSTRG.29999	RBM24	0.066182	0.135367	1.05987	0.389649	0.483749	0.139731	0.047905	0.173951	0.104412	0.16173	3.40086	1.7659	0.121199	1	up	no
84474	x	chr9	-	50447250	50469759	MSTRG.34616.1	2	16537	MSTRG.34616	GRAMD1B	21.5872	2.76857	0.630547	3.54561	1.13252	0.917947	6.636	1.35789	1.23048	0.712465	2.73284	1.4504	0.121225	1	up	no
22861	u	chr13	+	147417935	147427982	MSTRG.9674.2	2	2165	MSTRG.9674	.	0.329916	0.480275	0.36839	0.876125	0.253022	0.527604	3.41862	0.592236	0.3158	1.79905	0.346854	-1.5276	0.121481	1	down	no
50104	u	chr3	-	21650390	21650802	MSTRG.20636.1	1	413	MSTRG.20636	.	4.50204	1.21657	1.78556	10.5042	2.96151	25.7301	2.84415	29.4841	3.48737	3.80509	0.320882	-1.63989	0.121502	1	down	no
61679	u	chr5	.	36229877	36234851	MSTRG.25224.1	1	4975	MSTRG.25224	.	0.0001	0.194682	0.15208	0.138316	0.053914	0.133342	0.066165	0.064359	0.099345	1.97613	0.230446	-2.1175	0.121754	1	down	no
41553	o	chr2	-	6783806	6811685	MSTRG.17405.2	2	17294	MSTRG.17405	RF01957	102.527	100.684	221.924	80.5207	139.148	55.2817	84.1523	101.521	37.0999	59.3458	1.9111	0.9344	0.122562	1	up	no
80925	u	chr8	.	88353758	88389847	MSTRG.33202.1	1	36090	MSTRG.33202	.	0.462749	0.473845	0.104773	0.275247	0.471456	0.848198	1.23487	0.763612	0.702973	0.244622	0.471255	-1.08542	0.122667	1	down	no
12277	i	chr11	+	47733348	47752902	MSTRG.5309.7	4	14568	MSTRG.5309	COMMD6	0.175901	0.148559	0.0001	0.377135	0.000888	0.000829	4.28999	0.256279	0.000938	0.004705	0.154321	-2.696	0.123043	1	down	no
55243	u	chr4	.	23857208	23866351	MSTRG.22749.1	1	9144	MSTRG.22749	.	0.125216	0.201891	0.062233	0.314615	0.120932	0.120732	2.08381	0.159682	0.096412	0.09559	0.322697	-1.63175	0.124468	1	down	no
63915	u	chr5	.	96003830	96006626	MSTRG.26141.1	1	2797	MSTRG.26141	.	0.357614	0.096454	0.136839	0.145793	0.609293	1.81702	0.263681	0.906739	0.433885	0.620722	0.332998	-1.58641	0.124539	1	down	no
61141	i	chr5	+	22255025	22257011	MSTRG.25015.1	1	1987	MSTRG.25015	RDH16	1.5084	1.88508	1.34485	1.38779	1.8891	7.46495	1.13822	5.768	2.71024	2.84536	0.402233	-1.3139	0.125721	1	down	no
12006	i	chr11	-	24198477	24206237	MSTRG.5202.1	1	7761	MSTRG.5202	EPSTI1	0.55552	0.569744	0.297869	2.64486	0.621455	0.402309	0.267259	0.467361	0.315279	0.411032	2.51682	1.3316	0.126103	1	up	no
78014	u	chr7	.	113307210	113310217	MSTRG.31993.1	1	3008	MSTRG.31993	.	0.0001	0.028482	0.016325	0.451291	0.015203	0.0001	3.32564	0.002787	0.07158	0.085273	0.146727	-2.76879	0.126105	1	down	no
42017	i	chr2	-	9199737	9211064	MSTRG.17581.12	5	820	MSTRG.17581	ENSSSCG00000036669	0.0001	5.03404	0.0001	1.58353	2.15931	0.0001	0.0182	0.808982	0.0001	0.0001	10.607	3.40694	0.12626	1	up	no
4931	i	chr1	-	168901540	168920818	MSTRG.2109.2	2	18013	MSTRG.2109	THSD4	0.067293	0.143016	0.116349	0.314371	0.042259	0.089221	0.014513	0.030674	0.063747	0.044638	2.81428	1.49277	0.126262	1	up	no
9052	i	chr10	-	22857700	22859174	MSTRG.3913.1	1	1475	MSTRG.3913	NR5A2	15.1383	3.35868	0.076499	1.54539	0.785428	0.63382	2.43262	0.906667	2.03846	0.259202	3.33361	1.73709	0.126507	1	up	no
53459	u	chr3	-	102054203	102066691	MSTRG.22019.2	2	5832	MSTRG.22019	.	0.0001	0.0001	0.085926	0.062784	0.16087	2.1846	0.019317	0.026603	0.062354	0.0001	0.135099	-2.88791	0.127009	1	down	no
39894	u	chr18	.	26431893	26462290	MSTRG.16709.1	1	30398	MSTRG.16709	.	0.439803	0.295433	0.088119	0.256556	0.17818	0.22791	1.90502	0.242261	0.204027	0.409776	0.420908	-1.24842	0.127275	1	down	no
81952	i	chr8	-	132682667	132686701	MSTRG.33640.1	1	4035	MSTRG.33640	MAPK10	0.707347	1.01827	0.898964	1.21339	0.906356	1.20436	2.59819	1.00733	2.54439	3.6261	0.432073	-1.21065	0.127278	1	down	no
39899	u	chr18	.	26517466	26539107	MSTRG.16714.1	1	21642	MSTRG.16714	.	0.441542	0.364916	0.134649	0.318169	0.257267	0.19864	2.48901	0.302994	0.232214	0.444028	0.413578	-1.27377	0.127768	1	down	no
90531	u	chrY	+	7142036	7146523	MSTRG.37047.1	2	2180	MSTRG.37047	.	15.9651	0.883242	0.377323	1.61801	0.332012	0.453225	2.84347	0.417656	1.3192	0.852292	3.25793	1.70396	0.127938	1	up	no
16945	i	chr12	-	56346736	56351358	MSTRG.7119.1	2	3364	MSTRG.7119	DNAH9	0.199506	0.233185	0.646966	0.643634	0.282233	0.491481	1.10444	0.680975	0.517217	2.62323	0.370204	-1.43361	0.129655	1	down	no
48004	i	chr2	-	140774634	140779969	MSTRG.19710.2	2	5126	MSTRG.19710	CTNNA1	0.217256	3.7936	2.52676	0.0001	0.0001	0.0001	0.0001	0.0001	0.0001	0.451608	14.4639	3.85439	0.129971	1	up	no
87244	u	chrX	-	568210	594233	MSTRG.35711.1	6	3971	MSTRG.35711	.	2.16094	0.315144	0.160682	0.117151	0.202658	0.058903	0.389602	0.009535	0.312562	0.042752	3.63505	1.86197	0.130133	1	up	no
86275	u	chr9	+	111573770	111587521	MSTRG.35291.1	1	13752	MSTRG.35291	.	0.678593	0.306139	2.64643	0.272843	2.8478	0.687152	0.300544	0.947429	0.381756	0.53756	2.36537	1.24207	0.130295	1	up	no
205	i	chr1	.	5105003	5109989	MSTRG.76.1	1	4987	MSTRG.76	PACRG	0.159013	0.455165	0.35734	0.298806	0.180895	0.280374	1.20981	0.211421	0.387591	1.90396	0.363426	-1.46027	0.130365	1	down	no
26456	i	chr14	+	48783456	48783765	MSTRG.11086.1	2	212	MSTRG.11086	ENSSSCG00000040522	0.583182	1.40001	0.859018	2.02049	0.570255	1.90474	4.986	0.493745	2.46897	8.10604	0.302511	-1.72494	0.13037	1	down	no
82233	i	chr9	-	268698	294932	MSTRG.33772.1	2	14229	MSTRG.33772	DENND5A	1.97756	2.99425	4.9225	3.40161	3.6601	2.46189	2.30004	0.038923	0.011668	1.14203	2.84757	1.50973	0.130422	1	up	no
52623	u	chr3	-	75374159	75397284	MSTRG.21674.1	5	2521	MSTRG.21674	.	0.03943	0.117404	0.632562	0.129414	0.440038	0.036897	2.38028	0.0001	0.058079	3.65339	0.221717	-2.17321	0.131449	1	down	no
90053	i	chrX	+	114549040	114559635	MSTRG.36868.5	2	4901	MSTRG.36868	ATP11C	0.0001	0.0001	0.0001	0.0001	0.149315	0.0001	1.13646	0.0001	1.65193	0.0001	0.0536864	-4.2193	0.131557	1	down	no
75024	o	chr7	-	41495694	41521154	MSTRG.30762.2	2	984	MSTRG.30762	PLA2G7	2.68852	1.53919	1.59938	1.7016	1.22563	0.004222	1.22134	0.116748	0.71931	0.0001	4.24613	2.08615	0.13176	1	up	no
7355	i	chr1	-	256633062	256638621	MSTRG.3157.1	1	5560	MSTRG.3157	PAPPA	6.76922	1.37558	0.44942	1.04132	0.463483	0.528942	0.769536	0.454257	1.77179	0.467993	2.52949	1.33885	0.131855	1	up	no
7354	i	chr1	-	256547301	256548042	MSTRG.3156.1	1	742	MSTRG.3156	PAPPA	8.79383	2.68719	0.521219	1.75912	1.36004	0.27259	1.12991	0.852202	2.4018	0.370848	3.00783	1.58872	0.132127	1	up	no
47003	i	chr2	-	105177682	105199898	MSTRG.19250.1	2	20097	MSTRG.19250	CHD1	0.679963	0.37271	1.84063	0.552148	3.36109	1.79709	2.70964	3.68614	3.06859	2.76199	0.485369	-1.04284	0.132583	1	down	no
16273	i	chr12	+	48695140	48702661	MSTRG.6857.1	2	4461	MSTRG.6857	PAFAH1B1	0.739128	0.584431	0.0001	0.954379	0.0001	2.24217	2.30331	3.25631	1.17869	0.528604	0.239575	-2.06145	0.133157	1	down	no
71964	i	chr6	.	158693337	158696451	MSTRG.29535.1	1	3115	MSTRG.29535	GLIS1	0.124797	0.108064	1.94546	0.289374	0.558025	0.076952	0.048676	0.443957	0.24644	0.109922	3.2677	1.70828	0.133498	1	up	no
80685	u	chr8	.	82364097	82368687	MSTRG.33093.1	1	4591	MSTRG.33093	.	0.249464	0.441618	0.588237	0.416104	0.323412	0.40373	1.09889	0.384436	0.75441	2.58577	0.386214	-1.37253	0.133583	1	down	no
59581	i	chr5	-	3147616	3149894	MSTRG.24416.1	1	2279	MSTRG.24416	CELSR1	0.3208	0.409122	0.796922	0.88327	0.399755	0.563035	2.57007	0.46126	0.167548	4.36892	0.345582	-1.5329	0.133633	1	down	no
86264	u	chr9	-	111386406	111397560	MSTRG.35280.1	2	10616	MSTRG.35280	.	0.440441	0.234889	1.83535	0.222052	1.91399	0.469361	0.257163	0.535315	0.294058	0.309053	2.49161	1.31708	0.133681	1	up	no
34656	o	chr16	-	25796748	25849939	MSTRG.14462.1	2	1176	MSTRG.14462	RPL37	3.79858	1.04357	6.77718	2.66536	6.44082	2.32661	0.656923	2.27646	2.02607	0.824476	2.55538	1.35354	0.133839	1	up	no
66909	i	chr6	-	52783232	52792824	MSTRG.27535.1	2	8918	MSTRG.27535	ARHGAP35	0.01214	0.341638	1.09839	3.60042	0.992478	0.179155	0.08234	0.244226	0.081778	1.28005	3.23689	1.69461	0.134906	1	up	no
40179	x	chr18	+	39042062	39066902	MSTRG.16874.2	3	10821	MSTRG.16874	NPSR1	0.549049	1.07108	0.11909	2.5459	7.85879	0.687055	0.886959	0.649183	0.473876	2.01256	2.57853	1.36655	0.135199	1	up	no
90530	u	chrY	.	7139589	7141373	MSTRG.37046.1	1	1785	MSTRG.37046	.	26.6718	1.28506	0.0001	2.04175	0.012174	0.0001	2.17636	0.0001	0.939755	1.13853	7.05335	2.81831	0.135208	1	up	no
90521	u	chrY	-	7094781	7130324	MSTRG.37037.1	4	5097	MSTRG.37037	.	15.2043	0.965441	0.532199	1.54098	0.27971	0.402235	3.62805	0.212233	1.13568	0.692974	3.05092	1.60924	0.135386	1	up	no
56379	u	chr4	+	71444574	71457244	MSTRG.23237.1	1	12671	MSTRG.23237	.	5.26882	2.005	0.854507	1.06528	1.04237	1.34293	1.05848	1.12838	1.02295	0.439096	2.05054	1.036	0.135986	1	up	no
33241	u	chr15	.	115013923	115015687	MSTRG.13915.1	1	1765	MSTRG.13915	.	0.579983	0.403127	0.589973	0.140435	0.528575	1.8006	0.920026	1.85356	0.048865	2.11978	0.332515	-1.58851	0.136321	1	down	no
18371	o	chr13	-	30432125	30485342	MSTRG.7784.1	2	2480	MSTRG.7784	SMARCC1	1.31478	0.121035	0.058036	0.030991	0.075031	2.71718	0.040109	0.057756	2.11725	1.81915	0.236967	-2.07724	0.136724	1	down	no
5002	u	chr1	+	169929399	169936018	MSTRG.2141.2	2	5404	MSTRG.2141	.	0.0001	0.693829	0.0001	0.0001	0.0001	0.958589	0.453263	0.475645	1.20512	1.82172	0.141266	-2.82351	0.136753	1	down	no
81631	i	chr8	+	125218168	125234096	MSTRG.33494.5	2	15594	MSTRG.33494	PDLIM5	0.403093	0.185865	0.226889	0.377412	3.01775	0.270587	7.76678	0.626893	0.243545	2.21599	0.378558	-1.40141	0.136829	1	down	no
11046	x	chr11	-	942254	964077	MSTRG.4748.1	4	7848	MSTRG.4748	IFT88	0.03122	0.136462	0.182649	0.051021	0.111505	0.018523	0.029142	0.04027	0.041328	0.039845	3.03272	1.60061	0.137301	1	up	no
81939	u	chr8	.	132363090	132364571	MSTRG.33634.1	1	1482	MSTRG.33634	.	0.372844	0.627707	0.526387	0.794203	0.54055	0.677319	1.41392	0.795126	1.94422	2.70789	0.379611	-1.3974	0.138053	1	down	no
83229	i	chr9	.	17425459	17427034	MSTRG.34128.1	1	1576	MSTRG.34128	CCDC90B	0.6806	0.630295	0.158508	0.515651	1.14627	1.69683	1.6307	1.95282	1.07287	1.95748	0.376782	-1.4082	0.138786	1	down	no
30721	u	chr15	-	25175563	25184106	MSTRG.12897.1	1	8544	MSTRG.12897	.	0.0001	0.067408	0.0001	0.0001	6.65225	0.294465	0.0001	0.128913	0.0001	0.0001	15.861	3.98741	0.139033	1	up	no
61750	i	chr5	+	39637791	39643087	MSTRG.25253.2	2	4074	MSTRG.25253	OSBPL8	0.0001	0.0001	0.0001	0.352183	0.174263	0.0001	0.909595	0.566594	1.11936	0.831304	0.153707	-2.70175	0.139578	1	down	no
54620	u	chr4	+	945645	949070	MSTRG.22482.2	3	2407	MSTRG.22482	.	0.986929	2.0561	0.435244	0.368132	0.11944	0.262219	0.413943	0.381731	0.088477	0.205706	2.93315	1.55245	0.139599	1	up	no
27309	i	chr14	.	62555210	62555593	MSTRG.11418.1	1	384	MSTRG.11418	PHYHIPL	13.0221	0.967994	0.589777	1.83045	0.963277	0.302543	0.894903	0.512661	0.285731	2.90686	3.54369	1.82525	0.14125	1	up	no
56378	u	chr4	-	71429174	71456736	MSTRG.23236.1	2	5335	MSTRG.23236	.	1.05978	0.292846	0.142665	0.20813	0.235512	0.234043	0.082908	0.156244	0.181856	0.077933	2.64527	1.40341	0.141611	1	up	no
35597	i	chr16	.	55465772	55467110	MSTRG.14930.1	1	1339	MSTRG.14930	WWC1	0.245026	0.095748	0.098184	0.187308	0.381251	0.140456	1.17331	0.073576	0.216533	1.81564	0.294637	-1.76299	0.141678	1	down	no
59580	i	chr5	.	3146564	3147172	MSTRG.24415.1	1	609	MSTRG.24415	CELSR1	0.058331	0.195555	0.833769	0.889043	0.375456	0.475301	2.79026	0.158329	0.271942	4.58193	0.284154	-1.81526	0.142242	1	down	no
71686	o	chr6	+	151136167	151198625	MSTRG.29388.3	2	20776	MSTRG.29388	ENSSSCG00000039434	0.063965	0.022918	1.64495	0.105788	0.0001	0.122816	0.122452	0.014602	0.116265	0.068702	4.13122	2.04657	0.143067	1	up	no
42779	u	chr2	+	20472785	20528870	MSTRG.17724.1	2	7527	MSTRG.17724	.	0.400348	0.019576	0.08474	0.065045	0.093955	0.071399	2.13132	0.048943	0.14734	0.012562	0.2752	-1.86145	0.143201	1	down	no
55353	i	chr4	-	31907044	31954451	MSTRG.22803.1	2	3061	MSTRG.22803	ZFPM2	4.44263	0.035367	0.000307	0.0001	0.0001	0.020728	0.0001	0.0001	0.0001	0.343606	12.2822	3.61849	0.143234	1	up	no
70326	i	chr6	+	98238578	98253653	MSTRG.28813.3	3	9529	MSTRG.28813	VAPA	1.13053	1.67127	1.18836	0.602177	0.0001	0.0001	0.069331	0.425812	0.412536	0.0001	5.05843	2.33869	0.143927	1	up	no
48804	j	chr3	+	3996867	4006571	MSTRG.20072.2	2	1739	MSTRG.20072	ENSSSCG00000033217	0.0001	1.12562	1.54513	0.382314	0.132737	0.371651	0.0001	0.0001	0.0001	0.0001	8.56307	3.09813	0.144058	1	up	no
68379	u	chr6	.	65800660	65803528	MSTRG.28046.1	1	2869	MSTRG.28046	.	0.11387	0.635679	0.20381	0.687808	0.117512	1.25051	0.309042	1.21599	2.01131	0.321591	0.344269	-1.53839	0.144868	1	down	no
84471	i	chr9	-	50424844	50440618	MSTRG.34615.1	1	15775	MSTRG.34615	GRAMD1B	31.2711	3.2455	0.726956	4.58436	1.92836	1.38961	10.2137	1.80789	1.56773	0.755087	2.65389	1.40811	0.144942	1	up	no
560	i	chr1	-	13771386	13777779	MSTRG.346.1	2	6354	MSTRG.346	ENSSSCG00000004081	0.0001	1.81811	0.962165	1.42556	0.0001	3.145	3.80577	3.42853	2.8699	2.40755	0.268641	-1.89625	0.144976	1	down	no
88763	o	chrX	+	59286803	59309312	MSTRG.36349.5	2	22219	MSTRG.36349	RF01880	0.0001	18.2467	0.0001	0.0001	24.6335	0.0001	0.0001	0.0001	2.00902	0.003064	21.3083	4.41334	0.145182	1	up	no
39906	i	chr18	.	26610997	26615057	MSTRG.16721.1	1	4061	MSTRG.16721	KCND2	0.25532	0.310055	0.084686	0.192391	0.219188	0.10479	1.94483	0.265221	0.266265	0.400723	0.356036	-1.4899	0.145337	1	down	no
86265	u	chr9	.	111399487	111406984	MSTRG.35281.1	1	7498	MSTRG.35281	.	0.468644	0.193193	1.70278	0.227009	2.06735	0.326122	0.243103	0.563964	0.282122	0.41713	2.5425	1.34625	0.145567	1	up	no
29689	u	chr14	.	128051673	128061367	MSTRG.12431.1	1	9695	MSTRG.12431	.	0.713975	1.6481	0.822824	0.29867	0.619037	2.17257	0.819861	1.63522	2.36493	1.82855	0.465089	-1.10442	0.145614	1	down	no
39900	u	chr18	.	26540371	26550106	MSTRG.16715.1	1	9736	MSTRG.16715	.	0.288597	0.340318	0.058914	0.264495	0.186799	0.204129	2.06093	0.226421	0.172978	0.351519	0.377697	-1.4047	0.145667	1	down	no
58361	u	chr4	.	105544186	105550552	MSTRG.23940.1	1	6367	MSTRG.23940	.	0.216303	0.407854	0.336857	0.110076	0.205158	0.320519	0.222569	0.319891	0.289437	2.37062	0.362257	-1.46491	0.146043	1	down	no
83966	u	chr9	+	40102043	40102538	MSTRG.34422.1	1	496	MSTRG.34422	.	15.4709	1.20053	1.1308	1.74595	1.04328	1.08582	2.5545	1.22239	0.21859	1.474	3.14119	1.65131	0.146385	1	up	no
62491	x	chr5	+	62224003	62226792	MSTRG.25561.1	2	851	MSTRG.25561	ENSSSCG00000000657	0.849205	2.15165	0.635613	1.33403	2.24712	0.029458	0.578594	0.988736	0.0001	0.0001	4.51952	2.17617	0.146623	1	up	no
59861	u	chr5	.	7293689	7294701	MSTRG.24565.1	1	1013	MSTRG.24565	.	0.379467	0.154004	0.21762	0.380482	0.090287	0.190215	1.67392	0.117257	0.119257	2.05204	0.294234	-1.76497	0.146701	1	down	no
88283	u	chrX	.	45687105	45687537	MSTRG.36140.1	1	433	MSTRG.36140	.	0.395157	0.336435	0.598801	0.734116	0.149431	2.49215	0.626419	2.88911	0.174464	1.03369	0.306817	-1.70455	0.147207	1	down	no
55356	x	chr4	+	31915220	31978593	MSTRG.22802.3	3	32036	MSTRG.22802	ZFPM2	0.083784	0.087825	0.134556	1.03245	0.129236	0.104925	0.082898	0.112914	0.112019	0.173571	2.50346	1.32393	0.147358	1	up	no
42693	i	chr2	-	16437294	16465299	MSTRG.17684.3	3	21055	MSTRG.17684	PHF21A	0.000936	0.0001	0.0001	0.182025	0.000396	0.002895	0.194081	1.51975	0.000595	0.0001	0.106879	-3.22594	0.147415	1	down	no
71962	i	chr6	.	158683316	158687142	MSTRG.29533.1	1	3827	MSTRG.29533	GLIS1	0.068341	0.138964	2.06445	0.346142	0.693958	0.088056	0.03452	0.526818	0.320386	0.089471	3.1266	1.6446	0.14742	1	up	no
27971	i	chr14	+	79817549	79819059	MSTRG.11701.1	1	1511	MSTRG.11701	KCNMA1	3.3646	2.20307	6.68093	4.46706	6.2639	1.20406	0.492955	1.87417	2.38914	3.78876	2.3571	1.23701	0.148043	1	up	no
55531	j	chr4	+	37074366	37097724	MSTRG.22873.1	5	1402	MSTRG.22873	COX6C	0.067449	1.231	0.335677	0.086538	0.134604	0.07003	4.94256	0.099575	0.196468	1.48611	0.273045	-1.87279	0.1492	1	down	no
48489	x	chr2	-	150517748	150529902	MSTRG.19923.2	5	1596	MSTRG.19923	PCYOX1L	0.104223	1.98957	0.056639	0.029832	0.035937	2.50046	0.526239	0.178952	1.31865	4.05248	0.258396	-1.95235	0.149345	1	down	no
10960	i	chr10	+	69252480	69294029	MSTRG.4720.2	3	37109	MSTRG.4720	ZMYND11	0.03427	0.022321	1.19889	1.1478	0.221076	0.02808	0.280612	3.26043	0.765774	3.48907	0.335426	-1.57593	0.149402	1	down	no
75856	i	chr7	-	59243180	59251904	MSTRG.31097.1	1	8725	MSTRG.31097	CCDC33	0.414806	0.623495	0.064523	0.712628	0.182368	0.376103	4.90373	0.217521	0.182365	0.086838	0.346449	-1.52928	0.149789	1	down	no
19352	u	chr13	-	43138750	43160506	MSTRG.8161.1	2	21702	MSTRG.8161	.	0.664195	0.503046	5.84652	1.38773	0.562925	0.819005	0.573166	1.5702	0.683324	0.502153	2.16122	1.11185	0.150565	1	up	no
44722	i	chr2	.	66537059	66539317	MSTRG.18425.1	1	2259	MSTRG.18425	ENSSSCG00000022634	0.685278	1.16426	6.10627	0.883547	2.20501	1.47579	1.09063	0.715813	0.176534	0.657731	2.68295	1.42382	0.150574	1	up	no
558	i	chr1	-	13752104	13771292	MSTRG.344.1	2	19107	MSTRG.344	ENSSSCG00000004081	3.30192	2.00545	1.24096	1.45656	0.814326	3.72953	3.78888	3.93318	2.94879	2.3986	0.524985	-0.929652	0.150686	1	down	no
86261	u	chr9	.	111349515	111350430	MSTRG.35277.1	1	916	MSTRG.35277	.	0.673507	0.092867	1.95536	0.175827	2.21702	0.537186	0.178997	0.411713	0.141068	0.303717	3.25214	1.70139	0.150774	1	up	no
211	i	chr1	.	5150876	5157735	MSTRG.82.1	1	6860	MSTRG.82	PACRG	0.240263	0.601041	0.305084	0.414583	0.271544	0.228397	1.10273	0.48729	0.562574	2.1005	0.408908	-1.29015	0.15081	1	down	no
81936	u	chr8	-	132281323	132350571	MSTRG.33631.1	2	11035	MSTRG.33631	.	0.560869	0.914658	0.804177	0.87593	0.91224	0.874767	1.37107	0.920513	1.84	3.14755	0.498887	-1.00322	0.151049	1	down	no
74030	i	chr7	.	24966668	24967410	MSTRG.30375.1	1	743	MSTRG.30375	ENSSSCG00000001456	0.162015	0.049885	0.048278	1.34584	0.245757	2.18607	0.272586	0.740324	0.716442	2.62308	0.283211	-1.82005	0.151145	1	down	no
73156	u	chr7	-	16727614	16845481	MSTRG.30038.2	4	4092	MSTRG.30038	.	0.338128	0.222594	2.69008	0.908668	0.17963	0.719161	0.124944	0.337624	0.262384	0.049242	2.90561	1.53884	0.151828	1	up	no
65902	i	chr6	-	43976456	43980264	MSTRG.27130.1	1	3809	MSTRG.27130	KIAA0355	1.86215	2.22468	2.45836	3.08133	2.61439	0.189322	3.05425	0.223303	0.187315	0.866264	2.7079	1.43717	0.152838	1	up	no
28619	x	chr14	-	103581155	103660690	MSTRG.11985.1	2	5025	MSTRG.11985	BTAF1	1.51052	1.18668	1.56284	1.34967	3.07038	0.658762	0.684296	0.889901	1.03689	0.786333	2.13996	1.09759	0.153191	1	up	no
77450	u	chr7	-	95528755	95545501	MSTRG.31741.1	1	16747	MSTRG.31741	.	0.933353	0.927091	0.473761	0.205972	0.725211	0.836237	0.899329	0.925197	2.29467	1.73186	0.488297	-1.03417	0.153466	1	down	no
86259	u	chr9	.	111321834	111326528	MSTRG.35275.1	1	4695	MSTRG.35275	.	0.447434	0.226902	1.56069	0.186152	1.87186	0.406222	0.112384	0.700758	0.145234	0.227356	2.69671	1.4312	0.154475	1	up	no
86266	u	chr9	+	111407607	111419814	MSTRG.35282.1	2	12184	MSTRG.35282	.	0.557108	0.197066	1.90009	0.218505	1.88476	0.454321	0.163587	0.707297	0.32842	0.37772	2.34206	1.22778	0.154606	1	up	no
53831	i	chr3	.	111967292	111974964	MSTRG.22179.1	1	7673	MSTRG.22179	SLC5A6	0.104785	0.38371	1.00641	0.770532	0.862097	0.747801	0.257747	1.05802	1.13314	4.41061	0.411122	-1.28236	0.15521	1	down	no
9042	i	chr10	-	22761844	22775616	MSTRG.3906.2	2	7016	MSTRG.3906	NR5A2	20.7099	7.31983	0.031419	0.0001	1.13239	0.855597	3.4675	0.288401	1.42921	0.0001	4.83273	2.27284	0.155663	1	up	no
48601	i	chr2	+	151702159	151707439	MSTRG.19964.1	1	5281	MSTRG.19964	ENSSSCG00000021427	0.0001	0.0001	2.04716	2.66351	0.0001	0.0001	0.0001	0.107488	0.279765	0.0001	12.1557	3.60356	0.155845	1	up	no
64193	u	chr6	-	456966	478985	MSTRG.26294.3	2	20762	MSTRG.26294	.	0.320049	0.002853	2.33105	0.046564	1.12563	0.001998	0.121541	0.681937	0.242756	0.066228	3.43319	1.77955	0.155978	1	up	no
59416	i	chr4	.	130785255	130789988	MSTRG.24381.1	1	4734	MSTRG.24381	WDR63	0.689018	1.91799	0.984976	0.829888	0.594571	1.69298	3.45102	1.03796	1.77684	2.883	0.462695	-1.11187	0.156388	1	down	no
30043	o	chr14	+	136173183	136215477	MSTRG.12573.1	2	734	MSTRG.12573	DOCK1	3.14448	2.64839	3.06769	0.351952	3.82656	1.46812	0.22376	0.228818	1.64077	1.14932	2.76792	1.4688	0.156426	1	up	no
41120	i	chr2	.	3013991	3017111	MSTRG.17265.1	1	3121	MSTRG.17265	ENSSSCG00000031191	0.810815	0.609759	0.507105	0.607071	0.665027	1.5169	2.11901	0.99333	0.783614	2.01855	0.430575	-1.21566	0.157885	1	down	no
19712	u	chr13	+	54742290	54788988	MSTRG.8290.1	2	46675	MSTRG.8290	.	0.881303	0.0001	4.88596	1.12013	2.03105	0.130234	0.137009	1.09832	1.28465	0.206539	3.12192	1.64243	0.158295	1	up	no
41527	x	chr2	+	6745108	6757209	MSTRG.17404.4	2	5294	MSTRG.17404	RF01684	0.0001	0.0001	2.41507	0.40204	1.87261	13.2786	17.4228	1.48139	0.0001	0.0001	0.145727	-2.77866	0.158321	1	down	no
32687	j	chr15	+	96313874	96324447	MSTRG.13700.4	5	6319	MSTRG.13700	NABP1	1.09004	2.50997	0.986372	4.4768	1.49208	5.73776	5.20905	2.58551	7.21849	0.985086	0.485614	-1.04212	0.1584	1	down	no
84822	u	chr9	-	60466478	60472341	MSTRG.34715.1	2	5834	MSTRG.34715	.	0.197135	0.568793	0.454558	0.503995	0.496245	0.555951	0.586443	0.396024	0.263019	3.83292	0.39414	-1.34322	0.159022	1	down	no
81895	i	chr8	+	131824905	131847764	MSTRG.33603.1	2	22581	MSTRG.33603	AFF1	0.616422	0.598651	0.101324	5.06843	0.413394	0.083328	0.426837	0.850433	0.770827	0.0001	3.18937	1.67327	0.159066	1	up	no
16160	i	chr12	-	47618013	47635129	MSTRG.6816.1	2	15854	MSTRG.6816	ENSSSCG00000038989	1.20422	0.391407	1.03714	0.622967	1.12711	2.31586	1.72731	1.07039	2.37239	0.90014	0.522633	-0.93613	0.160001	1	down	no
59007	i	chr4	-	122256725	122269475	MSTRG.24220.1	2	12439	MSTRG.24220	ENSSSCG00000039854	29.7761	8.04016	2.20704	7.03526	6.24252	5.64991	6.13023	4.97038	8.45405	1.91328	1.96553	0.97492	0.160627	1	up	no
75143	x	chr7	+	46544948	46580982	MSTRG.30803.3	3	3513	MSTRG.30803	GSTA2	6.17196	3.97478	0.028541	2.93822	1.32676	0.53538	0.787907	1.38669	2.55592	0.132701	2.67482	1.41944	0.16076	1	up	no
83704	i	chr9	-	34509697	34565197	MSTRG.34312.1	2	19902	MSTRG.34312	PDGFD	1.16752	0.545778	0.969348	0.713331	1.34775	0.752501	2.66703	1.60879	2.46852	1.32752	0.537572	-0.895471	0.162125	1	down	no
84458	i	chr9	-	50322352	50331422	MSTRG.34612.1	2	6037	MSTRG.34612	GRAMD1B	4.35565	1.4977	0.324671	1.05211	1.40717	0.306348	0.959733	1.10022	1.11424	0.337827	2.26204	1.17762	0.162202	1	up	no
56048	i	chr4	-	61132278	61141432	MSTRG.23074.1	1	9155	MSTRG.23074	PI15	3.54454	1.93074	8.48001	2.803	5.90767	0.929111	1.97726	2.66436	0.183965	4.7583	2.15599	1.10835	0.162244	1	up	no
56045	j	chr4	-	61113292	61132218	MSTRG.23073.2	2	17950	MSTRG.23073	PI15	1.26612	1.42903	3.42003	1.27601	2.94064	0.985164	0.683387	0.75917	1.02182	2.07697	1.8695	0.902653	0.163547	1	up	no
82679	i	chr9	+	6223230	6260659	MSTRG.33882.1	2	3714	MSTRG.33882	STIM1	0.195514	0.165835	0.505278	0.602911	0.381403	0.219158	0.243177	1.99229	0.45591	2.02142	0.375296	-1.4139	0.163551	1	down	no
15918	i	chr12	+	45035062	45039442	MSTRG.6700.1	2	4060	MSTRG.6700	FAM222B	0.0001	1.94684	0.458664	2.64105	0.911227	0.000969	0.0001	0.857051	0.0001	0.0001	6.94134	2.79521	0.163629	1	up	no
56043	x	chr4	+	61094574	61138017	MSTRG.23072.1	2	9261	MSTRG.23072	PI15	0.281126	0.213941	0.0001	0.0001	0.065615	2.01185	0.0001	0.0001	1.96472	0.11285	0.137148	-2.8662	0.164029	1	down	no
65864	i	chr6	-	43402536	43404883	MSTRG.27109.1	1	2348	MSTRG.27109	CHST8	1.41799	0.0001	0.020913	2.20555	0.226897	0.0001	0.177502	0.371487	0.0001	0.0001	7.04812	2.81724	0.164204	1	up	no
24896	u	chr14	.	17936016	17939920	MSTRG.10476.1	1	3905	MSTRG.10476	.	0.474353	0.351267	1.77533	0.490414	0.6318	0.409724	0.278158	0.042987	0.443137	0.263207	2.59055	1.37326	0.164216	1	up	no
39317	u	chr18	-	10646140	10647521	MSTRG.16455.1	1	1382	MSTRG.16455	.	2.06993	3.85637	0.809544	0.671667	1.40854	0.650265	1.17795	0.866949	0.20948	0.491117	2.59619	1.3764	0.164584	1	up	no
74767	o	chr7	+	37866920	37878620	MSTRG.30664.2	2	10088	MSTRG.30664	RF00100	0.533775	0.768925	3.09294	1.59428	2.00549	0.727843	0.573319	0.888381	0.972311	0.785543	2.02549	1.01827	0.164843	1	up	no
31640	u	chr15	-	61113411	61125177	MSTRG.13285.1	2	2156	MSTRG.13285	.	0.52296	0.32506	2.07099	0.544257	0.51109	0.254425	0.112335	0.657413	0.066377	0.320657	2.81628	1.49379	0.164972	1	up	no
39934	u	chr18	+	28945592	28946250	MSTRG.16732.1	1	659	MSTRG.16732	.	1.42531	1.51524	2.85876	2.67425	3.01814	1.06709	0.367282	1.13713	0.84582	1.08293	2.55357	1.35251	0.165334	1	up	no
88762	o	chrX	+	59286752	59309312	MSTRG.36349.4	3	22175	MSTRG.36349	RF01880	0.0001	0.0001	4.06507	0.942965	5.71895	0.0001	0.752139	0.0001	0.0001	0.0001	14.2546	3.83336	0.165413	1	up	no
20826	i	chr13	-	89834426	89863578	MSTRG.8763.5	2	25038	MSTRG.8763	WWTR1	0.071837	0.0001	0.0001	0.0001	0.0001	0.0001	0.624798	0.0001	0.561482	0.0001	0.0608783	-4.03793	0.165487	1	down	no
78795	x	chr8	-	10350779	10406166	MSTRG.32319.1	3	6382	MSTRG.32319	CPEB2	0.740447	0.519964	0.569317	0.540751	0.56247	0.599913	4.13606	0.581382	0.646661	0.627842	0.444935	-1.16833	0.165742	1	down	no
56217	i	chr4	+	65716217	65722271	MSTRG.23166.1	1	6055	MSTRG.23166	SULF1	2.68152	1.33836	3.67018	3.44885	5.76011	1.80182	1.78487	2.02558	1.83199	1.48037	1.89352	0.921074	0.165831	1	up	no
65823	j	chr6	+	42578655	42583203	MSTRG.27090.2	3	899	MSTRG.27090	NUDT19	1.91075	0.217576	0.053733	1.75175	0.350198	0.694183	0.163878	0.077705	0.085162	0.269949	3.31868	1.73061	0.165861	1	up	no
12251	u	chr11	+	46447753	46457473	MSTRG.5298.1	2	9415	MSTRG.5298	.	0.411042	1.08091	1.7639	0.0001	0.87432	3.09975	2.02715	1.64652	1.72527	2.46392	0.37676	-1.40828	0.165878	1	down	no
71341	u	chr6	.	140128212	140128599	MSTRG.29235.1	1	388	MSTRG.29235	.	0.0001	2.4159	1.20141	3.31993	1.68487	0.0001	0.0001	0.0001	1.24909	0.0001	6.9006	2.78672	0.166021	1	up	no
24894	u	chr14	.	17925304	17927888	MSTRG.10474.1	1	2585	MSTRG.10474	.	0.478337	0.470698	1.93619	0.45589	0.475768	0.430179	0.430647	0.058857	0.225979	0.284175	2.66945	1.41654	0.166177	1	up	no
42839	i	chr2	+	24981696	24995042	MSTRG.17762.2	1	13347	MSTRG.17762	LDLRAD3	2.00536	0.184097	0.664042	2.02103	3.25939	3.00031	1.48384	2.94331	3.94302	5.37974	0.485601	-1.04216	0.1665	1	down	no
72993	u	chr7	.	10696621	10700224	MSTRG.29959.1	1	3604	MSTRG.29959	.	0.368745	1.92405	0.163984	0.113419	0.126303	0.104748	0.170106	0.139636	0.323026	0.23078	2.78479	1.47757	0.166626	1	up	no
23425	u	chr13	.	178184782	178185864	MSTRG.9858.1	1	1083	MSTRG.9858	.	0.119316	0.095098	0.0001	0.063735	0.776236	1.62291	0.0001	0.851426	0.178337	2.18736	0.217863	-2.19851	0.167897	1	down	no
80438	u	chr8	.	74058897	74059792	MSTRG.32979.1	1	896	MSTRG.32979	.	1.71174	1.55346	0.210667	0.420331	0.441972	0.251499	0.279195	0.472761	0.13739	0.381133	2.85035	1.51114	0.168084	1	up	no
49032	u	chr3	.	6918335	6919259	MSTRG.20172.1	1	925	MSTRG.20172	.	0.436111	0.560404	0.955617	0.591854	4.31411	0.426048	0.142818	0.379476	0.649706	0.764101	2.90333	1.53771	0.168209	1	up	no
4834	j	chr1	+	166032824	166059021	MSTRG.2055.6	5	4623	MSTRG.2055	PIAS1	0.471362	0.674568	0.898209	1.95841	0.669054	0.593573	0.266521	0.343835	0.545354	0.267548	2.31631	1.21183	0.168263	1	up	no
63920	u	chr5	.	96045698	96048045	MSTRG.26146.1	1	2348	MSTRG.26146	.	0.633251	0.109335	0.272469	0.078393	0.459214	1.71898	0.213681	1.18332	0.461953	0.723713	0.360946	-1.47015	0.168453	1	down	no
27973	i	chr14	+	79892896	79896102	MSTRG.11703.1	1	3207	MSTRG.11703	KCNMA1	1.50341	0.911142	2.98688	1.22911	1.87145	0.461688	0.13731	0.660857	0.48308	1.81066	2.3925	1.25852	0.168938	1	up	no
9024	j	chr10	-	22624727	22677098	MSTRG.3891.4	4	5053	MSTRG.3891	ENSSSCG00000040123	3.62197	0.0001	0.0001	0.187505	0.318116	0.128375	0.429982	0.002634	0.0001	0.113524	6.11874	2.61324	0.168974	1	up	no
18735	i	chr13	-	32479936	32487001	MSTRG.7905.2	3	5002	MSTRG.7905	RBM6	0.652126	1.59548	0.533953	0.552832	1.60897	0.699456	3.05307	3.54597	0.455404	3.33239	0.445899	-1.16521	0.169235	1	down	no
56327	i	chr4	.	68891243	68891984	MSTRG.23215.1	1	742	MSTRG.23215	PDE7A	0.34809	0.594515	0.283491	0.410146	0.277341	0.575826	1.37761	0.422805	0.918348	2.01113	0.360665	-1.47127	0.169418	1	down	no
79253	o	chr8	+	31114815	31130117	MSTRG.32536.1	2	14665	MSTRG.32536	ENSSSCG00000036025	0.569575	3.19955	1.92086	2.62921	2.20815	1.13157	0.49236	0.613901	2.00481	1.33296	1.88811	0.916941	0.16965	1	up	no
15774	x	chr12	+	43714726	43793813	MSTRG.6632.2	3	4057	MSTRG.6632	NF1	0.009827	0.810494	0.0001	2.0915	0.012178	0.0001	0.0001	0.0001	0.334464	0.081045	7.03231	2.814	0.169815	1	up	no
77995	i	chr7	.	112979937	112986568	MSTRG.31981.1	1	6632	MSTRG.31981	ENSSSCG00000002440	0.192643	0.357016	0.351071	0.40342	0.351643	0.318977	1.21032	0.381542	0.198414	1.8068	0.422822	-1.24188	0.170548	1	down	no
39240	i	chr18	-	9974202	9982791	MSTRG.16397.1	2	8437	MSTRG.16397	HIPK2	1.73911	1.27772	0.0001	0.0001	0.0001	0.0001	0.0001	0.0001	0.0001	0.20539	14.6612	3.87393	0.170621	1	up	no
34542	i	chr16	-	22172044	22214119	MSTRG.14421.2	2	41088	MSTRG.14421	NIPBL	3.49874	1.47961	3.76455	2.66425	1.78653	1.48482	1.41147	1.70505	1.69621	1.36027	1.7229	0.78484	0.171116	1	up	no
37934	u	chr17	-	46580162	46583771	MSTRG.15966.1	1	3610	MSTRG.15966	.	1.24147	1.56546	0.685767	1.25815	1.40756	0.662535	0.134915	0.813389	1.3335	13.4781	0.374999	-1.41504	0.17113	1	down	no
35065	u	chr16	.	39322235	39329940	MSTRG.14683.1	1	7706	MSTRG.14683	.	0.501751	0.450114	0.914356	0.520071	0.279148	0.391025	2.23744	0.401242	0.367299	2.6518	0.440655	-1.18228	0.17132	1	down	no
33646	o	chr15	-	128190817	128285800	MSTRG.14068.6	4	30062	MSTRG.14068	IRS1	1.52805	1.98512	3.66255	5.94973	2.70754	2.50172	0.816736	3.36028	0.832259	1.09802	1.83912	0.879013	0.171414	1	up	no
13513	u	chr12	.	7698560	7704980	MSTRG.5808.1	1	6421	MSTRG.5808	.	0.911254	1.19115	1.10111	0.908779	1.4559	1.63079	2.27923	1.90377	3.31857	1.74368	0.511969	-0.965872	0.171557	1	down	no
16983	i	chr12	-	56955673	56966734	MSTRG.7140.2	2	8530	MSTRG.7140	MYOCD	0.286281	0.617956	0.593255	0.52438	0.45973	0.527283	0.121399	5.28817	0.286956	0.30485	0.380109	-1.39552	0.171837	1	down	no
7239	u	chr1	.	253670558	253674566	MSTRG.3118.1	1	4009	MSTRG.3118	.	0.062685	0.320329	0.299788	0.246701	0.388646	1.70718	0.010945	1.44688	0.458876	0.286552	0.337086	-1.56881	0.172076	1	down	no
21248	u	chr13	-	108199312	108213148	MSTRG.8956.1	2	12499	MSTRG.8956	.	0.740114	1.02283	1.27719	1.12444	1.11023	1.09355	3.75372	1.54091	0.42541	3.31194	0.520941	-0.940807	0.172203	1	down	no
8380	i	chr10	.	7988576	7993879	MSTRG.3579.1	1	5304	MSTRG.3579	SPATA17	0.601109	0.297136	0.375182	0.341678	0.531897	0.455898	1.13594	0.586475	0.588704	2.17513	0.434426	-1.20282	0.172618	1	down	no
52122	u	chr3	+	59498366	59539520	MSTRG.21463.2	2	1268	MSTRG.21463	.	0.951792	2.46006	1.58539	1.66301	1.61863	1.02107	0.019062	1.36637	0.0001	0.022294	3.40848	1.76913	0.172856	1	up	no
56215	i	chr4	+	65670547	65672632	MSTRG.23164.1	1	2086	MSTRG.23164	SULF1	1.82722	1.1987	2.19416	2.15559	4.58936	1.47885	0.867231	1.10769	0.971331	0.931317	2.23378	1.15948	0.172906	1	up	no
565	x	chr1	-	13887828	13934768	MSTRG.348.1	2	2115	MSTRG.348	ENSSSCG00000004081	1.26521	0.669971	0.60311	0.497247	0.317776	2.36453	1.7686	1.48648	1.57918	0.887167	0.414708	-1.26983	0.173567	1	down	no
31701	i	chr15	+	64867428	64878974	MSTRG.13326.3	2	10693	MSTRG.13326	ACVR1	0.594277	0.891753	3.58334	1.24605	1.68901	0.01933	0.000107	0.007474	1.91716	0.5597	3.19695	1.6767	0.17366	1	up	no
42069	i	chr2	-	9206281	9211064	MSTRG.17581.54	4	662	MSTRG.17581	ENSSSCG00000036669	0.0001	0.0001	1.1074	0.0001	0.0001	7.74338	0.0001	1.84191	0.007584	0.521618	0.109525	-3.19067	0.174033	1	down	no
80403	u	chr8	+	72867677	72882156	MSTRG.32964.1	1	14480	MSTRG.32964	.	1.67024	1.54501	1.25806	0.654507	2.8224	0.925005	0.120297	1.31344	0.938138	0.820384	1.93095	0.949308	0.174629	1	up	no
35611	u	chr16	.	56364327	56372648	MSTRG.14941.1	1	8322	MSTRG.14941	.	0.279437	0.172275	1.74162	0.751344	1.64786	0.613015	0.250593	0.251963	0.454333	0.411501	2.31782	1.21277	0.174926	1	up	no
1587	j	chr1	-	51398946	51428173	MSTRG.696.5	2	22104	MSTRG.696	ENSSSCG00000035593	0.671534	1.99523	1.00189	1.69228	0.970956	1.32011	3.04278	2.32552	1.58784	3.16967	0.5532	-0.854127	0.175073	1	down	no
73000	u	chr7	.	10785615	10796125	MSTRG.29966.1	1	10511	MSTRG.29966	.	0.080463	1.99814	0.181238	0.174372	0.225575	0.195877	0.158665	0.123609	0.309493	0.261156	2.53603	1.34257	0.175093	1	up	no
5802	o	chr1	-	201703342	201758892	MSTRG.2486.16	2	760	MSTRG.2486	ENSSSCG00000035294	2.18606	0.324281	5.39901	3.35453	3.56385	0.679799	2.62584	0.464873	0.897258	0.747887	2.73794	1.45309	0.1751	1	up	no
40762	i	chr18	+	54256837	54259856	MSTRG.17120.2	2	1067	MSTRG.17120	SUGCT	0.0001	0.02602	0.0001	0.014376	0.687618	0.0001	1.68525	0.007694	1.89836	0.705962	0.169456	-2.56102	0.175155	1	down	no
5163	u	chr1	+	180145500	180162849	MSTRG.2215.1	4	3326	MSTRG.2215	.	0.318428	0.344885	0.496791	0.867016	1.02706	0.263986	2.08381	1.16104	0.70695	3.03574	0.421178	-1.2475	0.175381	1	down	no
15053	i	chr12	+	31062364	31069924	MSTRG.6319.1	3	994	MSTRG.6319	ENSSSCG00000034257	4.27483	0.0001	0.0001	1.11539	0.0001	0.0001	0.425607	0.0001	0.0001	0.015162	12.2215	3.61135	0.175535	1	up	no
35063	u	chr16	+	39210214	39237869	MSTRG.14681.1	1	27656	MSTRG.14681	.	0.466216	0.54305	0.934687	0.354478	0.3401	0.42187	1.83976	0.277848	0.279466	2.53294	0.49301	-1.02031	0.175706	1	down	no
57909	j	chr4	+	98172135	98180578	MSTRG.23738.1	5	3189	MSTRG.23738	CDC42SE1	4.53854	7.44082	2.25997	8.26416	9.81007	1.17313	3.72234	7.28976	1.50286	2.45614	2.00156	1.00112	0.176323	1	up	no
77949	i	chr7	.	111878008	111879616	MSTRG.31960.1	1	1609	MSTRG.31960	KCNK13	0.081467	0.145296	0.11937	0.446738	0.28976	0.2495	0.606953	0.198887	0.154726	1.96337	0.341155	-1.5515	0.176551	1	down	no
55435	i	chr4	-	34669660	34679267	MSTRG.22834.1	1	9608	MSTRG.22834	UBR5	0.057628	0.258172	0.375852	1.31624	0.162818	2.38188	0.343148	0.342138	2.07791	0.352518	0.394847	-1.34063	0.176748	1	down	no
35618	u	chr16	.	56425949	56440589	MSTRG.14948.1	1	14641	MSTRG.14948	.	0.288392	0.181183	2.00156	0.866326	1.2189	0.554062	0.341745	0.262739	0.406423	0.552429	2.15187	1.10559	0.17696	1	up	no
15174	i	chr12	-	33702886	33705935	MSTRG.6404.1	1	3050	MSTRG.6404	MSI2	0.354869	1.06815	0.239955	1.56765	0.436481	0.298851	0.241887	0.353803	0.425136	0.183269	2.43995	1.28685	0.177047	1	up	no
5267	x	chr1	+	182546800	182565518	MSTRG.2259.1	2	2027	MSTRG.2259	FERMT2	0.327043	0.3386	0.603755	0.427433	0.574979	0.306824	0.251945	0.563127	0.425269	4.62253	0.368221	-1.44136	0.177954	1	down	no
74976	i	chr7	+	40758707	40761963	MSTRG.30738.1	1	3257	MSTRG.30738	CLIC5	0.503335	0.242291	0.315328	0.890394	0.242476	0.510296	3.46746	0.229597	0.274149	1.04817	0.396737	-1.33375	0.178087	1	down	no
24412	i	chr14	-	6198096	6202493	MSTRG.10261.2	2	2917	MSTRG.10261	XPO7	0.228871	2.3722	0.291095	0.120747	0.339059	0.236384	2.00091	3.26463	3.84246	0.302576	0.347464	-1.52506	0.178165	1	down	no
2052	j	chr1	-	75496982	75506489	MSTRG.903.3	2	6790	MSTRG.903	PPIL6	0.169218	0.0001	0.348646	0.38076	0.0001	0.197841	1.96751	0.0001	0.0001	3.32516	0.163699	-2.61088	0.179656	1	down	no
39896	u	chr18	.	26496605	26506922	MSTRG.16711.1	1	10318	MSTRG.16711	.	0.278738	0.26849	0.109022	0.240624	0.238407	0.16413	1.82336	0.232238	0.155307	0.322394	0.420875	-1.24854	0.180013	1	down	no
90522	u	chrY	+	7098733	7102487	MSTRG.37038.1	2	3651	MSTRG.37038	.	11.9952	0.842619	0.572185	0.954513	0.444233	0.803169	3.02926	0.59068	0.656143	0.610843	2.60254	1.37992	0.180331	1	up	no
10556	u	chr10	+	57451732	57470239	MSTRG.4576.2	3	15052	MSTRG.4576	.	2.92699	3.3768	1.45077	4.30191	1.96095	1.85204	1.07016	0.803121	3.3096	0.675417	1.818	0.862353	0.180909	1	up	no
45095	j	chr2	-	70192851	70199827	MSTRG.18536.3	5	1852	MSTRG.18536	ELOF1	0.0001	0.0001	1.38225	0.0001	1.47031	0.0001	5.60637	1.95254	5.54845	2.63	0.181278	-2.46372	0.180951	1	down	no
75318	i	chr7	-	49664922	49670611	MSTRG.30870.1	1	5690	MSTRG.30870	CEMIP	1.07851	0.298736	0.900461	3.85486	8.57479	2.04676	0.441952	2.23898	0.759765	0.979339	2.27429	1.18542	0.180964	1	up	no
35034	u	chr16	.	38722474	38726837	MSTRG.14653.1	1	4364	MSTRG.14653	.	0.24975	0.306837	0.57614	0.287358	0.198098	0.321614	1.33182	0.169194	0.270554	1.9014	0.405094	-1.30367	0.180964	1	down	no
48947	i	chr3	-	5912214	5912486	MSTRG.20143.1	1	273	MSTRG.20143	TRRAP	26.2837	8.2863	43.0773	47.6583	10.3459	79.5297	21.4915	65.979	44.5265	72.0911	0.47829	-1.06404	0.181273	1	down	no
73241	u	chr7	+	18233368	18235778	MSTRG.30123.1	1	2411	MSTRG.30123	.	0.250671	0.237402	1.95913	0.444054	0.169833	0.37861	0.109263	0.188733	0.196367	0.241922	2.74563	1.45714	0.181471	1	up	no
32609	j	chr15	+	94697205	94792038	MSTRG.13678.1	3	2247	MSTRG.13678	C2orf88	2.51941	2.14981	1.01862	2.34412	0.00433	2.7123	3.53527	7.8783	3.98978	3.03552	0.379945	-1.39614	0.181622	1	down	no
35036	u	chr16	.	38737472	38749810	MSTRG.14655.1	1	12339	MSTRG.14655	.	0.324041	0.383103	0.855639	0.342901	0.250903	0.374039	1.63545	0.236075	0.327257	2.09209	0.4623	-1.1131	0.182964	1	down	no
53167	i	chr3	-	94846477	94852054	MSTRG.21904.1	1	5578	MSTRG.21904	PRKCE	4.13889	9.35508	4.56586	4.9502	5.67383	4.26921	1.32682	5.19105	2.55695	2.97356	1.75785	0.813811	0.183219	1	up	no
9026	u	chr10	.	22651701	22654044	MSTRG.3897.1	1	2344	MSTRG.3897	.	3.24862	0.054826	0.0001	0.42006	0.0001	0.018454	0.307711	0.283628	0.055192	0.127818	4.69689	2.23171	0.183448	1	up	no
50057	i	chr3	+	19570061	19572458	MSTRG.20610.1	3	1584	MSTRG.20610	IL4R	1.27919	0.295082	1.38014	1.54423	2.14654	0.502675	0.826337	0.272695	0.370523	0.725336	2.4634	1.30065	0.1838	1	up	no
67412	i	chr6	.	56135191	56138639	MSTRG.27697.1	1	3449	MSTRG.27697	CACNG6	0.240086	0.689317	0.281164	0.106736	0.220749	0.313642	0.740973	0.245684	0.446524	2.20504	0.389197	-1.36143	0.184758	1	down	no
84790	i	chr9	+	56973698	57014328	MSTRG.34710.2	3	31839	MSTRG.34710	ZBTB44	1.12813	0.336829	0.879568	1.67132	1.5745	1.45202	0.929851	2.12628	3.55429	2.25928	0.541609	-0.884676	0.184962	1	down	no
12729	i	chr11	-	77067659	77084907	MSTRG.5500.2	1	17249	MSTRG.5500	COL4A2	6.25393	6.47485	2.39317	4.44827	8.36065	2.34947	2.39385	3.38867	1.82979	5.92501	1.75812	0.814034	0.184975	1	up	no
42080	i	chr2	-	9208247	9212168	MSTRG.17581.65	4	772	MSTRG.17581	ENSSSCG00000036669	6.80938	14.4146	12.7705	4.09804	0.441168	2.49059	1.92011	0.000725	2.07716	7.04622	2.847	1.50944	0.185164	1	up	no
87258	i	chrX	+	682761	684009	MSTRG.35694.1	2	1215	MSTRG.35694	ENSSSCG00000038963	24.7943	1.33738	1.02644	1.82438	2.12807	2.65214	4.97495	2.12147	1.51008	0.913901	2.5558	1.35377	0.185522	1	up	no
81793	x	chr8	-	130914424	130971472	MSTRG.33584.1	2	1465	MSTRG.33584	ABCG2	0.307072	0.176686	2.41115	1.09417	0.147213	0.273255	0.146577	0.51948	0.321502	0.184747	2.86137	1.51671	0.185757	1	up	no
47004	i	chr2	-	105180688	105199849	MSTRG.19250.2	3	18270	MSTRG.19250	CHD1	0.013493	1.69463	0.051352	0.007815	0.298589	0.046753	0.191373	0.269193	0.016051	0.139625	3.11598	1.63969	0.185838	1	up	no
22002	i	chr13	-	129586904	129610533	MSTRG.9288.1	2	19065	MSTRG.9288	FGF12	0.284273	2.54395	0.6062	0.303665	0.760348	2.54821	2.73335	0.526668	2.13498	1.17813	0.493178	-1.01982	0.186059	1	down	no
28345	i	chr14	-	91121134	91122550	MSTRG.11858.1	1	1417	MSTRG.11858	RASSF4	0.740265	0.459143	0.620579	0.484009	0.415312	0.828927	1.32009	2.25528	1.08555	1.03169	0.416973	-1.26197	0.186346	1	down	no
2958	x	chr1	+	109530771	109629042	MSTRG.1287.1	4	23274	MSTRG.1287	TLN2	0.253139	0.19761	0.093968	0.147757	0.096241	0.037629	0.086746	0.13419	0.021255	0.060705	2.31617	1.21174	0.186659	1	up	no
28448	i	chr14	+	98222393	98303305	MSTRG.11917.1	2	7602	MSTRG.11917	PRKG1	0.006586	0.001121	0.0001	0.838546	1.01433	0.0001	2.48673	0.0001	4.36618	3.69592	0.176384	-2.50321	0.187266	1	down	no
71963	i	chr6	.	158688214	158692908	MSTRG.29534.1	1	4695	MSTRG.29534	GLIS1	0.054352	0.090042	1.75922	0.220074	0.570392	0.030699	0.083482	0.492632	0.188553	0.147702	2.85672	1.51436	0.187296	1	up	no
79384	u	chr8	-	36959184	36969076	MSTRG.32576.1	1	9893	MSTRG.32576	.	0.21068	2.12053	0.004964	0.053326	0.85369	3.8833	0.007766	3.71384	1.16552	1.52486	0.315017	-1.6665	0.187524	1	down	no
45110	i	chr2	.	70388978	70390150	MSTRG.18543.1	1	1173	MSTRG.18543	ENSSSCG00000013717	2.00089	2.11375	1.86927	1.4042	2.59409	1.04669	0.850795	0.978024	0.842557	0.72256	2.24793	1.1686	0.187842	1	up	no
54921	o	chr4	-	12180366	12342557	MSTRG.22596.1	4	16936	MSTRG.22596	RF02167	0.97594	0.164853	0.177819	0.372021	0.241491	1.22992	0.143231	0.440902	1.25389	1.26539	0.445875	-1.16529	0.188415	1	down	no
51178	o	chr3	-	40959680	40992904	MSTRG.21075.10	5	2408	MSTRG.21075	RF00026	3.88121	2.60943	4.40623	1.52553	1.75444	0.905888	0.768069	2.71237	1.42922	0.940287	2.09846	1.06933	0.188416	1	up	no
48052	i	chr2	.	141349453	141350403	MSTRG.19719.1	1	951	MSTRG.19719	ENSSSCG00000014351	1.11214	0.197268	1.57084	1.20539	1.75738	0.477863	0.341536	0.477196	0.216919	0.72632	2.60869	1.38332	0.188602	1	up	no
80635	i	chr8	+	80320976	80353754	MSTRG.33062.1	2	31116	MSTRG.33062	NR3C2	0.104226	0.135073	0.182875	0.249879	0.123541	0.155879	0.598934	0.63431	0.160391	0.114664	0.47807	-1.06471	0.188698	1	down	no
3631	u	chr1	-	127382417	127394143	MSTRG.1565.1	2	9412	MSTRG.1565	.	0.823379	0.130503	0.360411	0.310164	0.146159	0.178458	0.91558	0.351453	0.124764	2.84248	0.401251	-1.31742	0.188745	1	down	no
62480	o	chr5	+	62009070	62018326	MSTRG.25558.3	2	5942	MSTRG.25558	CLEC2B	1.31679	1.19466	2.2712	1.5797	1.31623	1.10112	0.931237	0.702249	0.585027	0.503671	2.00836	1.00602	0.188869	1	up	no
27343	x	chr14	+	63484284	63551954	MSTRG.11432.1	2	3379	MSTRG.11432	ENSSSCG00000010212	0.0001	1.57793	1.75659	0.003285	0.004939	2.45974	1.89968	2.50541	2.69965	2.54622	0.276024	-1.85713	0.189255	1	down	no
15097	u	chr12	+	33183717	33187220	MSTRG.6369.1	1	3504	MSTRG.6369	.	6.29052	5.47171	4.68891	12.2721	0.065486	0.068458	0.996425	4.06842	5.66794	0.149911	2.62883	1.39442	0.189352	1	up	no
12005	x	chr11	-	24184803	24194673	MSTRG.5201.1	2	1013	MSTRG.5201	EPSTI1	1.04284	0.431406	0.313322	4.2354	0.954004	0.355281	0.461371	0.596509	0.635081	0.571293	2.66344	1.41329	0.189355	1	up	no
39136	i	chr18	+	8174044	8174490	MSTRG.16380.1	1	447	MSTRG.16380	WEE2	0.449064	0.928417	0.932203	0.578974	0.901521	2.56652	0.863563	1.27159	2.80046	2.3768	0.383663	-1.38209	0.189459	1	down	no
69247	u	chr6	-	81536692	81539134	MSTRG.28403.1	1	2443	MSTRG.28403	.	1.36095	0.0001	0.0001	0.0001	0.0001	0.0001	1.52012	2.22005	3.30015	3.05191	0.134889	-2.89015	0.189645	1	down	no
35783	u	chr16	+	67455086	67472131	MSTRG.15045.1	1	17046	MSTRG.15045	.	0.638236	2.07712	2.80794	1.26525	1.1505	0.734717	0.494552	1.03581	1.23086	0.945458	1.78751	0.837952	0.189889	1	up	no
202	i	chr1	.	5044603	5049947	MSTRG.73.1	1	5345	MSTRG.73	PACRG	0.220251	0.424707	0.334807	0.313627	0.193475	0.269975	0.748429	0.213437	0.492607	1.78976	0.423102	-1.24092	0.189975	1	down	no
73457	o	chr7	+	21600701	21626636	MSTRG.30231.1	2	271	MSTRG.30231	HIST1H2BN	48.5743	14.8261	8.02452	39.1462	57.3286	167.242	12.1204	104.355	70.9597	17.7622	0.450811	-1.14941	0.190148	1	down	no
5457	i	chr1	-	188413516	188415141	MSTRG.2332.1	1	1626	MSTRG.2332	DAAM1	1.25302	1.55627	0.0001	0.030496	2.0857	0.0001	0.054101	0.156772	0.85457	0.124256	4.13985	2.04958	0.190394	1	up	no
35803	u	chr16	-	67937662	67993283	MSTRG.15065.1	1	55622	MSTRG.15065	.	0.214095	1.23678	0.138425	0.427852	0.794152	1.48662	0.238	2.27154	0.489126	1.30377	0.485624	-1.04209	0.190621	1	down	no
56797	u	chr4	.	84701705	84703141	MSTRG.23408.1	1	1437	MSTRG.23408	.	0.189848	0.824956	0.500823	0.203659	0.629363	0.972658	2.3108	0.458757	0.395923	1.77969	0.396877	-1.33324	0.190896	1	down	no
75663	j	chr7	-	56179313	56311308	MSTRG.31013.1	10	1043	MSTRG.31013	NRG4	1.03625	0.618624	0.785975	0.591406	0.485969	1.09806	2.40462	0.761344	1.09899	3.04578	0.418399	-1.25705	0.191035	1	down	no
35812	u	chr16	.	68078692	68086515	MSTRG.15015.1	1	7824	MSTRG.15015	.	0.238953	0.885235	0.128128	0.455353	0.680848	1.68819	0.350409	1.81563	0.356834	1.23164	0.438847	-1.18821	0.191529	1	down	no
15177	i	chr12	-	33716879	33768962	MSTRG.6405.3	2	20603	MSTRG.6405	MSI2	1.37555	0.0001	0.0001	0.0001	0.0001	3.27414	0.820479	1.2304	1.53462	1.26743	0.169304	-2.56231	0.192468	1	down	no
87944	u	chrX	.	39385207	39389368	MSTRG.35994.1	1	4162	MSTRG.35994	.	0.15561	0.510898	0.330062	0.212971	0.94669	1.88215	0.051701	1.194	1.46325	0.874296	0.394524	-1.34181	0.19307	1	down	no
84456	i	chr9	-	50317535	50322297	MSTRG.34611.1	2	4675	MSTRG.34611	GRAMD1B	4.48042	1.38084	0.432776	0.943574	1.23891	0.482237	1.2355	0.917965	0.964037	0.250438	2.20159	1.13854	0.193291	1	up	no
59006	o	chr4	-	122245231	122255840	MSTRG.24219.1	2	8487	MSTRG.24219	ENSSSCG00000039854	24.6451	6.62456	1.66952	4.68708	4.78434	4.76878	5.12337	4.32324	6.67701	1.41423	1.90126	0.926953	0.193361	1	up	no
19519	i	chr13	-	47383805	47417446	MSTRG.8233.3	2	33199	MSTRG.8233	ENSSSCG00000036148	0.921544	2.47325	1.1467	2.40998	1.11288	4.45367	1.66972	3.62973	1.46289	3.18717	0.559902	-0.836755	0.193587	1	down	no
29232	o	chr14	-	113494944	113517748	MSTRG.12266.1	2	1533	MSTRG.12266	ACTR1A	0.878352	0.525274	1.80984	1.29707	1.81659	1.06443	0.180733	0.192025	0.99666	0.131272	2.4666	1.30252	0.194702	1	up	no
23286	u	chr13	-	164708499	164774363	MSTRG.9812.3	3	12981	MSTRG.9812	.	0.01955	0.889198	0.0001	0.020585	0.060441	0.17394	0.133192	1.60241	1.34763	0.267917	0.280808	-1.83234	0.19476	1	down	no
3629	u	chr1	-	127348272	127369735	MSTRG.1563.1	1	21464	MSTRG.1563	.	0.979606	0.218309	0.45195	0.393533	0.206695	0.234483	1.0465	0.267827	0.150776	3.30785	0.44935	-1.15409	0.195268	1	down	no
43063	u	chr2	.	28460872	28470053	MSTRG.17883.1	1	9182	MSTRG.17883	.	0.211755	0.198806	0.502195	0.427016	0.519521	0.251433	0.470316	0.269341	0.379603	2.87894	0.437518	-1.19258	0.195272	1	down	no
62388	x	chr5	+	60656776	60680425	MSTRG.25519.1	2	2619	MSTRG.25519	ETV6	9.23776	2.66535	4.16115	5.22555	6.4775	3.76768	1.7596	1.29978	0.0001	4.10325	2.54037	1.34504	0.195337	1	up	no
31244	i	chr15	-	48069639	48075102	MSTRG.13124.2	1	5464	MSTRG.13124	FGFR1	4.02442	2.32713	3.42244	3.53763	2.15494	0.21635	1.15158	1.89263	2.4431	2.26865	1.94003	0.956081	0.196429	1	up	no
71832	i	chr6	+	155818826	155831587	MSTRG.29418.5	2	10755	MSTRG.29418	ENSSSCG00000003839	0.0001	0.0001	0.0001	0.513025	0.0001	0.0001	2.93273	0.0001	1.03448	0.680998	0.110452	-3.17851	0.196777	1	down	no
23944	u	chr13	.	201162082	201162900	MSTRG.10055.1	1	819	MSTRG.10055	.	0.560079	0.653801	0.479232	0.420399	0.543916	1.4586	1.81855	1.18499	1.04281	0.968102	0.410536	-1.28442	0.196967	1	down	no
47176	i	chr2	-	116446251	116480590	MSTRG.19332.5	3	30339	MSTRG.19332	MCC	1.58756	2.10919	3.93042	1.05708	3.12684	1.00016	1.30028	2.74035	0.824494	0.810672	1.7692	0.823095	0.197259	1	up	no
78011	u	chr7	.	113294490	113298156	MSTRG.31989.1	1	3667	MSTRG.31989	.	0.0001	0.011682	0.0001	0.296632	0.0001	0.0001	2.32851	0.013433	0.0001	0.129632	0.124855	-3.00167	0.197323	1	down	no
24638	u	chr14	.	11015100	11016056	MSTRG.10363.1	1	957	MSTRG.10363	.	0.426634	0.435554	1.25185	1.26195	0.843529	1.76717	1.98562	1.48485	1.51035	2.96589	0.43438	-1.20297	0.197378	1	down	no
24450	x	chr14	-	6538928	6645702	MSTRG.10278.1	2	297	MSTRG.10278	PIWIL2	5.83426	3.75055	3.24341	1.06433	4.04703	1.98002	0.908072	1.19628	2.14655	1.0425	2.46646	1.30244	0.197447	1	up	no
60317	u	chr5	.	14563844	14565268	MSTRG.24757.1	1	1425	MSTRG.24757	.	0.836369	0.605698	0.642268	0.30002	1.75946	0.202169	0.0001	0.727395	0.30788	0.16413	2.95633	1.56381	0.197524	1	up	no
56595	i	chr4	+	79943559	79944978	MSTRG.23327.1	1	1420	MSTRG.23327	SPIDR	1.40661	0.722187	2.42937	1.25349	2.62365	0.571678	0.471871	0.807578	0.905893	0.966019	2.2657	1.17996	0.197768	1	up	no
81552	i	chr8	-	121665566	121670005	MSTRG.33467.4	2	2843	MSTRG.33467	TSPAN5	0.825278	0.0001	0.542716	0.0001	0.002256	0.1151	1.06536	2.46084	1.27609	0.733988	0.242498	-2.04395	0.198018	1	down	no
39893	u	chr18	.	26410949	26430198	MSTRG.16697.1	1	19250	MSTRG.16697	.	0.412439	0.303619	0.077766	0.231409	0.240914	0.146709	1.84327	0.239876	0.197692	0.331407	0.458924	-1.12367	0.198036	1	down	no
64671	o	chr6	-	12498082	12617267	MSTRG.26584.1	4	6518	MSTRG.26584	ZNRF1	0.266066	2.27288	0.220195	2.01838	2.0058	0.341491	1.57735	0.320937	0.385882	0.131901	2.4599	1.2986	0.198343	1	up	no
37726	j	chr17	+	40420786	40449662	MSTRG.15832.1	3	1190	MSTRG.15832	ENSSSCG00000025673	2.37144	9.07219	8.44103	7.22924	5.96763	6.15979	1.69049	3.701	0.8709	0.0001	2.66308	1.4131	0.198679	1	up	no
42014	i	chr2	-	9199696	9212216	MSTRG.17581.7	5	1628	MSTRG.17581	ENSSSCG00000036669	0.0001	0.0001	3.67897	2.74092	1.15306	0.0001	0.0001	0.14182	0.0001	0.93679	7.01926	2.81132	0.198722	1	up	no
9025	j	chr10	-	22624727	22677098	MSTRG.3891.5	5	4961	MSTRG.3891	ENSSSCG00000040123	2.36291	0.0001	0.0001	0.596173	0.040946	0.334244	0.0001	0.0001	0.0001	0.0001	8.96543	3.16437	0.199187	1	up	no
86263	u	chr9	.	111381050	111384418	MSTRG.35279.1	1	3369	MSTRG.35279	.	0.404274	0.237889	1.17684	0.194032	1.74343	0.457757	0.186189	0.475918	0.230175	0.206422	2.41347	1.27111	0.1998	1	up	no
62160	i	chr5	+	52627338	52679609	MSTRG.25424.1	2	51650	MSTRG.25424	PDE3A	2.56873	1.84144	4.66912	3.03821	3.71056	1.55169	1.11652	1.8236	2.28126	2.6971	1.67136	0.741022	0.199823	1	up	no
79913	i	chr8	+	55680229	55692960	MSTRG.32788.1	1	12732	MSTRG.32788	PPAT	1.14127	0.561373	1.12637	1.744	0.893179	2.95259	2.21302	2.90405	1.34872	0.626843	0.544157	-0.877904	0.200095	1	down	no
50553	i	chr3	+	32527782	32528618	MSTRG.20854.1	1	837	MSTRG.20854	ATF7IP2	0.312659	1.00634	0.405473	0.520729	0.421203	1.29241	0.460813	3.74608	0.894686	0.676371	0.377125	-1.40689	0.200256	1	down	no
68526	u	chr6	+	69614860	69624620	MSTRG.28109.1	1	9761	MSTRG.28109	.	1.29278	0.43377	1.02893	1.79918	0.759373	1.75162	2.17572	1.38407	2.59642	1.87456	0.543223	-0.880383	0.200368	1	down	no
73001	u	chr7	+	10867700	10868341	MSTRG.29967.1	1	642	MSTRG.29967	.	1175.73	56.7377	41.5291	35.158	67.8588	2352.95	826.737	163.169	109.9	171.186	0.379976	-1.39602	0.200985	1	down	no
31871	i	chr15	-	68016064	68029027	MSTRG.13361.1	2	12483	MSTRG.13361	TANK	0.503827	0.026153	0.050963	0.015963	0.0001	0.033223	0.072334	0.0001	0.0001	0.014428	4.96739	2.31249	0.201514	1	up	no
4980	j	chr1	-	169710954	169722747	MSTRG.2137.2	5	2596	MSTRG.2137	TRAPPC6B	0.084826	0.367362	0.17276	0.139055	1.3316	0.040898	0.206918	0.081462	0.108157	0.285539	2.89859	1.53535	0.201615	1	up	no
8608	i	chr10	+	13507229	13510587	MSTRG.3704.1	2	2155	MSTRG.3704	ENSSSCG00000010850	0.0001	1.00293	0.0001	1.42884	0.0001	1.70953	3.05486	1.41257	1.3586	2.3031	0.247196	-2.01627	0.201927	1	down	no
28457	i	chr14	-	98484195	98495990	MSTRG.11924.1	2	11772	MSTRG.11924	PRKG1	0.041189	0.0001	0.056422	0.055545	0.00469	0.146769	0.054691	0.111281	0.118915	0.056913	0.323283	-1.62913	0.202076	1	down	no
56218	i	chr4	+	65729128	65740713	MSTRG.23167.1	2	11032	MSTRG.23167	SULF1	2.49129	1.24563	2.94041	4.08807	6.2873	2.25386	1.64423	2.34105	1.72032	1.79416	1.74835	0.805992	0.202594	1	up	no
5124	o	chr1	-	179671803	179686694	MSTRG.2202.4	2	400	MSTRG.2202	RF00017	0.0001	0.0001	0.0001	9217.85	0.0001	226.636	0.0001	0.0001	0.0001	0.0001	40.6724	5.34598	0.202758	1	up	no
40738	u	chr18	+	53563054	53580935	MSTRG.17107.2	2	17099	MSTRG.17107	.	0.008351	0.076468	0.031609	0.697747	0.013119	0.0001	0.007343	0.030258	0.183444	0.005958	3.64281	1.86505	0.203042	1	up	no
58295	i	chr4	.	103511262	103512311	MSTRG.23905.1	1	1050	MSTRG.23905	VTCN1	1.19269	0.408116	0.454233	1.82232	0.857158	0.429225	0.244939	0.515383	0.481918	0.239083	2.47809	1.30923	0.203682	1	up	no
24639	u	chr14	.	11022372	11022897	MSTRG.10364.1	1	526	MSTRG.10364	.	0.605164	0.354347	1.07557	0.452929	0.635095	1.99383	1.24122	2.07355	1.20447	1.32501	0.398454	-1.32752	0.203755	1	down	no
16263	i	chr12	-	48654931	48668979	MSTRG.6851.1	1	14049	MSTRG.6851	PAFAH1B1	4.70314	5.33705	0.0001	1.08166	0.0001	0.0001	0.0001	1.22279	0.0001	0.0001	9.09269	3.18471	0.203776	1	up	no
85021	i	chr9	+	66419727	66425782	MSTRG.34779.3	2	3211	MSTRG.34779	NUCKS1	0.006816	0.101437	0.433637	0.06356	0.005334	0.162354	1.77585	0.037011	0.007625	0.097301	0.293627	-1.76795	0.203788	1	down	no
5783	o	chr1	-	201664987	201731978	MSTRG.2486.6	8	4929	MSTRG.2486	ENSSSCG00000035294	0.33526	0.359143	0.561074	0.836521	0.551326	3.19059	2.15498	0.477986	0.498895	0.043585	0.415223	-1.26804	0.204002	1	down	no
52199	u	chr3	+	63855633	63950306	MSTRG.21503.3	2	33759	MSTRG.21503	.	0.532996	3.26926	0.012771	0.126022	1.42241	4.10775	0.86915	2.6049	3.01327	2.06068	0.423796	-1.23856	0.2053	1	down	no
52139	u	chr3	-	59659338	59697886	MSTRG.21471.2	2	5916	MSTRG.21471	.	0.0001	3.5679	0.003673	0.011809	0.024398	0.008643	0.000298	0.540599	0.0001	0.0001	6.56289	2.71433	0.205381	1	up	no
210	i	chr1	-	5149535	5150324	MSTRG.81.1	1	790	MSTRG.81	PACRG	0.275494	0.48917	0.367438	0.226798	0.199114	0.0001	1.54672	0.466987	0.429726	2.36827	0.32379	-1.62687	0.205555	1	down	no
19468	u	chr13	-	46344563	46428569	MSTRG.8212.1	2	83972	MSTRG.8212	.	1.24904	0.965098	5.90428	2.12229	0.764369	1.14199	1.15126	1.34853	0.971689	1.50973	1.79727	0.845811	0.205593	1	up	no
61469	u	chr5	+	31324704	31329933	MSTRG.25175.2	2	2022	MSTRG.25175	.	1.53022	3.103	1.39454	1.10464	2.36233	1.05263	0.0001	0.796306	1.46311	0.013329	2.85515	1.51357	0.205926	1	up	no
84404	o	chr9	-	49098698	49116403	MSTRG.34567.5	3	8330	MSTRG.34567	ssc-mir-125b-1	0.69583	0.0001	0.0001	0.843312	4.7e-05	0.0001	0.0001	0.0001	0.166137	0.0001	9.24353	3.20844	0.205939	1	up	no
38240	j	chr17	-	51626192	51664512	MSTRG.16077.1	5	2490	MSTRG.16077	UBE2V1	4.67852	0.202452	3.99871	1.67068	2.53608	1.79174	1.38109	0.0001	1.2155	0.154362	2.8807	1.52642	0.206101	1	up	no
39902	i	chr18	.	26560466	26570101	MSTRG.16717.1	1	9636	MSTRG.16717	KCND2	0.475984	0.319888	0.165222	0.21686	0.240925	0.159937	2.24177	0.294773	0.192103	0.320814	0.442101	-1.17755	0.206471	1	down	no
87246	u	chrX	-	575724	589646	MSTRG.35711.3	4	12399	MSTRG.35711	.	6.58101	0.568952	0.464771	0.730115	0.318472	0.58381	2.20781	0.357324	0.329378	0.277265	2.30678	1.20588	0.206818	1	up	no
70694	j	chr6	+	108166914	108214331	MSTRG.28964.4	3	8311	MSTRG.28964	CABLES1	0.383366	0.840602	0.323386	1.02807	0.85771	2.09201	0.426778	2.01881	0.897494	1.53298	0.492695	-1.02123	0.206847	1	down	no
24901	u	chr14	.	17973914	17983062	MSTRG.10481.1	1	9149	MSTRG.10481	.	0.656733	0.454982	2.00824	0.650218	0.49378	0.525647	0.546053	0.118221	0.501852	0.309208	2.13093	1.09149	0.206867	1	up	no
35623	u	chr16	.	56483444	56510089	MSTRG.14953.1	1	26646	MSTRG.14953	.	0.280845	0.18266	1.83462	0.83764	1.48083	0.610124	0.31971	0.33553	0.487594	0.659163	1.91391	0.936527	0.207153	1	up	no
23580	i	chr13	+	190026290	190032662	MSTRG.9931.2	2	3840	MSTRG.9931	CYYR1	0.148433	0.267133	0.365445	0.440088	0.340125	0.278703	0.878427	0.841023	0.218966	1.33417	0.439621	-1.18567	0.207371	1	down	no
74188	i	chr7	+	28963901	28966600	MSTRG.30437.1	2	2478	MSTRG.30437	DST	0.452148	0.600217	1.36714	2.14523	0.260521	0.480693	0.374128	0.423668	0.448891	0.363135	2.30817	1.20675	0.20744	1	up	no
11393	i	chr11	.	8791892	8792731	MSTRG.4898.1	1	840	MSTRG.4898	ZAR1L	0.179317	0.674527	0.168534	0.316062	0.698082	2.44452	0.0001	1.65798	1.97122	0.483513	0.310572	-1.687	0.207537	1	down	no
73157	u	chr7	+	16790286	16833871	MSTRG.30039.1	3	31254	MSTRG.30039	.	1.22749	1.33693	6.03842	1.92414	1.42095	1.17475	0.729089	1.80022	1.67618	1.43102	1.75415	0.81077	0.207748	1	up	no
58279	u	chr4	+	103408361	103428984	MSTRG.23889.2	2	20536	MSTRG.23889	.	1.87423	0.450849	0.0001	0.513247	0.465135	0.0001	0.192596	0.234838	0.295863	0.31142	3.19241	1.67465	0.207905	1	up	no
78017	u	chr7	+	113323390	113328261	MSTRG.31995.1	2	4538	MSTRG.31995	.	0.00964	0.0001	0.0001	0.453892	0.0001	0.0001	3.61006	0.0001	0.009402	0.051874	0.126332	-2.98471	0.208028	1	down	no
30812	i	chr15	+	30510878	30528993	MSTRG.12947.1	2	17728	MSTRG.12947	GLI2	1.09973	1.06615	2.59568	2.3881	0.482629	0.093829	0.544096	0.881543	1.99236	0.375821	1.96321	0.973216	0.208243	1	up	no
64036	x	chr5	-	101614553	101712113	MSTRG.26202.1	2	5747	MSTRG.26202	PAWR	3.33644	5.66825	8.84539	7.16907	5.54219	5.74546	3.24195	0.625279	5.56049	0.223979	1.98487	0.989044	0.208525	1	up	no
86260	u	chr9	.	111338483	111341359	MSTRG.35276.1	1	2877	MSTRG.35276	.	0.218102	0.261041	1.67092	0.16783	1.44799	0.40191	0.174771	0.599321	0.166581	0.183323	2.46796	1.30332	0.20854	1	up	no
65535	i	chr6	.	32505668	32507851	MSTRG.26940.1	1	2184	MSTRG.26940	TOX3	0.073159	0.569015	0.335106	0.217871	0.083384	0.258339	0.624116	0.306166	0.283715	1.91102	0.377889	-1.40396	0.208564	1	down	no
203	i	chr1	.	5071597	5074496	MSTRG.74.1	1	2900	MSTRG.74	PACRG	0.369839	0.331309	0.283653	0.256585	0.11592	0.328269	0.637862	0.163715	0.361367	1.79786	0.412671	-1.27693	0.208688	1	down	no
81551	i	chr8	-	121665520	121668301	MSTRG.33467.3	3	1120	MSTRG.33467	TSPAN5	0.0001	2.24372	2.72617	0.905452	0.0001	0.115985	0.0001	0.783452	0.0001	0.0001	6.53029	2.70715	0.208897	1	up	no
87242	u	chrX	+	524616	618255	MSTRG.35709.1	2	1586	MSTRG.35709	.	7.40321	0.77036	0.607689	1.36648	0.485998	0.559219	2.05102	0.492115	0.563011	0.547838	2.52391	1.33566	0.209046	1	up	no
35774	o	chr16	-	66969291	67062927	MSTRG.15036.1	2	2284	MSTRG.15036	ENSSSCG00000039000	0.195601	1.16028	1.81526	0.85066	0.800521	0.308857	0.354206	0.561144	0.504892	0.381034	2.28532	1.19239	0.209889	1	up	no
59482	i	chr5	+	345372	360853	MSTRG.24434.1	2	8648	MSTRG.24434	PPP6R2	0.998543	0.015115	0.28388	0.832831	0.465328	0.973882	0.855053	0.866409	1.6471	1.49502	0.444661	-1.16922	0.210161	1	down	no
21237	i	chr13	.	107882464	107884356	MSTRG.8948.1	1	1893	MSTRG.8948	MECOM	0.150126	0.436454	0.410629	0.591598	0.515621	0.679469	1.82147	0.545718	0.142984	1.79493	0.422189	-1.24404	0.210316	1	down	no
17866	i	chr13	.	21063949	21065182	MSTRG.7558.1	1	1234	MSTRG.7558	ARPP21	0.0709	0.783157	0.019897	0.298985	0.331295	2.19439	0.0001	1.80269	0.571036	0.637113	0.288979	-1.79096	0.210486	1	down	no
51180	o	chr3	-	40960738	40985125	MSTRG.21075.12	4	3792	MSTRG.21075	RF00026	0.0001	6.56066	11.1855	9.39033	5.14961	0.0001	4.37262	0.0001	0.0001	0.0001	7.38305	2.88422	0.210529	1	up	no
86272	u	chr9	.	111560620	111570931	MSTRG.35288.1	1	10312	MSTRG.35288	.	0.582629	0.261074	2.09432	0.217416	2.10491	0.489046	0.24362	0.956748	0.379869	0.41803	2.11487	1.08057	0.210595	1	up	no
70743	o	chr6	+	109173839	109192008	MSTRG.28997.1	2	15146	MSTRG.28997	ENSSSCG00000030248	0.359378	0.007041	0.371033	1.24758	1.00033	0.260749	0.012536	0.366549	0.411647	0.163473	2.45718	1.297	0.210796	1	up	no
29959	i	chr14	+	134384278	134438500	MSTRG.12526.1	2	12482	MSTRG.12526	CTBP2	0.125174	1.4253	2.48029	1.54479	1.38171	0.241206	0.112966	1.70276	1.04413	0.139616	2.14685	1.10222	0.211395	1	up	no
36801	i	chr17	+	26600129	26603594	MSTRG.15467.1	1	3466	MSTRG.15467	ZNF133	2.05883	1.84122	2.05943	1.65448	2.1431	6.40702	1.46193	7.49366	2.39502	1.62701	0.503339	-0.990398	0.211644	1	down	no
78619	u	chr8	.	2646341	2646883	MSTRG.32226.1	1	543	MSTRG.32226	.	1.49554	1.80075	2.7165	4.32378	2.86193	0.133819	0.966832	0.76884	2.96604	0.076028	2.68723	1.42612	0.211833	1	up	no
51167	x	chr3	-	40927293	40950620	MSTRG.21075.2	6	4438	MSTRG.21075	LMF1	0.347721	0.228041	1.06694	3.27319	0.497144	0.534974	0.479247	0.300329	0.65817	0.377836	2.30288	1.20344	0.212986	1	up	no
52622	u	chr3	.	75369848	75371628	MSTRG.21673.1	1	1781	MSTRG.21673	.	0.145021	0.257751	0.343764	0.051675	0.112541	0.0001	1.6536	0.0001	0.024213	2.00069	0.247574	-2.01407	0.213133	1	down	no
37825	u	chr17	.	42117647	42120696	MSTRG.15918.1	1	3050	MSTRG.15918	.	0.381099	0.73193	1.76591	1.5052	0.209911	0.590392	0.13716	0.808386	0.315618	0.096042	2.35883	1.23807	0.213307	1	up	no
61943	i	chr5	-	46132464	46142489	MSTRG.25336.2	2	9974	MSTRG.25336	PPFIBP1	0.646876	0.29896	0.0001	0.0001	2.08587	0.0001	0.0001	0.33439	0.132811	0.0001	6.48534	2.69718	0.213716	1	up	no
42796	i	chr2	+	21486982	21542537	MSTRG.17737.2	2	4075	MSTRG.17737	LRRC4C	0.215763	0.233251	0.399425	0.25372	0.13185	0.230261	2.20631	0.159035	0.312824	0.08429	0.412337	-1.2781	0.213779	1	down	no
70162	i	chr6	.	95333632	95334805	MSTRG.28719.1	1	1174	MSTRG.28719	ENSSSCG00000032082	1.5494	0.83845	1.86056	1.40773	1.48601	0.406754	0.319358	0.783223	1.13258	0.541169	2.24378	1.16593	0.213976	1	up	no
31139	i	chr15	+	46541092	46546268	MSTRG.13090.1	1	5177	MSTRG.13090	PDLIM3	0.231953	0.808171	1.13203	0.756415	0.565463	0.721577	1.66596	1.13957	0.331303	3.54452	0.47198	-1.0832	0.214201	1	down	no
36270	i	chr17	+	5500544	5501975	MSTRG.15248.1	1	1432	MSTRG.15248	MTUS1	0.512064	0.366183	0.611403	0.728379	0.515938	0.808424	2.12542	0.803616	0.3697	2.12634	0.438593	-1.18905	0.214241	1	down	no
24903	u	chr14	+	17993379	18000744	MSTRG.10483.1	2	6786	MSTRG.10483	.	0.770256	0.304144	1.88932	0.602834	0.545071	0.53018	0.50289	0.114084	0.420183	0.318176	2.18064	1.12475	0.214536	1	up	no
71468	i	chr6	-	146203331	146210628	MSTRG.29297.1	1	7298	MSTRG.29297	PDE4B	2.12467	3.0171	2.44704	4.36956	3.78994	1.82235	2.01491	2.23266	1.4531	1.68742	1.70983	0.773855	0.214951	1	up	no
36535	o	chr17	-	13923267	13972084	MSTRG.15346.3	2	7756	MSTRG.15346	SLC23A2	0.703039	1.52233	0.0001	0.360949	0.905337	0.788244	7.5e-05	0.0001	0.004757	0.074519	4.02417	2.00869	0.215438	1	up	no
45093	j	chr2	-	70192588	70199864	MSTRG.18536.1	5	2133	MSTRG.18536	ELOF1	1.75506	2.45595	0.756194	1.44757	0.818902	1.89675	0.399842	0.465644	0.124106	0.257218	2.30111	1.20233	0.215916	1	up	no
46467	i	chr2	-	85381457	85392983	MSTRG.19032.1	2	6316	MSTRG.19032	IQGAP2	7.08594	1.86264	1.29097	1.13657	0.610855	1.17267	1.80763	1.34133	0.996056	0.784469	1.96438	0.974077	0.216085	1	up	no
13886	x	chr12	+	16203560	16225131	MSTRG.5955.1	2	2506	MSTRG.5955	TLK2	2.26452	0.657141	0.386551	0.479443	2.74619	0.0001	0.708737	0.627378	0.541141	0.494828	2.75436	1.46172	0.216167	1	up	no
31069	i	chr15	+	45103805	45111908	MSTRG.13059.1	1	8104	MSTRG.13059	STOX2	0.831576	0.797498	1.60968	1.90702	1.40476	1.25864	3.712	1.46068	0.573792	5.20401	0.536528	-0.898275	0.216796	1	down	no
35802	u	chr16	.	67919872	67936818	MSTRG.15064.1	1	16947	MSTRG.15064	.	0.232481	1.1247	0.154053	0.433458	0.77186	1.42773	0.266274	2.14605	0.403051	1.31886	0.488416	-1.03382	0.217221	1	down	no
60210	i	chr5	+	11722974	11732031	MSTRG.24715.2	2	8455	MSTRG.24715	RBFOX2	1.22295	1.93755	0.874617	0.0001	0.873554	0.0001	0.717615	0.0001	0.0001	0.0001	6.83658	2.77328	0.21747	1	up	no
69203	i	chr6	-	81029768	81036105	MSTRG.28381.3	2	4117	MSTRG.28381	LUZP1	0.92757	1.73466	0.0001	1.01849	0.0001	0.0001	0.0001	0.0001	0.0001	0.468203	7.85511	2.97363	0.217916	1	up	no
39938	i	chr18	-	28984098	28987696	MSTRG.16734.1	1	3599	MSTRG.16734	WNT2	0.854761	0.412197	1.94157	0.849536	1.83108	0.528503	0.245751	0.795393	0.514763	0.677992	2.13189	1.09213	0.21806	1	up	no
9702	i	chr10	+	38580728	38592936	MSTRG.4184.1	2	7682	MSTRG.4184	MOB3B	0.883379	1.41263	3.23465	2.01295	2.34759	1.13248	0.736872	1.5166	0.936935	1.12024	1.81719	0.861709	0.218339	1	up	no
35039	u	chr16	+	38770983	38785913	MSTRG.14658.1	1	14931	MSTRG.14658	.	0.381355	0.439547	1.02336	0.395529	0.240809	0.493958	1.72318	0.225081	0.291922	2.24374	0.498325	-1.00484	0.21866	1	down	no
86087	i	chr9	+	105611073	105614785	MSTRG.35216.1	1	3713	MSTRG.35216	ATXN7L1	0.0001	0.632417	0.437457	0.063073	0.050226	0.144389	0.142703	0.044975	1.0381	2.56624	0.300597	-1.7341	0.218793	1	down	no
79378	u	chr8	.	36862156	36862823	MSTRG.32573.1	1	668	MSTRG.32573	.	0.065951	0.545537	0.0001	0.0001	0.137403	1.77884	0.0001	1.44397	0.096834	0.123829	0.217533	-2.20069	0.218963	1	down	no
86281	i	chr9	+	111654598	111703218	MSTRG.35295.2	2	2308	MSTRG.35295	ENSSSCG00000035172	0.436251	0.363233	1.95897	0.364923	2.67616	0.693176	0.262446	0.653382	0.442131	0.450024	2.31874	1.21334	0.219164	1	up	no
21027	i	chr13	-	96040032	96040551	MSTRG.8869.1	1	520	MSTRG.8869	KCNAB1	2.01006	0.327763	0.59037	1.63053	0.785876	0.847306	0.331227	0.320131	0.195268	0.394033	2.55972	1.35599	0.219802	1	up	no
79135	i	chr8	-	28966477	28974822	MSTRG.32484.1	2	5675	MSTRG.32484	NWD2	0.805174	5.46395	1.12088	1.13392	1.50255	1.14263	0.344521	1.06031	1.74189	0.854628	1.94917	0.962858	0.220003	1	up	no
19043	o	chr13	+	35542798	35647559	MSTRG.7994.1	3	7911	MSTRG.7994	CACNA1D	0.250752	0.001063	0.478858	0.00957	0.0001	0.664555	0.297255	0.74551	0.424444	0.295308	0.305035	-1.71295	0.220017	1	down	no
24383	u	chr14	.	3861725	3862763	MSTRG.10246.1	1	1039	MSTRG.10246	.	0.980467	0.782768	1.8298	0.757313	0.524266	0.56706	0.363558	0.187455	0.565173	0.380826	2.36165	1.23979	0.2206	1	up	no
34673	i	chr16	.	26318590	26319199	MSTRG.14474.1	1	610	MSTRG.14474	PLCXD3	2.18472	2.0649	1.9614	1.56973	2.47847	1.41628	0.426224	0.79006	0.935071	0.964645	2.26359	1.17861	0.221063	1	up	no
66090	o	chr6	+	45535317	45583817	MSTRG.27201.1	2	5183	MSTRG.27201	ZNF146	4.14717	3.60562	3.5228	3.50203	4.47221	1.82173	3.36002	2.12794	1.60553	2.1868	1.7339	0.794023	0.221329	1	up	no
21241	i	chr13	.	107931374	107940432	MSTRG.8951.1	1	9059	MSTRG.8951	MECOM	0.375732	0.574818	0.869136	0.650049	0.672862	0.690217	2.2606	0.884187	0.322451	1.88591	0.520007	-0.943396	0.221539	1	down	no
7115	i	chr1	+	251454280	251454576	MSTRG.3059.1	1	297	MSTRG.3059	SVEP1	5.80857	3.88507	4.06833	5.08986	11.3144	2.95951	1.26185	2.62428	3.32769	3.58947	2.19187	1.13216	0.221639	1	up	no
56177	i	chr4	-	64962195	64989677	MSTRG.23148.2	2	27084	MSTRG.23148	NCOA2	1.07264	0.0001	0.0001	0.0001	0.63435	1.89358	0.617121	0.485459	2.1254	1.79987	0.246667	-2.01936	0.221716	1	down	no
36802	i	chr17	+	26604198	26607039	MSTRG.15468.1	1	2842	MSTRG.15468	ZNF133	1.50534	1.5152	1.61088	1.39781	1.33926	5.26992	1.23066	5.81784	1.58301	1.26179	0.485945	-1.04114	0.222272	1	down	no
21238	i	chr13	.	107895516	107896447	MSTRG.8949.1	1	932	MSTRG.8949	MECOM	0.271136	0.507054	0.524821	0.734654	0.403672	0.611433	1.95042	0.637049	0.381645	2.23576	0.41974	-1.25243	0.222592	1	down	no
23472	o	chr13	+	181186009	181375408	MSTRG.9891.5	4	30339	MSTRG.9891	ssc-let-7c	0.357221	0.437416	1.02013	0.538421	1.045	0.691909	0.469931	0.294038	0.234014	0.178409	1.81886	0.863037	0.222715	1	up	no
5204	j	chr1	+	181516118	181651973	MSTRG.2230.1	4	3678	MSTRG.2230	GNG2	26.4219	3.49512	4.56357	10.0126	3.40198	3.58789	7.34738	2.37653	2.49736	9.44066	1.89685	0.923605	0.223439	1	up	no
24904	u	chr14	.	18000828	18007181	MSTRG.10484.1	1	6354	MSTRG.10484	.	0.585954	0.454039	2.02377	0.645598	0.521734	0.566037	0.492104	0.07725	0.490626	0.319077	2.17527	1.12119	0.223908	1	up	no
87117	u	chr9	+	135079167	135083826	MSTRG.35670.1	2	2926	MSTRG.35670	.	0.65104	0.877926	1.65886	1.38584	0.611922	0.418386	0.847067	0.509308	0.096284	0.417461	2.26593	1.1801	0.224051	1	up	no
71779	o	chr6	+	154902729	154986086	MSTRG.29441.1	2	20849	MSTRG.29441	DAB1	2.76692	6.02546	1.392	0.99048	2.44284	1.33618	1.17747	1.32851	3.09418	0.979301	1.72035	0.782703	0.224233	1	up	no
80644	i	chr8	+	80771769	80773656	MSTRG.33068.1	1	1888	MSTRG.33068	ARHGAP10	0.0001	0.156486	0.82261	4.45034	0.0001	0.0001	0.128061	0.559779	0.323008	0.0001	5.3703	2.425	0.22433	1	up	no
20082	i	chr13	.	68477867	68478350	MSTRG.8454.1	1	484	MSTRG.8454	TSEN2	1192.41	59.3751	43.1754	33.4921	68.4701	2169.34	715.426	197.897	140.663	209.599	0.406918	-1.29719	0.224351	1	down	no
24915	u	chr14	.	18100585	18115934	MSTRG.10495.1	1	15350	MSTRG.10495	.	0.760911	0.457019	2.13247	0.699808	0.675811	0.670328	0.538635	0.124186	0.60167	0.518044	1.92674	0.94616	0.224448	1	up	no
68609	i	chr6	.	70914987	70932908	MSTRG.28173.1	1	17922	MSTRG.28173	CASZ1	0.280137	0.834914	0.774281	0.547799	0.501443	0.67094	1.08687	0.751967	0.760618	1.97338	0.560393	-0.83549	0.225207	1	down	no
42022	i	chr2	-	9199737	9212730	MSTRG.17581.13	5	950	MSTRG.17581	ENSSSCG00000036669	1.02549	1.36005	14.0014	5.37545	0.071946	1.7725	0.950553	3.4433	1.29636	1.10079	2.5497	1.35033	0.22526	1	up	no
24382	u	chr14	.	3859861	3861198	MSTRG.10245.1	1	1338	MSTRG.10245	.	0.543749	0.355238	2.03192	1.11176	0.611452	0.286106	0.365526	0.035771	0.624368	0.53008	2.52687	1.33735	0.225706	1	up	no
27700	x	chr14	+	74683437	74693033	MSTRG.11598.1	1	9597	MSTRG.11598	VSIR	0.64009	1.25813	0.973079	1.23006	1.24702	1.53696	1.45893	2.29041	1.35267	2.74861	0.569728	-0.811655	0.226175	1	down	no
8177	i	chr1	.	272565117	272566177	MSTRG.3497.1	1	1061	MSTRG.3497	AK8	0.371072	0.360361	0.428352	0.107812	0.171947	0.298761	0.987994	0.182745	0.307859	1.92258	0.389072	-1.36189	0.226495	1	down	no
31864	u	chr15	.	67412557	67422187	MSTRG.13370.1	1	9631	MSTRG.13370	.	0.322813	0.697283	0.801822	0.866265	0.412442	1.60198	0.599144	1.78089	1.32295	0.653859	0.520341	-0.94247	0.226497	1	down	no
90637	u	chrY	.	24407872	24408844	MSTRG.37085.1	1	973	MSTRG.37085	.	63.3819	8.24861	9.10867	4.05641	2.43664	53.2651	26.384	32.9034	28.7856	41.1092	0.478123	-1.06455	0.226815	1	down	no
83427	u	chr9	-	25957827	25960620	MSTRG.34218.1	2	2586	MSTRG.34218	.	0.02923	0.111806	1.34588	1.54647	0.041686	1.43062	1.54705	1.5308	2.07998	1.185	0.395587	-1.33793	0.227312	1	down	no
56250	i	chr4	-	67486513	67504341	MSTRG.23183.3	3	15375	MSTRG.23183	ARFGEF1	0.941932	2.52103	2.07756	2.53861	1.10963	0.956351	1.05702	0.0001	0.0001	1.02873	3.02033	1.59471	0.227366	1	up	no
8175	i	chr1	.	272534820	272536107	MSTRG.3495.1	1	1288	MSTRG.3495	AK8	0.297724	0.485315	0.522257	0.278088	0.112307	0.368496	1.09562	0.261203	0.129769	2.5149	0.388031	-1.36576	0.227853	1	down	no
70164	i	chr6	.	95340987	95342104	MSTRG.28721.1	1	1118	MSTRG.28721	ENSSSCG00000032082	1.76909	0.40544	1.15833	0.947108	1.83763	0.397613	0.468881	0.751521	0.680072	0.382154	2.28248	1.1906	0.227891	1	up	no
54073	x	chr3	-	117823408	117875643	MSTRG.22292.1	2	5755	MSTRG.22292	PUM2	0.547881	0.496264	0.600604	0.506492	0.608087	0.620762	3.05519	0.830307	0.589924	0.463452	0.496314	-1.01067	0.227939	1	down	no
39905	i	chr18	.	26599607	26607269	MSTRG.16720.1	1	7663	MSTRG.16720	KCND2	0.445213	0.33059	0.092326	0.229063	0.309665	0.235097	2.1972	0.192025	0.18485	0.336984	0.447167	-1.16111	0.228129	1	down	no
90491	u	chrY	-	5819248	5823836	MSTRG.37014.1	1	4589	MSTRG.37014	.	15.6712	0.94327	0.852649	1.89977	1.27912	1.22619	5.16038	1.06719	1.03424	0.928248	2.19259	1.13264	0.228545	1	up	no
58240	o	chr4	+	101542843	101572768	MSTRG.23875.1	2	1938	MSTRG.23875	ZNF697	272.272	6.02393	2.49304	30.4307	11.4004	6.45775	98.1776	6.49295	6.16418	1.86125	2.7076	1.43701	0.228631	1	up	no
35801	u	chr16	.	67897853	67916043	MSTRG.15063.1	1	18191	MSTRG.15063	.	0.16865	1.13951	0.098854	0.372276	0.690656	1.28726	0.180044	2.15491	0.408601	1.14049	0.477625	-1.06605	0.228695	1	down	no
11447	u	chr11	+	9619789	9624418	MSTRG.4918.1	2	4558	MSTRG.4918	.	0.406814	0.01888	0.039402	0.086224	0.5902	0.751935	0.163316	1.8451	0.131977	0.230233	0.365572	-1.45177	0.228719	1	down	no
78902	i	chr8	.	12339332	12339646	MSTRG.32337.1	1	315	MSTRG.32337	QDPR	0.483596	1.84648	0.077944	1.70535	0.705804	3.93131	1.80048	2.90409	1.50687	2.56717	0.379166	-1.3991	0.228851	1	down	no
23349	u	chr13	.	168841071	168848783	MSTRG.9846.1	1	7713	MSTRG.9846	.	0.348725	1.03231	0.475321	0.805485	0.704187	0.963819	1.98303	1.38945	1.08363	0.914726	0.531367	-0.912219	0.228935	1	down	no
10441	o	chr10	+	53824755	53864545	MSTRG.4503.1	2	924	MSTRG.4503	NEBL	0.451069	0.4664	0.424397	0.704219	0.988765	1.88645	1.03695	2.00445	1.11464	0.99432	0.431282	-1.2133	0.228957	1	down	no
17724	i	chr13	+	16070037	16132177	MSTRG.7514.4	2	37836	MSTRG.7514	RBMS3	0.0001	1.38349	0.241167	0.482872	0.446888	0.0001	0.0001	0.229221	0.0001	0.304574	4.78289	2.25788	0.229274	1	up	no
1991	x	chr1	+	74044869	74067836	MSTRG.871.1	2	2416	MSTRG.871	SEC63	1.49511	2.01132	1.57946	1.48538	2.21468	0.0001	0.0001	0.707635	0.0001	1.67042	3.69413	1.88523	0.229358	1	up	no
74977	i	chr7	+	40767235	40768590	MSTRG.30739.1	1	1356	MSTRG.30739	CLIC5	0.851014	0.478902	0.698449	0.866195	0.478004	0.682634	4.5363	0.583548	0.343846	1.48753	0.44179	-1.17857	0.229378	1	down	no
2298	i	chr1	+	86453617	86462818	MSTRG.1019.1	2	7073	MSTRG.1019	SH3BGRL2	0.680597	1.09628	0.89437	0.898851	1.19513	1.29973	2.10443	2.29005	1.02175	1.93861	0.550602	-0.860919	0.229428	1	down	no
39892	u	chr18	.	26400789	26410666	MSTRG.16696.1	1	9878	MSTRG.16696	.	0.373961	0.215077	0.07046	0.272141	0.247598	0.119394	1.68865	0.200089	0.18557	0.407664	0.453314	-1.14142	0.229728	1	down	no
81130	o	chr8	-	104653972	104694422	MSTRG.33282.2	2	10649	MSTRG.33282	SYNPO2	0.08964	0.448055	5.62265	4.2206	4.07953	3.54242	0.280487	1.5907	0.381332	0.926246	2.15147	1.10533	0.229852	1	up	no
24916	u	chr14	.	18119298	18141314	MSTRG.10496.1	1	22017	MSTRG.10496	.	0.650416	0.446212	2.19774	0.657844	0.644189	0.723794	0.570558	0.209896	0.535017	0.487464	1.81911	0.863234	0.23035	1	up	no
73447	o	chr7	-	21582065	21620663	MSTRG.30224.1	2	443	MSTRG.30224	ENSSSCG00000033550	25.8904	13.0442	2.50722	1.51971	16.3229	3.96306	1.85956	0.294559	17.0515	1.16911	2.4359	1.28446	0.230562	1	up	no
73612	x	chr7	-	22827466	22892388	MSTRG.30280.1	2	477	MSTRG.30280	SLA-5	1.36277	57.4929	0.197966	16.91	8.01851	26.9359	43.0749	45.1206	25.3556	55.3565	0.428823	-1.22155	0.230802	1	down	no
9244	i	chr10	-	25503481	25507943	MSTRG.3984.2	1	4463	MSTRG.3984	ENSSSCG00000027557	2.27919	2.18861	1.80565	1.59864	1.94431	0.498244	0.64482	1.89586	0.729089	1.43238	1.88762	0.916571	0.230904	1	up	no
81646	u	chr8	-	126748415	126777433	MSTRG.33504.1	2	2044	MSTRG.33504	.	0.726049	0.769585	0.531082	0.273588	0.651913	1.47862	1.39889	0.905456	0.592236	2.01184	0.462219	-1.11335	0.231129	1	down	no
73626	x	chr7	-	22853237	22958027	MSTRG.30279.13	3	634	MSTRG.30279	SLA-5	0.555819	1.80953	0.730114	5.53591	0.134007	1.21854	9.97154	2.35809	2.04471	5.8566	0.408652	-1.29106	0.23162	1	down	no
37810	i	chr17	-	41996597	42000385	MSTRG.15903.2	1	3789	MSTRG.15903	DHX35	0.716629	0.867787	0.866962	1.54084	0.27942	0.205189	0.120519	0.419937	0.789545	0.467063	2.13342	1.09317	0.232344	1	up	no
35038	u	chr16	.	38757711	38762376	MSTRG.14657.1	1	4666	MSTRG.14657	.	0.44177	0.325132	0.682006	0.265996	0.411077	0.466678	1.43999	0.204028	0.299483	2.22459	0.458703	-1.12437	0.232475	1	down	no
41435	u	chr2	+	6224732	6234310	MSTRG.17365.1	2	5535	MSTRG.17365	.	0.538717	0.627346	0.67833	0.491066	0.527922	1.03236	1.70884	0.535506	1.99679	0.474456	0.498157	-1.00533	0.232498	1	down	no
31423	i	chr15	-	54623272	54631632	MSTRG.13203.2	2	2744	MSTRG.13203	RBPMS	0.147028	2.47863	1.25182	0.276455	0.422558	0.077954	0.163186	0.137472	0.168459	1.24799	2.54949	1.35021	0.232586	1	up	no
72994	u	chr7	.	10729237	10732599	MSTRG.29960.1	1	3363	MSTRG.29960	.	0.038839	1.93171	0.24165	0.141878	0.247611	0.110119	0.199522	0.130892	0.398239	0.195056	2.51656	1.33145	0.232668	1	up	no
54783	u	chr4	-	6952880	6986998	MSTRG.22539.1	2	33124	MSTRG.22539	.	0.221602	0.0001	0.0001	0.103776	0.092607	0.0001	0.11171	2.12626	0.0001	0.079575	0.180428	-2.47051	0.233056	1	down	no
21243	u	chr13	.	107953453	107988261	MSTRG.8953.1	1	34809	MSTRG.8953	.	0.480161	0.812011	1.12091	0.988968	1.06409	0.829037	2.87849	1.07944	0.43329	2.40451	0.58574	-0.771667	0.233452	1	down	no
8842	u	chr10	.	17657890	17658116	MSTRG.3790.1	1	227	MSTRG.3790	.	1.12551	0.886666	5.41723	3.74592	3.33117	0.664312	0.579214	1.86221	1.08594	1.60936	2.50068	1.32232	0.233618	1	up	no
58461	i	chr4	+	107028032	107050845	MSTRG.23980.1	2	8176	MSTRG.23980	MAGI3	0.79768	0.428345	0.951061	1.33645	1.13891	1.53916	2.01398	2.45295	1.18531	1.21224	0.553623	-0.853024	0.233706	1	down	no
72684	i	chr7	.	1006495	1006920	MSTRG.29820.1	1	426	MSTRG.29820	GMDS	0.63725	0.659678	0.988376	1.14685	1.92542	4.65763	0.826223	3.6748	1.56761	2.06144	0.418963	-1.2551	0.233785	1	down	no
32660	i	chr15	+	95642858	95643648	MSTRG.13693.1	1	791	MSTRG.13693	STAT1	1.58027	0.568633	0.954087	2.14308	2.00994	0.991258	0.655676	0.0001	0.372925	0.626108	2.74219	1.45533	0.233807	1	up	no
31477	i	chr15	-	56225868	56250140	MSTRG.13223.1	1	24273	MSTRG.13223	MFHAS1	5.61089	12.5161	5.25289	5.52636	6.70576	4.78021	2.01183	4.54362	6.87688	4.05091	1.59957	0.677687	0.233868	1	up	no
54045	i	chr3	-	115079461	115085685	MSTRG.22274.1	1	6225	MSTRG.22274	KLHL29	2.9316	1.62031	1.55817	1.70007	2.96867	1.29874	1.01294	1.44654	1.1449	1.23366	1.75643	0.812647	0.233875	1	up	no
13512	u	chr12	+	7685511	7698249	MSTRG.5807.2	2	11318	MSTRG.5807	.	1.34058	1.29635	0.747408	0.770595	0.731347	0.662134	0.448292	0.786218	0.196074	0.0001	2.33478	1.22329	0.234527	1	up	no
49014	u	chr3	.	6543442	6544413	MSTRG.20168.1	1	972	MSTRG.20168	.	1.53098	2.10228	1.15335	1.89888	1.22942	0.654344	0.307167	0.462753	0.971643	1.17688	2.21533	1.14752	0.234558	1	up	no
23279	u	chr13	-	164602372	164639178	MSTRG.9815.1	1	36807	MSTRG.9815	.	0.058999	2.66365	0.052187	0.146219	1.53464	0.35586	0.524323	4.55371	4.21218	0.964692	0.419923	-1.2518	0.23464	1	down	no
85585	j	chr9	+	86021063	86033388	MSTRG.35001.2	4	3186	MSTRG.35001	TSPAN13	1.51771	0.937201	0.986659	1.22798	1.01806	1.08012	5.52518	1.12588	0.866676	2.67164	0.504691	-0.986528	0.23477	1	down	no
19464	u	chr13	-	46290198	46313167	MSTRG.8211.1	1	22970	MSTRG.8211	.	1.41099	0.372579	1.53191	0.747354	1.48863	0.919178	1.92996	4.49486	0.529562	2.14332	0.554212	-0.851491	0.235499	1	down	no
4529	i	chr1	-	158450397	158456122	MSTRG.1910.1	1	5726	MSTRG.1910	KDSR	0.336509	0.0001	0.772596	0.645218	0.297178	0.005455	1.61646	0.325414	0.693535	3.22458	0.349777	-1.51549	0.235591	1	down	no
52194	u	chr3	+	63821414	63889507	MSTRG.21503.2	2	8896	MSTRG.21503	.	0.0001	1.49673	0.0001	0.0001	1.27443	2.40694	0.23567	3.65156	1.81751	2.6357	0.257874	-1.95526	0.235623	1	down	no
71789	i	chr6	-	155029403	155045606	MSTRG.29445.1	2	12967	MSTRG.29445	DAB1	0.148108	0.090862	0.010347	0.003291	0.874568	1.12572	0.261317	0.691912	0.009974	1.05011	0.359084	-1.47761	0.235785	1	down	no
81942	u	chr8	.	132402235	132405509	MSTRG.33637.1	1	3275	MSTRG.33637	.	0.610032	0.748575	0.636016	0.717139	0.520166	0.860037	1.05908	0.680257	1.44352	2.61212	0.485638	-1.04205	0.235787	1	down	no
71253	i	chr6	-	136261738	136297060	MSTRG.29187.5	2	10343	MSTRG.29187	ST6GALNAC5	0.272275	2.38382	0.88722	0.730841	0.0001	6.1761	0.235882	4.5788	0.0001	3.29266	0.299244	-1.74061	0.236002	1	down	no
59004	i	chr4	+	122238395	122244863	MSTRG.24218.1	3	6142	MSTRG.24218	ENSSSCG00000039854	5.5842	0.763227	0.449835	1.67107	0.864752	1.23777	0.968392	0.936571	0.679322	0.0001	2.44184	1.28797	0.236022	1	up	no
35624	u	chr16	.	56510452	56521167	MSTRG.14954.1	1	10716	MSTRG.14954	.	0.252143	0.208748	1.98627	0.755349	1.72586	0.532099	0.379485	0.33775	0.438555	0.754359	2.01796	1.0129	0.236317	1	up	no
24913	u	chr14	.	18085098	18087541	MSTRG.10493.1	1	2444	MSTRG.10493	.	0.648237	0.479207	2.80797	0.681491	0.631873	0.764695	0.574524	0.237287	0.446561	0.336837	2.22415	1.15325	0.236937	1	up	no
556	x	chr1	-	13723445	13733063	MSTRG.343.1	2	6971	MSTRG.343	ENSSSCG00000004081	3.58424	2.22924	1.36227	1.55905	0.889804	4.33061	3.22834	3.72652	3.32078	2.32416	0.56848	-0.814819	0.237228	1	down	no
77951	i	chr7	.	111918802	111920553	MSTRG.31962.1	1	1752	MSTRG.31962	KCNK13	0.049672	0.272595	0.573777	0.10385	0.189655	0.164631	0.483436	0.267899	0.232523	1.8861	0.391996	-1.35109	0.237758	1	down	no
23807	i	chr13	-	197268783	197281257	MSTRG.10023.1	2	11503	MSTRG.10023	ITSN1	0.683473	0.975108	2.1301	2.21254	0.896832	0.753933	0.722094	0.836795	0.840115	0.750662	1.7671	0.821385	0.238282	1	up	no
1985	i	chr1	-	73869856	73870614	MSTRG.867.1	2	379	MSTRG.867	SCML4	1.37386	2.9954	4.48467	1.6101	1.46113	0.659745	0.935248	0.819803	1.09828	1.5926	2.33566	1.22383	0.238695	1	up	no
36542	i	chr17	+	13955732	13974578	MSTRG.15348.1	2	4220	MSTRG.15348	SLC23A2	1.39289	0.168501	0.361763	0.853977	0.128487	0.362825	0.392279	0.0001	0.153113	0.0001	3.19855	1.67742	0.239572	1	up	no
72998	u	chr7	.	10770277	10774389	MSTRG.29964.1	1	4113	MSTRG.29964	.	0.145998	1.9092	0.15944	0.129615	0.233529	0.267663	0.142372	0.098785	0.270186	0.323146	2.33886	1.22581	0.239708	1	up	no
31478	i	chr15	-	56250987	56262005	MSTRG.13221.2	2	7993	MSTRG.13221	MFHAS1	3.89835	7.56193	3.82122	3.61624	4.49317	3.53779	1.54904	2.59327	4.30841	2.49778	1.61469	0.691259	0.241036	1	up	no
8958	i	chr10	+	19881889	19888367	MSTRG.3809.1	1	6479	MSTRG.3809	TP53BP2	5.04081	1.99105	3.01379	3.43552	2.20478	1.92805	1.93102	2.38318	1.56895	1.56255	1.67339	0.742774	0.241055	1	up	no
55184	i	chr4	-	20676802	20713338	MSTRG.22723.2	3	33171	MSTRG.22723	EXT1	0.897175	0.0001	0.0001	2e-06	1.10932	0.0001	0.0001	0.0001	0.0001	0.223275	8.9715	3.16535	0.241114	1	up	no
24386	u	chr14	.	3881486	3889574	MSTRG.10249.1	1	8089	MSTRG.10249	.	0.964099	0.782564	1.9152	0.975461	0.685708	0.57855	0.502032	0.282478	0.619584	0.8356	1.88878	0.917452	0.241153	1	up	no
65820	i	chr6	.	42542631	42543140	MSTRG.27088.1	1	510	MSTRG.27088	ANKRD27	4.28479	3.85748	5.28469	3.9614	5.18871	1.68907	2.23668	2.46878	1.82105	2.73136	2.06241	1.04433	0.241228	1	up	no
80402	u	chr8	-	72860438	72867653	MSTRG.32963.1	1	7216	MSTRG.32963	.	1.78312	1.5027	1.51471	0.582195	2.75135	0.885978	0.096622	1.26544	1.23614	0.825279	1.88749	0.916472	0.24128	1	up	no
30194	o	chr14	+	141171622	141396770	MSTRG.12662.1	2	3560	MSTRG.12662	KNDC1	0.961934	0.392761	0.141995	0.155157	0.328581	0.449729	0.742565	0.249657	0.478977	2.72275	0.426478	-1.22946	0.24134	1	down	no
9596	i	chr10	+	32937678	32954159	MSTRG.4135.1	3	10502	MSTRG.4135	UBE2R2	1.15457	2.01477	2.12896	0.784563	1.8755	1.20088	0.777122	1.16864	0.825452	0.651935	1.72109	0.783321	0.241405	1	up	no
50359	u	chr3	.	26872121	26873286	MSTRG.20756.1	1	1166	MSTRG.20756	.	0.217388	0.415587	1.93366	1.29242	0.375511	0.058946	0.21575	0.535569	0.642633	0.251484	2.48451	1.31296	0.241583	1	up	no
90536	u	chrY	-	7226645	7228356	MSTRG.37052.1	1	1712	MSTRG.37052	.	5.66129	0.470442	0.391337	0.606058	0.246847	0.320626	1.89496	0.132029	0.248139	0.099691	2.73646	1.45231	0.241698	1	up	no
43192	i	chr2	+	36736870	36756983	MSTRG.17928.1	2	15014	MSTRG.17928	GAS2	0.892204	0.340766	0.152474	0.094012	0.146395	0.17336	2.58247	0.147116	0.502324	0.176953	0.453867	-1.13966	0.241883	1	down	no
35613	u	chr16	.	56386821	56391654	MSTRG.14943.1	1	4834	MSTRG.14943	.	0.292151	0.101406	1.88486	0.939003	1.75064	0.599434	0.375332	0.30715	0.330326	0.649583	2.19648	1.13519	0.242151	1	up	no
54731	o	chr4	+	2849041	2850694	MSTRG.22525.1	2	1386	MSTRG.22525	ssc-mir-151	0.232635	0.0001	0.492005	0.41564	0.0001	1.28743	0.620412	0.627659	0.62352	0.415932	0.319019	-1.64828	0.242494	1	down	no
5020	i	chr1	-	172101359	172129408	MSTRG.2155.1	1	28050	MSTRG.2155	LRFN5	0.805953	0.948267	1.15716	1.82029	0.881651	1.01677	0.687996	1.08929	2.88644	4.10979	0.573356	-0.802496	0.242679	1	down	no
85965	i	chr9	.	102972828	102973526	MSTRG.35169.1	1	699	MSTRG.35169	LRRC17	0.565685	0.322063	0.828055	0.482766	1.08852	1.45169	1.24789	1.74828	1.83264	1.13929	0.443017	-1.17457	0.243188	1	down	no
9670	u	chr10	.	36218665	36219077	MSTRG.4163.1	1	413	MSTRG.4163	.	1.89681	2.5158	1.88803	3.34042	3.40795	1.76873	0.745607	2.15514	0.0001	0.207267	2.67571	1.41992	0.24329	1	up	no
42082	i	chr2	-	9210665	9212216	MSTRG.17581.67	3	400	MSTRG.17581	ENSSSCG00000036669	9.24553	9.88599	15.8495	11.6605	10.7608	4.72519	3.87549	4.25085	3.69224	12.1077	2.00347	1.0025	0.2433	1	up	no
39826	u	chr18	.	24015456	24018095	MSTRG.16679.1	1	2640	MSTRG.16679	.	0.813819	0.205071	0.204604	0.412026	0.233972	0.421606	1.76561	0.32547	0.511067	1.10601	0.452688	-1.14341	0.243346	1	down	no
57818	u	chr4	.	97738472	97738695	MSTRG.23689.1	1	224	MSTRG.23689	.	4.02719	0.396884	0.327273	2.74799	2.87065	7.89799	1.73233	11.4652	1.31211	4.69932	0.382558	-1.38625	0.24351	1	down	no
75309	o	chr7	+	49575597	49664849	MSTRG.30867.1	2	13283	MSTRG.30867	CEMIP	0.869044	0.573237	0.689021	0.377803	3.01824	1.06579	0.564427	0.421309	0.268717	0.567571	1.91402	0.936607	0.243632	1	up	no
86104	u	chr9	.	105989614	105995350	MSTRG.35225.1	1	5737	MSTRG.35225	.	0.6026	0.884418	0.871292	0.870163	0.868065	1.12687	1.35421	1.42735	1.49789	2.17041	0.540673	-0.887172	0.243961	1	down	no
90539	u	chrY	+	7244590	7255854	MSTRG.37055.1	1	11265	MSTRG.37055	.	9.652	0.686752	0.618408	0.655163	0.442207	0.647446	3.41071	0.532399	0.448784	0.468557	2.18859	1.13	0.244222	1	up	no
47600	i	chr2	+	132729287	132738335	MSTRG.19552.1	2	7834	MSTRG.19552	CHSY3	4.95552	4.659	2.65951	1.82174	3.47763	1.84413	0.791476	3.20651	3.21131	1.65276	1.64143	0.714949	0.24477	1	up	no
19473	u	chr13	-	46528945	46539450	MSTRG.8214.1	1	10506	MSTRG.8214	.	1.30146	1.35259	6.02753	2.62728	1.40301	1.61681	0.8569	1.78399	2.28005	0.847435	1.72127	0.78347	0.244848	1	up	no
40217	j	chr18	-	40485924	40490251	MSTRG.16856.1	2	2730	MSTRG.16856	FKBP9	0.382215	0.320392	4.89244	0.447744	0.449488	0.620173	0.419195	0.472573	0.707601	0.594358	2.30722	1.20615	0.244856	1	up	no
49573	i	chr3	+	13929685	13983124	MSTRG.20412.3	2	2683	MSTRG.20412	ENSSSCG00000035984	0.454823	0.262591	1.38675	0.170234	0.146239	2.57697	0.705352	2.34347	0.186748	0.152681	0.405792	-1.30119	0.244964	1	down	no
78228	u	chr7	+	118317140	118333253	MSTRG.32045.1	3	10143	MSTRG.32045	.	0.246138	0.092632	0.231096	0.017423	1.33773	2.44041	0.03039	1.9014	0.10571	0.491273	0.387392	-1.36813	0.245239	1	down	no
10564	u	chr10	+	57532269	57542274	MSTRG.4581.3	3	1738	MSTRG.4581	.	0.221334	0.046927	1.97289	1.93805	1.97061	0.0001	0.0001	0.001809	1.58411	0.014013	3.84332	1.94235	0.245381	1	up	no
62393	i	chr5	+	60717268	60738887	MSTRG.25522.1	2	20609	MSTRG.25522	ETV6	7.17254	3.7089	3.36888	5.03097	0.715834	4.41215	2.41509	0.91414	1.05289	2.6904	1.7412	0.800083	0.245522	1	up	no
209	i	chr1	.	5141868	5143866	MSTRG.80.1	1	1999	MSTRG.80	PACRG	0.229312	0.666662	0.464291	0.286195	0.353778	0.242476	1.37039	0.428786	0.472455	1.92176	0.450924	-1.14904	0.245765	1	down	no
80803	i	chr8	-	86192070	86202223	MSTRG.33147.1	2	9844	MSTRG.33147	RNF150	6.30524	0.544735	0.593476	0.905506	0.514829	0.256478	2.31393	0.338559	0.430846	0.814413	2.13368	1.09334	0.245801	1	up	no
35056	u	chr16	.	39158207	39164287	MSTRG.14674.1	1	6081	MSTRG.14674	.	0.436651	0.384844	0.508046	0.280712	0.211446	0.308939	1.21379	0.114441	0.352514	1.91223	0.466872	-1.0989	0.245846	1	down	no
4586	i	chr1	+	161362825	161374923	MSTRG.1934.1	2	10942	MSTRG.1934	CCBE1	0.168695	0.569654	0.18871	3.66629	2.30134	1.67417	3.01903	0.336084	2.36146	6.63624	0.49153	-1.02465	0.245911	1	down	no
23276	u	chr13	+	164542121	164555808	MSTRG.9813.1	1	13688	MSTRG.9813	.	0.066354	1.60134	0.032236	0.133578	0.974518	0.268889	0.354541	2.66702	2.57195	0.72232	0.426447	-1.22956	0.245941	1	down	no
23849	i	chr13	+	198397564	198409002	MSTRG.10030.1	1	11439	MSTRG.10030	RUNX1	3.786	2.86027	3.39318	3.1667	3.75871	2.55248	1.45328	2.40759	2.49945	1.80601	1.58272	0.662405	0.246136	1	up	no
10719	u	chr10	+	61070074	61084537	MSTRG.4642.2	2	13860	MSTRG.4642	.	1.20743	1.41556	1.92386	1.91863	1.71111	0.894688	0.963686	0.490735	1.21601	1.34264	1.66606	0.736439	0.246346	1	up	no
64542	u	chr6	.	8703789	8705062	MSTRG.26501.1	1	1274	MSTRG.26501	.	1.65219	1.78458	1.78245	1.34898	0.584889	1.0139	0.138259	0.457535	1.08713	0.687636	2.11351	1.07964	0.246676	1	up	no
38833	i	chr18	+	5025715	5065421	MSTRG.16276.1	3	7875	MSTRG.16276	KMT2C	1.28321	1.15961	1.13132	0.799586	2.03833	0.934322	0.555834	0.996351	0.610725	0.472871	1.79604	0.84482	0.246793	1	up	no
81938	u	chr8	.	132356884	132359512	MSTRG.33633.1	1	2629	MSTRG.33633	.	0.569932	0.794825	1.0934	1.06336	0.84913	0.822612	1.67398	0.72004	1.95359	3.67933	0.493884	-1.01776	0.247103	1	down	no
24892	u	chr14	.	17884006	17886541	MSTRG.10472.1	1	2536	MSTRG.10472	.	0.632367	0.239896	1.74968	0.401319	0.188574	0.449143	0.379302	0.066744	0.194347	0.250884	2.39615	1.26072	0.247163	1	up	no
24912	u	chr14	.	18077791	18083832	MSTRG.10492.1	1	6042	MSTRG.10492	.	0.658986	0.348585	2.38774	0.523106	0.617204	0.583467	0.516973	0.235159	0.424341	0.446836	2.05532	1.03936	0.247727	1	up	no
65932	i	chr6	.	44257736	44258244	MSTRG.27145.1	1	509	MSTRG.27145	ENSSSCG00000002877	0.171887	1.01827	0.410867	0.656562	0.382314	1.73157	0.173027	0.845249	2.65914	1.43277	0.385851	-1.37389	0.24773	1	down	no
87252	u	chrX	+	638235	653764	MSTRG.35716.1	1	15530	MSTRG.35716	.	10.1528	0.988131	1.05276	0.837696	0.892643	1.50796	3.36972	1.21093	0.534109	0.243447	2.02793	1.02	0.247744	1	up	no
35040	u	chr16	.	38786968	38791279	MSTRG.14659.1	1	4312	MSTRG.14659	.	0.259021	0.316209	0.661511	0.183538	0.314326	0.299045	1.1285	0.25355	0.27559	1.76886	0.465598	-1.10284	0.248011	1	down	no
22546	i	chr13	.	140515459	140518943	MSTRG.9492.1	1	3485	MSTRG.9492	ENSSSCG00000011892	0.249402	1.86487	0.831631	0.171139	0.416138	0.089731	0.364016	0.112526	0.068101	0.827819	2.41636	1.27283	0.248151	1	up	no
27345	x	chr14	+	63526631	63553606	MSTRG.11432.2	2	5629	MSTRG.11432	ENSSSCG00000010212	1.62756	0.503698	0.724562	2.03304	2.10586	0.483138	0.482446	0.830377	0.990069	0.903811	1.89567	0.922708	0.248212	1	up	no
38314	i	chr17	+	54172166	54218348	MSTRG.16104.1	2	45399	MSTRG.16104	ENSSSCG00000040839	2.81571	1.93039	0.0001	0.0001	4.9993	0.0001	0.090362	0.0001	1.40225	0.0001	6.5279	2.70662	0.248305	1	up	no
9041	x	chr10	-	22758565	22831345	MSTRG.3906.1	4	11300	MSTRG.3906	NR5A2	21.2015	5.8954	0.188068	1.85363	1.23837	0.547849	5.98522	1.67859	5.1512	0.786908	2.14682	1.1022	0.248429	1	up	no
35622	u	chr16	+	56472546	56477333	MSTRG.14952.1	1	4788	MSTRG.14952	.	0.280476	0.150604	1.78804	0.768351	1.77589	0.677539	0.250407	0.224039	0.475976	0.580443	2.15692	1.10898	0.248525	1	up	no
35619	u	chr16	.	56443827	56445972	MSTRG.14949.1	1	2146	MSTRG.14949	.	0.242012	0.11814	2.17793	0.828592	1.47634	0.354535	0.287277	0.301087	0.458192	0.712765	2.29108	1.19603	0.248583	1	up	no
79771	i	chr8	-	48035797	48051581	MSTRG.32738.2	2	13772	MSTRG.32738	RAPGEF2	0.26741	0.0001	0.0001	0.303257	0.0001	0.0001	0.018815	0.0001	3.6946	0.187153	0.146373	-2.77228	0.248827	1	down	no
24899	u	chr14	.	17955247	17959255	MSTRG.10479.1	1	4009	MSTRG.10479	.	0.420064	0.387547	1.74517	0.478424	0.413644	0.494242	0.334354	0.067623	0.249731	0.421102	2.1983	1.13639	0.248858	1	up	no
10505	x	chr10	+	56430758	56559554	MSTRG.4543.3	10	9761	MSTRG.4543	NRP1	1.99291	1.39663	2.19069	1.06137	1.35283	3.30951	2.37606	3.00804	2.75245	1.83886	0.601767	-0.732724	0.248872	1	down	no
40759	i	chr18	-	54087381	54099950	MSTRG.17118.1	2	11658	MSTRG.17118	SUGCT	0.094787	2.49945	0.193265	0.689966	1.09488	0.21317	0.235682	1.18566	0.153511	0.0001	2.55706	1.35449	0.248903	1	up	no
57255	i	chr4	+	92721723	92726089	MSTRG.23533.1	2	3774	MSTRG.23533	ENSSSCG00000036622	1.55356	0.172754	0.05048	0.855333	0.280095	0.263685	4.41613	1.53836	0.98662	0.045945	0.401646	-1.316	0.249123	1	down	no
59417	i	chr4	.	130790356	130792051	MSTRG.24382.1	1	1696	MSTRG.24382	WDR63	0.881267	2.14843	1.13483	0.773174	0.672468	2.0905	3.86315	0.749075	1.55625	3.3294	0.48412	-1.04656	0.249424	1	down	no
35782	u	chr16	-	67423579	67447151	MSTRG.15044.1	1	23573	MSTRG.15044	.	0.615485	1.95443	2.83146	1.31197	1.17597	0.740917	0.492753	1.15852	1.29099	1.09281	1.65187	0.724101	0.249443	1	up	no
79382	u	chr8	-	36950420	36957457	MSTRG.32575.1	1	7038	MSTRG.32575	.	0.212233	2.38232	0.034886	0.070901	0.83958	3.64151	0.0001	3.96063	1.2487	1.45914	0.343345	-1.54227	0.249618	1	down	no
35826	u	chr16	.	68157595	68158517	MSTRG.15029.1	1	923	MSTRG.15029	.	0.630584	0.826011	0.001887	0.337142	0.48017	1.82533	0.214521	1.28274	0.859536	1.83167	0.37843	-1.4019	0.250306	1	down	no
23412	u	chr13	+	177847006	177885490	MSTRG.9863.8	2	38456	MSTRG.9863	.	0.653646	0.562964	2.3156	1.75276	1.67007	7.00728	0.550516	0.0001	5.60219	4.18724	0.400928	-1.31859	0.250324	1	down	no
89379	u	chrX	.	89409356	89410482	MSTRG.36609.1	1	1127	MSTRG.36609	.	0.678586	0.709246	1.84328	0.971833	0.848812	0.469229	0.155877	0.815422	0.620638	0.208203	2.22606	1.15449	0.250448	1	up	no
48398	i	chr2	.	148201632	148205591	MSTRG.19872.1	1	3960	MSTRG.19872	ENSSSCG00000031406	0.119987	0.20883	0.50133	0.518504	0.425724	0.174125	1.54478	0.231184	0.15879	1.82602	0.450933	-1.14902	0.250674	1	down	no
53915	o	chr3	-	113016171	113140062	MSTRG.22219.1	4	6042	MSTRG.22219	ENSSSCG00000038876	1.36373	0.402036	0.468838	0.492454	0.399231	1.61945	2.04779	2.03168	0.449321	0.2628	0.487641	-1.03611	0.250991	1	down	no
83205	i	chr9	+	17205895	17209543	MSTRG.34119.1	2	3558	MSTRG.34119	RAB30	3.21258	3.81186	4.85154	3.70042	0.0001	3.30375	0.0001	0.0001	0.24334	0.0001	4.39097	2.13454	0.251035	1	up	no
45113	u	chr2	.	70401478	70402193	MSTRG.18546.1	1	716	MSTRG.18546	.	2.1737	1.35908	1.48765	1.0071	0.712303	0.504563	0.427025	0.685293	0.795998	0.651829	2.19918	1.13696	0.251107	1	up	no
80937	o	chr8	-	90276387	90424187	MSTRG.33207.1	3	893	MSTRG.33207	ENSSSCG00000036773	0.367866	0.543998	0.0001	0.29643	1.09411	1.1569	0.165772	1.95516	0.778565	2.39221	0.357055	-1.48578	0.251282	1	down	no
90496	i	chrY	-	5851946	5856198	MSTRG.37017.1	1	4253	MSTRG.37017	ENSSSCG00000012833	9.4027	0.828973	0.764181	1.09065	0.776775	1.21728	2.8664	0.988144	0.338471	0.6096	2.1368	1.09545	0.251465	1	up	no
20256	o	chr13	+	71761094	71782275	MSTRG.8526.1	4	3090	MSTRG.8526	ENSSSCG00000039437	1.38748	0.0001	0.692913	0.536737	1.2467	2.4692	2.0498	1.42936	2.26534	1.09449	0.415111	-1.26843	0.251569	1	down	no
16098	i	chr12	+	46971224	46977523	MSTRG.6775.1	2	6004	MSTRG.6775	NXN	0.563075	0.527288	0.919534	1.50848	1.34696	0.342318	0.299173	0.347338	0.401077	1.06402	1.98267	0.987447	0.252132	1	up	no
60540	u	chr5	.	17393141	17395979	MSTRG.24851.1	1	2839	MSTRG.24851	.	0.541763	1.58373	1.78946	0.934412	1.13921	0.571458	0.482213	0.828535	0.406298	0.696703	2.00608	1.00438	0.252287	1	up	no
49572	i	chr3	+	13926283	13983113	MSTRG.20412.2	3	5474	MSTRG.20412	ENSSSCG00000035984	1.4169	0.218638	0.528216	2.33373	0.960761	1.21557	0.247973	0.0001	0.41075	0.326892	2.47958	1.3101	0.252316	1	up	no
9101	u	chr10	-	23838910	23841588	MSTRG.3928.1	2	1653	MSTRG.3928	.	0.079393	0.45128	0.875949	0.397869	0.608459	0.557899	0.383765	0.576457	0.444579	3.63508	0.431055	-1.21406	0.252362	1	down	no
85852	j	chr9	+	99251419	99283116	MSTRG.35100.2	3	2049	MSTRG.35100	SEMA3C	0.209634	0.476174	0.570918	0.243374	0.478264	0.396469	0.49827	0.680842	0.308997	2.50697	0.450494	-1.15042	0.252389	1	down	no
70695	i	chr6	-	108188940	108192499	MSTRG.28969.1	2	2983	MSTRG.28969	CABLES1	0.771481	1.55793	1.41278	1.65554	1.61431	3.96816	0.731234	4.47745	1.92009	2.54472	0.514016	-0.960114	0.252509	1	down	no
5780	o	chr1	-	201664955	201731991	MSTRG.2486.3	9	5476	MSTRG.2486	ENSSSCG00000035294	0.344669	0.391455	0.620114	0.519154	0.571285	0.160169	0.003153	0.333242	0.529857	0.020542	2.33693	1.22461	0.252591	1	up	no
207	i	chr1	.	5125295	5129508	MSTRG.78.1	1	4214	MSTRG.78	PACRG	0.248701	0.57056	0.507186	0.510292	0.339877	0.338336	1.16282	0.380776	0.50082	2.12464	0.482899	-1.05021	0.252621	1	down	no
83965	u	chr9	+	40092875	40098119	MSTRG.34421.1	1	5245	MSTRG.34421	.	8.89477	0.443259	0.69793	1.30381	0.705146	1.15138	2.05543	0.891173	0.39666	1.34214	2.06363	1.04518	0.252733	1	up	no
27289	i	chr14	-	61797545	61814354	MSTRG.11402.2	3	12654	MSTRG.11402	BICC1	1.7784	1.40027	0.308454	1.46005	2.62274	1.04735	0.0001	0.972407	0.805245	0.624211	2.19461	1.13397	0.25284	1	up	no
45293	i	chr2	-	71853694	71862822	MSTRG.18616.3	2	4574	MSTRG.18616	INSR	0.0001	0.31277	2.06253	0.39118	0.382091	0.380366	0.097637	0.251931	0.0001	0.272114	3.14192	1.65165	0.252951	1	up	no
32739	u	chr15	.	100719840	100723472	MSTRG.13720.1	1	3633	MSTRG.13720	.	0.686726	0.25978	0.540989	0.758581	0.480648	0.687754	1.24498	0.61933	0.587521	2.43409	0.489215	-1.03146	0.252998	1	down	no
4143	i	chr1	-	137658392	137683654	MSTRG.1775.1	2	17342	MSTRG.1775	IGF1R	1.23843	0.977069	1.84218	0.990405	1.04301	1.69622	1.76533	2.64527	2.42299	1.41698	0.612369	-0.707527	0.25322	1	down	no
62791	u	chr5	-	65536745	65547711	MSTRG.25668.1	2	5656	MSTRG.25668	.	0.294532	0.395343	0.0001	0.490733	0.299357	0.17578	3.66382	0.496856	0.045746	0.003757	0.337455	-1.56723	0.253258	1	down	no
83817	o	chr9	-	37910612	38058598	MSTRG.34350.1	2	3325	MSTRG.34350	RF00003	0.172783	2.60325	0.107066	0.744571	1.16587	3.47186	0.083996	3.28308	2.97668	1.59271	0.42018	-1.25092	0.253584	1	down	no
35621	u	chr16	.	56460835	56471684	MSTRG.14951.1	1	10850	MSTRG.14951	.	0.246684	0.20827	1.83121	0.940361	1.73107	0.598424	0.335307	0.369818	0.48998	0.753842	1.94616	0.960632	0.253688	1	up	no
22738	u	chr13	-	144905219	144908635	MSTRG.9631.1	1	3417	MSTRG.9631	.	0.243696	0.428811	0.588345	0.491093	0.465567	0.468213	2.45299	0.553409	0.554325	0.494991	0.490174	-1.02864	0.253757	1	down	no
22555	u	chr13	.	140624135	140631027	MSTRG.9496.1	1	6893	MSTRG.9496	.	0.251985	0.441455	0.423441	0.582524	0.62751	0.443495	0.284285	0.689259	0.359484	3.0376	0.483352	-1.04886	0.2538	1	down	no
81215	u	chr8	-	109927258	109941867	MSTRG.33320.5	2	6875	MSTRG.33320	.	0.069333	0.111214	0.0001	0.0001	0.135465	0.213384	0.0001	0.095119	0.531907	0.372557	0.260672	-1.9397	0.254022	1	down	no
33096	u	chr15	.	109655296	109656902	MSTRG.13866.1	1	1607	MSTRG.13866	.	0.440084	0.581055	2.14061	0.829805	0.614955	0.495898	0.21261	0.506098	0.591699	0.277012	2.21114	1.14479	0.254064	1	up	no
35058	u	chr16	.	39172083	39175331	MSTRG.14676.1	1	3249	MSTRG.14676	.	0.291295	0.400449	0.738595	0.155444	0.223008	0.166553	1.40058	0.224194	0.322597	1.90343	0.450244	-1.15122	0.25409	1	down	no
78794	u	chr8	.	10328022	10332499	MSTRG.32318.1	1	4478	MSTRG.32318	.	0.608895	0.347704	0.296077	0.38754	0.323642	0.603448	1.71965	0.425499	0.6431	0.580733	0.494372	-1.01633	0.254141	1	down	no
8669	u	chr10	+	13974111	13976525	MSTRG.3697.1	2	2381	MSTRG.3697	.	1.79457	2.45717	0.889857	0.0001	1.73832	2.46446	4.98745	1.96125	2.93913	3.80781	0.425741	-1.23195	0.254629	1	down	no
23356	u	chr13	.	172239786	172240288	MSTRG.9848.1	1	503	MSTRG.9848	.	1.69718	1.40263	1.24557	2.74257	2.02075	1.17054	0.969935	1.36982	0.168729	0.218008	2.33735	1.22487	0.254875	1	up	no
83337	u	chr9	-	21022998	21027691	MSTRG.34184.1	1	4694	MSTRG.34184	.	2.44915	1.19799	1.90168	0.0001	2.27007	0.0001	0.0001	0.0001	1.49751	0.0001	5.21994	2.38403	0.254957	1	up	no
63787	i	chr5	+	89454559	89458431	MSTRG.26086.2	2	2178	MSTRG.26086	CRADD	0.009809	0.068718	0.977044	0.231335	0.0001	1.17377	0.20383	0.350169	0.924776	1.15221	0.338263	-1.56378	0.25524	1	down	no
80805	i	chr8	-	86247242	86254220	MSTRG.33148.1	2	6893	MSTRG.33148	RNF150	5.05895	0.323595	0.34113	0.621705	0.395731	0.108533	1.72551	0.335953	0.238657	0.530788	2.29333	1.19744	0.255331	1	up	no
28417	i	chr14	.	96704410	96704889	MSTRG.11895.1	1	480	MSTRG.11895	ENSSSCG00000036144	0.697416	0.247161	0.639568	1.13953	0.450684	1.62033	0.51173	2.22969	2.8902	0.480306	0.410535	-1.28442	0.255405	1	down	no
40942	i	chr2	.	440790	442565	MSTRG.17192.1	1	1776	MSTRG.17192	EPS8L2	0.0001	0.089894	0.151776	0.586929	0.267079	0.250107	0.788156	0.0001	0.233428	2.26851	0.309515	-1.69192	0.255447	1	down	no
84408	u	chr9	-	49123104	49145370	MSTRG.34567.9	2	20626	MSTRG.34567	.	0.727679	0.657565	4.5	1.05523	1.28903	0.941955	0.520571	1.22186	0.968664	0.0001	2.25271	1.17166	0.255635	1	up	no
7515	u	chr1	.	262746106	262747184	MSTRG.3216.1	1	1079	MSTRG.3216	.	0.0001	0.918465	0.136045	0.042647	0.040579	1.02378	0.28539	0.564182	2.31209	0.0001	0.271849	-1.87912	0.255957	1	down	no
23278	u	chr13	+	164573066	164602169	MSTRG.9814.1	1	29104	MSTRG.9814	.	0.039016	2.2992	0.04172	0.158032	1.29481	0.299339	0.419084	3.80992	3.50999	0.845612	0.431427	-1.21281	0.256089	1	down	no
39904	i	chr18	.	26594119	26599120	MSTRG.16719.1	1	5002	MSTRG.16719	KCND2	0.350845	0.5057	0.108196	0.384263	0.187874	0.204984	2.29857	0.217178	0.193123	0.45205	0.456601	-1.13099	0.256376	1	down	no
47375	i	chr2	.	123152970	123164368	MSTRG.19432.1	1	11399	MSTRG.19432	TNFAIP8	0.441152	0.498983	0.847511	0.854859	0.770536	0.812346	1.81361	0.775776	0.804218	1.7305	0.574929	-0.798543	0.256513	1	down	no
21368	i	chr13	-	110589543	110642057	MSTRG.9012.5	2	49293	MSTRG.9012	FNDC3B	0.116784	2.55281	0.071379	4.3347	0.0001	0.099474	0.000118	2e-06	0.0001	1.54731	4.29616	2.10305	0.256722	1	up	no
53453	x	chr3	-	101974399	102023657	MSTRG.22016.2	2	2149	MSTRG.22016	ATL2	1.2838	0.800574	2.25844	1.26293	0.859622	2.36911	3.09725	2.41441	2.61958	1.9387	0.519763	-0.944074	0.25673	1	down	no
42761	i	chr2	-	18638980	18639899	MSTRG.17705.1	1	920	MSTRG.17705	ENSSSCG00000038924	0.773096	0.916214	0.695388	0.513836	0.803245	1.21819	1.32222	1.86241	2.01174	1.5524	0.464642	-1.10581	0.257003	1	down	no
39589	u	chr18	+	17852162	17970341	MSTRG.16591.9	3	29072	MSTRG.16591	.	0.0001	0.0001	0.0001	0.105073	0.0001	0.732505	0.043355	0.028522	0.0001	0.0001	0.13109	-2.93137	0.257198	1	down	no
9804	u	chr10	-	39918128	39932479	MSTRG.4219.12	2	10388	MSTRG.4219	.	0.147454	0.022875	0.073037	0.186557	0.008648	0.076086	0.871096	0.05479	0.041405	0.039655	0.404947	-1.30419	0.257401	1	down	no
37704	i	chr17	+	40150514	40150813	MSTRG.15863.1	1	300	MSTRG.15863	SAMHD1	7.95429	3.34645	9.12271	11.7434	7.4877	4.2789	4.37752	3.47725	2.9636	4.30334	2.04399	1.03139	0.25809	1	up	no
22576	o	chr13	+	140743493	140749841	MSTRG.9500.2	2	2652	MSTRG.9500	ENSSSCG00000032168	2.16304	1.19129	1.61968	0.01547	1.64562	0.048545	0.0001	1.87533	0.0001	0.030811	3.39411	1.76303	0.258117	1	up	no
63733	u	chr5	.	88486624	88489527	MSTRG.26052.1	1	2904	MSTRG.26052	.	0.059721	0.095986	0.35114	0.237238	0.053832	0.164262	0.04334	0.084813	0.089098	1.75639	0.373223	-1.42189	0.25872	1	down	no
31067	i	chr15	+	45088395	45124037	MSTRG.13057.1	2	4944	MSTRG.13057	STOX2	1.07185	0.843554	1.38195	1.39652	1.13755	1.31828	3.15592	1.21573	0.616229	4.42974	0.54317	-0.880523	0.258769	1	down	no
217	i	chr1	.	5352606	5354989	MSTRG.88.1	1	2384	MSTRG.88	PACRG	0.239975	0.349495	0.107955	0.267219	0.151009	0.039803	0.595534	0.138995	0.238104	1.76172	0.40216	-1.31416	0.258858	1	down	no
83022	x	chr9	-	10216401	10244743	MSTRG.34033.1	2	2872	MSTRG.34033	UVRAG	11.5302	1.42436	2.59751	2.72776	2.43919	1.88702	4.12925	1.62839	1.79193	1.5304	1.88922	0.917791	0.258982	1	up	no
64016	i	chr5	.	100812960	100816688	MSTRG.26194.1	1	3729	MSTRG.26194	PTPRQ	0.103833	0.175164	0.337568	0.685753	0.46997	0.512875	1.64152	0.051574	0.60266	1.04493	0.45991	-1.12058	0.259409	1	down	no
64613	i	chr6	.	12043782	12044682	MSTRG.26557.1	1	901	MSTRG.26557	TERF2IP	0.632207	0.493815	0.855966	0.803759	1.1159	1.26627	1.6248	1.56357	1.98966	1.8742	0.469032	-1.09224	0.259687	1	down	no
7992	u	chr1	.	269650618	269653585	MSTRG.3424.1	1	2968	MSTRG.3424	.	0.205091	0.261738	0.889604	0.450336	0.579543	0.345346	1.65572	0.443345	0.448612	2.10261	0.47768	-1.06588	0.260071	1	down	no
7257	i	chr1	.	253945718	253947423	MSTRG.3131.1	1	1706	MSTRG.3131	WDR31	0.908654	0.897001	1.3217	0.973716	0.877459	1.80094	1.6733	1.49971	1.81694	3.06949	0.504902	-0.985924	0.260348	1	down	no
48092	i	chr2	+	142034139	142041956	MSTRG.19746.1	2	6888	MSTRG.19746	PFDN1	0.11413	0.200782	0.71651	0.152525	0.233699	1.0558	0.610239	0.287789	0.908373	0.135599	0.472896	-1.08041	0.260356	1	down	no
23275	u	chr13	-	164499982	164572355	MSTRG.9812.1	2	11752	MSTRG.9812	.	0.022184	1.9925	0.034242	0.144997	1.1006	0.340624	0.489291	3.09103	3.07414	0.82595	0.421239	-1.24729	0.260382	1	down	no
50371	u	chr3	.	27848285	27853785	MSTRG.20768.1	1	5501	MSTRG.20768	.	0.343864	0.302953	0.345982	1.19704	0.688752	1.22799	0.547348	1.8636	1.2669	0.787406	0.505615	-0.983888	0.260465	1	down	no
20047	i	chr13	+	67750376	67773208	MSTRG.8440.1	1	22833	MSTRG.8440	VGLL4	6.56113	4.73174	8.18934	2.70692	3.31739	2.5333	5.02512	2.95787	3.01814	2.27417	1.61346	0.690157	0.260512	1	up	no
90463	o	chrY	+	3627034	3806700	MSTRG.36995.1	3	798	MSTRG.36995	RF00100	0.784298	0.815867	1.22039	0.59888	0.316608	2.12967	0.789247	1.20304	1.95781	2.25198	0.44841	-1.15711	0.260556	1	down	no
34320	j	chr16	+	6170400	6216387	MSTRG.14313.2	4	3370	MSTRG.14313	ENSSSCG00000034022	0.115453	0.0001	3.86333	0.0001	0.038408	0.0001	0.614999	0.043592	0.0001	0.025401	5.87173	2.55379	0.26085	1	up	no
88422	u	chrX	.	49347039	49348307	MSTRG.36210.1	1	1269	MSTRG.36210	.	0.034472	0.00814	0.645752	0.80715	0.962383	1.19277	0.56752	1.45166	1.97266	1.05764	0.393751	-1.34464	0.260944	1	down	no
79916	i	chr8	+	55693641	55696751	MSTRG.32791.1	1	3111	MSTRG.32791	PPAT	1.60814	0.935791	1.3439	2.24574	1.12285	3.81627	3.26081	3.35948	2.03737	1.06994	0.535772	-0.900308	0.261147	1	down	no
8926	u	chr10	+	19284903	19294634	MSTRG.3875.1	2	4076	MSTRG.3875	.	0.204068	0.221458	0.11791	0.676135	0.186195	0.08318	2.15037	0.136408	0.601815	0.206252	0.442339	-1.17678	0.261292	1	down	no
33712	i	chr15	+	130198136	130207549	MSTRG.14090.1	1	9414	MSTRG.14090	PID1	0.0001	0.074422	0.009382	0.033989	0.388615	0.027943	1.31415	0.029671	0.054721	0.053542	0.342228	-1.54697	0.261384	1	down	no
9801	u	chr10	-	39910201	39932482	MSTRG.4219.9	4	15679	MSTRG.4219	.	0.342769	0.005411	0.633837	0.194173	0.033273	0.070109	0.089372	0.246208	0.054038	0.054785	2.3507	1.23309	0.261516	1	up	no
42064	i	chr2	-	9205013	9211882	MSTRG.17581.47	4	466	MSTRG.17581	ENSSSCG00000036669	0.0001	0.314758	3.40446	0.384127	0.619598	1.77335	1.01046	4.94092	2.93644	2.13505	0.369096	-1.43793	0.261739	1	down	no
19475	u	chr13	-	46580695	46582454	MSTRG.8216.1	1	1760	MSTRG.8216	.	0.661421	0.787831	3.56731	1.76919	0.787514	1.05228	0.415849	0.831606	1.06775	0.251206	2.09282	1.06545	0.262094	1	up	no
71785	i	chr6	+	154961365	154980940	MSTRG.29441.2	2	19283	MSTRG.29441	DAB1	0.0001	0.0001	0.747655	0.196784	0.0001	3.63145	0.0001	3.69529	0.0001	0.0001	0.128939	-2.95524	0.262241	1	down	no
64918	i	chr6	+	17411584	17419919	MSTRG.26678.5	3	6921	MSTRG.26678	NFAT5	0.088067	0.160919	2.49322	1.16051	1.37898	0.0001	1.18418	0.239916	0.0001	0.120695	3.41859	1.7734	0.262281	1	up	no
3061	x	chr1	-	112680844	112790774	MSTRG.1333.2	4	50913	MSTRG.1333	MYO1E	0.785939	2.8231	1.56269	2.61743	1.96127	1.26711	1.31482	0.625222	1.81674	1.0537	1.60433	0.681967	0.262286	1	up	no
60780	u	chr5	-	19281676	19286030	MSTRG.24907.2	1	4355	MSTRG.24907	.	1.11034	0.462933	2.12827	1.61751	0.881494	0.767909	0.268064	0.61043	0.570458	0.989241	1.93399	0.951577	0.262406	1	up	no
50560	u	chr3	.	32647071	32649426	MSTRG.20858.1	1	2356	MSTRG.20858	.	0.637553	0.712197	0.263561	1.72224	0.36611	0.153484	0.231381	0.109211	1.06473	0.037944	2.31825	1.21303	0.2625	1	up	no
14702	i	chr12	+	23623686	23624076	MSTRG.6192.1	1	391	MSTRG.6192	ARHGAP23	5.7305	4.27585	5.12239	2.78823	3.22464	1.22961	1.12303	3.11784	2.52847	2.35582	2.04172	1.02979	0.262684	1	up	no
1582	j	chr1	-	51361984	51428412	MSTRG.696.3	4	13204	MSTRG.696	ENSSSCG00000035593	0.0001	0.323015	0.0001	0.018058	0.0001	0.0001	1.3312	0.220064	0.061868	0.017764	0.209304	-2.25633	0.262788	1	down	no
77660	i	chr7	.	98614602	98615107	MSTRG.31827.1	1	506	MSTRG.31827	JDP2	0.592295	1.41787	1.61604	0.057604	0.290072	1.65567	0.95544	1.70708	2.40321	2.92783	0.411835	-1.27986	0.263289	1	down	no
64535	u	chr6	.	8539420	8555704	MSTRG.26494.1	1	16285	MSTRG.26494	.	1.25143	1.76119	1.93678	1.86283	0.913272	1.12809	0.698498	0.733872	1.33676	0.938259	1.59767	0.675971	0.263509	1	up	no
35784	u	chr16	.	67472594	67480535	MSTRG.15046.1	1	7942	MSTRG.15046	.	0.615285	2.42236	3.19057	1.56702	1.20337	0.633993	0.545556	1.28653	1.48785	1.16295	1.75862	0.81444	0.263714	1	up	no
31071	i	chr15	-	45127511	45166523	MSTRG.13061.1	1	39013	MSTRG.13061	STOX2	0.763319	0.661599	1.3987	1.51272	1.14727	0.999262	2.68948	1.07615	0.544706	3.7516	0.605174	-0.724579	0.2642	1	down	no
71181	x	chr6	+	135390715	135424828	MSTRG.29151.1	2	1775	MSTRG.29151	MIGA1	0.085778	0.332408	0.948726	0.411005	0.993212	1.21567	2.07644	0.982065	1.16856	0.407726	0.47366	-1.07808	0.264294	1	down	no
35804	u	chr16	-	67993900	68009145	MSTRG.15066.1	1	15246	MSTRG.15066	.	0.216052	1.13754	0.114488	0.463463	0.828524	1.27602	0.21475	2.11764	0.548288	1.25256	0.510248	-0.970729	0.264588	1	down	no
35614	u	chr16	.	56408172	56412080	MSTRG.14944.1	1	3909	MSTRG.14944	.	0.261915	0.137623	2.02556	0.742716	1.23065	0.570044	0.252627	0.255515	0.375006	0.605083	2.13697	1.09556	0.26463	1	up	no
29574	i	chr14	.	124084560	124085462	MSTRG.12369.1	1	903	MSTRG.12369	PLEKHS1	0.166291	0.200184	0.602805	0.826555	0.452553	0.461042	1.96481	0.769898	0.429295	1.37674	0.449518	-1.15355	0.2649	1	down	no
83023	i	chr9	-	10262209	10287903	MSTRG.34034.1	2	23237	MSTRG.34034	UVRAG	10.3432	1.27084	1.96166	2.93571	1.95647	1.43797	4.59629	1.57134	1.49712	1.42219	1.75468	0.81121	0.264923	1	up	no
33737	o	chr15	+	130836883	130923748	MSTRG.14095.2	2	5943	MSTRG.14095	ENSSSCG00000040623	0.798283	0.947696	0.925575	0.149845	1.71737	0.896752	1.73809	2.11298	1.90592	1.84792	0.533868	-0.905444	0.264965	1	down	no
64612	i	chr6	.	12037977	12038702	MSTRG.26556.1	1	726	MSTRG.26556	TERF2IP	0.273926	0.383736	0.456913	1.07145	0.728625	0.672826	1.05436	1.26822	1.39524	2.05524	0.452172	-1.14506	0.265111	1	down	no
46735	j	chr2	-	90678942	90680709	MSTRG.19147.1	3	1010	MSTRG.19147	RPS23	81.32	73.4732	15.0604	116.054	119.849	146.803	115.499	145.454	130.531	130.501	0.606705	-0.720933	0.265521	1	down	no
24906	u	chr14	.	18020554	18032804	MSTRG.10486.1	1	12251	MSTRG.10486	.	0.642507	0.392067	2.15369	0.699413	0.535604	0.729935	0.554792	0.170229	0.431675	0.474467	1.8734	0.905658	0.265679	1	up	no
71579	i	chr6	-	148427493	148445711	MSTRG.29337.1	2	7731	MSTRG.29337	ROR1	2.81033	1.92139	5.66908	4.57095	4.36298	2.26807	1.63051	2.69403	3.06424	2.43251	1.59932	0.677457	0.266083	1	up	no
80532	o	chr8	+	76455232	76538220	MSTRG.33013.1	2	9042	MSTRG.33013	FBXW7	2.07732	1.53176	2.07183	2.03463	2.33931	1.0583	1.13274	1.87565	1.16121	0.939223	1.63039	0.705221	0.266328	1	up	no
34965	i	chr16	+	36240786	36246853	MSTRG.14606.1	2	6027	MSTRG.14606	GPBP1	2.71693	1.79491	0.0001	0.0001	0.395592	2.85357	1.89177	4.01078	4.38083	1.34637	0.338847	-1.56129	0.266734	1	down	no
69670	i	chr6	+	87669318	87678233	MSTRG.28553.1	2	6460	MSTRG.28553	PUM1	1.72941	1.21818	1.23829	0.878527	0.973697	3.58746	0.823746	2.19956	1.475	2.76851	0.556288	-0.846096	0.266833	1	down	no
50372	u	chr3	.	27884210	27888738	MSTRG.20769.1	1	4529	MSTRG.20769	.	0.326554	0.370219	0.292551	0.948951	0.511129	0.860229	0.411193	1.74308	1.39965	0.55918	0.492508	-1.02178	0.267363	1	down	no
26261	i	chr14	-	46881497	46886093	MSTRG.11007.2	2	3902	MSTRG.11007	MTMR3	0.0001	0.0001	0.0001	1.46173	0.0001	1.97286	1.6215	2.23445	1.80577	0.0001	0.191511	-2.3845	0.267491	1	down	no
78891	i	chr8	+	11882188	11887987	MSTRG.32357.5	2	5024	MSTRG.32357	LDB2	3.62212	0.0001	3.05964	1.39028	3.75007	1.3276	1.84716	0.644922	0.89561	0.183269	2.4134	1.27107	0.267784	1	up	no
58809	x	chr4	+	115180616	115216221	MSTRG.24130.1	2	1560	MSTRG.24130	ENSSSCG00000036331	0.610307	1.20581	0.325044	0.740946	0.463348	2.31268	0.394089	2.7837	1.52244	0.415729	0.450345	-1.1509	0.26779	1	down	no
9695	i	chr10	-	38505230	38508171	MSTRG.4181.1	1	2942	MSTRG.4181	MOB3B	0.953317	1.2094	3.03557	1.88532	2.17419	0.82	0.659594	1.26134	1.3636	0.804173	1.886	0.915326	0.268036	1	up	no
31494	u	chr15	.	56412906	56414515	MSTRG.13218.1	1	1610	MSTRG.13218	.	0.05174	0.867458	0.174023	0.394872	1.65056	2.09894	0.543726	1.7841	2.28232	0.534137	0.433322	-1.20649	0.268047	1	down	no
54759	u	chr4	+	3711614	3725870	MSTRG.22510.1	2	11714	MSTRG.22510	.	5.45439	3.36117	0.146034	0.129688	0.45039	4.66761	0.977595	5.60428	5.31821	3.96494	0.464707	-1.10561	0.268402	1	down	no
37815	i	chr17	-	42039717	42059104	MSTRG.15908.1	3	16100	MSTRG.15908	DHX35	0.505907	1.38829	2.66522	1.82841	0.51987	1.28023	0.382003	1.2802	0.703519	0.381757	1.71505	0.778247	0.268806	1	up	no
56459	u	chr4	-	75289581	75296294	MSTRG.23276.1	2	5359	MSTRG.23276	.	0.544631	2.15169	0.185391	0.667909	1.09028	3.95431	0.409777	4.05631	0.518286	0.847524	0.474126	-1.07666	0.269255	1	down	no
40551	i	chr18	-	48981537	48982816	MSTRG.17020.1	1	1280	MSTRG.17020	TNS3	3.3347	2.36769	1.03594	1.65728	2.03086	1.21338	0.949124	1.13677	1.15061	0.90923	1.94556	0.960186	0.269798	1	up	no
21399	u	chr13	.	112050833	112052540	MSTRG.9016.1	1	1708	MSTRG.9016	.	3.63917	0.046425	0.071875	0.132989	0.344268	0.254058	0.694008	0.317652	0.199119	0.125295	2.66313	1.41312	0.269848	1	up	no
26635	i	chr14	-	50085654	50118171	MSTRG.11132.3	2	6772	MSTRG.11132	MAPK1	2.4742	1.97069	2.02099	0.0001	1.80895	0.0001	0.0001	0.0001	0.0001	1.60038	5.16931	2.36997	0.26993	1	up	no
82990	o	chr9	+	9934172	9993618	MSTRG.34019.2	2	3931	MSTRG.34019	ENSSSCG00000014861	0.0001	0.102325	0.0001	0.147822	0.0001	1.32718	0.0001	0.446326	0.0001	0.0001	0.141192	-2.82427	0.270049	1	down	no
47537	i	chr2	+	129956932	130017894	MSTRG.19526.1	4	47489	MSTRG.19526	MARCH3	2.18772	2.25606	3.76298	3.44731	3.57086	2.04017	2.0373	2.27047	2.151	1.40375	1.53745	0.620543	0.270901	1	up	no
13484	i	chr12	.	6707540	6709220	MSTRG.5796.1	1	1681	MSTRG.5796	GPRC5C	0.487338	0.33128	0.923276	0.886951	0.39427	0.311129	1.90952	0.597812	0.869946	2.60249	0.480554	-1.05723	0.271352	1	down	no
9792	u	chr10	-	39893607	39932550	MSTRG.4219.4	5	10704	MSTRG.4219	.	0.823312	0.614552	1.27046	1.04574	1.13817	1.27698	0.708438	2.90862	2.32868	1.19185	0.581402	-0.782392	0.271741	1	down	no
44719	o	chr2	-	66506266	66537001	MSTRG.18422.1	2	4198	MSTRG.18422	ENSSSCG00000022634	0.624982	0.829857	2.81616	0.599821	0.936047	0.898564	0.553587	0.618414	0.46006	0.443867	1.95222	0.965118	0.272045	1	up	no
39898	u	chr18	.	26508494	26517016	MSTRG.16713.1	1	8523	MSTRG.16713	.	0.305591	0.315732	0.116618	0.253144	0.270256	0.142187	1.91388	0.221816	0.110972	0.226461	0.48229	-1.05203	0.272254	1	down	no
71596	u	chr6	+	148749814	148761771	MSTRG.29348.1	2	11712	MSTRG.29348	.	4.3471	3.09733	8.74591	7.52459	6.59571	3.54952	2.87957	3.70242	4.91894	4.3498	1.56238	0.643749	0.272285	1	up	no
9822	i	chr10	-	39962264	39976139	MSTRG.4219.14	2	13324	MSTRG.4219	WAC	3.64984	4.55232	6.0178	4.8424	4.55667	2.15437	1.81945	2.57143	4.89122	3.77737	1.55247	0.634565	0.27235	1	up	no
2297	i	chr1	+	86449964	86451268	MSTRG.1018.1	1	1305	MSTRG.1018	SH3BGRL2	0.549178	0.830876	0.992212	0.968444	1.14597	1.41875	2.02103	2.35675	0.897837	2.22104	0.50325	-0.990653	0.272809	1	down	no
50375	x	chr3	-	27928353	28177352	MSTRG.20772.1	3	3747	MSTRG.20772	RF00026	0.604632	0.401754	0.318444	1.4484	0.882494	1.62309	0.708479	1.89488	1.96124	1.00587	0.508195	-0.976546	0.273026	1	down	no
75139	x	chr7	+	46540042	46574711	MSTRG.30801.1	2	2282	MSTRG.30801	GSTA2	5.58525	21.4085	0.507053	6.87062	4.98135	0.745351	49.8343	1.97396	23.0775	6.4577	0.479393	-1.06072	0.273278	1	down	no
68523	u	chr6	+	69600416	69602670	MSTRG.28106.1	2	1635	MSTRG.28106	.	1.25912	0.323226	1.34757	1.83565	0.559792	1.95056	1.90258	1.33055	2.65614	2.84484	0.498411	-1.00459	0.273606	1	down	no
35628	u	chr16	.	56762188	56763091	MSTRG.14958.1	1	904	MSTRG.14958	.	0.187729	0.0001	1.93586	0.507948	1.75906	0.586682	0.146135	0.081735	0.325464	0.426113	2.80353	1.48725	0.273791	1	up	no
61948	i	chr5	+	46196004	46219657	MSTRG.25340.1	2	21323	MSTRG.25340	PPFIBP1	0.023999	0.070994	0.423506	0.187283	0.253017	0.011153	0.067059	0.075639	0.224487	0.057757	2.1986	1.13659	0.273818	1	up	no
54805	i	chr4	-	7818955	7832637	MSTRG.22550.1	2	9540	MSTRG.22550	ST3GAL1	3.05522	2.83814	1.38403	1.80954	1.81326	1.32497	1.50724	1.56545	1.31658	1.09268	1.60134	0.67928	0.273865	1	up	no
33612	i	chr15	+	125758690	125766183	MSTRG.14059.2	2	6209	MSTRG.14059	SERPINE2	4.04294	9.58819	0.323105	2.38089	5.23598	1.65621	0.619579	2.68726	5.17373	2.01134	1.77567	0.828367	0.274043	1	up	no
86853	u	chr9	.	128397635	128398246	MSTRG.35549.1	1	612	MSTRG.35549	.	0.886139	0.24399	0.055056	0.810827	0.662041	1.95796	0.73969	2.75118	0.613681	0.489054	0.405713	-1.30147	0.274756	1	down	no
70692	i	chr6	-	108130364	108136649	MSTRG.28967.1	1	6286	MSTRG.28967	CABLES1	0.505254	0.720663	0.921514	0.909969	0.742641	2.02223	0.366612	2.70378	0.935233	1.12673	0.531134	-0.912853	0.274839	1	down	no
80604	i	chr8	-	77981046	77994130	MSTRG.33044.2	2	11045	MSTRG.33044	LRBA	1.01072	0.986331	1.11346	1.13884	1.07677	1.34618	2.38796	1.13768	1.29488	2.49887	0.61463	-0.702209	0.274936	1	down	no
64537	u	chr6	-	8569939	8579666	MSTRG.26496.1	2	4816	MSTRG.26496	.	1.28518	2.08791	2.18963	1.60281	1.059	1.21711	0.818465	0.708888	1.14234	0.753416	1.77245	0.825742	0.275947	1	up	no
79227	x	chr8	-	30878408	30901848	MSTRG.32526.4	2	958	MSTRG.32526	UBE2K	4.8143	0.0001	0.2572	0.749647	0.006472	0.0001	0.0001	1.19094	0.0001	0.012754	4.84032	2.2751	0.276154	1	up	no
73033	u	chr7	.	12147069	12148608	MSTRG.29971.1	1	1540	MSTRG.29971	.	0.333821	0.364373	0.406946	0.623152	0.532933	1.72173	0.771441	0.916719	0.286577	1.14315	0.467233	-1.09779	0.276158	1	down	no
86581	u	chr9	+	120738682	120746451	MSTRG.35434.2	2	3793	MSTRG.35434	.	0.055621	0.237377	0.0001	0.082815	0.0001	0.0001	0.0001	1.31849	0.0001	0.83554	0.174538	-2.51839	0.276196	1	down	no
35807	u	chr16	.	68034837	68037168	MSTRG.15069.1	1	2332	MSTRG.15069	.	0.312778	1.07017	0.126118	0.394022	0.607562	1.43172	0.186555	1.84738	0.363285	1.7751	0.448008	-1.1584	0.276203	1	down	no
45094	j	chr2	-	70192588	70199864	MSTRG.18536.2	5	2148	MSTRG.18536	ELOF1	1.62562	2.84908	0.0001	0.729329	0.30279	0.857239	0.28865	0.293775	0.195355	0.600727	2.46313	1.30049	0.276641	1	up	no
55181	i	chr4	+	20669711	20742076	MSTRG.22724.2	3	61247	MSTRG.22724	EXT1	3.01051	1.34209	2.72902	2.86223	3.71214	3.43696	3.75825	2.79465	7.24539	4.23909	0.635921	-0.65308	0.276651	1	down	no
9044	i	chr10	-	22777134	22796459	MSTRG.3906.4	2	2568	MSTRG.3906	NR5A2	18.1628	0.225861	0.0001	1.75458	0.087068	0.027277	4.10909	0.964968	1.07349	0.029606	3.26064	1.70515	0.276753	1	up	no
90532	u	chrY	-	7146611	7155810	MSTRG.37048.1	1	9200	MSTRG.37048	.	14.0674	1.37697	0.880941	1.51329	0.508387	1.11665	5.23285	0.87638	0.917714	0.994814	2.00768	1.00553	0.276764	1	up	no
71576	x	chr6	+	148412119	148425266	MSTRG.29335.1	2	11636	MSTRG.29335	RF00026	1.8692	1.71986	3.97304	3.30818	3.07024	1.78462	1.17052	1.95681	2.21221	1.76605	1.56808	0.648995	0.276834	1	up	no
31475	o	chr15	-	56204026	56282323	MSTRG.13221.1	2	25284	MSTRG.13221	RF00408	0.453532	7.70403	3.39046	3.44246	3.44965	0.20039	0.220029	2.60851	4.53187	2.4342	1.84494	0.883571	0.277631	1	up	no
70610	i	chr6	-	106632036	106645279	MSTRG.28949.1	2	11805	MSTRG.28949	GREB1L	0.0001	0.007523	0.0001	0.397046	0.0001	1.20121	0.0001	0.387386	0.678621	0.0001	0.17856	-2.48552	0.277686	1	down	no
80248	o	chr8	+	70055140	70147592	MSTRG.32902.4	2	1193	MSTRG.32902	ENSSSCG00000008954	0.652196	0.049519	0.431595	0.690638	0.822915	0.243145	1.3209	1.76701	0.356884	2.40252	0.434592	-1.20227	0.278475	1	down	no
28981	i	chr14	.	110388739	110389430	MSTRG.12151.1	1	692	MSTRG.12151	HPSE2	1.11322	1.73285	2.51232	1.59571	0.520475	1.34605	0.12727	0.804225	0.560414	0.641317	2.14831	1.10321	0.278713	1	up	no
63876	x	chr5	+	94282346	94343380	MSTRG.26125.1	2	1008	MSTRG.26125	TMTC3	0.0001	2.21718	2.5902	1.61694	0.798491	1.81946	0.0001	0.0001	0.048747	0.105096	3.65994	1.87182	0.278748	1	up	no
65741	u	chr6	-	38709752	38724699	MSTRG.27055.1	1	14948	MSTRG.27055	.	0.449497	2.47863	0.229115	0.596217	2.61278	0.980542	0.048221	1.13791	0.860205	0.36937	1.87449	0.9065	0.278821	1	up	no
19952	o	chr13	+	66155010	66158741	MSTRG.8410.2	2	2205	MSTRG.8410	JAGN1	1.8714	0.826476	1.67034	1.33043	1.04837	0.849141	0.941932	0.032801	1.03767	0.309918	2.12742	1.0891	0.278903	1	up	no
24296	i	chr14	+	251670	258693	MSTRG.10202.1	2	4650	MSTRG.10202	SPIN1	0.527878	0.785179	0.542965	0.486114	0.473947	0.602215	1.49576	0.546761	2.2006	0.595226	0.517609	-0.950065	0.278996	1	down	no
68457	i	chr6	+	68426877	68427868	MSTRG.28096.1	1	992	MSTRG.28096	CAMTA1	0.582188	1.30252	1.76448	0.760294	0.846462	0.588584	0.335448	0.742029	0.450437	0.390302	2.09667	1.0681	0.279382	1	up	no
76297	i	chr7	.	72815317	72826057	MSTRG.31307.1	1	10741	MSTRG.31307	NOVA1	0.417577	2.16673	1.50596	1.13314	1.88266	3.7905	1.0308	2.84583	2.34834	1.95567	0.593599	-0.752439	0.279431	1	down	no
24387	u	chr14	-	3903424	4013655	MSTRG.10250.1	8	2003	MSTRG.10250	.	1.72889	1.53504	4.27998	2.08564	1.25786	1.04357	0.634371	0.8887	1.5276	1.63043	1.90184	0.927397	0.279492	1	up	no
35780	u	chr16	.	67393430	67401736	MSTRG.15042.1	1	8307	MSTRG.15042	.	0.485263	1.83519	2.85973	1.08546	0.869194	0.563635	0.456751	1.16641	1.04156	0.837058	1.75501	0.811479	0.2802	1	up	no
24629	i	chr14	-	10480940	10486593	MSTRG.10361.2	2	5629	MSTRG.10361	DPYSL2	1.55635	0.010363	0.0001	0.045839	0.0001	1.47144	1.0376	2.20513	1.77754	0.0001	0.248428	-2.0091	0.280283	1	down	no
9805	u	chr10	-	39922600	39932532	MSTRG.4219.13	2	8746	MSTRG.4219	.	0.103919	0.619906	0.0001	0.0001	0.893883	1.25651	1.08332	0.331581	0.214632	1.681	0.354257	-1.49713	0.280833	1	down	no
60777	i	chr5	.	19259726	19261646	MSTRG.24906.1	1	1921	MSTRG.24906	HOXC4	0.996563	0.595519	1.7423	0.738254	0.602653	0.339989	0.235572	0.59696	0.735706	0.449164	1.98325	0.987866	0.280925	1	up	no
83345	o	chr9	+	21751855	21758928	MSTRG.34141.2	2	3254	MSTRG.34141	ENSSSCG00000038831	0.0001	0.974244	0.0001	3.2267	1.52461	1.32753	28.3849	0.0001	0.0001	0.0001	0.192704	-2.37554	0.281528	1	down	no
35057	u	chr16	.	39170547	39171370	MSTRG.14675.1	1	824	MSTRG.14675	.	0.263938	0.495533	0.197588	0.167931	0.364674	0.051251	1.67411	0.179342	0.209338	1.44573	0.418472	-1.2568	0.281534	1	down	no
35616	u	chr16	.	56421590	56422644	MSTRG.14946.1	1	1055	MSTRG.14946	.	0.246141	0.0001	2.01777	0.939786	1.44857	0.433998	0.332438	0.326838	0.231193	0.445112	2.62908	1.39456	0.281602	1	up	no
29866	i	chr14	.	132487599	132488140	MSTRG.12494.1	1	542	MSTRG.12494	ENSSSCG00000010719	0.718956	2.55827	3.13982	2.06111	2.57235	1.88986	0.473936	0.606699	1.81135	0.384479	2.13895	1.0969	0.281809	1	up	no
67791	o	chr6	+	59742633	59764373	MSTRG.27835.2	3	507	MSTRG.27835	ZNF580	1.89568	2.84238	0.939262	1.22514	0.666607	0.067569	1.32915	1.33692	9.62326	6.05937	0.410999	-1.28279	0.281833	1	down	no
86869	u	chr9	-	129103405	129108236	MSTRG.35559.1	2	2434	MSTRG.35559	.	1.6046	1.51224	1.44664	0.497916	1.58334	0.482506	1.23666	0.679026	0.287249	0.623814	2.00793	1.00571	0.281882	1	up	no
20822	o	chr13	-	89820408	89890668	MSTRG.8763.3	4	23117	MSTRG.8763	WWTR1	0.572431	1.14616	1.46957	1.01475	1.07633	0.162768	0.500016	0.680803	0.595456	1.23571	1.66288	0.733688	0.282172	1	up	no
28912	i	chr14	+	108887762	108906234	MSTRG.12119.1	2	9587	MSTRG.12119	UBTD1	0.264876	0.141468	1.36879	0.393128	0.313924	0.175039	0.217159	0.236715	0.182869	0.42965	1.99945	0.999604	0.282238	1	up	no
62796	u	chr5	.	65574654	65579384	MSTRG.25673.1	1	4731	MSTRG.25673	.	0.435963	0.436448	0.025948	0.626329	0.326524	0.232049	3.68505	0.595035	0.043475	0.009047	0.405553	-1.30204	0.282335	1	down	no
56845	i	chr4	+	86037440	86057373	MSTRG.23452.1	3	15636	MSTRG.23452	PBX1	0.070231	0.277186	0.039439	0.068735	0.271589	0.0001	0.108752	0.0001	0.0001	0.100507	3.47005	1.79496	0.282453	1	up	no
36833	u	chr17	-	27378072	27385026	MSTRG.15483.1	1	6955	MSTRG.15483	.	3.13384	0.621727	3.63985	2.00985	1.35997	1.16336	0.63573	1.34486	2.22998	0.925973	1.7088	0.77298	0.282835	1	up	no
81970	i	chr8	.	132974711	132976443	MSTRG.33650.1	1	1733	MSTRG.33650	ARHGAP24	0.40021	0.460884	0.860405	1.27728	0.681785	1.47187	2.0965	1.63711	1.05165	0.946736	0.510914	-0.968847	0.28303	1	down	no
24299	u	chr14	.	298189	298997	MSTRG.10204.1	1	809	MSTRG.10204	.	0.596531	0.204667	0.714603	1.11905	0.859334	1.13257	1.04733	1.8664	1.53998	1.85733	0.469422	-1.09104	0.283111	1	down	no
15926	o	chr12	-	45063166	45071782	MSTRG.6705.2	2	7708	MSTRG.6705	RF00026	0.0001	0.0001	0.0001	0.0001	1.23646	0.505687	1.67519	2.56679	1.33949	0.0001	0.203189	-2.29911	0.284008	1	down	no
47170	u	chr2	+	116403554	116418853	MSTRG.19333.1	2	12852	MSTRG.19333	.	1.64272	1.47405	2.9811	2.19472	1.3989	1.22063	0.621482	1.12415	1.94781	1.24565	1.57337	0.653854	0.284081	1	up	no
1410	u	chr1	-	41754125	41757218	MSTRG.611.1	2	2959	MSTRG.611	.	2.23356	0.10141	0.057847	0.118921	0.0001	0.064541	0.429411	0.141859	0.116538	0.0001	3.33822	1.73908	0.284213	1	up	no
8621	u	chr10	+	13563782	13602540	MSTRG.3709.6	3	7108	MSTRG.3709	.	0.0001	0.968523	0.0001	0.0001	0.83041	2.20708	1.68234	0.0001	1.32353	1.9585	0.250885	-1.9949	0.284377	1	down	no
25398	i	chr14	+	30613186	30640703	MSTRG.10693.3	1	27518	MSTRG.10693	MLXIP	2.65063	1.522	4.56398	4.22064	3.13837	1.70347	0.987751	3.71868	1.03921	2.74931	1.57825	0.658322	0.284422	1	up	no
620	i	chr1	+	14721288	14750690	MSTRG.282.1	2	6350	MSTRG.282	CCDC170	0.112208	0.003408	0.288405	0.0001	1.83632	0.356734	0.050156	0.0001	0.0001	0.161194	3.94247	1.9791	0.284458	1	up	no
62795	u	chr5	-	65570286	65591693	MSTRG.25672.1	2	4363	MSTRG.25672	.	0.240456	0.361395	0.043343	0.57961	0.249933	0.264906	3.19752	0.370795	0.038414	0.0001	0.380898	-1.39252	0.284597	1	down	no
56523	u	chr4	-	77592438	77593765	MSTRG.23306.1	1	1328	MSTRG.23306	.	0.0001	0.0001	0.0001	0.0001	1.17875	1.82612	1.02946	0.0001	1.6044	1.12086	0.211281	-2.24276	0.284726	1	down	no
1130	u	chr1	.	31531277	31532878	MSTRG.494.1	1	1602	MSTRG.494	.	0.805546	1.31451	0.651632	0.546068	1.07219	2.05489	1.49165	1.54539	1.28341	2.20842	0.511426	-0.967403	0.285162	1	down	no
38166	u	chr17	-	50139181	50149685	MSTRG.16048.3	2	8853	MSTRG.16048	.	0.629983	0.359085	0.175703	0.436734	0.0001	0.0001	0.0001	0.0001	0.351198	0.0001	4.55522	2.18752	0.285325	1	up	no
35813	u	chr16	.	68089102	68101302	MSTRG.15016.1	1	12201	MSTRG.15016	.	0.17782	1.13286	0.203188	0.483438	0.875965	1.50779	0.283998	2.03439	0.385967	1.263	0.524785	-0.930203	0.285957	1	down	no
64912	i	chr6	+	17381692	17427502	MSTRG.26678.1	2	15757	MSTRG.26678	NFAT5	1.11163	2.95296	4.35737	2.74658	3.90041	1.1135	2.79878	3.30004	1.25558	0.553339	1.67039	0.740181	0.285971	1	up	no
22609	i	chr13	-	141176943	141177983	MSTRG.9515.1	1	1041	MSTRG.9515	IGSF11	0.334986	3.4525	0.165433	0.728896	0.712996	0.39279	0.138904	1.16838	0.563361	0.060506	2.32141	1.215	0.286112	1	up	no
23280	u	chr13	+	164639259	164651071	MSTRG.9816.1	1	11813	MSTRG.9816	.	0.055442	2.53537	0.032311	0.181661	1.21141	0.400362	0.414833	3.94312	3.37216	0.882361	0.445608	-1.16615	0.286527	1	down	no
36599	u	chr17	-	15029663	15065002	MSTRG.15372.2	2	14608	MSTRG.15372	.	0.304774	0.26893	0.280975	0.321859	0.2665	0.184509	0.476408	0.339852	1.54974	0.205406	0.523614	-0.933424	0.286657	1	down	no
24907	u	chr14	.	18034785	18037118	MSTRG.10487.1	1	2334	MSTRG.10487	.	0.698993	0.570325	1.92215	0.629573	0.45516	0.782274	0.492815	0.069377	0.376077	0.330603	2.08479	1.0599	0.286987	1	up	no
9687	i	chr10	-	38446323	38447643	MSTRG.4173.1	1	1321	MSTRG.4173	MOB3B	1.17066	2.00672	4.92826	3.90258	4.75483	1.52284	1.18457	2.23048	2.44812	1.47869	1.89099	0.91914	0.287023	1	up	no
46014	i	chr2	-	78358905	78360748	MSTRG.18874.1	1	1844	MSTRG.18874	MAPK9	3.32004	3.29865	3.10499	0.0001	3.54705	0.0001	0.0001	0.0001	0.0001	2.75328	4.81931	2.26883	0.287048	1	up	no
54766	u	chr4	+	3959949	3963450	MSTRG.22514.2	2	935	MSTRG.22514	.	3.48469	1.55344	1.22479	0.141658	3.03817	0.214377	0.198982	1.16172	2.40089	0.315244	2.20048	1.13782	0.287208	1	up	no
33643	u	chr15	-	128182691	128230916	MSTRG.14068.3	3	16170	MSTRG.14068	.	0.227786	0.503705	0.96757	2.53667	0.59824	0.680347	0.16308	1.17088	0.135302	0.473563	1.8428	0.881896	0.288191	1	up	no
74483	j	chr7	+	32289459	32305252	MSTRG.30542.2	7	10547	MSTRG.30542	SRSF3	1.46049	2.19439	7.70415	2.35887	2.23571	10.121	1.81254	2.84804	3.44036	8.8158	0.590049	-0.761094	0.288665	1	down	no
35792	u	chr16	.	67840353	67842888	MSTRG.15054.1	1	2536	MSTRG.15054	.	0.188095	1.07974	0.094138	0.413287	0.543342	1.46892	0.217052	1.96929	0.519865	0.913645	0.455632	-1.13406	0.288948	1	down	no
19476	u	chr13	+	46599665	46605647	MSTRG.8217.1	1	5983	MSTRG.8217	.	0.265188	0.640801	2.29461	0.890434	0.239114	0.383498	0.525933	0.508677	0.502008	0.281532	1.96677	0.975832	0.289053	1	up	no
53119	j	chr3	-	93970551	94008223	MSTRG.21883.2	4	4532	MSTRG.21883	RHOQ	1.08082	0.658099	1.23049	0.511293	0.446039	0.414186	3.3915	2.45419	0.71649	0.543479	0.522182	-0.937374	0.289232	1	down	no
4562	i	chr1	+	159558601	159580795	MSTRG.1925.1	2	22169	MSTRG.1925	RNF152	4.70057	0.732524	0.760264	1.63859	0.962069	0.652402	2.09073	0.801854	0.807414	0.803086	1.70576	0.770413	0.289333	1	up	no
31063	u	chr15	.	45075191	45077598	MSTRG.13055.1	1	2408	MSTRG.13055	.	0.348323	0.252837	0.676637	0.740539	0.313824	0.751063	1.23237	0.37489	0.282979	2.07229	0.494773	-1.01516	0.289618	1	down	no
56213	i	chr4	+	65649875	65653277	MSTRG.23163.1	1	3403	MSTRG.23163	SULF1	0.867835	1.26715	1.06145	0.852071	0.721807	2.66599	0.697671	2.78304	0.570092	2.40615	0.522891	-0.935416	0.289676	1	down	no
40761	i	chr18	+	54256799	54258698	MSTRG.17120.1	2	1402	MSTRG.17120	SUGCT	2.03524	2.0026	2.64079	2.08294	1.43435	1.60498	0.177619	1.86761	0.335822	1.20583	1.96383	0.973669	0.289822	1	up	no
5614	i	chr1	-	194523321	194533708	MSTRG.2408.1	2	8442	MSTRG.2408	PPP2R5E	0.122064	0.008436	0.016653	0.037556	0.214469	0.187843	0.198651	0.212561	0.004837	0.367439	0.41096	-1.28293	0.289928	1	down	no
61456	u	chr5	+	31178304	31303896	MSTRG.25170.2	3	36920	MSTRG.25170	.	2.45158	4.02438	2.32497	2.29986	3.90572	1.4883	1.82777	1.95055	2.31792	2.3354	1.51276	0.597185	0.290035	1	up	no
24911	u	chr14	.	18066461	18073449	MSTRG.10491.1	1	6989	MSTRG.10491	.	0.867004	0.451909	1.93928	0.839522	0.645667	0.719146	0.671759	0.175178	0.51646	0.45081	1.87237	0.904869	0.290225	1	up	no
45296	x	chr2	-	71895794	71896537	MSTRG.18619.1	2	297	MSTRG.18619	INSR	0.035311	3.58279	0.143859	0.285865	3.10592	1.18272	0.024342	0.145953	0.25244	0.933114	2.81802	1.49468	0.290532	1	up	no
27685	u	chr14	-	74072388	74080112	MSTRG.11588.1	1	7725	MSTRG.11588	.	0.768135	0.937677	1.04537	0.535416	2.26886	0.61161	0.182877	0.852835	0.767216	0.701586	1.78281	0.834154	0.290621	1	up	no
9690	i	chr10	+	38474508	38481154	MSTRG.4176.1	2	5460	MSTRG.4176	MOB3B	0.961436	1.67202	3.33053	2.46236	3.10463	1.24131	0.625388	1.46063	2.24533	1.22133	1.69723	0.763183	0.290783	1	up	no
44589	j	chr2	-	65342498	65346694	MSTRG.18384.1	4	1388	MSTRG.18384	C19orf53	4.40412	1.928	1.1773	2.04822	5.27658	2.13777	0.39515	1.4039	0.481678	3.11875	1.96812	0.976819	0.290967	1	up	no
23504	i	chr13	-	182400623	182405390	MSTRG.9887.1	2	4644	MSTRG.9887	C21orf91	0.0001	1.32007	1.0068	0.0001	0.989996	2.38608	1.08255	1.66277	2.50754	1.22294	0.374306	-1.41771	0.291198	1	down	no
6737	i	chr1	-	239397620	239411071	MSTRG.2903.1	1	13452	MSTRG.2903	TMOD1	1.38624	0.802805	7.17698	2.72143	3.2722	0.985031	0.976473	2.24822	2.675	2.35035	1.66319	0.733951	0.291406	1	up	no
18119	u	chr13	-	26334715	26339376	MSTRG.7686.1	1	4662	MSTRG.7686	.	0.601833	0.486765	1.16539	1.87095	2.1175	0.869391	0.669097	0.389335	0.232563	1.08157	1.92552	0.945246	0.291722	1	up	no
2565	i	chr1	-	97897945	97899064	MSTRG.1131.1	1	1120	MSTRG.1131	ZBTB7C	18.0884	0.304894	0.973267	2.2915	0.933752	0.72099	6.18705	0.695904	0.566489	1.25093	2.39794	1.26179	0.291747	1	up	no
72997	u	chr7	.	10766337	10769834	MSTRG.29963.1	1	3498	MSTRG.29963	.	0.04887	1.93168	0.167062	0.05234	0.209127	0.144531	0.137405	0.136127	0.322235	0.305634	2.30328	1.20369	0.291818	1	up	no
59005	i	chr4	+	122238489	122244294	MSTRG.24218.2	2	5524	MSTRG.24218	ENSSSCG00000039854	11.962	4.10357	0.560417	1.71203	2.4373	2.35847	2.44406	2.08394	4.18099	0.926971	1.73208	0.792504	0.291881	1	up	no
35287	j	chr16	+	47394717	47405347	MSTRG.14786.2	4	3025	MSTRG.14786	MRPS36	0.615542	0.718803	0.242926	0.063813	0.25491	0.814235	1.55929	0.089063	0.575998	1.02502	0.466579	-1.09981	0.292188	1	down	no
30956	i	chr15	-	38001182	38004618	MSTRG.13006.1	2	1491	MSTRG.13006	ENSSSCG00000020934	0.695222	0.401579	1.6982	0.495063	0.429123	0.435778	0.189354	0.385808	0.580503	0.183949	2.09486	1.06685	0.292363	1	up	no
69491	i	chr6	-	84684992	84693947	MSTRG.28488.1	2	5804	MSTRG.28488	WASF2	0.379268	0.245104	0.382458	0.283621	0.425674	0.351946	0.578672	1.64421	0.404474	0.377068	0.511304	-0.967748	0.292432	1	down	no
72884	u	chr7	.	6818416	6818983	MSTRG.29913.1	1	568	MSTRG.29913	.	0.0001	1.77177	1.20313	2.1739	1.00839	0.122511	0.0001	0.34505	1.03868	0.647985	2.85811	1.51506	0.292581	1	up	no
77031	u	chr7	-	83177437	83193628	MSTRG.31531.1	1	16192	MSTRG.31531	.	1.73022	1.82536	3.36918	2.73417	1.61448	0.397617	1.7056	1.10833	2.57984	1.1745	1.61838	0.694546	0.292693	1	up	no
2902	i	chr1	+	108491732	108500532	MSTRG.1274.2	2	8779	MSTRG.1274	ENSSSCG00000028737	0.074258	2.89312	0.0001	0.0001	0.03772	2.73663	2.02642	3.39667	3.01802	0.0001	0.268862	-1.89506	0.292944	1	down	no
5904	i	chr1	-	205925432	205941211	MSTRG.2533.2	2	14606	MSTRG.2533	BNC2	0.0001	0.0001	4.14641	5.48137	6.20225	0.051708	0.0001	2.14921	1.48323	0.0001	4.29661	2.1032	0.293154	1	up	no
23281	u	chr13	-	164651146	164664219	MSTRG.9817.1	1	13074	MSTRG.9817	.	0.071499	3.62161	0.059549	0.203168	1.46591	0.476997	0.464927	5.08853	4.78856	1.12855	0.453793	-1.13989	0.293297	1	down	no
59652	o	chr5	+	3912604	3934726	MSTRG.24482.1	2	6621	MSTRG.24482	RF00026	2.2205	1.60599	6.5214	2.81678	3.16229	1.86816	0.759738	1.64362	2.50529	3.21716	1.63368	0.708126	0.29336	1	up	no
63166	i	chr5	-	73797957	73815022	MSTRG.25828.1	2	13533	MSTRG.25828	PRICKLE1	1.23825	1.31568	1.91579	1.28166	0.690191	1.03505	2.81021	1.74477	1.56743	3.08731	0.628767	-0.669402	0.293368	1	down	no
23273	u	chr13	.	164339607	164340257	MSTRG.9810.1	1	651	MSTRG.9810	.	0.0001	0.080036	0.094689	0.0001	0.704508	0.072049	0.083774	1.31304	1.69892	0.0001	0.277609	-1.84887	0.294335	1	down	no
69493	u	chr6	-	84728939	84733195	MSTRG.28490.1	2	3583	MSTRG.28490	.	0.267309	0.424377	0.35111	0.395873	0.476311	0.445993	0.421742	0.383007	0.537267	2.01845	0.503087	-0.99112	0.294373	1	down	no
18734	x	chr13	-	32473198	32484261	MSTRG.7905.1	2	3612	MSTRG.7905	RBM6	4.54522	3.3154	5.64023	4.9294	4.12141	5.30889	0.393644	0.639218	5.69249	0.529698	1.79495	0.843945	0.294453	1	up	no
74766	i	chr7	+	37866905	37875003	MSTRG.30664.1	2	6905	MSTRG.30664	BICRAL	0.424308	2.14736	0.800814	1.52429	0.127722	1.35796	1.74007	2.84046	1.8957	1.44888	0.541254	-0.885622	0.294483	1	down	no
7094	i	chr1	-	251104230	251116407	MSTRG.3050.2	2	12150	MSTRG.3050	PALM2	0.0001	0.063831	0.0001	0.089575	2.12427	0.0001	0.0001	0.222307	0.220445	0.0001	5.14134	2.36214	0.294582	1	up	no
42535	i	chr2	+	15076282	15081334	MSTRG.17634.1	1	5053	MSTRG.17634	CELF1	0.179671	0.259287	1.20219	0.684816	0.205554	0.43209	2.61218	0.4508	0.187118	1.30783	0.507315	-0.979046	0.295306	1	down	no
67974	i	chr6	.	61859239	61859838	MSTRG.27895.1	1	600	MSTRG.27895	ENSSSCG00000032196	0.0001	0.0001	1.45327	0.0001	1.10515	1.42136	2.19995	1.43454	1.77999	1.06319	0.323928	-1.62625	0.296077	1	down	no
35791	u	chr16	.	67808906	67818347	MSTRG.15053.1	1	9442	MSTRG.15053	.	0.222551	0.960012	0.080647	0.32437	0.562494	1.26863	0.156286	1.78039	0.327786	0.808275	0.495252	-1.01376	0.297025	1	down	no
90538	u	chrY	-	7240528	7265044	MSTRG.37054.1	2	3107	MSTRG.37054	.	10.234	0.857615	0.559943	0.855569	0.507863	1.04689	3.57799	0.490827	0.430804	0.459147	2.16711	1.11578	0.297116	1	up	no
62786	o	chr5	+	65472476	65489190	MSTRG.25663.1	3	5143	MSTRG.25663	ssc-mir-9813	0.307994	0.455816	0.009548	0.443888	0.185057	0.372997	2.41612	0.573836	0.032463	0.008322	0.411989	-1.27932	0.297477	1	down	no
14942	x	chr12	-	26731896	26733606	MSTRG.6301.1	2	1258	MSTRG.6301	ACSF2	0.004874	0.0001	0.820235	0.0001	1.63312	1.43444	1.95937	1.6974	0.018708	2.5113	0.322577	-1.63228	0.297484	1	down	no
68474	i	chr6	+	68674088	68682336	MSTRG.28103.1	1	8249	MSTRG.28103	ERRFI1	2.3337	5.70097	3.91719	5.10067	5.70733	2.77063	2.2862	5.5379	2.69564	1.25373	1.56489	0.646059	0.297582	1	up	no
4059	i	chr1	-	134110913	134127489	MSTRG.1735.1	1	16577	MSTRG.1735	MEIS2	3.56016	5.01638	2.89575	4.39108	5.03501	1.79285	2.39209	2.07165	3.46914	4.00815	1.52167	0.605653	0.297679	1	up	no
78903	i	chr8	-	12352735	12367418	MSTRG.32338.1	2	14141	MSTRG.32338	QDPR	0.622137	1.1164	0.60862	2.23546	0.857008	2.38537	0.685432	2.37607	1.69222	1.85632	0.60471	-0.725684	0.297697	1	down	no
31196	i	chr15	+	47592601	47594253	MSTRG.13101.1	1	1653	MSTRG.13101	ADAM9	1.5871	1.51601	2.30362	1.55953	2.02917	0.950543	1.00324	1.09911	1.17008	0.57974	1.87299	0.905344	0.297785	1	up	no
21407	u	chr13	.	112322018	112345029	MSTRG.9024.1	1	23012	MSTRG.9024	.	3.06007	0.103135	0.157794	0.202257	0.198119	0.181487	0.980857	0.171095	0.249994	0.242767	2.03777	1.02699	0.297872	1	up	no
48399	i	chr2	.	148227878	148229097	MSTRG.19873.1	1	1220	MSTRG.19873	ENSSSCG00000031406	0.126007	0.280027	0.378806	0.471346	0.295087	0.222966	1.79193	0.128002	0.171221	1.09627	0.454867	-1.13648	0.299063	1	down	no
8957	i	chr10	+	19871812	19881006	MSTRG.3808.1	1	9195	MSTRG.3808	TP53BP2	3.72742	1.49459	2.25969	2.75815	1.67745	1.51602	1.60226	1.70362	1.58306	1.2375	1.55936	0.64095	0.299098	1	up	no
23685	j	chr13	+	195326519	195335489	MSTRG.9962.1	5	909	MSTRG.9962	SOD1	41.3469	23.1372	15.8267	23.0637	21.7973	25.9602	105.22	21.6387	24.7571	24.7626	0.618625	-0.692864	0.299145	1	down	no
35059	u	chr16	.	39177748	39185512	MSTRG.14677.1	1	7765	MSTRG.14677	.	0.301979	0.396086	0.708408	0.20567	0.270073	0.245815	1.27455	0.222571	0.130253	1.80397	0.511867	-0.966159	0.299287	1	down	no
59699	i	chr5	.	5250289	5253727	MSTRG.24501.1	1	3439	MSTRG.24501	ENSSSCG00000031417	1.08118	0.606204	0.839413	0.600663	0.236198	0.755436	1.86972	0.563347	0.776431	2.48927	0.521159	-0.940205	0.299307	1	down	no
60504	x	chr5	-	16623088	16644230	MSTRG.24822.1	2	693	MSTRG.24822	ATF1	0.957852	0.668126	1.71819	1.9087	1.01511	1.12545	0.370777	0.23492	0.536215	0.731126	2.09038	1.06376	0.29931	1	up	no
17544	u	chr13	-	10111463	10148129	MSTRG.7402.1	2	10545	MSTRG.7402	.	2.95756	2.6417	3.0322	1.24827	1.11308	3.14013	3.56729	3.14642	2.97467	4.61183	0.630309	-0.665869	0.29943	1	down	no
71573	o	chr6	-	148354494	148447642	MSTRG.29332.1	2	1805	MSTRG.29332	ROR1	2.71714	1.31648	4.29015	2.92912	3.9868	1.82208	1.01918	2.0242	1.90155	1.70584	1.79865	0.846914	0.299507	1	up	no
80603	i	chr8	-	77978852	77996476	MSTRG.33044.1	2	4418	MSTRG.33044	LRBA	0.333631	0.677632	0.420603	0.407194	0.406979	0.494926	0.878513	0.671865	0.472533	1.73642	0.527951	-0.921523	0.30019	1	down	no
9481	u	chr10	.	31266825	31267945	MSTRG.4058.1	1	1121	MSTRG.4058	.	0.575388	0.514659	0.228809	0.563775	0.071173	0.450083	1.63718	0.234047	0.65629	1.29084	0.457733	-1.12742	0.300235	1	down	no
31364	i	chr15	.	52754195	52758143	MSTRG.13165.1	1	3949	MSTRG.13165	NRG1	0.362024	0.72794	0.342353	0.511395	0.94252	1.48651	0.708802	2.13196	0.712364	0.516513	0.519466	-0.944898	0.300507	1	down	no
17611	u	chr13	.	11808011	11808948	MSTRG.7437.1	1	938	MSTRG.7437	.	0.203581	0.384133	0.047524	0.053581	0.93461	1.72997	0.0001	1.57396	0.756777	0.455327	0.359473	-1.47604	0.300576	1	down	no
75319	i	chr7	-	49674828	49680297	MSTRG.30871.1	1	5470	MSTRG.30871	CEMIP	0.654389	0.281231	0.570207	3.0904	6.36813	1.85286	0.367947	2.14483	0.483643	0.818117	1.93464	0.952062	0.300645	1	up	no
9701	i	chr10	+	38567770	38576704	MSTRG.4183.1	2	8332	MSTRG.4183	MOB3B	1.35	2.11698	5.03085	2.52344	4.12523	1.50438	0.900072	2.41696	2.93722	1.79855	1.58483	0.664327	0.300744	1	up	no
31431	i	chr15	-	54653274	54698099	MSTRG.13207.1	2	9789	MSTRG.13207	RBPMS	0.0001	0.0001	0.687473	0.0001	0.0001	0.0001	0.001661	2.66804	2.11686	0.0001	0.143703	-2.79883	0.301065	1	down	no
35062	u	chr16	.	39206968	39209164	MSTRG.14680.1	1	2197	MSTRG.14680	.	0.465163	0.425705	0.869386	0.229802	0.279231	0.65012	1.3815	0.285591	0.474144	1.72798	0.502129	-0.993871	0.301228	1	down	no
2216	i	chr1	-	82014295	82014825	MSTRG.990.1	1	531	MSTRG.990	ENSSSCG00000004441	3.33124	3.80762	2.81265	2.94705	2.26878	1.53844	0.827234	2.76952	0.973104	1.76185	1.9272	0.946506	0.301349	1	up	no
82641	u	chr9	+	5544857	5564065	MSTRG.33871.1	2	2884	MSTRG.33871	.	4.43408	0.0001	1.076	0.193834	4.33018	1.84959	0.0001	0.0001	0.762508	0.0001	3.84099	1.94148	0.301627	1	up	no
31068	i	chr15	-	45093895	45103675	MSTRG.13058.1	1	9781	MSTRG.13058	STOX2	0.79315	0.700816	1.49801	1.63337	1.24063	1.07117	2.85664	1.17097	0.513185	4.14764	0.601047	-0.73445	0.302331	1	down	no
34612	i	chr16	+	24235965	24304541	MSTRG.14451.1	2	7416	MSTRG.14451	RICTOR	1.20599	0.833934	0.596628	0.942755	1.1406	2.27882	1.37412	2.28403	1.1158	0.996903	0.586348	-0.770171	0.302332	1	down	no
79320	i	chr8	+	32283879	32291910	MSTRG.32556.1	1	8032	MSTRG.32556	APBB2	2.01213	1.65968	2.35276	2.10107	1.98095	1.17687	1.48632	1.2393	1.04335	1.38059	1.59752	0.675834	0.302365	1	up	no
72571	i	chr6	.	169925112	169925745	MSTRG.29781.1	1	634	MSTRG.29781	ENSSSCG00000037852	1.64153	0.856319	1.76246	0.362905	0.782433	0.608386	0.261078	0.842256	0.678977	0.135018	2.14024	1.09778	0.30253	1	up	no
50832	j	chr3	-	39166494	39168285	MSTRG.20977.5	3	835	MSTRG.20977	TNFRSF12A	2.34641	2.23388	1.05898	1.33417	2.24049	0.753417	1.17471	0.898278	0.710741	1.11226	1.98174	0.986768	0.303045	1	up	no
15166	i	chr12	+	33647793	33649885	MSTRG.6398.1	2	1533	MSTRG.6398	MSI2	1.59745	2.36221	2.3155	1.43514	4.163	1.62411	0.708244	1.52148	1.83186	0.726639	1.85163	0.888798	0.30324	1	up	no
61619	i	chr5	+	34434698	34461064	MSTRG.25196.8	2	7175	MSTRG.25196	CNOT2	0.0001	0.0001	0.878608	0.0001	0.0001	0.0001	1.09593	1.16965	0.243049	1.50591	0.21895	-2.19132	0.303267	1	down	no
14972	i	chr12	+	26990103	26995099	MSTRG.6309.1	2	4168	MSTRG.6309	ANKRD40	0.674961	1.21752	1.46805	0.399023	1.27221	0.253116	0.524192	1.11149	0.589229	0.156213	1.91013	0.933674	0.303332	1	up	no
85390	i	chr9	+	74649639	74677006	MSTRG.34919.3	2	6036	MSTRG.34919	PPP1R9A	0.35392	1.27965	0.342651	1.47819	1.65395	2.24582	0.282248	2.38694	2.11344	2.4074	0.541378	-0.885291	0.303356	1	down	no
20829	o	chr13	-	89875038	89910790	MSTRG.8763.8	2	6488	MSTRG.8763	WWTR1	0.547331	0.641801	1.4097	0.802889	1.17532	0.12276	0.366916	0.735835	0.622759	0.648742	1.83301	0.874211	0.303936	1	up	no
63732	u	chr5	.	88450823	88457264	MSTRG.26051.1	1	6442	MSTRG.26051	.	0.168128	0.260397	0.242951	0.280205	0.366142	0.188145	0.160735	0.194065	0.08757	2.14437	0.474912	-1.07427	0.304273	1	down	no
75141	x	chr7	+	46544525	46561965	MSTRG.30803.1	2	2348	MSTRG.30803	GSTA2	15.2244	8.23982	0.217231	2.41407	2.26368	4.69381	2.47567	3.80217	3.38787	0.10132	1.9611	0.971666	0.304898	1	up	no
71584	u	chr6	+	148586666	148592703	MSTRG.29342.1	2	4514	MSTRG.29342	.	2.4221	1.82586	4.00577	3.30839	3.31442	2.02165	1.02067	2.11483	2.08626	1.92747	1.62215	0.697907	0.305047	1	up	no
28498	i	chr14	-	99743938	99753996	MSTRG.11945.2	1	10059	MSTRG.11945	PAPSS2	2.43626	2.07653	1.00774	2.48544	0.615951	2.3596	4.1659	5.52376	1.53153	0.907833	0.595082	-0.748839	0.305103	1	down	no
24914	u	chr14	.	18093230	18096075	MSTRG.10494.1	1	2846	MSTRG.10494	.	0.647263	0.428225	1.98464	0.451637	0.432592	0.664671	0.460506	0.102192	0.247381	0.470366	2.02783	1.01993	0.305253	1	up	no
81980	i	chr8	.	133118385	133120833	MSTRG.33660.1	1	2449	MSTRG.33660	ARHGAP24	0.515415	0.507133	0.368028	0.95935	0.895053	1.09433	1.34099	1.95955	0.857392	0.898072	0.527611	-0.922453	0.305272	1	down	no
35617	u	chr16	.	56422902	56424788	MSTRG.14947.1	1	1887	MSTRG.14947	.	0.266516	0.120348	1.78846	0.904617	1.42244	0.470517	0.418645	0.35815	0.327073	0.571149	2.09849	1.06935	0.305377	1	up	no
74968	i	chr7	+	40298500	40309994	MSTRG.30730.2	2	11199	MSTRG.30730	RUNX2	3.76804	0.533723	1.24847	1.94171	0.767344	1.42953	0.0001	1.04347	1.06335	0.567651	2.01244	1.00895	0.306156	1	up	no
31361	i	chr15	.	52720860	52721938	MSTRG.13162.1	1	1079	MSTRG.13162	NRG1	0.248861	0.580728	0.251271	0.526739	0.760627	2.0379	0.373091	1.58732	0.754398	0.371351	0.462178	-1.11348	0.306304	1	down	no
81206	x	chr8	-	109788528	109917525	MSTRG.33320.1	3	20538	MSTRG.33320	ENSSSCG00000037176	0.232505	0.619024	1.22537	0.159556	1.53087	0.547307	0.077233	0.236576	0.986445	0.237464	1.80685	0.853478	0.306464	1	up	no
63419	i	chr5	+	79870536	79880231	MSTRG.25915.3	2	6808	MSTRG.25915	CHST11	0.0001	0.0001	0.71895	0.806207	0.493155	0.0001	0.0001	0.0001	0.0001	0.355518	5.67128	2.50368	0.306577	1	up	no
46469	x	chr2	-	85401194	85465012	MSTRG.19033.1	2	9684	MSTRG.19033	IQGAP2	0.841044	0.243736	0.050959	0.097901	0.511937	0.093908	0.187917	0.426224	0.089789	0.062403	2.02917	1.02089	0.30674	1	up	no
80809	i	chr8	+	86316499	86318146	MSTRG.33152.1	2	1345	MSTRG.33152	RNF150	4.15966	0.569557	0.579875	0.678193	0.316011	0.069406	1.29788	0.362733	0.333696	0.748592	2.24133	1.16435	0.307445	1	up	no
11600	o	chr11	+	14368246	14478641	MSTRG.5033.1	3	20655	MSTRG.5033	NHLRC3	2.6953	2.0636	3.83748	4.06616	4.4786	2.87425	2.02361	2.19312	2.05459	2.26352	1.50241	0.587279	0.307581	1	up	no
44953	u	chr2	.	69313312	69317474	MSTRG.18486.1	1	4163	MSTRG.18486	.	2.36522	0.313296	0.058978	0.26274	0.146155	0.119431	0.766516	0.199896	0.195274	0.123302	2.24035	1.16372	0.307746	1	up	no
62828	x	chr5	+	66112883	66138023	MSTRG.25685.2	3	1275	MSTRG.25685	CCND2	1.94482	2.00738	1.71067	1.63122	0.879581	0.647099	1.09546	1.18551	0.693141	0.706369	1.88874	0.917425	0.307758	1	up	no
74190	i	chr7	+	28964302	28982174	MSTRG.30437.2	2	1998	MSTRG.30437	DST	0.277074	0.476124	0.408533	0.317006	0.243921	0.560753	0.211763	2.60399	0.256417	0.213563	0.447852	-1.15891	0.307889	1	down	no
71467	i	chr6	+	146193911	146210628	MSTRG.29296.1	2	15218	MSTRG.29296	PDE4B	0.772334	1.08557	0.953924	1.64801	1.63643	0.857192	1.00556	0.932713	0.544912	0.46594	1.60162	0.67953	0.307992	1	up	no
69082	i	chr6	+	79278732	79285056	MSTRG.28347.4	2	2080	MSTRG.28347	EIF4G3	1.25893	0.0001	0.092029	0.082805	0.0001	1.0813	0.041077	2.17149	1.30469	0.117858	0.304036	-1.71768	0.308094	1	down	no
1834	i	chr1	+	64148709	64155199	MSTRG.799.1	1	6491	MSTRG.799	KLHL32	0.085839	0.922457	0.991867	0.06209	0.152214	0.781651	0.81979	1.75173	0.679715	0.459752	0.49291	-1.0206	0.308162	1	down	no
28818	i	chr14	+	107304848	107317997	MSTRG.12079.1	2	7889	MSTRG.12079	ENTPD1	0.0001	5.17838	0.0001	0.0001	0.0001	0.518424	0.0001	0.0001	0.0001	0.0001	9.98176	3.31929	0.308329	1	up	no
12304	u	chr11	.	48317416	48317636	MSTRG.5300.1	1	221	MSTRG.5300	.	553.115	32.2381	28.6914	21.0058	25.7373	763.89	251.327	122.049	89.4025	132.788	0.486067	-1.04077	0.308391	1	down	no
53381	i	chr3	-	101218574	101240760	MSTRG.21995.5	2	12585	MSTRG.21995	SOS1	0.770359	2.29215	0.920738	2.08761	3.15248	3.00981	2.35096	2.63451	3.22491	3.29967	0.635222	-0.654667	0.308413	1	down	no
61604	u	chr5	-	34224380	34228142	MSTRG.25191.1	1	3763	MSTRG.25191	.	0.92333	0.758997	2.53158	1.61071	0.932826	0.702796	0.73226	0.53847	1.05264	0.692771	1.81704	0.861587	0.30885	1	up	no
78905	i	chr8	-	12381239	12395069	MSTRG.32340.1	1	13831	MSTRG.32340	QDPR	0.426333	0.852777	0.432966	1.92618	0.620872	2.00274	0.547493	1.88314	1.53794	1.2102	0.593069	-0.753729	0.308941	1	down	no
58291	u	chr4	.	103487186	103495248	MSTRG.23901.1	1	8063	MSTRG.23901	.	2.02143	0.457974	0.535393	1.27368	0.824501	0.501407	0.37248	0.757356	0.845472	0.497717	1.71898	0.78155	0.309086	1	up	no
9245	i	chr10	+	25503481	25507943	MSTRG.3985.1	1	4463	MSTRG.3985	ENSSSCG00000027557	2.28409	2.18861	1.80565	0.0001	1.94431	0.0001	0.0001	1.89586	0.0001	0.0001	4.3363	2.11646	0.30917	1	up	no
35561	o	chr16	+	54636685	54709484	MSTRG.14913.1	2	14910	MSTRG.14913	ENSSSCG00000036842	2.14848	2.54195	6.23592	2.19446	1.80053	0.686281	1.80287	2.80379	1.51697	2.5895	1.58748	0.666734	0.309253	1	up	no
44718	i	chr2	+	66497048	66513628	MSTRG.18421.1	2	3113	MSTRG.18421	ENSSSCG00000022634	0.0001	2.24628	1.86753	0.0001	2.28498	0.034738	0.44306	0.0001	1.1232	0.0001	3.99639	1.9987	0.309534	1	up	no
22088	x	chr13	+	132345010	132370541	MSTRG.9316.2	2	4927	MSTRG.9316	ACAP2	0.34353	0.242763	0.495762	0.514295	2.38258	0.487861	0.227142	0.562526	0.495915	0.273326	1.94401	0.959033	0.309632	1	up	no
11148	i	chr11	.	2964585	2966361	MSTRG.4789.1	1	1777	MSTRG.4789	ENSSSCG00000009293	0.120992	0.625996	0.082803	0.063729	0.256891	0.133835	0.379884	0.180183	0.185708	1.83036	0.424511	-1.23613	0.309665	1	down	no
78551	u	chr8	-	1419878	1435271	MSTRG.32200.1	1	15394	MSTRG.32200	.	2.21936	2.51837	4.17869	2.06829	3.64366	2.03072	1.40725	2.04571	2.18564	2.0549	1.50433	0.589117	0.309979	1	up	no
35805	u	chr16	.	68022049	68027492	MSTRG.15067.1	1	5444	MSTRG.15067	.	0.233685	1.23842	0.144224	0.366043	0.865217	1.45978	0.460918	1.86316	0.442722	1.32773	0.512682	-0.963864	0.309984	1	down	no
39237	i	chr18	+	9960635	9962857	MSTRG.16396.1	2	1149	MSTRG.16396	HIPK2	3.76824	0.0001	0.0001	2.2734	0.144273	0.0001	0.372456	0.0001	0.0001	0.917005	4.79633	2.26193	0.310218	1	up	no
18611	x	chr13	+	31925852	31964879	MSTRG.7860.4	2	7618	MSTRG.7860	RHOA	0.177476	0.0001	0.230008	0.0001	0.0001	0.0001	0.0001	0.217189	2.33502	0.0001	0.159758	-2.64604	0.31035	1	down	no
50379	u	chr3	.	28157187	28161069	MSTRG.20776.1	1	3883	MSTRG.20776	.	0.348522	0.315193	0.171978	0.923559	0.7856	1.03989	0.384815	1.82096	1.0016	0.710644	0.513291	-0.96215	0.310573	1	down	no
671	x	chr1	+	15433790	15442996	MSTRG.296.1	2	6481	MSTRG.296	PLEKHG1	0.134679	3.88101	0.019432	2.09184	2.84312	0.11308	0.470619	0.808316	1.02462	1.86135	2.0968	1.06819	0.310629	1	up	no
79226	x	chr8	-	30877425	30909358	MSTRG.32526.2	2	6717	MSTRG.32526	UBE2K	0.0001	0.0001	0.0001	0.0001	0.629563	0.0001	1.81682	0.0001	0.0001	2.57879	0.143307	-2.80282	0.310767	1	down	no
63088	i	chr5	.	71449671	71450064	MSTRG.25785.1	1	394	MSTRG.25785	SLC2A13	2.74225	1.36752	2.28889	1.01552	0.233369	1.41683	0.471633	0.698268	0.658645	0.360178	2.12105	1.08478	0.310805	1	up	no
71682	i	chr6	+	151086022	151109644	MSTRG.29387.2	2	22644	MSTRG.29387	NFIA	0.0001	0.0001	2.51475	1.77121	1.45318	0.975434	0.0001	0.0001	0.0001	0.0001	5.88147	2.55618	0.311154	1	up	no
15152	i	chr12	-	33585553	33589900	MSTRG.6394.2	2	3325	MSTRG.6394	MSI2	0.494941	0.888105	0.174545	0.629475	0.765114	0.639447	0.276173	0.922066	2.85262	1.23365	0.498346	-1.00478	0.311279	1	down	no
37099	i	chr17	.	32813288	32813683	MSTRG.15609.1	1	396	MSTRG.15609	VPS16	0.44383	0.592273	1.00213	0.579779	1.36776	1.49472	0.965316	2.17156	1.14922	2.6005	0.475554	-1.07232	0.311369	1	down	no
34668	u	chr16	.	26165586	26166281	MSTRG.14470.1	1	696	MSTRG.14470	.	1.03082	0.858827	1.12009	0.583551	2.2342	1.52083	0.116891	0.418374	0.527532	0.041215	2.22013	1.15064	0.311621	1	up	no
58285	u	chr4	.	103454837	103456291	MSTRG.23895.1	1	1455	MSTRG.23895	.	2.28156	0.402886	0.560809	1.3172	1.02782	0.601522	0.226772	0.854781	0.604115	0.597401	1.93798	0.954556	0.311852	1	up	no
2564	i	chr1	-	97872867	97879042	MSTRG.1130.1	2	6012	MSTRG.1130	ZBTB7C	9.53848	0.106474	0.422779	1.18073	0.581922	0.212324	4.0049	0.340143	0.315913	0.309506	2.28263	1.1907	0.311912	1	up	no
6513	i	chr1	-	235804433	235835632	MSTRG.2826.1	3	13598	MSTRG.2826	VCP	1.10256	0.61718	0.129212	0.40719	1.3555	0.344567	0.20634	0.82549	0.407028	0.285073	1.74602	0.80407	0.312222	1	up	no
15186	i	chr12	-	33790439	33802228	MSTRG.6408.1	2	10500	MSTRG.6408	MSI2	0.976745	7.43405	1.45386	1.50032	2.36653	1.10005	2.10561	2.37071	1.29078	1.56129	1.62919	0.704151	0.31237	1	up	no
47379	i	chr2	.	123192863	123193751	MSTRG.19436.1	1	889	MSTRG.19436	TNFAIP8	0.413376	0.585917	1.21539	0.648493	0.790942	1.2422	2.21602	1.02567	1.13082	1.54883	0.5101	-0.971149	0.312536	1	down	no
71588	u	chr6	-	148635291	148679565	MSTRG.29344.1	3	18114	MSTRG.29344	.	1.55467	0.927384	2.30268	2.12339	2.12248	1.14444	0.840033	1.28483	1.43447	1.25567	1.51534	0.599645	0.312828	1	up	no
48061	x	chr2	-	141414368	141513205	MSTRG.19732.1	2	7595	MSTRG.19732	UBE2D2	0.650396	0.431606	0.629281	3.19102	1.78329	3.50187	2.39912	3.98466	1.08523	0.696548	0.573013	-0.803361	0.312836	1	down	no
54763	u	chr4	-	3942161	3959465	MSTRG.22513.1	1	17305	MSTRG.22513	.	3.95955	2.61245	1.43659	0.828883	5.26574	1.8356	0.44094	2.71511	2.7276	1.18007	1.58475	0.664256	0.31358	1	up	no
1129	u	chr1	.	31500754	31506183	MSTRG.493.1	1	5430	MSTRG.493	.	0.568192	1.05483	0.718907	0.545882	0.468905	1.74204	0.733636	1.08377	0.962836	1.4836	0.558904	-0.839329	0.314041	1	down	no
72894	i	chr7	.	7349846	7352664	MSTRG.29916.1	1	2819	MSTRG.29916	ENSSSCG00000033009	0.139662	0.148132	0.946384	0.313796	0.519802	0.27129	1.3234	0.307592	0.133066	2.1949	0.488806	-1.03266	0.314089	1	down	no
52517	u	chr3	.	72357894	72358606	MSTRG.21632.1	1	713	MSTRG.21632	.	0.49975	0.660666	1.21354	1.04361	0.38915	1.37115	1.07096	1.23965	2.30603	1.72615	0.493486	-1.01892	0.31423	1	down	no
10416	o	chr10	+	53187798	53237050	MSTRG.4523.1	2	2741	MSTRG.4523	ENSSSCG00000029019	0.005773	0.053701	0.506151	0.099582	0.068186	0.033683	0.504301	0.018736	0.084393	1.20557	0.39714	-1.33228	0.314271	1	down	no
83018	x	chr9	-	10108707	10188768	MSTRG.34032.1	2	7253	MSTRG.34032	UVRAG	9.54678	1.19362	1.97616	2.40012	1.90375	1.29848	4.90754	1.30037	1.21871	1.08085	1.73572	0.795538	0.314432	1	up	no
2835	i	chr1	+	107498065	107513374	MSTRG.1249.9	2	13923	MSTRG.1249	ZNF609	0.0001	0.966832	0.710688	1.1075	0.0001	1.35633	2.73017	1.41573	0.0001	2.84189	0.333791	-1.58298	0.314934	1	down	no
90642	u	chrY	.	25261408	25261976	MSTRG.37091.1	1	569	MSTRG.37091	.	55.6312	1.18921	1.26314	2.11487	2.26033	94.699	38.9261	5.52845	3.35364	4.93457	0.423617	-1.23917	0.315661	1	down	no
42024	i	chr2	-	9199739	9211064	MSTRG.17581.18	4	1201	MSTRG.17581	ENSSSCG00000036669	1.35309	0.271731	4.90833	0.0001	0.0001	0.0001	0.4746	0.0001	0.903179	0.0001	4.74092	2.24517	0.315798	1	up	no
22860	u	chr13	+	147417914	147434520	MSTRG.9674.1	2	677	MSTRG.9674	.	0.091301	1.07702	0.228659	1.64384	0.43763	0.438228	4.20255	0.585101	0.593386	1.80616	0.456165	-1.13237	0.316199	1	down	no
11601	i	chr11	+	14386460	14402736	MSTRG.5034.1	2	15984	MSTRG.5034	LHFPL6	1.75358	1.15884	2.17694	2.08519	2.36298	1.4316	1.05642	1.67757	1.10926	1.05045	1.50784	0.592482	0.316339	1	up	no
5128	x	chr1	+	179671811	179686687	MSTRG.2201.3	2	284	MSTRG.2201	RF00017	3.29664	14.0398	11.08	9.6045	5.50696	11.7396	46.42	7.22561	4.8018	10.8312	0.537262	-0.896303	0.316646	1	down	no
85779	i	chr9	-	93057120	93060943	MSTRG.35087.1	1	3824	MSTRG.35087	ENSSSCG00000015390	0.016348	0.94059	0.208207	3.26902	0.763668	0.611642	0.143607	1.11851	0.424091	0.022306	2.2403	1.16369	0.316766	1	up	no
77701	i	chr7	+	99225148	99251125	MSTRG.31844.1	2	14671	MSTRG.31844	IFT43	0.038037	0.124784	0.105987	0.031788	0.228294	0.03881	0.050882	0.07054	0.036737	0.063972	2.02686	1.01924	0.316852	1	up	no
70841	i	chr6	.	115914807	115915586	MSTRG.29030.1	1	780	MSTRG.29030	RNF138	0.461198	0.88903	0.587357	1.92321	1.14066	0.31674	0.694685	0.526721	0.204482	0.623447	2.11382	1.07985	0.317261	1	up	no
71336	i	chr6	.	139107384	139109079	MSTRG.29233.1	1	1696	MSTRG.29233	LRRIQ3	0.502876	0.413617	0.272695	0.297397	0.41048	0.323096	2.26792	0.332568	0.494377	0.409597	0.495634	-1.01265	0.317328	1	down	no
83822	u	chr9	-	37960361	38005212	MSTRG.34351.1	2	44137	MSTRG.34351	.	0.479514	5.48289	0.126887	0.5389	1.4145	5.57396	0.048877	5.03407	3.13758	2.60357	0.490466	-1.02777	0.31749	1	down	no
2558	i	chr1	-	97741785	97749781	MSTRG.1125.1	2	7110	MSTRG.1125	ZBTB7C	8.2389	0.127719	0.717605	1.1845	0.643681	0.282708	3.60039	0.38009	0.268331	0.603006	2.1253	1.08767	0.317823	1	up	no
35043	u	chr16	.	38803328	38808179	MSTRG.14662.1	1	4852	MSTRG.14662	.	0.386566	0.452144	1.00663	0.585217	0.320888	0.390258	1.70855	0.332327	0.431815	2.25736	0.537359	-0.896041	0.317891	1	down	no
65483	i	chr6	-	31275108	31282730	MSTRG.26847.1	2	7596	MSTRG.26847	FTO	0.20548	0.987621	0.0001	0.293565	0.139875	0.0001	0.181415	0.001471	0.266316	0.112765	2.89403	1.53308	0.318327	1	up	no
81973	i	chr8	.	133069747	133072263	MSTRG.33653.1	1	2517	MSTRG.33653	ARHGAP24	0.518686	0.309301	0.574279	0.859914	0.531079	0.953567	0.990713	1.83103	0.709012	0.75333	0.533304	-0.906971	0.318594	1	down	no
79950	j	chr8	+	56084563	56101497	MSTRG.32795.4	5	2197	MSTRG.32795	ENSSSCG00000036736	0.558521	0.541475	0.921249	0.893906	0.427069	1.36851	0.414746	0.824515	2.9601	0.94045	0.51353	-0.961478	0.318734	1	down	no
23505	i	chr13	+	182400707	182405467	MSTRG.9888.1	2	4646	MSTRG.9888	C21orf91	1.3696	0.846492	0.665977	2.3558	0.6081	0.0001	0.676289	0.95851	0.013003	0.846933	2.34323	1.2285	0.318932	1	up	no
61208	o	chr5	+	22681939	22719723	MSTRG.25047.1	2	2599	MSTRG.25047	INHBC	0.187574	1.34172	0.698198	1.16152	0.358992	1.66705	1.13869	1.82998	1.53257	0.973055	0.524833	-0.930071	0.319055	1	down	no
2296	i	chr1	+	86426056	86432519	MSTRG.1017.1	2	5712	MSTRG.1017	SH3BGRL2	0.677665	1.6973	1.45606	1.15703	1.12184	1.84219	2.23137	2.72497	0.703884	2.71222	0.598151	-0.741418	0.319316	1	down	no
84267	j	chr9	-	46235241	46242086	MSTRG.34525.1	5	1597	MSTRG.34525	ENSSSCG00000036296	0.0001	0.788084	14.4662	0.212979	4.87213	12.1292	14.1557	0.654231	11.8224	7.96202	0.435317	-1.19986	0.319616	1	down	no
3977	j	chr1	+	131178521	131198321	MSTRG.1685.6	3	5047	MSTRG.1685	BMF	0.463497	0.392592	2.44991	0.820802	0.517978	2.3544	2.27468	1.71295	1.00663	0.874857	0.564817	-0.824145	0.319654	1	down	no
61837	i	chr5	-	42698705	42737303	MSTRG.25296.2	2	2879	MSTRG.25296	DENND5B	1.85227	0.424433	0.457825	0.443404	0.365644	0.353303	0.41815	0.475087	0.349432	0.284087	1.88482	0.914428	0.319702	1	up	no
80807	i	chr8	-	86264278	86271544	MSTRG.33150.1	1	7267	MSTRG.33150	RNF150	3.09671	0.349503	0.311864	0.464364	0.219158	0.121754	1.18116	0.163212	0.174258	0.518359	2.0575	1.04089	0.319756	1	up	no
53573	i	chr3	+	106307212	106329126	MSTRG.22062.1	2	20359	MSTRG.22062	LTBP1	2.76121	1.37464	2.86916	2.18933	2.42413	1.70111	1.37402	1.89627	1.19273	1.62501	1.49162	0.576884	0.319909	1	up	no
64299	i	chr6	+	1949728	1951259	MSTRG.26342.1	1	1532	MSTRG.26342	FBXO31	0.452617	0.481691	2.09719	0.640785	0.87967	0.374312	0.480693	0.461016	0.448081	0.512886	1.99911	0.999357	0.319951	1	up	no
65904	x	chr6	-	43997790	44047802	MSTRG.27132.1	3	3805	MSTRG.27132	KIAA0355	6.2027	3.26999	3.11595	3.88922	3.55896	1.93318	4.07304	1.55272	1.93861	2.833	1.62497	0.700416	0.32023	1	up	no
19272	u	chr13	.	41608350	41615309	MSTRG.8082.1	1	6960	MSTRG.8082	.	0.45403	1.72294	0.57931	0.443279	0.237003	0.245111	0.327968	0.539469	0.432923	0.355342	1.80794	0.854347	0.320264	1	up	no
6739	o	chr1	+	239451790	239487566	MSTRG.2905.1	2	550	MSTRG.2905	TMOD1	0.432094	0.281713	2.02704	0.951184	1.94569	0.0001	0.180145	0.710463	0.904594	0.574815	2.37867	1.25015	0.320341	1	up	no
37816	i	chr17	.	42061241	42061668	MSTRG.15909.1	1	428	MSTRG.15909	DHX35	0.306625	1.96127	4.5811	1.86435	0.900243	0.901207	0.483786	2.01043	0.69243	0.408872	2.13791	1.0962	0.320437	1	up	no
30254	u	chr15	.	95196	96921	MSTRG.12682.1	1	1726	MSTRG.12682	.	0.221633	1.71742	0.02845	0.171782	0.618031	2.11805	0.037184	1.05252	1.93995	1.34215	0.424865	-1.23492	0.320645	1	down	no
39539	u	chr18	-	16707608	16718058	MSTRG.16566.1	1	10451	MSTRG.16566	.	1.677	1.94386	0.985203	1.6484	3.34662	0.5532	1.54059	0.701971	0.665924	2.36445	1.64793	0.720657	0.320921	1	up	no
25104	i	chr14	+	24218919	24220844	MSTRG.10562.1	1	1926	MSTRG.10562	ADGRD1	1.61262	1.26634	2.60871	2.54427	2.40334	1.38519	0.500487	1.44921	1.25893	1.25345	1.78464	0.835634	0.32098	1	up	no
39505	i	chr18	+	15518117	15529368	MSTRG.16551.1	2	11200	MSTRG.16551	EXOC4	4.32821	4.17579	3.50125	3.87473	3.71936	3.36937	3.5964	0.852929	1.05997	3.57965	1.57319	0.653696	0.321005	1	up	no
76323	j	chr7	-	74782298	74791238	MSTRG.31361.2	4	3784	MSTRG.31361	ENSSSCG00000028443	1.15607	0.415962	2.13994	1.4261	1.63753	0.13071	1.16937	0.254862	1.14922	0.803797	1.9315	0.949718	0.321127	1	up	no
81941	u	chr8	.	132398140	132399796	MSTRG.33636.1	1	1657	MSTRG.33636	.	0.322139	0.958913	0.818635	0.788123	0.50597	0.623842	0.912233	0.335019	1.79518	2.97881	0.51072	-0.969394	0.321131	1	down	no
69199	i	chr6	-	81011711	81014361	MSTRG.28383.1	2	1853	MSTRG.28383	LUZP1	0.919281	0.714862	0.795837	1.1002	0.820747	0.416742	0.193355	0.697899	0.359208	0.645845	1.88103	0.911526	0.321442	1	up	no
49393	u	chr3	-	10443867	10472737	MSTRG.20327.4	2	21931	MSTRG.20327	.	1.20891	0.353046	1.87283	1.05583	2.37403	0.317864	0.786642	0.596533	1.30277	1.24681	1.61498	0.691514	0.321568	1	up	no
49609	o	chr3	+	14446240	14511961	MSTRG.20430.2	2	10198	MSTRG.20430	ENSSSCG00000035984	0.0001	0.229869	1.09826	0.219182	0.143674	0.0001	0.097614	0.21912	0.0001	0.219568	3.15206	1.65629	0.321648	1	up	no
36533	o	chr17	-	13917349	13971363	MSTRG.15346.1	2	12938	MSTRG.15346	SLC23A2	1.48802	0.022284	0.0001	1.36965	0.016333	1.3686	2.36572	1.37225	0.830001	0.954109	0.420334	-1.25039	0.321697	1	down	no
72534	i	chr6	.	168862445	168863308	MSTRG.29763.1	1	864	MSTRG.29763	ENSSSCG00000003965	1.39271	1.30297	0.939581	1.04253	0.605679	1.87121	2.41189	1.16937	1.2685	3.37402	0.523375	-0.934082	0.32178	1	down	no
43025	u	chr2	.	28314219	28330458	MSTRG.17872.1	1	16240	MSTRG.17872	.	0.76422	0.657248	2.30813	1.48297	1.33341	0.549474	0.752491	0.944218	1.1712	0.753569	1.56942	0.650233	0.321913	1	up	no
75323	i	chr7	-	49748201	49753413	MSTRG.30875.1	1	5213	MSTRG.30875	CEMIP	0.448086	0.175274	0.458926	2.00037	3.92549	1.31243	0.279747	1.00139	0.509745	0.56704	1.9094	0.933116	0.322384	1	up	no
45290	i	chr2	-	71847126	71872383	MSTRG.18616.1	3	17347	MSTRG.18616	INSR	0.328237	0.064392	0.31316	0.113443	0.040054	0.065234	0.036855	1.12116	0.639619	0.036411	0.452427	-1.14424	0.32296	1	down	no
73249	u	chr7	.	18335121	18335898	MSTRG.30131.1	1	778	MSTRG.30131	.	0.488704	0.325286	1.8841	1.51958	0.730159	0.866736	0.340408	0.32174	0.575909	0.272728	2.08109	1.05734	0.323092	1	up	no
40045	u	chr18	.	33306084	33306817	MSTRG.16783.1	1	734	MSTRG.16783	.	0.758717	0.635349	0.568653	0.882143	0.91378	1.03982	1.24519	1.34411	1.80046	1.91105	0.512032	-0.965693	0.323126	1	down	no
81626	x	chr8	+	125163026	125234135	MSTRG.33494.2	2	21940	MSTRG.33494	PDLIM5	4.59007	0.931953	2.75877	0.832268	2.07152	2.10411	0.747567	1.31905	1.55976	1.54633	1.53701	0.62013	0.323357	1	up	no
78703	j	chr8	+	4596580	4640144	MSTRG.32257.6	9	3372	MSTRG.32257	JAKMIP1	0.910511	0.079924	0.165093	0.614593	0.866028	0.930252	1.16986	2.5219	0.622961	0.154532	0.488221	-1.03439	0.32337	1	down	no
47186	i	chr2	-	116625306	116625859	MSTRG.19341.1	1	554	MSTRG.19341	MCC	0.694755	0.88099	1.5282	1.81441	0.577823	0.200339	0.457187	0.719521	0.48112	0.79915	2.06832	1.04846	0.323523	1	up	no
12192	i	chr11	+	44135526	44160690	MSTRG.5273.2	2	17285	MSTRG.5273	DACH1	2.33391	2.08817	2.118	0.0001	0.0001	0.0001	0.0001	0.0001	1.22832	0.0001	5.32282	2.41219	0.32365	1	up	no
70163	i	chr6	.	95339017	95339568	MSTRG.28720.1	1	552	MSTRG.28720	ENSSSCG00000032082	0.993699	0.719894	1.82269	0.672521	2.82437	0.259248	0.418957	0.999018	0.908104	0.831466	2.05842	1.04153	0.323998	1	up	no
77124	u	chr7	-	87914240	87928178	MSTRG.31606.1	2	9445	MSTRG.31606	.	2.40788	2.12918	1.63457	3.08987	1.76038	2.10889	4.43176	1.89362	4.43772	4.03146	0.652049	-0.616947	0.324057	1	down	no
39478	u	chr18	-	14809533	14833095	MSTRG.16535.1	2	22532	MSTRG.16535	.	0.822301	0.676997	1.97128	1.73911	1.66885	2.28234	0.554916	3.4531	3.145	1.56127	0.625513	-0.676888	0.324378	1	down	no
24910	u	chr14	.	18058173	18059962	MSTRG.10490.1	1	1790	MSTRG.10490	.	0.68515	0.304742	1.86553	0.664839	0.672849	0.671096	0.428856	0.109881	0.50216	0.361548	2.0222	1.01593	0.324598	1	up	no
49614	u	chr3	-	14533781	14549744	MSTRG.20435.1	1	15964	MSTRG.20435	.	5.17558	5.1901	4.11013	4.1296	5.69861	3.2856	1.92688	3.52005	5.05614	2.91787	1.45476	0.540782	0.324762	1	up	no
71766	u	chr6	+	154552009	154607733	MSTRG.29432.1	2	14630	MSTRG.29432	.	0.142614	1.19082	1.86206	0.523913	2.53285	0.454503	0.02856	0.859509	1.88251	0.079923	1.89175	0.919724	0.324829	1	up	no
81972	i	chr8	.	132999076	133012661	MSTRG.33652.1	1	13586	MSTRG.33652	ARHGAP24	0.784382	0.682809	1.02798	1.38097	0.995883	1.43362	1.95218	1.74664	1.16309	1.20778	0.649317	-0.623005	0.324927	1	down	no
79971	i	chr8	+	56320769	56333478	MSTRG.32805.2	2	7559	MSTRG.32805	IGFBP7	0.963975	0.997648	1.34813	2.5364	3.07083	1.31901	0.61792	1.47635	1.12813	0.946223	1.62492	0.700371	0.325014	1	up	no
62395	i	chr5	+	60725147	60751877	MSTRG.25522.2	2	22512	MSTRG.25522	ETV6	0.518263	1.94989	3.08666	2.54664	4.81373	1.99591	1.70073	0.0001	1.3402	0.0001	2.56405	1.35842	0.325587	1	up	no
8032	u	chr1	-	270161095	270179349	MSTRG.3445.2	3	5708	MSTRG.3445	.	0.0001	0.244797	0.0001	0.0001	0.0001	1.0376	0.0001	0.781859	0.0001	0.0001	0.134741	-2.89173	0.325636	1	down	no
49554	i	chr3	-	13634010	13646187	MSTRG.20401.2	2	11650	MSTRG.20401	ENSSSCG00000035984	7.51755	5.76423	5.03106	4.83444	4.86343	3.49436	2.29815	5.08133	4.68989	3.71001	1.45331	0.539343	0.325648	1	up	no
80308	i	chr8	-	71390568	71405266	MSTRG.32917.1	2	3030	MSTRG.32917	USO1	1.54466	1.9601	2.07469	2.63435	2.3166	0.0001	1.11055	0.0001	1.36755	1.74978	2.49059	1.31649	0.325915	1	up	no
57074	u	chr4	-	90206792	90213473	MSTRG.23505.1	1	6682	MSTRG.23505	.	0.10852	0.203282	0.366451	0.18589	2.61124	0.611485	0.270078	0.229235	0.280324	0.325538	2.0245	1.01757	0.326004	1	up	no
27355	u	chr14	+	63889836	63912690	MSTRG.11440.1	2	22318	MSTRG.11440	.	1.20861	1.687	2.41146	2.20976	1.81815	2.19621	2.72903	2.37039	2.46285	4.15391	0.670982	-0.575654	0.326696	1	down	no
54801	o	chr4	+	7801801	7844973	MSTRG.22548.1	2	8883	MSTRG.22548	ST3GAL1	5.86296	4.94732	3.11189	2.60671	4.06986	2.77846	2.46584	2.88676	3.116	2.66684	1.48044	0.566029	0.32679	1	up	no
35776	u	chr16	+	67305487	67316774	MSTRG.15038.1	1	11288	MSTRG.15038	.	0.499566	1.69849	2.38316	1.1221	0.888905	0.608253	0.435884	1.10045	1.07211	0.861025	1.61664	0.693002	0.326978	1	up	no
8369	i	chr10	-	7736417	7742385	MSTRG.3576.1	2	2825	MSTRG.3576	GPATCH2	0.0001	0.495685	0.661433	1.32148	0.281514	0.435401	0.007796	0.036119	0.014648	0.591038	2.54397	1.34708	0.327014	1	up	no
7632	i	chr1	-	265435938	265449707	MSTRG.3276.2	2	7874	MSTRG.3276	NR6A1	0.0001	0.136389	1.11533	0.0001	0.0001	0.0001	0.1588	0.0001	0.0001	0.0001	7.86447	2.97535	0.327378	1	up	no
35534	u	chr16	.	53505125	53505847	MSTRG.14898.1	1	723	MSTRG.14898	.	0.540041	0.664555	0.539733	1.40045	1.19728	1.69176	0.218356	2.72454	2.44186	1.94789	0.481146	-1.05545	0.327765	1	down	no
30316	o	chr15	-	2181246	2573865	MSTRG.12710.1	4	1312	MSTRG.12710	ENSSSCG00000031246	2.317	0.604413	0.226954	0.484986	0.87945	0.336288	0.812146	0.260952	0.466329	0.312043	2.06275	1.04457	0.327779	1	up	no
41755	i	chr2	-	8191063	8196850	MSTRG.17467.1	2	5541	MSTRG.17467	MARK2	1.08531	1.75541	2.25925	0.51815	1.15729	2.37924	1.8389	2.45629	2.23857	2.29833	0.604336	-0.726576	0.327827	1	down	no
82204	i	chr8	-	138751158	138765837	MSTRG.33746.1	2	6845	MSTRG.33746	BMP2K	0.329713	0.813112	1.4055	1.0419	0.754039	0.470264	1.59585	2.32519	0.954822	2.04291	0.587935	-0.766272	0.327827	1	down	no
81981	i	chr8	.	133121607	133124006	MSTRG.33661.1	1	2400	MSTRG.33661	ARHGAP24	0.266427	0.489005	0.736356	0.763404	0.693931	1.18641	0.82625	1.90938	0.65501	0.90572	0.537889	-0.894619	0.328184	1	down	no
11627	u	chr11	+	14750269	14758183	MSTRG.5049.1	1	7915	MSTRG.5049	.	0.831697	4.11276	1.17971	1.04898	0.887246	1.1593	0.514943	1.39557	1.25609	0.586705	1.64076	0.714362	0.328265	1	up	no
3126	u	chr1	-	114239119	114249119	MSTRG.1361.1	2	4460	MSTRG.1361	.	3.76366	0.271078	0.400658	0.452181	0.283615	0.142798	0.409362	0.119663	0.067614	1.70149	2.11853	1.08306	0.328354	1	up	no
47601	i	chr2	-	132774034	132776105	MSTRG.19553.1	1	2072	MSTRG.19553	CHSY3	2.91421	2.01772	1.44784	1.10917	1.99396	0.770867	0.326476	1.36471	1.89911	0.998554	1.76929	0.823171	0.329019	1	up	no
56216	i	chr4	+	65710881	65714654	MSTRG.23165.1	1	3774	MSTRG.23165	SULF1	1.90199	1.04868	2.26213	2.85169	4.00845	1.58361	1.47453	1.73826	1.04459	1.35428	1.6779	0.746656	0.329192	1	up	no
61477	x	chr5	+	31384208	31450439	MSTRG.25178.3	4	39908	MSTRG.25178	RF00026	3.07265	3.89639	3.04613	2.75212	3.80583	2.48847	1.0866	2.25712	3.27474	2.34458	1.44724	0.533307	0.329328	1	up	no
89609	u	chrX	-	99011605	99022132	MSTRG.36703.1	1	10528	MSTRG.36703	.	4.00756	1.35521	0.536778	0.822403	1.01855	0.776423	1.88394	0.860033	0.528773	0.518182	1.69475	0.76107	0.329368	1	up	no
76985	u	chr7	+	81134625	81148907	MSTRG.31551.1	1	14283	MSTRG.31551	.	5.58005	2.62792	1.26322	0.997877	0.850245	1.04486	1.49985	1.36637	1.18354	2.13582	1.56551	0.646631	0.32952	1	up	no
79759	x	chr8	-	48010353	48034503	MSTRG.32735.2	2	6072	MSTRG.32735	RAPGEF2	0.0001	0.0001	0.0001	0.551415	0.0001	4e-05	0.4323	1.48944	0.0001	0.675478	0.212452	-2.23479	0.329566	1	down	no
35814	u	chr16	.	68102035	68103247	MSTRG.15017.1	1	1213	MSTRG.15017	.	0.161647	0.785945	0.040482	0.374786	0.281817	1.0973	0.17894	1.78955	0.140314	0.607728	0.43124	-1.21344	0.329801	1	down	no
9689	i	chr10	-	38450836	38471231	MSTRG.4175.1	1	20396	MSTRG.4175	MOB3B	1.09463	1.71883	4.3934	2.72766	3.98183	1.62487	0.928472	2.14613	2.94604	1.5026	1.52123	0.605236	0.32983	1	up	no
63122	u	chr5	.	73178837	73179319	MSTRG.25808.1	1	483	MSTRG.25808	.	1.82135	1.77693	1.77916	1.19124	1.95706	0.966373	0.319097	1.31858	1.19993	0.566566	1.95072	0.96401	0.329867	1	up	no
75320	i	chr7	-	49684331	49686034	MSTRG.30872.1	1	1704	MSTRG.30872	CEMIP	0.807032	0.315754	0.674552	2.40871	7.34577	2.01637	0.576322	1.81249	0.544017	0.860507	1.98837	0.991584	0.329868	1	up	no
58281	u	chr4	.	103430181	103441519	MSTRG.23891.1	1	11339	MSTRG.23891	.	2.03147	0.79663	0.703633	1.78305	1.13212	0.706437	0.583371	1.01647	0.917523	0.869386	1.57503	0.655381	0.329947	1	up	no
6425	i	chr1	.	230391903	230392712	MSTRG.2783.1	1	810	MSTRG.2783	GNA14	0.077445	2.00026	0.602149	1.8683	1.85769	0.105085	0.105277	2.31157	0.152864	0.104482	2.30486	1.20468	0.3301	1	up	no
83298	j	chr9	+	20224483	20232597	MSTRG.34165.1	2	4803	MSTRG.34165	CCDC81	0.814013	0.879732	1.36478	1.07318	1.06942	1.76224	1.15948	1.28715	2.41007	2.14802	0.593265	-0.753252	0.330217	1	down	no
35060	u	chr16	.	39190143	39190879	MSTRG.14678.1	1	737	MSTRG.14678	.	0.237213	0.490752	0.573899	0.29536	0.06205	0.130144	1.49522	0.133675	0.170765	1.81183	0.443462	-1.17312	0.330295	1	down	no
23468	u	chr13	-	181028524	181030938	MSTRG.9893.1	1	2415	MSTRG.9893	.	0.897155	0.715617	0.963019	0.855084	1.11984	0.807293	1.97802	1.60537	1.30651	2.4203	0.560607	-0.834938	0.330337	1	down	no
71250	i	chr6	+	136252032	136269308	MSTRG.29188.1	1	17277	MSTRG.29188	ST6GALNAC5	0.0001	2.96369	1.1496	0.85662	0.0001	0.0001	0.195272	0.0001	0.944926	0.0001	4.35785	2.12362	0.330923	1	up	no
15191	i	chr12	-	33823026	33839347	MSTRG.6405.9	2	16198	MSTRG.6405	MSI2	0.183704	1.11879	0.540472	0.003955	0.0001	0.0001	1.39547	0.0001	2.47008	2.28169	0.300454	-1.73478	0.331128	1	down	no
10015	u	chr10	+	44403903	44479025	MSTRG.4342.1	2	3473	MSTRG.4342	.	0.724579	0.0001	1.86736	0.0001	0.0001	0.0001	0.0001	0.391908	0.0001	0.0001	6.60767	2.72414	0.331339	1	up	no
62008	i	chr5	+	47757321	47772478	MSTRG.25367.2	2	14090	MSTRG.25367	RASSF8	0.182769	0.535514	2.79365	0.087702	1.01985	0.053401	0.0001	0.937677	0.0001	0.747035	2.65745	1.41004	0.331373	1	up	no
10785	i	chr10	.	65033211	65034901	MSTRG.4664.1	1	1691	MSTRG.4664	ENSSSCG00000021815	0.3996	0.618936	0.615585	1.79641	0.752806	0.405241	0.448977	0.521761	0.466991	0.317912	1.93594	0.953035	0.331527	1	up	no
21409	u	chr13	.	112387521	112390612	MSTRG.9026.1	1	3092	MSTRG.9026	.	3.07721	0.090052	0.227913	0.215795	0.131431	0.155657	0.981316	0.063725	0.316474	0.117366	2.28958	1.19508	0.331618	1	up	no
12139	i	chr11	-	30577156	30580476	MSTRG.5252.1	2	2129	MSTRG.5252	PCDH17	0.762773	0.520401	0.747085	0.822724	0.761488	0.941844	2.42108	1.17707	0.905494	1.06629	0.555066	-0.849268	0.331655	1	down	no
70153	i	chr6	-	95272394	95274357	MSTRG.28793.1	2	1645	MSTRG.28793	MACF1	3.02116	5.91763	0.0001	0.025745	4.22953	0.0001	0.004935	3.56352	0.0001	0.005031	3.69203	1.88442	0.331678	1	up	no
61476	x	chr5	+	31363911	31463126	MSTRG.25178.2	2	16973	MSTRG.25178	RF00026	0.916194	1.28372	0.874856	0.875199	2.39007	0.791908	0.639596	0.824424	1.10312	0.788453	1.52864	0.612248	0.331696	1	up	no
50557	u	chr3	.	32636421	32637102	MSTRG.20855.1	1	682	MSTRG.20855	.	1.78075	1.03772	0.221366	2.22899	0.25799	0.335429	0.064568	0.399813	1.6532	0.062758	2.19687	1.13545	0.331765	1	up	no
72859	i	chr7	-	5064965	5073361	MSTRG.29896.1	2	7157	MSTRG.29896	BMP6	1.18082	1.09449	2.91499	2.42158	1.89294	1.40986	0.844192	1.48844	1.16395	1.05638	1.59401	0.672664	0.331923	1	up	no
12329	i	chr11	+	49348678	49351733	MSTRG.5324.1	1	3056	MSTRG.5324	MYCBP2	3.70879	0.160056	0.0001	0.0001	0.0001	0.229413	0.427763	0.175311	0.0001	0.195183	3.7646	1.9125	0.332031	1	up	no
89872	o	chrX	-	110382914	110390551	MSTRG.36810.1	4	5261	MSTRG.36810	ssc-mir-503	2.97068	5.10734	1.44064	2.84216	2.11167	1.89947	0.239398	2.7105	2.26854	1.84953	1.61389	0.690544	0.33227	1	up	no
63971	u	chr5	+	98993157	98995492	MSTRG.26179.2	1	2336	MSTRG.26179	.	1.97802	1.62156	2.64901	2.3348	1.74046	3.62829	1.96042	5.29239	2.98263	3.67335	0.588687	-0.764427	0.332463	1	down	no
21246	u	chr13	-	108128120	108140075	MSTRG.8954.1	2	9050	MSTRG.8954	.	0.33508	0.535762	0.907151	0.714244	0.722629	0.681245	2.11374	0.863395	0.222774	1.52959	0.594163	-0.751068	0.332559	1	down	no
71757	u	chr6	-	154159832	154225978	MSTRG.29424.1	1	66147	MSTRG.29424	.	2.72118	8.02748	3.96413	4.20734	4.99294	6.16196	0.944114	5.36392	1.05692	2.13485	1.52684	0.610551	0.332973	1	up	no
36834	u	chr17	+	27436538	27441453	MSTRG.15484.1	2	4331	MSTRG.15484	.	3.07431	0.357207	2.34479	1.23044	0.95629	0.845998	0.370408	1.10388	1.51169	0.760082	1.73409	0.794179	0.333063	1	up	no
25694	u	chr14	-	37962325	37967739	MSTRG.10797.1	1	5415	MSTRG.10797	.	1.52424	1.74122	1.82749	1.0988	2.34317	1.52661	0.193123	1.4012	1.37631	0.639531	1.66153	0.732514	0.333149	1	up	no
24897	u	chr14	.	17945696	17949468	MSTRG.10477.1	1	3773	MSTRG.10477	.	0.836433	0.509622	2.08652	0.745917	0.471495	0.680677	0.576648	0.091251	0.493212	0.614705	1.89294	0.920628	0.333159	1	up	no
71585	u	chr6	+	148599624	148614891	MSTRG.29341.2	2	9863	MSTRG.29341	.	2.39233	1.82451	5.93838	3.95026	3.99909	2.24646	1.4137	2.67342	3.25367	2.45322	1.50364	0.588461	0.333271	1	up	no
71533	i	chr6	-	147422576	147425755	MSTRG.29324.1	1	3180	MSTRG.29324	JAK1	1.8996	1.67353	7.1421	5.47136	2.08142	2.82881	1.44059	2.50234	2.42437	1.87323	1.65032	0.72275	0.333496	1	up	no
35054	u	chr16	.	39123396	39125223	MSTRG.14672.1	1	1828	MSTRG.14672	.	0.392904	0.332478	0.580118	0.150771	0.222134	0.25141	1.25513	0.052747	0.113603	1.93937	0.464642	-1.10581	0.333566	1	down	no
8442	i	chr10	-	10014445	10024763	MSTRG.3605.2	2	1702	MSTRG.3605	MARK1	0.0001	0.023345	0.863894	0.317374	0.0001	0.013997	0.0001	3.82742	1.31213	0.0001	0.233774	-2.09681	0.334175	1	down	no
74050	u	chr7	.	25080011	25081102	MSTRG.30386.1	1	1092	MSTRG.30386	.	1.95298	0.495915	0.502779	1.5632	0.641383	1.35245	4.74382	0.86891	0.805914	2.09873	0.522427	-0.936699	0.334529	1	down	no
62575	i	chr5	-	63311437	63313487	MSTRG.25572.1	1	2051	MSTRG.25572	CD163	0.426121	0.363874	1.02407	0.743975	0.774375	1.27151	1.82025	1.27376	0.854819	0.819838	0.551708	-0.858022	0.334653	1	down	no
69215	u	chr6	+	81175592	81195372	MSTRG.28391.2	1	19781	MSTRG.28391	.	2.346	1.20709	1.62792	2.90405	1.82075	1.37372	3.40889	3.62567	2.98862	3.5442	0.662991	-0.592938	0.334991	1	down	no
8854	i	chr10	+	18004144	18006265	MSTRG.3801.1	2	778	MSTRG.3801	KIF26B	0.62708	0.0001	2.02444	1.32074	0.216594	0.568909	0.334894	0.310674	0.400581	0.108272	2.43073	1.28139	0.33511	1	up	no
496	i	chr1	+	12005921	12011600	MSTRG.255.1	2	5652	MSTRG.255	SCAF8	1.5534	0.0001	0.0001	0.108444	0.0001	0.033665	0.153543	0.183374	0.0001	0.0001	4.48282	2.16441	0.335237	1	up	no
35797	u	chr16	.	67878562	67885863	MSTRG.15059.1	1	7302	MSTRG.15059	.	0.124992	1.19163	0.1111	0.376263	0.602693	1.34654	0.122002	1.83633	0.334584	1.11894	0.505776	-0.98343	0.335418	1	down	no
49334	i	chr3	.	9841410	9844764	MSTRG.20294.1	1	3355	MSTRG.20294	ENSSSCG00000027890	0.772157	1.05151	2.03538	1.48733	1.13592	1.159	0.388549	0.506117	0.525762	1.08441	1.76926	0.823149	0.335441	1	up	no
5522	i	chr1	+	190216266	190272175	MSTRG.2367.1	1	55910	MSTRG.2367	ENSSSCG00000005095	0.888629	1.31785	2.85103	1.62218	2.15308	0.857865	1.78501	1.44968	0.60796	1.07405	1.5296	0.613155	0.335532	1	up	no
81977	i	chr8	.	133105009	133106022	MSTRG.33657.1	1	1014	MSTRG.33657	ARHGAP24	0.446864	0.670986	0.523079	0.688601	0.403813	1.32665	0.672047	1.81723	0.673966	0.910204	0.506165	-0.98232	0.335563	1	down	no
47668	i	chr2	-	134219712	134221944	MSTRG.19575.1	2	793	MSTRG.19575	ENSSSCG00000014272	0.042764	5.23131	1.48351	2.58038	0.150024	5.66979	2.25957	5.92558	4.01082	2.73472	0.460572	-1.1185	0.335679	1	down	no
71437	i	chr6	.	145689175	145690604	MSTRG.29276.1	1	1430	MSTRG.29276	WDR78	0.683852	0.559178	0.489271	0.380218	0.491825	0.429467	1.13348	0.771881	0.703541	2.03432	0.513405	-0.961832	0.335872	1	down	no
86911	i	chr9	-	130360204	130364286	MSTRG.35574.1	2	3797	MSTRG.35574	RPS6KC1	0.532849	0.61081	0.225464	0.997118	0.357902	0.366913	1.63676	0.857987	1.81362	0.403665	0.53636	-0.898726	0.336032	1	down	no
34789	u	chr16	.	30123752	30124164	MSTRG.14533.1	1	413	MSTRG.14533	.	0.49655	0.463069	1.01358	1.77165	0.166091	0.211544	3.26827	0.463975	0.312876	4.46286	0.448528	-1.15673	0.336086	1	down	no
84749	i	chr9	+	56129885	56156828	MSTRG.34691.3	3	13555	MSTRG.34691	ARHGAP32	1.34272	0.715984	2.01423	0.670373	0.598439	0.587558	0.788042	0.546972	0.764635	0.0001	1.98777	0.991151	0.336283	1	up	no
5418	u	chr1	-	187377182	187384941	MSTRG.2318.2	3	5173	MSTRG.2318	.	0.0001	0.0001	0.31596	0.029696	1.96757	0.0001	0.250568	0.245965	0.0001	0.0001	4.65634	2.2192	0.336536	1	up	no
2764	i	chr1	+	105997465	105998167	MSTRG.1222.1	1	703	MSTRG.1222	TXNL1	2.71502	2.1554	2.1136	2.29913	2.19603	1.41813	1.57975	1.21678	1.20814	0.835737	1.83416	0.875119	0.336536	1	up	no
75855	i	chr7	.	59238269	59241074	MSTRG.31096.1	1	2806	MSTRG.31096	CCDC33	2.03017	1.9426	0.391329	2.19425	0.46176	1.25159	10.065	1.01059	0.697679	0.337033	0.525383	-0.928558	0.336661	1	down	no
9943	i	chr10	-	42619450	42626536	MSTRG.4286.1	2	675	MSTRG.4286	KIF5B	0.269024	0.440788	0.574761	0.805144	0.642737	0.575738	0.663991	0.761383	1.50913	2.00546	0.495395	-1.01335	0.336733	1	down	no
89594	u	chrX	.	98662243	98663122	MSTRG.36696.1	1	880	MSTRG.36696	.	0.256661	0.69617	0.430182	0.775841	0.878824	0.793668	1.04836	1.7567	0.858267	1.4874	0.511015	-0.968562	0.336811	1	down	no
12280	i	chr11	+	47734935	47743238	MSTRG.5309.8	2	7210	MSTRG.5309	COMMD6	0.440777	0.248848	1.22987	1.49419	0.382476	1.13503	0.222901	0.181192	0.0001	0.204336	2.17724	1.1225	0.337109	1	up	no
53272	o	chr3	+	97686067	97747646	MSTRG.21952.1	2	1513	MSTRG.21952	RF00001	0.953373	0.821975	0.886982	0.776366	1.42532	3.13697	0.770558	2.07896	2.11473	0.975669	0.535869	-0.900047	0.337383	1	down	no
20827	o	chr13	-	89863795	89890668	MSTRG.8763.6	3	7509	MSTRG.8763	WWTR1	0.0001	1.62909	0.0001	0.266686	0.239873	0.212374	0.293681	4.68606	0.0001	1.79037	0.305882	-1.70895	0.337498	1	down	no
64539	u	chr6	.	8603327	8604931	MSTRG.26498.1	1	1605	MSTRG.26498	.	1.71585	1.52586	1.82875	1.9859	0.979961	0.939663	0.578986	0.549936	1.43161	1.00878	1.78229	0.833736	0.337579	1	up	no
4854	i	chr1	+	166480788	166501817	MSTRG.2077.1	2	18521	MSTRG.2077	CORO2B	7.79869	1.68131	3.02285	2.35793	3.20492	2.14184	3.43142	2.20893	1.96128	2.21067	1.51125	0.595743	0.338214	1	up	no
53987	i	chr3	+	114219659	114250141	MSTRG.22247.1	1	30483	MSTRG.22247	NCOA1	1.52463	1.24105	0.408996	0.909165	1.99581	2.16352	1.98147	2.29083	1.18222	1.69614	0.65273	-0.615441	0.338229	1	down	no
58290	u	chr4	.	103482348	103485484	MSTRG.23900.1	1	3137	MSTRG.23900	.	1.60792	0.497163	0.499967	1.66383	1.10781	0.369689	0.400366	0.802727	0.735647	0.701109	1.78655	0.837176	0.338365	1	up	no
17249	u	chr12	+	60956068	60962663	MSTRG.7258.3	2	5734	MSTRG.7258	.	0.622442	0.486473	0.18454	2.15056	3.54838	0.0001	0.701456	0.994195	0.464587	1.03285	2.18978	1.13079	0.338441	1	up	no
5083	u	chr1	.	177591900	177592860	MSTRG.2177.1	1	961	MSTRG.2177	.	0.581275	0.305231	0.393561	0.53776	0.945822	0.911089	2.06153	0.484954	1.0348	0.862483	0.516102	-0.954272	0.338683	1	down	no
25077	x	chr14	+	23346391	23406496	MSTRG.10568.1	2	1231	MSTRG.10568	EP400	0.065654	0.085267	0.172166	0.026115	1.42899	0.186772	1.6941	0.165545	1.98889	0.133236	0.426574	-1.22913	0.338964	1	down	no
19469	u	chr13	-	46372198	46420435	MSTRG.8212.2	1	48238	MSTRG.8212	.	1.03398	0.161271	1.20935	2.8285	0.562717	0.889308	0.372204	1.10286	1.03352	0.167309	1.62566	0.701025	0.339355	1	up	no
10507	x	chr10	+	56430763	56567195	MSTRG.4543.5	11	7981	MSTRG.4543	NRP1	1.37899	0.640866	1.39424	0.453031	1.59982	0.0001	0.648176	1.04119	0.619203	0.38746	2.0277	1.01985	0.339617	1	up	no
58288	u	chr4	.	103466842	103478000	MSTRG.23898.1	1	11159	MSTRG.23898	.	1.80577	0.598211	0.683212	1.61564	0.749514	0.53719	0.50262	0.835899	0.952989	0.596983	1.59161	0.670487	0.339667	1	up	no
50058	i	chr3	.	19573996	19576109	MSTRG.20611.1	1	2114	MSTRG.20611	IL4R	1.47427	0.885127	1.63958	1.9945	2.32424	0.888109	1.0526	0.756965	0.700295	1.25269	1.78851	0.838754	0.339878	1	up	no
60306	i	chr5	-	14129459	14134220	MSTRG.24748.1	1	4762	MSTRG.24748	NUAK1	1.56483	1.19118	2.99668	2.26137	2.08342	1.35081	1.03051	1.33943	0.814795	1.65522	1.63106	0.705808	0.339981	1	up	no
74129	i	chr7	-	27225209	27233189	MSTRG.30403.2	1	7981	MSTRG.30403	GCLC	1.26077	8.68332	0.678614	1.40803	2.25173	1.63218	1.69526	2.24573	2.00673	1.28324	1.61144	0.688354	0.340002	1	up	no
208	i	chr1	.	5131401	5135767	MSTRG.79.1	1	4367	MSTRG.79	PACRG	0.357246	0.676352	0.228958	0.352476	0.347873	0.269478	0.994494	0.316636	0.348807	1.74505	0.534201	-0.904545	0.340018	1	down	no
7218	i	chr1	+	253282771	253292824	MSTRG.3106.1	2	4936	MSTRG.3106	KIAA1958	0.742163	1.06687	0.799935	0.675785	0.706952	1.64483	0.739898	1.55679	2.28609	0.737175	0.573126	-0.803075	0.340223	1	down	no
35032	u	chr16	.	38698281	38701371	MSTRG.14651.1	1	3091	MSTRG.14651	.	0.319585	0.424359	0.691791	0.407181	0.161745	0.342943	1.21432	0.309006	0.164398	1.8081	0.522215	-0.937285	0.340254	1	down	no
15246	i	chr12	+	34591773	34594314	MSTRG.6390.1	1	2542	MSTRG.6390	TSPOAP1	1.62	1.06399	1.71343	2.02566	0.65	2.07153	1.65989	1.44051	2.82626	4.36955	0.571897	-0.806172	0.340331	1	down	no
141	u	chr1	-	2814131	2873903	MSTRG.54.1	2	18947	MSTRG.54	.	2.15575	1.26293	2.11029	1.04727	11.7951	0.243317	3.73619	1.36039	0.293243	4.22916	1.86279	0.897462	0.34048	1	up	no
47181	i	chr2	-	116504576	116515027	MSTRG.19332.7	2	9382	MSTRG.19332	MCC	2.22591	1.07959	3.37269	1.29996	0.995183	1.02852	1.3866	1.19434	1.03777	1.07004	1.56951	0.650315	0.340502	1	up	no
62398	i	chr5	+	60759038	60771327	MSTRG.25523.2	1	12290	MSTRG.25523	ETV6	9.66666	4.87298	6.47677	6.47821	6.96649	2.68441	9.87617	1.53018	6.00468	0.260322	1.69294	0.759533	0.340522	1	up	no
62784	u	chr5	-	65458487	65470812	MSTRG.25661.1	4	7204	MSTRG.25661	.	0.132235	0.283713	0.0001	0.361708	0.113201	0.161815	2.10361	0.364947	0.0001	0.0001	0.338693	-1.56195	0.340554	1	down	no
39535	u	chr18	+	16657195	16679102	MSTRG.16563.1	2	16688	MSTRG.16563	.	1.72377	1.83119	1.2446	1.55373	3.5434	0.659951	1.62112	0.731455	0.669574	2.59533	1.57655	0.656771	0.340744	1	up	no
21403	u	chr13	.	112283343	112286390	MSTRG.9020.1	1	3048	MSTRG.9020	.	3.00809	0.193568	0.128884	0.150972	0.265487	0.131989	0.889535	0.31199	0.202038	0.220891	2.13329	1.09308	0.340862	1	up	no
55352	i	chr4	+	31902133	31907863	MSTRG.22802.2	2	5711	MSTRG.22802	ZFPM2	0.0001	0.0001	0.0001	0.0001	1.0283	2.49256	1.47547	1.18152	0.0001	0.0001	0.199757	-2.32368	0.341004	1	down	no
8397	i	chr10	.	9014468	9015288	MSTRG.3585.1	1	821	MSTRG.3585	LYPLAL1	0.584411	0.564507	0.954008	0.425338	0.567281	0.548532	1.3198	1.11424	1.83896	1.19498	0.514509	-0.958731	0.341322	1	down	no
31426	i	chr15	+	54623272	54640479	MSTRG.13204.1	2	11600	MSTRG.13204	RBPMS	0.081901	0.086295	1.21406	0.11385	0.883741	1.86005	0.074072	1.91405	0.701141	0.191865	0.501954	-0.994373	0.341359	1	down	no
59692	u	chr5	.	5032219	5033165	MSTRG.24498.1	1	947	MSTRG.24498	.	0.178877	1.9276	0.081641	0.048592	0.921275	0.254565	0.328303	0.156048	0.426466	0.240885	2.24565	1.16713	0.341549	1	up	no
19280	u	chr13	.	41746059	41752226	MSTRG.8089.1	1	6168	MSTRG.8089	.	0.274478	2.07258	0.425559	0.310987	0.307504	0.310985	0.193041	0.419221	0.592964	0.362928	1.80461	0.851684	0.341584	1	up	no
5465	x	chr1	-	188611295	188616600	MSTRG.2336.1	2	1834	MSTRG.2336	JKAMP	0.939854	0.92266	1.10174	1.41834	1.13137	1.10739	2.26968	1.54181	1.26504	3.58981	0.564161	-0.82582	0.342018	1	down	no
49629	i	chr3	+	14723332	14737247	MSTRG.20445.1	2	12437	MSTRG.20445	AUTS2	3.63286	2.36359	1.8746	2.4661	2.67607	2.18741	1.26968	2.34379	1.882	1.24148	1.45817	0.544159	0.342138	1	up	no
71582	u	chr6	+	148569744	148656160	MSTRG.29340.1	2	29024	MSTRG.29340	.	3.77103	2.63993	6.49561	4.77695	3.9947	3.01623	2.18925	3.21342	3.84718	2.72434	1.44614	0.532205	0.34235	1	up	no
29290	x	chr14	-	113788695	113798051	MSTRG.12280.1	3	3927	MSTRG.12280	WBP1L	4.22931	2.62415	5.94343	5.49127	3.77347	3.21513	2.1027	2.95525	3.08375	3.15156	1.52061	0.604653	0.342474	1	up	no
81984	i	chr8	.	133144074	133151219	MSTRG.33664.1	1	7146	MSTRG.33664	ARHGAP24	0.718772	0.659974	0.812757	1.31091	0.935092	1.46806	1.55346	2.07384	1.06268	1.04748	0.615849	-0.699352	0.342602	1	down	no
17126	x	chr12	-	59755039	59821115	MSTRG.7189.2	3	8177	MSTRG.7189	ULK2	2.76756	1.8839	4.21411	0.001417	0.00413	0.9292	0.552913	1.21452	1.19516	0.139977	2.20031	1.1377	0.342675	1	up	no
31363	i	chr15	.	52746510	52747682	MSTRG.13164.1	1	1173	MSTRG.13164	NRG1	0.515232	0.909742	0.53605	0.827579	1.34695	1.9619	1.05035	2.88583	0.915959	0.948694	0.532745	-0.908484	0.342918	1	down	no
35037	u	chr16	.	38751546	38757277	MSTRG.14656.1	1	5732	MSTRG.14656	.	0.330953	0.536382	0.814362	0.349417	0.201546	0.381589	1.41993	0.233432	0.217936	1.84106	0.545356	-0.87473	0.343296	1	down	no
73184	u	chr7	-	17249473	17266079	MSTRG.30070.2	2	16585	MSTRG.30070	.	0.0001	0.0001	1.11951	0.0001	0.0001	2.5376	0.0001	2.24282	1.22036	0.0001	0.186622	-2.42181	0.343441	1	down	no
80851	i	chr8	-	87159050	87218113	MSTRG.33165.7	3	48223	MSTRG.33165	MAML3	1.23181	2.12805	1.35054	1.5445	1.73205	2.7505	1.65953	2.07858	3.08381	2.23018	0.67671	-0.56339	0.343579	1	down	no
87943	u	chrX	.	39382194	39384070	MSTRG.35993.1	1	1877	MSTRG.35993	.	0.325291	0.723427	0.441125	0.413467	0.714753	2.05888	0.14068	0.998093	1.13195	0.787421	0.511637	-0.966806	0.343593	1	down	no
65669	o	chr6	+	37721593	37771745	MSTRG.27018.1	2	8395	MSTRG.27018	C16orf87	1.18126	3.33589	1.79235	1.19379	2.04599	4.16785	0.998344	4.0081	5.26292	1.10421	0.61444	-0.702656	0.343654	1	down	no
17248	u	chr12	+	60955167	60962663	MSTRG.7258.2	2	3418	MSTRG.7258	.	0.579236	0.370123	0.561435	0.513021	2.65183	1.01147	0.377751	0.277161	0.0001	0.46909	2.18941	1.13054	0.343728	1	up	no
80802	i	chr8	+	86109696	86209022	MSTRG.33146.1	3	52033	MSTRG.33146	RNF150	10.9944	1.09014	0.996483	1.57342	1.29904	0.464522	5.26175	0.628918	0.841281	1.73441	1.78632	0.836992	0.343854	1	up	no
61567	i	chr5	-	33725611	33730637	MSTRG.25183.1	1	5027	MSTRG.25183	FRS2	1.11121	0.003505	2.28816	0.007381	0.0001	0.209139	0.00876	0.0001	0.752675	0.0001	3.51302	1.81271	0.343903	1	up	no
37824	u	chr17	.	42107035	42112708	MSTRG.15917.1	1	5674	MSTRG.15917	.	0.366679	0.722951	1.86106	1.25881	0.266512	0.734427	0.153815	0.867478	0.565003	0.158516	1.8054	0.852316	0.344199	1	up	no
74174	i	chr7	-	28915218	28919740	MSTRG.30431.1	1	4523	MSTRG.30431	DST	4.90885	4.82753	2.656	2.52171	2.6282	3.24529	1.16485	3.07001	1.92782	2.09604	1.52488	0.6087	0.344337	1	up	no
84553	u	chr9	.	51563567	51563907	MSTRG.34601.1	1	341	MSTRG.34601	.	2.47809	0.927908	1.28121	2.23926	4.02844	1.42934	0.440872	2.74644	0.073658	0.0001	2.3356	1.22379	0.344844	1	up	no
31140	x	chr15	+	46577704	46708642	MSTRG.13093.1	3	5893	MSTRG.13093	SORBS2	0.795131	0.817958	1.10279	1.70265	0.992473	0.855536	2.88539	1.39929	1.07195	2.56656	0.616376	-0.698117	0.344903	1	down	no
79555	i	chr8	-	41013704	41017771	MSTRG.32648.1	2	2673	MSTRG.32648	PDGFRA	2.56215	2.09948	2.34656	2.34248	1.82583	1.55066	1.19286	0.85171	2.18714	0.902594	1.67189	0.741477	0.345044	1	up	no
37818	i	chr17	.	42076449	42077688	MSTRG.15911.1	1	1240	MSTRG.15911	DHX35	0.44098	1.52358	2.05053	1.98157	0.400835	1.37717	0.421112	0.647858	0.649542	0.2071	1.937	0.953826	0.345196	1	up	no
35777	u	chr16	-	67322344	67340179	MSTRG.15039.1	2	15239	MSTRG.15039	.	0.427767	1.54183	2.50455	1.10651	0.817186	0.576026	0.309258	1.08871	1.27976	0.826541	1.56799	0.648912	0.345274	1	up	no
87413	i	chrX	+	10328362	10341146	MSTRG.35780.1	1	12785	MSTRG.35780	RAB9A	3.74856	3.9161	7.12731	5.03753	4.13654	1.92765	1.65531	4.03787	5.15868	3.57698	1.46523	0.551129	0.345417	1	up	no
83429	u	chr9	-	25990274	25997520	MSTRG.34210.1	4	1829	MSTRG.34210	.	0.526631	0.200267	0.0001	0.751452	0.050006	0.067288	3.42181	0.080224	0.276579	0.040107	0.393323	-1.34621	0.345535	1	down	no
12423	u	chr11	-	62439402	62449329	MSTRG.5359.1	2	9895	MSTRG.5359	.	7.18217	1.6199	2.45106	2.07967	3.5854	2.3994	1.74267	2.35485	2.10947	2.73612	1.49158	0.576837	0.345623	1	up	no
67950	i	chr6	.	61645379	61648806	MSTRG.27889.1	1	3428	MSTRG.27889	AURKC	1.04202	0.56627	1.27616	1.8504	0.070204	1.47506	1.83928	2.17608	1.60923	1.65834	0.548647	-0.86605	0.345939	1	down	no
50561	u	chr3	.	32677003	32677995	MSTRG.20859.1	1	993	MSTRG.20859	.	0.609565	0.542297	0.238838	2.79573	0.644087	0.194218	0.389363	0.099213	1.37952	0.215512	2.12067	1.08452	0.346269	1	up	no
24384	u	chr14	.	3872198	3874031	MSTRG.10247.1	1	1834	MSTRG.10247	.	1.32601	0.357232	2.01162	0.950779	0.496044	0.546109	0.734622	0.306686	0.658959	0.507794	1.86687	0.900622	0.346735	1	up	no
86125	i	chr9	-	106904555	106910849	MSTRG.35233.1	1	6295	MSTRG.35233	PRKAR2B	6.42966	7.29604	1.99862	3.45885	3.68747	3.16129	2.75369	3.48701	4.34885	1.63098	1.48686	0.572271	0.346932	1	up	no
74148	u	chr7	-	28659271	28662371	MSTRG.30425.1	1	3101	MSTRG.30425	.	2.83387	2.2381	1.11964	2.11869	1.65005	2.80174	2.4829	2.33238	2.50585	6.42156	0.602036	-0.732078	0.346958	1	down	no
74354	x	chr7	-	31097429	31160814	MSTRG.30495.2	4	15839	MSTRG.30495	SCUBE3	1.69087	1.95662	1.29473	1.8798	1.77189	1.15491	1.66302	1.42049	1.09195	0.328429	1.51868	0.602819	0.347051	1	up	no
77957	u	chr7	.	112140989	112146982	MSTRG.31968.1	1	5994	MSTRG.31968	.	0.727566	1.69748	0.676013	0.946595	0.983487	1.32027	1.43712	1.78268	2.01123	1.70151	0.609628	-0.714	0.347081	1	down	no
71689	j	chr6	+	151188407	151218169	MSTRG.29388.5	3	20529	MSTRG.29388	ENSSSCG00000039434	1.53785	1.96547	7.21568	4.78306	8.40296	2.80063	1.85545	3.12368	1.87446	5.82352	1.54448	0.627119	0.347166	1	up	no
8614	u	chr10	-	13540603	13548146	MSTRG.3707.2	2	7191	MSTRG.3707	.	0.000746	1.32689	1.71691	0.0001	1.30396	2.33495	3.11832	1.74304	1.25164	1.1959	0.450921	-1.14905	0.34742	1	down	no
87118	u	chr9	-	135080884	135089826	MSTRG.35671.1	2	8641	MSTRG.35671	.	0.470902	0.886801	2.44525	1.33793	1.19222	1.17076	0.699358	1.19254	0.370376	0.38031	1.66078	0.731857	0.347455	1	up	no
34568	x	chr16	-	23459274	23488338	MSTRG.14432.1	2	2112	MSTRG.14432	EGFLAM	0.310177	1.80782	0.293289	0.696099	0.900566	2.79025	0.392603	2.42506	1.64484	0.607216	0.509919	-0.971659	0.347819	1	down	no
4938	i	chr1	-	169059752	169103419	MSTRG.2112.3	2	3915	MSTRG.2112	THSD4	5.76263	2.70526	4.9733	0.0001	0.0001	0.0001	2.7559	0.205863	0.0001	0.0001	4.53785	2.18201	0.347919	1	up	no
55448	i	chr4	.	35065865	35066642	MSTRG.22843.1	1	778	MSTRG.22843	NCALD	0.584809	0.412563	0.269477	0.981275	0.234493	1.55591	0.578211	1.79879	0.761261	0.465276	0.481179	-1.05535	0.348094	1	down	no
11893	i	chr11	+	20858217	20873796	MSTRG.5144.5	2	4723	MSTRG.5144	LRCH1	0.289821	0.192231	0.270831	0.233681	0.284155	0.273971	1.10684	0.571445	0.740755	0.0001	0.47184	-1.08363	0.348138	1	down	no
51552	u	chr3	.	46218753	46219246	MSTRG.21244.1	1	494	MSTRG.21244	.	1.18448	0.042127	1.18243	0.0001	0.550836	1.24319	0.644372	0.448717	2.55002	2.28662	0.41266	-1.27698	0.34826	1	down	no
61417	u	chr5	.	30176939	30177743	MSTRG.25124.1	1	805	MSTRG.25124	.	0.363243	0.94709	1.97363	1.39786	0.829761	0.791576	0.344897	0.66638	0.459711	0.584854	1.93564	0.952813	0.348264	1	up	no
49571	i	chr3	+	13921791	13985247	MSTRG.20412.1	4	11944	MSTRG.20412	ENSSSCG00000035984	3.05644	2.96088	1.09847	0.456082	1.96166	0.067406	0.231374	0.828883	3.34254	1.13409	1.70111	0.766477	0.348265	1	up	no
47376	i	chr2	.	123170033	123179966	MSTRG.19433.1	1	9934	MSTRG.19433	TNFAIP8	0.481412	0.409288	0.840364	0.85006	0.727734	0.717921	1.69746	0.677242	0.778703	1.41942	0.625404	-0.67714	0.348406	1	down	no
69152	i	chr6	-	80044653	80053249	MSTRG.28359.2	2	7984	MSTRG.28359	CDC42	2.37529	1.29883	1.60623	3.66196	1.59537	3.90053	1.47363	3.8616	3.59984	3.45673	0.646787	-0.628637	0.348413	1	down	no
53300	i	chr3	+	98065350	98069981	MSTRG.21964.1	1	4632	MSTRG.21964	EML4	2.39985	0.324376	1.42362	1.64587	0.908153	1.80137	1.58122	1.60455	2.41155	3.96949	0.58953	-0.762364	0.348509	1	down	no
71575	i	chr6	+	148395574	148401615	MSTRG.29334.1	3	5536	MSTRG.29334	ROR1	1.5955	1.08219	3.28177	2.2641	2.3773	1.3489	0.865274	1.32399	1.70083	1.4604	1.58236	0.662079	0.348574	1	up	no
212	i	chr1	.	5166018	5168258	MSTRG.83.1	1	2241	MSTRG.83	PACRG	0.32534	0.559355	0.763658	0.53541	0.303707	0.262679	1.70062	0.301964	0.456646	1.92777	0.534976	-0.902454	0.348781	1	down	no
75099	i	chr7	+	46112952	46118095	MSTRG.30783.1	2	4779	MSTRG.30783	PAQR8	1.93266	0.0001	1.01877	0.0001	2.42651	0.0001	0.0001	0.0001	1.12788	0.0001	4.76667	2.25298	0.348814	1	up	no
72008	i	chr6	+	159244781	159248381	MSTRG.29548.1	2	2234	MSTRG.29548	SCP2	0.694567	0.217295	0.570882	0.365216	0.254703	0.11449	3.32656	0.249587	0.297161	0.17524	0.505079	-0.985418	0.3491	1	down	no
90506	u	chrY	.	6336474	6341787	MSTRG.37024.1	1	5314	MSTRG.37024	.	0.492465	0.459086	0.315739	0.292917	1.78769	0.322192	0.047957	0.427918	0.758531	0.249941	1.85321	0.890027	0.349117	1	up	no
86725	u	chr9	.	124408146	124416351	MSTRG.35495.1	1	8206	MSTRG.35495	.	0.178698	0.410138	0.66412	0.258429	0.575759	0.426517	0.51339	0.349313	0.550894	1.83096	0.568538	-0.814672	0.349159	1	down	no
56187	i	chr4	-	65080580	65090527	MSTRG.23153.2	2	9068	MSTRG.23153	NCOA2	1.55636	1.90894	0.268903	0.235522	1.9567	0.268912	0.917433	0.256697	1.67071	0.202596	1.78703	0.837564	0.349606	1	up	no
40072	j	chr18	+	33636519	33648480	MSTRG.16789.6	2	10980	MSTRG.16789	DOCK4	1.70226	1.92934	4.83614	3.24779	3.58028	3.47455	1.32285	2.55147	1.63809	1.24938	1.49427	0.579437	0.35033	1	up	no
85802	j	chr9	+	93393722	93419741	MSTRG.35063.2	5	4360	MSTRG.35063	TMEM243	2.01498	1.251	2.09993	4.66601	0.691448	4.64913	4.11571	2.6569	2.06132	3.86705	0.618058	-0.694187	0.350384	1	down	no
81971	i	chr8	.	132980823	132997936	MSTRG.33651.1	1	17114	MSTRG.33651	ARHGAP24	0.536212	0.649557	0.915616	1.38203	0.891116	1.34135	1.84502	1.58745	0.827231	0.976786	0.665042	-0.588483	0.350398	1	down	no
74189	x	chr7	-	28964078	29039013	MSTRG.30438.1	2	1909	MSTRG.30438	DST	2.78323	0.099446	0.189924	0.0001	0.051558	2.83231	1.79866	0.0001	1.97259	2.24471	0.353089	-1.5019	0.351001	1	down	no
86126	i	chr9	-	106912607	106914645	MSTRG.35234.1	1	2039	MSTRG.35234	PRKAR2B	6.7708	7.62397	1.85549	3.17674	3.65233	2.60779	1.8704	2.85045	5.47904	1.49029	1.61417	0.690792	0.351374	1	up	no
84152	u	chr9	.	45047298	45047888	MSTRG.34488.1	1	591	MSTRG.34488	.	0.687957	1.73675	0.218032	0.0001	1.05503	1.02092	1.42969	1.55851	3.3345	1.07655	0.439168	-1.18716	0.351374	1	down	no
55334	i	chr4	-	30963634	30966373	MSTRG.22790.1	2	2653	MSTRG.22790	OXR1	0.590855	0.41632	0.321088	0.291606	0.162287	0.246117	0.613668	0.166184	0.374722	2.08207	0.511709	-0.966606	0.351392	1	down	no
41325	i	chr2	+	5339053	5349669	MSTRG.17328.3	2	6610	MSTRG.17328	KDM2A	2.60141	1.84941	2.41113	1.23253	1.73592	4.89146	1.61347	5.45879	1.07343	2.69738	0.624766	-0.678613	0.351483	1	down	no
83971	u	chr9	+	40133221	40138299	MSTRG.34426.1	1	5079	MSTRG.34426	.	7.16104	0.333538	0.55246	1.28818	0.505907	1.38435	1.8356	0.719209	0.245715	1.17569	1.83584	0.876438	0.351909	1	up	no
76984	u	chr7	.	81127146	81128888	MSTRG.31550.1	1	1743	MSTRG.31550	.	7.22484	2.82744	1.36587	0.864763	0.999692	1.64048	1.50788	1.34581	1.00148	2.03848	1.76299	0.818025	0.351999	1	up	no
19804	i	chr13	-	61101129	61104055	MSTRG.8363.1	1	2927	MSTRG.8363	ITPR1	1.91528	0.589142	0.979128	0.707071	2.9706	0.589558	1.71568	0.402648	0.515447	0.618562	1.86398	0.898387	0.352206	1	up	no
37823	u	chr17	.	42096080	42101265	MSTRG.15916.1	1	5186	MSTRG.15916	.	0.354161	0.917635	2.01187	1.34549	0.230614	0.793844	0.20671	0.975784	0.505558	0.237936	1.78679	0.83737	0.352596	1	up	no
60302	x	chr5	-	14064242	14118540	MSTRG.24745.1	3	2610	MSTRG.24745	NUAK1	1.71844	1.47286	3.17258	2.00203	2.4669	1.58222	0.87837	1.46498	0.941742	1.60597	1.67346	0.742838	0.352751	1	up	no
27295	i	chr14	+	61897622	61897828	MSTRG.11407.1	1	207	MSTRG.11407	BICC1	5.30497	2.48404	4.7907	4.21269	4.22569	1.06218	1.79011	1.58898	2.8656	3.64335	1.91942	0.940672	0.352776	1	up	no
78498	u	chr8	-	939151	959792	MSTRG.32178.1	2	11371	MSTRG.32178	.	0.426999	1.09844	0.768932	0.89308	0.935846	2.11437	0.96489	1.9965	1.11276	0.472153	0.619052	-0.691869	0.352983	1	down	no
83561	i	chr9	-	28250481	28265496	MSTRG.34257.1	3	12369	MSTRG.34257	MAML2	0.535071	3.13059	2.18585	1.57163	1.54101	1.57862	2.25836	1.84477	4.96386	3.25471	0.644888	-0.632879	0.35306	1	down	no
11384	u	chr11	.	8370879	8371568	MSTRG.4891.1	1	690	MSTRG.4891	.	0.41614	0.583841	1.93108	0.851131	1.93775	0.053027	0.432931	0.72504	0.293652	1.19617	2.11786	1.08261	0.353164	1	up	no
47987	i	chr2	+	140521729	140522855	MSTRG.19699.1	1	1127	MSTRG.19699	HSPA9	2.49742	1.92704	2.36058	2.2874	1.72396	3.5818	2.62233	3.56129	4.40742	4.57091	0.575999	-0.795861	0.353306	1	down	no
80810	i	chr8	-	86324098	86325501	MSTRG.33153.1	1	1404	MSTRG.33153	RNF150	2.5326	0.265183	0.294807	0.593324	0.157545	0.103144	1.15447	0.017418	0.181021	0.180963	2.34784	1.23134	0.353323	1	up	no
2631	u	chr1	.	99270829	99271355	MSTRG.1175.1	1	527	MSTRG.1175	.	0.488702	0.587008	0.328436	0.916835	0.199091	0.191088	2.63773	1.9546	0.32035	0.283679	0.467767	-1.09614	0.35337	1	down	no
1789	u	chr1	-	58262876	58280856	MSTRG.777.1	1	17981	MSTRG.777	.	0.901297	2.01345	3.16456	1.73321	2.02519	1.47639	1.10691	1.67122	1.66216	0.721974	1.48188	0.567432	0.353411	1	up	no
6136	i	chr1	-	217661453	217687583	MSTRG.2627.1	2	25633	MSTRG.2627	GLIS3	0.724956	0.495146	1.25756	0.946034	1.01171	0.651878	2.06112	0.640218	0.683325	2.69219	0.659175	-0.601267	0.353521	1	down	no
49620	u	chr3	-	14597036	14602341	MSTRG.20439.1	1	5306	MSTRG.20439	.	4.66454	4.85424	3.29214	3.47977	2.59663	2.50235	1.45	2.95158	3.88356	2.0248	1.47416	0.559888	0.35381	1	up	no
35564	u	chr16	-	54689405	54764286	MSTRG.14916.1	3	34039	MSTRG.14916	.	0.219651	0.955421	2.34146	0.571853	0.395332	0.15672	1.69947	0.349813	1.98464	3.38185	0.592106	-0.756073	0.35409	1	down	no
271	i	chr1	.	6842701	6843141	MSTRG.139.1	1	441	MSTRG.139	AGPAT4	2.24456	2.73634	1.47676	2.28265	2.4413	1.229	0.74784	2.46213	0.683808	0.826678	1.87944	0.910301	0.354172	1	up	no
46384	u	chr2	-	83106269	83121259	MSTRG.18988.1	1	14991	MSTRG.18988	.	0.0001	0.0001	3.20889	1.57242	0.0001	0.0001	0.665063	0.0001	0.0001	0.0001	7.18539	2.84507	0.354178	1	up	no
74461	j	chr7	-	32087432	32093530	MSTRG.30531.1	2	5528	MSTRG.30531	ETV7	1.30423	1.01097	0.637839	3.98752	0.886744	0.934603	1.55974	0.536267	0.542443	0.941466	1.73381	0.793943	0.35428	1	up	no
12723	u	chr11	+	76919302	76920831	MSTRG.5496.1	1	1530	MSTRG.5496	.	9.60599	10.2825	6.37319	6.84465	11.2557	6.09929	4.00254	7.61927	3.93166	7.16916	1.53918	0.622161	0.354349	1	up	no
79558	o	chr8	+	41345717	41415155	MSTRG.32650.1	2	2360	MSTRG.32650	KIT	5.95925	2.92898	3.06473	3.29405	5.08367	0.0001	0.0001	4.49301	3.21867	0.0001	2.63625	1.39849	0.354451	1	up	no
26269	i	chr14	+	46898411	46940990	MSTRG.11010.1	2	1968	MSTRG.11010	MTMR3	0.158987	0.04288	4.2343	0.040963	3.77303	0.065836	0.029429	0.090685	0.043607	2.89541	2.64008	1.40058	0.354555	1	up	no
41825	o	chr2	+	8919306	8922756	MSTRG.17458.1	12	810	MSTRG.17458	RF00099	4.63883	4.48754	4.1542	4.98017	4.16612	9.40704	5.71356	8.2807	8.23789	6.14273	0.593587	-0.752468	0.354833	1	down	no
22008	u	chr13	+	129648284	129690952	MSTRG.9294.1	2	41945	MSTRG.9294	.	1.23737	1.64084	3.37706	1.86376	3.62711	1.5798	0.0001	1.90939	1.71064	1.04775	1.88008	0.910793	0.355011	1	up	no
60308	i	chr5	.	14148064	14148477	MSTRG.24750.1	1	414	MSTRG.24750	NUAK1	2.20023	1.64233	2.00923	5.13973	2.11637	1.83776	0.925986	0.515595	1.34415	2.24511	1.90838	0.932349	0.355089	1	up	no
42932	i	chr2	-	26616200	26647770	MSTRG.17804.3	2	31512	MSTRG.17804	ABTB2	0.0001	1.41319	2.65681	2.65818	0.667129	0.806285	0.0001	0.0001	1.38617	0.0001	3.37266	1.75389	0.355102	1	up	no
9706	i	chr10	-	38647449	38655164	MSTRG.4187.1	1	7716	MSTRG.4187	MOB3B	0.770579	1.28704	3.18924	1.57534	2.99272	1.1472	0.609235	1.402	2.01392	1.05966	1.57492	0.655279	0.355163	1	up	no
2351	o	chr1	-	90157697	90237463	MSTRG.1046.1	2	3432	MSTRG.1046	SENP6	0.440318	0.575199	0.107294	0.179389	0.598509	0.543174	0.012831	1.51175	0.461633	1.42376	0.480809	-1.05646	0.355251	1	down	no
19281	u	chr13	.	41755025	41788541	MSTRG.8090.1	1	33517	MSTRG.8090	.	0.364285	1.99135	0.620036	0.503294	0.3656	0.338137	0.27781	0.660547	0.705262	0.543037	1.52272	0.606654	0.355502	1	up	no
68304	i	chr6	-	63986833	63987584	MSTRG.28034.1	1	752	MSTRG.28034	CFAP74	0.18648	1.7667	0.769001	0.351963	0.857237	1.13247	1.50028	0.626239	2.46483	2.09559	0.502772	-0.992025	0.355906	1	down	no
4560	i	chr1	+	159534351	159540996	MSTRG.1923.1	1	6646	MSTRG.1923	RNF152	7.60143	1.05007	1.04322	2.53332	1.22844	0.842957	3.48168	1.0964	1.39126	1.25878	1.66725	0.737467	0.356047	1	up	no
83970	u	chr9	+	40120931	40132458	MSTRG.34425.1	1	11528	MSTRG.34425	.	7.74433	0.495442	0.460824	1.44874	0.685741	1.27548	2.37298	0.861843	0.375297	1.42311	1.71748	0.780293	0.356253	1	up	no
71587	u	chr6	-	148624765	148632555	MSTRG.29343.1	2	7108	MSTRG.29343	.	0.657647	0.482183	1.34778	1.20637	1.29115	0.618348	0.339572	0.557452	0.698013	0.803172	1.65259	0.724729	0.356262	1	up	no
27577	u	chr14	.	71902005	71902901	MSTRG.11522.1	1	897	MSTRG.11522	.	0.424907	0.477728	0.231786	0.681276	0.309505	0.671696	0.526084	1.45701	0.950767	0.577322	0.508071	-0.976897	0.356383	1	down	no
40704	i	chr18	.	52373425	52380031	MSTRG.17089.1	1	6607	MSTRG.17089	ENSSSCG00000037969	0.598031	1.10028	1.29435	0.851508	0.523582	1.64245	0.618471	1.12973	2.09707	1.75515	0.603039	-0.729676	0.356423	1	down	no
63089	i	chr5	.	71491868	71492309	MSTRG.25786.1	1	442	MSTRG.25786	SLC2A13	5.51711	1.87268	3.15996	3.18088	2.72525	1.94763	1.70957	2.11155	1.31435	1.9044	1.83097	0.872611	0.356675	1	up	no
15742	u	chr12	.	43136451	43139450	MSTRG.6616.1	1	3000	MSTRG.6616	.	0.532285	0.5943	1.7391	1.20154	0.778122	0.622059	0.397048	0.636293	0.779436	0.313214	1.76319	0.818192	0.356726	1	up	no
63766	u	chr5	-	89283853	89302389	MSTRG.26073.1	4	4357	MSTRG.26073	.	0.101308	0.317404	0.426496	0.857788	0.116512	2.20557	0.146462	1.0745	0.160256	0.147419	0.487255	-1.03725	0.356842	1	down	no
81535	o	chr8	-	121377520	121455587	MSTRG.33449.2	2	3500	MSTRG.33449	ENSSSCG00000036313	1.66635	1.665	1.82842	1.51003	2.23208	0.0001	0.0001	0.362838	1.44828	2.029	2.318	1.21288	0.356922	1	up	no
12430	u	chr11	-	62580951	62633555	MSTRG.5364.1	2	8540	MSTRG.5364	.	3.42612	0.983756	1.25123	1.12538	1.9219	1.39494	0.679435	1.19723	1.09462	1.30818	1.53468	0.617937	0.357432	1	up	no
59700	u	chr5	.	5257417	5258983	MSTRG.24502.1	1	1567	MSTRG.24502	.	0.657326	0.215303	1.09846	0.30324	0.319259	0.643306	0.987049	0.562826	0.778753	1.93327	0.528741	-0.919366	0.35745	1	down	no
64543	u	chr6	.	8707136	8710828	MSTRG.26502.1	1	3693	MSTRG.26502	.	0.937807	1.30059	1.83071	1.64924	0.984319	1.0608	0.568379	0.456442	1.04187	0.849211	1.68548	0.753162	0.357613	1	up	no
63471	i	chr5	-	81785539	81790800	MSTRG.25932.1	1	5262	MSTRG.25932	IGF1	1.60338	3.90849	1.64382	1.89057	6.81173	1.95005	0.926478	1.83475	2.4469	2.95948	1.56736	0.648335	0.357689	1	up	no
31070	i	chr15	-	45112232	45127162	MSTRG.13060.1	2	12498	MSTRG.13060	STOX2	0.873133	0.81624	1.74452	1.8492	1.39666	1.20869	3.07458	1.1522	0.531358	4.33074	0.648673	-0.624437	0.357739	1	down	no
76245	u	chr7	.	71424019	71424376	MSTRG.31303.1	1	358	MSTRG.31303	.	2.72422	2.22086	2.57597	2.27447	0.591585	0.620377	0.44011	0.377655	2.93368	0.909381	1.96681	0.975855	0.357916	1	up	no
11334	i	chr11	+	7027110	7030558	MSTRG.4860.1	1	3449	MSTRG.4860	KATNAL1	0.495075	1.72138	1.82527	1.69911	2.10054	0.803662	0.0001	1.76574	0.248874	1.07749	2.01274	1.00916	0.358008	1	up	no
49549	x	chr3	+	13566500	13804643	MSTRG.20398.1	2	14585	MSTRG.20398	RF00016	6.82412	4.2174	3.01814	2.13185	2.36612	1.97957	1.46431	4.70952	2.79271	1.82675	1.45289	0.53893	0.358422	1	up	no
14874	i	chr12	-	25923032	25926239	MSTRG.6264.1	1	3208	MSTRG.6264	FAM117A	0.979976	1.35326	1.45666	1.2418	1.32826	1.41783	3.56375	1.10872	1.19186	3.23488	0.604728	-0.725641	0.358495	1	down	no
61787	i	chr5	.	41870118	41877088	MSTRG.25279.1	1	6971	MSTRG.25279	FGD4	0.813188	0.656734	0.86903	0.731039	0.527228	0.45418	2.0287	0.510753	0.32282	2.79421	0.588679	-0.764447	0.35861	1	down	no
66500	i	chr6	.	49070923	49071655	MSTRG.27345.1	1	733	MSTRG.27345	ENSSSCG00000028627	0.465163	0.419861	0.321299	1.43633	1.22121	1.67545	2.20235	0.588853	1.60994	1.38503	0.517832	-0.949443	0.358932	1	down	no
21400	u	chr13	-	112062603	112065844	MSTRG.9017.1	1	3242	MSTRG.9017	.	2.09907	0.101676	0.121169	0.229316	0.168718	0.226058	0.58459	0.114063	0.276832	0.132019	2.03961	1.02829	0.359293	1	up	no
38885	i	chr18	-	5890466	5898145	MSTRG.16295.1	2	2987	MSTRG.16295	WDR86	0.636481	2.11755	1.14468	1.16259	0.848166	0.553733	0.247745	1.42634	0.783675	0.395979	1.73427	0.794326	0.359318	1	up	no
21083	x	chr13	-	98458305	98459852	MSTRG.8892.1	1	1548	MSTRG.8892	GFM1	2.61859	2.64253	4.31615	3.37036	3.34051	3.15738	2.39597	7.73852	11.4753	2.93933	0.587882	-0.766401	0.359351	1	down	no
9693	i	chr10	-	38495280	38498226	MSTRG.4179.1	1	2947	MSTRG.4179	MOB3B	1.1194	1.34936	2.97742	1.52952	2.94879	0.762483	0.626524	1.46695	2.1192	0.925074	1.68205	0.750222	0.359548	1	up	no
49621	u	chr3	+	14608317	14633794	MSTRG.20440.1	2	9470	MSTRG.20440	.	3.78924	4.05943	3.08272	3.25981	2.58966	2.17997	1.62061	2.56733	3.41276	1.92216	1.43392	0.51996	0.359688	1	up	no
30580	u	chr15	-	16817437	16825254	MSTRG.12840.1	2	6873	MSTRG.12840	.	0.524202	0.474386	2.25015	0.606431	0.554709	0.479554	0.447503	0.576522	0.61604	0.460037	1.70948	0.773559	0.359716	1	up	no
37685	u	chr17	-	40020106	40020680	MSTRG.15854.1	1	575	MSTRG.15854	.	2.94953	4.20365	2.18799	3.06606	3.66859	5.10869	7.57588	2.64528	7.69558	5.13212	0.570924	-0.808629	0.360067	1	down	no
1139	u	chr1	-	31608618	31609184	MSTRG.503.1	1	567	MSTRG.503	.	0.575084	1.04404	0.381429	0.763803	0.797097	1.43805	0.543096	1.6941	1.49738	1.80792	0.510197	-0.970873	0.36011	1	down	no
70254	i	chr6	.	96432064	96432798	MSTRG.28755.1	1	735	MSTRG.28755	LDLRAD4	0.788288	0.702273	1.79035	0.690679	2.30517	0.412663	0.787356	0.594142	0.367634	1.04611	1.95665	0.968386	0.360303	1	up	no
72561	u	chr6	-	169803332	169821813	MSTRG.29772.2	2	5383	MSTRG.29772	.	2.48224	0.12257	0.139036	0.28742	0.204886	0.268566	0.880083	0.270243	0.095281	0.023853	2.10409	1.0732	0.360354	1	up	no
54042	i	chr3	.	114970669	114982589	MSTRG.22272.1	1	11921	MSTRG.22272	KLHL29	1.59791	0.907973	1.2615	1.5219	2.0284	0.836094	0.888536	1.09052	1.04665	1.02493	1.49746	0.582518	0.360384	1	up	no
8822	u	chr10	.	17457508	17459232	MSTRG.3781.1	1	1725	MSTRG.3781	.	0.391544	0.48944	0.71752	0.643539	0.545438	0.855067	0.628418	0.684332	2.16544	0.767588	0.546474	-0.871775	0.36071	1	down	no
12268	o	chr11	+	47661375	47807437	MSTRG.5309.2	7	56337	MSTRG.5309	ENSSSCG00000039665	2.15953	1.0876	0.379475	0.290314	1.36523	1.36567	2.48702	1.93853	1.64474	0.795418	0.641708	-0.640011	0.360739	1	down	no
31338	u	chr15	+	52122641	52202285	MSTRG.13148.1	2	2750	MSTRG.13148	.	0.432996	0.699057	0.681516	1.39828	1.35949	2.17636	0.83027	1.95979	1.41998	1.59307	0.572888	-0.803676	0.360755	1	down	no
10322	i	chr10	+	50969344	50985038	MSTRG.4470.1	3	11265	MSTRG.4470	KIAA1217	2.33615	2.02012	1.85601	2.76842	2.89541	3.39713	3.39633	3.59465	2.92205	4.02384	0.685134	-0.545542	0.360872	1	down	no
90557	u	chrY	+	8050732	8321668	MSTRG.37068.1	3	4462	MSTRG.37068	.	0.710713	0.847053	0.927416	0.667077	3.6148	0.547539	0.258036	0.830149	1.4255	0.841338	1.734	0.794106	0.361452	1	up	no
77356	j	chr7	+	93394140	93404308	MSTRG.31707.14	6	8958	MSTRG.31707	SRSF5	0.0001	0.187598	0.056208	0.038177	0.098846	0.052343	0.035139	0.063223	0.006806	0.003922	2.35967	1.23859	0.361526	1	up	no
55023	u	chr4	.	15422679	15423180	MSTRG.22652.1	1	502	MSTRG.22652	.	1.85377	2.54667	1.40692	2.36382	2.34202	1.06808	0.670342	1.58532	1.39121	1.05729	1.82134	0.864999	0.361657	1	up	no
8852	i	chr10	-	17772064	17784976	MSTRG.3799.1	2	7971	MSTRG.3799	KIF26B	1.08155	0.520189	2.70437	2.04057	0.847612	1.05822	0.600239	1.00312	1.38745	0.421833	1.60915	0.6863	0.362108	1	up	no
46475	i	chr2	-	85426457	85434050	MSTRG.19035.1	2	6912	MSTRG.19035	IQGAP2	8.33738	3.09811	1.1789	1.70978	1.47591	2.04802	3.01799	2.01978	1.82326	1.26417	1.5531	0.635155	0.36214	1	up	no
37819	i	chr17	.	42082592	42084836	MSTRG.15912.1	1	2245	MSTRG.15912	DHX35	0.550227	1.30604	2.57171	2.09327	0.355968	1.55209	0.317038	1.18361	0.512096	0.197207	1.82805	0.870308	0.362303	1	up	no
36261	i	chr17	-	5321352	5322482	MSTRG.15243.1	1	1131	MSTRG.15243	PDGFRL	0.68757	0.691695	1.74608	0.971281	0.665435	0.251094	0.243965	0.456541	0.961196	0.623071	1.87788	0.909107	0.362348	1	up	no
68306	i	chr6	.	63991254	63991995	MSTRG.28035.1	1	742	MSTRG.28035	CFAP74	0.235823	1.44473	0.188916	0.987429	0.671608	0.738735	1.36982	0.663399	2.03496	2.21281	0.502656	-0.992357	0.362583	1	down	no
70696	i	chr6	-	108193535	108204955	MSTRG.28970.1	2	8788	MSTRG.28970	CABLES1	0.660163	1.44542	1.21258	1.67209	1.21201	2.96253	0.747813	3.12556	1.17926	1.79818	0.632024	-0.661949	0.362708	1	down	no
78904	i	chr8	-	12370022	12379081	MSTRG.32339.1	1	9060	MSTRG.32339	QDPR	0.379508	0.69985	0.404268	1.83225	0.644883	1.92587	0.567928	1.59956	1.42299	1.04148	0.603974	-0.727441	0.362801	1	down	no
89758	u	chrX	.	106662409	106662808	MSTRG.36776.1	1	400	MSTRG.36776	.	2.61929	1.71766	1.39348	2.6337	1.24664	1.03225	0.34471	1.36205	1.22642	1.19865	1.86108	0.89614	0.362947	1	up	no
37814	i	chr17	+	42014515	42019156	MSTRG.15907.1	2	3981	MSTRG.15907	DHX35	0.611674	2.09767	3.28458	2.37475	0.623281	1.572	0.443651	1.66582	0.913449	0.749371	1.68253	0.750636	0.362992	1	up	no
68525	u	chr6	-	69603713	69628086	MSTRG.28108.1	4	7776	MSTRG.28108	.	1.45462	0.433595	1.28645	1.92888	0.860638	2.07256	0.197239	1.70085	3.24372	2.88986	0.590266	-0.760564	0.363022	1	down	no
74528	u	chr7	.	32997225	32997819	MSTRG.30563.1	1	595	MSTRG.30563	.	1.42559	1.32553	0.763834	1.76727	1.5129	0.462635	0.135946	0.420988	1.69163	0.824689	1.92175	0.942423	0.363046	1	up	no
35948	i	chr16	-	72179715	72182620	MSTRG.15113.1	1	2906	MSTRG.15113	CMBL	0.002455	1.01121	1.08751	1.2109	1.21406	2.24015	1.16283	1.7701	1.33792	2.14517	0.522881	-0.935447	0.363219	1	down	no
35786	u	chr16	.	67731052	67731884	MSTRG.15048.1	1	833	MSTRG.15048	.	0.157546	1.06296	0.23538	0.310098	1.09174	1.75859	0.254195	2.46311	0.516038	0.937802	0.481933	-1.0531	0.363621	1	down	no
34333	u	chr16	-	6387677	6438229	MSTRG.14316.1	1	50553	MSTRG.14316	.	0.072562	0.213434	0.143206	0.163335	0.084499	0.177052	0.023845	0.053467	0.091263	0.0001	1.9583	0.969599	0.363781	1	up	no
22759	i	chr13	-	145383889	145405380	MSTRG.9641.2	2	21326	MSTRG.9641	ZBTB20	0.878663	0.0001	1.19573	0.791336	0.0001	2.10955	1.69765	0.839574	0.922579	0.939512	0.440313	-1.1834	0.363848	1	down	no
77038	u	chr7	.	83238149	83241176	MSTRG.31539.1	1	3028	MSTRG.31539	.	0.732284	0.608069	1.67144	1.80865	1.18576	0.446801	0.837291	0.308571	1.44456	0.325606	1.78606	0.836777	0.363969	1	up	no
77918	i	chr7	+	111122554	111148529	MSTRG.31935.1	3	24535	MSTRG.31935	FOXN3	0.997267	1.75293	2.04208	1.12506	2.72653	1.06058	0.78863	1.0236	1.45071	1.59816	1.4597	0.545669	0.364205	1	up	no
55191	i	chr4	-	20724182	20726012	MSTRG.22727.1	1	1831	MSTRG.22727	EXT1	1.25861	1.34135	0.103056	0.551393	1.73862	0.958737	0.473599	0.342827	0.0001	0.58629	2.1143	1.08018	0.364799	1	up	no
23467	o	chr13	+	180980953	181322435	MSTRG.9891.3	7	21991	MSTRG.9891	ssc-let-7c	0.109336	0.109353	0.806176	0.132255	0.542041	0.401831	0.013947	0.118866	0.141506	0.257283	1.82034	0.864204	0.364895	1	up	no
69196	i	chr6	-	81004541	81047259	MSTRG.28381.1	3	9212	MSTRG.28381	LUZP1	2.29063	1.25489	3.0533	1.1908	1.67739	1.14784	1.17229	1.99009	0.827651	1.12285	1.51213	0.596581	0.365076	1	up	no
31088	x	chr15	+	45567969	45622746	MSTRG.13067.1	2	1766	MSTRG.13067	IRF2	2.71348	2.50952	4.4519	2.75978	2.68078	1.94032	1.98879	0.0001	2.86167	0.827991	1.98395	0.988376	0.365296	1	up	no
83631	x	chr9	-	32786528	32833225	MSTRG.34292.1	2	3822	MSTRG.34292	YAP1	2.80229	3.95394	5.83026	3.48909	4.83657	3.70346	0.0001	0.0001	4.36224	0.0001	2.59263	1.37442	0.365908	1	up	no
49617	u	chr3	-	14571919	14574528	MSTRG.20437.1	2	2577	MSTRG.20437	.	4.96756	0.755556	0.68355	0.67972	0.720181	0.592418	0.348673	0.580507	2.40093	0.450833	1.78503	0.835945	0.366057	1	up	no
76305	i	chr7	.	72907815	72916550	MSTRG.31315.1	1	8736	MSTRG.31315	NOVA1	0.664715	0.989273	0.632739	0.512511	0.853074	1.86708	0.538209	1.26226	1.32803	0.958066	0.613459	-0.70496	0.366369	1	down	no
53142	i	chr3	+	94640237	94645939	MSTRG.21897.1	1	5703	MSTRG.21897	PRKCE	0.03688	0.614644	0.531335	0.523057	2.60753	2.47389	0.435112	0.62626	4.17853	0.477578	0.526585	-0.925262	0.366448	1	down	no
33093	u	chr15	.	109628840	109632939	MSTRG.13863.1	1	4100	MSTRG.13863	.	0.591196	0.50749	2.01792	0.916467	0.802519	0.52614	0.291589	0.378156	1.12781	0.461286	1.73631	0.796026	0.366517	1	up	no
32971	i	chr15	+	106030479	106039247	MSTRG.13805.1	2	6791	MSTRG.13805	BMPR2	2.4334	2.08818	2.88558	2.47127	2.28119	1.71935	2.15346	0.86112	2.25989	0.991165	1.52281	0.606737	0.366599	1	up	no
44969	o	chr2	-	69389781	69423758	MSTRG.18494.1	2	4585	MSTRG.18494	ENSSSCG00000033615	3.42228	0.272602	0.316951	0.313583	0.159101	0.334727	0.359502	3.51061	2.553	2.34274	0.492773	-1.021	0.366714	1	down	no
70095	o	chr6	-	94916330	95090659	MSTRG.28782.1	3	10775	MSTRG.28782	RF00026	1.18108	2.23075	2.83366	1.61903	2.36472	1.17476	1.48511	2.2411	0.919482	1.04216	1.49058	0.575871	0.366861	1	up	no
81435	o	chr8	+	118107928	118115760	MSTRG.33414.5	2	2361	MSTRG.33414	ENSSSCG00000009162	1.10407	1.39492	1.12759	1.3439	2.08383	1.03211	0.506629	0.933871	1.09342	0.599377	1.69355	0.76005	0.366863	1	up	no
50277	i	chr3	+	25874296	25880882	MSTRG.20723.1	2	4673	MSTRG.20723	GPRC5B	13.8709	2.81436	2.19649	3.15273	2.10876	2.4206	4.89551	2.76155	2.66205	2.75771	1.55789	0.639591	0.367185	1	up	no
82908	i	chr9	+	8709891	8711168	MSTRG.33981.1	1	1278	MSTRG.33981	PGM2L1	0.742002	0.883612	2.51481	2.12503	1.03808	0.912261	0.608121	0.922048	1.04041	0.666245	1.76028	0.815802	0.3672	1	up	no
65668	x	chr6	-	37697939	37737797	MSTRG.27017.1	2	10786	MSTRG.27017	C16orf87	1.73736	1.91065	0.443361	0.448108	1.07238	4.2259	0.657902	1.64161	0.892939	1.90869	0.601676	-0.732941	0.367457	1	down	no
39530	u	chr18	.	16355753	16356775	MSTRG.16561.1	1	1023	MSTRG.16561	.	1.33153	0.538718	1.86097	0.59896	0.78673	0.79888	0.139821	0.524034	0.395232	0.874452	1.87266	0.905093	0.367581	1	up	no
86124	i	chr9	-	106888642	106902878	MSTRG.35232.1	1	14237	MSTRG.35232	PRKAR2B	7.04891	8.36432	2.21066	3.74508	4.20641	3.69894	2.70632	4.23227	5.46771	1.63743	1.44146	0.527532	0.367726	1	up	no
42013	i	chr2	-	9199662	9212366	MSTRG.17581.6	6	1429	MSTRG.17581	ENSSSCG00000036669	1.73437	1.28571	2.14295	6.41734	0.654203	3.60662	0.511801	5.44165	3.67271	9.2449	0.544298	-0.87753	0.367858	1	down	no
88224	i	chrX	.	43650458	43650946	MSTRG.36106.1	1	489	MSTRG.36106	CLCN5	2.25169	2.6473	1.66795	1.40087	2.27628	1.27513	1.28979	1.1981	1.12517	0.725667	1.82479	0.867727	0.368047	1	up	no
84454	i	chr9	-	50292988	50301445	MSTRG.34609.1	1	8458	MSTRG.34609	GRAMD1B	5.00981	1.81051	0.49044	1.16516	1.4572	0.683693	2.58201	1.3763	1.03693	0.332029	1.65251	0.724655	0.368048	1	up	no
27446	i	chr14	+	66848367	66866794	MSTRG.11476.1	2	4046	MSTRG.11476	JMJD1C	0.873095	1.53635	1.06848	1.72448	1.20342	3.37496	1.84624	1.3415	1.5226	2.33273	0.614879	-0.701627	0.368257	1	down	no
5839	i	chr1	+	202357098	202421412	MSTRG.2505.1	2	61079	MSTRG.2505	MLLT3	0.570379	4.13276	0.717297	0.608601	0.737414	1.00864	0.434679	1.21379	1.19547	0.649612	1.50293	0.587774	0.368301	1	up	no
71897	i	chr6	-	157941484	157948692	MSTRG.29494.4	2	6272	MSTRG.29494	SSBP3	0.439971	0.387294	0.0001	0.429188	0.0001	0.313476	0.39376	1.48375	0.462613	0.414571	0.409577	-1.28779	0.368312	1	down	no
53478	i	chr3	-	102231920	102232392	MSTRG.22030.1	1	473	MSTRG.22030	ENSSSCG00000008488	13.65	1.30548	0.519079	1.73942	0.095996	1.08223	2.85567	0.87819	1.8913	1.64482	2.0725	1.05137	0.368394	1	up	no
49619	u	chr3	-	14583440	14595951	MSTRG.20438.1	2	12491	MSTRG.20438	.	4.0809	4.12946	3.2272	3.3809	2.70733	2.58868	1.48999	2.62829	3.55761	2.11927	1.41521	0.50102	0.368505	1	up	no
81985	i	chr8	.	133156377	133159628	MSTRG.33665.1	1	3252	MSTRG.33665	ARHGAP24	0.622837	0.65998	0.711516	0.86833	0.77921	1.04041	1.64432	1.74447	1.02808	0.740862	0.587576	-0.767153	0.368624	1	down	no
78274	x	chr7	-	121079142	121143533	MSTRG.32078.1	2	1746	MSTRG.32078	YY1	1.27893	0.847842	0.0001	0.0001	0.0001	2.2959	2.14276	2.61437	0.0001	0.134236	0.295946	-1.7566	0.368725	1	down	no
68308	i	chr6	.	64000275	64001277	MSTRG.28037.1	1	1003	MSTRG.28037	CFAP74	0.471716	1.97501	0.862794	0.926849	1.4622	2.1168	1.35241	1.30107	3.09268	2.42835	0.553726	-0.852756	0.368917	1	down	no
31362	i	chr15	.	52739544	52740948	MSTRG.13163.1	1	1405	MSTRG.13163	NRG1	0.423088	0.532368	0.453236	0.573622	1.38273	1.46672	0.849233	2.59145	0.810969	0.494648	0.541611	-0.88467	0.369151	1	down	no
71581	u	chr6	+	148548231	148556605	MSTRG.29339.1	1	8375	MSTRG.29339	.	1.72714	1.07546	2.93775	2.62052	2.64849	1.36477	1.04999	1.54628	1.96012	1.4681	1.48992	0.57523	0.369222	1	up	no
89054	u	chrX	+	76115723	76127683	MSTRG.36479.4	2	10256	MSTRG.36479	.	0.568789	0.800915	0.592127	0.394856	0.648023	0.629459	0.310855	1.62878	2.29072	0.298654	0.582481	-0.779717	0.369235	1	down	no
22617	u	chr13	.	141702737	141721362	MSTRG.9534.1	1	18626	MSTRG.9534	.	2.1367	0.011206	0.006432	0.088458	0.001201	0.008849	0.755309	0.025021	0.016995	0.008043	2.75602	1.46259	0.369492	1	up	no
2141	x	chr1	+	77400811	77428030	MSTRG.956.4	4	9391	MSTRG.956	REV3L	0.169851	0.398676	0.00345	0.007241	2.1452	2.08637	0.795336	1.1659	1.81192	0.040659	0.461751	-1.11481	0.369658	1	down	no
8440	i	chr10	-	10008187	10024717	MSTRG.3605.1	2	14510	MSTRG.3605	MARK1	2.58896	4.08472	2.52416	2.59716	2.99451	2.77211	1.15193	0.688313	3.7936	1.71362	1.46148	0.547426	0.369688	1	up	no
62159	i	chr5	+	52578750	52590705	MSTRG.25423.1	2	7662	MSTRG.25423	PDE3A	1.56205	1.2796	2.65288	2.11125	2.36324	1.06608	1.26046	1.20952	1.3106	1.71824	1.51853	0.602679	0.369705	1	up	no
40176	i	chr18	+	39020897	39035093	MSTRG.16873.1	2	14163	MSTRG.16873	NPSR1	3.1406	1.29372	0.0001	0.0001	1.6e-05	0.078604	0.0001	0.0001	0.0001	0.954462	4.29135	2.10143	0.369731	1	up	no
56212	i	chr4	+	65645502	65649475	MSTRG.23162.1	1	3974	MSTRG.23162	SULF1	2.06616	1.10996	3.02731	3.41883	3.55555	1.6318	1.4793	1.99719	1.6827	1.58986	1.57237	0.652941	0.369781	1	up	no
82027	i	chr8	+	135023393	135023845	MSTRG.33675.1	1	453	MSTRG.33675	MRPS18C	3.95962	3.06424	2.99982	2.5381	1.29911	1.87014	0.762845	2.00976	1.8391	1.26279	1.78974	0.839751	0.369802	1	up	no
14299	i	chr12	-	20407561	20436176	MSTRG.6077.1	2	5079	MSTRG.6077	STAT3	3.85984	2.77573	4.53719	4.14803	5.09244	2.5264	0.008321	3.02511	3.33472	3.18628	1.68972	0.756784	0.370008	1	up	no
74997	i	chr7	.	41087778	41088335	MSTRG.30752.1	1	558	MSTRG.30752	RCAN2	2.82394	1.742	4.4007	2.52839	2.92188	1.86018	1.74456	1.83537	0.962468	1.6932	1.78079	0.832521	0.370024	1	up	no
51744	i	chr3	.	53160012	53160735	MSTRG.21312.1	1	724	MSTRG.21312	TBC1D8	1.50283	1.79495	2.23869	2.97621	2.0078	1.21642	1.72869	1.08136	1.32285	0.413819	1.82548	0.868272	0.37008	1	up	no
16152	u	chr12	.	47587351	47597368	MSTRG.6812.1	1	10018	MSTRG.6812	.	0.963964	1.32174	1.19263	1.59885	1.09014	1.87071	2.00866	1.68434	1.91923	1.69974	0.671626	-0.57427	0.3702	1	down	no
65671	j	chr6	+	37724024	37763277	MSTRG.27019.2	4	2090	MSTRG.27019	C16orf87	0.249124	0.211709	0.200429	0.162166	0.476402	0.45758	0.116536	1.08557	0.615706	0.278099	0.50904	-0.974148	0.370246	1	down	no
84655	i	chr9	+	53087604	53095111	MSTRG.34656.1	1	7508	MSTRG.34656	CDON	1.79567	2.78136	1.24665	2.11941	1.74174	2.79508	2.0758	1.80001	2.57739	5.43216	0.65971	-0.600096	0.370756	1	down	no
9648	u	chr10	.	33506534	33507140	MSTRG.4156.1	1	607	MSTRG.4156	.	0.754158	0.607617	0.464157	0.662124	0.659613	1.20893	1.72696	0.407774	1.5801	1.04868	0.527033	-0.924034	0.371354	1	down	no
76992	u	chr7	-	81185235	81191477	MSTRG.31556.2	2	4295	MSTRG.31556	.	3.99968	0.537059	0.0001	0.0001	0.0001	0.0001	0.0001	0.841036	0.0001	0.0001	5.39202	2.43083	0.37136	1	up	no
54723	i	chr4	-	2718689	2736178	MSTRG.22521.1	2	6449	MSTRG.22521	PTK2	1.42095	1.53266	0.852049	0.716653	1.55278	0.601576	0.0001	1.76449	0.0001	0.0001	2.56727	1.36023	0.371473	1	up	no
16613	o	chr12	-	52420231	52424468	MSTRG.7012.1	4	1286	MSTRG.7012	ssc-mir-195	0.911757	3.83555	1.32293	1.65055	2.50109	4.64811	0.927041	3.617	4.36997	4.57878	0.563471	-0.827586	0.371756	1	down	no
3123	u	chr1	.	114121595	114204134	MSTRG.1358.1	1	82540	MSTRG.1358	.	0.288034	0.50207	0.895556	0.530802	0.385236	0.375305	0.841476	0.307742	0.126722	2.45935	0.632924	-0.659895	0.371785	1	down	no
54765	u	chr4	-	3959512	3963455	MSTRG.22515.1	2	1632	MSTRG.22515	.	5.16111	2.76192	1.35428	0.437473	6.78842	1.50406	0.554588	3.44141	2.76008	1.21742	1.74129	0.800159	0.371801	1	up	no
12428	u	chr11	+	62494882	62548441	MSTRG.5362.1	2	4539	MSTRG.5362	.	7.32793	2.055	2.52538	2.84971	4.23939	2.98362	1.51796	2.83797	2.4323	2.96312	1.49175	0.577008	0.371922	1	up	no
30253	u	chr15	.	90629	92118	MSTRG.12680.1	1	1490	MSTRG.12680	.	0.290677	1.67146	0.131007	0.136347	0.609588	1.58925	0.113814	1.18019	1.45962	1.47161	0.488276	-1.03423	0.372024	1	down	no
89505	u	chrX	+	95010617	95013957	MSTRG.36654.1	1	3341	MSTRG.36654	.	1.56239	2.52622	0.012821	1.9896	2.20527	0.0001	0.717486	2.19443	0.0001	0.0001	2.8488	1.51035	0.372205	1	up	no
22717	u	chr13	+	144822227	144870134	MSTRG.9628.1	2	8262	MSTRG.9628	.	0.078677	0.09799	0.186873	0.14378	0.11861	0.126169	0.12351	0.118474	0.690432	0.107609	0.536729	-0.897735	0.372437	1	down	no
81969	i	chr8	-	132961865	132973127	MSTRG.33649.1	1	11263	MSTRG.33649	ARHGAP24	0.7136	0.577244	0.987334	1.28859	0.724782	1.369	1.85682	1.43406	0.91102	0.967978	0.656313	-0.607543	0.37245	1	down	no
66986	u	chr6	.	53457491	53458276	MSTRG.27567.1	1	786	MSTRG.27567	.	0.332946	0.447016	1.15932	0.641089	0.631329	1.33603	0.737063	0.65782	1.77454	1.5502	0.530364	-0.914944	0.37252	1	down	no
90519	u	chrY	+	7018545	7019136	MSTRG.37035.1	1	592	MSTRG.37035	.	1.28332	1.0963	0.984192	1.3906	1.63151	1.9454	1.38376	1.22097	6.5845	1.09268	0.522267	-0.937139	0.372935	1	down	no
50559	u	chr3	.	32642736	32644317	MSTRG.20857.1	1	1582	MSTRG.20857	.	0.377713	0.831153	0.293887	1.85427	0.215981	0.091431	0.428091	0.124549	0.952709	0.193317	1.99599	0.997102	0.373015	1	up	no
2556	i	chr1	+	97653335	97654396	MSTRG.1123.1	1	1062	MSTRG.1123	ZBTB7C	4.21467	0.040336	0.309402	0.815586	0.301578	0.0908	1.14395	0.087997	0.135641	1.03385	2.27971	1.18885	0.373289	1	up	no
28684	i	chr14	.	104961048	104961591	MSTRG.12022.1	1	544	MSTRG.12022	CEP55	0.774484	0.690829	0.34186	0.169178	0.605436	1.99417	0.242842	1.70632	1.0429	0.408176	0.478605	-1.06309	0.373314	1	down	no
57228	i	chr4	-	92266587	92287999	MSTRG.23528.3	2	18965	MSTRG.23528	KIRREL1	2.96862	2.74987	5.23745	2.02376	2.59214	1.62644	2.0784	1.46834	2.32387	3.2436	1.4498	0.535859	0.373663	1	up	no
62168	u	chr5	.	52738319	52738960	MSTRG.25431.1	1	642	MSTRG.25431	.	1.58313	1.29403	2.36239	1.74057	1.8022	0.046124	0.511514	1.18959	0.843683	1.92887	1.94308	0.958345	0.373699	1	up	no
28662	i	chr14	.	104432568	104432989	MSTRG.12018.1	1	422	MSTRG.12018	EXOC6	0.393118	0.447656	1.08729	0.276094	0.807683	2.15327	0.928783	2.03363	0.085157	1.01423	0.484602	-1.04513	0.373715	1	down	no
47188	i	chr2	-	116657630	116662224	MSTRG.19343.1	1	4595	MSTRG.19343	MCC	3.01614	1.74407	2.79864	2.09739	1.71591	1.23882	1.66961	1.22457	1.68955	1.52664	1.5474	0.629849	0.373755	1	up	no
63630	u	chr5	.	86065973	86067191	MSTRG.25998.1	1	1219	MSTRG.25998	.	0.0001	1.0819	0.060424	0.035741	0.0001	0.075458	1.99516	0.0001	0.38111	1.08733	0.332922	-1.58675	0.373982	1	down	no
30004	i	chr14	.	135244580	135245447	MSTRG.12549.1	1	868	MSTRG.12549	FANK1	0.275758	0.774047	1.09875	0.402307	0.235774	0.655333	0.863345	0.934366	1.00825	1.87324	0.522376	-0.936839	0.373985	1	down	no
88471	u	chrX	.	51263860	51265497	MSTRG.36235.1	1	1638	MSTRG.36235	.	0.439426	0.798471	0.795601	0.280831	0.879829	0.955177	0.858942	0.883733	1.00985	1.94417	0.56515	-0.823295	0.374077	1	down	no
30002	i	chr14	.	135230821	135231496	MSTRG.12547.1	1	676	MSTRG.12547	FANK1	0.394467	1.77701	0.888685	0.407464	0.547906	1.23577	1.37235	1.3721	1.75745	1.86756	0.527996	-0.921401	0.374117	1	down	no
74975	i	chr7	+	40755646	40783787	MSTRG.30737.1	2	1183	MSTRG.30737	CLIC5	0.330847	0.379998	0.271995	0.930282	0.285536	0.397445	2.23657	0.473683	0.05455	1.12812	0.512464	-0.964478	0.374415	1	down	no
65537	i	chr6	.	32516256	32517198	MSTRG.26942.1	1	943	MSTRG.26942	TOX3	0.250042	0.620343	0.321856	0.333279	0.554766	0.149398	0.983621	0.386773	0.284922	2.3431	0.501537	-0.995571	0.374436	1	down	no
48492	u	chr2	-	150524321	150525964	MSTRG.19925.1	1	1644	MSTRG.19925	.	0.674514	0.824059	1.19996	1.43814	1.41806	1.81093	0.545061	1.3444	1.49005	4.71446	0.560805	-0.834428	0.374458	1	down	no
83628	u	chr9	.	32726194	32728677	MSTRG.34289.1	1	2484	MSTRG.34289	.	0.193594	0.431619	1.05221	0.679649	0.577631	0.553049	1.5584	0.568406	0.48314	2.00198	0.568194	-0.815544	0.375068	1	down	no
53458	x	chr3	+	102046733	102079392	MSTRG.22020.1	3	6844	MSTRG.22020	RF00026	1.23861	0.648527	1.27111	5.05788	4.95234	2.49258	0.824438	3.47487	0.884429	0.358793	1.63887	0.712697	0.375249	1	up	no
65714	u	chr6	-	38262912	38265968	MSTRG.27042.1	1	3057	MSTRG.27042	.	0.018837	0.371496	0.019819	0.023241	0.018135	0.01296	0.0001	0.861933	0.134411	0.203555	0.372253	-1.42564	0.375392	1	down	no
53157	i	chr3	+	94782708	94793827	MSTRG.21902.1	2	11064	MSTRG.21902	PRKCE	0.75177	1.9593	0.472063	0.452532	2.60809	1.65602	0.650295	5.04311	2.09492	0.888292	0.604275	-0.726724	0.375487	1	down	no
30016	i	chr14	+	135381193	135390975	MSTRG.12558.1	1	9783	MSTRG.12558	ADAM12	4.47926	2.27961	2.92366	1.47237	2.82176	1.86755	1.67671	3.2403	1.51152	1.35109	1.44878	0.534843	0.375526	1	up	no
68582	o	chr6	+	70510578	70531191	MSTRG.28159.6	2	20294	MSTRG.28159	KIF1B	2.084	1.49499	1.91767	1.44486	1.96765	1.07311	0.885784	1.12759	2.16234	0.999445	1.42586	0.511831	0.375729	1	up	no
68534	i	chr6	+	69757969	69759837	MSTRG.28114.1	2	966	MSTRG.28114	SPSB1	1.01907	1.48303	2.05552	2.87353	2.89563	1.33487	0.823727	1.01968	0.643715	2.02511	1.76614	0.820599	0.375794	1	up	no
10319	i	chr10	-	50909269	50914490	MSTRG.4467.1	2	3365	MSTRG.4467	KIAA1217	1.42964	1.31243	0.852752	1.52379	1.46151	2.49642	1.99016	1.92987	1.56813	2.68241	0.616867	-0.696968	0.375861	1	down	no
70161	i	chr6	.	95328035	95329692	MSTRG.28718.1	1	1658	MSTRG.28718	ENSSSCG00000032082	1.57623	0.693189	1.96312	0.805461	1.72229	0.690701	0.578655	0.951036	1.25306	0.427681	1.7329	0.793192	0.375891	1	up	no
43014	i	chr2	+	28029574	28038596	MSTRG.17850.1	2	8894	MSTRG.17850	QSER1	3.86873	3.69449	4.81234	3.7021	3.20451	4.38035	0.0001	0.0001	3.18603	0.0001	2.5483	1.34954	0.376012	1	up	no
65580	i	chr6	-	34626059	34637618	MSTRG.26964.1	2	8762	MSTRG.26964	TENT4B	1.97788	1.54174	3.32924	2.05311	1.51067	1.40626	1.18319	1.4008	2.02984	1.04426	1.47397	0.559706	0.376249	1	up	no
54811	i	chr4	-	7879033	7880883	MSTRG.22553.1	1	1851	MSTRG.22553	ST3GAL1	3.03009	3.19803	1.60942	2.04205	2.46927	1.34434	1.5499	1.5369	1.66238	1.43658	1.63993	0.713638	0.376316	1	up	no
5811	i	chr1	+	201758350	201758892	MSTRG.2494.1	1	543	MSTRG.2494	ENSSSCG00000036906	0.0001	4.8041	0.0001	0.0001	0.0001	5.62948	0.0001	3.35116	3.97931	5.46308	0.260786	-1.93906	0.376422	1	down	no
64371	i	chr6	-	3787584	3791674	MSTRG.26392.1	1	4091	MSTRG.26392	ZDHHC7	2.02599	1.87966	1.57969	1.04473	1.96749	1.73811	0.215012	0.304907	2.21	0.660416	1.65695	0.728527	0.376607	1	up	no
4530	i	chr1	+	158450420	158487064	MSTRG.1911.1	2	35781	MSTRG.1911	KDSR	1.81008	1.75964	4.36728	2.71289	2.6081	1.83929	0.857232	2.28046	2.36879	1.99647	1.41914	0.50502	0.376913	1	up	no
90540	u	chrY	+	7256015	7269582	MSTRG.37056.1	2	9052	MSTRG.37056	.	5.61551	0.478972	0.504396	0.608208	0.232913	0.43614	2.48897	0.430598	0.341882	0.336282	1.84438	0.883137	0.377086	1	up	no
88827	i	chrX	.	60167116	60167501	MSTRG.36378.1	1	386	MSTRG.36378	ABCB7	0.955264	1.40295	2.21769	0.479813	2.85931	1.13658	1.04453	0.617256	0.532845	0.709334	1.9589	0.970045	0.377201	1	up	no
61785	i	chr5	-	41823353	41832724	MSTRG.25277.1	1	9372	MSTRG.25277	FGD4	0.679971	0.665854	0.87673	0.716823	0.572336	0.528227	1.81903	0.433936	0.425345	2.43419	0.622564	-0.683706	0.377333	1	down	no
35033	u	chr16	.	38702422	38713060	MSTRG.14652.1	1	10639	MSTRG.14652	.	0.412942	0.447446	0.8982	0.341358	0.270051	0.350609	1.36438	0.210503	0.21822	1.84627	0.593987	-0.751497	0.377435	1	down	no
77494	i	chr7	-	96496067	96497959	MSTRG.31763.2	2	1293	MSTRG.31763	PSEN1	0.0001	0.0001	0.0001	0.740711	0.0001	1.30317	1.11626	0.730212	0.0001	0.0001	0.235285	-2.08752	0.377667	1	down	no
31429	i	chr15	+	54653271	54715172	MSTRG.13206.2	4	10526	MSTRG.13206	RBPMS	0.213606	2.20125	5.15779	4.34715	5.99747	0.50272	0.739516	1.4706	0.0001	6.03923	2.04718	1.03364	0.377716	1	up	no
42835	i	chr2	+	24923364	24975045	MSTRG.17759.2	2	19855	MSTRG.17759	LDLRAD3	1.32448	0.703429	1.27123	0.935956	2.17567	2.73319	0.919713	2.48751	0.987916	2.49126	0.666429	-0.585477	0.377796	1	down	no
1756	i	chr1	.	57464384	57470293	MSTRG.759.1	1	5910	MSTRG.759	ANKRD6	1.72664	2.82056	1.94022	1.63651	1.92609	2.70928	2.19921	2.86472	3.33056	4.02526	0.664287	-0.590122	0.377825	1	down	no
35055	u	chr16	.	39147623	39148693	MSTRG.14673.1	1	1071	MSTRG.14673	.	0.203936	0.248635	1.10982	0.164398	0.121434	0.180073	1.51138	0.318693	0.040265	1.77766	0.482808	-1.05048	0.377906	1	down	no
5795	o	chr1	-	201688574	201713159	MSTRG.2486.12	4	6523	MSTRG.2486	ENSSSCG00000035294	0.0001	0.254493	0.0001	0.0001	0.234618	0.435485	0.0001	0.31461	0.0001	1.0707	0.26876	-1.89561	0.377921	1	down	no
1418	u	chr1	.	41913061	41916420	MSTRG.619.1	1	3360	MSTRG.619	.	1.88006	0.088792	0.045088	0.041037	0.090928	0.047323	0.521722	0.203323	0.159611	0.012738	2.27148	1.18363	0.378113	1	up	no
26140	u	chr14	+	45805778	45819677	MSTRG.10976.4	2	12111	MSTRG.10976	.	0.0001	6.06781	0.0001	0.0001	3.94886	1.74806	0.0001	0.0001	0.0001	0.0001	5.72902	2.51829	0.37831	1	up	no
7117	i	chr1	+	251536977	251541560	MSTRG.3060.1	1	4584	MSTRG.3060	SVEP1	2.5356	2.15224	2.86757	2.27792	7.07636	1.53712	0.740846	4.42411	2.80244	1.42568	1.54706	0.629532	0.378321	1	up	no
27099	i	chr14	-	59120482	59146839	MSTRG.11335.1	2	26266	MSTRG.11335	EGLN1	0.453277	2.78203	2.42074	0.714949	2.48781	2.21799	0.101417	0.385404	2.09889	0.762124	1.59164	0.670514	0.378446	1	up	no
89380	u	chrX	.	89432709	89437410	MSTRG.36610.1	1	4702	MSTRG.36610	.	0.519448	0.403926	1.73327	0.674301	0.517259	0.36391	0.123575	0.606469	0.813419	0.324306	1.72435	0.786057	0.378562	1	up	no
11202	i	chr11	+	4624022	4627545	MSTRG.4815.2	2	2470	MSTRG.4815	USP12	0.999331	1.90989	1.43345	2.32023	2.39134	1.06265	0.702424	0.982679	1.743	0.991616	1.65152	0.723792	0.378654	1	up	no
26107	x	chr14	+	45250227	45334837	MSTRG.10963.1	3	1413	MSTRG.10963	TTC28	0.802489	0.679389	0.71073	0.299264	0.106975	0.539389	2.25321	0.358359	1.03804	0.737094	0.527568	-0.922572	0.379509	1	down	no
89545	i	chrX	+	97495374	97495653	MSTRG.36674.1	1	280	MSTRG.36674	LONRF3	2.45652	3.79055	2.33708	2.37658	6.33486	2.72947	0.698789	2.84226	1.76787	1.48848	1.81545	0.86033	0.379518	1	up	no
20477	i	chr13	+	77597112	77598723	MSTRG.8632.2	2	1588	MSTRG.8632	STAG1	1.02935	1.62395	0.0001	0.001367	0.000376	0.0001	0.644093	0.0001	0.001323	0.0001	4.11194	2.03982	0.38001	1	up	no
77029	u	chr7	-	83171515	83176735	MSTRG.31530.1	1	5221	MSTRG.31530	.	2.20595	2.12637	4.64193	4.05375	2.46863	2.09819	0.0001	1.39455	3.36806	1.71439	1.80713	0.853699	0.380129	1	up	no
34249	i	chr16	-	3684432	3687169	MSTRG.14292.1	2	2714	MSTRG.14292	TRIO	1.67389	1.77391	1.84068	0.645878	1.81649	1.39091	0.0001	1.61739	0.521851	0.0001	2.19549	1.13454	0.380143	1	up	no
42061	i	chr2	-	9203773	9211880	MSTRG.17581.46	5	945	MSTRG.17581	ENSSSCG00000036669	0.0001	4.19928	1.20843	1.742	0.0001	0.005874	0.0001	1.84929	0.0001	0.0001	3.85344	1.94615	0.380265	1	up	no
84452	i	chr9	+	50267662	50317532	MSTRG.34607.1	2	18135	MSTRG.34607	GRAMD1B	4.2877	1.51025	0.509618	1.14044	1.16948	0.78344	2.37106	1.16739	0.863873	0.264037	1.58125	0.661063	0.380275	1	up	no
62070	u	chr5	+	49216851	49230525	MSTRG.25384.3	2	12301	MSTRG.25384	.	0.0001	2.81843	0.475236	0.48128	3.08259	3.80308	2.95989	2.96602	3.13074	0.468267	0.514528	-0.958678	0.3803	1	down	no
19474	u	chr13	-	46576092	46578911	MSTRG.8215.1	1	2820	MSTRG.8215	.	0.377251	0.851849	2.89002	1.7614	0.585001	0.73743	0.486901	0.986992	1.09324	0.399783	1.74539	0.803547	0.38065	1	up	no
10889	u	chr10	-	67725150	67735833	MSTRG.4691.1	5	6956	MSTRG.4691	.	0.459575	0.381105	0.235529	0.508867	2.32048	0.279378	0.158708	0.374	0.979131	0.442719	1.74828	0.80594	0.38065	1	up	no
81078	u	chr8	.	102527967	102530216	MSTRG.33250.1	1	2250	MSTRG.33250	.	0.253302	0.301243	1.91823	0.33332	0.459035	0.252965	0.038449	0.142382	0.161756	1.01879	2.02258	1.0162	0.380671	1	up	no
16964	u	chr12	.	56569724	56570772	MSTRG.7132.1	1	1049	MSTRG.7132	.	0.384337	0.564899	1.10936	1.53161	1.92697	0.724316	0.277773	0.804617	0.665474	0.540402	1.83138	0.872927	0.38075	1	up	no
35823	u	chr16	.	68135409	68138066	MSTRG.15026.1	1	2658	MSTRG.15026	.	0.253873	1.60111	0.099316	0.394625	0.885196	1.43128	0.453422	2.04461	0.688545	1.47213	0.531055	-0.913066	0.380861	1	down	no
55188	i	chr4	-	20714293	20758025	MSTRG.22726.1	2	40628	MSTRG.22726	EXT1	4.48977	6.13198	2.38043	7.0673	4.40607	3.0756	1.83501	2.88048	0.0001	5.23011	1.87965	0.910468	0.381024	1	up	no
50373	u	chr3	.	27900503	27904021	MSTRG.20770.1	1	3519	MSTRG.20770	.	0.535906	0.354141	0.263645	1.00842	0.779811	1.04013	0.425774	1.87663	1.22415	0.641865	0.564827	-0.824118	0.381317	1	down	no
71685	i	chr6	+	151136122	151180648	MSTRG.29388.2	2	22579	MSTRG.29388	NFIA	0.270506	0.405998	0.490077	0.556283	0.859791	0.235794	0.53557	1.78475	0.345652	1.16979	0.634316	-0.656726	0.38158	1	down	no
80608	i	chr8	+	78408338	78411109	MSTRG.33047.1	2	1971	MSTRG.33047	LRBA	0.462894	0.724148	0.780806	1.3022	0.832541	1.04605	2.11905	0.625759	1.13236	2.09005	0.584975	-0.773553	0.381683	1	down	no
7091	i	chr1	-	251081909	251095026	MSTRG.3049.2	1	13118	MSTRG.3049	PALM2	2.32826	8.78299	0.556652	2.49722	0.700721	2.8495	12.6938	6.51849	1.35037	1.30906	0.601338	-0.733751	0.381868	1	down	no
6144	i	chr1	-	218398782	218408782	MSTRG.2634.1	1	10001	MSTRG.2634	RFX3	0.926764	1.6048	1.96842	1.53433	1.82124	2.02731	2.04384	2.42588	1.96205	2.99799	0.685652	-0.544452	0.381938	1	down	no
79973	i	chr8	+	56329158	56346803	MSTRG.32805.3	2	6851	MSTRG.32805	IGFBP7	0.0001	0.459187	0.074805	0.0001	0.0001	0.0001	0.0001	1.62177	0.0001	0.932238	0.209173	-2.25723	0.382115	1	down	no
23826	j	chr13	+	197985737	197998280	MSTRG.10027.3	4	642	MSTRG.10027	ENSSSCG00000012046	0.0001	0.0001	0.0001	0.699807	1.62859	1.41113	0.0001	2.25523	2.4556	1.08051	0.323315	-1.62899	0.382139	1	down	no
48397	i	chr2	.	148169832	148171300	MSTRG.19871.1	1	1469	MSTRG.19871	ENSSSCG00000031406	0.178674	0.174861	0.353596	0.278037	0.507359	0.114875	1.68155	0.160171	0.029252	0.989589	0.501616	-0.995346	0.382355	1	down	no
23966	i	chr13	+	202061652	202071278	MSTRG.10063.1	2	1303	MSTRG.10063	ERG	1.67035	1.2195	1.36087	1.99923	2.43546	0.97241	0.890049	1.09931	0.627549	1.46429	1.71866	0.781281	0.382512	1	up	no
68575	i	chr6	+	70374023	70375138	MSTRG.28154.1	2	825	MSTRG.28154	UBE4B	1.15187	1.06444	1.41711	2.15772	2.11896	0.555552	0.609904	0.798187	1.57128	0.890968	1.78723	0.837725	0.38317	1	up	no
11185	i	chr11	.	4167928	4168593	MSTRG.4802.1	1	666	MSTRG.4802	CDK8	1.36584	0.499505	0.509058	0.536579	0.482355	0.613297	1.35076	1.97234	1.26332	1.27779	0.523866	-0.932729	0.383256	1	down	no
9699	i	chr10	-	38532824	38538232	MSTRG.4182.1	1	5409	MSTRG.4182	MOB3B	1.68948	2.49604	6.27901	3.21066	5.67991	1.95389	1.35562	3.61807	4.11331	1.95246	1.48962	0.574943	0.38328	1	up	no
46476	i	chr2	-	85435632	85461091	MSTRG.19036.1	2	20767	MSTRG.19036	IQGAP2	5.89547	2.25105	1.00496	1.32892	1.25474	1.91622	2.2916	1.4703	1.25869	0.977706	1.48274	0.568264	0.383285	1	up	no
2018	i	chr1	-	74707535	74718818	MSTRG.886.4	2	10347	MSTRG.886	FOXO3	0.199564	0.191249	0.365782	2.18762	0.0001	0.320385	0.189441	0.396379	0.280946	0.254762	2.04195	1.02995	0.383395	1	up	no
70488	i	chr6	+	103042812	103054196	MSTRG.28876.1	1	11385	MSTRG.28876	DLGAP1	1.76678	2.71179	2.47566	1.50593	2.11286	1.54291	2.01786	1.89771	2.23639	8.24283	0.663397	-0.592056	0.383709	1	down	no
5598	u	chr1	+	194241401	194249448	MSTRG.2402.1	1	8048	MSTRG.2402	.	0.962554	1.56625	1.00876	1.5267	1.51588	1.90325	1.69981	2.68891	1.95274	1.66921	0.663728	-0.591335	0.383821	1	down	no
3235	i	chr1	.	116176043	116176496	MSTRG.1404.1	1	454	MSTRG.1404	PRTG	3.47528	4.23726	1.43447	0.971884	1.32518	0.942615	1.16909	1.84874	1.04889	1.29343	1.81572	0.860544	0.38389	1	up	no
64051	i	chr5	-	101742562	101753539	MSTRG.26202.9	2	7741	MSTRG.26202	PAWR	0.0001	0.619901	1.37759	0.774211	0.977415	1.7096	1.28582	2.11088	0.809039	1.07119	0.536635	-0.897987	0.38417	1	down	no
49037	u	chr3	+	6924960	6926326	MSTRG.20174.1	1	1367	MSTRG.20174	.	1.26861	1.53951	1.03308	0.581111	3.06622	0.535245	0.0001	1.35568	0.913007	1.0253	1.95557	0.967592	0.384284	1	up	no
21401	u	chr13	.	112254794	112260993	MSTRG.9018.1	1	6200	MSTRG.9018	.	3.35528	0.167781	0.174721	0.284457	0.14791	0.179798	1.13312	0.202401	0.38975	0.233832	1.93096	0.949321	0.384372	1	up	no
69690	u	chr6	+	88108650	88115127	MSTRG.28561.1	2	3187	MSTRG.28561	.	0.20106	0.158406	0.593094	0.560706	0.562413	0.166414	1.06031	0.463901	0.072133	2.07557	0.540777	-0.886894	0.384543	1	down	no
59606	u	chr5	.	3342342	3344455	MSTRG.24455.1	1	2114	MSTRG.24455	.	1.15698	1.63516	1.68365	1.64151	1.19568	1.02625	0.599354	0.939493	1.3684	0.450516	1.6681	0.738209	0.384573	1	up	no
76116	u	chr7	.	66645459	66646062	MSTRG.31232.1	1	604	MSTRG.31232	.	0.434555	0.978073	0.650396	0.643529	0.658862	1.28428	0.541885	1.74302	1.83302	0.971715	0.527997	-0.921397	0.385126	1	down	no
43599	o	chr2	-	49200941	49253610	MSTRG.18110.1	2	1255	MSTRG.18110	ADM	2.14353	1.77496	0.0001	0.057397	0.384049	1.83223	1.13277	2.76325	2.53024	1.41469	0.450734	-1.14965	0.385264	1	down	no
19282	u	chr13	.	41791583	41825080	MSTRG.8091.1	1	33498	MSTRG.8091	.	0.412291	2.3059	0.745766	0.637541	0.488543	0.426939	0.365133	0.801856	0.93997	0.588118	1.47022	0.55603	0.385438	1	up	no
19374	u	chr13	+	43398891	43416426	MSTRG.8172.1	2	16353	MSTRG.8172	.	0.675596	0.546506	0.863468	0.749927	0.421578	0.801441	0.347933	3.13162	0.630863	0.402073	0.612931	-0.706203	0.385461	1	down	no
85208	u	chr9	.	71724653	71724894	MSTRG.34867.1	1	242	MSTRG.34867	.	3.473	1.23532	3.45887	3.55824	2.45191	0.4889	2.15712	0.298468	1.96206	2.33653	1.95737	0.968913	0.385479	1	up	no
34250	i	chr16	-	3684450	3684819	MSTRG.14292.2	1	370	MSTRG.14292	TRIO	1.29275	0.098048	0.346596	2.2317	0.33586	0.221682	3.32819	0.579006	1.61931	3.12412	0.485212	-1.04331	0.385562	1	down	no
40067	i	chr18	-	33511670	33515637	MSTRG.16792.2	2	3623	MSTRG.16792	DOCK4	1.81721	2.11054	0.648561	0.8185	4.59693	3.1454	2.59688	4.23972	3.16688	2.92253	0.62171	-0.685687	0.385619	1	down	no
52249	i	chr3	.	67681645	67685257	MSTRG.21530.1	1	3613	MSTRG.21530	EVA1A	0.861882	0.340387	0.986131	0.782201	0.538695	0.77286	3.57425	0.69175	0.401707	0.519095	0.588841	-0.76405	0.385649	1	down	no
73771	j	chr7	-	23613335	23619987	MSTRG.30296.1	2	3417	MSTRG.30296	ENSSSCG00000001395	0.186822	0.31819	0.438099	0.879328	0.325152	0.314678	0.510094	0.444721	0.224145	2.41319	0.549701	-0.86328	0.385664	1	down	no
9691	i	chr10	-	38477636	38493198	MSTRG.4177.1	2	10151	MSTRG.4177	MOB3B	0.986779	1.38964	2.75213	1.72111	2.56979	1.13217	0.580513	1.31899	2.23421	1.10635	1.4782	0.563842	0.385712	1	up	no
60307	i	chr5	.	14145252	14147200	MSTRG.24749.1	1	1949	MSTRG.24749	NUAK1	2.34836	1.20206	3.42419	2.87049	2.02411	1.36674	1.52797	1.53267	1.05891	1.69975	1.65171	0.723957	0.386152	1	up	no
52181	u	chr3	-	63617483	63633599	MSTRG.21491.1	2	14689	MSTRG.21491	.	0.799395	0.670329	0.440051	0.046557	0.559601	1.39727	0.528291	1.00749	0.627735	0.646118	0.598048	-0.741666	0.386182	1	down	no
71574	i	chr6	+	148363997	148390711	MSTRG.29333.1	2	5442	MSTRG.29333	ROR1	1.84095	1.10918	2.77341	2.09687	2.02854	1.20537	0.832001	1.36227	1.49023	1.57671	1.52305	0.606967	0.386386	1	up	no
75692	i	chr7	.	57157507	57158336	MSTRG.31031.1	1	830	MSTRG.31031	ENSSSCG00000035350	0.662365	0.424051	1.18493	1.10116	1.00738	1.52146	2.1936	0.75827	1.38893	1.94126	0.56127	-0.833234	0.386507	1	down	no
83969	u	chr9	+	40112575	40117142	MSTRG.34424.1	1	4568	MSTRG.34424	.	10.3564	0.418169	1.02199	1.79904	0.749374	1.86462	3.19586	0.995603	0.259175	1.83782	1.75946	0.815132	0.386511	1	up	no
37959	j	chr17	+	46933484	47044047	MSTRG.15972.1	5	1180	MSTRG.15972	PKIG	2.79152	0.0001	0.0001	0.0001	0.0001	0.0001	3.23004	2.55428	0.0001	6.75884	0.222582	-2.16759	0.386573	1	down	no
65699	o	chr6	+	38202994	38549686	MSTRG.27039.6	5	3030	MSTRG.27039	RF00026	0.338299	0.239726	0.033856	0.024228	1.12057	1.34083	0.014533	0.777871	1.39459	0.26091	0.463659	-1.10886	0.386578	1	down	no
8884	i	chr10	+	18750901	18771262	MSTRG.3838.2	2	12419	MSTRG.3838	SMYD3	0.001222	0.0001	0.0001	1.91737	0.898064	0.001121	0.577892	0.204075	0.104057	0.002188	3.16738	1.66329	0.38671	1	up	no
1371	x	chr1	-	39865436	39868377	MSTRG.590.1	1	2942	MSTRG.590	ENSSSCG00000039357	0.324803	0.380019	2.99733	1.64776	0.703284	1.43392	0.235717	1.07419	0.369671	0.258978	1.79488	0.843888	0.386719	1	up	no
7404	i	chr1	.	261124962	261125724	MSTRG.3177.1	1	763	MSTRG.3177	C5	0.859388	1.33887	1.52382	0.982922	1.85863	0.516058	0.403995	1.21015	0.932755	0.582834	1.80033	0.848258	0.386769	1	up	no
31360	i	chr15	.	52719032	52719502	MSTRG.13161.1	1	471	MSTRG.13161	NRG1	1.42379	0.268332	0.309812	0.625692	1.31109	2.64737	1.48064	2.66875	0.254218	0.858128	0.497997	-1.00579	0.386913	1	down	no
24908	u	chr14	.	18044274	18046183	MSTRG.10488.1	1	1910	MSTRG.10488	.	0.919785	0.455554	2.28367	0.791203	0.56936	0.64782	0.921472	0.277015	0.527536	0.418614	1.79755	0.846028	0.386953	1	up	no
2139	x	chr1	+	77400774	77476072	MSTRG.956.2	4	991	MSTRG.956	REV3L	1.48036	0.599771	0.0001	0.2907	1.35203	0.479374	0.05921	0.0001	0.877113	0.0001	2.6294	1.39473	0.387243	1	up	no
84108	i	chr9	+	44332459	44364065	MSTRG.34480.1	2	12188	MSTRG.34480	SIK3	0.142393	0.009834	0.006045	0.01157	2.3965	0.028326	1.85064	0.00043	2.33947	1.81098	0.425606	-1.23241	0.387298	1	down	no
78271	i	chr7	+	121043626	121043847	MSTRG.32076.1	1	222	MSTRG.32076	EVL	1.16274	3.22968	4.39092	4.33306	3.15272	2.02935	0.585226	1.81759	2.92478	1.38991	1.86	0.895299	0.387398	1	up	no
36598	u	chr17	-	15028250	15070375	MSTRG.15372.1	3	4384	MSTRG.15372	.	0.450005	0.19197	0.150277	0.093047	0.137331	0.0001	0.131236	0.041087	0.266359	0.0001	2.33008	1.22038	0.387676	1	up	no
1137	u	chr1	.	31597002	31601835	MSTRG.501.1	1	4834	MSTRG.501	.	0.665394	1.56973	0.608053	0.748347	0.975372	1.61145	1.04414	1.44248	1.31134	2.02611	0.6142	-0.70322	0.387692	1	down	no
38479	j	chr17	-	59175106	59180892	MSTRG.16158.4	3	3314	MSTRG.16158	ENSSSCG00000007525	1.24578	1.4931	0.949726	0.93164	0.855706	1.47449	0.360241	3.21866	1.30406	3.06329	0.581265	-0.782731	0.387927	1	down	no
61463	u	chr5	-	31267970	31277811	MSTRG.25171.4	2	9820	MSTRG.25171	.	0.12346	0.0001	2.88751	0.0001	0.0001	0.0001	0.472412	0.0001	0.0001	0.0001	6.36885	2.67103	0.388005	1	up	no
4640	i	chr1	.	162674746	162675299	MSTRG.1957.1	1	554	MSTRG.1957	NEDD4L	3.01374	1.42445	1.84849	1.55786	2.13829	0.846844	2.02775	0.990052	0.883572	0.758604	1.81281	0.858229	0.388116	1	up	no
58206	i	chr4	+	100777260	100785007	MSTRG.23857.1	1	7748	MSTRG.23857	ENSSSCG00000024481	0.75176	0.956244	0.902545	0.842535	1.4895	1.55611	0.650353	1.88336	1.31171	2.31424	0.640582	-0.642545	0.388184	1	down	no
32659	o	chr15	-	95637020	95643781	MSTRG.13692.1	2	2537	MSTRG.13692	STAT1	1.2421	1.38449	1.82337	6.90591	1.96216	1.33605	2.12699	2.15913	1.03873	1.29517	1.67394	0.743252	0.388309	1	up	no
9880	i	chr10	-	41307817	41322705	MSTRG.4249.1	1	14889	MSTRG.4249	SVIL	2.2448	1.20252	4.82796	3.47004	2.59867	0.399138	1.95459	2.82818	1.85141	2.51672	1.50198	0.586868	0.388484	1	up	no
49588	i	chr3	+	14171119	14210020	MSTRG.20423.1	2	6730	MSTRG.20423	ENSSSCG00000035984	0.471823	0.208622	0.046057	0.063334	0.093626	0.051436	0.06567	0.080315	0.239316	0.039489	1.85513	0.891522	0.388503	1	up	no
6139	i	chr1	-	218342711	218363080	MSTRG.2631.1	1	20370	MSTRG.2631	RFX3	1.05753	2.01573	2.70446	1.77964	2.30254	2.43296	2.60965	2.71103	2.61456	3.67119	0.702304	-0.509833	0.388525	1	down	no
86910	i	chr9	+	130358214	130363396	MSTRG.35573.2	2	3382	MSTRG.35573	RPS6KC1	1.58078	1.7825	2.24254	0.959917	1.75762	1.65098	0.162682	1.39927	0.110621	1.53924	1.71164	0.775378	0.38867	1	up	no
27353	u	chr14	+	63860456	63874263	MSTRG.11439.1	1	13808	MSTRG.11439	.	0.910955	1.51659	1.87039	1.5367	1.5367	1.63598	2.07169	2.09589	1.72735	3.06864	0.695439	-0.524003	0.388753	1	down	no
87072	u	chr9	.	133418907	133422967	MSTRG.35641.1	1	4061	MSTRG.35641	.	0.053707	2.48119	0.248526	0.07735	0.337468	0.174889	0.137197	0.82616	0.203756	0.333151	1.90922	0.932986	0.38913	1	up	no
50056	i	chr3	.	19563528	19564501	MSTRG.20609.1	1	974	MSTRG.20609	IL4R	2.91026	0.445732	1.54411	1.74688	3.1176	0.652298	1.4211	1.11693	0.752827	1.55578	1.77572	0.828408	0.389156	1	up	no
1992	i	chr1	+	74061010	74067839	MSTRG.871.2	2	6062	MSTRG.871	SEC63	0.0001	0.0001	0.616711	1.77988	0.258511	1.59011	1.65529	1.0342	2.69003	0.0001	0.380976	-1.39223	0.389252	1	down	no
54802	o	chr4	+	7803306	7844403	MSTRG.22548.2	2	2342	MSTRG.22548	ST3GAL1	0.0001	1.24515	0.504606	1.56572	0.0001	0.0001	0.0001	0.794404	0.0001	0.0001	4.1717	2.06063	0.389636	1	up	no
61470	u	chr5	+	31334312	31341593	MSTRG.25176.1	2	7250	MSTRG.25176	.	4.84376	6.70462	3.83452	3.8444	5.97169	4.10328	2.45492	3.46045	4.48783	3.44388	1.40381	0.489353	0.389637	1	up	no
11602	i	chr11	+	14402831	14417323	MSTRG.5035.1	2	14212	MSTRG.5035	LHFPL6	1.72615	1.38127	2.44443	2.57902	2.79736	1.70197	1.21975	2.09332	1.29315	1.38067	1.42131	0.507216	0.389659	1	up	no
73877	j	chr7	+	23874233	23874902	MSTRG.30324.2	3	499	MSTRG.30324	SAPCD1	1.46538	0.77161	0.576595	0.723531	0.586157	1.09688	1.17043	2.01157	1.36531	2.15738	0.528519	-0.919972	0.389661	1	down	no
29277	i	chr14	-	113745583	113751867	MSTRG.12278.2	2	4200	MSTRG.12278	WBP1L	0.0001	1.33092	6.95221	0.005576	0.0001	0.0001	0.0001	1.73842	0.0001	0.0001	4.76697	2.25307	0.389669	1	up	no
48690	i	chr3	.	1481124	1481646	MSTRG.20016.1	1	523	MSTRG.20016	MAD1L1	2.88687	3.04157	2.25471	1.47828	1.92893	1.17753	0.75778	2.196	1.21372	1.28008	1.74946	0.80691	0.389672	1	up	no
11099	i	chr11	-	1360830	1364187	MSTRG.4766.1	2	2842	MSTRG.4766	ZDHHC20	1.59307	2.07915	2.10065	1.78158	2.29048	1.15777	0.365557	1.84656	1.79763	0.991622	1.59842	0.676651	0.389783	1	up	no
21404	u	chr13	.	112296604	112299965	MSTRG.9021.1	1	3362	MSTRG.9021	.	3.22694	0.196635	0.112185	0.203221	0.168725	0.161464	1.09006	0.180445	0.31794	0.195656	2.00852	1.00613	0.389928	1	up	no
58292	u	chr4	.	103497051	103499281	MSTRG.23902.1	1	2231	MSTRG.23902	.	1.71924	0.537759	0.589048	1.10919	0.691109	0.626878	0.242105	0.774423	0.595849	0.518255	1.68498	0.75273	0.389941	1	up	no
65773	i	chr6	-	40424503	40425920	MSTRG.27062.1	1	1418	MSTRG.27062	ZNF536	0.649599	2.41531	0.48457	0.706801	1.38092	0.884771	0.537289	0.919954	0.576202	0.28375	1.76054	0.816021	0.390001	1	up	no
70154	i	chr6	-	95272445	95274341	MSTRG.28793.2	2	1603	MSTRG.28793	MACF1	0.0001	0.003318	1.82734	2.59649	0.014062	3.6867	1.38822	0.029749	4.11321	1.81195	0.402664	-1.31235	0.390344	1	down	no
64891	u	chr6	+	17305454	17313410	MSTRG.26674.2	1	7957	MSTRG.26674	.	0.160938	0.0001	0.024596	15.1504	0.073787	18.2397	0.225673	18.5666	0.398364	2.29588	0.387902	-1.36624	0.390692	1	down	no
2560	i	chr1	+	97766005	97767958	MSTRG.1127.1	1	1954	MSTRG.1127	ZBTB7C	15.7491	0.282741	0.556078	1.57642	0.866512	0.328385	6.84744	0.696834	0.275241	0.982424	2.08435	1.0596	0.390869	1	up	no
43127	j	chr2	+	30605564	30619554	MSTRG.17900.1	3	3825	MSTRG.17900	KCNA4	1.53022	1.00238	0.061731	0.340265	0.552532	1.57155	0.910331	2.19368	1.22691	0.512757	0.54357	-0.879463	0.390894	1	down	no
20820	i	chr13	-	89775512	89796468	MSTRG.8765.1	2	10125	MSTRG.8765	WWTR1	0.585568	0.571844	3.43222	2.92701	2.61646	2.2875	0.520686	0.769514	2.27706	0.632519	1.562	0.643392	0.390972	1	up	no
57594	i	chr4	.	95349966	95350733	MSTRG.23647.1	1	768	MSTRG.23647	IL6R	1.9328	0.585069	2.87792	3.15436	0.921046	0.742667	1.45479	0.480819	1.31456	1.12883	1.84924	0.886933	0.391143	1	up	no
22003	i	chr13	+	129595630	129610533	MSTRG.9289.1	1	14904	MSTRG.9289	FGF12	1.61696	0.0001	3.18678	1.63067	4.51411	0.0001	0.0001	3.0114	0.0001	0.0001	3.63524	1.86205	0.39117	1	up	no
21032	i	chr13	.	96140598	96141384	MSTRG.8873.1	1	787	MSTRG.8873	KCNAB1	1.52405	0.599317	1.33884	1.11633	1.84378	0.570492	0.625013	0.703594	0.328769	1.29694	1.82203	0.865549	0.391216	1	up	no
44954	u	chr2	+	69317995	69320241	MSTRG.18487.1	1	2247	MSTRG.18487	.	3.01248	0.156839	0.10919	0.446763	0.152639	0.134831	1.25987	0.125858	0.249491	0.055928	2.12375	1.08661	0.391403	1	up	no
18353	o	chr13	-	30286592	30347675	MSTRG.7777.1	2	3345	MSTRG.7777	SCAP	8.76533	1.59197	0.927662	1.59896	1.46496	1.49389	3.57082	1.21256	1.39805	0.950854	1.66341	0.734147	0.391439	1	up	no
77037	u	chr7	.	83230805	83236168	MSTRG.31538.1	1	5364	MSTRG.31538	.	0.699769	0.571001	1.69274	1.76929	0.996178	0.483533	0.861089	0.336721	1.26598	0.507163	1.65842	0.729805	0.391443	1	up	no
83962	u	chr9	-	40084455	40091728	MSTRG.34420.1	2	3013	MSTRG.34420	.	6.8872	0.567861	0.51199	1.3328	0.246252	1.08394	2.0845	0.691029	0.300816	1.08729	1.81914	0.863258	0.391461	1	up	no
61506	i	chr5	-	32910424	32950300	MSTRG.25145.1	2	37994	MSTRG.25145	RAP1B	0.0001	4.27905	0.0001	1.66404	5.3e-05	4.55382	0.232635	3.81644	3.95575	4.04969	0.357853	-1.48256	0.391518	1	down	no
36855	i	chr17	-	27946898	27959903	MSTRG.15496.1	1	13006	MSTRG.15496	RIN2	2.14835	1.58051	2.94548	1.96054	1.7156	1.35189	1.23876	1.88055	1.56171	1.2819	1.415	0.500806	0.391728	1	up	no
14718	u	chr12	-	23911534	23915345	MSTRG.6203.2	2	3772	MSTRG.6203	.	0.54091	1.77542	1.55631	1.49682	0.596374	1.25189	1.53434	2.49746	2.55872	1.87999	0.613618	-0.704586	0.391768	1	down	no
19434	u	chr13	.	45891656	45892776	MSTRG.8198.1	1	1121	MSTRG.8198	.	0.686923	0.570081	0.466161	0.424032	0.782616	0.828788	1.41848	1.41519	0.797342	0.809515	0.556014	-0.846806	0.391919	1	down	no
516	i	chr1	.	12337358	12337757	MSTRG.236.1	1	400	MSTRG.236	CNKSR3	1.9251	2.28122	3.4652	3.44674	2.41058	1.49303	1.60682	2.29308	1.37208	0.839698	1.77901	0.831073	0.39206	1	up	no
71424	o	chr6	-	145600361	145635394	MSTRG.29272.1	3	2543	MSTRG.29272	MIER1	2.46753	0.649041	0.782775	0.647085	0.637936	0.612944	0.458008	0.901767	0.636549	0.479852	1.67827	0.746973	0.392125	1	up	no
66120	u	chr6	.	45852908	45856308	MSTRG.27213.1	1	3401	MSTRG.27213	.	1.32479	1.09884	1.60358	1.762	1.59037	0.777802	1.15919	0.926804	0.818469	0.861921	1.62396	0.699516	0.392183	1	up	no
32393	i	chr15	-	83910222	83913865	MSTRG.13596.2	2	2733	MSTRG.13596	OSBPL6	0.353128	0.315812	0.577912	0.27252	0.0001	0.620451	0.946106	0.371052	0.492838	0.556038	0.508783	-0.974878	0.392232	1	down	no
13656	i	chr12	+	13590909	13596614	MSTRG.5862.1	1	5706	MSTRG.5862	HELZ	0.0001	0.0001	0.427	0.284698	0.018546	0.0001	0.152124	0.0001	0.0001	0.0001	4.78904	2.25974	0.392395	1	up	no
6009	i	chr1	.	209650106	209651687	MSTRG.2563.1	1	1582	MSTRG.2563	LURAP1L	0.741992	0.523119	0.913031	1.27211	1.04854	1.77631	1.78294	1.28093	1.02723	1.74619	0.590889	-0.759042	0.392624	1	down	no
78906	i	chr8	-	12395419	12525618	MSTRG.32341.1	6	4249	MSTRG.32341	QDPR	0.444467	0.770604	0.465952	1.77223	0.791742	1.64532	0.563683	2.28346	1.3997	1.25435	0.593996	-0.751475	0.392656	1	down	no
66910	i	chr6	-	52783788	52799173	MSTRG.27535.2	2	13592	MSTRG.27535	ARHGAP35	0.287754	2.96794	0.366826	0.54852	0.357614	1.83139	2.13434	0.379528	2.9353	0.38394	0.590861	-0.759109	0.392667	1	down	no
21242	u	chr13	.	107946083	107953155	MSTRG.8952.1	1	7073	MSTRG.8952	.	0.586988	0.890057	1.22615	1.18698	0.964575	0.808626	2.93101	1.14384	0.407911	2.25651	0.643194	-0.636674	0.392773	1	down	no
12447	i	chr11	-	63332853	63337895	MSTRG.5378.1	1	5043	MSTRG.5378	ENSSSCG00000009489	3.03913	0.945283	1.38728	1.46469	2.21291	1.41759	0.584858	0.938266	1.50455	1.44095	1.53737	0.620465	0.392789	1	up	no
12442	x	chr11	-	63154697	63296607	MSTRG.5374.1	2	7202	MSTRG.5374	ENSSSCG00000009489	3.58	1.23317	2.01491	1.49106	2.69867	1.52667	1.00774	1.31742	1.90935	1.73652	1.46949	0.555316	0.392861	1	up	no
39592	u	chr18	+	17869029	17925593	MSTRG.16591.12	4	18165	MSTRG.16591	.	0.065027	0.0001	0.0001	0.0001	0.0001	0.02456	0.0001	0.361959	0.0001	0.0001	0.169141	-2.5637	0.393035	1	down	no
28207	u	chr14	.	88176429	88176997	MSTRG.11806.1	1	569	MSTRG.11806	.	0.344601	0.325166	1.39396	1.14454	0.985245	2.96214	1.53904	1.37102	0.682095	1.27609	0.535545	-0.90092	0.393101	1	down	no
17150	j	chr12	-	59979735	59999846	MSTRG.7217.5	2	19218	MSTRG.7217	ENSSSCG00000018046	2.10268	0.153149	1.50715	0.389898	1.39858	1.09727	0.056135	0.948785	0.852029	0.0001	1.8791	0.910042	0.393257	1	up	no
72353	i	chr6	-	166496636	166501109	MSTRG.29694.1	2	3908	MSTRG.29694	PTCH2	1.13496	3.92882	0.0001	1.70057	0.052667	1.8868	0.594848	0.268064	0.055701	0.0001	2.4299	1.28089	0.39329	1	up	no
28569	i	chr14	-	101468695	101471161	MSTRG.11969.1	2	1544	MSTRG.11969	PANK1	0.477498	0.981953	0.334196	0.551224	0.623653	0.669004	0.841765	1.89555	0.947515	0.938076	0.560955	-0.834042	0.393483	1	down	no
35013	i	chr16	.	38073703	38074441	MSTRG.14635.1	1	739	MSTRG.14635	PDE4D	1.42614	1.26477	1.85983	1.8855	1.63109	2.10351	1.78278	1.8652	1.13273	7.27003	0.569958	-0.811071	0.394112	1	down	no
64684	i	chr6	+	12632209	12648390	MSTRG.26590.3	2	3959	MSTRG.26590	ZNRF1	0.471834	0.0001	0.0001	0.160046	0.186993	0.101271	0.142822	0.164398	1.54408	0.137433	0.391901	-1.35144	0.394137	1	down	no
12444	u	chr11	+	63258331	63275175	MSTRG.5376.1	2	14806	MSTRG.5376	.	3.09738	1.01044	1.60593	1.4014	2.52291	1.41449	0.90545	1.0188	1.74036	1.67705	1.42656	0.512543	0.394341	1	up	no
35779	u	chr16	.	67351724	67363448	MSTRG.15041.1	1	11725	MSTRG.15041	.	0.636191	1.98248	3.10379	1.39991	1.10156	0.765889	0.449044	1.42705	1.59036	1.29731	1.48724	0.572638	0.394374	1	up	no
22649	x	chr13	+	142681226	142776612	MSTRG.9549.3	2	2747	MSTRG.9549	ENSSSCG00000036627	2.38586	0.319182	0.071503	0.285768	0.153192	0.210621	1.02349	0.077368	0.093094	0.155809	2.06071	1.04314	0.39439	1	up	no
56201	x	chr4	+	65590367	65604837	MSTRG.23159.1	2	564	MSTRG.23159	SULF1	1.75983	1.83735	2.87424	2.29855	2.56531	1.78764	1.07341	1.20473	1.52975	0.899454	1.74523	0.803419	0.394554	1	up	no
73006	o	chr7	+	11342265	11406550	MSTRG.29974.1	2	15313	MSTRG.29974	JARID2	0.343353	0.0001	0.0001	0.0001	0.0001	0.0001	0.088917	1.98948	0.0001	0.0001	0.16537	-2.59623	0.394769	1	down	no
26546	i	chr14	+	49435836	49448418	MSTRG.11109.2	2	11077	MSTRG.11109	ENSSSCG00000010053	0.430749	0.645212	0.872369	1.68566	0.363477	0.169213	1.2454	1.96215	2.29922	0.827294	0.614686	-0.702079	0.395051	1	down	no
51766	i	chr3	+	53336285	53344692	MSTRG.21325.2	2	2816	MSTRG.21325	NPAS2	0.0001	0.0001	0.19735	0.0001	0.469961	0.201186	0.0001	0.715321	0.0001	1.46312	0.280529	-1.83378	0.39516	1	down	no
21240	i	chr13	.	107927519	107930850	MSTRG.8950.1	1	3332	MSTRG.8950	MECOM	0.515469	0.695742	0.743035	0.864818	0.958097	0.898741	2.2587	0.660966	0.191334	2.3594	0.593041	-0.753797	0.395221	1	down	no
62034	i	chr5	-	48560592	48564029	MSTRG.25378.1	1	3438	MSTRG.25378	CASC1	2.21389	2.61408	1.73295	1.80242	1.54741	2.14329	4.1096	2.91546	3.61516	2.46664	0.649878	-0.621758	0.395277	1	down	no
27110	i	chr14	-	59255195	59256162	MSTRG.11341.1	1	968	MSTRG.11341	C1orf131	0.709601	1.08232	0.598125	0.427501	0.64866	1.40435	1.49782	1.67063	0.467766	1.23223	0.552577	-0.855753	0.395603	1	down	no
62163	i	chr5	-	52688611	52697401	MSTRG.25426.1	2	7279	MSTRG.25426	PDE3A	2.80792	1.79168	5.25464	3.13742	4.01451	2.12503	1.84687	2.02889	2.53049	3.28029	1.43979	0.525858	0.395655	1	up	no
22657	u	chr13	.	142899864	142900661	MSTRG.9522.1	1	798	MSTRG.9522	.	2.55101	0.154189	0.430745	0.451502	0.224349	0.084844	1.25902	0.030207	0.162119	0.160905	2.24608	1.16741	0.395764	1	up	no
54351	x	chr3	+	128751719	128826369	MSTRG.22396.1	2	4085	MSTRG.22396	RNF144A	0.586875	0.448322	0.38732	0.308419	0.15805	0.167277	0.2296	0.276895	0.194669	0.230694	1.71861	0.781243	0.396058	1	up	no
54052	u	chr3	.	115748839	115749415	MSTRG.22280.1	1	577	MSTRG.22280	.	0.833696	0.95855	1.48207	0.59078	1.87487	0.375431	0.433009	0.983585	0.350101	0.956423	1.85247	0.889451	0.396106	1	up	no
73486	x	chr7	-	21967657	21981185	MSTRG.30244.1	2	5446	MSTRG.30244	ZKSCAN8	0.107054	2.08446	1.05081	0.29209	0.208233	0.53455	1.86605	2.05607	2.42523	0.070787	0.538302	-0.893513	0.39621	1	down	no
15150	i	chr12	-	33576812	33589884	MSTRG.6394.1	2	10976	MSTRG.6394	MSI2	4.64172	9.49758	3.40131	4.20664	5.21013	3.88295	2.13695	4.17959	5.63564	3.49436	1.39463	0.479877	0.39629	1	up	no
27349	o	chr14	+	63781170	63851806	MSTRG.11436.1	2	15921	MSTRG.11436	ENSSSCG00000035056	0.871791	1.30844	1.91528	1.66369	1.40172	1.62059	1.87115	1.70978	1.99897	3.02888	0.700034	-0.514503	0.396299	1	down	no
40321	u	chr18	.	43704343	43706135	MSTRG.16933.1	1	1793	MSTRG.16933	.	1.1358	0.549668	0.602417	1.01247	0.537143	1.20301	1.68852	1.68511	0.599315	1.42176	0.58164	-0.781803	0.396388	1	down	no
51923	i	chr3	.	56763485	56769395	MSTRG.21388.1	1	5911	MSTRG.21388	ANKRD39	2.1781	1.85742	1.63172	1.51234	1.43735	1.40024	2.32295	1.51832	3.72838	4.1211	0.658233	-0.60333	0.396439	1	down	no
31359	i	chr15	.	52711190	52712963	MSTRG.13160.1	1	1774	MSTRG.13160	NRG1	0.274136	0.619006	0.308213	0.340891	1.20883	1.02517	0.681303	2.10224	0.654007	0.472609	0.557426	-0.843148	0.396583	1	down	no
31210	u	chr15	.	47732602	47738896	MSTRG.13105.1	1	6295	MSTRG.13105	.	0.413773	0.309938	0.510221	0.23703	0.564241	0.321659	0.399452	0.346581	0.44902	1.96734	0.584148	-0.775595	0.396681	1	down	no
38742	i	chr18	-	1486874	1488645	MSTRG.16244.1	2	1085	MSTRG.16244	DNAJB6	0.00143	0.045897	4.18331	0.040706	3.33899	0.0001	2.2923	0.110965	0.037649	0.093736	3.00241	1.58612	0.396989	1	up	no
12120	u	chr11	-	25954184	25957530	MSTRG.5235.1	1	3347	MSTRG.5235	.	1.63449	2.84275	3.70383	3.06856	3.50585	3.58922	3.74742	4.30484	5.34916	5.03535	0.669913	-0.577955	0.397169	1	down	no
10414	i	chr10	-	53171444	53187769	MSTRG.4521.1	2	13057	MSTRG.4521	MLLT10	3.17868	2.3919	2.77938	2.08925	0.758623	1.80374	1.58667	1.6287	1.72954	1.1045	1.4259	0.511875	0.397574	1	up	no
59363	i	chr4	.	129722929	129723832	MSTRG.24356.1	1	904	MSTRG.24356	ODF2L	0.871205	0.565776	0.948281	0.305238	0.676824	1.77518	0.721694	0.943145	1.36935	1.31544	0.549784	-0.863062	0.397595	1	down	no
68296	i	chr6	+	63934060	63951915	MSTRG.28030.2	1	17856	MSTRG.28030	GNB1	5.89557	7.64371	1.81961	6.1331	1.76049	7.36655	6.93767	6.28115	6.71151	6.92992	0.679365	-0.557742	0.397733	1	down	no
34667	u	chr16	.	26156976	26157701	MSTRG.14469.1	1	726	MSTRG.14469	.	1.12904	0.902429	0.840193	0.816343	1.81687	1.35319	0.300478	0.373657	0.680138	0.333446	1.81027	0.856208	0.397768	1	up	no
83640	i	chr9	+	32834523	32840193	MSTRG.34295.1	2	5650	MSTRG.34295	YAP1	0.72683	1.70609	1.30714	2.56694	1.93386	0.306178	0.804625	2.15379	1.29487	0.648647	1.58231	0.662034	0.397898	1	up	no
50353	u	chr3	-	26826380	26830771	MSTRG.20750.1	1	4392	MSTRG.20750	.	0.620429	0.829144	2.54962	1.17428	1.1606	0.390452	0.298833	0.491023	1.69181	0.955854	1.65468	0.726553	0.398048	1	up	no
72675	i	chr7	+	838849	840587	MSTRG.29813.1	1	1739	MSTRG.29813	GMDS	0.74146	1.81648	3.30148	2.23074	2.48171	2.00774	0.779693	1.63398	0.794413	1.11689	1.66941	0.739334	0.398144	1	up	no
5523	i	chr1	.	190275184	190307196	MSTRG.2368.1	1	32013	MSTRG.2368	ENSSSCG00000005095	0.742001	0.9175	2.56936	1.23206	1.76333	0.762981	1.30778	1.17656	0.496341	1.17674	1.46823	0.554073	0.398261	1	up	no
70690	i	chr6	.	108117469	108122397	MSTRG.28965.1	1	4929	MSTRG.28965	CABLES1	0.584527	0.991061	1.83913	1.45315	0.938576	2.66915	0.310386	3.99661	0.998993	1.67858	0.601472	-0.733431	0.398334	1	down	no
89374	u	chrX	.	89241778	89243029	MSTRG.36604.1	1	1252	MSTRG.36604	.	1.41421	1.22809	2.26745	1.49037	0.963016	0.994706	0.53045	1.24158	1.26758	0.337494	1.68424	0.752094	0.398697	1	up	no
32316	u	chr15	-	81935582	81948366	MSTRG.13562.1	2	11107	MSTRG.13562	.	0.264957	0.341003	0.616375	0.596587	1.14256	0.248164	1.26574	1.99251	0.771387	0.463201	0.624653	-0.678874	0.398786	1	down	no
19715	u	chr13	.	54837462	54847388	MSTRG.8293.1	1	9927	MSTRG.8293	.	2.33364	2.95585	7.46657	1.44109	3.34723	3.07778	2.06841	0.627849	3.41161	2.592	1.48963	0.574957	0.398788	1	up	no
9403	i	chr10	-	27942412	27945423	MSTRG.4037.1	2	2752	MSTRG.4037	DAPK1	3.88882	4.44308	8.29194	6.21373	7.86082	4.69606	0.728935	5.46278	5.07416	4.66868	1.488	0.573376	0.398947	1	up	no
43154	x	chr2	-	32870742	32945076	MSTRG.17916.1	4	34547	MSTRG.17916	LGR4	2.75529	5.1001	2.86354	2.83743	2.44061	4.17093	5.40967	5.11895	5.09852	2.88295	0.705302	-0.503688	0.399063	1	down	no
60312	u	chr5	+	14187324	14194392	MSTRG.24751.2	2	4635	MSTRG.24751	.	2.29953	0.0001	0.451708	0.627045	1.84965	0.0001	0.0001	1.06562	0.753345	0.0001	2.87371	1.52291	0.399126	1	up	no
[truncated: 19,302 more rows]
