# Supplementary material for: Mechanisms of Oogenesis-Related Long Non-coding RNAs in Porcine Ovaries Treated With Recombinant Pig Follicle-Stimulating Hormone
Source: Front Vet Sci. 2022 Feb 24;8:838703. doi: 10.3389/fvets.2021.838703 (PMC8908959; doi:10.3389/fvets.2021.838703)
Supplement: Supplementary file 6 [file Table_6.XLSX]

## Sheet: Sheet1
Supplymentary Table-S6 GO terms analysis of differentially mRNAs expression.
GO_ID	GO_Term	GO_function	GO_class	S gene number	TS gene number	B gene number	TB gene number	pvalue
GO:0003341	cilium movement	biological_process	6	16	519	24	18011	1.07026e-19
GO:0030286	dynein complex	cellular_component	5	13	519	24	18011	1.52131e-14
GO:0005930	axoneme	cellular_component	6	18	519	64	18011	1.47993e-13
GO:0036126	sperm flagellum	cellular_component	5	13	519	37	18011	1.54021e-11
GO:0045503	dynein light chain binding	molecular_function	5	9	519	15	18011	5.48761e-11
GO:0007018	microtubule-based movement	biological_process	5	16	519	76	18011	3.94858e-10
GO:0005858	axonemal dynein complex	cellular_component	6	6	519	7	18011	3.80104e-09
GO:0030317	flagellated sperm motility	biological_process	5	12	519	49	18011	1.00943e-08
GO:0060294	cilium movement involved in cell motility	biological_process	7	7	519	13	18011	2.33982e-08
GO:0036158	outer dynein arm assembly	biological_process	9	7	519	14	18011	4.56345e-08
GO:0003777	microtubule motor activity	molecular_function	10	13	519	70	18011	8.60139e-08
GO:0008569	ATP-dependent microtubule motor activity, minus-end-directed	molecular_function	12	6	519	10	18011	1.05887e-07
GO:0036159	inner dynein arm assembly	biological_process	9	6	519	11	18011	2.27272e-07
GO:0045505	dynein intermediate chain binding	molecular_function	5	7	519	17	18011	2.39821e-07
GO:0045071	negative regulation of viral genome replication	biological_process	10	8	519	26	18011	4.45292e-07
GO:0003356	regulation of cilium beat frequency	biological_process	9	4	519	4	18011	6.81759e-07
GO:0035082	axoneme assembly	biological_process	9	6	519	13	18011	8.03532e-07
GO:0051959	dynein light intermediate chain binding	molecular_function	5	7	519	21	18011	1.29697e-06
GO:0005929	cilium	cellular_component	4	17	519	150	18011	1.57572e-06
GO:0031514	motile cilium	cellular_component	5	10	519	60	18011	7.48025e-06
GO:0060271	cilium assembly	biological_process	7	16	519	152	18011	8.32839e-06
GO:0051607	defense response to virus	biological_process	5	14	519	125	18011	1.49604e-05
GO:0003351	epithelial cilium movement	biological_process	7	5	519	13	18011	2.07072e-05
GO:0060672	epithelial cell morphogenesis involved in placental branching	biological_process	5	3	519	3	18011	2.37929e-05
GO:0005515	protein binding	molecular_function	4	120	519	2953	18011	3.64529e-05
GO:0070286	axonemal dynein complex assembly	biological_process	8	4	519	9	18011	7.65307e-05
GO:0060287	epithelial cilium movement involved in determination of left/right asymmetry	biological_process	8	3	519	4	18011	9.31261e-05
GO:0036157	outer dynein arm	cellular_component	7	3	519	4	18011	9.31261e-05
GO:0044458	motile cilium assembly	biological_process	8	5	519	18	18011	0.000122319
GO:0005903	brush border	cellular_component	5	7	519	41	18011	0.000152182
GO:0097225	sperm midpiece	cellular_component	5	5	519	19	18011	0.00016209
GO:0060337	type I interferon signaling pathway	biological_process	7	4	519	11	18011	0.000191417
GO:0035455	response to interferon-alpha	biological_process	7	3	519	5	18011	0.000227819
GO:0008574	ATP-dependent microtubule motor activity, plus-end-directed	molecular_function	12	5	519	22	18011	0.00034176
GO:0019731	antibacterial humoral response	biological_process	7	3	519	6	18011	0.000445874
GO:0097729	9+2 motile cilium	cellular_component	6	3	519	6	18011	0.000445874
GO:0032020	ISG15-protein conjugation	biological_process	9	3	519	6	18011	0.000445874
GO:0005524	ATP binding	molecular_function	5	57	519	1264	18011	0.000507571
GO:0005509	calcium ion binding	molecular_function	7	32	519	600	18011	0.000648752
GO:1902093	positive regulation of flagellated sperm motility	biological_process	8	3	519	7	18011	0.000763583
GO:0002177	manchette	cellular_component	6	3	519	7	18011	0.000763583
GO:0060072	large conductance calcium-activated potassium channel activity	molecular_function	10	2	519	2	18011	0.000828792
GO:0035926	chemokine (C-C motif) ligand 2 secretion	biological_process	13	2	519	2	18011	0.000828792
GO:1990716	axonemal central apparatus	cellular_component	7	2	519	2	18011	0.000828792
GO:0036156	inner dynein arm	cellular_component	7	2	519	2	18011	0.000828792
GO:0009615	response to virus	biological_process	7	7	519	57	18011	0.00120391
GO:0030054	cell junction	cellular_component	3	15	519	215	18011	0.00147518
GO:0060285	cilium-dependent cell motility	biological_process	7	3	519	9	18011	0.00175518
GO:0005923	bicellular tight junction	cellular_component	6	8	519	78	18011	0.00180203
GO:0031225	anchored component of membrane	cellular_component	5	4	519	20	18011	0.00228694
GO:0016328	lateral plasma membrane	cellular_component	5	5	519	33	18011	0.00237308
GO:0098641	cadherin binding involved in cell-cell adhesion	molecular_function	7	2	519	3	18011	0.00243879
GO:0070472	regulation of uterine smooth muscle contraction	biological_process	10	2	519	3	18011	0.00243879
GO:1904970	brush border assembly	biological_process	6	2	519	3	18011	0.00243879
GO:1904158	axonemal central apparatus assembly	biological_process	6	2	519	3	18011	0.00243879
GO:0004995	tachykinin receptor activity	molecular_function	8	2	519	3	18011	0.00243879
GO:0035469	determination of pancreatic left/right asymmetry	biological_process	8	2	519	3	18011	0.00243879
GO:1905312	positive regulation of cardiac neural crest cell migration involved in outflow tract morphogenesis	biological_process	9	2	519	3	18011	0.00243879
GO:0008239	dipeptidyl-peptidase activity	molecular_function	9	3	519	10	18011	0.00245398
GO:0016805	dipeptidase activity	molecular_function	8	3	519	10	18011	0.00245398
GO:0045504	dynein heavy chain binding	molecular_function	5	3	519	10	18011	0.00245398
GO:0007605	sensory perception of sound	biological_process	8	9	519	101	18011	0.00255265
GO:0016324	apical plasma membrane	cellular_component	5	12	519	164	18011	0.00288291
GO:0030855	epithelial cell differentiation	biological_process	6	6	519	50	18011	0.00301624
GO:0004867	serine-type endopeptidase inhibitor activity	molecular_function	8	7	519	70	18011	0.00396417
GO:0016327	apicolateral plasma membrane	cellular_component	5	3	519	12	18011	0.00430971
GO:2000146	negative regulation of cell motility	biological_process	7	3	519	12	18011	0.00430971
GO:0003774	motor activity	molecular_function	9	8	519	91	18011	0.00472561
GO:0061827	sperm head	cellular_component	5	2	519	4	18011	0.00478445
GO:0003374	dynamin family protein polymerization involved in mitochondrial fission	biological_process	10	2	519	4	18011	0.00478445
GO:0003996	acyl-CoA ligase activity	molecular_function	7	2	519	4	18011	0.00478445
GO:0004321	fatty-acyl-CoA synthase activity	molecular_function	8	2	519	4	18011	0.00478445
GO:0042296	ISG15 transferase activity	molecular_function	6	2	519	4	18011	0.00478445
GO:0071910	determination of liver left/right asymmetry	biological_process	8	2	519	4	18011	0.00478445
GO:0004127	cytidylate kinase activity	molecular_function	8	2	519	4	18011	0.00478445
GO:0015645	fatty acid ligase activity	molecular_function	7	2	519	4	18011	0.00478445
GO:0030534	adult behavior	biological_process	4	4	519	25	18011	0.00532945
GO:0006637	acyl-CoA metabolic process	biological_process	7	3	519	13	18011	0.00548379
GO:0072687	meiotic spindle	cellular_component	7	3	519	13	18011	0.00548379
GO:0007368	determination of left/right symmetry	biological_process	7	6	519	57	18011	0.00581887
GO:0009617	response to bacterium	biological_process	7	8	519	98	18011	0.00735612
GO:0035456	response to interferon-beta	biological_process	7	2	519	5	18011	0.00782221
GO:0030898	actin-dependent ATPase activity	molecular_function	11	2	519	5	18011	0.00782221
GO:0060056	mammary gland involution	biological_process	5	2	519	5	18011	0.00782221
GO:0071907	determination of digestive tract left/right asymmetry	biological_process	8	2	519	5	18011	0.00782221
GO:0043426	MRF binding	molecular_function	8	2	519	5	18011	0.00782221
GO:0019205	nucleobase-containing compound kinase activity	molecular_function	7	3	519	15	18011	0.00835888
GO:0006898	receptor-mediated endocytosis	biological_process	8	7	519	82	18011	0.00937472
GO:0016887	ATPase activity	molecular_function	9	12	519	191	18011	0.00954115
GO:0070830	bicellular tight junction assembly	biological_process	9	3	519	16	18011	0.0100706
GO:0016459	myosin complex	cellular_component	4	5	519	46	18011	0.0100996
GO:0060770	negative regulation of epithelial cell proliferation involved in prostate gland development	biological_process	9	2	519	6	18011	0.0115104
GO:0005000	vasopressin receptor activity	molecular_function	7	2	519	6	18011	0.0115104
GO:0019941	modification-dependent protein catabolic process	biological_process	9	2	519	6	18011	0.0115104
GO:0034987	immunoglobulin receptor binding	molecular_function	6	2	519	6	18011	0.0115104
GO:0060972	left/right pattern formation	biological_process	6	2	519	6	18011	0.0115104
GO:0010951	negative regulation of endopeptidase activity	biological_process	11	8	519	106	18011	0.0115689
GO:0044782	cilium organization	biological_process	6	3	519	17	18011	0.0119708
GO:0006165	nucleoside diphosphate phosphorylation	biological_process	9	3	519	17	18011	0.0119708
GO:0004550	nucleoside diphosphate kinase activity	molecular_function	7	3	519	17	18011	0.0119708
GO:0004806	triglyceride lipase activity	molecular_function	7	3	519	17	18011	0.0119708
GO:0006813	potassium ion transport	biological_process	9	8	519	107	18011	0.0121992
GO:0005242	inward rectifier potassium channel activity	molecular_function	10	3	519	18	18011	0.0140626
GO:0004252	serine-type endopeptidase activity	molecular_function	8	10	519	156	18011	0.0150752
GO:0005576	extracellular region	cellular_component	3	31	519	713	18011	0.0153272
GO:0005215	transporter activity	molecular_function	3	6	519	70	18011	0.0154018
GO:0001669	acrosomal vesicle	cellular_component	9	5	519	51	18011	0.0154033
GO:1904754	positive regulation of vascular associated smooth muscle cell migration	biological_process	10	2	519	7	18011	0.0158091
GO:0042048	olfactory behavior	biological_process	5	2	519	7	18011	0.0158091
GO:0043278	response to morphine	biological_process	6	2	519	7	18011	0.0158091
GO:0015271	outward rectifier potassium channel activity	molecular_function	10	2	519	7	18011	0.0158091
GO:0050891	multicellular organismal water homeostasis	biological_process	8	2	519	7	18011	0.0158091
GO:0035457	cellular response to interferon-alpha	biological_process	8	2	519	7	18011	0.0158091
GO:0034145	positive regulation of toll-like receptor 4 signaling pathway	biological_process	10	2	519	7	18011	0.0158091
GO:0061180	mammary gland epithelium development	biological_process	7	2	519	7	18011	0.0158091
GO:0005089	Rho guanyl-nucleotide exchange factor activity	molecular_function	9	6	519	71	18011	0.0164273
GO:0043401	steroid hormone mediated signaling pathway	biological_process	6	5	519	52	18011	0.0166502
GO:0007155	cell adhesion	biological_process	4	14	519	257	18011	0.0173249
GO:0008236	serine-type peptidase activity	molecular_function	6	8	519	114	18011	0.0173377
GO:0001843	neural tube closure	biological_process	7	6	519	73	18011	0.0186179
GO:2000778	positive regulation of interleukin-6 secretion	biological_process	9	3	519	20	18011	0.0188299
GO:0048240	sperm capacitation	biological_process	5	3	519	20	18011	0.0188299
GO:0051015	actin filament binding	molecular_function	7	10	519	163	18011	0.019875
GO:0006811	ion transport	biological_process	6	18	519	367	18011	0.0203632
GO:0009142	nucleoside triphosphate biosynthetic process	biological_process	9	2	519	8	18011	0.0206803
GO:0070700	BMP receptor binding	molecular_function	8	2	519	8	18011	0.0206803
GO:0009311	oligosaccharide metabolic process	biological_process	6	2	519	8	18011	0.0206803
GO:0007217	tachykinin receptor signaling pathway	biological_process	6	2	519	8	18011	0.0206803
GO:0055078	sodium ion homeostasis	biological_process	10	2	519	8	18011	0.0206803
GO:0061025	membrane fusion	biological_process	6	3	519	21	18011	0.0215079
GO:0005887	integral component of plasma membrane	cellular_component	6	30	519	707	18011	0.0226887
GO:0051281	positive regulation of release of sequestered calcium ion into cytosol	biological_process	15	3	519	22	18011	0.024383
GO:0006807	nitrogen compound metabolic process	biological_process	4	3	519	22	18011	0.024383
GO:0035725	sodium ion transmembrane transport	biological_process	10	5	519	58	18011	0.0255433
GO:0071944	cell periphery	cellular_component	4	5	519	58	18011	0.0255433
GO:0043616	keratinocyte proliferation	biological_process	5	2	519	9	18011	0.0260874
GO:0032727	positive regulation of interferon-alpha production	biological_process	9	2	519	9	18011	0.0260874
GO:0007288	sperm axoneme assembly	biological_process	5	2	519	9	18011	0.0260874
GO:0071711	basement membrane organization	biological_process	7	2	519	9	18011	0.0260874
GO:0060429	epithelium development	biological_process	6	2	519	9	18011	0.0260874
GO:0046626	regulation of insulin receptor signaling pathway	biological_process	8	2	519	9	18011	0.0260874
GO:0006699	bile acid biosynthetic process	biological_process	8	2	519	9	18011	0.0260874
GO:0097284	hepatocyte apoptotic process	biological_process	8	2	519	9	18011	0.0260874
GO:0008237	metallopeptidase activity	molecular_function	7	8	519	124	18011	0.0271437
GO:0005251	delayed rectifier potassium channel activity	molecular_function	10	3	519	23	18011	0.0274549
GO:0008233	peptidase activity	molecular_function	5	15	519	301	18011	0.0286247
GO:0070251	pristanate-CoA ligase activity	molecular_function	7	1	519	1	18011	0.0288157
GO:2000211	regulation of glutamate metabolic process	biological_process	10	1	519	1	18011	0.0288157
GO:0061017	hepatoblast differentiation	biological_process	7	1	519	1	18011	0.0288157
GO:0072040	negative regulation of mesenchymal cell apoptotic process involved in nephron morphogenesis	biological_process	9	1	519	1	18011	0.0288157
GO:0004087	carbamoyl-phosphate synthase (ammonia) activity	molecular_function	6	1	519	1	18011	0.0288157
GO:0002508	central tolerance induction	biological_process	5	1	519	1	18011	0.0288157
GO:0070661	leukocyte proliferation	biological_process	4	1	519	1	18011	0.0288157
GO:0035695	mitophagy by induced vacuole formation	biological_process	8	1	519	1	18011	0.0288157
GO:0035565	regulation of pronephros size	biological_process	7	1	519	1	18011	0.0288157
GO:0036112	medium-chain fatty-acyl-CoA metabolic process	biological_process	9	1	519	1	18011	0.0288157
GO:1902710	GABA receptor complex	cellular_component	5	1	519	1	18011	0.0288157
GO:0046625	sphingolipid binding	molecular_function	5	1	519	1	18011	0.0288157
GO:2000108	positive regulation of leukocyte apoptotic process	biological_process	10	1	519	1	18011	0.0288157
GO:0072176	nephric duct development	biological_process	6	1	519	1	18011	0.0288157
GO:0014901	satellite cell activation involved in skeletal muscle regeneration	biological_process	6	1	519	1	18011	0.0288157
GO:1990834	response to odorant	biological_process	5	1	519	1	18011	0.0288157
GO:0090132	epithelium migration	biological_process	5	1	519	1	18011	0.0288157
GO:0016496	substance P receptor activity	molecular_function	9	1	519	1	18011	0.0288157
GO:1901248	positive regulation of lung ciliated cell differentiation	biological_process	9	1	519	1	18011	0.0288157
GO:0061296	negative regulation of mesenchymal cell apoptotic process involved in mesonephric nephron morphogenesis	biological_process	10	1	519	1	18011	0.0288157
GO:0039020	pronephric nephron tubule development	biological_process	8	1	519	1	18011	0.0288157
GO:1902216	positive regulation of interleukin-4-mediated signaling pathway	biological_process	10	1	519	1	18011	0.0288157
GO:0099156	cell-cell signaling via exosome	biological_process	6	1	519	1	18011	0.0288157
GO:0044773	mitotic DNA damage checkpoint	biological_process	8	1	519	1	18011	0.0288157
GO:0042404	thyroid hormone catabolic process	biological_process	8	1	519	1	18011	0.0288157
GO:0062000	positive regulation of cardiac endothelial to mesenchymal transition	biological_process	8	1	519	1	18011	0.0288157
GO:0044594	17-beta-hydroxysteroid dehydrogenase (NAD+) activity	molecular_function	7	1	519	1	18011	0.0288157
GO:0004566	beta-glucuronidase activity	molecular_function	7	1	519	1	18011	0.0288157
GO:0008405	arachidonic acid 11,12-epoxygenase activity	molecular_function	8	1	519	1	18011	0.0288157
GO:0008294	calcium- and calmodulin-responsive adenylate cyclase activity	molecular_function	6	1	519	1	18011	0.0288157
GO:0008523	sodium-dependent multivitamin transmembrane transporter activity	molecular_function	11	1	519	1	18011	0.0288157
GO:0019785	ISG15-specific protease activity	molecular_function	9	1	519	1	18011	0.0288157
GO:0070447	positive regulation of oligodendrocyte progenitor proliferation	biological_process	11	1	519	1	18011	0.0288157
GO:0008892	guanine deaminase activity	molecular_function	7	1	519	1	18011	0.0288157
GO:2000827	mitochondrial RNA surveillance	biological_process	11	1	519	1	18011	0.0288157
GO:0071751	secretory IgA immunoglobulin complex	cellular_component	8	1	519	1	18011	0.0288157
GO:0097728	9+0 motile cilium	cellular_component	6	1	519	1	18011	0.0288157
GO:0038161	prolactin signaling pathway	biological_process	6	1	519	1	18011	0.0288157
GO:0009444	pyruvate oxidation	biological_process	10	1	519	1	18011	0.0288157
GO:0038021	leptin receptor activity	molecular_function	7	1	519	1	18011	0.0288157
GO:0010819	regulation of T cell chemotaxis	biological_process	9	1	519	1	18011	0.0288157
GO:1901624	negative regulation of lymphocyte chemotaxis	biological_process	9	1	519	1	18011	0.0288157
GO:1990718	axonemal central pair projection	cellular_component	7	1	519	1	18011	0.0288157
GO:0120134	proximal portion of axoneme	cellular_component	7	1	519	1	18011	0.0288157
GO:0035945	mitochondrial ncRNA surveillance	biological_process	12	1	519	1	18011	0.0288157
GO:0002897	positive regulation of central B cell tolerance induction	biological_process	9	1	519	1	18011	0.0288157
GO:1903487	regulation of lactation	biological_process	6	1	519	1	18011	0.0288157
GO:0071748	monomeric IgA immunoglobulin complex	cellular_component	7	1	519	1	18011	0.0288157
GO:0015887	pantothenate transmembrane transport	biological_process	11	1	519	1	18011	0.0288157
GO:0045556	positive regulation of TRAIL biosynthetic process	biological_process	10	1	519	1	18011	0.0288157
GO:1904100	positive regulation of protein O-linked glycosylation	biological_process	11	1	519	1	18011	0.0288157
GO:0015864	pyrimidine nucleoside transport	biological_process	9	1	519	1	18011	0.0288157
GO:2001108	positive regulation of Rho guanyl-nucleotide exchange factor activity	biological_process	9	1	519	1	18011	0.0288157
GO:0005260	intracellularly ATP-gated chloride channel activity	molecular_function	9	1	519	1	18011	0.0288157
GO:1903786	regulation of glutathione biosynthetic process	biological_process	8	1	519	1	18011	0.0288157
GO:0044218	other organism cell membrane	cellular_component	5	1	519	1	18011	0.0288157
GO:0070287	ferritin receptor activity	molecular_function	4	1	519	1	18011	0.0288157
GO:0071752	secretory dimeric IgA immunoglobulin complex	cellular_component	9	1	519	1	18011	0.0288157
GO:0015878	biotin transport	biological_process	11	1	519	1	18011	0.0288157
GO:0015722	canalicular bile acid transport	biological_process	9	1	519	1	18011	0.0288157
GO:0072016	glomerular parietal epithelial cell development	biological_process	8	1	519	1	18011	0.0288157
GO:0004375	glycine dehydrogenase (decarboxylating) activity	molecular_function	7	1	519	1	18011	0.0288157
GO:0071614	linoleic acid epoxygenase activity	molecular_function	6	1	519	1	18011	0.0288157
GO:0005436	sodium:phosphate symporter activity	molecular_function	11	1	519	1	18011	0.0288157
GO:0030197	extracellular matrix constituent, lubricant activity	molecular_function	5	1	519	1	18011	0.0288157
GO:0051029	rRNA transport	biological_process	10	1	519	1	18011	0.0288157
GO:0008404	arachidonic acid 14,15-epoxygenase activity	molecular_function	8	1	519	1	18011	0.0288157
GO:0097156	fasciculation of motor neuron axon	biological_process	7	1	519	1	18011	0.0288157
GO:0099243	extrinsic component of synaptic membrane	cellular_component	6	1	519	1	18011	0.0288157
GO:0120135	distal portion of axoneme	cellular_component	7	1	519	1	18011	0.0288157
GO:0071756	pentameric IgM immunoglobulin complex	cellular_component	7	1	519	1	18011	0.0288157
GO:0090195	chemokine secretion	biological_process	12	1	519	1	18011	0.0288157
GO:0015054	gastrin receptor activity	molecular_function	7	1	519	1	18011	0.0288157
GO:1903718	cellular response to ammonia	biological_process	7	1	519	1	18011	0.0288157
GO:0070462	plus-end specific microtubule depolymerization	biological_process	10	1	519	1	18011	0.0288157
GO:0060404	axonemal microtubule depolymerization	biological_process	11	1	519	1	18011	0.0288157
GO:0033029	regulation of neutrophil apoptotic process	biological_process	6	1	519	1	18011	0.0288157
GO:0006921	cellular component disassembly involved in execution phase of apoptosis	biological_process	6	1	519	1	18011	0.0288157
GO:0060677	ureteric bud elongation	biological_process	6	1	519	1	18011	0.0288157
GO:0007522	visceral muscle development	biological_process	7	1	519	1	18011	0.0288157
GO:0033862	UMP kinase activity	molecular_function	9	1	519	1	18011	0.0288157
GO:1904205	negative regulation of skeletal muscle hypertrophy	biological_process	10	1	519	1	18011	0.0288157
GO:0009414	response to water deprivation	biological_process	5	1	519	1	18011	0.0288157
GO:0035377	transepithelial water transport	biological_process	8	1	519	1	18011	0.0288157
GO:0070963	positive regulation of neutrophil mediated killing of gram-negative bacterium	biological_process	10	1	519	1	18011	0.0288157
GO:0061090	positive regulation of sequestering of zinc ion	biological_process	7	1	519	1	18011	0.0288157
GO:0006766	vitamin metabolic process	biological_process	5	1	519	1	18011	0.0288157
GO:0140206	dipeptide import across plasma membrane	biological_process	12	1	519	1	18011	0.0288157
GO:2000097	regulation of smooth muscle cell-matrix adhesion	biological_process	8	1	519	1	18011	0.0288157
GO:0034465	response to carbon monoxide	biological_process	6	1	519	1	18011	0.0288157
GO:0042661	regulation of mesodermal cell fate specification	biological_process	9	1	519	1	18011	0.0288157
GO:0050429	calcium-dependent phospholipase C activity	molecular_function	9	1	519	1	18011	0.0288157
GO:0002642	positive regulation of immunoglobulin biosynthetic process	biological_process	10	1	519	1	18011	0.0288157
GO:1905059	calcium-transporting ATPase activity involved in regulation of postsynaptic cytosolic calcium ion concentration	molecular_function	11	1	519	1	18011	0.0288157
GO:1905025	negative regulation of membrane repolarization during ventricular cardiac muscle cell action potential	biological_process	8	1	519	1	18011	0.0288157
GO:0004990	oxytocin receptor activity	molecular_function	7	1	519	1	18011	0.0288157
GO:0007056	spindle assembly involved in female meiosis	biological_process	5	1	519	1	18011	0.0288157
GO:0001792	polymeric immunoglobulin receptor activity	molecular_function	7	1	519	1	18011	0.0288157
GO:0106138	Sec61 translocon complex binding	molecular_function	5	1	519	1	18011	0.0288157
GO:0015865	purine nucleotide transport	biological_process	9	1	519	1	18011	0.0288157
GO:0060416	response to growth hormone	biological_process	7	1	519	1	18011	0.0288157
GO:1901494	regulation of cysteine metabolic process	biological_process	10	1	519	1	18011	0.0288157
GO:0044793	negative regulation by host of viral process	biological_process	8	1	519	1	18011	0.0288157
GO:0036413	histone H3-R26 citrullination	biological_process	11	1	519	1	18011	0.0288157
GO:0046449	creatinine metabolic process	biological_process	8	1	519	1	18011	0.0288157
GO:0090198	negative regulation of chemokine secretion	biological_process	9	1	519	1	18011	0.0288157
GO:0036111	very long-chain fatty-acyl-CoA metabolic process	biological_process	9	1	519	1	18011	0.0288157
GO:0106030	neuron projection fasciculation	biological_process	8	1	519	1	18011	0.0288157
GO:0048144	fibroblast proliferation	biological_process	4	1	519	1	18011	0.0288157
GO:0034127	regulation of MyD88-independent toll-like receptor signaling pathway	biological_process	9	1	519	1	18011	0.0288157
GO:0031300	intrinsic component of organelle membrane	cellular_component	5	1	519	1	18011	0.0288157
GO:0015216	purine nucleotide transmembrane transporter activity	molecular_function	7	1	519	1	18011	0.0288157
GO:0034371	chylomicron remodeling	biological_process	10	1	519	1	18011	0.0288157
GO:0038097	positive regulation of mast cell activation by Fc-epsilon receptor signaling pathway	biological_process	8	1	519	1	18011	0.0288157
GO:0015126	canalicular bile acid transmembrane transporter activity	molecular_function	6	1	519	1	18011	0.0288157
GO:0008123	cholesterol 7-alpha-monooxygenase activity	molecular_function	7	1	519	1	18011	0.0288157
GO:1905188	positive regulation of metaphase/anaphase transition of meiosis I	biological_process	11	1	519	1	18011	0.0288157
GO:0085032	modulation by symbiont of host I-kappaB kinase/NF-kappaB cascade	biological_process	10	1	519	1	18011	0.0288157
GO:1902860	propionyl-CoA biosynthetic process	biological_process	10	1	519	1	18011	0.0288157
GO:0004900	erythropoietin receptor activity	molecular_function	7	1	519	1	18011	0.0288157
GO:0140074	cardiac endothelial to mesenchymal transition	biological_process	7	1	519	1	18011	0.0288157
GO:0003142	cardiogenic plate morphogenesis	biological_process	5	1	519	1	18011	0.0288157
GO:1904708	regulation of granulosa cell apoptotic process	biological_process	10	1	519	1	18011	0.0288157
GO:2001203	positive regulation of transforming growth factor-beta secretion	biological_process	9	1	519	1	18011	0.0288157
GO:0043000	Golgi to plasma membrane CFTR protein transport	biological_process	11	1	519	1	18011	0.0288157
GO:0045368	positive regulation of interleukin-13 biosynthetic process	biological_process	9	1	519	1	18011	0.0288157
GO:0090251	protein localization involved in establishment of planar polarity	biological_process	7	1	519	1	18011	0.0288157
GO:0045404	positive regulation of interleukin-4 biosynthetic process	biological_process	9	1	519	1	18011	0.0288157
GO:1902943	positive regulation of voltage-gated chloride channel activity	biological_process	10	1	519	1	18011	0.0288157
GO:2000043	regulation of cardiac cell fate specification	biological_process	9	1	519	1	18011	0.0288157
GO:0097161	DH domain binding	molecular_function	6	1	519	1	18011	0.0288157
GO:0004925	prolactin receptor activity	molecular_function	7	1	519	1	18011	0.0288157
GO:0051886	negative regulation of timing of anagen	biological_process	10	1	519	1	18011	0.0288157
GO:0000268	peroxisome targeting sequence binding	molecular_function	7	1	519	1	18011	0.0288157
GO:0060262	negative regulation of N-terminal protein palmitoylation	biological_process	11	1	519	1	18011	0.0288157
GO:0051695	actin filament uncapping	biological_process	10	1	519	1	18011	0.0288157
GO:0016497	substance K receptor activity	molecular_function	9	1	519	1	18011	0.0288157
GO:0003353	positive regulation of cilium movement	biological_process	9	1	519	1	18011	0.0288157
GO:0072608	interleukin-10 secretion	biological_process	12	1	519	1	18011	0.0288157
GO:0015390	purine-specific nucleoside:sodium symporter activity	molecular_function	11	1	519	1	18011	0.0288157
GO:1902161	positive regulation of cyclic nucleotide-gated ion channel activity	biological_process	8	1	519	1	18011	0.0288157
GO:0071750	dimeric IgA immunoglobulin complex	cellular_component	8	1	519	1	18011	0.0288157
GO:0006147	guanine catabolic process	biological_process	11	1	519	1	18011	0.0288157
GO:0061837	neuropeptide processing	biological_process	9	1	519	1	18011	0.0288157
GO:0016453	C-acetyltransferase activity	molecular_function	8	1	519	1	18011	0.0288157
GO:0050197	phytanate-CoA ligase activity	molecular_function	7	1	519	1	18011	0.0288157
GO:0035946	mitochondrial mRNA surveillance	biological_process	12	1	519	1	18011	0.0288157
GO:0061586	positive regulation of transcription by transcription factor localization	biological_process	7	1	519	1	18011	0.0288157
GO:0060807	regulation of transcription from RNA polymerase II promoter involved in definitive endodermal cell fate specification	biological_process	12	1	519	1	18011	0.0288157
GO:1900212	negative regulation of mesenchymal cell apoptotic process involved in metanephros development	biological_process	10	1	519	1	18011	0.0288157
GO:0051673	membrane disruption in other organism	biological_process	6	1	519	1	18011	0.0288157
GO:0060739	mesenchymal-epithelial cell signaling involved in prostate gland development	biological_process	4	1	519	1	18011	0.0288157
GO:0048731	system development	biological_process	5	1	519	1	18011	0.0288157
GO:0046209	nitric oxide metabolic process	biological_process	6	1	519	1	18011	0.0288157
GO:0015382	sodium:sulfate symporter activity	molecular_function	10	1	519	1	18011	0.0288157
GO:0001730	2'-5'-oligoadenylate synthetase activity	molecular_function	8	1	519	1	18011	0.0288157
GO:0070409	carbamoyl phosphate biosynthetic process	biological_process	7	1	519	1	18011	0.0288157
GO:0042626	ATPase activity, coupled to transmembrane movement of substances	molecular_function	8	5	519	60	18011	0.0290709
GO:0035023	regulation of Rho protein signal transduction	biological_process	11	6	519	81	18011	0.02936
GO:0006464	cellular protein modification process	biological_process	8	4	519	41	18011	0.0297776
GO:0097546	ciliary base	cellular_component	5	3	519	24	18011	0.0307228
GO:0004869	cysteine-type endopeptidase inhibitor activity	molecular_function	8	3	519	24	18011	0.0307228
GO:0071625	vocalization behavior	biological_process	4	2	519	10	18011	0.0319958
GO:0034116	positive regulation of heterotypic cell-cell adhesion	biological_process	8	2	519	10	18011	0.0319958
GO:0060644	mammary gland epithelial cell differentiation	biological_process	7	2	519	10	18011	0.0319958
GO:0008235	metalloexopeptidase activity	molecular_function	8	2	519	10	18011	0.0319958
GO:0003823	antigen binding	molecular_function	4	2	519	10	18011	0.0319958
GO:0042119	neutrophil activation	biological_process	8	2	519	10	18011	0.0319958
GO:1904469	positive regulation of tumor necrosis factor secretion	biological_process	10	2	519	10	18011	0.0319958
GO:1900025	negative regulation of substrate adhesion-dependent cell spreading	biological_process	10	2	519	10	18011	0.0319958
GO:0097060	synaptic membrane	cellular_component	4	2	519	10	18011	0.0319958
GO:0005388	calcium-transporting ATPase activity	molecular_function	10	2	519	10	18011	0.0319958
GO:0045580	regulation of T cell differentiation	biological_process	9	2	519	10	18011	0.0319958
GO:0045087	innate immune response	biological_process	5	8	519	129	18011	0.0332624
GO:0052689	carboxylic ester hydrolase activity	molecular_function	6	3	519	25	18011	0.0341855
GO:0017046	peptide hormone binding	molecular_function	6	3	519	25	18011	0.0341855
GO:0008076	voltage-gated potassium channel complex	cellular_component	9	5	519	63	18011	0.034914
GO:0016323	basolateral plasma membrane	cellular_component	5	7	519	107	18011	0.0351103
GO:0007156	homophilic cell adhesion via plasma membrane adhesion molecules	biological_process	7	7	519	108	18011	0.0366527
GO:0005044	scavenger receptor activity	molecular_function	4	4	519	44	18011	0.037341
GO:0005902	microvillus	cellular_component	7	4	519	44	18011	0.037341
GO:0043014	alpha-tubulin binding	molecular_function	7	3	519	26	18011	0.0378414
GO:0046034	ATP metabolic process	biological_process	4	3	519	26	18011	0.0378414
GO:0000146	microfilament motor activity	molecular_function	10	2	519	11	18011	0.0383721
GO:0006970	response to osmotic stress	biological_process	5	2	519	11	18011	0.0383721
GO:0050673	epithelial cell proliferation	biological_process	4	2	519	11	18011	0.0383721
GO:0031005	filamin binding	molecular_function	6	2	519	11	18011	0.0383721
GO:0022408	negative regulation of cell-cell adhesion	biological_process	7	2	519	11	18011	0.0383721
GO:0050678	regulation of epithelial cell proliferation	biological_process	7	2	519	11	18011	0.0383721
GO:0048265	response to pain	biological_process	6	2	519	11	18011	0.0383721
GO:0001223	transcription coactivator binding	molecular_function	7	2	519	11	18011	0.0383721
GO:0007588	excretion	biological_process	5	2	519	11	18011	0.0383721
GO:0034622	cellular protein-containing complex assembly	biological_process	7	2	519	11	18011	0.0383721
GO:0007565	female pregnancy	biological_process	5	2	519	11	18011	0.0383721
GO:0055085	transmembrane transport	biological_process	6	23	519	537	18011	0.0387516
GO:0005604	basement membrane	cellular_component	6	5	519	65	18011	0.0391847
GO:0043005	neuron projection	cellular_component	5	11	519	209	18011	0.040196
GO:0043235	receptor complex	cellular_component	4	9	519	159	18011	0.0409915
GO:0099056	integral component of presynaptic membrane	cellular_component	6	3	519	27	18011	0.0416883
GO:0030018	Z disc	cellular_component	5	5	519	67	18011	0.0437601
GO:0015721	bile acid and bile salt transport	biological_process	8	2	519	12	18011	0.0451846
GO:0060411	cardiac septum morphogenesis	biological_process	5	2	519	12	18011	0.0451846
GO:1903204	negative regulation of oxidative stress-induced neuron death	biological_process	9	2	519	12	18011	0.0451846
GO:0030544	Hsp70 protein binding	molecular_function	6	3	519	28	18011	0.0457237
GO:0120162	positive regulation of cold-induced thermogenesis	biological_process	7	5	519	68	18011	0.0461628
GO:0015630	microtubule cytoskeleton	cellular_component	7	8	519	138	18011	0.0465137
GO:0005198	structural molecule activity	molecular_function	3	9	519	165	18011	0.0497959
GO:0042127	regulation of cell population proliferation	biological_process	6	8	519	140	18011	0.0498671
GO:0032587	ruffle membrane	cellular_component	6	4	519	49	18011	0.0521771
GO:0030048	actin filament-based movement	biological_process	5	2	519	13	18011	0.0524029
GO:0055075	potassium ion homeostasis	biological_process	10	2	519	13	18011	0.0524029
GO:1900273	positive regulation of long-term synaptic potentiation	biological_process	9	2	519	13	18011	0.0524029
GO:0030057	desmosome	cellular_component	5	2	519	13	18011	0.0524029
GO:0019433	triglyceride catabolic process	biological_process	10	2	519	13	18011	0.0524029
GO:0000038	very long-chain fatty acid metabolic process	biological_process	10	2	519	13	18011	0.0524029
GO:0032809	neuronal cell body membrane	cellular_component	6	2	519	13	18011	0.0524029
GO:0051480	regulation of cytosolic calcium ion concentration	biological_process	12	3	519	30	18011	0.0543486
GO:0030198	extracellular matrix organization	biological_process	6	7	519	119	18011	0.0565973
GO:1901253	negative regulation of intracellular transport of viral material	biological_process	7	1	519	2	18011	0.0568027
GO:0060489	planar dichotomous subdivision of terminal units involved in lung branching morphogenesis	biological_process	9	1	519	2	18011	0.0568027
GO:0016598	protein arginylation	biological_process	9	1	519	2	18011	0.0568027
GO:0045082	positive regulation of interleukin-10 biosynthetic process	biological_process	9	1	519	2	18011	0.0568027
GO:0048021	regulation of melanin biosynthetic process	biological_process	8	1	519	2	18011	0.0568027
GO:0004088	carbamoyl-phosphate synthase (glutamine-hydrolyzing) activity	molecular_function	7	1	519	2	18011	0.0568027
GO:0003835	beta-galactoside alpha-2,6-sialyltransferase activity	molecular_function	7	1	519	2	18011	0.0568027
GO:0006359	regulation of transcription by RNA polymerase III	biological_process	9	1	519	2	18011	0.0568027
GO:1903817	negative regulation of voltage-gated potassium channel activity	biological_process	9	1	519	2	18011	0.0568027
GO:0070736	protein-glycine ligase activity, initiating	molecular_function	8	1	519	2	18011	0.0568027
GO:1901740	negative regulation of myoblast fusion	biological_process	11	1	519	2	18011	0.0568027
GO:0042663	regulation of endodermal cell fate specification	biological_process	9	1	519	2	18011	0.0568027
GO:0003308	negative regulation of Wnt signaling pathway involved in heart development	biological_process	10	1	519	2	18011	0.0568027
GO:0061010	gall bladder development	biological_process	6	1	519	2	18011	0.0568027
GO:1900135	positive regulation of renin secretion into blood stream	biological_process	11	1	519	2	18011	0.0568027
GO:0016508	long-chain-enoyl-CoA hydratase activity	molecular_function	7	1	519	2	18011	0.0568027
GO:1905198	manchette assembly	biological_process	5	1	519	2	18011	0.0568027
GO:0033326	cerebrospinal fluid secretion	biological_process	8	1	519	2	18011	0.0568027
GO:0098966	perisynaptic extracellular matrix	cellular_component	5	1	519	2	18011	0.0568027
GO:0019732	antifungal humoral response	biological_process	7	1	519	2	18011	0.0568027
GO:0002544	chronic inflammatory response	biological_process	7	1	519	2	18011	0.0568027
GO:0004781	sulfate adenylyltransferase (ATP) activity	molecular_function	9	1	519	2	18011	0.0568027
GO:0090651	apical cytoplasm	cellular_component	6	1	519	2	18011	0.0568027
GO:1904106	protein localization to microvillus	biological_process	6	1	519	2	18011	0.0568027
GO:0002635	negative regulation of germinal center formation	biological_process	10	1	519	2	18011	0.0568027
GO:0097155	fasciculation of sensory neuron axon	biological_process	7	1	519	2	18011	0.0568027
GO:0045062	extrathymic T cell selection	biological_process	5	1	519	2	18011	0.0568027
GO:0050428	3'-phosphoadenosine 5'-phosphosulfate biosynthetic process	biological_process	12	1	519	2	18011	0.0568027
GO:0070735	protein-glycine ligase activity	molecular_function	7	1	519	2	18011	0.0568027
GO:0097513	myosin II filament	cellular_component	6	1	519	2	18011	0.0568027
GO:0072125	negative regulation of glomerular mesangial cell proliferation	biological_process	10	1	519	2	18011	0.0568027
GO:0045624	positive regulation of T-helper cell differentiation	biological_process	8	1	519	2	18011	0.0568027
GO:0099080	supramolecular complex	cellular_component	3	1	519	2	18011	0.0568027
GO:2000156	regulation of retrograde vesicle-mediated transport, Golgi to ER	biological_process	7	1	519	2	18011	0.0568027
GO:0035812	renal sodium excretion	biological_process	6	1	519	2	18011	0.0568027
GO:0045025	mitochondrial degradosome	cellular_component	7	1	519	2	18011	0.0568027
GO:0032608	interferon-beta production	biological_process	6	1	519	2	18011	0.0568027
GO:0007635	chemosensory behavior	biological_process	4	1	519	2	18011	0.0568027
GO:0003096	renal sodium ion transport	biological_process	6	1	519	2	18011	0.0568027
GO:0003350	pulmonary myocardium development	biological_process	8	1	519	2	18011	0.0568027
GO:0072359	circulatory system development	biological_process	6	1	519	2	18011	0.0568027
GO:1903051	negative regulation of proteolysis involved in cellular protein catabolic process	biological_process	10	1	519	2	18011	0.0568027
GO:0034458	3'-5' RNA helicase activity	molecular_function	11	1	519	2	18011	0.0568027
GO:0048866	stem cell fate specification	biological_process	6	1	519	2	18011	0.0568027
GO:1905517	macrophage migration	biological_process	6	1	519	2	18011	0.0568027
GO:1904209	positive regulation of chemokine (C-C motif) ligand 2 secretion	biological_process	10	1	519	2	18011	0.0568027
GO:0048550	negative regulation of pinocytosis	biological_process	9	1	519	2	18011	0.0568027
GO:0050145	nucleoside monophosphate kinase activity	molecular_function	7	1	519	2	18011	0.0568027
GO:0032982	myosin filament	cellular_component	5	1	519	2	18011	0.0568027
GO:0072181	mesonephric duct formation	biological_process	10	1	519	2	18011	0.0568027
GO:0043604	amide biosynthetic process	biological_process	7	1	519	2	18011	0.0568027
GO:0097124	cyclin A2-CDK2 complex	cellular_component	6	1	519	2	18011	0.0568027
GO:0004465	lipoprotein lipase activity	molecular_function	8	1	519	2	18011	0.0568027
GO:0018094	protein polyglycylation	biological_process	11	1	519	2	18011	0.0568027
GO:0031346	positive regulation of cell projection organization	biological_process	8	1	519	2	18011	0.0568027
GO:0070739	protein-glutamic acid ligase activity	molecular_function	7	1	519	2	18011	0.0568027
GO:0021551	central nervous system morphogenesis	biological_process	5	1	519	2	18011	0.0568027
GO:0005594	collagen type IX trimer	cellular_component	6	1	519	2	18011	0.0568027
GO:0072134	nephrogenic mesenchyme morphogenesis	biological_process	8	1	519	2	18011	0.0568027
GO:0007493	endodermal cell fate determination	biological_process	6	1	519	2	18011	0.0568027
GO:0061572	actin filament bundle organization	biological_process	7	1	519	2	18011	0.0568027
GO:0070080	titin Z domain binding	molecular_function	6	1	519	2	18011	0.0568027
GO:0015389	pyrimidine- and adenine-specific:sodium symporter activity	molecular_function	7	1	519	2	18011	0.0568027
GO:0070827	chromatin maintenance	biological_process	6	1	519	2	18011	0.0568027
GO:0035545	determination of left/right asymmetry in nervous system	biological_process	8	1	519	2	18011	0.0568027
GO:0071642	positive regulation of macrophage inflammatory protein 1 alpha production	biological_process	9	1	519	2	18011	0.0568027
GO:0005052	peroxisome matrix targeting signal-1 binding	molecular_function	8	1	519	2	18011	0.0568027
GO:0000962	positive regulation of mitochondrial RNA catabolic process	biological_process	9	1	519	2	18011	0.0568027
GO:0034124	regulation of MyD88-dependent toll-like receptor signaling pathway	biological_process	9	1	519	2	18011	0.0568027
GO:0009994	oocyte differentiation	biological_process	5	1	519	2	18011	0.0568027
GO:1903039	positive regulation of leukocyte cell-cell adhesion	biological_process	8	1	519	2	18011	0.0568027
GO:0060420	regulation of heart growth	biological_process	8	1	519	2	18011	0.0568027
GO:0033007	negative regulation of mast cell activation involved in immune response	biological_process	8	1	519	2	18011	0.0568027
GO:0070897	transcription preinitiation complex assembly	biological_process	9	1	519	2	18011	0.0568027
GO:0030665	clathrin-coated vesicle membrane	cellular_component	8	1	519	2	18011	0.0568027
GO:0001828	inner cell mass cellular morphogenesis	biological_process	8	1	519	2	18011	0.0568027
GO:0060083	smooth muscle contraction involved in micturition	biological_process	10	1	519	2	18011	0.0568027
GO:0060490	lateral sprouting involved in lung morphogenesis	biological_process	8	1	519	2	18011	0.0568027
GO:0000958	mitochondrial mRNA catabolic process	biological_process	11	1	519	2	18011	0.0568027
GO:1901475	pyruvate transmembrane transport	biological_process	12	1	519	2	18011	0.0568027
GO:1904591	positive regulation of protein import	biological_process	8	1	519	2	18011	0.0568027
GO:0061026	cardiac muscle tissue regeneration	biological_process	7	1	519	2	18011	0.0568027
GO:0070506	high-density lipoprotein particle receptor activity	molecular_function	5	1	519	2	18011	0.0568027
GO:0071791	chemokine (C-C motif) ligand 5 binding	molecular_function	8	1	519	2	18011	0.0568027
GO:0099179	regulation of synaptic membrane adhesion	biological_process	7	1	519	2	18011	0.0568027
GO:0043605	cellular amide catabolic process	biological_process	7	1	519	2	18011	0.0568027
GO:0019391	glucuronoside catabolic process	biological_process	9	1	519	2	18011	0.0568027
GO:0035481	positive regulation of Notch signaling pathway involved in heart induction	biological_process	10	1	519	2	18011	0.0568027
GO:0038093	Fc receptor signaling pathway	biological_process	7	1	519	2	18011	0.0568027
GO:0043311	positive regulation of eosinophil degranulation	biological_process	10	1	519	2	18011	0.0568027
GO:0033106	cis-Golgi network membrane	cellular_component	7	1	519	2	18011	0.0568027
GO:0018479	benzaldehyde dehydrogenase (NAD+) activity	molecular_function	8	1	519	2	18011	0.0568027
GO:0097123	cyclin A1-CDK2 complex	cellular_component	6	1	519	2	18011	0.0568027
GO:0046952	ketone body catabolic process	biological_process	7	1	519	2	18011	0.0568027
GO:0010848	regulation of chromatin disassembly	biological_process	11	1	519	2	18011	0.0568027
GO:0006546	glycine catabolic process	biological_process	12	1	519	2	18011	0.0568027
GO:0031235	intrinsic component of the cytoplasmic side of the plasma membrane	cellular_component	6	1	519	2	18011	0.0568027
GO:0042489	negative regulation of odontogenesis of dentin-containing tooth	biological_process	10	1	519	2	18011	0.0568027
GO:0035902	response to immobilization stress	biological_process	5	1	519	2	18011	0.0568027
GO:0086097	phospholipase C-activating angiotensin-activated signaling pathway	biological_process	7	1	519	2	18011	0.0568027
GO:1905419	sperm flagellum movement involved in flagellated sperm motility	biological_process	4	1	519	2	18011	0.0568027
GO:1902632	positive regulation of membrane hyperpolarization	biological_process	6	1	519	2	18011	0.0568027
GO:0007621	negative regulation of female receptivity	biological_process	8	1	519	2	18011	0.0568027
GO:0034157	positive regulation of toll-like receptor 7 signaling pathway	biological_process	10	1	519	2	18011	0.0568027
GO:0090191	negative regulation of branching involved in ureteric bud morphogenesis	biological_process	10	1	519	2	18011	0.0568027
GO:0072385	minus-end-directed organelle transport along microtubule	biological_process	10	1	519	2	18011	0.0568027
GO:1901228	positive regulation of transcription from RNA polymerase II promoter involved in heart development	biological_process	11	1	519	2	18011	0.0568027
GO:0000965	mitochondrial RNA 3'-end processing	biological_process	11	1	519	2	18011	0.0568027
GO:0006550	isoleucine catabolic process	biological_process	11	1	519	2	18011	0.0568027
GO:1901862	negative regulation of muscle tissue development	biological_process	7	1	519	2	18011	0.0568027
GO:0071492	cellular response to UV-A	biological_process	9	1	519	2	18011	0.0568027
GO:0005583	fibrillar collagen trimer	cellular_component	5	1	519	2	18011	0.0568027
GO:0019862	IgA binding	molecular_function	6	1	519	2	18011	0.0568027
GO:0098531	ligand-activated transcription factor activity	molecular_function	5	1	519	2	18011	0.0568027
GO:0015410	manganese-transporting ATPase activity	molecular_function	11	1	519	2	18011	0.0568027
GO:0060073	micturition	biological_process	6	1	519	2	18011	0.0568027
GO:0002415	immunoglobulin transcytosis in epithelial cells mediated by polymeric immunoglobulin receptor	biological_process	9	1	519	2	18011	0.0568027
GO:0140058	neuron projection arborization	biological_process	9	1	519	2	18011	0.0568027
GO:0071886	1-(4-iodo-2,5-dimethoxyphenyl)propan-2-amine binding	molecular_function	5	1	519	2	18011	0.0568027
GO:0016603	glutaminyl-peptide cyclotransferase activity	molecular_function	7	1	519	2	18011	0.0568027
GO:0072249	metanephric glomerular visceral epithelial cell development	biological_process	9	1	519	2	18011	0.0568027
GO:0051311	meiotic metaphase plate congression	biological_process	9	1	519	2	18011	0.0568027
GO:0035710	CD4-positive, alpha-beta T cell activation	biological_process	9	1	519	2	18011	0.0568027
GO:0055096	low-density lipoprotein particle mediated signaling	biological_process	6	1	519	2	18011	0.0568027
GO:0015860	purine nucleoside transmembrane transport	biological_process	8	1	519	2	18011	0.0568027
GO:2001287	negative regulation of caveolin-mediated endocytosis	biological_process	9	1	519	2	18011	0.0568027
GO:0061031	endodermal digestive tract morphogenesis	biological_process	7	1	519	2	18011	0.0568027
GO:0004020	adenylylsulfate kinase activity	molecular_function	7	1	519	2	18011	0.0568027
GO:0035717	chemokine (C-C motif) ligand 7 binding	molecular_function	8	1	519	2	18011	0.0568027
GO:0004800	thyroxine 5'-deiodinase activity	molecular_function	5	1	519	2	18011	0.0568027
GO:0032765	positive regulation of mast cell cytokine production	biological_process	9	1	519	2	18011	0.0568027
GO:0097089	methyl-branched fatty acid metabolic process	biological_process	10	1	519	2	18011	0.0568027
GO:1902937	inward rectifier potassium channel complex	cellular_component	10	1	519	2	18011	0.0568027
GO:0150076	neuroinflammatory response	biological_process	7	1	519	2	18011	0.0568027
GO:1900229	negative regulation of single-species biofilm formation in or on host organism	biological_process	8	1	519	2	18011	0.0568027
GO:0002276	basophil activation involved in immune response	biological_process	8	1	519	2	18011	0.0568027
GO:0039529	RIG-I signaling pathway	biological_process	9	1	519	2	18011	0.0568027
GO:0060488	orthogonal dichotomous subdivision of terminal units involved in lung branching morphogenesis	biological_process	9	1	519	2	18011	0.0568027
GO:1901382	regulation of chorionic trophoblast cell proliferation	biological_process	7	1	519	2	18011	0.0568027
GO:0035821	modification of morphology or physiology of other organism	biological_process	5	1	519	2	18011	0.0568027
GO:0060700	regulation of ribonuclease activity	biological_process	9	1	519	2	18011	0.0568027
GO:0017186	peptidyl-pyroglutamic acid biosynthetic process, using glutaminyl-peptide cyclotransferase	biological_process	11	1	519	2	18011	0.0568027
GO:0048710	regulation of astrocyte differentiation	biological_process	11	1	519	2	18011	0.0568027
GO:0002924	negative regulation of humoral immune response mediated by circulating immunoglobulin	biological_process	12	1	519	2	18011	0.0568027
GO:0035841	new growing cell tip	cellular_component	6	1	519	2	18011	0.0568027
GO:0072136	metanephric mesenchymal cell proliferation involved in metanephros development	biological_process	6	1	519	2	18011	0.0568027
GO:0001866	NK T cell proliferation	biological_process	10	1	519	2	18011	0.0568027
GO:0046356	acetyl-CoA catabolic process	biological_process	9	1	519	2	18011	0.0568027
GO:0070667	negative regulation of mast cell proliferation	biological_process	9	1	519	2	18011	0.0568027
GO:0071914	prominosome	cellular_component	7	1	519	2	18011	0.0568027
GO:0034775	glutathione transmembrane transport	biological_process	10	1	519	2	18011	0.0568027
GO:1905069	allantois development	biological_process	6	1	519	2	18011	0.0568027
GO:0072179	nephric duct formation	biological_process	7	1	519	2	18011	0.0568027
GO:0046879	hormone secretion	biological_process	7	1	519	2	18011	0.0568027
GO:0070487	monocyte aggregation	biological_process	8	1	519	2	18011	0.0568027
GO:0090494	dopamine uptake	biological_process	10	1	519	2	18011	0.0568027
GO:0044380	protein localization to cytoskeleton	biological_process	8	1	519	2	18011	0.0568027
GO:0003707	steroid hormone receptor activity	molecular_function	5	4	519	51	18011	0.0588882
GO:0086091	regulation of heart rate by cardiac conduction	biological_process	10	3	519	31	18011	0.0589315
GO:0007286	spermatid development	biological_process	6	5	519	73	18011	0.0593342
GO:0034341	response to interferon-gamma	biological_process	7	2	519	14	18011	0.0599981
GO:0021591	ventricular system development	biological_process	6	2	519	14	18011	0.0599981
GO:0051493	regulation of cytoskeleton organization	biological_process	8	2	519	14	18011	0.0599981
GO:0006865	amino acid transport	biological_process	10	2	519	14	18011	0.0599981
GO:0004707	MAP kinase activity	molecular_function	9	2	519	14	18011	0.0599981
GO:0000266	mitochondrial fission	biological_process	7	2	519	14	18011	0.0599981
GO:0090026	positive regulation of monocyte chemotaxis	biological_process	9	2	519	14	18011	0.0599981
GO:0005911	cell-cell junction	cellular_component	4	8	519	147	18011	0.0628166
GO:0045893	positive regulation of transcription, DNA-templated	biological_process	9	21	519	510	18011	0.0651849
GO:0046940	nucleoside monophosphate phosphorylation	biological_process	9	2	519	15	18011	0.0679426
GO:0007568	aging	biological_process	4	2	519	15	18011	0.0679426
GO:1902017	regulation of cilium assembly	biological_process	10	2	519	15	18011	0.0679426
GO:0009612	response to mechanical stimulus	biological_process	5	2	519	15	18011	0.0679426
GO:0016811	hydrolase activity, acting on carbon-nitrogen (but not peptide) bonds, in linear amides	molecular_function	6	2	519	15	18011	0.0679426
GO:0010633	negative regulation of epithelial cell migration	biological_process	9	2	519	15	18011	0.0679426
GO:0034707	chloride channel complex	cellular_component	7	2	519	15	18011	0.0679426
GO:0046597	negative regulation of viral entry into host cell	biological_process	10	2	519	15	18011	0.0679426
GO:0045104	intermediate filament cytoskeleton organization	biological_process	7	2	519	15	18011	0.0679426
GO:0006874	cellular calcium ion homeostasis	biological_process	11	5	519	76	18011	0.0681626
GO:0006139	nucleobase-containing compound metabolic process	biological_process	6	3	519	33	18011	0.0686197
GO:0032391	photoreceptor connecting cilium	cellular_component	6	3	519	33	18011	0.0686197
GO:0007507	heart development	biological_process	6	9	519	178	18011	0.0729093
GO:0007416	synapse assembly	biological_process	6	3	519	34	18011	0.073717
GO:0016787	hydrolase activity	molecular_function	4	30	519	790	18011	0.0756372
GO:0045921	positive regulation of exocytosis	biological_process	8	2	519	16	18011	0.07621
GO:0060307	regulation of ventricular cardiac muscle cell membrane repolarization	biological_process	11	2	519	16	18011	0.07621
GO:0023019	signal transduction involved in regulation of gene expression	biological_process	5	2	519	16	18011	0.07621
GO:0030111	regulation of Wnt signaling pathway	biological_process	8	2	519	16	18011	0.07621
GO:0004602	glutathione peroxidase activity	molecular_function	5	2	519	16	18011	0.07621
GO:0006401	RNA catabolic process	biological_process	9	2	519	16	18011	0.07621
GO:0030506	ankyrin binding	molecular_function	6	2	519	16	18011	0.07621
GO:0072659	protein localization to plasma membrane	biological_process	8	6	519	103	18011	0.0772155
GO:0042472	inner ear morphogenesis	biological_process	6	4	519	56	18011	0.0775609
GO:0016757	transferase activity, transferring glycosyl groups	molecular_function	5	8	519	155	18011	0.0799695
GO:0005882	intermediate filament	cellular_component	7	6	519	104	18011	0.0800608
GO:0031982	vesicle	cellular_component	5	5	519	80	18011	0.081001
GO:0003725	double-stranded RNA binding	molecular_function	7	4	519	57	18011	0.0816117
GO:0002376	immune system process	biological_process	3	4	519	57	18011	0.0816117
GO:0032607	interferon-alpha production	biological_process	6	1	519	3	18011	0.0839846
GO:0015746	citrate transport	biological_process	11	1	519	3	18011	0.0839846
GO:0003352	regulation of cilium movement	biological_process	8	1	519	3	18011	0.0839846
GO:0010255	glucose mediated signaling pathway	biological_process	8	1	519	3	18011	0.0839846
GO:0014908	myotube differentiation involved in skeletal muscle regeneration	biological_process	9	1	519	3	18011	0.0839846
GO:0006873	cellular ion homeostasis	biological_process	8	1	519	3	18011	0.0839846
GO:0017159	pantetheine hydrolase activity	molecular_function	7	1	519	3	18011	0.0839846
GO:0015939	pantothenate metabolic process	biological_process	6	1	519	3	18011	0.0839846
GO:0006526	arginine biosynthetic process	biological_process	12	1	519	3	18011	0.0839846
GO:0098971	anterograde dendritic transport of neurotransmitter receptor complex	biological_process	8	1	519	3	18011	0.0839846
GO:0120001	apical plasma membrane urothelial plaque	cellular_component	7	1	519	3	18011	0.0839846
GO:0042392	sphingosine-1-phosphate phosphatase activity	molecular_function	8	1	519	3	18011	0.0839846
GO:0004965	G protein-coupled GABA receptor activity	molecular_function	7	1	519	3	18011	0.0839846
GO:0042571	immunoglobulin complex, circulating	cellular_component	5	1	519	3	18011	0.0839846
GO:0061009	common bile duct development	biological_process	6	1	519	3	18011	0.0839846
GO:0016460	myosin II complex	cellular_component	5	1	519	3	18011	0.0839846
GO:0015855	pyrimidine nucleobase transport	biological_process	8	1	519	3	18011	0.0839846
GO:0035928	rRNA import into mitochondrion	biological_process	11	1	519	3	18011	0.0839846
GO:0072133	metanephric mesenchyme morphogenesis	biological_process	8	1	519	3	18011	0.0839846
GO:1905832	positive regulation of spindle assembly	biological_process	10	1	519	3	18011	0.0839846
GO:1900245	positive regulation of MDA-5 signaling pathway	biological_process	8	1	519	3	18011	0.0839846
GO:0032385	positive regulation of intracellular cholesterol transport	biological_process	11	1	519	3	18011	0.0839846
GO:0071357	cellular response to type I interferon	biological_process	8	1	519	3	18011	0.0839846
GO:0031670	cellular response to nutrient	biological_process	8	1	519	3	18011	0.0839846
GO:0071422	succinate transmembrane transport	biological_process	8	1	519	3	18011	0.0839846
GO:0070125	mitochondrial translational elongation	biological_process	9	1	519	3	18011	0.0839846
GO:0007431	salivary gland development	biological_process	7	1	519	3	18011	0.0839846
GO:0000253	3-keto sterol reductase activity	molecular_function	7	1	519	3	18011	0.0839846
GO:0044341	sodium-dependent phosphate transport	biological_process	10	1	519	3	18011	0.0839846
GO:0060528	secretory columnal luminar epithelial cell differentiation involved in prostate glandular acinus development	biological_process	9	1	519	3	18011	0.0839846
GO:0005415	nucleoside:sodium symporter activity	molecular_function	7	1	519	3	18011	0.0839846
GO:0044547	DNA topoisomerase binding	molecular_function	6	1	519	3	18011	0.0839846
GO:0061182	negative regulation of chondrocyte development	biological_process	9	1	519	3	18011	0.0839846
GO:0097029	mature conventional dendritic cell differentiation	biological_process	8	1	519	3	18011	0.0839846
GO:0004605	phosphatidate cytidylyltransferase activity	molecular_function	8	1	519	3	18011	0.0839846
GO:0006835	dicarboxylic acid transport	biological_process	10	1	519	3	18011	0.0839846
GO:0008142	oxysterol binding	molecular_function	7	1	519	3	18011	0.0839846
GO:0032364	oxygen homeostasis	biological_process	8	1	519	3	18011	0.0839846
GO:0008430	selenium binding	molecular_function	4	1	519	3	18011	0.0839846
GO:0051707	response to other organism	biological_process	6	1	519	3	18011	0.0839846
GO:0060402	calcium ion transport into cytosol	biological_process	14	1	519	3	18011	0.0839846
GO:0031545	peptidyl-proline 4-dioxygenase activity	molecular_function	8	1	519	3	18011	0.0839846
GO:0008184	glycogen phosphorylase activity	molecular_function	8	1	519	3	18011	0.0839846
GO:0003985	acetyl-CoA C-acetyltransferase activity	molecular_function	9	1	519	3	18011	0.0839846
GO:0051373	FATZ binding	molecular_function	6	1	519	3	18011	0.0839846
GO:0045851	pH reduction	biological_process	11	1	519	3	18011	0.0839846
GO:0036057	slit diaphragm	cellular_component	6	1	519	3	18011	0.0839846
GO:0042249	establishment of planar polarity of embryonic epithelium	biological_process	7	1	519	3	18011	0.0839846
GO:0071315	cellular response to morphine	biological_process	7	1	519	3	18011	0.0839846
GO:0001714	endodermal cell fate specification	biological_process	6	1	519	3	18011	0.0839846
GO:1900106	positive regulation of hyaluranon cable assembly	biological_process	7	1	519	3	18011	0.0839846
GO:0102499	SHG alpha-glucan phosphorylase activity	molecular_function	7	1	519	3	18011	0.0839846
GO:2001013	epithelial cell proliferation involved in renal tubule morphogenesis	biological_process	5	1	519	3	18011	0.0839846
GO:0002408	myeloid dendritic cell chemotaxis	biological_process	7	1	519	3	18011	0.0839846
GO:0043268	positive regulation of potassium ion transport	biological_process	10	1	519	3	18011	0.0839846
GO:0030229	very-low-density lipoprotein particle receptor activity	molecular_function	5	1	519	3	18011	0.0839846
GO:0034140	negative regulation of toll-like receptor 3 signaling pathway	biological_process	8	1	519	3	18011	0.0839846
GO:0070293	renal absorption	biological_process	6	1	519	3	18011	0.0839846
GO:0015141	succinate transmembrane transporter activity	molecular_function	9	1	519	3	18011	0.0839846
GO:0004999	vasoactive intestinal polypeptide receptor activity	molecular_function	7	1	519	3	18011	0.0839846
GO:0060378	regulation of brood size	biological_process	5	1	519	3	18011	0.0839846
GO:0034755	iron ion transmembrane transport	biological_process	11	1	519	3	18011	0.0839846
GO:0032425	positive regulation of mismatch repair	biological_process	11	1	519	3	18011	0.0839846
GO:0021903	rostrocaudal neural tube patterning	biological_process	7	1	519	3	18011	0.0839846
GO:0032400	melanosome localization	biological_process	8	1	519	3	18011	0.0839846
GO:0061181	regulation of chondrocyte development	biological_process	8	1	519	3	18011	0.0839846
GO:1902373	negative regulation of mRNA catabolic process	biological_process	9	1	519	3	18011	0.0839846
GO:0060913	cardiac cell fate determination	biological_process	6	1	519	3	18011	0.0839846
GO:0004645	phosphorylase activity	molecular_function	7	1	519	3	18011	0.0839846
GO:2000253	positive regulation of feeding behavior	biological_process	7	1	519	3	18011	0.0839846
GO:0102250	linear malto-oligosaccharide phosphorylase activity	molecular_function	7	1	519	3	18011	0.0839846
GO:0097598	sperm cytoplasmic droplet	cellular_component	5	1	519	3	18011	0.0839846
GO:0003274	endocardial cushion fusion	biological_process	6	1	519	3	18011	0.0839846
GO:1901509	regulation of endothelial tube morphogenesis	biological_process	8	1	519	3	18011	0.0839846
GO:0071691	cardiac muscle thin filament assembly	biological_process	7	1	519	3	18011	0.0839846
GO:0050688	regulation of defense response to virus	biological_process	7	1	519	3	18011	0.0839846
GO:0009115	xanthine catabolic process	biological_process	11	1	519	3	18011	0.0839846
GO:1903765	negative regulation of potassium ion export across plasma membrane	biological_process	12	1	519	3	18011	0.0839846
GO:0032053	ciliary basal body organization	biological_process	6	1	519	3	18011	0.0839846
GO:0051255	spindle midzone assembly	biological_process	5	1	519	3	18011	0.0839846
GO:0048793	pronephros development	biological_process	7	1	519	3	18011	0.0839846
GO:0086089	voltage-gated potassium channel activity involved in atrial cardiac muscle cell action potential repolarization	molecular_function	11	1	519	3	18011	0.0839846
GO:0070093	negative regulation of glucagon secretion	biological_process	11	1	519	3	18011	0.0839846
GO:1905244	regulation of modification of synaptic structure	biological_process	8	1	519	3	18011	0.0839846
GO:0072095	regulation of branch elongation involved in ureteric bud branching	biological_process	7	1	519	3	18011	0.0839846
GO:0060157	urinary bladder development	biological_process	6	1	519	3	18011	0.0839846
GO:0048525	negative regulation of viral process	biological_process	7	1	519	3	18011	0.0839846
GO:0070857	regulation of bile acid biosynthetic process	biological_process	8	1	519	3	18011	0.0839846
GO:0035502	metanephric part of ureteric bud development	biological_process	6	1	519	3	18011	0.0839846
GO:1900158	negative regulation of bone mineralization involved in bone maturation	biological_process	9	1	519	3	18011	0.0839846
GO:0050912	detection of chemical stimulus involved in sensory perception of taste	biological_process	7	1	519	3	18011	0.0839846
GO:0090461	glutamate homeostasis	biological_process	10	1	519	3	18011	0.0839846
GO:0099576	regulation of protein catabolic process at postsynapse, modulating synaptic transmission	biological_process	8	1	519	3	18011	0.0839846
GO:0060675	ureteric bud morphogenesis	biological_process	11	1	519	3	18011	0.0839846
GO:0010716	negative regulation of extracellular matrix disassembly	biological_process	9	1	519	3	18011	0.0839846
GO:0004854	xanthine dehydrogenase activity	molecular_function	7	1	519	3	18011	0.0839846
GO:0099171	presynaptic modulation of chemical synaptic transmission	biological_process	9	1	519	3	18011	0.0839846
GO:0032095	regulation of response to food	biological_process	9	1	519	3	18011	0.0839846
GO:1903070	negative regulation of ER-associated ubiquitin-dependent protein catabolic process	biological_process	13	1	519	3	18011	0.0839846
GO:0030888	regulation of B cell proliferation	biological_process	10	1	519	3	18011	0.0839846
GO:0098914	membrane repolarization during atrial cardiac muscle cell action potential	biological_process	11	1	519	3	18011	0.0839846
GO:0036315	cellular response to sterol	biological_process	8	1	519	3	18011	0.0839846
GO:0015137	citrate transmembrane transporter activity	molecular_function	8	1	519	3	18011	0.0839846
GO:0021502	neural fold elevation formation	biological_process	5	1	519	3	18011	0.0839846
GO:0015936	coenzyme A metabolic process	biological_process	7	1	519	3	18011	0.0839846
GO:0014012	peripheral nervous system axon regeneration	biological_process	8	1	519	3	18011	0.0839846
GO:0051902	negative regulation of mitochondrial depolarization	biological_process	8	1	519	3	18011	0.0839846
GO:0070831	basement membrane assembly	biological_process	6	1	519	3	18011	0.0839846
GO:1900625	positive regulation of monocyte aggregation	biological_process	9	1	519	3	18011	0.0839846
GO:0001826	inner cell mass cell differentiation	biological_process	6	1	519	3	18011	0.0839846
GO:0071731	response to nitric oxide	biological_process	7	1	519	3	18011	0.0839846
GO:0019828	aspartic-type endopeptidase inhibitor activity	molecular_function	8	1	519	3	18011	0.0839846
GO:0051152	positive regulation of smooth muscle cell differentiation	biological_process	9	1	519	3	18011	0.0839846
GO:0043043	peptide biosynthetic process	biological_process	8	1	519	3	18011	0.0839846
GO:1903899	positive regulation of PERK-mediated unfolded protein response	biological_process	10	1	519	3	18011	0.0839846
GO:0071603	endothelial cell-cell adhesion	biological_process	7	1	519	3	18011	0.0839846
GO:0048101	calcium- and calmodulin-regulated 3',5'-cyclic-GMP phosphodiesterase activity	molecular_function	11	1	519	3	18011	0.0839846
GO:0045351	type I interferon biosynthetic process	biological_process	8	1	519	3	18011	0.0839846
GO:0015321	sodium-dependent phosphate transmembrane transporter activity	molecular_function	9	1	519	3	18011	0.0839846
GO:0072531	pyrimidine-containing compound transmembrane transport	biological_process	7	1	519	3	18011	0.0839846
GO:0004705	JUN kinase activity	molecular_function	11	1	519	3	18011	0.0839846
GO:0070634	transepithelial ammonium transport	biological_process	9	1	519	3	18011	0.0839846
GO:0001161	intronic transcription regulatory region sequence-specific DNA binding	molecular_function	9	1	519	3	18011	0.0839846
GO:0017153	sodium:dicarboxylate symporter activity	molecular_function	8	1	519	3	18011	0.0839846
GO:0031503	protein-containing complex localization	biological_process	6	1	519	3	18011	0.0839846
GO:0048248	CXCR3 chemokine receptor binding	molecular_function	9	1	519	3	18011	0.0839846
GO:0006635	fatty acid beta-oxidation	biological_process	11	3	519	36	18011	0.0843966
GO:0046914	transition metal ion binding	molecular_function	7	2	519	17	18011	0.0847752
GO:0048738	cardiac muscle tissue development	biological_process	8	2	519	17	18011	0.0847752
GO:0046329	negative regulation of JNK cascade	biological_process	13	2	519	17	18011	0.0847752
GO:0007276	gamete generation	biological_process	5	2	519	17	18011	0.0847752
GO:1904707	positive regulation of vascular smooth muscle cell proliferation	biological_process	9	2	519	17	18011	0.0847752
GO:0006508	proteolysis	biological_process	7	20	519	499	18011	0.0869226
GO:0005615	extracellular space	cellular_component	4	33	519	895	18011	0.0879361
GO:0004888	transmembrane signaling receptor activity	molecular_function	5	8	519	160	18011	0.0919743
GO:0004435	phosphatidylinositol phospholipase C activity	molecular_function	9	2	519	18	18011	0.0936143
GO:0002009	morphogenesis of an epithelium	biological_process	6	2	519	18	18011	0.0936143
GO:0070584	mitochondrion morphogenesis	biological_process	7	2	519	18	18011	0.0936143
GO:0030992	intraciliary transport particle B	cellular_component	4	2	519	18	18011	0.0936143
GO:0001954	positive regulation of cell-matrix adhesion	biological_process	8	2	519	18	18011	0.0936143
GO:0006814	sodium ion transport	biological_process	9	4	519	61	18011	0.0988235
GO:0045600	positive regulation of fat cell differentiation	biological_process	8	3	519	39	18011	0.101559
GO:0007596	blood coagulation	biological_process	7	3	519	39	18011	0.101559
GO:0006885	regulation of pH	biological_process	10	2	519	19	18011	0.102704
GO:0030902	hindbrain development	biological_process	5	2	519	19	18011	0.102704
GO:0005540	hyaluronic acid binding	molecular_function	6	2	519	19	18011	0.102704
GO:0009880	embryonic pattern specification	biological_process	5	2	519	19	18011	0.102704
GO:0035774	positive regulation of insulin secretion involved in cellular response to glucose stimulus	biological_process	12	2	519	19	18011	0.102704
GO:0003674	molecular_function	molecular_function	2	2	519	19	18011	0.102704
GO:0010906	regulation of glucose metabolic process	biological_process	9	2	519	19	18011	0.102704
GO:0072332	intrinsic apoptotic signaling pathway by p53 class mediator	biological_process	7	2	519	19	18011	0.102704
GO:0043296	apical junction complex	cellular_component	5	2	519	19	18011	0.102704
GO:0042995	cell projection	cellular_component	4	4	519	62	18011	0.103371
GO:0015629	actin cytoskeleton	cellular_component	7	8	519	165	18011	0.104959
GO:0005254	chloride channel activity	molecular_function	8	3	519	40	18011	0.107566
GO:0030139	endocytic vesicle	cellular_component	7	3	519	40	18011	0.107566
GO:0005249	voltage-gated potassium channel activity	molecular_function	9	4	519	63	18011	0.108012
GO:0004771	sterol esterase activity	molecular_function	7	1	519	4	18011	0.110385
GO:0098868	bone growth	biological_process	5	1	519	4	18011	0.110385
GO:0006817	phosphate ion transport	biological_process	9	1	519	4	18011	0.110385
GO:0001940	male pronucleus	cellular_component	8	1	519	4	18011	0.110385
GO:0003272	endocardial cushion formation	biological_process	5	1	519	4	18011	0.110385
GO:0008238	exopeptidase activity	molecular_function	7	1	519	4	18011	0.110385
GO:0016560	protein import into peroxisome matrix, docking	biological_process	6	1	519	4	18011	0.110385
GO:0060438	trachea development	biological_process	6	1	519	4	18011	0.110385
GO:0003400	regulation of COPII vesicle coating	biological_process	8	1	519	4	18011	0.110385
GO:0097449	astrocyte projection	cellular_component	7	1	519	4	18011	0.110385
GO:0014910	regulation of smooth muscle cell migration	biological_process	8	1	519	4	18011	0.110385
GO:0042567	insulin-like growth factor ternary complex	cellular_component	6	1	519	4	18011	0.110385
GO:0060214	endocardium formation	biological_process	5	1	519	4	18011	0.110385
GO:0006857	oligopeptide transport	biological_process	9	1	519	4	18011	0.110385
GO:0032534	regulation of microvillus assembly	biological_process	10	1	519	4	18011	0.110385
GO:1990226	histone methyltransferase binding	molecular_function	6	1	519	4	18011	0.110385
GO:0003828	alpha-N-acetylneuraminate alpha-2,8-sialyltransferase activity	molecular_function	7	1	519	4	18011	0.110385
GO:1903061	positive regulation of protein lipidation	biological_process	9	1	519	4	18011	0.110385
GO:0050691	regulation of defense response to virus by host	biological_process	8	1	519	4	18011	0.110385
GO:0010828	positive regulation of glucose transmembrane transport	biological_process	9	1	519	4	18011	0.110385
GO:0014009	glial cell proliferation	biological_process	4	1	519	4	18011	0.110385
GO:0060075	regulation of resting membrane potential	biological_process	6	1	519	4	18011	0.110385
GO:0000126	transcription factor TFIIIB complex	cellular_component	7	1	519	4	18011	0.110385
GO:0060512	prostate gland morphogenesis	biological_process	5	1	519	4	18011	0.110385
GO:0015245	fatty acid transmembrane transporter activity	molecular_function	5	1	519	4	18011	0.110385
GO:0098712	L-glutamate import across plasma membrane	biological_process	7	1	519	4	18011	0.110385
GO:0015467	G-protein activated inward rectifier potassium channel activity	molecular_function	11	1	519	4	18011	0.110385
GO:0046321	positive regulation of fatty acid oxidation	biological_process	10	1	519	4	18011	0.110385
GO:1900020	positive regulation of protein kinase C activity	biological_process	13	1	519	4	18011	0.110385
GO:0009597	detection of virus	biological_process	8	1	519	4	18011	0.110385
GO:0015057	thrombin-activated receptor activity	molecular_function	7	1	519	4	18011	0.110385
GO:0034705	potassium channel complex	cellular_component	8	1	519	4	18011	0.110385
GO:0007028	cytoplasm organization	biological_process	5	1	519	4	18011	0.110385
GO:0030375	thyroid hormone receptor coactivator activity	molecular_function	7	1	519	4	18011	0.110385
GO:0035089	establishment of apical/basal cell polarity	biological_process	7	1	519	4	18011	0.110385
GO:0042662	negative regulation of mesodermal cell fate specification	biological_process	10	1	519	4	18011	0.110385
GO:0008527	taste receptor activity	molecular_function	6	1	519	4	18011	0.110385
GO:0033625	positive regulation of integrin activation	biological_process	8	1	519	4	18011	0.110385
GO:0038162	erythropoietin-mediated signaling pathway	biological_process	7	1	519	4	18011	0.110385
GO:0098883	synapse pruning	biological_process	6	1	519	4	18011	0.110385
GO:0035330	regulation of hippo signaling	biological_process	9	1	519	4	18011	0.110385
GO:0050869	negative regulation of B cell activation	biological_process	9	1	519	4	18011	0.110385
GO:1903208	negative regulation of hydrogen peroxide-induced neuron death	biological_process	10	1	519	4	18011	0.110385
GO:0014816	skeletal muscle satellite cell differentiation	biological_process	7	1	519	4	18011	0.110385
GO:1902732	positive regulation of chondrocyte proliferation	biological_process	8	1	519	4	18011	0.110385
GO:1905516	positive regulation of fertilization	biological_process	7	1	519	4	18011	0.110385
GO:0002159	desmosome assembly	biological_process	8	1	519	4	18011	0.110385
GO:1901018	positive regulation of potassium ion transmembrane transporter activity	biological_process	8	1	519	4	18011	0.110385
GO:0033634	positive regulation of cell-cell adhesion mediated by integrin	biological_process	8	1	519	4	18011	0.110385
GO:0032488	Cdc42 protein signal transduction	biological_process	9	1	519	4	18011	0.110385
GO:0086016	AV node cell action potential	biological_process	8	1	519	4	18011	0.110385
GO:0071376	cellular response to corticotropin-releasing hormone stimulus	biological_process	8	1	519	4	18011	0.110385
GO:0030021	extracellular matrix structural constituent conferring compression resistance	molecular_function	5	1	519	4	18011	0.110385
GO:0032273	positive regulation of protein polymerization	biological_process	8	1	519	4	18011	0.110385
GO:0046923	ER retention sequence binding	molecular_function	7	1	519	4	18011	0.110385
GO:0014909	smooth muscle cell migration	biological_process	8	1	519	4	18011	0.110385
GO:0060267	positive regulation of respiratory burst	biological_process	7	1	519	4	18011	0.110385
GO:0035726	common myeloid progenitor cell proliferation	biological_process	4	1	519	4	18011	0.110385
GO:0032914	positive regulation of transforming growth factor beta1 production	biological_process	9	1	519	4	18011	0.110385
GO:0042731	PH domain binding	molecular_function	6	1	519	4	18011	0.110385
GO:0000015	phosphopyruvate hydratase complex	cellular_component	7	1	519	4	18011	0.110385
GO:0032649	regulation of interferon-gamma production	biological_process	7	1	519	4	18011	0.110385
GO:0060091	kinocilium	cellular_component	6	1	519	4	18011	0.110385
GO:0060005	vestibular reflex	biological_process	6	1	519	4	18011	0.110385
GO:1904823	purine nucleobase transmembrane transport	biological_process	9	1	519	4	18011	0.110385
GO:0060393	regulation of pathway-restricted SMAD protein phosphorylation	biological_process	10	1	519	4	18011	0.110385
GO:0015840	urea transport	biological_process	8	1	519	4	18011	0.110385
GO:0019787	ubiquitin-like protein transferase activity	molecular_function	5	1	519	4	18011	0.110385
GO:0010513	positive regulation of phosphatidylinositol biosynthetic process	biological_process	10	1	519	4	18011	0.110385
GO:1904447	folate import across plasma membrane	biological_process	8	1	519	4	18011	0.110385
GO:1902259	regulation of delayed rectifier potassium channel activity	biological_process	9	1	519	4	18011	0.110385
GO:0060385	axonogenesis involved in innervation	biological_process	10	1	519	4	18011	0.110385
GO:0002227	innate immune response in mucosa	biological_process	7	1	519	4	18011	0.110385
GO:0072164	mesonephric tubule development	biological_process	6	1	519	4	18011	0.110385
GO:0004792	thiosulfate sulfurtransferase activity	molecular_function	7	1	519	4	18011	0.110385
GO:0097200	cysteine-type endopeptidase activity involved in execution phase of apoptosis	molecular_function	10	1	519	4	18011	0.110385
GO:0016576	histone dephosphorylation	biological_process	10	1	519	4	18011	0.110385
GO:0000103	sulfate assimilation	biological_process	6	1	519	4	18011	0.110385
GO:0072540	T-helper 17 cell lineage commitment	biological_process	10	1	519	4	18011	0.110385
GO:0035723	interleukin-15-mediated signaling pathway	biological_process	7	1	519	4	18011	0.110385
GO:0086006	voltage-gated sodium channel activity involved in cardiac muscle cell action potential	molecular_function	10	1	519	4	18011	0.110385
GO:0007258	JUN phosphorylation	biological_process	10	1	519	4	18011	0.110385
GO:0030049	muscle filament sliding	biological_process	8	1	519	4	18011	0.110385
GO:0005176	ErbB-2 class receptor binding	molecular_function	6	1	519	4	18011	0.110385
GO:0004096	catalase activity	molecular_function	5	1	519	4	18011	0.110385
GO:0003091	renal water homeostasis	biological_process	6	1	519	4	18011	0.110385
GO:0046581	intercellular canaliculus	cellular_component	5	1	519	4	18011	0.110385
GO:0050702	interleukin-1 beta secretion	biological_process	13	1	519	4	18011	0.110385
GO:0004634	phosphopyruvate hydratase activity	molecular_function	7	1	519	4	18011	0.110385
GO:0001032	RNA polymerase III type 3 promoter DNA binding	molecular_function	9	1	519	4	18011	0.110385
GO:0070695	FHF complex	cellular_component	4	1	519	4	18011	0.110385
GO:0060336	negative regulation of interferon-gamma-mediated signaling pathway	biological_process	10	1	519	4	18011	0.110385
GO:2001259	positive regulation of cation channel activity	biological_process	8	1	519	4	18011	0.110385
GO:0030035	microspike assembly	biological_process	8	1	519	4	18011	0.110385
GO:0051546	keratinocyte migration	biological_process	9	1	519	4	18011	0.110385
GO:0061689	tricellular tight junction	cellular_component	6	1	519	4	18011	0.110385
GO:0060686	negative regulation of prostatic bud formation	biological_process	9	1	519	4	18011	0.110385
GO:2001137	positive regulation of endocytic recycling	biological_process	9	1	519	4	18011	0.110385
GO:0034165	positive regulation of toll-like receptor 9 signaling pathway	biological_process	10	1	519	4	18011	0.110385
GO:0070252	actin-mediated cell contraction	biological_process	6	1	519	4	18011	0.110385
GO:1904717	regulation of AMPA glutamate receptor clustering	biological_process	9	1	519	4	18011	0.110385
GO:2000503	positive regulation of natural killer cell chemotaxis	biological_process	10	1	519	4	18011	0.110385
GO:0051223	regulation of protein transport	biological_process	8	1	519	4	18011	0.110385
GO:2000343	positive regulation of chemokine (C-X-C motif) ligand 2 production	biological_process	9	1	519	4	18011	0.110385
GO:2000048	negative regulation of cell-cell adhesion mediated by cadherin	biological_process	8	1	519	4	18011	0.110385
GO:0072643	interferon-gamma secretion	biological_process	12	1	519	4	18011	0.110385
GO:0006670	sphingosine metabolic process	biological_process	8	1	519	4	18011	0.110385
GO:0048105	establishment of body hair planar orientation	biological_process	8	1	519	4	18011	0.110385
GO:0038039	G protein-coupled receptor heterodimeric complex	cellular_component	8	1	519	4	18011	0.110385
GO:1900454	positive regulation of long-term synaptic depression	biological_process	6	1	519	4	18011	0.110385
GO:0016024	CDP-diacylglycerol biosynthetic process	biological_process	11	1	519	4	18011	0.110385
GO:1903003	positive regulation of protein deubiquitination	biological_process	10	1	519	4	18011	0.110385
GO:0030060	L-malate dehydrogenase activity	molecular_function	7	1	519	4	18011	0.110385
GO:0006220	pyrimidine nucleotide metabolic process	biological_process	9	1	519	4	18011	0.110385
GO:0050833	pyruvate transmembrane transporter activity	molecular_function	8	1	519	4	18011	0.110385
GO:0010454	negative regulation of cell fate commitment	biological_process	8	1	519	4	18011	0.110385
GO:2000117	negative regulation of cysteine-type endopeptidase activity	biological_process	12	1	519	4	18011	0.110385
GO:0051454	intracellular pH elevation	biological_process	12	1	519	4	18011	0.110385
GO:0008373	sialyltransferase activity	molecular_function	6	2	519	20	18011	0.112024
GO:0005575	cellular_component	cellular_component	2	2	519	20	18011	0.112024
GO:0001158	enhancer sequence-specific DNA binding	molecular_function	9	2	519	20	18011	0.112024
GO:0097503	sialylation	biological_process	7	2	519	20	18011	0.112024
GO:0008378	galactosyltransferase activity	molecular_function	7	2	519	20	18011	0.112024
GO:0045095	keratin filament	cellular_component	8	4	519	64	18011	0.112745
GO:0010466	negative regulation of peptidase activity	biological_process	10	3	519	41	18011	0.113707
GO:0030414	peptidase inhibitor activity	molecular_function	6	3	519	41	18011	0.113707
GO:0006633	fatty acid biosynthetic process	biological_process	10	3	519	41	18011	0.113707
GO:0043621	protein self-association	molecular_function	5	3	519	41	18011	0.113707
GO:0045121	membrane raft	cellular_component	6	6	519	115	18011	0.115122
GO:0071805	potassium ion transmembrane transport	biological_process	10	6	519	115	18011	0.115122
GO:0034765	regulation of ion transmembrane transport	biological_process	8	5	519	90	18011	0.11822
GO:0051209	release of sequestered calcium ion into cytosol	biological_process	8	3	519	42	18011	0.119978
GO:0009190	cyclic nucleotide biosynthetic process	biological_process	10	2	519	21	18011	0.121552
GO:0050900	leukocyte migration	biological_process	4	2	519	21	18011	0.121552
GO:0032728	positive regulation of interferon-beta production	biological_process	9	2	519	21	18011	0.121552
GO:0032588	trans-Golgi network membrane	cellular_component	8	2	519	21	18011	0.121552
GO:1990830	cellular response to leukemia inhibitory factor	biological_process	8	5	519	91	18011	0.122323
GO:0098869	cellular oxidant detoxification	biological_process	5	4	519	66	18011	0.122481
GO:0048471	perinuclear region of cytoplasm	cellular_component	6	14	519	345	18011	0.125956
GO:0001947	heart looping	biological_process	7	3	519	43	18011	0.126373
GO:0030199	collagen fibril organization	biological_process	7	3	519	43	18011	0.126373
GO:0005267	potassium channel activity	molecular_function	8	4	519	67	18011	0.127479
GO:0098609	cell-cell adhesion	biological_process	5	5	519	93	18011	0.130726
GO:0005070	SH3/SH2 adaptor activity	molecular_function	7	2	519	22	18011	0.131269
GO:0008150	biological_process	biological_process	2	2	519	22	18011	0.131269
GO:0061512	protein localization to cilium	biological_process	8	2	519	22	18011	0.131269
GO:0010800	positive regulation of peptidyl-threonine phosphorylation	biological_process	11	2	519	22	18011	0.131269
GO:0043542	endothelial cell migration	biological_process	9	2	519	22	18011	0.131269
GO:0009925	basal plasma membrane	cellular_component	5	2	519	22	18011	0.131269
GO:0016747	transferase activity, transferring acyl groups other than amino-acyl groups	molecular_function	6	2	519	22	18011	0.131269
GO:0045662	negative regulation of myoblast differentiation	biological_process	8	2	519	22	18011	0.131269
GO:0003148	outflow tract septum morphogenesis	biological_process	6	2	519	22	18011	0.131269
GO:0005901	caveola	cellular_component	8	3	519	44	18011	0.132888
GO:0001725	stress fiber	cellular_component	7	3	519	44	18011	0.132888
GO:0005244	voltage-gated ion channel activity	molecular_function	9	5	519	94	18011	0.135022
GO:0006486	protein glycosylation	biological_process	9	5	519	94	18011	0.135022
GO:0010830	regulation of myotube differentiation	biological_process	9	1	519	5	18011	0.136025
GO:0070100	negative regulation of chemokine-mediated signaling pathway	biological_process	10	1	519	5	18011	0.136025
GO:0045545	syndecan binding	molecular_function	6	1	519	5	18011	0.136025
GO:0001561	fatty acid alpha-oxidation	biological_process	11	1	519	5	18011	0.136025
GO:0001758	retinal dehydrogenase activity	molecular_function	7	1	519	5	18011	0.136025
GO:0060485	mesenchyme development	biological_process	6	1	519	5	18011	0.136025
GO:0004090	carbonyl reductase (NADPH) activity	molecular_function	7	1	519	5	18011	0.136025
GO:0006032	chitin catabolic process	biological_process	8	1	519	5	18011	0.136025
GO:0021957	corticospinal tract morphogenesis	biological_process	12	1	519	5	18011	0.136025
GO:0021889	olfactory bulb interneuron differentiation	biological_process	9	1	519	5	18011	0.136025
GO:0072345	NAADP-sensitive calcium-release channel activity	molecular_function	10	1	519	5	18011	0.136025
GO:0061384	heart trabecula morphogenesis	biological_process	6	1	519	5	18011	0.136025
GO:0071870	cellular response to catecholamine stimulus	biological_process	8	1	519	5	18011	0.136025
GO:0048096	chromatin-mediated maintenance of transcription	biological_process	7	1	519	5	18011	0.136025
GO:0014706	striated muscle tissue development	biological_process	7	1	519	5	18011	0.136025
GO:1902414	protein localization to cell junction	biological_process	6	1	519	5	18011	0.136025
GO:0048752	semicircular canal morphogenesis	biological_process	6	1	519	5	18011	0.136025
GO:0008519	ammonium transmembrane transporter activity	molecular_function	7	1	519	5	18011	0.136025
GO:0071438	invadopodium membrane	cellular_component	6	1	519	5	18011	0.136025
GO:0035694	mitochondrial protein catabolic process	biological_process	9	1	519	5	18011	0.136025
GO:0061458	reproductive system development	biological_process	6	1	519	5	18011	0.136025
GO:0002934	desmosome organization	biological_process	7	1	519	5	18011	0.136025
GO:0097755	positive regulation of blood vessel diameter	biological_process	9	1	519	5	18011	0.136025
GO:0031665	negative regulation of lipopolysaccharide-mediated signaling pathway	biological_process	8	1	519	5	18011	0.136025
GO:0034103	regulation of tissue remodeling	biological_process	6	1	519	5	18011	0.136025
GO:0150094	amyloid-beta clearance by cellular catabolic process	biological_process	6	1	519	5	18011	0.136025
GO:0045217	cell-cell junction maintenance	biological_process	7	1	519	5	18011	0.136025
GO:0035549	positive regulation of interferon-beta secretion	biological_process	10	1	519	5	18011	0.136025
GO:0004528	phosphodiesterase I activity	molecular_function	8	1	519	5	18011	0.136025
GO:0033555	multicellular organismal response to stress	biological_process	5	1	519	5	18011	0.136025
GO:0032819	positive regulation of natural killer cell proliferation	biological_process	10	1	519	5	18011	0.136025
GO:0060706	cell differentiation involved in embryonic placenta development	biological_process	5	1	519	5	18011	0.136025
GO:0005004	GPI-linked ephrin receptor activity	molecular_function	11	1	519	5	18011	0.136025
GO:0003988	acetyl-CoA C-acyltransferase activity	molecular_function	8	1	519	5	18011	0.136025
GO:0044320	cellular response to leptin stimulus	biological_process	7	1	519	5	18011	0.136025
GO:0046822	regulation of nucleocytoplasmic transport	biological_process	8	1	519	5	18011	0.136025
GO:0072341	modified amino acid binding	molecular_function	4	1	519	5	18011	0.136025
GO:0045110	intermediate filament bundle assembly	biological_process	6	1	519	5	18011	0.136025
GO:0070915	lysophosphatidic acid receptor activity	molecular_function	8	1	519	5	18011	0.136025
GO:0061088	regulation of sequestering of zinc ion	biological_process	6	1	519	5	18011	0.136025
GO:2000035	regulation of stem cell division	biological_process	7	1	519	5	18011	0.136025
GO:0008532	N-acetyllactosaminide beta-1,3-N-acetylglucosaminyltransferase activity	molecular_function	8	1	519	5	18011	0.136025
GO:0001520	outer dense fiber	cellular_component	5	1	519	5	18011	0.136025
GO:0036414	histone citrullination	biological_process	10	1	519	5	18011	0.136025
GO:0060666	dichotomous subdivision of terminal units involved in salivary gland branching	biological_process	8	1	519	5	18011	0.136025
GO:0042118	endothelial cell activation	biological_process	5	1	519	5	18011	0.136025
GO:0015696	ammonium transport	biological_process	8	1	519	5	18011	0.136025
GO:1990254	keratin filament binding	molecular_function	6	1	519	5	18011	0.136025
GO:0032268	regulation of cellular protein metabolic process	biological_process	7	1	519	5	18011	0.136025
GO:0021871	forebrain regionalization	biological_process	6	1	519	5	18011	0.136025
GO:0006734	NADH metabolic process	biological_process	4	1	519	5	18011	0.136025
GO:0071651	positive regulation of chemokine (C-C motif) ligand 5 production	biological_process	9	1	519	5	18011	0.136025
GO:0017171	serine hydrolase activity	molecular_function	5	1	519	5	18011	0.136025
GO:0002735	positive regulation of myeloid dendritic cell cytokine production	biological_process	10	1	519	5	18011	0.136025
GO:0080135	regulation of cellular response to stress	biological_process	6	1	519	5	18011	0.136025
GO:0043367	CD4-positive, alpha-beta T cell differentiation	biological_process	10	1	519	5	18011	0.136025
GO:0002819	regulation of adaptive immune response	biological_process	7	1	519	5	18011	0.136025
GO:0016615	malate dehydrogenase activity	molecular_function	6	1	519	5	18011	0.136025
GO:0086012	membrane depolarization during cardiac muscle cell action potential	biological_process	8	1	519	5	18011	0.136025
GO:0050927	positive regulation of positive chemotaxis	biological_process	9	1	519	5	18011	0.136025
GO:0043462	regulation of ATPase activity	biological_process	7	1	519	5	18011	0.136025
GO:1990075	periciliary membrane compartment	cellular_component	5	1	519	5	18011	0.136025
GO:0072177	mesonephric duct development	biological_process	7	1	519	5	18011	0.136025
GO:0004568	chitinase activity	molecular_function	7	1	519	5	18011	0.136025
GO:0060956	endocardial cell differentiation	biological_process	8	1	519	5	18011	0.136025
GO:0043267	negative regulation of potassium ion transport	biological_process	10	1	519	5	18011	0.136025
GO:0071421	manganese ion transmembrane transport	biological_process	11	1	519	5	18011	0.136025
GO:0042760	very long-chain fatty acid catabolic process	biological_process	11	1	519	5	18011	0.136025
GO:0030274	LIM domain binding	molecular_function	6	1	519	5	18011	0.136025
GO:0002821	positive regulation of adaptive immune response	biological_process	8	1	519	5	18011	0.136025
GO:0005826	actomyosin contractile ring	cellular_component	5	1	519	5	18011	0.136025
GO:0006085	acetyl-CoA biosynthetic process	biological_process	9	1	519	5	18011	0.136025
GO:0071639	positive regulation of monocyte chemotactic protein-1 production	biological_process	9	1	519	5	18011	0.136025
GO:0001653	peptide receptor activity	molecular_function	5	1	519	5	18011	0.136025
GO:0032783	ELL-EAF complex	cellular_component	5	1	519	5	18011	0.136025
GO:0045839	negative regulation of mitotic nuclear division	biological_process	9	1	519	5	18011	0.136025
GO:0072488	ammonium transmembrane transport	biological_process	9	1	519	5	18011	0.136025
GO:0071681	cellular response to indole-3-methanol	biological_process	7	1	519	5	18011	0.136025
GO:0035239	tube morphogenesis	biological_process	5	1	519	5	18011	0.136025
GO:0043651	linoleic acid metabolic process	biological_process	11	1	519	5	18011	0.136025
GO:0035634	response to stilbenoid	biological_process	7	1	519	5	18011	0.136025
GO:1901029	negative regulation of mitochondrial outer membrane permeabilization involved in apoptotic signaling pathway	biological_process	10	1	519	5	18011	0.136025
GO:0072178	nephric duct morphogenesis	biological_process	8	1	519	5	18011	0.136025
GO:1904491	protein localization to ciliary transition zone	biological_process	9	1	519	5	18011	0.136025
GO:0099562	maintenance of postsynaptic density structure	biological_process	9	1	519	5	18011	0.136025
GO:0033503	HULC complex	cellular_component	6	1	519	5	18011	0.136025
GO:0001939	female pronucleus	cellular_component	8	1	519	5	18011	0.136025
GO:1900028	negative regulation of ruffle assembly	biological_process	10	1	519	5	18011	0.136025
GO:1901017	negative regulation of potassium ion transmembrane transporter activity	biological_process	8	1	519	5	18011	0.136025
GO:0033085	negative regulation of T cell differentiation in thymus	biological_process	11	1	519	5	18011	0.136025
GO:0034340	response to type I interferon	biological_process	7	1	519	5	18011	0.136025
GO:0035673	oligopeptide transmembrane transporter activity	molecular_function	7	1	519	5	18011	0.136025
GO:1901030	positive regulation of mitochondrial outer membrane permeabilization involved in apoptotic signaling pathway	biological_process	10	1	519	5	18011	0.136025
GO:0045617	negative regulation of keratinocyte differentiation	biological_process	10	1	519	5	18011	0.136025
GO:0006544	glycine metabolic process	biological_process	11	1	519	5	18011	0.136025
GO:0050839	cell adhesion molecule binding	molecular_function	5	3	519	45	18011	0.139516
GO:0005778	peroxisomal membrane	cellular_component	8	2	519	23	18011	0.141156
GO:0031526	brush border membrane	cellular_component	6	2	519	23	18011	0.141156
GO:0031032	actomyosin structure organization	biological_process	8	2	519	23	18011	0.141156
GO:0048754	branching morphogenesis of an epithelial tube	biological_process	6	2	519	23	18011	0.141156
GO:0016849	phosphorus-oxygen lyase activity	molecular_function	5	2	519	23	18011	0.141156
GO:0005261	cation channel activity	molecular_function	7	2	519	23	18011	0.141156
GO:0005506	iron ion binding	molecular_function	8	7	519	150	18011	0.143057
GO:0005975	carbohydrate metabolic process	biological_process	5	7	519	151	18011	0.146556
GO:0008092	cytoskeletal protein binding	molecular_function	5	4	519	71	18011	0.148291
GO:0051087	chaperone binding	molecular_function	5	4	519	71	18011	0.148291
GO:0000187	activation of MAPK activity	biological_process	13	4	519	71	18011	0.148291
GO:0003779	actin binding	molecular_function	6	11	519	267	18011	0.150236
GO:0007492	endoderm development	biological_process	6	2	519	24	18011	0.151195
GO:0005272	sodium channel activity	molecular_function	8	2	519	24	18011	0.151195
GO:0007369	gastrulation	biological_process	6	2	519	24	18011	0.151195
GO:0030016	myofibril	cellular_component	7	2	519	24	18011	0.151195
GO:0048568	embryonic organ development	biological_process	6	2	519	24	18011	0.151195
GO:0050769	positive regulation of neurogenesis	biological_process	9	2	519	24	18011	0.151195
GO:0016712	oxidoreductase activity, acting on paired donors, with incorporation or reduction of molecular oxygen, reduced flavin or flavoprotein as one donor, and incorporation of one atom of oxygen	molecular_function	6	2	519	24	18011	0.151195
GO:0016758	transferase activity, transferring hexosyl groups	molecular_function	6	2	519	24	18011	0.151195
GO:0048468	cell development	biological_process	5	3	519	47	18011	0.153096
GO:0034220	ion transmembrane transport	biological_process	7	7	519	153	18011	0.153675
GO:0000981	DNA-binding transcription factor activity, RNA polymerase II-specific	molecular_function	5	10	519	239	18011	0.153773
GO:0090091	positive regulation of extracellular matrix disassembly	biological_process	9	1	519	6	18011	0.160928
GO:0090277	positive regulation of peptide hormone secretion	biological_process	10	1	519	6	18011	0.160928
GO:0097186	amelogenesis	biological_process	8	1	519	6	18011	0.160928
GO:2000647	negative regulation of stem cell proliferation	biological_process	8	1	519	6	18011	0.160928
GO:0044342	type B pancreatic cell proliferation	biological_process	5	1	519	6	18011	0.160928
GO:0008635	activation of cysteine-type endopeptidase activity involved in apoptotic process by cytochrome c	biological_process	12	1	519	6	18011	0.160928
GO:0042446	hormone biosynthetic process	biological_process	5	1	519	6	18011	0.160928
GO:0046850	regulation of bone remodeling	biological_process	7	1	519	6	18011	0.160928
GO:0035672	oligopeptide transmembrane transport	biological_process	10	1	519	6	18011	0.160928
GO:0015125	bile acid transmembrane transporter activity	molecular_function	5	1	519	6	18011	0.160928
GO:0097427	microtubule bundle	cellular_component	6	1	519	6	18011	0.160928
GO:1902237	positive regulation of endoplasmic reticulum stress-induced intrinsic apoptotic signaling pathway	biological_process	9	1	519	6	18011	0.160928
GO:0070836	caveola assembly	biological_process	9	1	519	6	18011	0.160928
GO:0030311	poly-N-acetyllactosamine biosynthetic process	biological_process	8	1	519	6	18011	0.160928
GO:0060259	regulation of feeding behavior	biological_process	6	1	519	6	18011	0.160928
GO:0004396	hexokinase activity	molecular_function	7	1	519	6	18011	0.160928
GO:2000738	positive regulation of stem cell differentiation	biological_process	8	1	519	6	18011	0.160928
GO:0018101	protein citrullination	biological_process	11	1	519	6	18011	0.160928
GO:0010886	positive regulation of cholesterol storage	biological_process	7	1	519	6	18011	0.160928
GO:0042641	actomyosin	cellular_component	6	1	519	6	18011	0.160928
GO:0086011	membrane repolarization during action potential	biological_process	9	1	519	6	18011	0.160928
GO:0030856	regulation of epithelial cell differentiation	biological_process	7	1	519	6	18011	0.160928
GO:0030643	cellular phosphate ion homeostasis	biological_process	11	1	519	6	18011	0.160928
GO:0045927	positive regulation of growth	biological_process	6	1	519	6	18011	0.160928
GO:1902260	negative regulation of delayed rectifier potassium channel activity	biological_process	10	1	519	6	18011	0.160928
GO:0034372	very-low-density lipoprotein particle remodeling	biological_process	10	1	519	6	18011	0.160928
GO:0071493	cellular response to UV-B	biological_process	9	1	519	6	18011	0.160928
GO:0004565	beta-galactosidase activity	molecular_function	8	1	519	6	18011	0.160928
GO:0051346	negative regulation of hydrolase activity	biological_process	7	1	519	6	18011	0.160928
GO:0030368	interleukin-17 receptor activity	molecular_function	7	1	519	6	18011	0.160928
GO:0060982	coronary artery morphogenesis	biological_process	8	1	519	6	18011	0.160928
GO:0045794	negative regulation of cell volume	biological_process	8	1	519	6	18011	0.160928
GO:0097242	amyloid-beta clearance	biological_process	4	1	519	6	18011	0.160928
GO:0097485	neuron projection guidance	biological_process	5	1	519	6	18011	0.160928
GO:0006207	'de novo' pyrimidine nucleobase biosynthetic process	biological_process	11	1	519	6	18011	0.160928
GO:0090382	phagosome maturation	biological_process	6	1	519	6	18011	0.160928
GO:0060100	positive regulation of phagocytosis, engulfment	biological_process	9	1	519	6	18011	0.160928
GO:0055013	cardiac muscle cell development	biological_process	8	1	519	6	18011	0.160928
GO:0060687	regulation of branching involved in prostate gland morphogenesis	biological_process	8	1	519	6	18011	0.160928
GO:0010818	T cell chemotaxis	biological_process	7	1	519	6	18011	0.160928
GO:0042633	hair cycle	biological_process	5	1	519	6	18011	0.160928
GO:0000788	nuclear nucleosome	cellular_component	6	1	519	6	18011	0.160928
GO:0004340	glucokinase activity	molecular_function	8	1	519	6	18011	0.160928
GO:0051574	positive regulation of histone H3-K9 methylation	biological_process	12	1	519	6	18011	0.160928
GO:1903352	L-ornithine transmembrane transport	biological_process	8	1	519	6	18011	0.160928
GO:1900407	regulation of cellular response to oxidative stress	biological_process	7	1	519	6	18011	0.160928
GO:2000553	positive regulation of T-helper 2 cell cytokine production	biological_process	12	1	519	6	18011	0.160928
GO:0043303	mast cell degranulation	biological_process	9	1	519	6	18011	0.160928
GO:0060710	chorio-allantoic fusion	biological_process	4	1	519	6	18011	0.160928
GO:0034141	positive regulation of toll-like receptor 3 signaling pathway	biological_process	10	1	519	6	18011	0.160928
GO:0055009	atrial cardiac muscle tissue morphogenesis	biological_process	8	1	519	6	18011	0.160928
GO:0050764	regulation of phagocytosis	biological_process	7	1	519	6	18011	0.160928
GO:0003223	ventricular compact myocardium morphogenesis	biological_process	9	1	519	6	18011	0.160928
GO:0010827	regulation of glucose transmembrane transport	biological_process	8	1	519	6	18011	0.160928
GO:0060044	negative regulation of cardiac muscle cell proliferation	biological_process	8	1	519	6	18011	0.160928
GO:0031915	positive regulation of synaptic plasticity	biological_process	10	1	519	6	18011	0.160928
GO:0019158	mannokinase activity	molecular_function	8	1	519	6	18011	0.160928
GO:0060740	prostate gland epithelium morphogenesis	biological_process	7	1	519	6	18011	0.160928
GO:0045409	negative regulation of interleukin-6 biosynthetic process	biological_process	9	1	519	6	18011	0.160928
GO:0033162	melanosome membrane	cellular_component	7	1	519	6	18011	0.160928
GO:0050667	homocysteine metabolic process	biological_process	10	1	519	6	18011	0.160928
GO:0061371	determination of heart left/right asymmetry	biological_process	8	1	519	6	18011	0.160928
GO:0030214	hyaluronan catabolic process	biological_process	9	1	519	6	18011	0.160928
GO:0048545	response to steroid hormone	biological_process	6	1	519	6	18011	0.160928
GO:0031402	sodium ion binding	molecular_function	8	1	519	6	18011	0.160928
GO:0061156	pulmonary artery morphogenesis	biological_process	8	1	519	6	18011	0.160928
GO:0034137	positive regulation of toll-like receptor 2 signaling pathway	biological_process	10	1	519	6	18011	0.160928
GO:0030323	respiratory tube development	biological_process	6	1	519	6	18011	0.160928
GO:0060463	lung lobe morphogenesis	biological_process	5	1	519	6	18011	0.160928
GO:0060576	intestinal epithelial cell development	biological_process	8	1	519	6	18011	0.160928
GO:1990124	messenger ribonucleoprotein complex	cellular_component	5	1	519	6	18011	0.160928
GO:0004668	protein-arginine deiminase activity	molecular_function	7	1	519	6	18011	0.160928
GO:0034706	sodium channel complex	cellular_component	8	1	519	6	18011	0.160928
GO:0010890	positive regulation of sequestering of triglyceride	biological_process	7	1	519	6	18011	0.160928
GO:0097638	L-arginine import across plasma membrane	biological_process	13	1	519	6	18011	0.160928
GO:0071702	organic substance transport	biological_process	6	1	519	6	18011	0.160928
GO:0008865	fructokinase activity	molecular_function	8	1	519	6	18011	0.160928
GO:0051775	response to redox state	biological_process	4	1	519	6	18011	0.160928
GO:0006968	cellular defense response	biological_process	6	1	519	6	18011	0.160928
GO:0010756	positive regulation of plasminogen activation	biological_process	11	1	519	6	18011	0.160928
GO:0030522	intracellular receptor signaling pathway	biological_process	5	2	519	25	18011	0.16137
GO:0036064	ciliary basal body	cellular_component	7	5	519	100	18011	0.162067
GO:0016042	lipid catabolic process	biological_process	6	4	519	74	18011	0.164698
GO:0007266	Rho protein signal transduction	biological_process	8	3	519	49	18011	0.167071
GO:0004177	aminopeptidase activity	molecular_function	8	2	519	26	18011	0.171664
GO:0051973	positive regulation of telomerase activity	biological_process	8	2	519	26	18011	0.171664
GO:0046658	anchored component of plasma membrane	cellular_component	6	2	519	26	18011	0.171664
GO:0071364	cellular response to epidermal growth factor stimulus	biological_process	6	2	519	26	18011	0.171664
GO:0098982	GABA-ergic synapse	cellular_component	4	3	519	50	18011	0.174194
GO:0030425	dendrite	cellular_component	6	8	519	188	18011	0.176589
GO:0015631	tubulin binding	molecular_function	6	3	519	51	18011	0.1814
GO:0001578	microtubule bundle formation	biological_process	8	2	519	27	18011	0.182062
GO:0097009	energy homeostasis	biological_process	5	2	519	27	18011	0.182062
GO:0006520	cellular amino acid metabolic process	biological_process	8	2	519	27	18011	0.182062
GO:0030833	regulation of actin filament polymerization	biological_process	8	2	519	27	18011	0.182062
GO:0099132	ATP hydrolysis coupled cation transmembrane transport	biological_process	8	2	519	27	18011	0.182062
GO:0048863	stem cell differentiation	biological_process	6	2	519	27	18011	0.182062
GO:0060261	positive regulation of transcription initiation from RNA polymerase II promoter	biological_process	11	1	519	7	18011	0.185115
GO:0009143	nucleoside triphosphate catabolic process	biological_process	9	1	519	7	18011	0.185115
GO:0071813	lipoprotein particle binding	molecular_function	6	1	519	7	18011	0.185115
GO:0045056	transcytosis	biological_process	7	1	519	7	18011	0.185115
GO:0008210	estrogen metabolic process	biological_process	7	1	519	7	18011	0.185115
GO:0014070	response to organic cyclic compound	biological_process	6	1	519	7	18011	0.185115
GO:0090084	negative regulation of inclusion body assembly	biological_process	8	1	519	7	18011	0.185115
GO:0015280	ligand-gated sodium channel activity	molecular_function	9	1	519	7	18011	0.185115
GO:0005513	detection of calcium ion	biological_process	6	1	519	7	18011	0.185115
GO:0003208	cardiac ventricle morphogenesis	biological_process	6	1	519	7	18011	0.185115
GO:0045654	positive regulation of megakaryocyte differentiation	biological_process	9	1	519	7	18011	0.185115
GO:0002526	acute inflammatory response	biological_process	7	1	519	7	18011	0.185115
GO:0031386	protein tag	molecular_function	3	1	519	7	18011	0.185115
GO:0047617	acyl-CoA hydrolase activity	molecular_function	8	1	519	7	18011	0.185115
GO:0060575	intestinal epithelial cell differentiation	biological_process	8	1	519	7	18011	0.185115
GO:0048672	positive regulation of collateral sprouting	biological_process	8	1	519	7	18011	0.185115
GO:0071985	multivesicular body sorting pathway	biological_process	7	1	519	7	18011	0.185115
GO:0098915	membrane repolarization during ventricular cardiac muscle cell action potential	biological_process	11	1	519	7	18011	0.185115
GO:0032050	clathrin heavy chain binding	molecular_function	6	1	519	7	18011	0.185115
GO:0002070	epithelial cell maturation	biological_process	6	1	519	7	18011	0.185115
GO:0060428	lung epithelium development	biological_process	7	1	519	7	18011	0.185115
GO:0060670	branching involved in labyrinthine layer morphogenesis	biological_process	5	1	519	7	18011	0.185115
GO:0004415	hyalurononglucosaminidase activity	molecular_function	8	1	519	7	18011	0.185115
GO:0044539	long-chain fatty acid import into cell	biological_process	10	1	519	7	18011	0.185115
GO:0007171	activation of transmembrane receptor protein tyrosine kinase activity	biological_process	13	1	519	7	18011	0.185115
GO:0060087	relaxation of vascular smooth muscle	biological_process	8	1	519	7	18011	0.185115
GO:0018243	protein O-linked glycosylation via threonine	biological_process	11	1	519	7	18011	0.185115
GO:0006107	oxaloacetate metabolic process	biological_process	9	1	519	7	18011	0.185115
GO:0070233	negative regulation of T cell apoptotic process	biological_process	12	1	519	7	18011	0.185115
GO:1902961	positive regulation of aspartic-type endopeptidase activity involved in amyloid precursor protein catabolic process	biological_process	12	1	519	7	18011	0.185115
GO:0047429	nucleoside-triphosphate diphosphatase activity	molecular_function	8	1	519	7	18011	0.185115
GO:0000064	L-ornithine transmembrane transporter activity	molecular_function	7	1	519	7	18011	0.185115
GO:0060487	lung epithelial cell differentiation	biological_process	7	1	519	7	18011	0.185115
GO:0048762	mesenchymal cell differentiation	biological_process	6	1	519	7	18011	0.185115
GO:0042301	phosphate ion binding	molecular_function	6	1	519	7	18011	0.185115
GO:0035331	negative regulation of hippo signaling	biological_process	10	1	519	7	18011	0.185115
GO:0002741	positive regulation of cytokine secretion involved in immune response	biological_process	9	1	519	7	18011	0.185115
GO:1900246	positive regulation of RIG-I signaling pathway	biological_process	8	1	519	7	18011	0.185115
GO:0051014	actin filament severing	biological_process	5	1	519	7	18011	0.185115
GO:1904322	cellular response to forskolin	biological_process	7	1	519	7	18011	0.185115
GO:0032680	regulation of tumor necrosis factor production	biological_process	8	1	519	7	18011	0.185115
GO:0072091	regulation of stem cell proliferation	biological_process	7	1	519	7	18011	0.185115
GO:0072089	stem cell proliferation	biological_process	4	1	519	7	18011	0.185115
GO:0003344	pericardium morphogenesis	biological_process	8	1	519	7	18011	0.185115
GO:0030291	protein serine/threonine kinase inhibitor activity	molecular_function	8	1	519	7	18011	0.185115
GO:0043569	negative regulation of insulin-like growth factor receptor signaling pathway	biological_process	9	1	519	7	18011	0.185115
GO:0010737	protein kinase A signaling	biological_process	6	1	519	7	18011	0.185115
GO:0010898	positive regulation of triglyceride catabolic process	biological_process	9	1	519	7	18011	0.185115
GO:0005324	long-chain fatty acid transporter activity	molecular_function	5	1	519	7	18011	0.185115
GO:0007210	serotonin receptor signaling pathway	biological_process	5	1	519	7	18011	0.185115
GO:0032725	positive regulation of granulocyte macrophage colony-stimulating factor production	biological_process	8	1	519	7	18011	0.185115
GO:0005883	neurofilament	cellular_component	8	1	519	7	18011	0.185115
GO:1990266	neutrophil migration	biological_process	7	1	519	7	18011	0.185115
GO:0005337	nucleoside transmembrane transporter activity	molecular_function	6	1	519	7	18011	0.185115
GO:0060760	positive regulation of response to cytokine stimulus	biological_process	7	1	519	7	18011	0.185115
GO:0015189	L-lysine transmembrane transporter activity	molecular_function	7	1	519	7	18011	0.185115
GO:1902282	voltage-gated potassium channel activity involved in ventricular cardiac muscle cell action potential repolarization	molecular_function	11	1	519	7	18011	0.185115
GO:0031681	G-protein beta-subunit binding	molecular_function	5	1	519	7	18011	0.185115
GO:0003857	3-hydroxyacyl-CoA dehydrogenase activity	molecular_function	7	1	519	7	18011	0.185115
GO:1901642	nucleoside transmembrane transport	biological_process	9	1	519	7	18011	0.185115
GO:0034329	cell junction assembly	biological_process	6	1	519	7	18011	0.185115
GO:0048660	regulation of smooth muscle cell proliferation	biological_process	7	1	519	7	18011	0.185115
GO:0042629	mast cell granule	cellular_component	9	1	519	7	18011	0.185115
GO:0005980	glycogen catabolic process	biological_process	10	1	519	7	18011	0.185115
GO:0018401	peptidyl-proline hydroxylation to 4-hydroxy-L-proline	biological_process	7	1	519	7	18011	0.185115
GO:0002690	positive regulation of leukocyte chemotaxis	biological_process	8	1	519	7	18011	0.185115
GO:2001223	negative regulation of neuron migration	biological_process	9	1	519	7	18011	0.185115
GO:0097371	MDM2/MDM4 family protein binding	molecular_function	5	1	519	7	18011	0.185115
GO:0000166	nucleotide binding	molecular_function	5	35	519	1036	18011	0.185355
GO:0031012	extracellular matrix	cellular_component	4	8	519	191	18011	0.187244
GO:0005737	cytoplasm	cellular_component	5	105	519	3359	18011	0.18834
GO:0007420	brain development	biological_process	6	6	519	134	18011	0.190391
GO:0033209	tumor necrosis factor-mediated signaling pathway	biological_process	7	2	519	28	18011	0.192549
GO:0030017	sarcomere	cellular_component	5	2	519	28	18011	0.192549
GO:0042771	intrinsic apoptotic signaling pathway in response to DNA damage by p53 class mediator	biological_process	8	2	519	28	18011	0.192549
GO:0006955	immune response	biological_process	4	8	519	193	18011	0.194497
GO:0008081	phosphoric diester hydrolase activity	molecular_function	7	3	519	53	18011	0.196045
GO:0030165	PDZ domain binding	molecular_function	6	3	519	53	18011	0.196045
GO:0016705	oxidoreductase activity, acting on paired donors, with incorporation or reduction of molecular oxygen	molecular_function	5	4	519	80	18011	0.199291
GO:0007626	locomotory behavior	biological_process	4	4	519	80	18011	0.199291
GO:0071773	cellular response to BMP stimulus	biological_process	8	2	519	29	18011	0.203113
GO:0007163	establishment or maintenance of cell polarity	biological_process	4	2	519	29	18011	0.203113
GO:0030501	positive regulation of bone mineralization	biological_process	8	2	519	29	18011	0.203113
GO:0004601	peroxidase activity	molecular_function	4	2	519	29	18011	0.203113
GO:0032956	regulation of actin cytoskeleton organization	biological_process	7	3	519	54	18011	0.203472
GO:0044212	transcription regulatory region DNA binding	molecular_function	7	8	519	196	18011	0.20559
GO:0008283	cell population proliferation	biological_process	3	6	519	138	18011	0.208231
GO:0046548	retinal rod cell development	biological_process	9	1	519	8	18011	0.208605
GO:0007260	tyrosine phosphorylation of STAT protein	biological_process	11	1	519	8	18011	0.208605
GO:0048643	positive regulation of skeletal muscle tissue development	biological_process	10	1	519	8	18011	0.208605
GO:0099566	regulation of postsynaptic cytosolic calcium ion concentration	biological_process	13	1	519	8	18011	0.208605
GO:1902176	negative regulation of oxidative stress-induced intrinsic apoptotic signaling pathway	biological_process	9	1	519	8	18011	0.208605
GO:0009101	glycoprotein biosynthetic process	biological_process	8	1	519	8	18011	0.208605
GO:1904153	negative regulation of retrograde protein transport, ER to cytosol	biological_process	11	1	519	8	18011	0.208605
GO:0000138	Golgi trans cisterna	cellular_component	8	1	519	8	18011	0.208605
GO:0051451	myoblast migration	biological_process	8	1	519	8	18011	0.208605
GO:0042074	cell migration involved in gastrulation	biological_process	8	1	519	8	18011	0.208605
GO:0061001	regulation of dendritic spine morphogenesis	biological_process	10	1	519	8	18011	0.208605
GO:0042577	lipid phosphatase activity	molecular_function	8	1	519	8	18011	0.208605
GO:0001706	endoderm formation	biological_process	6	1	519	8	18011	0.208605
GO:0006941	striated muscle contraction	biological_process	7	1	519	8	18011	0.208605
GO:0034663	endoplasmic reticulum chaperone complex	cellular_component	4	1	519	8	18011	0.208605
GO:0016817	hydrolase activity, acting on acid anhydrides	molecular_function	5	1	519	8	18011	0.208605
GO:0044321	response to leptin	biological_process	6	1	519	8	18011	0.208605
GO:0048617	embryonic foregut morphogenesis	biological_process	6	1	519	8	18011	0.208605
GO:0097197	tetraspanin-enriched microdomain	cellular_component	5	1	519	8	18011	0.208605
GO:0008514	organic anion transmembrane transporter activity	molecular_function	7	1	519	8	18011	0.208605
GO:0016600	flotillin complex	cellular_component	6	1	519	8	18011	0.208605
GO:0007202	activation of phospholipase C activity	biological_process	11	1	519	8	18011	0.208605
GO:0010669	epithelial structure maintenance	biological_process	8	1	519	8	18011	0.208605
GO:0071482	cellular response to light stimulus	biological_process	7	1	519	8	18011	0.208605
GO:0032825	positive regulation of natural killer cell differentiation	biological_process	10	1	519	8	18011	0.208605
GO:1903401	L-lysine transmembrane transport	biological_process	8	1	519	8	18011	0.208605
GO:0010614	negative regulation of cardiac muscle hypertrophy	biological_process	10	1	519	8	18011	0.208605
GO:0032432	actin filament bundle	cellular_component	6	1	519	8	18011	0.208605
GO:0046598	positive regulation of viral entry into host cell	biological_process	10	1	519	8	18011	0.208605
GO:1900119	positive regulation of execution phase of apoptosis	biological_process	10	1	519	8	18011	0.208605
GO:0048681	negative regulation of axon regeneration	biological_process	8	1	519	8	18011	0.208605
GO:0015181	arginine transmembrane transporter activity	molecular_function	7	1	519	8	18011	0.208605
GO:0033180	proton-transporting V-type ATPase, V1 domain	cellular_component	6	1	519	8	18011	0.208605
GO:0043653	mitochondrial fragmentation involved in apoptotic process	biological_process	8	1	519	8	18011	0.208605
GO:0003810	protein-glutamine gamma-glutamyltransferase activity	molecular_function	7	1	519	8	18011	0.208605
GO:0005536	glucose binding	molecular_function	6	1	519	8	18011	0.208605
GO:0006796	phosphate-containing compound metabolic process	biological_process	6	1	519	8	18011	0.208605
GO:0045926	negative regulation of growth	biological_process	6	1	519	8	18011	0.208605
GO:0046785	microtubule polymerization	biological_process	9	1	519	8	18011	0.208605
GO:0042532	negative regulation of tyrosine phosphorylation of STAT protein	biological_process	11	1	519	8	18011	0.208605
GO:0018095	protein polyglutamylation	biological_process	11	1	519	8	18011	0.208605
GO:0060009	Sertoli cell development	biological_process	7	1	519	8	18011	0.208605
GO:0014912	negative regulation of smooth muscle cell migration	biological_process	9	1	519	8	18011	0.208605
GO:0031432	titin binding	molecular_function	6	1	519	8	18011	0.208605
GO:2000648	positive regulation of stem cell proliferation	biological_process	8	1	519	8	18011	0.208605
GO:0034709	methylosome	cellular_component	6	1	519	8	18011	0.208605
GO:0030836	positive regulation of actin filament depolymerization	biological_process	9	1	519	8	18011	0.208605
GO:0015711	organic anion transport	biological_process	8	1	519	8	18011	0.208605
GO:0001574	ganglioside biosynthetic process	biological_process	11	1	519	8	18011	0.208605
GO:0051013	microtubule severing	biological_process	8	1	519	8	18011	0.208605
GO:0035259	glucocorticoid receptor binding	molecular_function	9	1	519	8	18011	0.208605
GO:1900272	negative regulation of long-term synaptic potentiation	biological_process	6	1	519	8	18011	0.208605
GO:0051302	regulation of cell division	biological_process	6	1	519	8	18011	0.208605
GO:0051764	actin crosslink formation	biological_process	7	1	519	8	18011	0.208605
GO:0003094	glomerular filtration	biological_process	7	1	519	8	18011	0.208605
GO:0097345	mitochondrial outer membrane permeabilization	biological_process	10	1	519	8	18011	0.208605
GO:0051127	positive regulation of actin nucleation	biological_process	10	1	519	8	18011	0.208605
GO:0014823	response to activity	biological_process	4	1	519	8	18011	0.208605
GO:0003334	keratinocyte development	biological_process	7	1	519	8	18011	0.208605
GO:1900006	positive regulation of dendrite development	biological_process	12	1	519	8	18011	0.208605
GO:0050778	positive regulation of immune response	biological_process	7	1	519	8	18011	0.208605
GO:0023052	signaling	biological_process	3	1	519	8	18011	0.208605
GO:0070365	hepatocyte differentiation	biological_process	7	1	519	8	18011	0.208605
GO:0060081	membrane hyperpolarization	biological_process	6	1	519	8	18011	0.208605
GO:0048266	behavioral response to pain	biological_process	4	1	519	8	18011	0.208605
GO:0070493	thrombin-activated receptor signaling pathway	biological_process	6	1	519	8	18011	0.208605
GO:0043065	positive regulation of apoptotic process	biological_process	9	8	519	197	18011	0.209343
GO:0030336	negative regulation of cell migration	biological_process	8	4	519	82	18011	0.21128
GO:0005160	transforming growth factor beta receptor binding	molecular_function	7	2	519	30	18011	0.213739
GO:0042277	peptide binding	molecular_function	5	2	519	30	18011	0.213739
GO:0051262	protein tetramerization	biological_process	8	2	519	30	18011	0.213739
GO:0031901	early endosome membrane	cellular_component	9	2	519	30	18011	0.213739
GO:0071320	cellular response to cAMP	biological_process	9	2	519	30	18011	0.213739
GO:0007017	microtubule-based process	biological_process	4	2	519	30	18011	0.213739
GO:0035556	intracellular signal transduction	biological_process	5	13	519	351	18011	0.21486
GO:0001822	kidney development	biological_process	6	4	519	83	18011	0.217349
GO:0005777	peroxisome	cellular_component	7	4	519	83	18011	0.217349
GO:0009897	external side of plasma membrane	cellular_component	5	9	519	231	18011	0.223798
GO:0043507	positive regulation of JUN kinase activity	biological_process	13	2	519	31	18011	0.224415
GO:0048015	phosphatidylinositol-mediated signaling	biological_process	7	2	519	31	18011	0.224415
GO:0030864	cortical actin cytoskeleton	cellular_component	8	2	519	31	18011	0.224415
GO:0034504	protein localization to nucleus	biological_process	8	2	519	31	18011	0.224415
GO:0045334	clathrin-coated endocytic vesicle	cellular_component	9	1	519	9	18011	0.23142
GO:0045176	apical protein localization	biological_process	6	1	519	9	18011	0.23142
GO:0003143	embryonic heart tube morphogenesis	biological_process	6	1	519	9	18011	0.23142
GO:0008061	chitin binding	molecular_function	5	1	519	9	18011	0.23142
GO:0032060	bleb assembly	biological_process	8	1	519	9	18011	0.23142
GO:0001817	regulation of cytokine production	biological_process	6	1	519	9	18011	0.23142
GO:0048012	hepatocyte growth factor receptor signaling pathway	biological_process	8	1	519	9	18011	0.23142
GO:0019789	SUMO transferase activity	molecular_function	6	1	519	9	18011	0.23142
GO:0007435	salivary gland morphogenesis	biological_process	7	1	519	9	18011	0.23142
GO:0016540	protein autoprocessing	biological_process	9	1	519	9	18011	0.23142
GO:0042267	natural killer cell mediated cytotoxicity	biological_process	5	1	519	9	18011	0.23142
GO:0010744	positive regulation of macrophage derived foam cell differentiation	biological_process	8	1	519	9	18011	0.23142
GO:0043568	positive regulation of insulin-like growth factor receptor signaling pathway	biological_process	9	1	519	9	18011	0.23142
GO:1902004	positive regulation of amyloid-beta formation	biological_process	9	1	519	9	18011	0.23142
GO:0090280	positive regulation of calcium ion import	biological_process	10	1	519	9	18011	0.23142
GO:0045294	alpha-catenin binding	molecular_function	5	1	519	9	18011	0.23142
GO:0070593	dendrite self-avoidance	biological_process	6	1	519	9	18011	0.23142
GO:0030033	microvillus assembly	biological_process	8	1	519	9	18011	0.23142
GO:0090197	positive regulation of chemokine secretion	biological_process	9	1	519	9	18011	0.23142
GO:0060068	vagina development	biological_process	8	1	519	9	18011	0.23142
GO:0071398	cellular response to fatty acid	biological_process	7	1	519	9	18011	0.23142
GO:0046621	negative regulation of organ growth	biological_process	8	1	519	9	18011	0.23142
GO:0097623	potassium ion export across plasma membrane	biological_process	11	1	519	9	18011	0.23142
GO:0008381	mechanosensitive ion channel activity	molecular_function	8	1	519	9	18011	0.23142
GO:0001779	natural killer cell differentiation	biological_process	8	1	519	9	18011	0.23142
GO:0070262	peptidyl-serine dephosphorylation	biological_process	10	1	519	9	18011	0.23142
GO:0031274	positive regulation of pseudopodium assembly	biological_process	11	1	519	9	18011	0.23142
GO:0045086	positive regulation of interleukin-2 biosynthetic process	biological_process	9	1	519	9	18011	0.23142
GO:0008328	ionotropic glutamate receptor complex	cellular_component	7	1	519	9	18011	0.23142
GO:0006707	cholesterol catabolic process	biological_process	9	1	519	9	18011	0.23142
GO:0034185	apolipoprotein binding	molecular_function	5	1	519	9	18011	0.23142
GO:0042308	negative regulation of protein import into nucleus	biological_process	10	1	519	9	18011	0.23142
GO:0003139	secondary heart field specification	biological_process	8	1	519	9	18011	0.23142
GO:0032794	GTPase activating protein binding	molecular_function	5	1	519	9	18011	0.23142
GO:0019911	structural constituent of myelin sheath	molecular_function	4	1	519	9	18011	0.23142
GO:0031957	very long-chain fatty acid-CoA ligase activity	molecular_function	8	1	519	9	18011	0.23142
GO:0055064	chloride ion homeostasis	biological_process	10	1	519	9	18011	0.23142
GO:0031258	lamellipodium membrane	cellular_component	6	1	519	9	18011	0.23142
GO:0008194	UDP-glycosyltransferase activity	molecular_function	6	1	519	9	18011	0.23142
GO:0018242	protein O-linked glycosylation via serine	biological_process	11	1	519	9	18011	0.23142
GO:0006108	malate metabolic process	biological_process	9	1	519	9	18011	0.23142
GO:0019869	chloride channel inhibitor activity	molecular_function	7	1	519	9	18011	0.23142
GO:0042730	fibrinolysis	biological_process	9	1	519	9	18011	0.23142
GO:0044030	regulation of DNA methylation	biological_process	9	1	519	9	18011	0.23142
GO:2000009	negative regulation of protein localization to cell surface	biological_process	7	1	519	9	18011	0.23142
GO:0043395	heparan sulfate proteoglycan binding	molecular_function	6	1	519	9	18011	0.23142
GO:0045821	positive regulation of glycolytic process	biological_process	11	1	519	9	18011	0.23142
GO:0033089	positive regulation of T cell differentiation in thymus	biological_process	11	1	519	9	18011	0.23142
GO:0032930	positive regulation of superoxide anion generation	biological_process	10	1	519	9	18011	0.23142
GO:0033210	leptin-mediated signaling pathway	biological_process	7	1	519	9	18011	0.23142
GO:0016500	protein-hormone receptor activity	molecular_function	5	1	519	9	18011	0.23142
GO:0032461	positive regulation of protein oligomerization	biological_process	8	1	519	9	18011	0.23142
GO:0060711	labyrinthine layer development	biological_process	6	1	519	9	18011	0.23142
GO:0030897	HOPS complex	cellular_component	5	1	519	9	18011	0.23142
GO:0099523	presynaptic cytosol	cellular_component	4	1	519	9	18011	0.23142
GO:0033622	integrin activation	biological_process	7	1	519	9	18011	0.23142
GO:0042627	chylomicron	cellular_component	5	1	519	9	18011	0.23142
GO:0045777	positive regulation of blood pressure	biological_process	6	1	519	9	18011	0.23142
GO:0031672	A band	cellular_component	5	1	519	9	18011	0.23142
GO:0001649	osteoblast differentiation	biological_process	6	3	519	58	18011	0.233777
GO:0007050	cell cycle arrest	biological_process	5	3	519	58	18011	0.233777
GO:0006096	glycolytic process	biological_process	10	2	519	32	18011	0.23513
GO:0045597	positive regulation of cell differentiation	biological_process	7	2	519	32	18011	0.23513
GO:0050853	B cell receptor signaling pathway	biological_process	8	2	519	32	18011	0.23513
GO:0045214	sarcomere organization	biological_process	9	2	519	32	18011	0.23513
GO:0001772	immunological synapse	cellular_component	5	2	519	32	18011	0.23513
GO:0005815	microtubule organizing center	cellular_component	6	5	519	115	18011	0.237644
GO:0007411	axon guidance	biological_process	6	5	519	116	18011	0.243005
GO:0030335	positive regulation of cell migration	biological_process	8	7	519	176	18011	0.245611
GO:0004553	hydrolase activity, hydrolyzing O-glycosyl compounds	molecular_function	6	2	519	33	18011	0.245873
GO:0009898	cytoplasmic side of plasma membrane	cellular_component	5	2	519	33	18011	0.245873
GO:0009636	response to toxic substance	biological_process	5	2	519	33	18011	0.245873
GO:0001707	mesoderm formation	biological_process	6	2	519	33	18011	0.245873
GO:0030705	cytoskeleton-dependent intracellular transport	biological_process	7	1	519	10	18011	0.253578
GO:0030277	maintenance of gastrointestinal epithelium	biological_process	9	1	519	10	18011	0.253578
GO:0001823	mesonephros development	biological_process	7	1	519	10	18011	0.253578
GO:0016790	thiolester hydrolase activity	molecular_function	6	1	519	10	18011	0.253578
GO:0007512	adult heart development	biological_process	7	1	519	10	18011	0.253578
GO:0030193	regulation of blood coagulation	biological_process	7	1	519	10	18011	0.253578
GO:0007168	receptor guanylyl cyclase signaling pathway	biological_process	7	1	519	10	18011	0.253578
GO:0050921	positive regulation of chemotaxis	biological_process	8	1	519	10	18011	0.253578
GO:0004712	protein serine/threonine/tyrosine kinase activity	molecular_function	8	1	519	10	18011	0.253578
GO:0022414	reproductive process	biological_process	3	1	519	10	18011	0.253578
GO:1900029	positive regulation of ruffle assembly	biological_process	10	1	519	10	18011	0.253578
GO:0010804	negative regulation of tumor necrosis factor-mediated signaling pathway	biological_process	10	1	519	10	18011	0.253578
GO:0008188	neuropeptide receptor activity	molecular_function	7	1	519	10	18011	0.253578
GO:0032780	negative regulation of ATPase activity	biological_process	8	1	519	10	18011	0.253578
GO:0060993	kidney morphogenesis	biological_process	6	1	519	10	18011	0.253578
GO:1901612	cardiolipin binding	molecular_function	7	1	519	10	18011	0.253578
GO:0019953	sexual reproduction	biological_process	4	1	519	10	18011	0.253578
GO:0032421	stereocilium bundle	cellular_component	5	1	519	10	18011	0.253578
GO:0015347	sodium-independent organic anion transmembrane transporter activity	molecular_function	8	1	519	10	18011	0.253578
GO:0140289	protein mono-ADP-ribosylation	biological_process	10	1	519	10	18011	0.253578
GO:0042834	peptidoglycan binding	molecular_function	6	1	519	10	18011	0.253578
GO:0060674	placenta blood vessel development	biological_process	6	1	519	10	18011	0.253578
GO:0060445	branching involved in salivary gland morphogenesis	biological_process	7	1	519	10	18011	0.253578
GO:0050435	amyloid-beta metabolic process	biological_process	8	1	519	10	18011	0.253578
GO:0098962	regulation of postsynaptic neurotransmitter receptor activity	biological_process	8	1	519	10	18011	0.253578
GO:0001778	plasma membrane repair	biological_process	7	1	519	10	18011	0.253578
GO:0031639	plasminogen activation	biological_process	10	1	519	10	18011	0.253578
GO:0006171	cAMP biosynthetic process	biological_process	12	1	519	10	18011	0.253578
GO:0032402	melanosome transport	biological_process	9	1	519	10	18011	0.253578
GO:0006228	UTP biosynthetic process	biological_process	12	1	519	10	18011	0.253578
GO:0016594	glycine binding	molecular_function	5	1	519	10	18011	0.253578
GO:0071803	positive regulation of podosome assembly	biological_process	8	1	519	10	18011	0.253578
GO:0090162	establishment of epithelial cell polarity	biological_process	6	1	519	10	18011	0.253578
GO:0036128	CatSper complex	cellular_component	10	1	519	10	18011	0.253578
GO:0050871	positive regulation of B cell activation	biological_process	9	1	519	10	18011	0.253578
GO:0060546	negative regulation of necroptotic process	biological_process	10	1	519	10	18011	0.253578
GO:0030259	lipid glycosylation	biological_process	8	1	519	10	18011	0.253578
GO:0043252	sodium-independent organic anion transport	biological_process	9	1	519	10	18011	0.253578
GO:0046839	phospholipid dephosphorylation	biological_process	8	1	519	10	18011	0.253578
GO:0015937	coenzyme A biosynthetic process	biological_process	8	1	519	10	18011	0.253578
GO:1902741	positive regulation of interferon-alpha secretion	biological_process	10	1	519	10	18011	0.253578
GO:0030239	myofibril assembly	biological_process	7	1	519	10	18011	0.253578
GO:0071285	cellular response to lithium ion	biological_process	8	1	519	10	18011	0.253578
GO:0060272	embryonic skeletal joint morphogenesis	biological_process	8	1	519	10	18011	0.253578
GO:0051378	serotonin binding	molecular_function	5	1	519	10	18011	0.253578
GO:0070166	enamel mineralization	biological_process	8	1	519	10	18011	0.253578
GO:0006910	phagocytosis, recognition	biological_process	5	1	519	10	18011	0.253578
GO:0070935	3'-UTR-mediated mRNA stabilization	biological_process	12	1	519	10	18011	0.253578
GO:0003215	cardiac right ventricle morphogenesis	biological_process	7	1	519	10	18011	0.253578
GO:0060174	limb bud formation	biological_process	5	1	519	10	18011	0.253578
GO:0031994	insulin-like growth factor I binding	molecular_function	7	1	519	10	18011	0.253578
GO:0021670	lateral ventricle development	biological_process	5	1	519	10	18011	0.253578
GO:0039706	co-receptor binding	molecular_function	5	1	519	10	18011	0.253578
GO:0015106	bicarbonate transmembrane transporter activity	molecular_function	8	1	519	10	18011	0.253578
GO:0016597	amino acid binding	molecular_function	7	1	519	10	18011	0.253578
GO:0042770	signal transduction in response to DNA damage	biological_process	7	1	519	10	18011	0.253578
GO:0007032	endosome organization	biological_process	7	2	519	34	18011	0.256632
GO:0007611	learning or memory	biological_process	4	2	519	34	18011	0.256632
GO:0009967	positive regulation of signal transduction	biological_process	8	2	519	34	18011	0.256632
GO:0005788	endoplasmic reticulum lumen	cellular_component	7	2	519	34	18011	0.256632
GO:0007043	cell-cell junction assembly	biological_process	7	2	519	34	18011	0.256632
GO:0097191	extrinsic apoptotic signaling pathway	biological_process	6	2	519	34	18011	0.256632
GO:0048286	lung alveolus development	biological_process	5	2	519	34	18011	0.256632
GO:0060070	canonical Wnt signaling pathway	biological_process	8	3	519	61	18011	0.257
GO:0009986	cell surface	cellular_component	4	14	519	398	18011	0.259809
GO:0001228	DNA-binding transcription activator activity, RNA polymerase II-specific	molecular_function	6	12	519	336	18011	0.264155
GO:0005874	microtubule	cellular_component	7	6	519	150	18011	0.264883
GO:0042391	regulation of membrane potential	biological_process	5	4	519	91	18011	0.267383
GO:0008009	chemokine activity	molecular_function	8	2	519	35	18011	0.267399
GO:0061631	ubiquitin conjugating enzyme activity	molecular_function	7	2	519	35	18011	0.267399
GO:0060048	cardiac muscle contraction	biological_process	8	2	519	35	18011	0.267399
GO:0042645	mitochondrial nucleoid	cellular_component	4	2	519	35	18011	0.267399
GO:0003727	single-stranded RNA binding	molecular_function	7	2	519	35	18011	0.267399
GO:0045444	fat cell differentiation	biological_process	6	3	519	63	18011	0.272651
GO:0005516	calmodulin binding	molecular_function	5	4	519	92	18011	0.273787
GO:0002064	epithelial cell development	biological_process	6	1	519	11	18011	0.275099
GO:0007175	negative regulation of epidermal growth factor-activated receptor activity	biological_process	10	1	519	11	18011	0.275099
GO:0005960	glycine cleavage complex	cellular_component	6	1	519	11	18011	0.275099
GO:0004029	aldehyde dehydrogenase (NAD) activity	molecular_function	7	1	519	11	18011	0.275099
GO:0043240	Fanconi anaemia nuclear complex	cellular_component	4	1	519	11	18011	0.275099
GO:0021795	cerebral cortex cell migration	biological_process	9	1	519	11	18011	0.275099
GO:1901799	negative regulation of proteasomal protein catabolic process	biological_process	11	1	519	11	18011	0.275099
GO:0031214	biomineral tissue development	biological_process	6	1	519	11	18011	0.275099
GO:0000185	activation of MAPKKK activity	biological_process	13	1	519	11	18011	0.275099
GO:0032793	positive regulation of CREB transcription factor activity	biological_process	7	1	519	11	18011	0.275099
GO:0010043	response to zinc ion	biological_process	7	1	519	11	18011	0.275099
GO:0035497	cAMP response element binding	molecular_function	11	1	519	11	18011	0.275099
GO:0072001	renal system development	biological_process	6	1	519	11	18011	0.275099
GO:0016064	immunoglobulin mediated immune response	biological_process	8	1	519	11	18011	0.275099
GO:0008209	androgen metabolic process	biological_process	7	1	519	11	18011	0.275099
GO:0048066	developmental pigmentation	biological_process	4	1	519	11	18011	0.275099
GO:0006241	CTP biosynthetic process	biological_process	12	1	519	11	18011	0.275099
GO:0031143	pseudopodium	cellular_component	6	1	519	11	18011	0.275099
GO:0006958	complement activation, classical pathway	biological_process	6	1	519	11	18011	0.275099
GO:0008392	arachidonic acid epoxygenase activity	molecular_function	7	1	519	11	18011	0.275099
GO:0006491	N-glycan processing	biological_process	8	1	519	11	18011	0.275099
GO:0021756	striatum development	biological_process	5	1	519	11	18011	0.275099
GO:0045670	regulation of osteoclast differentiation	biological_process	9	1	519	11	18011	0.275099
GO:0004017	adenylate kinase activity	molecular_function	8	1	519	11	18011	0.275099
GO:0050710	negative regulation of cytokine secretion	biological_process	8	1	519	11	18011	0.275099
GO:0006518	peptide metabolic process	biological_process	7	1	519	11	18011	0.275099
GO:0042101	T cell receptor complex	cellular_component	6	1	519	11	18011	0.275099
GO:0060292	long-term synaptic depression	biological_process	10	1	519	11	18011	0.275099
GO:0042832	defense response to protozoan	biological_process	8	1	519	11	18011	0.275099
GO:0033690	positive regulation of osteoblast proliferation	biological_process	8	1	519	11	18011	0.275099
GO:0042325	regulation of phosphorylation	biological_process	9	1	519	11	18011	0.275099
GO:0004383	guanylate cyclase activity	molecular_function	5	1	519	11	18011	0.275099
GO:0004467	long-chain fatty acid-CoA ligase activity	molecular_function	8	1	519	11	18011	0.275099
GO:0019373	epoxygenase P450 pathway	biological_process	12	1	519	11	18011	0.275099
GO:0016772	transferase activity, transferring phosphorus-containing groups	molecular_function	5	1	519	11	18011	0.275099
GO:0004016	adenylate cyclase activity	molecular_function	5	1	519	11	18011	0.275099
GO:0004697	protein kinase C activity	molecular_function	9	1	519	11	18011	0.275099
GO:0005545	1-phosphatidylinositol binding	molecular_function	7	1	519	11	18011	0.275099
GO:0030502	negative regulation of bone mineralization	biological_process	8	1	519	11	18011	0.275099
GO:0010369	chromocenter	cellular_component	7	1	519	11	18011	0.275099
GO:0090399	replicative senescence	biological_process	6	1	519	11	18011	0.275099
GO:0045295	gamma-catenin binding	molecular_function	5	1	519	11	18011	0.275099
GO:0016486	peptide hormone processing	biological_process	8	1	519	11	18011	0.275099
GO:0006661	phosphatidylinositol biosynthetic process	biological_process	10	1	519	11	18011	0.275099
GO:0032740	positive regulation of interleukin-17 production	biological_process	8	1	519	11	18011	0.275099
GO:0006183	GTP biosynthetic process	biological_process	12	1	519	11	18011	0.275099
GO:0002755	MyD88-dependent toll-like receptor signaling pathway	biological_process	9	1	519	11	18011	0.275099
GO:0015269	calcium-activated potassium channel activity	molecular_function	9	1	519	11	18011	0.275099
GO:0031110	regulation of microtubule polymerization or depolymerization	biological_process	8	1	519	11	18011	0.275099
GO:0042989	sequestering of actin monomers	biological_process	10	1	519	11	18011	0.275099
GO:0004653	polypeptide N-acetylgalactosaminyltransferase activity	molecular_function	8	1	519	11	18011	0.275099
GO:0060347	heart trabecula formation	biological_process	6	1	519	11	18011	0.275099
GO:0001657	ureteric bud development	biological_process	7	2	519	36	18011	0.278164
GO:0001917	photoreceptor inner segment	cellular_component	5	2	519	36	18011	0.278164
GO:0046330	positive regulation of JNK cascade	biological_process	13	3	519	64	18011	0.280516
GO:0034976	response to endoplasmic reticulum stress	biological_process	6	3	519	65	18011	0.2884
GO:0007204	positive regulation of cytosolic calcium ion concentration	biological_process	13	3	519	65	18011	0.2884
GO:0005200	structural constituent of cytoskeleton	molecular_function	4	2	519	37	18011	0.288918
GO:0030216	keratinocyte differentiation	biological_process	8	2	519	37	18011	0.288918
GO:0006936	muscle contraction	biological_process	6	2	519	37	18011	0.288918
GO:0005216	ion channel activity	molecular_function	6	7	519	186	18011	0.29006
GO:0097202	activation of cysteine-type endopeptidase activity	biological_process	10	1	519	12	18011	0.296
GO:0044305	calyx of Held	cellular_component	7	1	519	12	18011	0.296
GO:0016810	hydrolase activity, acting on carbon-nitrogen (but not peptide) bonds	molecular_function	5	1	519	12	18011	0.296
GO:0042574	retinal metabolic process	biological_process	11	1	519	12	18011	0.296
GO:0042594	response to starvation	biological_process	5	1	519	12	18011	0.296
GO:0035640	exploration behavior	biological_process	4	1	519	12	18011	0.296
GO:0086002	cardiac muscle cell action potential involved in contraction	biological_process	8	1	519	12	18011	0.296
GO:1902711	GABA-A receptor complex	cellular_component	6	1	519	12	18011	0.296
GO:0030676	Rac guanyl-nucleotide exchange factor activity	molecular_function	10	1	519	12	18011	0.296
GO:0030520	intracellular estrogen receptor signaling pathway	biological_process	7	1	519	12	18011	0.296
GO:0031267	small GTPase binding	molecular_function	7	1	519	12	18011	0.296
GO:0051571	positive regulation of histone H3-K4 methylation	biological_process	12	1	519	12	18011	0.296
GO:2000484	positive regulation of interleukin-8 secretion	biological_process	9	1	519	12	18011	0.296
GO:0030131	clathrin adaptor complex	cellular_component	7	1	519	12	18011	0.296
GO:0008195	phosphatidate phosphatase activity	molecular_function	8	1	519	12	18011	0.296
GO:0015020	glucuronosyltransferase activity	molecular_function	7	1	519	12	18011	0.296
GO:0051693	actin filament capping	biological_process	10	1	519	12	18011	0.296
GO:1902043	positive regulation of extrinsic apoptotic signaling pathway via death domain receptors	biological_process	11	1	519	12	18011	0.296
GO:0033630	positive regulation of cell adhesion mediated by integrin	biological_process	7	1	519	12	18011	0.296
GO:0015908	fatty acid transport	biological_process	8	1	519	12	18011	0.296
GO:0042311	vasodilation	biological_process	10	1	519	12	18011	0.296
GO:0015108	chloride transmembrane transporter activity	molecular_function	8	1	519	12	18011	0.296
GO:0008157	protein phosphatase 1 binding	molecular_function	8	1	519	12	18011	0.296
GO:0045178	basal part of cell	cellular_component	4	1	519	12	18011	0.296
GO:0030247	polysaccharide binding	molecular_function	5	1	519	12	18011	0.296
GO:0005005	transmembrane-ephrin receptor activity	molecular_function	11	1	519	12	18011	0.296
GO:0005885	Arp2/3 protein complex	cellular_component	4	1	519	12	18011	0.296
GO:0031435	mitogen-activated protein kinase kinase kinase binding	molecular_function	8	1	519	12	18011	0.296
GO:0015179	L-amino acid transmembrane transporter activity	molecular_function	8	1	519	12	18011	0.296
GO:0071577	zinc ion transmembrane transport	biological_process	11	1	519	12	18011	0.296
GO:0010765	positive regulation of sodium ion transport	biological_process	10	1	519	12	18011	0.296
GO:1902358	sulfate transmembrane transport	biological_process	10	1	519	12	18011	0.296
GO:0008097	5S rRNA binding	molecular_function	8	1	519	12	18011	0.296
GO:0005773	vacuole	cellular_component	6	1	519	12	18011	0.296
GO:0006833	water transport	biological_process	7	1	519	12	18011	0.296
GO:0071360	cellular response to exogenous dsRNA	biological_process	9	1	519	12	18011	0.296
GO:0051156	glucose 6-phosphate metabolic process	biological_process	7	1	519	12	18011	0.296
GO:0086005	ventricular cardiac muscle cell action potential	biological_process	9	1	519	12	18011	0.296
GO:0008028	monocarboxylic acid transmembrane transporter activity	molecular_function	7	1	519	12	18011	0.296
GO:0033628	regulation of cell adhesion mediated by integrin	biological_process	6	1	519	12	18011	0.296
GO:0007019	microtubule depolymerization	biological_process	9	1	519	12	18011	0.296
GO:0019464	glycine decarboxylation via glycine cleavage system	biological_process	13	1	519	12	18011	0.296
GO:0008271	secondary active sulfate transmembrane transporter activity	molecular_function	9	1	519	12	18011	0.296
GO:0051457	maintenance of protein location in nucleus	biological_process	8	1	519	12	18011	0.296
GO:0030030	cell projection organization	biological_process	5	1	519	12	18011	0.296
GO:0042535	positive regulation of tumor necrosis factor biosynthetic process	biological_process	10	1	519	12	18011	0.296
GO:0060340	positive regulation of type I interferon-mediated signaling pathway	biological_process	10	1	519	12	18011	0.296
GO:1900181	negative regulation of protein localization to nucleus	biological_process	9	1	519	12	18011	0.296
GO:0051968	positive regulation of synaptic transmission, glutamatergic	biological_process	9	1	519	12	18011	0.296
GO:0031640	killing of cells of other organism	biological_process	4	1	519	12	18011	0.296
GO:0043171	peptide catabolic process	biological_process	8	1	519	12	18011	0.296
GO:0034122	negative regulation of toll-like receptor signaling pathway	biological_process	7	1	519	12	18011	0.296
GO:0030007	cellular potassium ion homeostasis	biological_process	11	1	519	12	18011	0.296
GO:0090179	planar cell polarity pathway involved in neural tube closure	biological_process	10	1	519	12	18011	0.296
GO:0006879	cellular iron ion homeostasis	biological_process	12	3	519	66	18011	0.296301
GO:0008201	heparin binding	molecular_function	6	4	519	96	18011	0.299637
GO:0045785	positive regulation of cell adhesion	biological_process	6	2	519	38	18011	0.299653
GO:0008544	epidermis development	biological_process	6	2	519	38	18011	0.299653
GO:0006959	humoral immune response	biological_process	5	2	519	38	18011	0.299653
GO:0001942	hair follicle development	biological_process	6	2	519	38	18011	0.299653
GO:0004879	nuclear receptor activity	molecular_function	6	2	519	38	18011	0.299653
GO:0032508	DNA duplex unwinding	biological_process	9	2	519	39	18011	0.310361
GO:0097110	scaffold protein binding	molecular_function	5	2	519	39	18011	0.310361
GO:0008542	visual learning	biological_process	5	2	519	39	18011	0.310361
GO:0045787	positive regulation of cell cycle	biological_process	7	2	519	39	18011	0.310361
GO:0098655	cation transmembrane transport	biological_process	8	2	519	39	18011	0.310361
GO:0002244	hematopoietic progenitor cell differentiation	biological_process	6	3	519	68	18011	0.312137
GO:0005913	cell-cell adherens junction	cellular_component	5	3	519	68	18011	0.312137
GO:0031362	anchored component of external side of plasma membrane	cellular_component	7	1	519	13	18011	0.3163
GO:0070628	proteasome binding	molecular_function	5	1	519	13	18011	0.3163
GO:0005614	interstitial matrix	cellular_component	6	1	519	13	18011	0.3163
GO:0045907	positive regulation of vasoconstriction	biological_process	10	1	519	13	18011	0.3163
GO:0030889	negative regulation of B cell proliferation	biological_process	11	1	519	13	18011	0.3163
GO:0016651	oxidoreductase activity, acting on NAD(P)H	molecular_function	5	1	519	13	18011	0.3163
GO:0043403	skeletal muscle tissue regeneration	biological_process	7	1	519	13	18011	0.3163
GO:0015718	monocarboxylic acid transport	biological_process	10	1	519	13	18011	0.3163
GO:0014898	cardiac muscle hypertrophy in response to stress	biological_process	6	1	519	13	18011	0.3163
GO:0008553	proton-exporting ATPase activity, phosphorylative mechanism	molecular_function	10	1	519	13	18011	0.3163
GO:0034063	stress granule assembly	biological_process	9	1	519	13	18011	0.3163
GO:0000930	gamma-tubulin complex	cellular_component	4	1	519	13	18011	0.3163
GO:2000406	positive regulation of T cell migration	biological_process	9	1	519	13	18011	0.3163
GO:0048739	cardiac muscle fiber development	biological_process	9	1	519	13	18011	0.3163
GO:0051146	striated muscle cell differentiation	biological_process	7	1	519	13	18011	0.3163
GO:0044306	neuron projection terminus	cellular_component	5	1	519	13	18011	0.3163
GO:0060076	excitatory synapse	cellular_component	4	1	519	13	18011	0.3163
GO:1901214	regulation of neuron death	biological_process	7	1	519	13	18011	0.3163
GO:0002026	regulation of the force of heart contraction	biological_process	9	1	519	13	18011	0.3163
GO:0042789	mRNA transcription by RNA polymerase II	biological_process	10	1	519	13	18011	0.3163
GO:0003279	cardiac septum development	biological_process	5	1	519	13	18011	0.3163
GO:0042581	specific granule	cellular_component	9	1	519	13	18011	0.3163
GO:0051010	microtubule plus-end binding	molecular_function	8	1	519	13	18011	0.3163
GO:0001975	response to amphetamine	biological_process	6	1	519	13	18011	0.3163
GO:0005523	tropomyosin binding	molecular_function	6	1	519	13	18011	0.3163
GO:0003323	type B pancreatic cell development	biological_process	9	1	519	13	18011	0.3163
GO:0005940	septin ring	cellular_component	8	1	519	13	18011	0.3163
GO:0034361	very-low-density lipoprotein particle	cellular_component	6	1	519	13	18011	0.3163
GO:0031105	septin complex	cellular_component	4	1	519	13	18011	0.3163
GO:0008272	sulfate transport	biological_process	9	1	519	13	18011	0.3163
GO:0003382	epithelial cell morphogenesis	biological_process	8	1	519	13	18011	0.3163
GO:0045333	cellular respiration	biological_process	7	1	519	13	18011	0.3163
GO:1903508	positive regulation of nucleic acid-templated transcription	biological_process	10	3	519	69	18011	0.320065
GO:0050731	positive regulation of peptidyl-tyrosine phosphorylation	biological_process	11	3	519	69	18011	0.320065
GO:0031397	negative regulation of protein ubiquitination	biological_process	11	2	519	40	18011	0.321034
GO:0048839	inner ear development	biological_process	5	2	519	40	18011	0.321034
GO:0010468	regulation of gene expression	biological_process	7	7	519	194	18011	0.326848
GO:0008285	negative regulation of cell population proliferation	biological_process	7	9	519	259	18011	0.33133
GO:0008017	microtubule binding	molecular_function	7	7	519	195	18011	0.331501
GO:0007267	cell-cell signaling	biological_process	5	2	519	41	18011	0.331666
GO:0006826	iron ion transport	biological_process	10	2	519	41	18011	0.331666
GO:0004896	cytokine receptor activity	molecular_function	6	2	519	41	18011	0.331666
GO:0010862	positive regulation of pathway-restricted SMAD protein phosphorylation	biological_process	11	2	519	41	18011	0.331666
GO:0021915	neural tube development	biological_process	6	2	519	41	18011	0.331666
GO:0030178	negative regulation of Wnt signaling pathway	biological_process	9	2	519	41	18011	0.331666
GO:0004222	metalloendopeptidase activity	molecular_function	8	4	519	101	18011	0.332312
GO:0045454	cell redox homeostasis	biological_process	5	3	519	71	18011	0.335923
GO:0016829	lyase activity	molecular_function	4	3	519	71	18011	0.335923
GO:0050709	negative regulation of protein secretion	biological_process	10	1	519	14	18011	0.336016
GO:0001518	voltage-gated sodium channel complex	cellular_component	9	1	519	14	18011	0.336016
GO:0045721	negative regulation of gluconeogenesis	biological_process	11	1	519	14	18011	0.336016
GO:2000251	positive regulation of actin cytoskeleton reorganization	biological_process	10	1	519	14	18011	0.336016
GO:0005003	ephrin receptor activity	molecular_function	10	1	519	14	18011	0.336016
GO:0048041	focal adhesion assembly	biological_process	9	1	519	14	18011	0.336016
GO:0097194	execution phase of apoptosis	biological_process	4	1	519	14	18011	0.336016
GO:0035371	microtubule plus-end	cellular_component	7	1	519	14	18011	0.336016
GO:1990404	protein ADP-ribosylase activity	molecular_function	7	1	519	14	18011	0.336016
GO:0070064	proline-rich region binding	molecular_function	5	1	519	14	18011	0.336016
GO:0006693	prostaglandin metabolic process	biological_process	10	1	519	14	18011	0.336016
GO:0035458	cellular response to interferon-beta	biological_process	8	1	519	14	18011	0.336016
GO:0060749	mammary gland alveolus development	biological_process	5	1	519	14	18011	0.336016
GO:0035025	positive regulation of Rho protein signal transduction	biological_process	12	1	519	14	18011	0.336016
GO:2000010	positive regulation of protein localization to cell surface	biological_process	7	1	519	14	18011	0.336016
GO:0005504	fatty acid binding	molecular_function	5	1	519	14	18011	0.336016
GO:0005721	pericentric heterochromatin	cellular_component	8	1	519	14	18011	0.336016
GO:0030322	stabilization of membrane potential	biological_process	6	1	519	14	18011	0.336016
GO:2000649	regulation of sodium ion transmembrane transporter activity	biological_process	8	1	519	14	18011	0.336016
GO:0030031	cell projection assembly	biological_process	6	1	519	14	18011	0.336016
GO:0098632	cell-cell adhesion mediator activity	molecular_function	5	1	519	14	18011	0.336016
GO:0022841	potassium ion leak channel activity	molecular_function	9	1	519	14	18011	0.336016
GO:0006182	cGMP biosynthetic process	biological_process	12	1	519	14	18011	0.336016
GO:0090734	site of DNA damage	cellular_component	6	1	519	14	18011	0.336016
GO:0032481	positive regulation of type I interferon production	biological_process	8	1	519	14	18011	0.336016
GO:0033674	positive regulation of kinase activity	biological_process	11	1	519	14	18011	0.336016
GO:0071901	negative regulation of protein serine/threonine kinase activity	biological_process	12	1	519	14	18011	0.336016
GO:0030424	axon	cellular_component	6	7	519	196	18011	0.336165
GO:0045111	intermediate filament cytoskeleton	cellular_component	7	2	519	42	18011	0.342251
GO:0051536	iron-sulfur cluster binding	molecular_function	5	2	519	42	18011	0.342251
GO:0045296	cadherin binding	molecular_function	6	2	519	42	18011	0.342251
GO:0005102	signaling receptor binding	molecular_function	5	9	519	262	18011	0.343454
GO:0055037	recycling endosome	cellular_component	8	3	519	72	18011	0.343846
GO:0004497	monooxygenase activity	molecular_function	5	3	519	72	18011	0.343846
GO:0031966	mitochondrial membrane	cellular_component	5	3	519	72	18011	0.343846
GO:0060326	cell chemotaxis	biological_process	6	3	519	73	18011	0.351761
GO:0030334	regulation of cell migration	biological_process	7	3	519	73	18011	0.351761
GO:0062023	collagen-containing extracellular matrix	cellular_component	5	4	519	104	18011	0.352011
GO:0030971	receptor tyrosine kinase binding	molecular_function	6	2	519	43	18011	0.352781
GO:0042552	myelination	biological_process	6	2	519	43	18011	0.352781
GO:0015914	phospholipid transport	biological_process	8	2	519	43	18011	0.352781
GO:0001755	neural crest cell migration	biological_process	8	2	519	43	18011	0.352781
GO:0001750	photoreceptor outer segment	cellular_component	5	2	519	43	18011	0.352781
GO:0001836	release of cytochrome c from mitochondria	biological_process	8	1	519	15	18011	0.355164
GO:0008324	cation transmembrane transporter activity	molecular_function	6	1	519	15	18011	0.355164
GO:0005496	steroid binding	molecular_function	5	1	519	15	18011	0.355164
GO:0001676	long-chain fatty acid metabolic process	biological_process	10	1	519	15	18011	0.355164
GO:0001736	establishment of planar polarity	biological_process	6	1	519	15	18011	0.355164
GO:0007009	plasma membrane organization	biological_process	6	1	519	15	18011	0.355164
GO:0008016	regulation of heart contraction	biological_process	8	1	519	15	18011	0.355164
GO:0016018	cyclosporin A binding	molecular_function	5	1	519	15	18011	0.355164
GO:0046697	decidualization	biological_process	5	1	519	15	18011	0.355164
GO:0061640	cytoskeleton-dependent cytokinesis	biological_process	6	1	519	15	18011	0.355164
GO:0001965	G-protein alpha-subunit binding	molecular_function	5	1	519	15	18011	0.355164
GO:0099175	regulation of postsynapse organization	biological_process	8	1	519	15	18011	0.355164
GO:0006541	glutamine metabolic process	biological_process	11	1	519	15	18011	0.355164
GO:0031333	negative regulation of protein complex assembly	biological_process	7	1	519	15	18011	0.355164
GO:0032012	regulation of ARF protein signal transduction	biological_process	11	1	519	15	18011	0.355164
GO:0048596	embryonic camera-type eye morphogenesis	biological_process	8	1	519	15	18011	0.355164
GO:0098839	postsynaptic density membrane	cellular_component	5	1	519	15	18011	0.355164
GO:0061028	establishment of endothelial barrier	biological_process	8	1	519	15	18011	0.355164
GO:0016471	vacuolar proton-transporting V-type ATPase complex	cellular_component	7	1	519	15	18011	0.355164
GO:0048557	embryonic digestive tract morphogenesis	biological_process	7	1	519	15	18011	0.355164
GO:0048535	lymph node development	biological_process	7	1	519	15	18011	0.355164
GO:0003678	DNA helicase activity	molecular_function	10	1	519	15	18011	0.355164
GO:0043087	regulation of GTPase activity	biological_process	7	3	519	74	18011	0.359665
GO:0042981	regulation of apoptotic process	biological_process	8	5	519	137	18011	0.36073
GO:0005871	kinesin complex	cellular_component	5	2	519	44	18011	0.363253
GO:0003151	outflow tract morphogenesis	biological_process	5	2	519	44	18011	0.363253
GO:0030674	protein binding, bridging	molecular_function	5	2	519	44	18011	0.363253
GO:0016779	nucleotidyltransferase activity	molecular_function	6	2	519	44	18011	0.363253
GO:0042531	positive regulation of tyrosine phosphorylation of STAT protein	biological_process	11	2	519	44	18011	0.363253
GO:0051092	positive regulation of NF-kappaB transcription factor activity	biological_process	7	4	519	106	18011	0.36515
GO:0000278	mitotic cell cycle	biological_process	5	4	519	106	18011	0.36515
GO:0001666	response to hypoxia	biological_process	5	3	519	75	18011	0.367555
GO:0016491	oxidoreductase activity	molecular_function	4	13	519	401	18011	0.371922
GO:0060548	negative regulation of cell death	biological_process	7	2	519	45	18011	0.373659
GO:0032839	dendrite cytoplasm	cellular_component	9	1	519	16	18011	0.373761
GO:0032959	inositol trisphosphate biosynthetic process	biological_process	9	1	519	16	18011	0.373761
GO:0061436	establishment of skin barrier	biological_process	10	1	519	16	18011	0.373761
GO:0007216	G protein-coupled glutamate receptor signaling pathway	biological_process	6	1	519	16	18011	0.373761
GO:0009416	response to light stimulus	biological_process	6	1	519	16	18011	0.373761
GO:1904355	positive regulation of telomere capping	biological_process	11	1	519	16	18011	0.373761
GO:0046328	regulation of JNK cascade	biological_process	12	1	519	16	18011	0.373761
GO:0005086	ARF guanyl-nucleotide exchange factor activity	molecular_function	8	1	519	16	18011	0.373761
GO:0043122	regulation of I-kappaB kinase/NF-kappaB signaling	biological_process	9	1	519	16	18011	0.373761
GO:0005779	integral component of peroxisomal membrane	cellular_component	7	1	519	16	18011	0.373761
GO:0051482	positive regulation of cytosolic calcium ion concentration involved in phospholipase C-activating G protein-coupled signaling pathway	biological_process	14	1	519	16	18011	0.373761
GO:0043011	myeloid dendritic cell differentiation	biological_process	8	1	519	16	18011	0.373761
GO:0032426	stereocilium tip	cellular_component	4	1	519	16	18011	0.373761
GO:0048148	behavioral response to cocaine	biological_process	5	1	519	16	18011	0.373761
GO:0003180	aortic valve morphogenesis	biological_process	6	1	519	16	18011	0.373761
GO:0003009	skeletal muscle contraction	biological_process	8	1	519	16	18011	0.373761
GO:1990782	protein tyrosine kinase binding	molecular_function	8	1	519	16	18011	0.373761
GO:0055074	calcium ion homeostasis	biological_process	10	1	519	16	18011	0.373761
GO:0051443	positive regulation of ubiquitin-protein transferase activity	biological_process	12	1	519	16	18011	0.373761
GO:0001968	fibronectin binding	molecular_function	5	1	519	16	18011	0.373761
GO:0001533	cornified envelope	cellular_component	5	1	519	16	18011	0.373761
GO:0042326	negative regulation of phosphorylation	biological_process	10	1	519	16	18011	0.373761
GO:0004620	phospholipase activity	molecular_function	7	1	519	16	18011	0.373761
GO:0030318	melanocyte differentiation	biological_process	7	1	519	16	18011	0.373761
GO:0048662	negative regulation of smooth muscle cell proliferation	biological_process	8	1	519	16	18011	0.373761
GO:0004089	carbonate dehydratase activity	molecular_function	7	1	519	16	18011	0.373761
GO:0045954	positive regulation of natural killer cell mediated cytotoxicity	biological_process	8	1	519	16	18011	0.373761
GO:0031418	L-ascorbic acid binding	molecular_function	6	1	519	16	18011	0.373761
GO:0051928	positive regulation of calcium ion transport	biological_process	9	1	519	16	18011	0.373761
GO:0055008	cardiac muscle tissue morphogenesis	biological_process	7	1	519	16	18011	0.373761
GO:0032722	positive regulation of chemokine production	biological_process	8	1	519	16	18011	0.373761
GO:0098978	glutamatergic synapse	cellular_component	4	8	519	238	18011	0.379663
GO:0030141	secretory granule	cellular_component	8	2	519	46	18011	0.383996
GO:0005518	collagen binding	molecular_function	5	2	519	46	18011	0.383996
GO:0070374	positive regulation of ERK1 and ERK2 cascade	biological_process	12	5	519	142	18011	0.389397
GO:0007169	transmembrane receptor protein tyrosine kinase signaling pathway	biological_process	7	3	519	78	18011	0.391112
GO:0044325	ion channel binding	molecular_function	5	3	519	78	18011	0.391112
GO:0034314	Arp2/3 complex-mediated actin nucleation	biological_process	8	1	519	17	18011	0.391822
GO:0051019	mitogen-activated protein kinase binding	molecular_function	8	1	519	17	18011	0.391822
GO:0003951	NAD+ kinase activity	molecular_function	7	1	519	17	18011	0.391822
GO:0005868	cytoplasmic dynein complex	cellular_component	6	1	519	17	18011	0.391822
GO:0004950	chemokine receptor activity	molecular_function	8	1	519	17	18011	0.391822
GO:0035904	aorta development	biological_process	7	1	519	17	18011	0.391822
GO:0045995	regulation of embryonic development	biological_process	7	1	519	17	18011	0.391822
GO:0045216	cell-cell junction organization	biological_process	6	1	519	17	18011	0.391822
GO:0000159	protein phosphatase type 2A complex	cellular_component	5	1	519	17	18011	0.391822
GO:2000042	negative regulation of double-strand break repair via homologous recombination	biological_process	11	1	519	17	18011	0.391822
GO:0035255	ionotropic glutamate receptor binding	molecular_function	7	1	519	17	18011	0.391822
GO:0045022	early endosome to late endosome transport	biological_process	8	1	519	17	18011	0.391822
GO:0008307	structural constituent of muscle	molecular_function	4	1	519	17	18011	0.391822
GO:0001678	cellular glucose homeostasis	biological_process	9	1	519	17	18011	0.391822
GO:0007254	JNK cascade	biological_process	13	1	519	17	18011	0.391822
GO:0051604	protein maturation	biological_process	7	1	519	17	18011	0.391822
GO:0070840	dynein complex binding	molecular_function	5	1	519	17	18011	0.391822
GO:0004866	endopeptidase inhibitor activity	molecular_function	7	1	519	17	18011	0.391822
GO:0090023	positive regulation of neutrophil chemotaxis	biological_process	10	1	519	17	18011	0.391822
GO:0046427	positive regulation of receptor signaling pathway via JAK-STAT	biological_process	10	1	519	17	18011	0.391822
GO:0060045	positive regulation of cardiac muscle cell proliferation	biological_process	8	1	519	17	18011	0.391822
GO:0035327	transcriptionally active chromatin	cellular_component	7	1	519	17	18011	0.391822
GO:0034113	heterotypic cell-cell adhesion	biological_process	6	1	519	17	18011	0.391822
GO:0060324	face development	biological_process	5	1	519	17	18011	0.391822
GO:0035050	embryonic heart tube development	biological_process	6	1	519	17	18011	0.391822
GO:0051924	regulation of calcium ion transport	biological_process	9	1	519	17	18011	0.391822
GO:0060037	pharyngeal system development	biological_process	6	1	519	17	18011	0.391822
GO:0006911	phagocytosis, engulfment	biological_process	8	1	519	17	18011	0.391822
GO:0031069	hair follicle morphogenesis	biological_process	5	1	519	17	18011	0.391822
GO:0005248	voltage-gated sodium channel activity	molecular_function	9	1	519	17	18011	0.391822
GO:0042060	wound healing	biological_process	6	2	519	47	18011	0.394258
GO:0016798	hydrolase activity, acting on glycosyl bonds	molecular_function	5	2	519	47	18011	0.394258
GO:0002250	adaptive immune response	biological_process	5	2	519	47	18011	0.394258
GO:0051259	protein complex oligomerization	biological_process	7	2	519	47	18011	0.394258
GO:0030173	integral component of Golgi membrane	cellular_component	7	2	519	47	18011	0.394258
GO:0045669	positive regulation of osteoblast differentiation	biological_process	8	2	519	47	18011	0.394258
GO:0005789	endoplasmic reticulum membrane	cellular_component	5	10	519	309	18011	0.39961
GO:0000978	RNA polymerase II proximal promoter sequence-specific DNA binding	molecular_function	10	13	519	410	18011	0.402211
GO:0070098	chemokine-mediated signaling pathway	biological_process	7	2	519	48	18011	0.404441
GO:0043408	regulation of MAPK cascade	biological_process	10	2	519	48	18011	0.404441
GO:0004714	transmembrane receptor protein tyrosine kinase activity	molecular_function	9	2	519	48	18011	0.404441
GO:0043627	response to estrogen	biological_process	4	1	519	18	18011	0.409364
GO:0033627	cell adhesion mediated by integrin	biological_process	5	1	519	18	18011	0.409364
GO:0038191	neuropilin binding	molecular_function	6	1	519	18	18011	0.409364
GO:0051497	negative regulation of stress fiber assembly	biological_process	8	1	519	18	18011	0.409364
GO:0008340	determination of adult lifespan	biological_process	4	1	519	18	18011	0.409364
GO:0090314	positive regulation of protein targeting to membrane	biological_process	11	1	519	18	18011	0.409364
GO:0043539	protein serine/threonine kinase activator activity	molecular_function	8	1	519	18	18011	0.409364
GO:0002377	immunoglobulin production	biological_process	5	1	519	18	18011	0.409364
GO:0050768	negative regulation of neurogenesis	biological_process	9	1	519	18	18011	0.409364
GO:2001243	negative regulation of intrinsic apoptotic signaling pathway	biological_process	10	1	519	18	18011	0.409364
GO:0008376	acetylgalactosaminyltransferase activity	molecular_function	7	1	519	18	18011	0.409364
GO:0017080	sodium channel regulator activity	molecular_function	5	1	519	18	18011	0.409364
GO:0006082	organic acid metabolic process	biological_process	5	1	519	18	18011	0.409364
GO:0006270	DNA replication initiation	biological_process	8	1	519	18	18011	0.409364
GO:0034237	protein kinase A regulatory subunit binding	molecular_function	6	1	519	18	18011	0.409364
GO:0048747	muscle fiber development	biological_process	8	1	519	18	18011	0.409364
GO:0044183	protein folding chaperone	molecular_function	3	1	519	18	18011	0.409364
GO:0048646	anatomical structure formation involved in morphogenesis	biological_process	4	1	519	18	18011	0.409364
GO:0005385	zinc ion transmembrane transporter activity	molecular_function	10	1	519	18	18011	0.409364
GO:0045862	positive regulation of proteolysis	biological_process	9	1	519	18	18011	0.409364
GO:0004890	GABA-A receptor activity	molecular_function	7	1	519	18	18011	0.409364
GO:0045807	positive regulation of endocytosis	biological_process	8	1	519	18	18011	0.409364
GO:0010506	regulation of autophagy	biological_process	8	2	519	49	18011	0.414542
GO:0000902	cell morphogenesis	biological_process	6	3	519	82	18011	0.422157
GO:0008021	synaptic vesicle	cellular_component	4	3	519	82	18011	0.422157
GO:0008152	metabolic process	biological_process	3	2	519	50	18011	0.424557
GO:0007613	memory	biological_process	5	2	519	50	18011	0.424557
GO:1904646	cellular response to amyloid-beta	biological_process	9	1	519	19	18011	0.4264
GO:0004004	ATP-dependent RNA helicase activity	molecular_function	11	1	519	19	18011	0.4264
GO:0030215	semaphorin receptor binding	molecular_function	6	1	519	19	18011	0.4264
GO:0008395	steroid hydroxylase activity	molecular_function	6	1	519	19	18011	0.4264
GO:0031941	filamentous actin	cellular_component	4	1	519	19	18011	0.4264
GO:0045672	positive regulation of osteoclast differentiation	biological_process	10	1	519	19	18011	0.4264
GO:0007140	male meiotic nuclear division	biological_process	5	1	519	19	18011	0.4264
GO:0048870	cell motility	biological_process	5	1	519	19	18011	0.4264
GO:0007616	long-term memory	biological_process	6	1	519	19	18011	0.4264
GO:0004364	glutathione transferase activity	molecular_function	6	1	519	19	18011	0.4264
GO:0050718	positive regulation of interleukin-1 beta secretion	biological_process	10	1	519	19	18011	0.4264
GO:0044853	plasma membrane raft	cellular_component	7	1	519	19	18011	0.4264
GO:0050807	regulation of synapse organization	biological_process	7	1	519	19	18011	0.4264
GO:0008045	motor neuron axon guidance	biological_process	7	1	519	19	18011	0.4264
GO:0002230	positive regulation of defense response to virus by host	biological_process	9	1	519	19	18011	0.4264
GO:0007595	lactation	biological_process	8	1	519	19	18011	0.4264
GO:0003746	translation elongation factor activity	molecular_function	8	1	519	19	18011	0.4264
GO:0043153	entrainment of circadian clock by photoperiod	biological_process	8	1	519	19	18011	0.4264
GO:0001892	embryonic placenta development	biological_process	5	1	519	19	18011	0.4264
GO:0019956	chemokine binding	molecular_function	6	1	519	19	18011	0.4264
GO:0060384	innervation	biological_process	4	1	519	19	18011	0.4264
GO:0071333	cellular response to glucose stimulus	biological_process	10	1	519	19	18011	0.4264
GO:0042073	intraciliary transport	biological_process	7	1	519	19	18011	0.4264
GO:0046676	negative regulation of insulin secretion	biological_process	11	1	519	19	18011	0.4264
GO:0097228	sperm principal piece	cellular_component	5	1	519	19	18011	0.4264
GO:0001580	detection of chemical stimulus involved in sensory perception of bitter taste	biological_process	8	1	519	19	18011	0.4264
GO:0016706	2-oxoglutarate-dependent dioxygenase activity	molecular_function	6	1	519	19	18011	0.4264
GO:0001650	fibrillar center	cellular_component	7	4	519	116	18011	0.430381
GO:0005201	extracellular matrix structural constituent	molecular_function	4	2	519	51	18011	0.434481
GO:0060395	SMAD protein signal transduction	biological_process	5	2	519	51	18011	0.434481
GO:0005546	phosphatidylinositol-4,5-bisphosphate binding	molecular_function	9	2	519	51	18011	0.434481
GO:0006897	endocytosis	biological_process	7	3	519	84	18011	0.437481
GO:0006816	calcium ion transport	biological_process	10	3	519	84	18011	0.437481
GO:0070509	calcium ion import	biological_process	11	1	519	20	18011	0.442947
GO:0070006	metalloaminopeptidase activity	molecular_function	9	1	519	20	18011	0.442947
GO:0031226	intrinsic component of plasma membrane	cellular_component	5	1	519	20	18011	0.442947
GO:0017022	myosin binding	molecular_function	6	1	519	20	18011	0.442947
GO:0042738	exogenous drug catabolic process	biological_process	7	1	519	20	18011	0.442947
GO:0018149	peptide cross-linking	biological_process	9	1	519	20	18011	0.442947
GO:0031295	T cell costimulation	biological_process	5	1	519	20	18011	0.442947
GO:0070328	triglyceride homeostasis	biological_process	9	1	519	20	18011	0.442947
GO:0030574	collagen catabolic process	biological_process	5	1	519	20	18011	0.442947
GO:0007159	leukocyte cell-cell adhesion	biological_process	6	1	519	20	18011	0.442947
GO:0015701	bicarbonate transport	biological_process	9	1	519	20	18011	0.442947
GO:1905606	regulation of presynapse assembly	biological_process	7	1	519	20	18011	0.442947
GO:0008327	methyl-CpG binding	molecular_function	6	1	519	20	18011	0.442947
GO:0006471	protein ADP-ribosylation	biological_process	9	1	519	20	18011	0.442947
GO:0048593	camera-type eye morphogenesis	biological_process	8	1	519	20	18011	0.442947
GO:0043113	receptor clustering	biological_process	6	1	519	20	18011	0.442947
GO:0004864	protein phosphatase inhibitor activity	molecular_function	7	1	519	20	18011	0.442947
GO:0030170	pyridoxal phosphate binding	molecular_function	6	2	519	52	18011	0.444313
GO:0017148	negative regulation of translation	biological_process	10	2	519	52	18011	0.444313
GO:0030374	nuclear receptor transcription coactivator activity	molecular_function	6	2	519	52	18011	0.444313
GO:0042752	regulation of circadian rhythm	biological_process	5	2	519	52	18011	0.444313
GO:0004672	protein kinase activity	molecular_function	7	16	519	527	18011	0.451454
GO:0042802	identical protein binding	molecular_function	5	24	519	801	18011	0.451778
GO:0034599	cellular response to oxidative stress	biological_process	6	2	519	53	18011	0.454049
GO:0032947	protein-containing complex scaffold activity	NA	NA	2	519	53	18011	0.454049
GO:0006631	fatty acid metabolic process	biological_process	9	2	519	53	18011	0.454049
GO:0007399	nervous system development	biological_process	6	4	519	120	18011	0.456018
GO:0046718	viral entry into host cell	biological_process	9	1	519	21	18011	0.459016
GO:0030301	cholesterol transport	biological_process	9	1	519	21	18011	0.459016
GO:0005520	insulin-like growth factor binding	molecular_function	6	1	519	21	18011	0.459016
GO:0030041	actin filament polymerization	biological_process	8	1	519	21	18011	0.459016
GO:0002218	activation of innate immune response	biological_process	5	1	519	21	18011	0.459016
GO:0005922	connexin complex	cellular_component	6	1	519	21	18011	0.459016
GO:0099055	integral component of postsynaptic membrane	cellular_component	8	1	519	21	18011	0.459016
GO:0051018	protein kinase A binding	molecular_function	5	1	519	21	18011	0.459016
GO:0008023	transcription elongation factor complex	cellular_component	4	1	519	21	18011	0.459016
GO:0009653	anatomical structure morphogenesis	biological_process	4	1	519	21	18011	0.459016
GO:0070527	platelet aggregation	biological_process	7	1	519	21	18011	0.459016
GO:0005657	replication fork	cellular_component	6	1	519	21	18011	0.459016
GO:0097192	extrinsic apoptotic signaling pathway in absence of ligand	biological_process	6	1	519	21	18011	0.459016
GO:0044798	nuclear transcription factor complex	cellular_component	5	1	519	21	18011	0.459016
GO:0060170	ciliary membrane	cellular_component	6	1	519	21	18011	0.459016
GO:0032757	positive regulation of interleukin-8 production	biological_process	8	1	519	21	18011	0.459016
GO:0002027	regulation of heart rate	biological_process	9	1	519	21	18011	0.459016
GO:1900745	positive regulation of p38MAPK cascade	biological_process	13	1	519	21	18011	0.459016
GO:0043425	bHLH transcription factor binding	molecular_function	7	1	519	21	18011	0.459016
GO:0005319	lipid transporter activity	molecular_function	4	1	519	21	18011	0.459016
GO:0016209	antioxidant activity	molecular_function	3	1	519	21	18011	0.459016
GO:0019228	neuronal action potential	biological_process	7	1	519	21	18011	0.459016
GO:0019957	C-C chemokine binding	molecular_function	7	1	519	21	18011	0.459016
GO:0070382	exocytic vesicle	cellular_component	8	1	519	21	18011	0.459016
GO:0045165	cell fate commitment	biological_process	5	2	519	54	18011	0.463687
GO:0005886	plasma membrane	cellular_component	4	88	519	3014	18011	0.464191
GO:0030036	actin cytoskeleton organization	biological_process	7	4	519	122	18011	0.468694
GO:0002039	p53 binding	molecular_function	5	2	519	55	18011	0.473224
GO:0032091	negative regulation of protein binding	biological_process	7	2	519	55	18011	0.473224
GO:0001932	regulation of protein phosphorylation	biological_process	9	2	519	55	18011	0.473224
GO:0006629	lipid metabolic process	biological_process	5	6	519	191	18011	0.473433
GO:0022857	transmembrane transporter activity	molecular_function	4	5	519	157	18011	0.474323
GO:0006904	vesicle docking involved in exocytosis	biological_process	7	1	519	22	18011	0.474623
GO:0035035	histone acetyltransferase binding	molecular_function	6	1	519	22	18011	0.474623
GO:0004693	cyclin-dependent protein serine/threonine kinase activity	molecular_function	9	1	519	22	18011	0.474623
GO:0005977	glycogen metabolic process	biological_process	9	1	519	22	18011	0.474623
GO:0048018	receptor ligand activity	molecular_function	6	1	519	22	18011	0.474623
GO:0070207	protein homotrimerization	biological_process	9	1	519	22	18011	0.474623
GO:0031210	phosphatidylcholine binding	molecular_function	6	1	519	22	18011	0.474623
GO:0036297	interstrand cross-link repair	biological_process	9	1	519	22	18011	0.474623
GO:0042026	protein refolding	biological_process	5	1	519	22	18011	0.474623
GO:0098686	hippocampal mossy fiber to CA3 synapse	cellular_component	5	1	519	22	18011	0.474623
GO:0060976	coronary vasculature development	biological_process	6	1	519	22	18011	0.474623
GO:0043388	positive regulation of DNA binding	biological_process	7	1	519	22	18011	0.474623
GO:0055010	ventricular cardiac muscle tissue morphogenesis	biological_process	8	1	519	22	18011	0.474623
GO:0016493	C-C chemokine receptor activity	molecular_function	9	1	519	22	18011	0.474623
GO:0030511	positive regulation of transforming growth factor beta receptor signaling pathway	biological_process	10	1	519	22	18011	0.474623
GO:0006695	cholesterol biosynthetic process	biological_process	9	1	519	22	18011	0.474623
GO:0003950	NAD+ ADP-ribosyltransferase activity	molecular_function	7	1	519	22	18011	0.474623
GO:0004012	phospholipid-translocating ATPase activity	molecular_function	6	1	519	22	18011	0.474623
GO:0016773	phosphotransferase activity, alcohol group as acceptor	molecular_function	6	1	519	22	18011	0.474623
GO:0051233	spindle midzone	cellular_component	6	1	519	22	18011	0.474623
GO:0045746	negative regulation of Notch signaling pathway	biological_process	9	1	519	22	18011	0.474623
GO:0016477	cell migration	biological_process	6	5	519	158	18011	0.479869
GO:0007268	chemical synaptic transmission	biological_process	9	4	519	124	18011	0.481261
GO:0004713	protein tyrosine kinase activity	molecular_function	8	3	519	90	18011	0.482457
GO:0050770	regulation of axonogenesis	biological_process	9	1	519	23	18011	0.489781
GO:0042542	response to hydrogen peroxide	biological_process	7	1	519	23	18011	0.489781
GO:0044331	cell-cell adhesion mediated by cadherin	biological_process	6	1	519	23	18011	0.489781
GO:0008654	phospholipid biosynthetic process	biological_process	8	1	519	23	18011	0.489781
GO:0030148	sphingolipid biosynthetic process	biological_process	9	1	519	23	18011	0.489781
GO:0048477	oogenesis	biological_process	6	1	519	23	18011	0.489781
GO:0071158	positive regulation of cell cycle arrest	biological_process	9	1	519	23	18011	0.489781
GO:0032281	AMPA glutamate receptor complex	cellular_component	8	1	519	23	18011	0.489781
GO:0050699	WW domain binding	molecular_function	6	1	519	23	18011	0.489781
GO:0007339	binding of sperm to zona pellucida	biological_process	7	1	519	23	18011	0.489781
GO:0030331	estrogen receptor binding	molecular_function	9	1	519	23	18011	0.489781
GO:0016620	oxidoreductase activity, acting on the aldehyde or oxo group of donors, NAD or NADP as acceptor	molecular_function	6	1	519	23	18011	0.489781
GO:0001824	blastocyst development	biological_process	5	1	519	23	18011	0.489781
GO:0019897	extrinsic component of plasma membrane	cellular_component	5	1	519	23	18011	0.489781
GO:2001240	negative regulation of extrinsic apoptotic signaling pathway in absence of ligand	biological_process	10	1	519	23	18011	0.489781
GO:0005759	mitochondrial matrix	cellular_component	7	3	519	91	18011	0.489789
GO:0042803	protein homodimerization activity	molecular_function	6	18	519	609	18011	0.490292
GO:0005856	cytoskeleton	cellular_component	6	7	519	229	18011	0.490918
GO:0043433	negative regulation of DNA-binding transcription factor activity	biological_process	6	2	519	57	18011	0.491986
GO:0014068	positive regulation of phosphatidylinositol 3-kinase signaling	biological_process	10	2	519	58	18011	0.501208
GO:0072686	mitotic spindle	cellular_component	7	2	519	58	18011	0.501208
GO:0005814	centriole	cellular_component	6	3	519	93	18011	0.504299
GO:0004114	3',5'-cyclic-nucleotide phosphodiesterase activity	molecular_function	9	1	519	24	18011	0.504502
GO:0004003	ATP-dependent DNA helicase activity	molecular_function	11	1	519	24	18011	0.504502
GO:0009408	response to heat	biological_process	5	1	519	24	18011	0.504502
GO:0043029	T cell homeostasis	biological_process	6	1	519	24	18011	0.504502
GO:0045765	regulation of angiogenesis	biological_process	7	1	519	24	18011	0.504502
GO:0004181	metallocarboxypeptidase activity	molecular_function	9	1	519	24	18011	0.504502
GO:0006414	translational elongation	biological_process	8	1	519	24	18011	0.504502
GO:0071345	cellular response to cytokine stimulus	biological_process	7	1	519	24	18011	0.504502
GO:0001530	lipopolysaccharide binding	molecular_function	5	1	519	24	18011	0.504502
GO:0015459	potassium channel regulator activity	molecular_function	6	1	519	24	18011	0.504502
GO:0030134	COPII-coated ER to Golgi transport vesicle	cellular_component	8	1	519	24	18011	0.504502
GO:0006749	glutathione metabolic process	biological_process	8	1	519	24	18011	0.504502
GO:0017157	regulation of exocytosis	biological_process	7	1	519	24	18011	0.504502
GO:0042056	chemoattractant activity	molecular_function	7	1	519	24	18011	0.504502
GO:0048661	positive regulation of smooth muscle cell proliferation	biological_process	8	1	519	24	18011	0.504502
GO:0007214	gamma-aminobutyric acid signaling pathway	biological_process	6	1	519	24	18011	0.504502
GO:0045739	positive regulation of DNA repair	biological_process	10	1	519	24	18011	0.504502
GO:0048843	negative regulation of axon extension involved in axon guidance	biological_process	9	1	519	24	18011	0.504502
GO:0055072	iron ion homeostasis	biological_process	11	1	519	24	18011	0.504502
GO:0034332	adherens junction organization	biological_process	6	1	519	24	18011	0.504502
GO:0040008	regulation of growth	biological_process	5	1	519	24	18011	0.504502
GO:0031016	pancreas development	biological_process	6	1	519	24	18011	0.504502
GO:0046835	carbohydrate phosphorylation	biological_process	8	1	519	24	18011	0.504502
GO:0045499	chemorepellent activity	molecular_function	7	1	519	24	18011	0.504502
GO:0000209	protein polyubiquitination	biological_process	12	3	519	94	18011	0.511473
GO:0043025	neuronal cell body	cellular_component	5	5	519	164	18011	0.512701
GO:0006974	cellular response to DNA damage stimulus	biological_process	6	7	519	234	18011	0.513722
GO:0014069	postsynaptic density	cellular_component	5	4	519	130	18011	0.518218
GO:0098664	G protein-coupled serotonin receptor signaling pathway	biological_process	6	1	519	25	18011	0.518799
GO:0051537	2 iron, 2 sulfur cluster binding	molecular_function	6	1	519	25	18011	0.518799
GO:0048008	platelet-derived growth factor receptor signaling pathway	biological_process	8	1	519	25	18011	0.518799
GO:0055088	lipid homeostasis	biological_process	7	1	519	25	18011	0.518799
GO:0048786	presynaptic active zone	cellular_component	4	1	519	25	18011	0.518799
GO:0030001	metal ion transport	biological_process	8	1	519	25	18011	0.518799
GO:0002286	T cell activation involved in immune response	biological_process	8	1	519	25	18011	0.518799
GO:0006694	steroid biosynthetic process	biological_process	7	1	519	25	18011	0.518799
GO:0007528	neuromuscular junction development	biological_process	6	1	519	25	18011	0.518799
GO:0010942	positive regulation of cell death	biological_process	7	1	519	25	18011	0.518799
GO:0016342	catenin complex	cellular_component	6	1	519	25	18011	0.518799
GO:0045648	positive regulation of erythrocyte differentiation	biological_process	9	1	519	25	18011	0.518799
GO:0034451	centriolar satellite	cellular_component	7	1	519	25	18011	0.518799
GO:0006821	chloride transport	biological_process	9	2	519	60	18011	0.519324
GO:0042632	cholesterol homeostasis	biological_process	9	2	519	60	18011	0.519324
GO:0042593	glucose homeostasis	biological_process	8	3	519	96	18011	0.525656
GO:0016740	transferase activity	molecular_function	4	24	519	832	18011	0.528105
GO:0043197	dendritic spine	cellular_component	7	2	519	61	18011	0.528217
GO:0007601	visual perception	biological_process	8	3	519	97	18011	0.532662
GO:0043204	perikaryon	cellular_component	5	1	519	26	18011	0.532685
GO:0003281	ventricular septum development	biological_process	6	1	519	26	18011	0.532685
GO:0048487	beta-tubulin binding	molecular_function	7	1	519	26	18011	0.532685
GO:0006513	protein monoubiquitination	biological_process	12	1	519	26	18011	0.532685
GO:0009409	response to cold	biological_process	5	1	519	26	18011	0.532685
GO:0044255	cellular lipid metabolic process	biological_process	6	1	519	26	18011	0.532685
GO:0030073	insulin secretion	biological_process	11	1	519	26	18011	0.532685
GO:0097730	non-motile cilium	cellular_component	5	1	519	26	18011	0.532685
GO:0016529	sarcoplasmic reticulum	cellular_component	7	1	519	26	18011	0.532685
GO:0016339	calcium-dependent cell-cell adhesion via plasma membrane cell adhesion molecules	biological_process	7	1	519	26	18011	0.532685
GO:0001654	eye development	biological_process	7	1	519	26	18011	0.532685
GO:0048856	anatomical structure development	biological_process	4	1	519	26	18011	0.532685
GO:0045595	regulation of cell differentiation	biological_process	6	1	519	26	18011	0.532685
GO:0001974	blood vessel remodeling	biological_process	5	1	519	26	18011	0.532685
GO:0016925	protein sumoylation	biological_process	11	1	519	26	18011	0.532685
GO:0005154	epidermal growth factor receptor binding	molecular_function	7	1	519	26	18011	0.532685
GO:0061844	antimicrobial humoral immune response mediated by antimicrobial peptide	biological_process	7	1	519	26	18011	0.532685
GO:0005484	SNAP receptor activity	molecular_function	5	1	519	26	18011	0.532685
GO:0050804	modulation of chemical synaptic transmission	biological_process	8	2	519	62	18011	0.536997
GO:0030182	neuron differentiation	biological_process	6	3	519	98	18011	0.539609
GO:0016310	phosphorylation	biological_process	7	11	519	382	18011	0.544052
GO:0016525	negative regulation of angiogenesis	biological_process	8	2	519	63	18011	0.545664
GO:0004197	cysteine-type endopeptidase activity	molecular_function	8	2	519	63	18011	0.545664
GO:0006887	exocytosis	biological_process	7	2	519	63	18011	0.545664
GO:0038083	peptidyl-tyrosine autophosphorylation	biological_process	11	1	519	27	18011	0.54617
GO:0009749	response to glucose	biological_process	9	1	519	27	18011	0.54617
GO:0007088	regulation of mitotic nuclear division	biological_process	8	1	519	27	18011	0.54617
GO:0000307	cyclin-dependent protein kinase holoenzyme complex	cellular_component	5	1	519	27	18011	0.54617
GO:0007566	embryo implantation	biological_process	4	1	519	27	18011	0.54617
GO:0008137	NADH dehydrogenase (ubiquinone) activity	molecular_function	8	1	519	27	18011	0.54617
GO:0014704	intercalated disc	cellular_component	6	1	519	27	18011	0.54617
GO:0030295	protein kinase activator activity	molecular_function	7	1	519	27	18011	0.54617
GO:0051592	response to calcium ion	biological_process	7	1	519	27	18011	0.54617
GO:0045880	positive regulation of smoothened signaling pathway	biological_process	9	1	519	27	18011	0.54617
GO:0014065	phosphatidylinositol 3-kinase signaling	biological_process	8	1	519	27	18011	0.54617
GO:0005921	gap junction	cellular_component	5	1	519	27	18011	0.54617
GO:0000987	proximal promoter sequence-specific DNA binding	molecular_function	9	1	519	27	18011	0.54617
GO:0043231	intracellular membrane-bounded organelle	cellular_component	5	16	519	560	18011	0.550157
GO:0090090	negative regulation of canonical Wnt signaling pathway	biological_process	10	3	519	100	18011	0.553323
GO:0010507	negative regulation of autophagy	biological_process	9	1	519	28	18011	0.559267
GO:0032154	cleavage furrow	cellular_component	5	1	519	28	18011	0.559267
GO:0042130	negative regulation of T cell proliferation	biological_process	11	1	519	28	18011	0.559267
GO:0048813	dendrite morphogenesis	biological_process	9	1	519	28	18011	0.559267
GO:0008528	G protein-coupled peptide receptor activity	molecular_function	6	1	519	28	18011	0.559267
GO:0050796	regulation of insulin secretion	biological_process	10	1	519	28	18011	0.559267
GO:1902895	positive regulation of pri-miRNA transcription by RNA polymerase II	biological_process	11	1	519	28	18011	0.559267
[truncated: 419 more rows]
