# Supplementary material for: Mechanisms of Oogenesis-Related Long Non-coding RNAs in Porcine Ovaries Treated With Recombinant Pig Follicle-Stimulating Hormone
Source: Front Vet Sci. 2022 Feb 24;8:838703. doi: 10.3389/fvets.2021.838703 (PMC8908959; doi:10.3389/fvets.2021.838703)
Supplement: Supplementary file 7 [file Table_7.XLSX]

## Sheet: Sheet1
Supplymentary Table-S7 KEGG pathways analysis of differentially mRNAs expression.
pathway_id	pathway_name	S gene number	TS gene number	B gene number	TB gene number	pvalue
ko00120	Primary bile acid biosynthesis	4	190	17	6820	0.00104482
ko05160	Hepatitis C	11	190	138	6820	0.00155031
ko00830	Retinol metabolism	6	190	48	6820	0.00200191
ko00140	Steroid hormone biosynthesis	5	190	41	6820	0.00528523
ko04976	Bile secretion	6	190	66	6820	0.00981507
ko04530	Tight junction	10	190	156	6820	0.0115517
ko00230	Purine metabolism	8	190	124	6820	0.0220749
ko04020	Calcium signaling pathway	10	190	175	6820	0.0239894
ko00920	Sulfur metabolism	2	190	9	6820	0.0244339
ko04622	RIG-I-like receptor signaling pathway	5	190	60	6820	0.0252445
ko04146	Peroxisome	6	190	82	6820	0.0263118
ko00650	Butanoate metabolism	3	190	24	6820	0.0280141
ko05016	Huntington disease	10	190	182	6820	0.030401
ko05032	Morphine addiction	6	190	86	6820	0.0322809
ko01040	Biosynthesis of unsaturated fatty acids	3	190	26	6820	0.0345634
ko04971	Gastric acid secretion	5	190	69	6820	0.0426154
ko05164	Influenza A	8	190	141	6820	0.0427799
ko04750	Inflammatory mediator regulation of TRP channels	6	190	93	6820	0.0447176
ko04918	Thyroid hormone synthesis	5	190	70	6820	0.0448988
ko04970	Salivary secretion	5	190	71	6820	0.0472543
ko04080	Neuroactive ligand-receptor interaction	14	190	311	6820	0.0513387
ko00500	Starch and sucrose metabolism	3	190	32	6820	0.0584618
ko00983	Drug metabolism - other enzymes	4	190	53	6820	0.0593581
ko04960	Aldosterone-regulated sodium reabsorption	3	190	34	6820	0.0677755
ko04911	Insulin secretion	5	190	80	6820	0.0717057
ko00910	Nitrogen metabolism	2	190	16	6820	0.0717402
ko04060	Cytokine-cytokine receptor interaction	11	190	242	6820	0.0746354
ko00982	Drug metabolism - cytochrome P450	3	190	39	6820	0.0937446
ko00770	Pantothenate and CoA biosynthesis	2	190	19	6820	0.0968824
ko00040	Pentose and glucuronate interconversions	2	190	19	6820	0.0968824
ko04972	Pancreatic secretion	5	190	88	6820	0.098278
ko04742	Taste transduction	4	190	64	6820	0.102307
ko02010	ABC transporters	3	190	41	6820	0.105121
ko05169	Epstein-Barr virus infection	8	190	175	6820	0.114924
ko04115	p53 signaling pathway	4	190	67	6820	0.115966
ko04913	Ovarian steroidogenesis	3	190	43	6820	0.11701
ko04390	Hippo signaling pathway	7	190	149	6820	0.121737
ko05162	Measles	6	190	122	6820	0.124575
ko04310	Wnt signaling pathway	7	190	150	6820	0.12487
ko00524	Neomycin, kanamycin and gentamicin biosynthesis	1	190	5	6820	0.131785
ko00591	Linoleic acid metabolism	2	190	23	6820	0.133515
ko03320	PPAR signaling pathway	4	190	71	6820	0.135341
ko04979	Cholesterol metabolism	3	190	46	6820	0.135726
ko00480	Glutathione metabolism	3	190	47	6820	0.142182
ko00601	Glycosphingolipid biosynthesis - lacto and neolacto series	2	190	24	6820	0.143106
ko04512	ECM-receptor interaction	4	190	74	6820	0.150677
ko05204	Chemical carcinogenesis	3	190	49	6820	0.15539
ko05202	Transcriptional misregulation in cancer	7	190	160	6820	0.158394
ko04974	Protein digestion and absorption	4	190	76	6820	0.161256
ko04950	Maturity onset diabetes of the young	2	190	26	6820	0.162693
ko04392	Hippo signaling pathway - multiple species	2	190	27	6820	0.17266
ko04122	Sulfur relay system	1	190	7	6820	0.179524
ko00750	Vitamin B6 metabolism	1	190	7	6820	0.179524
ko00860	Porphyrin and chlorophyll metabolism	2	190	28	6820	0.182724
ko04623	Cytosolic DNA-sensing pathway	3	190	53	6820	0.18287
ko00240	Pyrimidine metabolism	3	190	53	6820	0.18287
ko04024	cAMP signaling pathway	8	190	198	6820	0.18709
ko04012	ErbB signaling pathway	4	190	81	6820	0.188817
ko00760	Nicotinate and nicotinamide metabolism	2	190	29	6820	0.192871
ko04540	Gap junction	4	190	82	6820	0.194504
ko00590	Arachidonic acid metabolism	3	190	55	6820	0.197068
ko00740	Riboflavin metabolism	1	190	8	6820	0.202406
ko04710	Circadian rhythm	2	190	30	6820	0.20309
ko00630	Glyoxylate and dicarboxylate metabolism	2	190	30	6820	0.20309
ko04215	Apoptosis - multiple species	2	190	30	6820	0.20309
ko04727	GABAergic synapse	4	190	84	6820	0.206034
ko00072	Synthesis and degradation of ketone bodies	1	190	9	6820	0.224652
ko04728	Dopaminergic synapse	5	190	120	6820	0.242431
ko05143	African trypanosomiasis	2	190	34	6820	0.244454
ko04713	Circadian entrainment	4	190	91	6820	0.247807
ko04925	Aldosterone synthesis and secretion	4	190	91	6820	0.247807
ko04915	Estrogen signaling pathway	5	190	122	6820	0.252922
ko05216	Thyroid cancer	2	190	36	6820	0.265285
ko04066	HIF-1 signaling pathway	4	190	94	6820	0.266255
ko00430	Taurine and hypotaurine metabolism	1	190	11	6820	0.26731
ko04270	Vascular smooth muscle contraction	5	190	126	6820	0.27423
ko05219	Bladder cancer	2	190	38	6820	0.28612
ko04924	Renin secretion	3	190	67	6820	0.286512
ko04261	Adrenergic signaling in cardiomyocytes	5	190	131	6820	0.301368
ko04917	Prolactin signaling pathway	3	190	69	6820	0.301833
ko04672	Intestinal immune network for IgA production	2	190	40	6820	0.306895
ko00730	Thiamine metabolism	1	190	13	6820	0.307633
ko05206	MicroRNAs in cancer	5	190	133	6820	0.312345
ko04928	Parathyroid hormone synthesis, secretion and action	4	190	102	6820	0.316499
ko05100	Bacterial invasion of epithelial cells	3	190	71	6820	0.317194
ko05165	Human papillomavirus infection	10	190	299	6820	0.321751
ko04726	Serotonergic synapse	4	190	103	6820	0.322851
ko00603	Glycosphingolipid biosynthesis - globo and isoglobo series	1	190	14	6820	0.326958
ko00980	Metabolism of xenobiotics by cytochrome P450	2	190	42	6820	0.327555
ko04670	Leukocyte transendothelial migration	4	190	104	6820	0.329212
ko04930	Type II diabetes mellitus	2	190	43	6820	0.337825
ko00380	Tryptophan metabolism	2	190	43	6820	0.337825
ko00053	Ascorbate and aldarate metabolism	1	190	15	6820	0.345747
ko04724	Glutamatergic synapse	4	190	107	6820	0.348333
ko04723	Retrograde endocannabinoid signaling	5	190	141	6820	0.356703
ko04666	Fc gamma R-mediated phagocytosis	3	190	77	6820	0.363267
ko00450	Selenocompound metabolism	1	190	16	6820	0.364015
ko04630	Jak-STAT signaling pathway	5	190	144	6820	0.373433
ko04657	IL-17 signaling pathway	3	190	80	6820	0.386156
ko04071	Sphingolipid signaling pathway	4	190	113	6820	0.386588
ko04510	Focal adhesion	6	190	180	6820	0.386596
ko00510	N-Glycan biosynthesis	2	190	48	6820	0.388368
ko04152	AMPK signaling pathway	4	190	114	6820	0.392946
ko04151	PI3K-Akt signaling pathway	10	190	319	6820	0.397019
ko00280	Valine, leucine and isoleucine degradation	2	190	49	6820	0.398282
ko00531	Glycosaminoglycan degradation	1	190	18	6820	0.399041
ko04914	Progesterone-mediated oocyte maturation	3	190	82	6820	0.401312
ko05161	Hepatitis B	5	190	151	6820	0.412433
ko00220	Arginine biosynthesis	1	190	19	6820	0.415827
ko04912	GnRH signaling pathway	3	190	85	6820	0.423845
ko01522	Endocrine resistance	3	190	86	6820	0.431294
ko04620	Toll-like receptor signaling pathway	3	190	86	6820	0.431294
ko04614	Renin-angiotensin system	1	190	20	6820	0.432147
ko00900	Terpenoid backbone biosynthesis	1	190	21	6820	0.448014
ko04015	Rap1 signaling pathway	6	190	195	6820	0.46156
ko04977	Vitamin digestion and absorption	1	190	22	6820	0.463439
ko00340	Histidine metabolism	1	190	22	6820	0.463439
ko05215	Prostate cancer	3	190	91	6820	0.467986
ko04514	Cell adhesion molecules (CAMs)	4	190	127	6820	0.474244
ko04210	Apoptosis	4	190	127	6820	0.474244
ko05213	Endometrial cancer	2	190	57	6820	0.474646
ko00514	Other types of O-glycan biosynthesis	1	190	23	6820	0.478436
ko00010	Glycolysis / Gluconeogenesis	2	190	60	6820	0.501758
ko04621	NOD-like receptor signaling pathway	4	190	133	6820	0.510438
ko04916	Melanogenesis	3	190	97	6820	0.510581
ko04659	Th17 cell differentiation	3	190	97	6820	0.510581
ko05031	Amphetamine addiction	2	190	61	6820	0.510594
ko04062	Chemokine signaling pathway	5	190	170	6820	0.515626
ko04668	TNF signaling pathway	3	190	98	6820	0.517508
ko04650	Natural killer cell mediated cytotoxicity	3	190	98	6820	0.517508
ko05217	Basal cell carcinoma	2	190	62	6820	0.519328
ko05223	Non-small cell lung cancer	2	190	62	6820	0.519328
ko04720	Long-term potentiation	2	190	62	6820	0.519328
ko04966	Collecting duct acid secretion	1	190	26	6820	0.520969
ko05332	Graft-versus-host disease	1	190	26	6820	0.520969
ko00512	Mucin type O-glycan biosynthesis	1	190	27	6820	0.534366
ko00640	Propanoate metabolism	1	190	29	6820	0.560051
ko05218	Melanoma	2	190	67	6820	0.561424
ko04920	Adipocytokine signaling pathway	2	190	67	6820	0.561424
ko05412	Arrhythmogenic right ventricular cardiomyopathy (ARVC)	2	190	67	6820	0.561424
ko04921	Oxytocin signaling pathway	4	190	142	6820	0.562517
ko00052	Galactose metabolism	1	190	30	6820	0.57236
ko05330	Allograft rejection	1	190	30	6820	0.57236
ko00410	beta-Alanine metabolism	1	190	30	6820	0.57236
ko04931	Insulin resistance	3	190	107	6820	0.577377
ko05214	Glioma	2	190	69	6820	0.577513
ko05132	Salmonella infection	2	190	69	6820	0.577513
ko04520	Adherens junction	2	190	69	6820	0.577513
ko04725	Cholinergic synapse	3	190	108	6820	0.583739
ko00350	Tyrosine metabolism	1	190	31	6820	0.584326
ko04130	SNARE interactions in vesicular transport	1	190	31	6820	0.584326
ko05212	Pancreatic cancer	2	190	71	6820	0.593169
ko00051	Fructose and mannose metabolism	1	190	32	6820	0.595959
ko05200	Pathways in cancer	13	190	485	6820	0.599995
ko05205	Proteoglycans in cancer	5	190	188	6820	0.605929
ko00250	Alanine, aspartate and glutamate metabolism	1	190	34	6820	0.618263
ko05225	Hepatocellular carcinoma	4	190	153	6820	0.621888
ko05033	Nicotine addiction	1	190	35	6820	0.628951
ko04022	cGMP-PKG signaling pathway	4	190	156	6820	0.637181
ko04940	Type I diabetes mellitus	1	190	36	6820	0.639342
ko00620	Pyruvate metabolism	1	190	36	6820	0.639342
ko05323	Rheumatoid arthritis	2	190	78	6820	0.644552
ko00260	Glycine, serine and threonine metabolism	1	190	37	6820	0.649443
ko04973	Carbohydrate digestion and absorption	1	190	38	6820	0.659262
ko05320	Autoimmune thyroid disease	1	190	38	6820	0.659262
ko04640	Hematopoietic cell lineage	2	190	81	6820	0.66496
ko05167	Kaposi sarcoma-associated herpesvirus infection	4	190	163	6820	0.671291
ko04926	Relaxin signaling pathway	3	190	123	6820	0.671681
ko05166	Human T-cell leukemia virus 1 infection	5	190	203	6820	0.673385
ko00071	Fatty acid degradation	1	190	40	6820	0.678088
ko04216	Ferroptosis	1	190	40	6820	0.678088
ko05222	Small cell lung cancer	2	190	84	6820	0.68442
ko04064	NF-kappa B signaling pathway	2	190	84	6820	0.68442
ko05210	Colorectal cancer	2	190	85	6820	0.690699
ko04961	Endocrine and other factor-regulated calcium reabsorption	1	190	42	6820	0.695879
ko05146	Amoebiasis	2	190	86	6820	0.696875
ko04145	Phagosome	3	190	130	6820	0.707807
ko04910	Insulin signaling pathway	3	190	130	6820	0.707807
ko00270	Cysteine and methionine metabolism	1	190	44	6820	0.712691
ko05030	Cocaine addiction	1	190	44	6820	0.712691
ko04340	Hedgehog signaling pathway	1	190	44	6820	0.712691
ko05144	Malaria	1	190	46	6820	0.728579
ko00330	Arginine and proline metabolism	1	190	46	6820	0.728579
ko00600	Sphingolipid metabolism	1	190	47	6820	0.736192
ko05231	Choline metabolism in cancer	2	190	93	6820	0.737309
ko00520	Amino sugar and nucleotide sugar metabolism	1	190	48	6820	0.743592
ko04070	Phosphatidylinositol signaling system	2	190	95	6820	0.747989
ko03460	Fanconi anemia pathway	1	190	49	6820	0.750786
ko05416	Viral myocarditis	1	190	49	6820	0.750786
ko05145	Toxoplasmosis	2	190	98	6820	0.763312
ko05226	Gastric cancer	3	190	143	6820	0.766732
ko04923	Regulation of lipolysis in adipocytes	1	190	52	6820	0.771185
ko05142	Chagas disease (American trypanosomiasis)	2	190	100	6820	0.773076
ko04370	VEGF signaling pathway	1	190	53	6820	0.777609
ko04150	mTOR signaling pathway	3	190	147	6820	0.782811
ko04010	MAPK signaling pathway	6	190	275	6820	0.78525
ko00310	Lysine degradation	1	190	56	6820	0.795823
ko04213	Longevity regulating pathway - multiple species	1	190	56	6820	0.795823
ko05321	Inflammatory bowel disease (IBD)	1	190	56	6820	0.795823
ko04730	Long-term depression	1	190	57	6820	0.801558
ko05230	Central carbon metabolism in cancer	1	190	58	6820	0.807133
ko00561	Glycerolipid metabolism	1	190	58	6820	0.807133
ko04919	Thyroid hormone signaling pathway	2	190	108	6820	0.808707
ko04380	Osteoclast differentiation	2	190	109	6820	0.812795
ko04664	Fc epsilon RI signaling pathway	1	190	61	6820	0.822941
ko04137	Mitophagy - animal	1	190	61	6820	0.822941
ko04927	Cortisol synthesis and secretion	1	190	62	6820	0.827918
ko04722	Neurotrophin signaling pathway	2	190	114	6820	0.832088
ko04142	Lysosome	2	190	114	6820	0.832088
ko01524	Platinum drug resistance	1	190	63	6820	0.832756
ko05203	Viral carcinogenesis	3	190	162	6820	0.835174
ko04662	B cell receptor signaling pathway	1	190	64	6820	0.837459
ko04110	Cell cycle	2	190	116	6820	0.839292
ko04611	Platelet activation	2	190	117	6820	0.842789
ko05211	Renal cell carcinoma	1	190	66	6820	0.846473
ko05133	Pertussis	1	190	68	6820	0.85499
ko05168	Herpes simplex virus 1 infection	6	190	304	6820	0.857716
ko05418	Fluid shear stress and atherosclerosis	2	190	123	6820	0.862365
ko04610	Complement and coagulation cascades	1	190	70	6820	0.863037
ko00562	Inositol phosphate metabolism	1	190	71	6820	0.866892
ko04260	Cardiac muscle contraction	1	190	72	6820	0.87064
ko04360	Axon guidance	3	190	176	6820	0.873915
ko04550	Signaling pathways regulating pluripotency of stem cells	2	190	127	6820	0.874154
ko04068	FoxO signaling pathway	2	190	127	6820	0.874154
ko05220	Chronic myeloid leukemia	1	190	73	6820	0.874282
ko04371	Apelin signaling pathway	2	190	128	6820	0.876953
ko04120	Ubiquitin mediated proteolysis	2	190	129	6820	0.879695
ko04721	Synaptic vesicle cycle	1	190	75	6820	0.881263
ko03018	RNA degradation	1	190	75	6820	0.881263
ko01521	EGFR tyrosine kinase inhibitor resistance	1	190	76	6820	0.884608
ko04217	Necroptosis	2	190	135	6820	0.895001
ko05414	Dilated cardiomyopathy (DCM)	1	190	81	6820	0.899977
ko03015	mRNA surveillance pathway	1	190	81	6820	0.899977
ko04658	Th1 and Th2 cell differentiation	1	190	81	6820	0.899977
ko05170	Human immunodeficiency virus 1 infection	3	190	189	6820	0.902477
ko05224	Breast cancer	2	190	139	6820	0.904181
ko04211	Longevity regulating pathway	1	190	84	6820	0.908202
ko04072	Phospholipase D signaling pathway	2	190	141	6820	0.908487
ko04218	Cellular senescence	2	190	143	6820	0.912612
ko04932	Non-alcoholic fatty liver disease (NAFLD)	2	190	144	6820	0.914609
ko00564	Glycerophospholipid metabolism	1	190	89	6820	0.920442
ko04922	Glucagon signaling pathway	1	190	89	6820	0.920442
ko04350	TGF-beta signaling pathway	1	190	89	6820	0.920442
ko04934	Cushing syndrome	2	190	148	6820	0.922177
ko05163	Human cytomegalovirus infection	3	190	203	6820	0.926621
ko04933	AGE-RAGE signaling pathway in diabetic complications	1	190	94	6820	0.931057
ko04141	Protein processing in endoplasmic reticulum	2	190	154	6820	0.93236
ko04625	C-type lectin receptor signaling pathway	1	190	95	6820	0.933005
ko05010	Alzheimer disease	2	190	163	6820	0.94531
ko04014	Ras signaling pathway	3	190	219	6820	0.94746
ko04114	Oocyte meiosis	1	190	108	6820	0.953859
ko04140	Autophagy - animal	1	190	123	6820	0.97002
ko05034	Alcoholism	1	190	128	6820	0.97404
ko04810	Regulation of actin cytoskeleton	2	190	194	6820	0.974154
ko00190	Oxidative phosphorylation	1	190	130	6820	0.975493
ko05012	Parkinson disease	1	190	140	6820	0.981631
ko05152	Tuberculosis	1	190	151	6820	0.98663
ko04144	Endocytosis	2	190	225	6820	0.98806
ko04714	Thermogenesis	1	190	223	6820	0.99835
ko04740	Olfactory transduction	1	190	596	6820	1
