# Supplementary material for: Mechanisms of Oogenesis-Related Long Non-coding RNAs in Porcine Ovaries Treated With Recombinant Pig Follicle-Stimulating Hormone
Source: Front Vet Sci. 2022 Feb 24;8:838703. doi: 10.3389/fvets.2021.838703 (PMC8908959; doi:10.3389/fvets.2021.838703)
Supplement: Supplementary file 8 [file Table_8.XLSX]

## Sheet: Sheet1
Supplymentary Table-S8 lncRNAs-mRNAs significantly correlated pairs.
mRNA			lncRNA
transcript_name	gene_id	gene_name	transcript_name	gene_id	gene_name	Pearson Correlation Coefficient
ENSSSCT00000014488	MSTRG.17679	PHF21A	MSTRG.17680.1	MSTRG.17680	PHF21A	-0.246597
ENSSSCT00000023373	MSTRG.17679	PHF21A	MSTRG.17680.1	MSTRG.17680	PHF21A	0.227012
ENSSSCT00000007339	MSTRG.23826	ENSSSCG00000033862	MSTRG.23824.1	MSTRG.23824	.	0.999802
ENSSSCT00000007339	MSTRG.23826	ENSSSCG00000033862	MSTRG.23822.3	MSTRG.23822	ENSSSCG00000035936	0.995982
ENSSSCT00000009670	MSTRG.32597	SPATA18	MSTRG.32597.3	MSTRG.32597	SPATA18	0.991797
ENSSSCT00000007339	MSTRG.23826	ENSSSCG00000033862	MSTRG.23830.1	MSTRG.23830	.	0.99977
ENSSSCT00000016385	MSTRG.34387	C11orf88	MSTRG.34390.1	MSTRG.34390	BTG4	0.994725
ENSSSCT00000055629	MSTRG.15830	ENSSSCG00000007314	MSTRG.15831.1	MSTRG.15831	.	-0.243306
ENSSSCT00000055629	MSTRG.15830	ENSSSCG00000007314	MSTRG.15831.2	MSTRG.15831	.	-0.232687
ENSSSCT00000045547	MSTRG.5617	ACTG1	MSTRG.5618.1	MSTRG.5618	ACTG1	-0.401251
ENSSSCT00000029218	MSTRG.16789	DOCK4	MSTRG.16790.2	MSTRG.16790	DOCK4	0.999993
ENSSSCT00000007339	MSTRG.23826	ENSSSCG00000033862	MSTRG.23823.1	MSTRG.23823	.	0.999744
ENSSSCT00000017534	MSTRG.13783	TRAK2	MSTRG.13782.1	MSTRG.13782	ALS2CR12	-0.336693
ENSSSCT00000024231	MSTRG.13780	CASP8	MSTRG.13782.1	MSTRG.13782	ALS2CR12	0.114606
ENSSSCT00000017535	MSTRG.13781	ALS2CR12	MSTRG.13782.1	MSTRG.13782	ALS2CR12	0.997278
ENSSSCT00000007339	MSTRG.23826	ENSSSCG00000033862	MSTRG.23825.1	MSTRG.23825	.	0.999756
ENSSSCT00000011042	MSTRG.11131	MAPK1	MSTRG.11132.1	MSTRG.11132	MAPK1	-0.336041
ENSSSCT00000034964	MSTRG.11131	MAPK1	MSTRG.11132.1	MSTRG.11132	MAPK1	-0.238092
ENSSSCT00000005485	MSTRG.2095	UACA	MSTRG.2096.1	MSTRG.2096	UACA	-0.462525
ENSSSCT00000007339	MSTRG.23826	ENSSSCG00000033862	MSTRG.23828.1	MSTRG.23828	.	0.999724
ENSSSCT00000012849	MSTRG.8934	WDR49	MSTRG.8936.1	MSTRG.8936	WDR49	0.999879
ENSSSCT00000047998	MSTRG.35155	PTPN12	MSTRG.35153.4	MSTRG.35153	ENSSSCG00000031818	0.24627
ENSSSCT00000049763	MSTRG.10846	RPLP0	MSTRG.10847.1	MSTRG.10847	GCN1	0.992726
ENSSSCT00000053865	MSTRG.33691	THAP9	MSTRG.33695.1	MSTRG.33695	SEC31A	-0.325134
ENSSSCT00000007339	MSTRG.23826	ENSSSCG00000033862	MSTRG.23829.1	MSTRG.23829	.	0.999773
ENSSSCT00000015551	MSTRG.19484	ENSSSCG00000014233	MSTRG.19486.1	MSTRG.19486	.	0.994647
ENSSSCT00000043976	MSTRG.15747	RALY	MSTRG.15745.1	MSTRG.15745	RALY	-0.244175
ENSSSCT00000054594	MSTRG.14086	SPHKAP	MSTRG.14079.1	MSTRG.14079	DAW1	0.647679
ENSSSCT00000065098	MSTRG.14086	SPHKAP	MSTRG.14079.1	MSTRG.14079	DAW1	0.721341
ENSSSCT00000017700	MSTRG.14077	DAW1	MSTRG.14079.1	MSTRG.14079	DAW1	0.926801
ENSSSCT00000001927	MSTRG.30764	PLA2G7	MSTRG.30762.1	MSTRG.30762	PLA2G7	-0.305121
ENSSSCT00000007339	MSTRG.23826	ENSSSCG00000033862	MSTRG.23822.2	MSTRG.23822	ENSSSCG00000035936	0.999331
ENSSSCT00000063969	MSTRG.30736	CLIC5	MSTRG.30735.1	MSTRG.30735	.	0.996181
ENSSSCT00000064670	MSTRG.3904	NR5A2	MSTRG.3902.1	MSTRG.3902	NR5A2	0.939798
ENSSSCT00000040346	MSTRG.8692	PXYLP1	MSTRG.8684.1	MSTRG.8684	.	-0.207413
ENSSSCT00000052040	MSTRG.26161	MGAT4C	MSTRG.26157.1	MSTRG.26157	.	0.754919
ENSSSCT00000015551	MSTRG.19484	ENSSSCG00000014233	MSTRG.19485.1	MSTRG.19485	.	0.982636
ENSSSCT00000004265	MSTRG.29546	SCP2	MSTRG.29550.1	MSTRG.29550	SCP2	0.999503
ENSSSCT00000049942	MSTRG.23501	CFAP45	MSTRG.23503.1	MSTRG.23503	CFAP45	0.991001
ENSSSCT00000007007	MSTRG.23501	CFAP45	MSTRG.23503.1	MSTRG.23503	CFAP45	0.994507
ENSSSCT00000005749	MSTRG.2607	ENSSSCG00000005216	MSTRG.2608.1	MSTRG.2608	ENSSSCG00000040584	0.999325
ENSSSCT00000046557	MSTRG.5539	CDC16	MSTRG.5535.1	MSTRG.5535	.	0.345965
ENSSSCT00000016385	MSTRG.34387	C11orf88	MSTRG.34391.1	MSTRG.34391	C11orf88	0.99724
ENSSSCT00000024462	MSTRG.20357	EIF4H	MSTRG.20357.1	MSTRG.20357	EIF4H	0.852565
ENSSSCT00000015551	MSTRG.19484	ENSSSCG00000014233	MSTRG.19487.1	MSTRG.19487	.	0.97608
ENSSSCT00000049942	MSTRG.23501	CFAP45	MSTRG.23502.1	MSTRG.23502	CFAP45	0.996696
ENSSSCT00000007007	MSTRG.23501	CFAP45	MSTRG.23502.1	MSTRG.23502	CFAP45	0.990726
ENSSSCT00000035214	MSTRG.30498	DEF6	MSTRG.30495.3	MSTRG.30495	SCUBE3	0.907221
ENSSSCT00000003886	MSTRG.28318	UBXN10	MSTRG.28317.1	MSTRG.28317	.	0.943187
ENSSSCT00000040346	MSTRG.8692	PXYLP1	MSTRG.8685.1	MSTRG.8685	.	-0.202119
ENSSSCT00000004583	MSTRG.415	ECT2L	MSTRG.416.1	MSTRG.416	ECT2L	0.949705
ENSSSCT00000017272	MSTRG.13273	WDR33	MSTRG.13275.2	MSTRG.13275	WDR33	-0.297002
ENSSSCT00000014488	MSTRG.17679	PHF21A	MSTRG.17683.2	MSTRG.17683	PHF21A	-0.200759
ENSSSCT00000023373	MSTRG.17679	PHF21A	MSTRG.17683.2	MSTRG.17683	PHF21A	-0.110636
ENSSSCT00000012283	MSTRG.7470	NEK10	MSTRG.7472.1	MSTRG.7472	NEK10	0.998258
ENSSSCT00000019461	MSTRG.6910	TEKT1	MSTRG.6911.1	MSTRG.6911	TEKT1	0.995653
ENSSSCT00000055293	MSTRG.6910	TEKT1	MSTRG.6911.1	MSTRG.6911	TEKT1	0.989882
ENSSSCT00000019462	MSTRG.6913	SMTNL2	MSTRG.6911.1	MSTRG.6911	TEKT1	0.997053
ENSSSCT00000023744	MSTRG.8893	RARRES1	MSTRG.8894.1	MSTRG.8894	RARRES1	0.938011
ENSSSCT00000052040	MSTRG.26161	MGAT4C	MSTRG.26158.1	MSTRG.26158	.	0.790886
ENSSSCT00000028505	MSTRG.7748	ALS2CL	MSTRG.7747.1	MSTRG.7747	.	0.535623
ENSSSCT00000037017	MSTRG.7745	FAM240A	MSTRG.7747.1	MSTRG.7747	.	0.72229
