# Supplementary material for: Mechanisms of Oogenesis-Related Long Non-coding RNAs in Porcine Ovaries Treated With Recombinant Pig Follicle-Stimulating Hormone
Source: Front Vet Sci. 2022 Feb 24;8:838703. doi: 10.3389/fvets.2021.838703 (PMC8908959; doi:10.3389/fvets.2021.838703)
Supplement: Supplementary file 9 [file Table_9.XLSX]

## Sheet: Sheet1
Supplymentary Table-S9 GO terms analysis of differentially lncRNAs expression.
GO_ID	GO_Term	GO_function	GO_class	S gene number	TS gene number	B gene number	TB gene number	pvalue
GO:0060047	heart contraction	biological_process	7	4	339	9	9238	0.00019392
GO:0030050	vesicle transport along actin filament	biological_process	6	4	339	12	9238	0.000697844
GO:0097413	Lewy body	cellular_component	6	3	339	7	9238	0.00153564
GO:0033688	regulation of osteoblast proliferation	biological_process	7	3	339	7	9238	0.00153564
GO:0005903	brush border	cellular_component	5	6	339	35	9238	0.00153947
GO:0042974	retinoic acid receptor binding	molecular_function	8	4	339	15	9238	0.00176331
GO:0051017	actin filament bundle assembly	biological_process	6	6	339	36	9238	0.00179129
GO:0000794	condensed nuclear chromosome	cellular_component	8	6	339	36	9238	0.00179129
GO:0050482	arachidonic acid secretion	biological_process	9	3	339	9	9238	0.00348874
GO:0050773	regulation of dendrite development	biological_process	11	4	339	18	9238	0.00362332
GO:0032420	stereocilium	cellular_component	6	5	339	29	9238	0.00371066
GO:0003950	NAD+ ADP-ribosyltransferase activity	molecular_function	7	4	339	20	9238	0.00541445
GO:0015629	actin cytoskeleton	cellular_component	7	13	339	161	9238	0.00624357
GO:0008483	transaminase activity	molecular_function	6	3	339	11	9238	0.00648829
GO:0017022	myosin binding	molecular_function	6	4	339	21	9238	0.0064981
GO:0043296	apical junction complex	cellular_component	5	4	339	21	9238	0.0064981
GO:1903673	mitotic cleavage furrow formation	biological_process	7	2	339	4	9238	0.00767012
GO:1902396	protein localization to bicellular tight junction	biological_process	7	2	339	4	9238	0.00767012
GO:0061383	trabecula morphogenesis	biological_process	5	2	339	4	9238	0.00767012
GO:0009609	response to symbiotic bacterium	biological_process	8	2	339	4	9238	0.00767012
GO:0038089	positive regulation of cell migration by vascular endothelial growth factor signaling pathway	biological_process	9	2	339	4	9238	0.00767012
GO:0033762	response to glucagon	biological_process	7	2	339	4	9238	0.00767012
GO:0097498	endothelial tube lumen extension	biological_process	9	2	339	4	9238	0.00767012
GO:0006546	glycine catabolic process	biological_process	12	2	339	4	9238	0.00767012
GO:0043366	beta selection	biological_process	5	2	339	4	9238	0.00767012
GO:1904695	positive regulation of vascular smooth muscle contraction	biological_process	11	2	339	4	9238	0.00767012
GO:1900078	positive regulation of cellular response to insulin stimulus	biological_process	7	2	339	4	9238	0.00767012
GO:0004047	aminomethyltransferase activity	molecular_function	7	2	339	4	9238	0.00767012
GO:0001998	angiotensin-mediated vasoconstriction involved in regulation of systemic arterial blood pressure	biological_process	8	2	339	4	9238	0.00767012
GO:0002363	alpha-beta T cell lineage commitment	biological_process	7	2	339	4	9238	0.00767012
GO:0019226	transmission of nerve impulse	biological_process	5	3	339	12	9238	0.00841844
GO:0030863	cortical cytoskeleton	cellular_component	7	3	339	12	9238	0.00841844
GO:0043534	blood vessel endothelial cell migration	biological_process	10	3	339	12	9238	0.00841844
GO:0060055	angiogenesis involved in wound healing	biological_process	6	3	339	12	9238	0.00841844
GO:0031941	filamentous actin	cellular_component	4	4	339	23	9238	0.00907583
GO:0006749	glutathione metabolic process	biological_process	8	4	339	24	9238	0.0105823
GO:0000212	meiotic spindle organization	biological_process	9	3	339	13	9238	0.0106503
GO:0090051	negative regulation of cell migration involved in sprouting angiogenesis	biological_process	12	3	339	13	9238	0.0106503
GO:1903506	regulation of nucleic acid-templated transcription	biological_process	9	3	339	13	9238	0.0106503
GO:0034329	cell junction assembly	biological_process	6	3	339	13	9238	0.0106503
GO:0032956	regulation of actin cytoskeleton organization	biological_process	7	6	339	52	9238	0.0114705
GO:1990589	ATF4-CREB1 transcription factor complex	cellular_component	7	2	339	5	9238	0.0124745
GO:1901407	regulation of phosphorylation of RNA polymerase II C-terminal domain	biological_process	10	2	339	5	9238	0.0124745
GO:0006081	cellular aldehyde metabolic process	biological_process	5	2	339	5	9238	0.0124745
GO:0004028	3-chloroallyl aldehyde dehydrogenase activity	molecular_function	7	2	339	5	9238	0.0124745
GO:0043931	ossification involved in bone maturation	biological_process	5	2	339	5	9238	0.0124745
GO:0001134	transcription regulator recruiting activity	molecular_function	6	2	339	5	9238	0.0124745
GO:0051272	positive regulation of cellular component movement	biological_process	7	2	339	5	9238	0.0124745
GO:1904628	cellular response to phorbol 13-acetate 12-myristate	biological_process	7	2	339	5	9238	0.0124745
GO:0099590	neurotransmitter receptor internalization	biological_process	10	2	339	5	9238	0.0124745
GO:0051450	myoblast proliferation	biological_process	4	2	339	5	9238	0.0124745
GO:0098749	cerebellar neuron development	biological_process	8	2	339	5	9238	0.0124745
GO:0003100	regulation of systemic arterial blood pressure by endothelin	biological_process	9	2	339	5	9238	0.0124745
GO:0035685	helper T cell diapedesis	biological_process	6	2	339	5	9238	0.0124745
GO:0106140	P-TEFb complex binding	molecular_function	5	2	339	5	9238	0.0124745
GO:0098943	neurotransmitter receptor transport, postsynaptic endosome to lysosome	biological_process	8	2	339	5	9238	0.0124745
GO:0061045	negative regulation of wound healing	biological_process	8	2	339	5	9238	0.0124745
GO:0001882	nucleoside binding	molecular_function	5	2	339	5	9238	0.0124745
GO:0051022	Rho GDP-dissociation inhibitor binding	molecular_function	6	2	339	5	9238	0.0124745
GO:0055025	positive regulation of cardiac muscle tissue development	biological_process	10	2	339	5	9238	0.0124745
GO:0016247	channel regulator activity	molecular_function	4	2	339	5	9238	0.0124745
GO:0002862	negative regulation of inflammatory response to antigenic stimulus	biological_process	10	2	339	5	9238	0.0124745
GO:0046887	positive regulation of hormone secretion	biological_process	8	2	339	5	9238	0.0124745
GO:0000302	response to reactive oxygen species	biological_process	6	3	339	14	9238	0.0131918
GO:0043297	apical junction assembly	biological_process	8	3	339	14	9238	0.0131918
GO:0006605	protein targeting	biological_process	11	4	339	26	9238	0.0140582
GO:0042542	response to hydrogen peroxide	biological_process	7	4	339	26	9238	0.0140582
GO:0048365	Rac GTPase binding	molecular_function	10	5	339	40	9238	0.0148117
GO:0071364	cellular response to epidermal growth factor stimulus	biological_process	6	4	339	27	9238	0.0160373
GO:0072687	meiotic spindle	cellular_component	7	3	339	15	9238	0.0160489
GO:0004364	glutathione transferase activity	molecular_function	6	3	339	15	9238	0.0160489
GO:0045198	establishment of epithelial cell apical/basal polarity	biological_process	8	3	339	15	9238	0.0160489
GO:0035729	cellular response to hepatocyte growth factor stimulus	biological_process	8	3	339	15	9238	0.0160489
GO:0019464	glycine decarboxylation via glycine cleavage system	biological_process	13	3	339	15	9238	0.0160489
GO:0005938	cell cortex	cellular_component	7	7	339	73	9238	0.0172448
GO:0005925	focal adhesion	cellular_component	7	9	339	108	9238	0.0175446
GO:0045309	protein phosphorylated amino acid binding	molecular_function	6	2	339	6	9238	0.0182607
GO:0004029	aldehyde dehydrogenase (NAD) activity	molecular_function	7	2	339	6	9238	0.0182607
GO:0033363	secretory granule organization	biological_process	7	2	339	6	9238	0.0182607
GO:0090324	negative regulation of oxidative phosphorylation	biological_process	11	2	339	6	9238	0.0182607
GO:0010944	negative regulation of transcription by competitive promoter binding	biological_process	10	2	339	6	9238	0.0182607
GO:0032735	positive regulation of interleukin-12 production	biological_process	8	2	339	6	9238	0.0182607
GO:0051702	interaction with symbiont	biological_process	5	2	339	6	9238	0.0182607
GO:0008349	MAP kinase kinase kinase kinase activity	molecular_function	9	2	339	6	9238	0.0182607
GO:0004322	ferroxidase activity	molecular_function	7	2	339	6	9238	0.0182607
GO:2001255	positive regulation of histone H3-K36 trimethylation	biological_process	13	2	339	6	9238	0.0182607
GO:0072675	osteoclast fusion	biological_process	6	2	339	6	9238	0.0182607
GO:0036089	cleavage furrow formation	biological_process	6	2	339	6	9238	0.0182607
GO:0042311	vasodilation	biological_process	10	2	339	6	9238	0.0182607
GO:1902766	skeletal muscle satellite cell migration	biological_process	7	2	339	6	9238	0.0182607
GO:0033599	regulation of mammary gland epithelial cell proliferation	biological_process	8	2	339	6	9238	0.0182607
GO:0033144	negative regulation of intracellular steroid hormone receptor signaling pathway	biological_process	9	2	339	6	9238	0.0182607
GO:0010594	regulation of endothelial cell migration	biological_process	9	2	339	6	9238	0.0182607
GO:0060193	positive regulation of lipase activity	biological_process	8	2	339	6	9238	0.0182607
GO:1990391	DNA repair complex	cellular_component	4	2	339	6	9238	0.0182607
GO:0035357	peroxisome proliferator activated receptor signaling pathway	biological_process	6	2	339	6	9238	0.0182607
GO:0051968	positive regulation of synaptic transmission, glutamatergic	biological_process	9	2	339	6	9238	0.0182607
GO:0032153	cell division site	cellular_component	4	2	339	6	9238	0.0182607
GO:1903427	negative regulation of reactive oxygen species biosynthetic process	biological_process	8	2	339	6	9238	0.0182607
GO:0031143	pseudopodium	cellular_component	6	3	339	16	9238	0.0192255
GO:0046889	positive regulation of lipid biosynthetic process	biological_process	8	3	339	16	9238	0.0192255
GO:0098632	cell-cell adhesion mediator activity	molecular_function	5	3	339	16	9238	0.0192255
GO:0019722	calcium-mediated signaling	biological_process	7	5	339	43	9238	0.0198271
GO:0060326	cell chemotaxis	biological_process	6	6	339	60	9238	0.0221306
GO:2000406	positive regulation of T cell migration	biological_process	9	3	339	17	9238	0.0227236
GO:0004623	phospholipase A2 activity	molecular_function	8	3	339	17	9238	0.0227236
GO:1902042	negative regulation of extrinsic apoptotic signaling pathway via death domain receptors	biological_process	11	3	339	17	9238	0.0227236
GO:0006471	protein ADP-ribosylation	biological_process	9	3	339	17	9238	0.0227236
GO:1990830	cellular response to leukemia inhibitory factor	biological_process	8	7	339	78	9238	0.0239724
GO:0018158	protein oxidation	biological_process	9	2	339	7	9238	0.0249507
GO:0010269	response to selenium ion	biological_process	6	2	339	7	9238	0.0249507
GO:0060428	lung epithelium development	biological_process	7	2	339	7	9238	0.0249507
GO:2000404	regulation of T cell migration	biological_process	8	2	339	7	9238	0.0249507
GO:0098970	postsynaptic neurotransmitter receptor diffusion trapping	biological_process	9	2	339	7	9238	0.0249507
GO:1990454	L-type voltage-gated calcium channel complex	cellular_component	10	2	339	7	9238	0.0249507
GO:0051653	spindle localization	biological_process	5	2	339	7	9238	0.0249507
GO:0002685	regulation of leukocyte migration	biological_process	6	2	339	7	9238	0.0249507
GO:0001885	endothelial cell development	biological_process	7	2	339	7	9238	0.0249507
GO:0005246	calcium channel regulator activity	molecular_function	6	2	339	7	9238	0.0249507
GO:0060509	type I pneumocyte differentiation	biological_process	8	2	339	7	9238	0.0249507
GO:0048549	positive regulation of pinocytosis	biological_process	9	2	339	7	9238	0.0249507
GO:0045792	negative regulation of cell size	biological_process	7	2	339	7	9238	0.0249507
GO:0015238	drug transmembrane transporter activity	NA	NA	2	339	7	9238	0.0249507
GO:0099122	RNA polymerase II C-terminal domain binding	molecular_function	8	2	339	7	9238	0.0249507
GO:2000810	regulation of bicellular tight junction assembly	biological_process	7	2	339	7	9238	0.0249507
GO:0044319	wound healing, spreading of cells	biological_process	7	3	339	18	9238	0.0265437
GO:0005719	nuclear euchromatin	cellular_component	8	3	339	18	9238	0.0265437
GO:0071346	cellular response to interferon-gamma	biological_process	8	6	339	63	9238	0.027435
GO:1901224	positive regulation of NIK/NF-kappaB signaling	biological_process	10	5	339	48	9238	0.0304373
GO:0071345	cellular response to cytokine stimulus	biological_process	7	3	339	19	9238	0.0306846
GO:0008353	RNA polymerase II CTD heptapeptide repeat kinase activity	molecular_function	9	3	339	19	9238	0.0306846
GO:0007173	epidermal growth factor receptor signaling pathway	biological_process	9	4	339	33	9238	0.0315173
GO:0043621	protein self-association	molecular_function	5	4	339	33	9238	0.0315173
GO:0036336	dendritic cell migration	biological_process	5	2	339	8	9238	0.0324708
GO:0071294	cellular response to zinc ion	biological_process	8	2	339	8	9238	0.0324708
GO:0032421	stereocilium bundle	cellular_component	5	2	339	8	9238	0.0324708
GO:0035385	Roundabout signaling pathway	biological_process	6	2	339	8	9238	0.0324708
GO:0021861	forebrain radial glial cell differentiation	biological_process	8	2	339	8	9238	0.0324708
GO:0048251	elastic fiber assembly	biological_process	7	2	339	8	9238	0.0324708
GO:0038027	apolipoprotein A-I-mediated signaling pathway	biological_process	6	2	339	8	9238	0.0324708
GO:0014902	myotube differentiation	biological_process	8	2	339	8	9238	0.0324708
GO:0072091	regulation of stem cell proliferation	biological_process	7	2	339	8	9238	0.0324708
GO:2000311	regulation of AMPA receptor activity	biological_process	10	2	339	8	9238	0.0324708
GO:0015693	magnesium ion transport	biological_process	10	2	339	8	9238	0.0324708
GO:0051924	regulation of calcium ion transport	biological_process	9	2	339	8	9238	0.0324708
GO:0071300	cellular response to retinoic acid	biological_process	7	4	339	34	9238	0.0347214
GO:0043542	endothelial cell migration	biological_process	9	3	339	20	9238	0.0351441
GO:0035758	chemokine (C-C motif) ligand 21 binding	molecular_function	8	1	339	1	9238	0.0366963
GO:0045016	mitochondrial magnesium ion transmembrane transport	biological_process	12	1	339	1	9238	0.0366963
GO:0051734	ATP-dependent polynucleotide kinase activity	molecular_function	8	1	339	1	9238	0.0366963
GO:0035695	mitophagy by induced vacuole formation	biological_process	8	1	339	1	9238	0.0366963
GO:0019448	L-cysteine catabolic process	biological_process	12	1	339	1	9238	0.0366963
GO:0050405	[acetyl-CoA carboxylase] kinase activity	molecular_function	8	1	339	1	9238	0.0366963
GO:0038161	prolactin signaling pathway	biological_process	6	1	339	1	9238	0.0366963
GO:0038121	C-C motif chemokine 21 receptor activity	molecular_function	10	1	339	1	9238	0.0366963
GO:0002885	positive regulation of hypersensitivity	biological_process	12	1	339	1	9238	0.0366963
GO:0035757	chemokine (C-C motif) ligand 19 binding	molecular_function	8	1	339	1	9238	0.0366963
GO:0045919	positive regulation of cytolysis	biological_process	7	1	339	1	9238	0.0366963
GO:2000526	positive regulation of glycoprotein biosynthetic process involved in immunological synapse formation	biological_process	10	1	339	1	9238	0.0366963
GO:0098972	anterograde dendritic transport of mitochondrion	biological_process	12	1	339	1	9238	0.0366963
GO:0071401	cellular response to triglyceride	biological_process	8	1	339	1	9238	0.0366963
GO:0004760	serine-pyruvate transaminase activity	molecular_function	7	1	339	1	9238	0.0366963
GO:0016012	sarcoglycan complex	cellular_component	6	1	339	1	9238	0.0366963
GO:0060393	regulation of pathway-restricted SMAD protein phosphorylation	biological_process	10	1	339	1	9238	0.0366963
GO:0038117	C-C motif chemokine 19 receptor activity	molecular_function	10	1	339	1	9238	0.0366963
GO:2000522	positive regulation of immunological synapse formation	biological_process	9	1	339	1	9238	0.0366963
GO:0034774	secretory granule lumen	cellular_component	7	1	339	1	9238	0.0366963
GO:0004621	glycosylphosphatidylinositol phospholipase D activity	molecular_function	9	1	339	1	9238	0.0366963
GO:0046724	oxalic acid secretion	biological_process	12	1	339	1	9238	0.0366963
GO:0002922	positive regulation of humoral immune response	biological_process	8	1	339	1	9238	0.0366963
GO:0051736	ATP-dependent polyribonucleotide 5'-hydroxyl-kinase activity	molecular_function	9	1	339	1	9238	0.0366963
GO:0047322	[hydroxymethylglutaryl-CoA reductase (NADPH)] kinase activity	molecular_function	8	1	339	1	9238	0.0366963
GO:0006507	GPI anchor release	biological_process	10	1	339	1	9238	0.0366963
GO:0072610	interleukin-12 secretion	biological_process	12	1	339	1	9238	0.0366963
GO:0051733	polydeoxyribonucleotide kinase activity	molecular_function	8	1	339	1	9238	0.0366963
GO:0060205	cytoplasmic vesicle lumen	cellular_component	6	1	339	1	9238	0.0366963
GO:0004925	prolactin receptor activity	molecular_function	7	1	339	1	9238	0.0366963
GO:0038115	chemokine (C-C motif) ligand 19 signaling pathway	biological_process	8	1	339	1	9238	0.0366963
GO:2000525	positive regulation of T cell costimulation	biological_process	10	1	339	1	9238	0.0366963
GO:0008453	alanine-glyoxylate transaminase activity	molecular_function	7	1	339	1	9238	0.0366963
GO:0042853	L-alanine catabolic process	biological_process	13	1	339	1	9238	0.0366963
GO:1990716	axonemal central apparatus	cellular_component	7	1	339	1	9238	0.0366963
GO:0072679	thymocyte migration	biological_process	7	1	339	1	9238	0.0366963
GO:0019265	glycine biosynthetic process, by transamination of glyoxylate	biological_process	13	1	339	1	9238	0.0366963
GO:0045335	phagocytic vesicle	cellular_component	8	6	339	68	9238	0.0380247
GO:0010975	regulation of neuron projection development	biological_process	10	3	339	21	9238	0.0399184
GO:0003143	embryonic heart tube morphogenesis	biological_process	6	2	339	9	9238	0.0407514
GO:0070593	dendrite self-avoidance	biological_process	6	2	339	9	9238	0.0407514
GO:0000185	activation of MAPKKK activity	biological_process	13	2	339	9	9238	0.0407514
GO:0038026	reelin-mediated signaling pathway	biological_process	6	2	339	9	9238	0.0407514
GO:0010812	negative regulation of cell-substrate adhesion	biological_process	7	2	339	9	9238	0.0407514
GO:0009410	response to xenobiotic stimulus	biological_process	5	2	339	9	9238	0.0407514
GO:0023019	signal transduction involved in regulation of gene expression	biological_process	5	2	339	9	9238	0.0407514
GO:0090201	negative regulation of release of cytochrome c from mitochondria	biological_process	10	2	339	9	9238	0.0407514
GO:0005355	glucose transmembrane transporter activity	molecular_function	9	2	339	9	9238	0.0407514
GO:1900748	positive regulation of vascular endothelial growth factor signaling pathway	biological_process	9	2	339	9	9238	0.0407514
GO:0004523	RNA-DNA hybrid ribonuclease activity	molecular_function	10	2	339	9	9238	0.0407514
GO:0050727	regulation of inflammatory response	biological_process	8	4	339	36	9238	0.0416764
GO:0042169	SH2 domain binding	molecular_function	6	4	339	36	9238	0.0416764
GO:0071902	positive regulation of protein serine/threonine kinase activity	biological_process	12	4	339	36	9238	0.0416764
GO:0071363	cellular response to growth factor stimulus	biological_process	7	3	339	22	9238	0.045003
GO:0061136	regulation of proteasomal protein catabolic process	biological_process	10	3	339	22	9238	0.045003
GO:0042493	response to drug	biological_process	5	5	339	54	9238	0.0471573
GO:0032154	cleavage furrow	cellular_component	5	4	339	38	9238	0.0493619
GO:0040038	polar body extrusion after meiotic divisions	biological_process	5	2	339	10	9238	0.0497269
GO:0001527	microfibril	cellular_component	5	2	339	10	9238	0.0497269
GO:0033194	response to hydroperoxide	biological_process	6	2	339	10	9238	0.0497269
GO:0046638	positive regulation of alpha-beta T cell differentiation	biological_process	11	2	339	10	9238	0.0497269
GO:0032281	AMPA glutamate receptor complex	cellular_component	8	2	339	10	9238	0.0497269
GO:0005852	eukaryotic translation initiation factor 3 complex	cellular_component	4	2	339	10	9238	0.0497269
GO:0004724	magnesium-dependent protein serine/threonine phosphatase activity	molecular_function	10	2	339	10	9238	0.0497269
GO:0002183	cytoplasmic translational initiation	biological_process	6	2	339	10	9238	0.0497269
GO:0033290	eukaryotic 48S preinitiation complex	cellular_component	7	2	339	10	9238	0.0497269
GO:0098839	postsynaptic density membrane	cellular_component	5	2	339	10	9238	0.0497269
GO:0015074	DNA integration	biological_process	8	2	339	10	9238	0.0497269
GO:0000083	regulation of transcription involved in G1/S transition of mitotic cell cycle	biological_process	9	2	339	10	9238	0.0497269
GO:0043149	stress fiber assembly	biological_process	8	2	339	10	9238	0.0497269
GO:1903672	positive regulation of sprouting angiogenesis	biological_process	9	2	339	10	9238	0.0497269
GO:0051489	regulation of filopodium assembly	biological_process	10	2	339	10	9238	0.0497269
GO:0001732	formation of cytoplasmic translation initiation complex	biological_process	9	2	339	10	9238	0.0497269
GO:0010033	response to organic substance	biological_process	5	3	339	23	9238	0.050392
GO:0031624	ubiquitin conjugating enzyme binding	molecular_function	7	3	339	23	9238	0.050392
GO:0009967	positive regulation of signal transduction	biological_process	8	4	339	39	9238	0.0534775
GO:0007160	cell-matrix adhesion	biological_process	6	5	339	56	9238	0.0537332
GO:0045121	membrane raft	cellular_component	6	7	339	93	9238	0.0543565
GO:0032467	positive regulation of cytokinesis	biological_process	9	3	339	24	9238	0.0560791
GO:0040018	positive regulation of multicellular organism growth	biological_process	8	3	339	24	9238	0.0560791
GO:0008360	regulation of cell shape	biological_process	8	7	339	94	9238	0.0569734
GO:0043087	regulation of GTPase activity	biological_process	7	5	339	57	9238	0.0572108
GO:0031532	actin cytoskeleton reorganization	biological_process	8	4	339	40	9238	0.0577737
GO:0102568	phospholipase A2 activity consuming 1,2-dioleoylphosphatidylethanolamine)	molecular_function	7	2	339	11	9238	0.0593354
GO:0017160	Ral GTPase binding	molecular_function	9	2	339	11	9238	0.0593354
GO:0045987	positive regulation of smooth muscle contraction	biological_process	10	2	339	11	9238	0.0593354
GO:0071380	cellular response to prostaglandin E stimulus	biological_process	8	2	339	11	9238	0.0593354
GO:0009650	UV protection	biological_process	8	2	339	11	9238	0.0593354
GO:1900025	negative regulation of substrate adhesion-dependent cell spreading	biological_process	10	2	339	11	9238	0.0593354
GO:0002042	cell migration involved in sprouting angiogenesis	biological_process	11	2	339	11	9238	0.0593354
GO:0070830	bicellular tight junction assembly	biological_process	9	2	339	11	9238	0.0593354
GO:0102567	phospholipase A2 activity (consuming 1,2-dipalmitoylphosphatidylcholine	molecular_function	7	2	339	11	9238	0.0593354
GO:0030950	establishment or maintenance of actin cytoskeleton polarity	biological_process	8	2	339	11	9238	0.0593354
GO:0033628	regulation of cell adhesion mediated by integrin	biological_process	6	2	339	11	9238	0.0593354
GO:2000146	negative regulation of cell motility	biological_process	7	2	339	11	9238	0.0593354
GO:0034122	negative regulation of toll-like receptor signaling pathway	biological_process	7	2	339	11	9238	0.0593354
GO:0001725	stress fiber	cellular_component	7	5	339	58	9238	0.0608149
GO:0005070	SH3/SH2 adaptor activity	molecular_function	7	3	339	25	9238	0.062057
GO:0034614	cellular response to reactive oxygen species	biological_process	7	3	339	25	9238	0.062057
GO:0009611	response to wounding	biological_process	5	3	339	25	9238	0.062057
GO:0016328	lateral plasma membrane	cellular_component	5	3	339	25	9238	0.062057
GO:0036126	sperm flagellum	cellular_component	5	3	339	26	9238	0.0683177
GO:0050919	negative chemotaxis	biological_process	6	3	339	26	9238	0.0683177
GO:0070507	regulation of microtubule cytoskeleton organization	biological_process	7	3	339	26	9238	0.0683177
GO:1904996	positive regulation of leukocyte adhesion to vascular endothelial cell	biological_process	9	2	339	12	9238	0.0695188
GO:0060396	growth hormone receptor signaling pathway	biological_process	8	2	339	12	9238	0.0695188
GO:0035082	axoneme assembly	biological_process	9	2	339	12	9238	0.0695188
GO:0045672	positive regulation of osteoclast differentiation	biological_process	10	2	339	12	9238	0.0695188
GO:1990404	protein ADP-ribosylase activity	molecular_function	7	2	339	12	9238	0.0695188
GO:0060430	lung saccule development	biological_process	5	2	339	12	9238	0.0695188
GO:0071803	positive regulation of podosome assembly	biological_process	8	2	339	12	9238	0.0695188
GO:0016282	eukaryotic 43S preinitiation complex	cellular_component	7	2	339	12	9238	0.0695188
GO:0001659	temperature homeostasis	biological_process	5	2	339	12	9238	0.0695188
GO:0004602	glutathione peroxidase activity	molecular_function	5	2	339	12	9238	0.0695188
GO:0051271	negative regulation of cellular component movement	biological_process	7	2	339	12	9238	0.0695188
GO:0015095	magnesium ion transmembrane transporter activity	molecular_function	9	2	339	12	9238	0.0695188
GO:0032930	positive regulation of superoxide anion generation	biological_process	10	2	339	12	9238	0.0695188
GO:0017046	peptide hormone binding	molecular_function	6	2	339	12	9238	0.0695188
GO:0050061	long-chain-aldehyde dehydrogenase activity	molecular_function	8	1	339	2	9238	0.0720497
GO:0071544	diphosphoinositol polyphosphate catabolic process	biological_process	9	1	339	2	9238	0.0720497
GO:0008486	diphosphoinositol-polyphosphate diphosphatase activity	molecular_function	8	1	339	2	9238	0.0720497
GO:0003308	negative regulation of Wnt signaling pathway involved in heart development	biological_process	10	1	339	2	9238	0.0720497
GO:0034136	negative regulation of toll-like receptor 2 signaling pathway	biological_process	8	1	339	2	9238	0.0720497
GO:0036335	intestinal stem cell homeostasis	biological_process	7	1	339	2	9238	0.0720497
GO:0015801	aromatic amino acid transport	biological_process	11	1	339	2	9238	0.0720497
GO:0047025	3-oxoacyl-[acyl-carrier-protein] reductase (NADH) activity	molecular_function	7	1	339	2	9238	0.0720497
GO:0048936	peripheral nervous system neuron axonogenesis	biological_process	10	1	339	2	9238	0.0720497
GO:0072202	cell differentiation involved in metanephros development	biological_process	7	1	339	2	9238	0.0720497
GO:0097513	myosin II filament	cellular_component	6	1	339	2	9238	0.0720497
GO:0045356	positive regulation of interferon-alpha biosynthetic process	biological_process	10	1	339	2	9238	0.0720497
GO:0000214	tRNA-intron endonuclease complex	cellular_component	6	1	339	2	9238	0.0720497
GO:0042662	negative regulation of mesodermal cell fate specification	biological_process	10	1	339	2	9238	0.0720497
GO:0060279	positive regulation of ovulation	biological_process	7	1	339	2	9238	0.0720497
GO:0097029	mature conventional dendritic cell differentiation	biological_process	8	1	339	2	9238	0.0720497
GO:0048866	stem cell fate specification	biological_process	6	1	339	2	9238	0.0720497
GO:0003870	5-aminolevulinate synthase activity	molecular_function	9	1	339	2	9238	0.0720497
GO:0050706	regulation of interleukin-1 beta secretion	biological_process	9	1	339	2	9238	0.0720497
GO:0046577	long-chain-alcohol oxidase activity	molecular_function	7	1	339	2	9238	0.0720497
GO:2001013	epithelial cell proliferation involved in renal tubule morphogenesis	biological_process	5	1	339	2	9238	0.0720497
GO:0033306	phytol metabolic process	biological_process	10	1	339	2	9238	0.0720497
GO:0008753	NADPH dehydrogenase (quinone) activity	molecular_function	7	1	339	2	9238	0.0720497
GO:1902350	cellular response to chloroquine	biological_process	7	1	339	2	9238	0.0720497
GO:0048297	negative regulation of isotype switching to IgA isotypes	biological_process	11	1	339	2	9238	0.0720497
GO:0035985	senescence-associated heterochromatin focus	cellular_component	8	1	339	2	9238	0.0720497
GO:1990204	oxidoreductase complex	cellular_component	4	1	339	2	9238	0.0720497
GO:0072224	metanephric glomerulus development	biological_process	6	1	339	2	9238	0.0720497
GO:0021903	rostrocaudal neural tube patterning	biological_process	7	1	339	2	9238	0.0720497
GO:0034440	lipid oxidation	biological_process	8	1	339	2	9238	0.0720497
GO:0042661	regulation of mesodermal cell fate specification	biological_process	9	1	339	2	9238	0.0720497
GO:0046882	negative regulation of follicle-stimulating hormone secretion	biological_process	10	1	339	2	9238	0.0720497
GO:0034441	plasma lipoprotein particle oxidation	biological_process	9	1	339	2	9238	0.0720497
GO:0060913	cardiac cell fate determination	biological_process	6	1	339	2	9238	0.0720497
GO:0018479	benzaldehyde dehydrogenase (NAD+) activity	molecular_function	8	1	339	2	9238	0.0720497
GO:0120012	intermembrane sphingolipid transfer	biological_process	7	1	339	2	9238	0.0720497
GO:0030338	CMP-N-acetylneuraminate monooxygenase activity	molecular_function	7	1	339	2	9238	0.0720497
GO:1903919	negative regulation of actin filament severing	biological_process	7	1	339	2	9238	0.0720497
GO:0006778	porphyrin-containing compound metabolic process	biological_process	7	1	339	2	9238	0.0720497
GO:0046458	hexadecanal metabolic process	biological_process	6	1	339	2	9238	0.0720497
GO:0035986	senescence-associated heterochromatin focus assembly	biological_process	8	1	339	2	9238	0.0720497
GO:0046381	CMP-N-acetylneuraminate metabolic process	biological_process	6	1	339	2	9238	0.0720497
GO:0003847	1-alkyl-2-acetylglycerophosphocholine esterase activity	molecular_function	7	1	339	2	9238	0.0720497
GO:0003142	cardiogenic plate morphogenesis	biological_process	5	1	339	2	9238	0.0720497
GO:0061290	canonical Wnt signaling pathway involved in metanephric kidney development	biological_process	9	1	339	2	9238	0.0720497
GO:0052814	medium-chain-aldehyde dehydrogenase activity	molecular_function	8	1	339	2	9238	0.0720497
GO:2000043	regulation of cardiac cell fate specification	biological_process	9	1	339	2	9238	0.0720497
GO:0090402	oncogene-induced cell senescence	biological_process	7	1	339	2	9238	0.0720497
GO:0015173	aromatic amino acid transmembrane transporter activity	molecular_function	8	1	339	2	9238	0.0720497
GO:0000303	response to superoxide	biological_process	8	1	339	2	9238	0.0720497
GO:0048178	negative regulation of hepatocyte growth factor biosynthetic process	biological_process	9	1	339	2	9238	0.0720497
GO:0061513	glucose 6-phosphate:inorganic phosphate antiporter activity	molecular_function	8	1	339	2	9238	0.0720497
GO:0051295	establishment of meiotic spindle localization	biological_process	9	1	339	2	9238	0.0720497
GO:0097433	dense body	cellular_component	6	1	339	2	9238	0.0720497
GO:0060807	regulation of transcription from RNA polymerase II promoter involved in definitive endodermal cell fate specification	biological_process	12	1	339	2	9238	0.0720497
GO:0045322	unmethylated CpG binding	molecular_function	8	1	339	2	9238	0.0720497
GO:0008112	nicotinamide N-methyltransferase activity	molecular_function	8	1	339	2	9238	0.0720497
GO:0072104	glomerular capillary formation	biological_process	6	1	339	2	9238	0.0720497
GO:0004784	superoxide dismutase activity	molecular_function	4	1	339	2	9238	0.0720497
GO:0002043	blood vessel endothelial cell proliferation involved in sprouting angiogenesis	biological_process	6	1	339	2	9238	0.0720497
GO:0120017	intermembrane ceramide transfer activity	molecular_function	7	1	339	2	9238	0.0720497
GO:0046469	platelet activating factor metabolic process	biological_process	9	1	339	2	9238	0.0720497
GO:0033209	tumor necrosis factor-mediated signaling pathway	biological_process	7	3	339	27	9238	0.0748528
GO:0030335	positive regulation of cell migration	biological_process	8	9	339	143	9238	0.0799953
GO:0032839	dendrite cytoplasm	cellular_component	9	2	339	13	9238	0.0802222
GO:1902176	negative regulation of oxidative stress-induced intrinsic apoptotic signaling pathway	biological_process	9	2	339	13	9238	0.0802222
GO:0051403	stress-activated MAPK cascade	biological_process	12	2	339	13	9238	0.0802222
GO:2000177	regulation of neural precursor cell proliferation	biological_process	7	2	339	13	9238	0.0802222
GO:0071397	cellular response to cholesterol	biological_process	9	2	339	13	9238	0.0802222
GO:1990782	protein tyrosine kinase binding	molecular_function	8	2	339	13	9238	0.0802222
GO:0045671	negative regulation of osteoclast differentiation	biological_process	10	2	339	13	9238	0.0802222
GO:0048384	retinoic acid receptor signaling pathway	biological_process	6	2	339	13	9238	0.0802222
GO:0043280	positive regulation of cysteine-type endopeptidase activity involved in apoptotic process	biological_process	10	3	339	28	9238	0.0816532
GO:0030866	cortical actin cytoskeleton organization	biological_process	8	3	339	28	9238	0.0816532
GO:1900026	positive regulation of substrate adhesion-dependent cell spreading	biological_process	10	3	339	28	9238	0.0816532
GO:0006644	phospholipid metabolic process	biological_process	7	3	339	28	9238	0.0816532
GO:0016042	lipid catabolic process	biological_process	6	4	339	45	9238	0.0819029
GO:0018105	peptidyl-serine phosphorylation	biological_process	10	8	339	124	9238	0.0855051
GO:0051496	positive regulation of stress fiber assembly	biological_process	8	4	339	46	9238	0.0872419
GO:0005547	phosphatidylinositol-3,4,5-trisphosphate binding	molecular_function	8	3	339	29	9238	0.0887095
GO:0006629	lipid metabolic process	biological_process	5	9	339	147	9238	0.0912614
GO:0021795	cerebral cortex cell migration	biological_process	9	2	339	14	9238	0.091394
GO:0043403	skeletal muscle tissue regeneration	biological_process	7	2	339	14	9238	0.091394
GO:0008376	acetylgalactosaminyltransferase activity	molecular_function	7	2	339	14	9238	0.091394
GO:0070577	lysine-acetylated histone binding	molecular_function	6	2	339	14	9238	0.091394
GO:0098686	hippocampal mossy fiber to CA3 synapse	cellular_component	5	2	339	14	9238	0.091394
GO:0040016	embryonic cleavage	biological_process	5	2	339	14	9238	0.091394
GO:0006855	drug transmembrane transport	biological_process	7	2	339	14	9238	0.091394
GO:0016620	oxidoreductase activity, acting on the aldehyde or oxo group of donors, NAD or NADP as acceptor	molecular_function	6	2	339	14	9238	0.091394
GO:0045862	positive regulation of proteolysis	biological_process	9	2	339	14	9238	0.091394
GO:0046676	negative regulation of insulin secretion	biological_process	11	2	339	14	9238	0.091394
GO:0031098	stress-activated protein kinase signaling cascade	biological_process	6	4	339	47	9238	0.0927454
GO:0007266	Rho protein signal transduction	biological_process	8	4	339	47	9238	0.0927454
GO:0071944	cell periphery	cellular_component	4	4	339	48	9238	0.0984097
GO:0005549	odorant binding	molecular_function	4	2	339	15	9238	0.102985
GO:0006446	regulation of translational initiation	biological_process	10	2	339	15	9238	0.102985
GO:0042476	odontogenesis	biological_process	6	2	339	15	9238	0.102985
GO:0090314	positive regulation of protein targeting to membrane	biological_process	11	2	339	15	9238	0.102985
GO:0021983	pituitary gland development	biological_process	7	2	339	15	9238	0.102985
GO:0035497	cAMP response element binding	molecular_function	11	2	339	15	9238	0.102985
GO:0043393	regulation of protein binding	biological_process	6	2	339	15	9238	0.102985
GO:0043024	ribosomal small subunit binding	molecular_function	6	2	339	15	9238	0.102985
GO:1900181	negative regulation of protein localization to nucleus	biological_process	9	2	339	15	9238	0.102985
GO:0071310	cellular response to organic substance	biological_process	6	3	339	31	9238	0.103551
GO:0009966	regulation of signal transduction	biological_process	7	3	339	31	9238	0.103551
GO:0000793	condensed chromosome	cellular_component	7	3	339	31	9238	0.103551
GO:0010595	positive regulation of endothelial cell migration	biological_process	10	3	339	31	9238	0.103551
GO:0005884	actin filament	cellular_component	7	4	339	49	9238	0.104231
GO:0072350	tricarboxylic acid metabolic process	biological_process	8	1	339	3	9238	0.106109
GO:0003680	AT DNA binding	molecular_function	9	1	339	3	9238	0.106109
GO:0097016	L27 domain binding	molecular_function	6	1	339	3	9238	0.106109
GO:0060242	contact inhibition	biological_process	4	1	339	3	9238	0.106109
GO:0004499	N,N-dimethylaniline monooxygenase activity	molecular_function	7	1	339	3	9238	0.106109
GO:0090284	positive regulation of protein glycosylation in Golgi	biological_process	11	1	339	3	9238	0.106109
GO:0060054	positive regulation of epithelial cell proliferation involved in wound healing	biological_process	9	1	339	3	9238	0.106109
GO:0002730	regulation of dendritic cell cytokine production	biological_process	8	1	339	3	9238	0.106109
GO:0008962	phosphatidylglycerophosphatase activity	molecular_function	8	1	339	3	9238	0.106109
GO:0047708	biotinidase activity	molecular_function	7	1	339	3	9238	0.106109
GO:0003860	3-hydroxyisobutyryl-CoA hydrolase activity	molecular_function	8	1	339	3	9238	0.106109
GO:0003955	NAD(P)H dehydrogenase (quinone) activity	molecular_function	7	1	339	3	9238	0.106109
GO:0060214	endocardium formation	biological_process	5	1	339	3	9238	0.106109
GO:0061010	gall bladder development	biological_process	6	1	339	3	9238	0.106109
GO:0005087	Ran guanyl-nucleotide exchange factor activity	molecular_function	9	1	339	3	9238	0.106109
GO:0004758	serine C-palmitoyltransferase activity	molecular_function	9	1	339	3	9238	0.106109
GO:0009436	glyoxylate catabolic process	biological_process	7	1	339	3	9238	0.106109
GO:0031264	death-inducing signaling complex	cellular_component	6	1	339	3	9238	0.106109
GO:0050793	regulation of developmental process	biological_process	5	1	339	3	9238	0.106109
GO:0070327	thyroid hormone transport	biological_process	7	1	339	3	9238	0.106109
GO:0006313	transposition, DNA-mediated	biological_process	9	1	339	3	9238	0.106109
GO:0051252	regulation of RNA metabolic process	biological_process	8	1	339	3	9238	0.106109
GO:0043009	chordate embryonic development	biological_process	7	1	339	3	9238	0.106109
GO:0005043	netrin receptor activity involved in chemorepulsion	molecular_function	7	1	339	3	9238	0.106109
GO:2000758	positive regulation of peptidyl-lysine acetylation	biological_process	11	1	339	3	9238	0.106109
GO:0071894	histone H2B conserved C-terminal lysine ubiquitination	biological_process	14	1	339	3	9238	0.106109
GO:0047499	calcium-independent phospholipase A2 activity	molecular_function	9	1	339	3	9238	0.106109
GO:1900076	regulation of cellular response to insulin stimulus	biological_process	6	1	339	3	9238	0.106109
GO:0090694	Scc2-Scc4 cohesin loading complex	cellular_component	5	1	339	3	9238	0.106109
GO:0032385	positive regulation of intracellular cholesterol transport	biological_process	11	1	339	3	9238	0.106109
GO:0031265	CD95 death-inducing signaling complex	cellular_component	7	1	339	3	9238	0.106109
GO:2000002	negative regulation of DNA damage checkpoint	biological_process	9	1	339	3	9238	0.106109
GO:0046404	ATP-dependent polydeoxyribonucleotide 5'-hydroxyl-kinase activity	molecular_function	9	1	339	3	9238	0.106109
GO:1902595	regulation of DNA replication origin binding	biological_process	7	1	339	3	9238	0.106109
GO:0019858	cytosine metabolic process	biological_process	10	1	339	3	9238	0.106109
GO:1904693	midbrain morphogenesis	biological_process	5	1	339	3	9238	0.106109
GO:0071148	TEAD-1-YAP complex	cellular_component	7	1	339	3	9238	0.106109
GO:0070512	positive regulation of histone H4-K20 methylation	biological_process	12	1	339	3	9238	0.106109
GO:0035722	interleukin-12-mediated signaling pathway	biological_process	7	1	339	3	9238	0.106109
GO:0031010	ISWI-type complex	cellular_component	8	1	339	3	9238	0.106109
GO:0044839	cell cycle G2/M phase transition	biological_process	6	1	339	3	9238	0.106109
GO:0090085	regulation of protein deubiquitination	biological_process	9	1	339	3	9238	0.106109
GO:0030832	regulation of actin filament length	biological_process	6	1	339	3	9238	0.106109
GO:0038100	nodal binding	molecular_function	5	1	339	3	9238	0.106109
GO:0045236	CXCR chemokine receptor binding	molecular_function	8	1	339	3	9238	0.106109
GO:0036481	intrinsic apoptotic signaling pathway in response to hydrogen peroxide	biological_process	8	1	339	3	9238	0.106109
GO:0002408	myeloid dendritic cell chemotaxis	biological_process	7	1	339	3	9238	0.106109
GO:0051088	PMA-inducible membrane protein ectodomain proteolysis	biological_process	10	1	339	3	9238	0.106109
GO:0033038	bitter taste receptor activity	molecular_function	7	1	339	3	9238	0.106109
GO:1904182	regulation of pyruvate dehydrogenase activity	biological_process	7	1	339	3	9238	0.106109
GO:0006782	protoporphyrinogen IX biosynthetic process	biological_process	9	1	339	3	9238	0.106109
GO:0001828	inner cell mass cellular morphogenesis	biological_process	8	1	339	3	9238	0.106109
GO:0032116	SMC loading complex	cellular_component	4	1	339	3	9238	0.106109
GO:0090537	CERF complex	cellular_component	9	1	339	3	9238	0.106109
GO:1905314	semi-lunar valve development	biological_process	6	1	339	3	9238	0.106109
GO:0034057	RNA strand-exchange activity	molecular_function	8	1	339	3	9238	0.106109
GO:0061026	cardiac muscle tissue regeneration	biological_process	7	1	339	3	9238	0.106109
GO:0098957	anterograde axonal transport of mitochondrion	biological_process	12	1	339	3	9238	0.106109
GO:2000568	positive regulation of memory T cell activation	biological_process	10	1	339	3	9238	0.106109
GO:0000018	regulation of DNA recombination	biological_process	9	1	339	3	9238	0.106109
GO:0018872	arsonoacetate metabolic process	biological_process	6	1	339	3	9238	0.106109
GO:0055013	cardiac muscle cell development	biological_process	8	1	339	3	9238	0.106109
GO:0098554	cytoplasmic side of endoplasmic reticulum membrane	cellular_component	7	1	339	3	9238	0.106109
GO:0001520	outer dense fiber	cellular_component	5	1	339	3	9238	0.106109
GO:0046642	negative regulation of alpha-beta T cell proliferation	biological_process	12	1	339	3	9238	0.106109
GO:0035250	UDP-galactosyltransferase activity	molecular_function	7	1	339	3	9238	0.106109
GO:0017059	serine C-palmitoyltransferase complex	cellular_component	8	1	339	3	9238	0.106109
GO:0060449	bud elongation involved in lung branching	biological_process	8	1	339	3	9238	0.106109
GO:0090045	positive regulation of deacetylase activity	biological_process	8	1	339	3	9238	0.106109
GO:0045048	protein insertion into ER membrane	biological_process	9	1	339	3	9238	0.106109
GO:0050707	regulation of cytokine secretion	biological_process	7	1	339	3	9238	0.106109
GO:0035409	histone H3-Y41 phosphorylation	biological_process	12	1	339	3	9238	0.106109
GO:0035033	histone deacetylase regulator activity	molecular_function	5	1	339	3	9238	0.106109
GO:0004676	3-phosphoinositide-dependent protein kinase activity	molecular_function	9	1	339	3	9238	0.106109
GO:0016576	histone dephosphorylation	biological_process	10	1	339	3	9238	0.106109
GO:0036374	glutathione hydrolase activity	molecular_function	9	1	339	3	9238	0.106109
GO:0003252	negative regulation of cell proliferation involved in heart valve morphogenesis	biological_process	9	1	339	3	9238	0.106109
GO:0003945	N-acetyllactosamine synthase activity	molecular_function	8	1	339	3	9238	0.106109
GO:0030792	methylarsonite methyltransferase activity	molecular_function	8	1	339	3	9238	0.106109
GO:0070358	actin polymerization-dependent cell motility	biological_process	6	1	339	3	9238	0.106109
GO:0006574	valine catabolic process	biological_process	11	1	339	3	9238	0.106109
GO:0035624	receptor transactivation	biological_process	10	1	339	3	9238	0.106109
GO:0032741	positive regulation of interleukin-18 production	biological_process	8	1	339	3	9238	0.106109
GO:0048588	developmental cell growth	biological_process	5	1	339	3	9238	0.106109
GO:0033028	myeloid cell apoptotic process	biological_process	7	1	339	3	9238	0.106109
GO:0014889	muscle atrophy	biological_process	7	1	339	3	9238	0.106109
GO:1903588	negative regulation of blood vessel endothelial cell proliferation involved in sprouting angiogenesis	biological_process	10	1	339	3	9238	0.106109
GO:0032796	uropod organization	biological_process	7	1	339	3	9238	0.106109
GO:0098882	structural constituent of presynaptic active zone	molecular_function	6	1	339	3	9238	0.106109
GO:0009268	response to pH	biological_process	5	1	339	3	9238	0.106109
GO:0097025	MPP7-DLG1-LIN7 complex	cellular_component	6	1	339	3	9238	0.106109
GO:0043503	skeletal muscle fiber adaptation	biological_process	5	1	339	3	9238	0.106109
GO:0033127	regulation of histone phosphorylation	biological_process	10	1	339	3	9238	0.106109
GO:0048790	maintenance of presynaptic active zone structure	biological_process	7	1	339	3	9238	0.106109
GO:0042985	negative regulation of amyloid precursor protein biosynthetic process	biological_process	10	1	339	3	9238	0.106109
GO:0046831	regulation of RNA export from nucleus	biological_process	8	1	339	3	9238	0.106109
GO:0071921	cohesin loading	biological_process	8	1	339	3	9238	0.106109
GO:0019065	receptor-mediated endocytosis of virus by host cell	biological_process	9	1	339	3	9238	0.106109
GO:0034163	regulation of toll-like receptor 9 signaling pathway	biological_process	9	1	339	3	9238	0.106109
GO:1903070	negative regulation of ER-associated ubiquitin-dependent protein catabolic process	biological_process	13	1	339	3	9238	0.106109
GO:0044818	mitotic G2/M transition checkpoint	biological_process	6	1	339	3	9238	0.106109
GO:0032872	regulation of stress-activated MAPK cascade	biological_process	11	1	339	3	9238	0.106109
GO:0070762	nuclear pore transmembrane ring	cellular_component	4	1	339	3	9238	0.106109
GO:0000820	regulation of glutamine family amino acid metabolic process	biological_process	9	1	339	3	9238	0.106109
GO:0002357	defense response to tumor cell	biological_process	6	1	339	3	9238	0.106109
GO:0016941	natriuretic peptide receptor activity	molecular_function	6	1	339	3	9238	0.106109
GO:0045541	negative regulation of cholesterol biosynthetic process	biological_process	11	1	339	3	9238	0.106109
GO:0004630	phospholipase D activity	molecular_function	8	1	339	3	9238	0.106109
GO:0016011	dystroglycan complex	cellular_component	6	1	339	3	9238	0.106109
GO:0046487	glyoxylate metabolic process	biological_process	6	1	339	3	9238	0.106109
GO:0005826	actomyosin contractile ring	cellular_component	5	1	339	3	9238	0.106109
GO:0004803	transposase activity	molecular_function	5	1	339	3	9238	0.106109
GO:0010909	positive regulation of heparan sulfate proteoglycan biosynthetic process	biological_process	10	1	339	3	9238	0.106109
GO:0030791	arsenite methyltransferase activity	molecular_function	8	1	339	3	9238	0.106109
GO:0097010	eukaryotic translation initiation factor 4F complex assembly	biological_process	8	1	339	3	9238	0.106109
GO:0023030	MHC class Ib protein binding, via antigen binding groove	molecular_function	8	1	339	3	9238	0.106109
GO:0061690	lipoamidase activity	molecular_function	7	1	339	3	9238	0.106109
GO:0015349	thyroid hormone transmembrane transporter activity	molecular_function	7	1	339	3	9238	0.106109
GO:1903361	protein localization to basolateral plasma membrane	biological_process	8	1	339	3	9238	0.106109
GO:0035401	histone kinase activity (H3-Y41 specific	molecular_function	11	1	339	3	9238	0.106109
GO:0036019	endolysosome	cellular_component	9	1	339	3	9238	0.106109
GO:0062028	regulation of stress granule assembly	biological_process	7	1	339	3	9238	0.106109
GO:0002158	osteoclast proliferation	biological_process	5	1	339	3	9238	0.106109
GO:0035621	ER to Golgi ceramide transport	biological_process	9	1	339	3	9238	0.106109
GO:0070697	activin receptor binding	molecular_function	8	1	339	3	9238	0.106109
GO:0044783	G1 DNA damage checkpoint	biological_process	8	1	339	3	9238	0.106109
GO:0060046	regulation of acrosome reaction	biological_process	7	1	339	3	9238	0.106109
GO:0060998	regulation of dendritic spine development	biological_process	12	1	339	3	9238	0.106109
GO:0032587	ruffle membrane	cellular_component	6	4	339	50	9238	0.110207
GO:0005262	calcium channel activity	molecular_function	8	3	339	32	9238	0.111315
GO:0030175	filopodium	cellular_component	7	3	339	32	9238	0.111315
GO:0005911	cell-cell junction	cellular_component	4	8	339	132	9238	0.112088
GO:0017124	SH3 domain binding	molecular_function	6	5	339	70	9238	0.113663
GO:1905564	positive regulation of vascular endothelial cell proliferation	biological_process	10	2	339	16	9238	0.114951
GO:0008631	intrinsic apoptotic signaling pathway in response to oxidative stress	biological_process	7	2	339	16	9238	0.114951
GO:0004707	MAP kinase activity	molecular_function	9	2	339	16	9238	0.114951
GO:0007595	lactation	biological_process	8	2	339	16	9238	0.114951
GO:0070063	RNA polymerase binding	molecular_function	6	2	339	16	9238	0.114951
GO:0043525	positive regulation of neuron apoptotic process	biological_process	10	2	339	16	9238	0.114951
GO:0006694	steroid biosynthetic process	biological_process	7	2	339	16	9238	0.114951
GO:0043523	regulation of neuron apoptotic process	biological_process	9	2	339	16	9238	0.114951
GO:0040029	regulation of gene expression, epigenetic	biological_process	8	2	339	16	9238	0.114951
GO:0051290	protein heterotetramerization	biological_process	9	2	339	16	9238	0.114951
GO:0008378	galactosyltransferase activity	molecular_function	7	2	339	16	9238	0.114951
GO:0030521	androgen receptor signaling pathway	biological_process	7	2	339	16	9238	0.114951
GO:0010332	response to gamma radiation	biological_process	7	2	339	16	9238	0.114951
GO:0007156	homophilic cell adhesion via plasma membrane adhesion molecules	biological_process	7	5	339	71	9238	0.118829
GO:0003779	actin binding	molecular_function	6	12	339	224	9238	0.121688
GO:0034765	regulation of ion transmembrane transport	biological_process	8	4	339	52	9238	0.122602
GO:0005244	voltage-gated ion channel activity	molecular_function	9	4	339	52	9238	0.122602
GO:0033627	cell adhesion mediated by integrin	biological_process	5	2	339	17	9238	0.127248
GO:1904659	glucose transmembrane transport	biological_process	11	2	339	17	9238	0.127248
GO:1990869	cellular response to chemokine	biological_process	8	2	339	17	9238	0.127248
GO:0006261	DNA-dependent DNA replication	biological_process	9	2	339	17	9238	0.127248
GO:0008143	poly(A) binding	molecular_function	9	2	339	17	9238	0.127248
GO:0030837	negative regulation of actin filament polymerization	biological_process	9	2	339	17	9238	0.127248
GO:0043124	negative regulation of I-kappaB kinase/NF-kappaB signaling	biological_process	10	3	339	34	9238	0.127479
GO:0019904	protein domain specific binding	molecular_function	5	9	339	160	9238	0.133948
GO:0007264	small GTPase mediated signal transduction	biological_process	6	6	339	95	9238	0.135751
GO:0030659	cytoplasmic vesicle membrane	cellular_component	6	3	339	35	9238	0.135858
GO:0035690	cellular response to drug	biological_process	6	3	339	35	9238	0.135858
GO:0030838	positive regulation of actin filament polymerization	biological_process	9	3	339	35	9238	0.135858
GO:0006633	fatty acid biosynthetic process	biological_process	10	3	339	35	9238	0.135858
GO:0016358	dendrite development	biological_process	8	3	339	35	9238	0.135858
GO:0016604	nuclear body	cellular_component	7	12	339	229	9238	0.136434
GO:0045136	development of secondary sexual characteristics	biological_process	5	1	339	4	9238	0.138922
GO:0060841	venous blood vessel development	biological_process	6	1	339	4	9238	0.138922
GO:0034162	toll-like receptor 9 signaling pathway	biological_process	9	1	339	4	9238	0.138922
GO:0070315	G1 to G0 transition involved in cell differentiation	biological_process	6	1	339	4	9238	0.138922
GO:0052405	negative regulation by host of symbiont molecular function	biological_process	8	1	339	4	9238	0.138922
GO:0031428	box C/D snoRNP complex	cellular_component	6	1	339	4	9238	0.138922
GO:0071149	TEAD-2-YAP complex	cellular_component	7	1	339	4	9238	0.138922
GO:0008079	translation termination factor activity	molecular_function	8	1	339	4	9238	0.138922
GO:1902037	negative regulation of hematopoietic stem cell differentiation	biological_process	9	1	339	4	9238	0.138922
GO:0051770	positive regulation of nitric-oxide synthase biosynthetic process	biological_process	9	1	339	4	9238	0.138922
GO:0097001	ceramide binding	molecular_function	5	1	339	4	9238	0.138922
GO:1903265	positive regulation of tumor necrosis factor-mediated signaling pathway	biological_process	10	1	339	4	9238	0.138922
GO:2000646	positive regulation of receptor catabolic process	biological_process	8	1	339	4	9238	0.138922
GO:0045199	maintenance of epithelial cell apical/basal polarity	biological_process	7	1	339	4	9238	0.138922
GO:0098759	cellular response to interleukin-8	biological_process	8	1	339	4	9238	0.138922
GO:0061384	heart trabecula morphogenesis	biological_process	6	1	339	4	9238	0.138922
GO:0097176	epoxide metabolic process	biological_process	6	1	339	4	9238	0.138922
GO:0042074	cell migration involved in gastrulation	biological_process	8	1	339	4	9238	0.138922
GO:0016460	myosin II complex	cellular_component	5	1	339	4	9238	0.138922
GO:0008329	signaling pattern recognition receptor activity	molecular_function	6	1	339	4	9238	0.138922
GO:0005131	growth hormone receptor binding	molecular_function	7	1	339	4	9238	0.138922
GO:0038116	chemokine (C-C motif) ligand 21 signaling pathway	biological_process	8	1	339	4	9238	0.138922
GO:1902073	positive regulation of hypoxia-inducible factor-1alpha signaling pathway	biological_process	9	1	339	4	9238	0.138922
GO:0035020	regulation of Rac protein signal transduction	biological_process	11	1	339	4	9238	0.138922
GO:0097342	ripoptosome	cellular_component	7	1	339	4	9238	0.138922
GO:0005000	vasopressin receptor activity	molecular_function	7	1	339	4	9238	0.138922
GO:0044265	cellular macromolecule catabolic process	biological_process	7	1	339	4	9238	0.138922
GO:0061308	cardiac neural crest cell development involved in heart development	biological_process	8	1	339	4	9238	0.138922
GO:0001573	ganglioside metabolic process	biological_process	10	1	339	4	9238	0.138922
GO:0008188	neuropeptide receptor activity	molecular_function	7	1	339	4	9238	0.138922
GO:0043304	regulation of mast cell degranulation	biological_process	9	1	339	4	9238	0.138922
GO:0038007	netrin-activated signaling pathway	biological_process	6	1	339	4	9238	0.138922
GO:0007171	activation of transmembrane receptor protein tyrosine kinase activity	biological_process	13	1	339	4	9238	0.138922
GO:0035088	establishment or maintenance of apical/basal cell polarity	biological_process	6	1	339	4	9238	0.138922
GO:2000279	negative regulation of DNA biosynthetic process	biological_process	9	1	339	4	9238	0.138922
GO:1903966	monounsaturated fatty acid biosynthetic process	biological_process	12	1	339	4	9238	0.138922
GO:0019797	procollagen-proline 3-dioxygenase activity	molecular_function	9	1	339	4	9238	0.138922
GO:1990791	dorsal root ganglion development	biological_process	7	1	339	4	9238	0.138922
GO:0031436	BRCA1-BARD1 complex	cellular_component	7	1	339	4	9238	0.138922
GO:0031883	taste receptor binding	molecular_function	7	1	339	4	9238	0.138922
GO:1904694	negative regulation of vascular smooth muscle contraction	biological_process	11	1	339	4	9238	0.138922
GO:0140294	NAD DNA ADP-ribosyltransferase activity	molecular_function	7	1	339	4	9238	0.138922
GO:0032964	collagen biosynthetic process	biological_process	5	1	339	4	9238	0.138922
GO:0001778	plasma membrane repair	biological_process	7	1	339	4	9238	0.138922
GO:0048842	positive regulation of axon extension involved in axon guidance	biological_process	9	1	339	4	9238	0.138922
GO:0002764	immune response-regulating signaling pathway	biological_process	5	1	339	4	9238	0.138922
GO:0044849	estrous cycle	biological_process	5	1	339	4	9238	0.138922
GO:0050913	sensory perception of bitter taste	biological_process	9	1	339	4	9238	0.138922
GO:0001842	neural fold formation	biological_process	8	1	339	4	9238	0.138922
GO:0000738	DNA catabolic process, exonucleolytic	biological_process	9	1	339	4	9238	0.138922
GO:0070915	lysophosphatidic acid receptor activity	molecular_function	8	1	339	4	9238	0.138922
GO:1905684	regulation of plasma membrane repair	biological_process	9	1	339	4	9238	0.138922
GO:0045359	positive regulation of interferon-beta biosynthetic process	biological_process	10	1	339	4	9238	0.138922
GO:0061113	pancreas morphogenesis	biological_process	6	1	339	4	9238	0.138922
GO:2000182	regulation of progesterone biosynthetic process	biological_process	9	1	339	4	9238	0.138922
GO:0014916	regulation of lung blood pressure	biological_process	6	1	339	4	9238	0.138922
GO:2000035	regulation of stem cell division	biological_process	7	1	339	4	9238	0.138922
GO:0046322	negative regulation of fatty acid oxidation	biological_process	10	1	339	4	9238	0.138922
GO:1902731	negative regulation of chondrocyte proliferation	biological_process	8	1	339	4	9238	0.138922
GO:1902570	protein localization to nucleolus	biological_process	9	1	339	4	9238	0.138922
GO:0016149	translation release factor activity, codon specific	molecular_function	10	1	339	4	9238	0.138922
GO:0072282	metanephric nephron tubule morphogenesis	biological_process	10	1	339	4	9238	0.138922
GO:0002669	positive regulation of T cell anergy	biological_process	9	1	339	4	9238	0.138922
GO:0000904	cell morphogenesis involved in differentiation	biological_process	7	1	339	4	9238	0.138922
GO:0099563	modification of synaptic structure	biological_process	6	1	339	4	9238	0.138922
GO:1903527	positive regulation of membrane tubulation	biological_process	8	1	339	4	9238	0.138922
GO:0035877	death effector domain binding	molecular_function	6	1	339	4	9238	0.138922
GO:0006751	glutathione catabolic process	biological_process	9	1	339	4	9238	0.138922
GO:0034088	maintenance of mitotic sister chromatid cohesion	biological_process	6	1	339	4	9238	0.138922
GO:0061031	endodermal digestive tract morphogenesis	biological_process	7	1	339	4	9238	0.138922
GO:0072656	maintenance of protein location in mitochondrion	biological_process	8	1	339	4	9238	0.138922
GO:0050864	regulation of B cell activation	biological_process	8	1	339	4	9238	0.138922
GO:0050965	detection of temperature stimulus involved in sensory perception of pain	biological_process	8	1	339	4	9238	0.138922
GO:0030592	DNA ADP-ribosylation	biological_process	9	1	339	4	9238	0.138922
GO:0099527	postsynapse to nucleus signaling pathway	biological_process	6	1	339	4	9238	0.138922
GO:0010256	endomembrane system organization	biological_process	5	1	339	4	9238	0.138922
GO:0046881	positive regulation of follicle-stimulating hormone secretion	biological_process	10	1	339	4	9238	0.138922
GO:1903707	negative regulation of hemopoiesis	biological_process	7	1	339	4	9238	0.138922
GO:0010001	glial cell differentiation	biological_process	6	1	339	4	9238	0.138922
GO:0002430	complement receptor mediated signaling pathway	biological_process	7	1	339	4	9238	0.138922
GO:0032596	protein transport into membrane raft	biological_process	12	1	339	4	9238	0.138922
GO:0033081	regulation of T cell differentiation in thymus	biological_process	10	1	339	4	9238	0.138922
GO:0071403	cellular response to high density lipoprotein particle stimulus	biological_process	6	1	339	4	9238	0.138922
GO:1903923	positive regulation of protein processing in phagocytic vesicle	biological_process	11	1	339	4	9238	0.138922
GO:0036462	TRAIL-activated apoptotic signaling pathway	biological_process	8	1	339	4	9238	0.138922
GO:0008015	blood circulation	biological_process	6	1	339	4	9238	0.138922
GO:0050920	regulation of chemotaxis	biological_process	7	1	339	4	9238	0.138922
GO:0061000	negative regulation of dendritic spine development	biological_process	13	1	339	4	9238	0.138922
GO:0033233	regulation of protein sumoylation	biological_process	10	1	339	4	9238	0.138922
GO:0061029	eyelid development in camera-type eye	biological_process	5	1	339	4	9238	0.138922
GO:0097199	cysteine-type endopeptidase activity involved in apoptotic signaling pathway	molecular_function	10	1	339	4	9238	0.138922
GO:0016717	oxidoreductase activity, acting on paired donors, with oxidation of a pair of donors resulting in the reduction of molecular oxygen to two molecules of water	molecular_function	6	1	339	4	9238	0.138922
GO:0005042	netrin receptor activity	molecular_function	6	1	339	4	9238	0.138922
GO:0071276	cellular response to cadmium ion	biological_process	8	2	339	18	9238	0.139836
GO:0008361	regulation of cell size	biological_process	6	2	339	18	9238	0.139836
GO:0051018	protein kinase A binding	molecular_function	5	2	339	18	9238	0.139836
GO:0009925	basal plasma membrane	cellular_component	5	2	339	18	9238	0.139836
GO:0032968	positive regulation of transcription elongation from RNA polymerase II promoter	biological_process	11	2	339	18	9238	0.139836
GO:0046039	GTP metabolic process	biological_process	11	2	339	18	9238	0.139836
GO:0006911	phagocytosis, engulfment	biological_process	8	2	339	18	9238	0.139836
GO:0018107	peptidyl-threonine phosphorylation	biological_process	10	4	339	55	9238	0.142243
GO:0030218	erythrocyte differentiation	biological_process	7	3	339	36	9238	0.14442
GO:0005902	microvillus	cellular_component	7	3	339	36	9238	0.14442
GO:0000902	cell morphogenesis	biological_process	6	4	339	56	9238	0.149052
GO:0043197	dendritic spine	cellular_component	7	4	339	56	9238	0.149052
GO:0035023	regulation of Rho protein signal transduction	biological_process	11	5	339	77	9238	0.15203
GO:0048013	ephrin receptor signaling pathway	biological_process	8	2	339	19	9238	0.152678
GO:0007257	activation of JUN kinase activity	biological_process	14	2	339	19	9238	0.152678
GO:0034237	protein kinase A regulatory subunit binding	molecular_function	6	2	339	19	9238	0.152678
GO:0001942	hair follicle development	biological_process	6	2	339	19	9238	0.152678
GO:0044344	cellular response to fibroblast growth factor stimulus	biological_process	8	2	339	19	9238	0.152678
GO:0046875	ephrin receptor binding	molecular_function	6	2	339	19	9238	0.152678
GO:0070062	extracellular exosome	cellular_component	7	3	339	37	9238	0.153154
GO:0016459	myosin complex	cellular_component	4	3	339	37	9238	0.153154
GO:0007519	skeletal muscle tissue development	biological_process	8	3	339	37	9238	0.153154
GO:0097191	extrinsic apoptotic signaling pathway	biological_process	6	3	339	37	9238	0.153154
GO:1990904	ribonucleoprotein complex	cellular_component	4	6	339	99	9238	0.155779
GO:0001784	phosphotyrosine residue binding	molecular_function	7	3	339	38	9238	0.162051
GO:0120163	negative regulation of cold-induced thermogenesis	biological_process	7	3	339	38	9238	0.162051
GO:0000980	RNA polymerase II distal enhancer sequence-specific DNA binding	molecular_function	10	4	339	58	9238	0.163033
GO:0043231	intracellular membrane-bounded organelle	cellular_component	5	21	339	455	9238	0.164499
GO:0045747	positive regulation of Notch signaling pathway	biological_process	9	2	339	20	9238	0.165737
GO:0034612	response to tumor necrosis factor	biological_process	7	2	339	20	9238	0.165737
GO:0048856	anatomical structure development	biological_process	4	2	339	20	9238	0.165737
GO:0006509	membrane protein ectodomain proteolysis	biological_process	9	2	339	20	9238	0.165737
GO:0042744	hydrogen peroxide catabolic process	biological_process	8	2	339	20	9238	0.165737
GO:0048741	skeletal muscle fiber development	biological_process	9	2	339	20	9238	0.165737
GO:0002102	podosome	cellular_component	4	2	339	20	9238	0.165737
GO:0051281	positive regulation of release of sequestered calcium ion into cytosol	biological_process	15	2	339	20	9238	0.165737
GO:0071480	cellular response to gamma radiation	biological_process	8	2	339	20	9238	0.165737
GO:0030010	establishment of cell polarity	biological_process	5	2	339	20	9238	0.165737
GO:0008283	cell population proliferation	biological_process	3	6	339	101	9238	0.166255
GO:0009986	cell surface	cellular_component	4	13	339	262	9238	0.166414
GO:0045454	cell redox homeostasis	biological_process	5	4	339	59	9238	0.170195
GO:0032869	cellular response to insulin stimulus	biological_process	8	4	339	59	9238	0.170195
GO:0060042	retina morphogenesis in camera-type eye	biological_process	5	1	339	5	9238	0.170534
GO:0005989	lactose biosynthetic process	biological_process	9	1	339	5	9238	0.170534
GO:0005663	DNA replication factor C complex	cellular_component	4	1	339	5	9238	0.170534
GO:1900264	positive regulation of DNA-directed DNA polymerase activity	biological_process	8	1	339	5	9238	0.170534
GO:0032287	peripheral nervous system myelin maintenance	biological_process	8	1	339	5	9238	0.170534
GO:0042289	MHC class II protein binding	molecular_function	7	1	339	5	9238	0.170534
GO:0090168	Golgi reassembly	biological_process	7	1	339	5	9238	0.170534
GO:0034121	regulation of toll-like receptor signaling pathway	biological_process	8	1	339	5	9238	0.170534
GO:0060836	lymphatic endothelial cell differentiation	biological_process	8	1	339	5	9238	0.170534
GO:0047498	calcium-dependent phospholipase A2 activity	molecular_function	9	1	339	5	9238	0.170534
GO:0043274	phospholipase binding	molecular_function	6	1	339	5	9238	0.170534
GO:2000620	positive regulation of histone H4-K16 acetylation	biological_process	13	1	339	5	9238	0.170534
GO:0034979	NAD-dependent protein deacetylase activity	molecular_function	7	1	339	5	9238	0.170534
GO:0035174	histone serine kinase activity	molecular_function	9	1	339	5	9238	0.170534
GO:0031281	positive regulation of cyclase activity	biological_process	7	1	339	5	9238	0.170534
GO:0050665	hydrogen peroxide biosynthetic process	biological_process	8	1	339	5	9238	0.170534
GO:0004950	chemokine receptor activity	molecular_function	8	1	339	5	9238	0.170534
GO:0061009	common bile duct development	biological_process	6	1	339	5	9238	0.170534
GO:0031669	cellular response to nutrient levels	biological_process	7	1	339	5	9238	0.170534
GO:0001706	endoderm formation	biological_process	6	1	339	5	9238	0.170534
GO:1990112	RQC complex	cellular_component	4	1	339	5	9238	0.170534
GO:0004768	stearoyl-CoA 9-desaturase activity	molecular_function	8	1	339	5	9238	0.170534
GO:0031063	regulation of histone deacetylation	biological_process	10	1	339	5	9238	0.170534
GO:0070125	mitochondrial translational elongation	biological_process	9	1	339	5	9238	0.170534
GO:0035720	intraciliary anterograde transport	biological_process	8	1	339	5	9238	0.170534
GO:0018312	peptidyl-serine ADP-ribosylation	biological_process	10	1	339	5	9238	0.170534
GO:0070180	large ribosomal subunit rRNA binding	molecular_function	8	1	339	5	9238	0.170534
GO:0014005	microglia development	biological_process	7	1	339	5	9238	0.170534
GO:0048617	embryonic foregut morphogenesis	biological_process	6	1	339	5	9238	0.170534
GO:2000467	positive regulation of glycogen (starch) synthase activity	biological_process	8	1	339	5	9238	0.170534
GO:0072655	establishment of protein localization to mitochondrion	biological_process	9	1	339	5	9238	0.170534
GO:0031081	nuclear pore distribution	biological_process	7	1	339	5	9238	0.170534
GO:0007202	activation of phospholipase C activity	biological_process	11	1	339	5	9238	0.170534
GO:0032488	Cdc42 protein signal transduction	biological_process	9	1	339	5	9238	0.170534
GO:0002184	cytoplasmic translational termination	biological_process	9	1	339	5	9238	0.170534
GO:0034362	low-density lipoprotein particle	cellular_component	5	1	339	5	9238	0.170534
GO:0060087	relaxation of vascular smooth muscle	biological_process	8	1	339	5	9238	0.170534
GO:0030120	vesicle coat	cellular_component	7	1	339	5	9238	0.170534
GO:0007493	endodermal cell fate determination	biological_process	6	1	339	5	9238	0.170534
GO:0050916	sensory perception of sweet taste	biological_process	9	1	339	5	9238	0.170534
GO:0042834	peptidoglycan binding	molecular_function	6	1	339	5	9238	0.170534
GO:0043497	regulation of protein heterodimerization activity	biological_process	7	1	339	5	9238	0.170534
GO:0048386	positive regulation of retinoic acid receptor signaling pathway	biological_process	9	1	339	5	9238	0.170534
GO:0050687	negative regulation of defense response to virus	biological_process	8	1	339	5	9238	0.170534
GO:0033564	anterior/posterior axon guidance	biological_process	7	1	339	5	9238	0.170534
GO:0032649	regulation of interferon-gamma production	biological_process	7	1	339	5	9238	0.170534
GO:0043315	positive regulation of neutrophil degranulation	biological_process	10	1	339	5	9238	0.170534
GO:0070671	response to interleukin-12	biological_process	7	1	339	5	9238	0.170534
GO:0002639	positive regulation of immunoglobulin production	biological_process	9	1	339	5	9238	0.170534
GO:0050650	chondroitin sulfate proteoglycan biosynthetic process	biological_process	10	1	339	5	9238	0.170534
GO:0032386	regulation of intracellular transport	biological_process	7	1	339	5	9238	0.170534
GO:0042711	maternal behavior	biological_process	6	1	339	5	9238	0.170534
GO:0008106	alcohol dehydrogenase (NADP+) activity	molecular_function	8	1	339	5	9238	0.170534
GO:0031433	telethonin binding	molecular_function	6	1	339	5	9238	0.170534
GO:0033014	tetrapyrrole biosynthetic process	biological_process	7	1	339	5	9238	0.170534
GO:0060501	positive regulation of epithelial cell proliferation involved in lung morphogenesis	biological_process	9	1	339	5	9238	0.170534
GO:0034144	negative regulation of toll-like receptor 4 signaling pathway	biological_process	8	1	339	5	9238	0.170534
GO:1904428	negative regulation of tubulin deacetylation	biological_process	10	1	339	5	9238	0.170534
GO:0018444	translation release factor complex	cellular_component	4	1	339	5	9238	0.170534
GO:0042118	endothelial cell activation	biological_process	5	1	339	5	9238	0.170534
GO:0016032	viral process	biological_process	6	1	339	5	9238	0.170534
GO:0003344	pericardium morphogenesis	biological_process	8	1	339	5	9238	0.170534
GO:0007296	vitellogenesis	biological_process	6	1	339	5	9238	0.170534
GO:0097011	cellular response to granulocyte macrophage colony-stimulating factor stimulus	biological_process	8	1	339	5	9238	0.170534
GO:1901874	negative regulation of post-translational protein modification	biological_process	10	1	339	5	9238	0.170534
GO:0035087	siRNA loading onto RISC involved in RNA interference	biological_process	10	1	339	5	9238	0.170534
GO:0034374	low-density lipoprotein particle remodeling	biological_process	9	1	339	5	9238	0.170534
GO:0033592	RNA strand annealing activity	molecular_function	8	1	339	5	9238	0.170534
GO:0070849	response to epidermal growth factor	biological_process	5	1	339	5	9238	0.170534
GO:0010518	positive regulation of phospholipase activity	biological_process	9	1	339	5	9238	0.170534
GO:0035810	positive regulation of urine volume	biological_process	7	1	339	5	9238	0.170534
GO:0099645	neurotransmitter receptor localization to postsynaptic specialization membrane	biological_process	8	1	339	5	9238	0.170534
GO:0061643	chemorepulsion of axon	biological_process	7	1	339	5	9238	0.170534
GO:0035305	negative regulation of dephosphorylation	biological_process	10	1	339	5	9238	0.170534
GO:0097470	ribbon synapse	cellular_component	4	1	339	5	9238	0.170534
GO:0070105	positive regulation of interleukin-6-mediated signaling pathway	biological_process	10	1	339	5	9238	0.170534
GO:0004300	enoyl-CoA hydratase activity	molecular_function	7	1	339	5	9238	0.170534
GO:0035727	lysophosphatidic acid binding	molecular_function	6	1	339	5	9238	0.170534
GO:0006972	hyperosmotic response	biological_process	6	1	339	5	9238	0.170534
GO:0072344	rescue of stalled ribosome	biological_process	9	1	339	5	9238	0.170534
GO:0035404	histone-serine phosphorylation	biological_process	11	1	339	5	9238	0.170534
GO:0003161	cardiac conduction system development	biological_process	9	1	339	5	9238	0.170534
GO:0017146	NMDA selective glutamate receptor complex	cellular_component	8	1	339	5	9238	0.170534
GO:0031731	CCR6 chemokine receptor binding	molecular_function	9	1	339	5	9238	0.170534
GO:0034165	positive regulation of toll-like receptor 9 signaling pathway	biological_process	10	1	339	5	9238	0.170534
GO:1990763	arrestin family protein binding	molecular_function	5	1	339	5	9238	0.170534
GO:0015760	glucose-6-phosphate transport	biological_process	9	1	339	5	9238	0.170534
GO:0061951	establishment of protein localization to plasma membrane	biological_process	9	1	339	5	9238	0.170534
GO:0045906	negative regulation of vasoconstriction	biological_process	10	1	339	5	9238	0.170534
GO:0033192	calmodulin-dependent protein phosphatase activity	molecular_function	11	1	339	5	9238	0.170534
GO:0005782	peroxisomal matrix	cellular_component	8	1	339	5	9238	0.170534
GO:0005732	small nucleolar ribonucleoprotein complex	cellular_component	5	1	339	5	9238	0.170534
GO:0003831	beta-N-acetylglucosaminylglycopeptide beta-1,4-galactosyltransferase activity	molecular_function	8	1	339	5	9238	0.170534
GO:0035239	tube morphogenesis	biological_process	5	1	339	5	9238	0.170534
GO:0002755	MyD88-dependent toll-like receptor signaling pathway	biological_process	9	1	339	5	9238	0.170534
GO:0099523	presynaptic cytosol	cellular_component	4	1	339	5	9238	0.170534
GO:0018126	protein hydroxylation	biological_process	9	1	339	5	9238	0.170534
GO:0048664	neuron fate determination	biological_process	6	1	339	5	9238	0.170534
GO:0001939	female pronucleus	cellular_component	8	1	339	5	9238	0.170534
GO:0004826	phenylalanine-tRNA ligase activity	molecular_function	7	1	339	5	9238	0.170534
GO:0001580	detection of chemical stimulus involved in sensory perception of bitter taste	biological_process	8	1	339	5	9238	0.170534
GO:0060086	circadian temperature homeostasis	biological_process	6	1	339	5	9238	0.170534
GO:0004705	JUN kinase activity	molecular_function	11	1	339	5	9238	0.170534
GO:0016597	amino acid binding	molecular_function	7	1	339	5	9238	0.170534
GO:0004461	lactose synthase activity	molecular_function	8	1	339	5	9238	0.170534
GO:0070493	thrombin-activated receptor signaling pathway	biological_process	6	1	339	5	9238	0.170534
GO:1990116	ribosome-associated ubiquitin-dependent protein catabolic process	biological_process	12	1	339	5	9238	0.170534
GO:0051572	negative regulation of histone H3-K4 methylation	biological_process	12	1	339	5	9238	0.170534
GO:0030165	PDZ domain binding	molecular_function	6	3	339	39	9238	0.171099
GO:0043123	positive regulation of I-kappaB kinase/NF-kappaB signaling	biological_process	10	6	339	102	9238	0.171603
GO:0005759	mitochondrial matrix	cellular_component	7	5	339	81	9238	0.176087
GO:0008217	regulation of blood pressure	biological_process	5	2	339	21	9238	0.178981
GO:0030016	myofibril	cellular_component	7	2	339	21	9238	0.178981
GO:0051016	barbed-end actin filament capping	biological_process	11	2	339	21	9238	0.178981
GO:0005507	copper ion binding	molecular_function	8	3	339	40	9238	0.180287
GO:0030307	positive regulation of cell growth	biological_process	7	3	339	40	9238	0.180287
GO:0071356	cellular response to tumor necrosis factor	biological_process	8	4	339	61	9238	0.184841
GO:0045444	fat cell differentiation	biological_process	6	3	339	41	9238	0.189606
GO:0045665	negative regulation of neuron differentiation	biological_process	10	3	339	41	9238	0.189606
GO:0048589	developmental growth	biological_process	4	2	339	22	9238	0.192379
GO:0032580	Golgi cisterna membrane	cellular_component	8	2	339	22	9238	0.192379
GO:0006826	iron ion transport	biological_process	10	2	339	22	9238	0.192379
GO:0050853	B cell receptor signaling pathway	biological_process	8	2	339	22	9238	0.192379
GO:0015297	antiporter activity	molecular_function	7	2	339	22	9238	0.192379
GO:0001772	immunological synapse	cellular_component	5	2	339	22	9238	0.192379
GO:0004601	peroxidase activity	molecular_function	4	2	339	22	9238	0.192379
GO:0031234	extrinsic component of cytoplasmic side of plasma membrane	cellular_component	6	3	339	42	9238	0.199045
GO:0030036	actin cytoskeleton organization	biological_process	7	6	339	107	9238	0.199364
GO:0030346	protein phosphatase 2B binding	molecular_function	8	1	339	6	9238	0.200989
GO:0044387	negative regulation of protein kinase activity by regulation of protein phosphorylation	biological_process	12	1	339	6	9238	0.200989
GO:0002064	epithelial cell development	biological_process	6	1	339	6	9238	0.200989
GO:0044305	calyx of Held	cellular_component	7	1	339	6	9238	0.200989
GO:0070213	protein auto-ADP-ribosylation	biological_process	10	1	339	6	9238	0.200989
GO:1903829	positive regulation of cellular protein localization	biological_process	6	1	339	6	9238	0.200989
GO:0002262	myeloid cell homeostasis	biological_process	4	1	339	6	9238	0.200989
GO:0010668	ectodermal cell differentiation	biological_process	6	1	339	6	9238	0.200989
GO:0021695	cerebellar cortex development	biological_process	5	1	339	6	9238	0.200989
GO:0050725	positive regulation of interleukin-1 beta biosynthetic process	biological_process	10	1	339	6	9238	0.200989
GO:0030903	notochord development	biological_process	7	1	339	6	9238	0.200989
GO:2000510	positive regulation of dendritic cell chemotaxis	biological_process	9	1	339	6	9238	0.200989
GO:0072307	regulation of metanephric nephron tubule epithelial cell differentiation	biological_process	10	1	339	6	9238	0.200989
GO:0007190	activation of adenylate cyclase activity	biological_process	6	1	339	6	9238	0.200989
GO:0010837	regulation of keratinocyte proliferation	biological_process	8	1	339	6	9238	0.200989
GO:0061617	MICOS complex	cellular_component	6	1	339	6	9238	0.200989
GO:0120020	intermembrane cholesterol transfer activity	molecular_function	7	1	339	6	9238	0.200989
GO:0071354	cellular response to interleukin-6	biological_process	8	1	339	6	9238	0.200989
GO:0030676	Rac guanyl-nucleotide exchange factor activity	molecular_function	10	1	339	6	9238	0.200989
GO:0004301	epoxide hydrolase activity	molecular_function	7	1	339	6	9238	0.200989
GO:0031987	locomotion involved in locomotory behavior	biological_process	4	1	339	6	9238	0.200989
GO:0014706	striated muscle tissue development	biological_process	7	1	339	6	9238	0.200989
GO:0044598	doxorubicin metabolic process	biological_process	6	1	339	6	9238	0.200989
GO:1902414	protein localization to cell junction	biological_process	6	1	339	6	9238	0.200989
GO:0004396	hexokinase activity	molecular_function	7	1	339	6	9238	0.200989
GO:0120011	intermembrane sterol transfer	biological_process	9	1	339	6	9238	0.200989
GO:0003186	tricuspid valve morphogenesis	biological_process	7	1	339	6	9238	0.200989
GO:0004712	protein serine/threonine/tyrosine kinase activity	molecular_function	8	1	339	6	9238	0.200989
GO:0006388	tRNA splicing, via endonucleolytic cleavage and ligation	biological_process	12	1	339	6	9238	0.200989
GO:2001242	regulation of intrinsic apoptotic signaling pathway	biological_process	9	1	339	6	9238	0.200989
GO:0006012	galactose metabolic process	biological_process	8	1	339	6	9238	0.200989
GO:0030224	monocyte differentiation	biological_process	8	1	339	6	9238	0.200989
GO:0030641	regulation of cellular pH	biological_process	11	1	339	6	9238	0.200989
GO:0045577	regulation of B cell differentiation	biological_process	9	1	339	6	9238	0.200989
GO:0060077	inhibitory synapse	cellular_component	4	1	339	6	9238	0.200989
GO:0000322	storage vacuole	cellular_component	7	1	339	6	9238	0.200989
GO:0010960	magnesium ion homeostasis	biological_process	10	1	339	6	9238	0.200989
GO:0003689	DNA clamp loader activity	molecular_function	7	1	339	6	9238	0.200989
GO:0042407	cristae formation	biological_process	9	1	339	6	9238	0.200989
GO:0031369	translation initiation factor binding	molecular_function	5	1	339	6	9238	0.200989
GO:2000617	positive regulation of histone H3-K9 acetylation	biological_process	12	1	339	6	9238	0.200989
GO:0002741	positive regulation of cytokine secretion involved in immune response	biological_process	9	1	339	6	9238	0.200989
GO:0030898	actin-dependent ATPase activity	molecular_function	11	1	339	6	9238	0.200989
GO:0004340	glucokinase activity	molecular_function	8	1	339	6	9238	0.200989
GO:0060840	artery development	biological_process	6	1	339	6	9238	0.200989
GO:0050872	white fat cell differentiation	biological_process	7	1	339	6	9238	0.200989
GO:0008090	retrograde axonal transport	biological_process	11	1	339	6	9238	0.200989
GO:0031404	chloride ion binding	molecular_function	6	1	339	6	9238	0.200989
GO:0045060	negative thymic T cell selection	biological_process	6	1	339	6	9238	0.200989
GO:0072678	T cell migration	biological_process	6	1	339	6	9238	0.200989
GO:0060350	endochondral bone morphogenesis	biological_process	7	1	339	6	9238	0.200989
GO:0051683	establishment of Golgi localization	biological_process	7	1	339	6	9238	0.200989
GO:0097322	7SK snRNA binding	molecular_function	8	1	339	6	9238	0.200989
GO:0032506	cytokinetic process	biological_process	5	1	339	6	9238	0.200989
GO:0019956	chemokine binding	molecular_function	6	1	339	6	9238	0.200989
GO:1900364	negative regulation of mRNA polyadenylation	biological_process	11	1	339	6	9238	0.200989
GO:0008622	epsilon DNA polymerase complex	cellular_component	6	1	339	6	9238	0.200989
GO:0045078	positive regulation of interferon-gamma biosynthetic process	biological_process	9	1	339	6	9238	0.200989
GO:0045416	positive regulation of interleukin-8 biosynthetic process	biological_process	9	1	339	6	9238	0.200989
GO:0099576	regulation of protein catabolic process at postsynapse, modulating synaptic transmission	biological_process	8	1	339	6	9238	0.200989
GO:0001731	formation of translation preinitiation complex	biological_process	9	1	339	6	9238	0.200989
GO:0032640	tumor necrosis factor production	biological_process	6	1	339	6	9238	0.200989
GO:0048149	behavioral response to ethanol	biological_process	5	1	339	6	9238	0.200989
GO:0060956	endocardial cell differentiation	biological_process	8	1	339	6	9238	0.200989
GO:0019158	mannokinase activity	molecular_function	8	1	339	6	9238	0.200989
GO:0097542	ciliary tip	cellular_component	5	1	339	6	9238	0.200989
GO:2000973	regulation of pro-B cell differentiation	biological_process	9	1	339	6	9238	0.200989
GO:0072577	endothelial cell apoptotic process	biological_process	8	1	339	6	9238	0.200989
GO:0016500	protein-hormone receptor activity	molecular_function	5	1	339	6	9238	0.200989
GO:0048368	lateral mesoderm development	biological_process	7	1	339	6	9238	0.200989
GO:0061418	regulation of transcription from RNA polymerase II promoter in response to hypoxia	biological_process	11	1	339	6	9238	0.200989
GO:0000470	maturation of LSU-rRNA	biological_process	12	1	339	6	9238	0.200989
GO:0038127	ERBB signaling pathway	biological_process	8	1	339	6	9238	0.200989
GO:0014850	response to muscle activity	biological_process	5	1	339	6	9238	0.200989
GO:0048038	quinone binding	molecular_function	5	1	339	6	9238	0.200989
GO:0031065	positive regulation of histone deacetylation	biological_process	11	1	339	6	9238	0.200989
GO:0003209	cardiac atrium morphogenesis	biological_process	6	1	339	6	9238	0.200989
GO:0034137	positive regulation of toll-like receptor 2 signaling pathway	biological_process	10	1	339	6	9238	0.200989
GO:0070212	protein poly-ADP-ribosylation	biological_process	10	1	339	6	9238	0.200989
GO:0030203	glycosaminoglycan metabolic process	biological_process	7	1	339	6	9238	0.200989
GO:0071681	cellular response to indole-3-methanol	biological_process	7	1	339	6	9238	0.200989
GO:0042976	activation of Janus kinase activity	biological_process	11	1	339	6	9238	0.200989
GO:0003334	keratinocyte development	biological_process	7	1	339	6	9238	0.200989
GO:2000048	negative regulation of cell-cell adhesion mediated by cadherin	biological_process	8	1	339	6	9238	0.200989
GO:0044597	daunorubicin metabolic process	biological_process	6	1	339	6	9238	0.200989
GO:0005522	profilin binding	molecular_function	5	1	339	6	9238	0.200989
GO:1903351	cellular response to dopamine	biological_process	7	1	339	6	9238	0.200989
GO:0016569	covalent chromatin modification	biological_process	6	1	339	6	9238	0.200989
GO:1902177	positive regulation of oxidative stress-induced intrinsic apoptotic signaling pathway	biological_process	9	1	339	6	9238	0.200989
GO:0008865	fructokinase activity	molecular_function	8	1	339	6	9238	0.200989
GO:1901796	regulation of signal transduction by p53 class mediator	biological_process	9	1	339	6	9238	0.200989
GO:0030532	small nuclear ribonucleoprotein complex	cellular_component	6	1	339	6	9238	0.200989
GO:0001102	RNA polymerase II activating transcription factor binding	molecular_function	8	2	339	23	9238	0.205901
GO:0006612	protein targeting to membrane	biological_process	12	2	339	23	9238	0.205901
GO:0006641	triglyceride metabolic process	biological_process	9	2	339	23	9238	0.205901
GO:0010971	positive regulation of G2/M transition of mitotic cell cycle	biological_process	10	2	339	23	9238	0.205901
GO:0055072	iron ion homeostasis	biological_process	11	2	339	23	9238	0.205901
GO:0005245	voltage-gated calcium channel activity	molecular_function	9	2	339	23	9238	0.205901
GO:0007286	spermatid development	biological_process	6	4	339	64	9238	0.207534
GO:0047485	protein N-terminus binding	molecular_function	5	4	339	64	9238	0.207534
GO:0010951	negative regulation of endopeptidase activity	biological_process	11	4	339	64	9238	0.207534
GO:0007623	circadian rhythm	biological_process	4	3	339	44	9238	0.218242
GO:0071277	cellular response to calcium ion	biological_process	8	3	339	44	9238	0.218242
GO:0003743	translation initiation factor activity	molecular_function	8	3	339	44	9238	0.218242
GO:0000118	histone deacetylase complex	cellular_component	7	2	339	24	9238	0.219522
GO:0035257	nuclear hormone receptor binding	molecular_function	7	2	339	24	9238	0.219522
GO:0031901	early endosome membrane	cellular_component	9	2	339	24	9238	0.219522
GO:0031032	actomyosin structure organization	biological_process	8	2	339	24	9238	0.219522
GO:0008089	anterograde axonal transport	biological_process	11	2	339	24	9238	0.219522
GO:0000785	chromatin	cellular_component	6	5	339	88	9238	0.221284
GO:0031490	chromatin DNA binding	molecular_function	7	3	339	45	9238	0.22798
GO:0017048	Rho GTPase binding	molecular_function	9	3	339	45	9238	0.22798
GO:0043199	sulfate binding	molecular_function	6	1	339	7	9238	0.230329
GO:0098821	BMP receptor activity	molecular_function	10	1	339	7	9238	0.230329
GO:0030277	maintenance of gastrointestinal epithelium	biological_process	9	1	339	7	9238	0.230329
GO:0070761	pre-snoRNP complex	cellular_component	5	1	339	7	9238	0.230329
GO:0001094	TFIID-class transcription factor complex binding	molecular_function	8	1	339	7	9238	0.230329
GO:0031390	Ctf18 RFC-like complex	cellular_component	4	1	339	7	9238	0.230329
GO:0061626	pharyngeal arch artery morphogenesis	biological_process	8	1	339	7	9238	0.230329
GO:0050673	epithelial cell proliferation	biological_process	4	1	339	7	9238	0.230329
GO:0009404	toxin metabolic process	biological_process	5	1	339	7	9238	0.230329
GO:0048254	snoRNA localization	biological_process	6	1	339	7	9238	0.230329
GO:0051647	nucleus localization	biological_process	6	1	339	7	9238	0.230329
GO:0016241	regulation of macroautophagy	biological_process	9	1	339	7	9238	0.230329
GO:0005849	mRNA cleavage factor complex	cellular_component	4	1	339	7	9238	0.230329
GO:0031124	mRNA 3'-end processing	biological_process	11	1	339	7	9238	0.230329
GO:0005026	transforming growth factor beta receptor activity, type II	molecular_function	11	1	339	7	9238	0.230329
GO:0003177	pulmonary valve development	biological_process	7	1	339	7	9238	0.230329
GO:0002606	positive regulation of dendritic cell antigen processing and presentation	biological_process	8	1	339	7	9238	0.230329
GO:0042641	actomyosin	cellular_component	6	1	339	7	9238	0.230329
GO:0046886	positive regulation of hormone biosynthetic process	biological_process	9	1	339	7	9238	0.230329
GO:0140289	protein mono-ADP-ribosylation	biological_process	10	1	339	7	9238	0.230329
GO:0045927	positive regulation of growth	biological_process	6	1	339	7	9238	0.230329
GO:0032786	positive regulation of DNA-templated transcription, elongation	biological_process	10	1	339	7	9238	0.230329
GO:0032432	actin filament bundle	cellular_component	6	1	339	7	9238	0.230329
GO:0007042	lysosomal lumen acidification	biological_process	14	1	339	7	9238	0.230329
GO:0060487	lung epithelial cell differentiation	biological_process	7	1	339	7	9238	0.230329
GO:0030423	targeting of mRNA for destruction involved in RNA interference	biological_process	9	1	339	7	9238	0.230329
GO:0014002	astrocyte development	biological_process	7	1	339	7	9238	0.230329
GO:0046833	positive regulation of RNA export from nucleus	biological_process	9	1	339	7	9238	0.230329
GO:1902459	positive regulation of stem cell population maintenance	biological_process	7	1	339	7	9238	0.230329
GO:0035584	calcium-mediated signaling using intracellular calcium source	biological_process	8	1	339	7	9238	0.230329
GO:0035435	phosphate ion transmembrane transport	biological_process	10	1	339	7	9238	0.230329
GO:0001768	establishment of T cell polarity	biological_process	7	1	339	7	9238	0.230329
GO:0042562	hormone binding	molecular_function	4	1	339	7	9238	0.230329
GO:0008206	bile acid metabolic process	biological_process	7	1	339	7	9238	0.230329
GO:0071933	Arp2/3 complex binding	molecular_function	5	1	339	7	9238	0.230329
GO:0044729	hemi-methylated DNA-binding	molecular_function	8	1	339	7	9238	0.230329
GO:0051574	positive regulation of histone H3-K9 methylation	biological_process	12	1	339	7	9238	0.230329
GO:0031258	lamellipodium membrane	cellular_component	6	1	339	7	9238	0.230329
GO:0003176	aortic valve development	biological_process	7	1	339	7	9238	0.230329
GO:0016004	phospholipase activator activity	molecular_function	7	1	339	7	9238	0.230329
GO:0007258	JUN phosphorylation	biological_process	10	1	339	7	9238	0.230329
GO:0048599	oocyte development	biological_process	6	1	339	7	9238	0.230329
GO:0060440	trachea formation	biological_process	6	1	339	7	9238	0.230329
GO:0008140	cAMP response element binding protein binding	molecular_function	7	1	339	7	9238	0.230329
GO:0048747	muscle fiber development	biological_process	8	1	339	7	9238	0.230329
GO:0019227	neuronal action potential propagation	biological_process	6	1	339	7	9238	0.230329
GO:0060052	neurofilament cytoskeleton organization	biological_process	8	1	339	7	9238	0.230329
GO:0016471	vacuolar proton-transporting V-type ATPase complex	cellular_component	7	1	339	7	9238	0.230329
GO:0046965	retinoid X receptor binding	molecular_function	9	1	339	7	9238	0.230329
GO:0003747	translation release factor activity	molecular_function	9	1	339	7	9238	0.230329
GO:0061564	axon development	biological_process	8	1	339	7	9238	0.230329
GO:0035313	wound healing, spreading of epidermal cells	biological_process	8	1	339	7	9238	0.230329
GO:0010591	regulation of lamellipodium assembly	biological_process	10	1	339	7	9238	0.230329
GO:0045651	positive regulation of macrophage differentiation	biological_process	10	1	339	7	9238	0.230329
GO:0051764	actin crosslink formation	biological_process	7	1	339	7	9238	0.230329
GO:0051573	negative regulation of histone H3-K9 methylation	biological_process	12	1	339	7	9238	0.230329
GO:0000467	exonucleolytic trimming to generate mature 3'-end of 5.8S rRNA from tricistronic rRNA transcript (SSU-rRNA, 5.8S rRNA, LSU-rRNA	biological_process	12	1	339	7	9238	0.230329
GO:0019068	virion assembly	biological_process	7	1	339	7	9238	0.230329
GO:0019957	C-C chemokine binding	molecular_function	7	1	339	7	9238	0.230329
GO:0009083	branched-chain amino acid catabolic process	biological_process	10	1	339	7	9238	0.230329
GO:0003197	endocardial cushion development	biological_process	7	1	339	7	9238	0.230329
GO:0043951	negative regulation of cAMP-mediated signaling	biological_process	10	1	339	7	9238	0.230329
GO:0051026	chiasma assembly	biological_process	6	1	339	7	9238	0.230329
GO:0030132	clathrin coat of coated pit	cellular_component	8	1	339	7	9238	0.230329
GO:0043495	protein membrane anchor	molecular_function	6	1	339	7	9238	0.230329
GO:0045080	positive regulation of chemokine biosynthetic process	biological_process	9	1	339	7	9238	0.230329
GO:1903393	positive regulation of adherens junction organization	biological_process	8	1	339	7	9238	0.230329
GO:0042473	outer ear morphogenesis	biological_process	6	1	339	7	9238	0.230329
GO:0010756	positive regulation of plasminogen activation	biological_process	11	1	339	7	9238	0.230329
GO:0005089	Rho guanyl-nucleotide exchange factor activity	molecular_function	9	4	339	67	9238	0.230975
GO:0030018	Z disc	cellular_component	5	4	339	67	9238	0.230975
GO:0030424	axon	cellular_component	6	7	339	136	9238	0.232509
GO:0019899	enzyme binding	molecular_function	5	11	339	232	9238	0.232838
GO:0009755	hormone-mediated signaling pathway	biological_process	5	2	339	25	9238	0.233214
GO:0000027	ribosomal large subunit assembly	biological_process	9	2	339	25	9238	0.233214
GO:0016491	oxidoreductase activity	molecular_function	4	14	339	307	9238	0.237756
GO:0005913	cell-cell adherens junction	cellular_component	5	3	339	46	9238	0.237799
GO:0007605	sensory perception of sound	biological_process	8	4	339	69	9238	0.246952
GO:0009749	response to glucose	biological_process	9	2	339	26	9238	0.246955
GO:0008266	poly(U) RNA binding	molecular_function	9	2	339	26	9238	0.246955
GO:0005515	protein binding	molecular_function	4	94	339	2403	9238	0.249522
GO:0000187	activation of MAPK activity	biological_process	13	3	339	48	9238	0.257641
GO:0019430	removal of superoxide radicals	biological_process	7	1	339	8	9238	0.258594
GO:0007260	tyrosine phosphorylation of STAT protein	biological_process	11	1	339	8	9238	0.258594
GO:0048643	positive regulation of skeletal muscle tissue development	biological_process	10	1	339	8	9238	0.258594
GO:0060294	cilium movement involved in cell motility	biological_process	7	1	339	8	9238	0.258594
GO:0030008	TRAPP complex	cellular_component	5	1	339	8	9238	0.258594
GO:0045921	positive regulation of exocytosis	biological_process	8	1	339	8	9238	0.258594
GO:0005798	Golgi-associated vesicle	cellular_component	7	1	339	8	9238	0.258594
GO:0007341	penetration of zona pellucida	biological_process	5	1	339	8	9238	0.258594
GO:0008024	cyclin/CDK positive transcription elongation factor complex	cellular_component	5	1	339	8	9238	0.258594
GO:0031996	thioesterase binding	molecular_function	6	1	339	8	9238	0.258594
GO:0006801	superoxide metabolic process	biological_process	6	1	339	8	9238	0.258594
GO:0070402	NADPH binding	molecular_function	6	1	339	8	9238	0.258594
GO:0006825	copper ion transport	biological_process	10	1	339	8	9238	0.258594
GO:0003917	DNA topoisomerase type I activity	molecular_function	6	1	339	8	9238	0.258594
GO:0035694	mitochondrial protein catabolic process	biological_process	9	1	339	8	9238	0.258594
GO:0019511	peptidyl-proline hydroxylation	biological_process	10	1	339	8	9238	0.258594
GO:0006024	glycosaminoglycan biosynthetic process	biological_process	8	1	339	8	9238	0.258594
GO:0038092	nodal signaling pathway	biological_process	9	1	339	8	9238	0.258594
GO:0003015	heart process	biological_process	6	1	339	8	9238	0.258594
GO:0035308	negative regulation of protein dephosphorylation	biological_process	10	1	339	8	9238	0.258594
GO:0098831	presynaptic active zone cytoplasmic component	cellular_component	4	1	339	8	9238	0.258594
GO:0042975	peroxisome proliferator activated receptor binding	molecular_function	6	1	339	8	9238	0.258594
GO:1902043	positive regulation of extrinsic apoptotic signaling pathway via death domain receptors	biological_process	11	1	339	8	9238	0.258594
GO:0031527	filopodium membrane	cellular_component	6	1	339	8	9238	0.258594
GO:0030057	desmosome	cellular_component	5	1	339	8	9238	0.258594
GO:0051482	positive regulation of cytosolic calcium ion concentration involved in phospholipase C-activating G protein-coupled signaling pathway	biological_process	14	1	339	8	9238	0.258594
GO:0042116	macrophage activation	biological_process	7	1	339	8	9238	0.258594
GO:0085020	protein K6-linked ubiquitination	biological_process	13	1	339	8	9238	0.258594
GO:0000347	THO complex	cellular_component	4	1	339	8	9238	0.258594
GO:0044320	cellular response to leptin stimulus	biological_process	7	1	339	8	9238	0.258594
GO:0050871	positive regulation of B cell activation	biological_process	9	1	339	8	9238	0.258594
GO:1904469	positive regulation of tumor necrosis factor secretion	biological_process	10	1	339	8	9238	0.258594
GO:0097084	vascular smooth muscle cell development	biological_process	7	1	339	8	9238	0.258594
GO:0042789	mRNA transcription by RNA polymerase II	biological_process	10	1	339	8	9238	0.258594
GO:0050710	negative regulation of cytokine secretion	biological_process	8	1	339	8	9238	0.258594
GO:0032009	early phagosome	cellular_component	9	1	339	8	9238	0.258594
GO:0032784	regulation of DNA-templated transcription, elongation	biological_process	9	1	339	8	9238	0.258594
GO:0031090	organelle membrane	cellular_component	4	1	339	8	9238	0.258594
GO:0006662	glycerol ether metabolic process	biological_process	6	1	339	8	9238	0.258594
GO:0044030	regulation of DNA methylation	biological_process	9	1	339	8	9238	0.258594
GO:0050862	positive regulation of T cell receptor signaling pathway	biological_process	10	1	339	8	9238	0.258594
GO:0006301	postreplication repair	biological_process	9	1	339	8	9238	0.258594
GO:0043142	single-stranded DNA-dependent ATPase activity	molecular_function	12	1	339	8	9238	0.258594
GO:0070876	SOSS complex	cellular_component	4	1	339	8	9238	0.258594
GO:0034707	chloride channel complex	cellular_component	7	1	339	8	9238	0.258594
GO:0016493	C-C chemokine receptor activity	molecular_function	9	1	339	8	9238	0.258594
GO:0071467	cellular response to pH	biological_process	6	1	339	8	9238	0.258594
GO:0007019	microtubule depolymerization	biological_process	9	1	339	8	9238	0.258594
GO:0016126	sterol biosynthetic process	biological_process	8	1	339	8	9238	0.258594
GO:0006999	nuclear pore organization	biological_process	7	1	339	8	9238	0.258594
GO:0009048	dosage compensation by inactivation of X chromosome	biological_process	10	1	339	8	9238	0.258594
GO:0036010	protein localization to endosome	biological_process	8	1	339	8	9238	0.258594
GO:0002237	response to molecule of bacterial origin	biological_process	6	1	339	8	9238	0.258594
GO:0035066	positive regulation of histone acetylation	biological_process	11	1	339	8	9238	0.258594
GO:0042276	error-prone translesion synthesis	biological_process	11	1	339	8	9238	0.258594
GO:0042989	sequestering of actin monomers	biological_process	10	1	339	8	9238	0.258594
GO:0005138	interleukin-6 receptor binding	molecular_function	7	1	339	8	9238	0.258594
GO:0045277	respiratory chain complex IV	cellular_component	5	1	339	8	9238	0.258594
GO:0043030	regulation of macrophage activation	biological_process	7	1	339	8	9238	0.258594
GO:0006415	translational termination	biological_process	8	1	339	8	9238	0.258594
GO:0045741	positive regulation of epidermal growth factor-activated receptor activity	biological_process	10	1	339	8	9238	0.258594
GO:0008191	metalloendopeptidase inhibitor activity	molecular_function	8	1	339	8	9238	0.258594
GO:0030027	lamellipodium	cellular_component	6	6	339	117	9238	0.259215
GO:0008543	fibroblast growth factor receptor signaling pathway	biological_process	8	2	339	27	9238	0.260724
GO:0021987	cerebral cortex development	biological_process	5	2	339	27	9238	0.260724
GO:0097190	apoptotic signaling pathway	biological_process	5	2	339	27	9238	0.260724
GO:0005179	hormone activity	molecular_function	7	3	339	49	9238	0.267646
GO:0031966	mitochondrial membrane	cellular_component	5	3	339	49	9238	0.267646
GO:0097202	activation of cysteine-type endopeptidase activity	biological_process	10	1	339	9	9238	0.285825
GO:0070286	axonemal dynein complex assembly	biological_process	8	1	339	9	9238	0.285825
GO:0030857	negative regulation of epithelial cell differentiation	biological_process	8	1	339	9	9238	0.285825
GO:0072357	PTW/PP1 phosphatase complex	cellular_component	5	1	339	9	9238	0.285825
GO:0090114	COPII-coated vesicle budding	biological_process	9	1	339	9	9238	0.285825
GO:0034983	peptidyl-lysine deacetylation	biological_process	11	1	339	9	9238	0.285825
GO:0048311	mitochondrion distribution	biological_process	7	1	339	9	9238	0.285825
GO:0017069	snRNA binding	molecular_function	7	1	339	9	9238	0.285825
GO:0000138	Golgi trans cisterna	cellular_component	8	1	339	9	9238	0.285825
GO:0002526	acute inflammatory response	biological_process	7	1	339	9	9238	0.285825
GO:0009968	negative regulation of signal transduction	biological_process	8	1	339	9	9238	0.285825
GO:0050921	positive regulation of chemotaxis	biological_process	8	1	339	9	9238	0.285825
GO:0008553	proton-exporting ATPase activity, phosphorylative mechanism	molecular_function	10	1	339	9	9238	0.285825
GO:0006895	Golgi to endosome transport	biological_process	9	1	339	9	9238	0.285825
GO:0051247	positive regulation of protein metabolic process	biological_process	8	1	339	9	9238	0.285825
GO:0005247	voltage-gated chloride channel activity	molecular_function	9	1	339	9	9238	0.285825
GO:0090073	positive regulation of protein homodimerization activity	biological_process	8	1	339	9	9238	0.285825
GO:0070262	peptidyl-serine dephosphorylation	biological_process	10	1	339	9	9238	0.285825
GO:0001946	lymphangiogenesis	biological_process	5	1	339	9	9238	0.285825
GO:0046847	filopodium assembly	biological_process	8	1	339	9	9238	0.285825
GO:0004679	AMP-activated protein kinase activity	molecular_function	9	1	339	9	9238	0.285825
GO:0050718	positive regulation of interleukin-1 beta secretion	biological_process	10	1	339	9	9238	0.285825
GO:0060413	atrial septum morphogenesis	biological_process	6	1	339	9	9238	0.285825
GO:0045471	response to ethanol	biological_process	6	1	339	9	9238	0.285825
GO:0002011	morphogenesis of an epithelial sheet	biological_process	7	1	339	9	9238	0.285825
GO:0042058	regulation of epidermal growth factor receptor signaling pathway	biological_process	9	1	339	9	9238	0.285825
GO:0009312	oligosaccharide biosynthetic process	biological_process	7	1	339	9	9238	0.285825
GO:0009612	response to mechanical stimulus	biological_process	5	1	339	9	9238	0.285825
GO:0061298	retina vasculature development in camera-type eye	biological_process	7	1	339	9	9238	0.285825
GO:0000800	lateral element	cellular_component	7	1	339	9	9238	0.285825
GO:0060997	dendritic spine morphogenesis	biological_process	8	1	339	9	9238	0.285825
GO:0003183	mitral valve morphogenesis	biological_process	7	1	339	9	9238	0.285825
GO:0030031	cell projection assembly	biological_process	6	1	339	9	9238	0.285825
GO:0045717	negative regulation of fatty acid biosynthetic process	biological_process	9	1	339	9	9238	0.285825
GO:0016081	synaptic vesicle docking	biological_process	8	1	339	9	9238	0.285825
GO:0060397	growth hormone receptor signaling pathway via JAK-STAT	biological_process	9	1	339	9	9238	0.285825
GO:1901222	regulation of NIK/NF-kappaB signaling	biological_process	9	1	339	9	9238	0.285825
GO:0050811	GABA receptor binding	molecular_function	6	1	339	9	9238	0.285825
GO:0003323	type B pancreatic cell development	biological_process	9	1	339	9	9238	0.285825
GO:0032570	response to progesterone	biological_process	6	1	339	9	9238	0.285825
GO:0033598	mammary gland epithelial cell proliferation	biological_process	5	1	339	9	9238	0.285825
GO:0045778	positive regulation of ossification	biological_process	7	1	339	9	9238	0.285825
GO:0050860	negative regulation of T cell receptor signaling pathway	biological_process	10	1	339	9	9238	0.285825
GO:0001514	selenocysteine incorporation	biological_process	10	1	339	9	9238	0.285825
GO:0098684	photoreceptor ribbon synapse	cellular_component	5	1	339	9	9238	0.285825
GO:0004439	phosphatidylinositol-4,5-bisphosphate 5-phosphatase activity	molecular_function	10	1	339	9	9238	0.285825
GO:0097153	cysteine-type endopeptidase activity involved in apoptotic process	molecular_function	9	1	339	9	9238	0.285825
GO:0035050	embryonic heart tube development	biological_process	6	1	339	9	9238	0.285825
GO:0002260	lymphocyte homeostasis	biological_process	5	1	339	9	9238	0.285825
GO:0035519	protein K29-linked ubiquitination	biological_process	13	1	339	9	9238	0.285825
GO:1901029	negative regulation of mitochondrial outer membrane permeabilization involved in apoptotic signaling pathway	biological_process	10	1	339	9	9238	0.285825
GO:0032924	activin receptor signaling pathway	biological_process	8	1	339	9	9238	0.285825
GO:0035563	positive regulation of chromatin binding	biological_process	7	1	339	9	9238	0.285825
GO:0046849	bone remodeling	biological_process	5	1	339	9	9238	0.285825
GO:0046784	viral mRNA export from host cell nucleus	biological_process	7	1	339	9	9238	0.285825
GO:0050708	regulation of protein secretion	biological_process	9	1	339	9	9238	0.285825
GO:0007409	axonogenesis	biological_process	9	3	339	51	9238	0.287781
GO:0032436	positive regulation of proteasomal ubiquitin-dependent protein catabolic process	biological_process	12	3	339	51	9238	0.287781
GO:0030374	nuclear receptor transcription coactivator activity	molecular_function	6	3	339	51	9238	0.287781
GO:0001786	phosphatidylserine binding	molecular_function	6	2	339	29	9238	0.288261
GO:0003151	outflow tract morphogenesis	biological_process	5	2	339	29	9238	0.288261
GO:0045739	positive regulation of DNA repair	biological_process	10	2	339	29	9238	0.288261
GO:0070534	protein K63-linked ubiquitination	biological_process	13	2	339	29	9238	0.288261
GO:0045596	negative regulation of cell differentiation	biological_process	7	2	339	29	9238	0.288261
GO:0043536	positive regulation of blood vessel endothelial cell migration	biological_process	11	2	339	29	9238	0.288261
GO:0045214	sarcomere organization	biological_process	9	2	339	29	9238	0.288261
GO:0051015	actin filament binding	molecular_function	7	7	339	147	9238	0.294834
GO:0035335	peptidyl-tyrosine dephosphorylation	biological_process	10	4	339	75	9238	0.296124
GO:0042632	cholesterol homeostasis	biological_process	9	3	339	52	9238	0.297894
GO:0006816	calcium ion transport	biological_process	10	3	339	52	9238	0.297894
GO:0045600	positive regulation of fat cell differentiation	biological_process	8	2	339	30	9238	0.301993
GO:0000993	RNA polymerase II complex binding	molecular_function	7	2	339	30	9238	0.301993
GO:0019902	phosphatase binding	molecular_function	6	2	339	30	9238	0.301993
GO:0007029	endoplasmic reticulum organization	biological_process	6	2	339	30	9238	0.301993
GO:0003007	heart morphogenesis	biological_process	6	2	339	30	9238	0.301993
GO:0001162	RNA polymerase II intronic transcription regulatory region sequence-specific DNA binding	molecular_function	10	1	339	10	9238	0.312058
GO:0031256	leading edge membrane	cellular_component	5	1	339	10	9238	0.312058
GO:0009101	glycoprotein biosynthetic process	biological_process	8	1	339	10	9238	0.312058
GO:0016651	oxidoreductase activity, acting on NAD(P)H	molecular_function	5	1	339	10	9238	0.312058
GO:0031464	Cul4A-RING E3 ubiquitin ligase complex	cellular_component	8	1	339	10	9238	0.312058
GO:0051988	regulation of attachment of spindle microtubules to kinetochore	biological_process	8	1	339	10	9238	0.312058
GO:0051292	nuclear pore complex assembly	biological_process	8	1	339	10	9238	0.312058
GO:0005112	Notch binding	molecular_function	6	1	339	10	9238	0.312058
GO:0036122	BMP binding	molecular_function	6	1	339	10	9238	0.312058
GO:0045646	regulation of erythrocyte differentiation	biological_process	8	1	339	10	9238	0.312058
GO:0007568	aging	biological_process	4	1	339	10	9238	0.312058
GO:0072001	renal system development	biological_process	6	1	339	10	9238	0.312058
GO:0042113	B cell activation	biological_process	7	1	339	10	9238	0.312058
GO:0035094	response to nicotine	biological_process	6	1	339	10	9238	0.312058
GO:0032233	positive regulation of actin filament bundle assembly	biological_process	7	1	339	10	9238	0.312058
GO:0031588	nucleotide-activated protein kinase complex	cellular_component	5	1	339	10	9238	0.312058
GO:0070403	NAD+ binding	molecular_function	6	1	339	10	9238	0.312058
GO:1900273	positive regulation of long-term synaptic potentiation	biological_process	9	1	339	10	9238	0.312058
GO:0010820	positive regulation of T cell chemotaxis	biological_process	10	1	339	10	9238	0.312058
GO:0051168	nuclear export	biological_process	9	1	339	10	9238	0.312058
GO:0010390	histone monoubiquitination	biological_process	13	1	339	10	9238	0.312058
GO:0033235	positive regulation of protein sumoylation	biological_process	11	1	339	10	9238	0.312058
GO:0090303	positive regulation of wound healing	biological_process	9	1	339	10	9238	0.312058
GO:0001895	retina homeostasis	biological_process	8	1	339	10	9238	0.312058
GO:0006616	SRP-dependent cotranslational protein targeting to membrane, translocation	biological_process	12	1	339	10	9238	0.312058
GO:0005536	glucose binding	molecular_function	6	1	339	10	9238	0.312058
GO:0090162	establishment of epithelial cell polarity	biological_process	6	1	339	10	9238	0.312058
GO:0033148	positive regulation of intracellular estrogen receptor signaling pathway	biological_process	10	1	339	10	9238	0.312058
GO:0045948	positive regulation of translational initiation	biological_process	11	1	339	10	9238	0.312058
GO:0050847	progesterone receptor signaling pathway	biological_process	7	1	339	10	9238	0.312058
GO:0000445	THO complex part of transcription export complex	cellular_component	5	1	339	10	9238	0.312058
GO:0051224	negative regulation of protein transport	biological_process	7	1	339	10	9238	0.312058
GO:1990825	sequence-specific mRNA binding	molecular_function	8	1	339	10	9238	0.312058
GO:0003085	negative regulation of systemic arterial blood pressure	biological_process	7	1	339	10	9238	0.312058
GO:0043023	ribosomal large subunit binding	molecular_function	6	1	339	10	9238	0.312058
GO:0004866	endopeptidase inhibitor activity	molecular_function	7	1	339	10	9238	0.312058
GO:0031466	Cul5-RING ubiquitin ligase complex	cellular_component	7	1	339	10	9238	0.312058
GO:0099061	integral component of postsynaptic density membrane	cellular_component	6	1	339	10	9238	0.312058
GO:0000266	mitochondrial fission	biological_process	7	1	339	10	9238	0.312058
GO:0048511	rhythmic process	biological_process	3	1	339	10	9238	0.312058
GO:0005751	mitochondrial respiratory chain complex IV	cellular_component	6	1	339	10	9238	0.312058
GO:0051639	actin filament network formation	biological_process	7	1	339	10	9238	0.312058
GO:0097284	hepatocyte apoptotic process	biological_process	8	1	339	10	9238	0.312058
GO:0032733	positive regulation of interleukin-10 production	biological_process	8	1	339	10	9238	0.312058
GO:0042129	regulation of T cell proliferation	biological_process	10	1	339	10	9238	0.312058
GO:0010385	double-stranded methylated DNA binding	molecular_function	8	1	339	10	9238	0.312058
GO:0035067	negative regulation of histone acetylation	biological_process	11	1	339	10	9238	0.312058
GO:0016010	dystrophin-associated glycoprotein complex	cellular_component	5	1	339	10	9238	0.312058
GO:0030515	snoRNA binding	molecular_function	7	1	339	10	9238	0.312058
GO:0061036	positive regulation of cartilage development	biological_process	7	1	339	10	9238	0.312058
GO:0071222	cellular response to lipopolysaccharide	biological_process	8	4	339	77	9238	0.312803
GO:0016323	basolateral plasma membrane	cellular_component	5	4	339	77	9238	0.312803
GO:0004725	protein tyrosine phosphatase activity	molecular_function	9	4	339	77	9238	0.312803
GO:0010634	positive regulation of epithelial cell migration	biological_process	9	2	339	31	9238	0.315678
GO:0030170	pyridoxal phosphate binding	molecular_function	6	2	339	31	9238	0.315678
GO:0006310	DNA recombination	biological_process	8	2	339	31	9238	0.315678
GO:0006378	mRNA polyadenylation	biological_process	12	2	339	31	9238	0.315678
GO:0032755	positive regulation of interleukin-6 production	biological_process	8	2	339	31	9238	0.315678
GO:0071260	cellular response to mechanical stimulus	biological_process	6	2	339	31	9238	0.315678
GO:0009615	response to virus	biological_process	7	3	339	54	9238	0.318172
GO:0007059	chromosome segregation	biological_process	4	3	339	54	9238	0.318172
GO:0098609	cell-cell adhesion	biological_process	5	3	339	54	9238	0.318172
GO:0000165	MAPK cascade	biological_process	11	4	339	78	9238	0.321175
GO:0042995	cell projection	cellular_component	4	3	339	55	9238	0.328321
GO:0019003	GDP binding	molecular_function	8	3	339	55	9238	0.328321
GO:0005543	phospholipid binding	molecular_function	5	3	339	55	9238	0.328321
GO:0019903	protein phosphatase binding	molecular_function	7	3	339	55	9238	0.328321
GO:0072593	reactive oxygen species metabolic process	biological_process	5	2	339	32	9238	0.329302
GO:0007088	regulation of mitotic nuclear division	biological_process	8	2	339	32	9238	0.329302
GO:0007076	mitotic chromosome condensation	biological_process	10	1	339	11	9238	0.33733
GO:0005960	glycine cleavage complex	cellular_component	6	1	339	11	9238	0.33733
GO:1904754	positive regulation of vascular associated smooth muscle cell migration	biological_process	10	1	339	11	9238	0.33733
GO:0001817	regulation of cytokine production	biological_process	6	1	339	11	9238	0.33733
GO:0007220	Notch receptor processing	biological_process	8	1	339	11	9238	0.33733
GO:0002224	toll-like receptor signaling pathway	biological_process	8	1	339	11	9238	0.33733
GO:0140268	endoplasmic reticulum-plasma membrane contact site	cellular_component	5	1	339	11	9238	0.33733
GO:0051549	positive regulation of keratinocyte migration	biological_process	10	1	339	11	9238	0.33733
GO:0032793	positive regulation of CREB transcription factor activity	biological_process	7	1	339	11	9238	0.33733
GO:0031430	M band	cellular_component	5	1	339	11	9238	0.33733
GO:0031301	integral component of organelle membrane	cellular_component	6	1	339	11	9238	0.33733
GO:1900029	positive regulation of ruffle assembly	biological_process	10	1	339	11	9238	0.33733
GO:0031005	filamin binding	molecular_function	6	1	339	11	9238	0.33733
GO:0019953	sexual reproduction	biological_process	4	1	339	11	9238	0.33733
GO:0008610	lipid biosynthetic process	biological_process	6	1	339	11	9238	0.33733
GO:2000774	positive regulation of cellular senescence	biological_process	7	1	339	11	9238	0.33733
GO:0048024	regulation of mRNA splicing, via spliceosome	biological_process	9	1	339	11	9238	0.33733
GO:0050807	regulation of synapse organization	biological_process	7	1	339	11	9238	0.33733
GO:0048709	oligodendrocyte differentiation	biological_process	7	1	339	11	9238	0.33733
GO:0046716	muscle cell cellular homeostasis	biological_process	5	1	339	11	9238	0.33733
GO:0045647	negative regulation of erythrocyte differentiation	biological_process	9	1	339	11	9238	0.33733
GO:0007339	binding of sperm to zona pellucida	biological_process	7	1	339	11	9238	0.33733
GO:0035721	intraciliary retrograde transport	biological_process	8	1	339	11	9238	0.33733
GO:0032148	activation of protein kinase B activity	biological_process	13	1	339	11	9238	0.33733
GO:0050995	negative regulation of lipid catabolic process	biological_process	8	1	339	11	9238	0.33733
GO:0042554	superoxide anion generation	biological_process	7	1	339	11	9238	0.33733
GO:0061608	nuclear import signal receptor activity	molecular_function	5	1	339	11	9238	0.33733
GO:0001931	uropod	cellular_component	6	1	339	11	9238	0.33733
GO:0030166	proteoglycan biosynthetic process	biological_process	9	1	339	11	9238	0.33733
GO:0016043	cellular component organization	biological_process	4	1	339	11	9238	0.33733
GO:0099072	regulation of postsynaptic membrane neurotransmitter receptor levels	biological_process	5	1	339	11	9238	0.33733
GO:0010667	negative regulation of cardiac muscle cell apoptotic process	biological_process	12	1	339	11	9238	0.33733
GO:0051044	positive regulation of membrane protein ectodomain proteolysis	biological_process	9	1	339	11	9238	0.33733
GO:0034332	adherens junction organization	biological_process	6	1	339	11	9238	0.33733
GO:0007405	neuroblast proliferation	biological_process	5	1	339	11	9238	0.33733
GO:0090026	positive regulation of monocyte chemotaxis	biological_process	9	1	339	11	9238	0.33733
GO:0060285	cilium-dependent cell motility	biological_process	7	1	339	11	9238	0.33733
GO:1903830	magnesium ion transmembrane transport	biological_process	11	1	339	11	9238	0.33733
GO:0009314	response to radiation	biological_process	5	1	339	11	9238	0.33733
GO:0001782	B cell homeostasis	biological_process	6	1	339	11	9238	0.33733
GO:0007422	peripheral nervous system development	biological_process	6	1	339	11	9238	0.33733
GO:0001964	startle response	biological_process	5	1	339	11	9238	0.33733
GO:0030278	regulation of ossification	biological_process	6	1	339	11	9238	0.33733
GO:0031110	regulation of microtubule polymerization or depolymerization	biological_process	8	1	339	11	9238	0.33733
GO:0001893	maternal placenta development	biological_process	5	1	339	11	9238	0.33733
GO:0032722	positive regulation of chemokine production	biological_process	8	1	339	11	9238	0.33733
GO:0030660	Golgi-associated vesicle membrane	cellular_component	7	1	339	11	9238	0.33733
GO:0009888	tissue development	biological_process	5	1	339	11	9238	0.33733
GO:0003916	DNA topoisomerase activity	molecular_function	5	1	339	11	9238	0.33733
GO:0030509	BMP signaling pathway	biological_process	10	3	339	56	9238	0.338469
GO:0030334	regulation of cell migration	biological_process	7	3	339	56	9238	0.338469
GO:0070098	chemokine-mediated signaling pathway	biological_process	7	2	339	33	9238	0.342851
GO:0002181	cytoplasmic translation	biological_process	9	2	339	33	9238	0.342851
GO:1903078	positive regulation of protein localization to plasma membrane	biological_process	10	2	339	33	9238	0.342851
GO:0030879	mammary gland development	biological_process	7	2	339	33	9238	0.342851
GO:0032868	response to insulin	biological_process	7	2	339	33	9238	0.342851
GO:0090307	mitotic spindle assembly	biological_process	10	2	339	33	9238	0.342851
GO:0008104	protein localization	biological_process	5	3	339	57	9238	0.348607
GO:0032496	response to lipopolysaccharide	biological_process	7	3	339	57	9238	0.348607
GO:0008138	protein tyrosine/serine/threonine phosphatase activity	molecular_function	9	2	339	34	9238	0.356312
GO:0007613	memory	biological_process	5	2	339	34	9238	0.356312
GO:0030317	flagellated sperm motility	biological_process	5	2	339	34	9238	0.356312
GO:0090630	activation of GTPase activity	biological_process	9	3	339	58	9238	0.358729
GO:0098794	postsynapse	cellular_component	4	3	339	58	9238	0.358729
GO:0000784	nuclear chromosome, telomeric region	cellular_component	8	3	339	58	9238	0.358729
GO:1990138	neuron projection extension	biological_process	6	1	339	12	9238	0.361677
GO:0001825	blastocyst formation	biological_process	5	1	339	12	9238	0.361677
GO:0060088	auditory receptor cell stereocilium organization	biological_process	9	1	339	12	9238	0.361677
GO:0000146	microfilament motor activity	molecular_function	10	1	339	12	9238	0.361677
GO:0035591	signaling adaptor activity	molecular_function	6	1	339	12	9238	0.361677
GO:0002089	lens morphogenesis in camera-type eye	biological_process	5	1	339	12	9238	0.361677
GO:0006369	termination of RNA polymerase II transcription	biological_process	9	1	339	12	9238	0.361677
GO:0070885	negative regulation of calcineurin-NFAT signaling cascade	biological_process	12	1	339	12	9238	0.361677
GO:0048339	paraxial mesoderm development	biological_process	7	1	339	12	9238	0.361677
GO:0051493	regulation of cytoskeleton organization	biological_process	8	1	339	12	9238	0.361677
GO:0030539	male genitalia development	biological_process	7	1	339	12	9238	0.361677
GO:0060020	Bergmann glial cell differentiation	biological_process	8	1	339	12	9238	0.361677
GO:0090543	Flemming body	cellular_component	4	1	339	12	9238	0.361677
GO:0001678	cellular glucose homeostasis	biological_process	9	1	339	12	9238	0.361677
GO:0003674	molecular_function	molecular_function	2	1	339	12	9238	0.361677
GO:0071786	endoplasmic reticulum tubular network organization	biological_process	7	1	339	12	9238	0.361677
GO:0051604	protein maturation	biological_process	7	1	339	12	9238	0.361677
GO:0045475	locomotor rhythm	biological_process	5	1	339	12	9238	0.361677
GO:0046622	positive regulation of organ growth	biological_process	8	1	339	12	9238	0.361677
GO:0001935	endothelial cell proliferation	biological_process	5	1	339	12	9238	0.361677
GO:0045725	positive regulation of glycogen biosynthetic process	biological_process	11	1	339	12	9238	0.361677
GO:0048872	homeostasis of number of cells	biological_process	6	1	339	12	9238	0.361677
GO:0090190	positive regulation of branching involved in ureteric bud morphogenesis	biological_process	10	1	339	12	9238	0.361677
GO:0001819	positive regulation of cytokine production	biological_process	7	1	339	12	9238	0.361677
GO:0000463	maturation of LSU-rRNA from tricistronic rRNA transcript (SSU-rRNA, 5.8S rRNA, LSU-rRNA	biological_process	13	1	339	12	9238	0.361677
GO:0035970	peptidyl-threonine dephosphorylation	biological_process	10	1	339	12	9238	0.361677
GO:0007569	cell aging	biological_process	5	1	339	12	9238	0.361677
GO:0042645	mitochondrial nucleoid	cellular_component	4	2	339	35	9238	0.369673
GO:0010811	positive regulation of cell-substrate adhesion	biological_process	7	2	339	35	9238	0.369673
GO:0006821	chloride transport	biological_process	9	2	339	35	9238	0.369673
GO:1904115	axon cytoplasm	cellular_component	6	2	339	35	9238	0.369673
GO:0016791	phosphatase activity	molecular_function	7	5	339	109	9238	0.371073
GO:0006954	inflammatory response	biological_process	6	5	339	109	9238	0.371073
GO:0016746	transferase activity, transferring acyl groups	molecular_function	5	3	339	60	9238	0.378901
GO:0050852	T cell receptor signaling pathway	biological_process	8	3	339	60	9238	0.378901
GO:0019843	rRNA binding	molecular_function	7	2	339	36	9238	0.382923
GO:0034198	cellular response to amino acid starvation	biological_process	9	2	339	36	9238	0.382923
GO:0030426	growth cone	cellular_component	5	2	339	36	9238	0.382923
GO:0055038	recycling endosome membrane	cellular_component	9	2	339	36	9238	0.382923
GO:0032456	endocytic recycling	biological_process	8	2	339	36	9238	0.382923
GO:0031410	cytoplasmic vesicle	cellular_component	6	7	339	162	9238	0.384507
GO:0070628	proteasome binding	molecular_function	5	1	339	13	9238	0.385131
GO:0030048	actin filament-based movement	biological_process	5	1	339	13	9238	0.385131
GO:0034314	Arp2/3 complex-mediated actin nucleation	biological_process	8	1	339	13	9238	0.385131
GO:0005847	mRNA cleavage and polyadenylation specificity factor complex	cellular_component	5	1	339	13	9238	0.385131
GO:0097193	intrinsic apoptotic signaling pathway	biological_process	6	1	339	13	9238	0.385131
GO:0038191	neuropilin binding	molecular_function	6	1	339	13	9238	0.385131
GO:0070531	BRCA1-A complex	cellular_component	4	1	339	13	9238	0.385131
GO:0051019	mitogen-activated protein kinase binding	molecular_function	8	1	339	13	9238	0.385131
GO:0030215	semaphorin receptor binding	molecular_function	6	1	339	13	9238	0.385131
GO:0045859	regulation of protein kinase activity	biological_process	10	1	339	13	9238	0.385131
GO:0006783	heme biosynthetic process	biological_process	9	1	339	13	9238	0.385131
GO:0008150	biological_process	biological_process	2	1	339	13	9238	0.385131
GO:0032963	collagen metabolic process	biological_process	4	1	339	13	9238	0.385131
GO:0048663	neuron fate commitment	biological_process	6	1	339	13	9238	0.385131
GO:0090110	COPII-coated vesicle cargo loading	biological_process	7	1	339	13	9238	0.385131
GO:0048678	response to axon injury	biological_process	6	1	339	13	9238	0.385131
GO:0050870	positive regulation of T cell activation	biological_process	9	1	339	13	9238	0.385131
GO:0031267	small GTPase binding	molecular_function	7	1	339	13	9238	0.385131
GO:0043539	protein serine/threonine kinase activator activity	molecular_function	8	1	339	13	9238	0.385131
GO:0000346	transcription export complex	cellular_component	4	1	339	13	9238	0.385131
GO:0051537	2 iron, 2 sulfur cluster binding	molecular_function	6	1	339	13	9238	0.385131
GO:0007157	heterophilic cell-cell adhesion via plasma membrane cell adhesion molecules	biological_process	7	1	339	13	9238	0.385131
GO:0051571	positive regulation of histone H3-K4 methylation	biological_process	12	1	339	13	9238	0.385131
GO:0070064	proline-rich region binding	molecular_function	5	1	339	13	9238	0.385131
GO:0035925	mRNA 3'-UTR AU-rich region binding	molecular_function	9	1	339	13	9238	0.385131
GO:0006476	protein deacetylation	biological_process	10	1	339	13	9238	0.385131
GO:1904355	positive regulation of telomere capping	biological_process	11	1	339	13	9238	0.385131
GO:0030042	actin filament depolymerization	biological_process	8	1	339	13	9238	0.385131
GO:0005086	ARF guanyl-nucleotide exchange factor activity	molecular_function	8	1	339	13	9238	0.385131
GO:0071897	DNA biosynthetic process	biological_process	8	1	339	13	9238	0.385131
GO:0007517	muscle organ development	biological_process	6	1	339	13	9238	0.385131
GO:0047496	vesicle transport along microtubule	biological_process	10	1	339	13	9238	0.385131
GO:0042800	histone methyltransferase activity (H3-K4 specific	molecular_function	10	1	339	13	9238	0.385131
GO:0008528	G protein-coupled peptide receptor activity	molecular_function	6	1	339	13	9238	0.385131
GO:0032012	regulation of ARF protein signal transduction	biological_process	11	1	339	13	9238	0.385131
GO:0006636	unsaturated fatty acid biosynthetic process	biological_process	11	1	339	13	9238	0.385131
GO:2000737	negative regulation of stem cell differentiation	biological_process	8	1	339	13	9238	0.385131
GO:0044798	nuclear transcription factor complex	cellular_component	5	1	339	13	9238	0.385131
GO:2000009	negative regulation of protein localization to cell surface	biological_process	7	1	339	13	9238	0.385131
GO:0007269	neurotransmitter secretion	biological_process	6	1	339	13	9238	0.385131
GO:0051156	glucose 6-phosphate metabolic process	biological_process	7	1	339	13	9238	0.385131
GO:0003954	NADH dehydrogenase activity	molecular_function	6	1	339	13	9238	0.385131
GO:0017166	vinculin binding	molecular_function	6	1	339	13	9238	0.385131
GO:0097345	mitochondrial outer membrane permeabilization	biological_process	10	1	339	13	9238	0.385131
GO:0000175	3'-5'-exoribonuclease activity	molecular_function	9	1	339	13	9238	0.385131
GO:0007520	myoblast fusion	biological_process	6	1	339	13	9238	0.385131
GO:0003382	epithelial cell morphogenesis	biological_process	8	1	339	13	9238	0.385131
GO:0004721	phosphoprotein phosphatase activity	molecular_function	8	4	339	86	9238	0.388403
GO:0090090	negative regulation of canonical Wnt signaling pathway	biological_process	10	4	339	86	9238	0.388403
GO:0008203	cholesterol metabolic process	biological_process	8	2	339	37	9238	0.396053
GO:0021766	hippocampus development	biological_process	5	2	339	37	9238	0.396053
GO:0032880	regulation of protein localization	biological_process	6	2	339	37	9238	0.396053
GO:1902476	chloride transmembrane transport	biological_process	10	2	339	37	9238	0.396053
GO:0000976	transcription regulatory region sequence-specific DNA binding	molecular_function	8	3	339	62	9238	0.398936
GO:0016601	Rac protein signal transduction	biological_process	8	1	339	14	9238	0.407726
GO:0048844	artery morphogenesis	biological_process	7	1	339	14	9238	0.407726
GO:0043627	response to estrogen	biological_process	4	1	339	14	9238	0.407726
GO:0097194	execution phase of apoptosis	biological_process	4	1	339	14	9238	0.407726
GO:0033147	negative regulation of intracellular estrogen receptor signaling pathway	biological_process	10	1	339	14	9238	0.407726
GO:0031526	brush border membrane	cellular_component	6	1	339	14	9238	0.407726
GO:0032874	positive regulation of stress-activated MAPK cascade	biological_process	12	1	339	14	9238	0.407726
GO:2000778	positive regulation of interleukin-6 secretion	biological_process	9	1	339	14	9238	0.407726
GO:0050661	NADP binding	molecular_function	6	1	339	14	9238	0.407726
GO:0006607	NLS-bearing protein import into nucleus	biological_process	12	1	339	14	9238	0.407726
GO:0001916	positive regulation of T cell mediated cytotoxicity	biological_process	8	1	339	14	9238	0.407726
GO:0004675	transmembrane receptor protein serine/threonine kinase activity	molecular_function	9	1	339	14	9238	0.407726
GO:0001158	enhancer sequence-specific DNA binding	molecular_function	9	1	339	14	9238	0.407726
GO:1903827	regulation of cellular protein localization	biological_process	7	1	339	14	9238	0.407726
GO:0032426	stereocilium tip	cellular_component	4	1	339	14	9238	0.407726
GO:0030220	platelet formation	biological_process	7	1	339	14	9238	0.407726
GO:0070371	ERK1 and ERK2 cascade	biological_process	12	1	339	14	9238	0.407726
GO:0046677	response to antibiotic	biological_process	5	1	339	14	9238	0.407726
GO:0005104	fibroblast growth factor receptor binding	molecular_function	7	1	339	14	9238	0.407726
GO:0048167	regulation of synaptic plasticity	biological_process	9	1	339	14	9238	0.407726
GO:0072425	signal transduction involved in G2 DNA damage checkpoint	biological_process	9	1	339	14	9238	0.407726
GO:0035197	siRNA binding	molecular_function	8	1	339	14	9238	0.407726
GO:0004198	calcium-dependent cysteine-type endopeptidase activity	molecular_function	9	1	339	14	9238	0.407726
GO:0043236	laminin binding	molecular_function	5	1	339	14	9238	0.407726
GO:0045930	negative regulation of mitotic cell cycle	biological_process	8	1	339	14	9238	0.407726
GO:0010458	exit from mitosis	biological_process	7	1	339	14	9238	0.407726
GO:0006376	mRNA splice site selection	biological_process	9	1	339	14	9238	0.407726
GO:0033137	negative regulation of peptidyl-serine phosphorylation	biological_process	11	1	339	14	9238	0.407726
GO:0004467	long-chain fatty acid-CoA ligase activity	molecular_function	8	1	339	14	9238	0.407726
GO:0005088	Ras guanyl-nucleotide exchange factor activity	molecular_function	8	1	339	14	9238	0.407726
GO:1900745	positive regulation of p38MAPK cascade	biological_process	13	1	339	14	9238	0.407726
GO:0008097	5S rRNA binding	molecular_function	8	1	339	14	9238	0.407726
GO:0030122	AP-2 adaptor complex	cellular_component	8	1	339	14	9238	0.407726
GO:0006695	cholesterol biosynthetic process	biological_process	9	1	339	14	9238	0.407726
GO:0090200	positive regulation of release of cytochrome c from mitochondria	biological_process	10	1	339	14	9238	0.407726
GO:0051721	protein phosphatase 2A binding	molecular_function	8	1	339	14	9238	0.407726
GO:0050909	sensory perception of taste	biological_process	8	1	339	14	9238	0.407726
GO:0016773	phosphotransferase activity, alcohol group as acceptor	molecular_function	6	1	339	14	9238	0.407726
GO:0030742	GTP-dependent protein binding	molecular_function	5	1	339	14	9238	0.407726
GO:0097178	ruffle assembly	biological_process	8	1	339	14	9238	0.407726
GO:0061014	positive regulation of mRNA catabolic process	biological_process	9	1	339	14	9238	0.407726
GO:0006979	response to oxidative stress	biological_process	5	3	339	63	9238	0.408889
GO:0015914	phospholipid transport	biological_process	8	2	339	38	9238	0.409053
GO:0030512	negative regulation of transforming growth factor beta receptor signaling pathway	biological_process	10	2	339	38	9238	0.409053
GO:0051897	positive regulation of protein kinase B signaling	biological_process	10	3	339	64	9238	0.418792
GO:0070588	calcium ion transmembrane transport	biological_process	11	3	339	64	9238	0.418792
GO:0030308	negative regulation of cell growth	biological_process	7	3	339	64	9238	0.418792
GO:0045666	positive regulation of neuron differentiation	biological_process	10	2	339	39	9238	0.421915
GO:0005643	nuclear pore	cellular_component	4	2	339	39	9238	0.421915
GO:0060548	negative regulation of cell death	biological_process	7	2	339	39	9238	0.421915
GO:0010212	response to ionizing radiation	biological_process	6	2	339	39	9238	0.421915
GO:0009636	response to toxic substance	biological_process	5	2	339	39	9238	0.421915
GO:0050896	response to stimulus	biological_process	3	7	339	169	9238	0.42689
GO:0006470	protein dephosphorylation	biological_process	9	6	339	143	9238	0.428478
GO:0001726	ruffle	cellular_component	6	3	339	65	9238	0.428639
GO:0006265	DNA topological change	biological_process	8	1	339	15	9238	0.429494
GO:0042277	peptide binding	molecular_function	5	1	339	15	9238	0.429494
GO:0030500	regulation of bone mineralization	biological_process	7	1	339	15	9238	0.429494
GO:0030127	COPII vesicle coat	cellular_component	8	1	339	15	9238	0.429494
GO:0003887	DNA-directed DNA polymerase activity	molecular_function	8	1	339	15	9238	0.429494
GO:0051894	positive regulation of focal adhesion assembly	biological_process	9	1	339	15	9238	0.429494
GO:0045055	regulated exocytosis	biological_process	8	1	339	15	9238	0.429494
GO:0016409	palmitoyltransferase activity	molecular_function	7	1	339	15	9238	0.429494
GO:0044291	cell-cell contact zone	cellular_component	5	1	339	15	9238	0.429494
GO:0006672	ceramide metabolic process	biological_process	9	1	339	15	9238	0.429494
GO:0006541	glutamine metabolic process	biological_process	11	1	339	15	9238	0.429494
GO:0048268	clathrin coat assembly	biological_process	8	1	339	15	9238	0.429494
GO:0048020	CCR chemokine receptor binding	molecular_function	8	1	339	15	9238	0.429494
GO:0016226	iron-sulfur cluster assembly	biological_process	6	1	339	15	9238	0.429494
GO:0035255	ionotropic glutamate receptor binding	molecular_function	7	1	339	15	9238	0.429494
GO:0007064	mitotic sister chromatid cohesion	biological_process	6	1	339	15	9238	0.429494
GO:0007131	reciprocal meiotic recombination	biological_process	10	1	339	15	9238	0.429494
GO:0071425	hematopoietic stem cell proliferation	biological_process	5	1	339	15	9238	0.429494
GO:0045595	regulation of cell differentiation	biological_process	6	1	339	15	9238	0.429494
GO:0000028	ribosomal small subunit assembly	biological_process	9	1	339	15	9238	0.429494
GO:0060425	lung morphogenesis	biological_process	6	1	339	15	9238	0.429494
GO:0048843	negative regulation of axon extension involved in axon guidance	biological_process	9	1	339	15	9238	0.429494
GO:0090023	positive regulation of neutrophil chemotaxis	biological_process	10	1	339	15	9238	0.429494
GO:0061351	neural precursor cell proliferation	biological_process	4	1	339	15	9238	0.429494
GO:0051393	alpha-actinin binding	molecular_function	7	1	339	15	9238	0.429494
GO:0031418	L-ascorbic acid binding	molecular_function	6	1	339	15	9238	0.429494
GO:0005024	transforming growth factor beta-activated receptor activity	molecular_function	10	1	339	15	9238	0.429494
GO:0004012	phospholipid-translocating ATPase activity	molecular_function	6	1	339	15	9238	0.429494
GO:0042623	ATPase activity, coupled	molecular_function	10	1	339	15	9238	0.429494
GO:0080182	histone H3-K4 trimethylation	biological_process	13	1	339	15	9238	0.429494
GO:0098978	glutamatergic synapse	cellular_component	4	7	339	170	9238	0.432928
GO:0001570	vasculogenesis	biological_process	6	2	339	40	9238	0.434632
GO:0030139	endocytic vesicle	cellular_component	7	2	339	40	9238	0.434632
GO:0007155	cell adhesion	biological_process	4	7	339	171	9238	0.438958
GO:0051289	protein homotetramerization	biological_process	9	2	339	41	9238	0.447198
GO:0060348	bone development	biological_process	6	2	339	41	9238	0.447198
GO:0004867	serine-type endopeptidase inhibitor activity	molecular_function	8	2	339	41	9238	0.447198
GO:0005739	mitochondrion	cellular_component	6	32	339	844	9238	0.450071
GO:0046329	negative regulation of JNK cascade	biological_process	13	1	339	16	9238	0.450463
GO:0002218	activation of innate immune response	biological_process	5	1	339	16	9238	0.450463
GO:0004708	MAP kinase kinase activity	molecular_function	9	1	339	16	9238	0.450463
GO:0043044	ATP-dependent chromatin remodeling	biological_process	7	1	339	16	9238	0.450463
GO:0048188	Set1C/COMPASS complex	cellular_component	7	1	339	16	9238	0.450463
GO:0001894	tissue homeostasis	biological_process	7	1	339	16	9238	0.450463
GO:0045995	regulation of embryonic development	biological_process	7	1	339	16	9238	0.450463
GO:0043169	cation binding	molecular_function	5	1	339	16	9238	0.450463
GO:0044853	plasma membrane raft	cellular_component	7	1	339	16	9238	0.450463
GO:0007178	transmembrane receptor protein serine/threonine kinase signaling pathway	biological_process	7	1	339	16	9238	0.450463
GO:0001541	ovarian follicle development	biological_process	6	1	339	16	9238	0.450463
GO:0060122	inner ear receptor cell stereocilium organization	biological_process	8	1	339	16	9238	0.450463
GO:0002063	chondrocyte development	biological_process	6	1	339	16	9238	0.450463
GO:0001974	blood vessel remodeling	biological_process	5	1	339	16	9238	0.450463
GO:0007254	JNK cascade	biological_process	13	1	339	16	9238	0.450463
GO:0070498	interleukin-1-mediated signaling pathway	biological_process	7	1	339	16	9238	0.450463
GO:0048565	digestive tract development	biological_process	6	1	339	16	9238	0.450463
GO:0036120	cellular response to platelet-derived growth factor stimulus	biological_process	6	1	339	16	9238	0.450463
GO:0035329	hippo signaling	biological_process	6	1	339	16	9238	0.450463
GO:2000378	negative regulation of reactive oxygen species metabolic process	biological_process	8	1	339	16	9238	0.450463
GO:2001240	negative regulation of extrinsic apoptotic signaling pathway in absence of ligand	biological_process	10	1	339	16	9238	0.450463
GO:0002039	p53 binding	molecular_function	5	2	339	42	9238	0.459606
GO:0005546	phosphatidylinositol-4,5-bisphosphate binding	molecular_function	9	2	339	42	9238	0.459606
GO:0030154	cell differentiation	biological_process	5	6	339	148	9238	0.461169
GO:0000209	protein polyubiquitination	biological_process	12	4	339	95	9238	0.462846
GO:0007492	endoderm development	biological_process	6	1	339	17	9238	0.470664
GO:0051491	positive regulation of filopodium assembly	biological_process	11	1	339	17	9238	0.470664
GO:0030301	cholesterol transport	biological_process	9	1	339	17	9238	0.470664
GO:0001676	long-chain fatty acid metabolic process	biological_process	10	1	339	17	9238	0.470664
GO:0009409	response to cold	biological_process	5	1	339	17	9238	0.470664
GO:0015035	protein disulfide oxidoreductase activity	molecular_function	7	1	339	17	9238	0.470664
GO:0010800	positive regulation of peptidyl-threonine phosphorylation	biological_process	11	1	339	17	9238	0.470664
GO:0055088	lipid homeostasis	biological_process	7	1	339	17	9238	0.470664
GO:0030890	positive regulation of B cell proliferation	biological_process	11	1	339	17	9238	0.470664
GO:0090102	cochlea development	biological_process	5	1	339	17	9238	0.470664
GO:0050767	regulation of neurogenesis	biological_process	8	1	339	17	9238	0.470664
GO:0008544	epidermis development	biological_process	6	1	339	17	9238	0.470664
GO:0006349	regulation of gene expression by genetic imprinting	biological_process	9	1	339	17	9238	0.470664
GO:0032715	negative regulation of interleukin-6 production	biological_process	8	1	339	17	9238	0.470664
GO:0022604	regulation of cell morphogenesis	biological_process	7	1	339	17	9238	0.470664
GO:0016747	transferase activity, transferring acyl groups other than amino-acyl groups	molecular_function	6	1	339	17	9238	0.470664
GO:0008139	nuclear localization sequence binding	molecular_function	7	1	339	17	9238	0.470664
GO:0060045	positive regulation of cardiac muscle cell proliferation	biological_process	8	1	339	17	9238	0.470664
GO:2000114	regulation of establishment of cell polarity	biological_process	7	1	339	17	9238	0.470664
GO:0070584	mitochondrion morphogenesis	biological_process	7	1	339	17	9238	0.470664
GO:0032418	lysosome localization	biological_process	6	1	339	17	9238	0.470664
GO:0030992	intraciliary transport particle B	cellular_component	4	1	339	17	9238	0.470664
GO:0051568	histone H3-K4 methylation	biological_process	13	1	339	17	9238	0.470664
GO:0060324	face development	biological_process	5	1	339	17	9238	0.470664
GO:0042273	ribosomal large subunit biogenesis	biological_process	6	1	339	17	9238	0.470664
GO:0007097	nuclear migration	biological_process	7	1	339	17	9238	0.470664
GO:0070300	phosphatidic acid binding	molecular_function	6	1	339	17	9238	0.470664
GO:0071526	semaphorin-plexin signaling pathway	biological_process	6	1	339	17	9238	0.470664
GO:0043022	ribosome binding	molecular_function	6	2	339	43	9238	0.47185
GO:0006879	cellular iron ion homeostasis	biological_process	12	2	339	43	9238	0.47185
GO:0090502	RNA phosphodiester bond hydrolysis, endonucleolytic	biological_process	10	2	339	43	9238	0.47185
GO:0005509	calcium ion binding	molecular_function	7	16	339	421	9238	0.479658
GO:0006974	cellular response to DNA damage stimulus	biological_process	6	8	339	205	9238	0.480927
GO:0006935	chemotaxis	biological_process	5	2	339	44	9238	0.483927
GO:0009267	cellular response to starvation	biological_process	8	2	339	44	9238	0.483927
GO:0010976	positive regulation of neuron projection development	biological_process	11	2	339	44	9238	0.483927
GO:0003682	chromatin binding	molecular_function	4	12	339	314	9238	0.485029
GO:0050821	protein stabilization	biological_process	6	5	339	125	9238	0.487109
GO:0002548	monocyte chemotaxis	biological_process	6	1	339	18	9238	0.490125
GO:0098556	cytoplasmic side of rough endoplasmic reticulum membrane	cellular_component	8	1	339	18	9238	0.490125
GO:0051787	misfolded protein binding	molecular_function	5	1	339	18	9238	0.490125
GO:0018345	protein palmitoylation	biological_process	10	1	339	18	9238	0.490125
GO:0017056	structural constituent of nuclear pore	molecular_function	4	1	339	18	9238	0.490125
GO:0001816	cytokine production	biological_process	4	1	339	18	9238	0.490125
GO:0007369	gastrulation	biological_process	6	1	339	18	9238	0.490125
GO:0005254	chloride channel activity	molecular_function	8	1	339	18	9238	0.490125
GO:0007566	embryo implantation	biological_process	4	1	339	18	9238	0.490125
GO:0042130	negative regulation of T cell proliferation	biological_process	11	1	339	18	9238	0.490125
GO:0008137	NADH dehydrogenase (ubiquinone) activity	molecular_function	8	1	339	18	9238	0.490125
GO:0031674	I band	cellular_component	5	1	339	18	9238	0.490125
GO:0043122	regulation of I-kappaB kinase/NF-kappaB signaling	biological_process	9	1	339	18	9238	0.490125
GO:0060716	labyrinthine layer blood vessel development	biological_process	7	1	339	18	9238	0.490125
GO:0044548	S100 protein binding	molecular_function	5	1	339	18	9238	0.490125
GO:0034394	protein localization to cell surface	biological_process	7	1	339	18	9238	0.490125
GO:0097192	extrinsic apoptotic signaling pathway in absence of ligand	biological_process	6	1	339	18	9238	0.490125
GO:0046513	ceramide biosynthetic process	biological_process	10	1	339	18	9238	0.490125
GO:0043388	positive regulation of DNA binding	biological_process	7	1	339	18	9238	0.490125
GO:0006487	protein N-linked glycosylation	biological_process	10	1	339	18	9238	0.490125
GO:0090316	positive regulation of intracellular protein transport	biological_process	9	1	339	18	9238	0.490125
GO:0033169	histone H3-K9 demethylation	biological_process	13	1	339	18	9238	0.490125
GO:0071333	cellular response to glucose stimulus	biological_process	10	1	339	18	9238	0.490125
GO:0046835	carbohydrate phosphorylation	biological_process	8	1	339	18	9238	0.490125
GO:0007010	cytoskeleton organization	biological_process	6	3	339	72	9238	0.495679
GO:0032922	circadian regulation of gene expression	biological_process	5	2	339	45	9238	0.495831
GO:0031072	heat shock protein binding	molecular_function	5	2	339	45	9238	0.495831
GO:0006413	translational initiation	biological_process	5	2	339	45	9238	0.495831
GO:0070936	protein K48-linked ubiquitination	biological_process	13	2	339	45	9238	0.495831
GO:0031252	cell leading edge	cellular_component	4	2	339	45	9238	0.495831
GO:0002376	immune system process	biological_process	3	2	339	45	9238	0.495831
GO:0015631	tubulin binding	molecular_function	6	2	339	45	9238	0.495831
GO:0006468	protein phosphorylation	biological_process	9	19	339	509	9238	0.503873
GO:0000381	regulation of alternative mRNA splicing, via spliceosome	biological_process	10	2	339	46	9238	0.50756
GO:0032088	negative regulation of NF-kappaB transcription factor activity	biological_process	7	2	339	46	9238	0.50756
GO:0023014	signal transduction by protein phosphorylation	biological_process	10	2	339	46	9238	0.50756
GO:0050728	negative regulation of inflammatory response	biological_process	9	2	339	46	9238	0.50756
GO:0051259	protein complex oligomerization	biological_process	7	2	339	46	9238	0.50756
GO:0070971	endoplasmic reticulum exit site	cellular_component	7	1	339	19	9238	0.508872
GO:0009408	response to heat	biological_process	5	1	339	19	9238	0.508872
GO:0014032	neural crest cell development	biological_process	7	1	339	19	9238	0.508872
GO:0030017	sarcomere	cellular_component	5	1	339	19	9238	0.508872
GO:0034620	cellular response to unfolded protein	biological_process	7	1	339	19	9238	0.508872
GO:0030878	thyroid gland development	biological_process	7	1	339	19	9238	0.508872
GO:0032454	histone demethylase activity (H3-K9 specific	molecular_function	6	1	339	19	9238	0.508872
GO:0005680	anaphase-promoting complex	cellular_component	7	1	339	19	9238	0.508872
GO:0048814	regulation of dendrite morphogenesis	biological_process	9	1	339	19	9238	0.508872
GO:0033613	activating transcription factor binding	molecular_function	7	1	339	19	9238	0.508872
GO:0048247	lymphocyte chemotaxis	biological_process	6	1	339	19	9238	0.508872
GO:0043209	myelin sheath	cellular_component	4	1	339	19	9238	0.508872
GO:0045597	positive regulation of cell differentiation	biological_process	7	1	339	19	9238	0.508872
GO:0003746	translation elongation factor activity	molecular_function	8	1	339	19	9238	0.508872
GO:0097546	ciliary base	cellular_component	5	1	339	19	9238	0.508872
GO:0045880	positive regulation of smoothened signaling pathway	biological_process	9	1	339	19	9238	0.508872
GO:0045773	positive regulation of axon extension	biological_process	8	1	339	19	9238	0.508872
GO:0045499	chemorepellent activity	molecular_function	7	1	339	19	9238	0.508872
GO:0045070	positive regulation of viral genome replication	biological_process	10	1	339	19	9238	0.508872
GO:0001707	mesoderm formation	biological_process	6	1	339	19	9238	0.508872
GO:0007093	mitotic cell cycle checkpoint	biological_process	5	1	339	19	9238	0.508872
GO:0006366	transcription by RNA polymerase II	biological_process	9	3	339	74	9238	0.514114
GO:0009887	animal organ morphogenesis	biological_process	5	2	339	47	9238	0.51911
GO:0046718	viral entry into host cell	biological_process	9	1	339	20	9238	0.526931
GO:0071773	cellular response to BMP stimulus	biological_process	8	1	339	20	9238	0.526931
GO:0030282	bone mineralization	biological_process	7	1	339	20	9238	0.526931
GO:0008305	integrin complex	cellular_component	5	1	339	20	9238	0.526931
GO:0032212	positive regulation of telomere maintenance via telomerase	biological_process	12	1	339	20	9238	0.526931
GO:0032728	positive regulation of interferon-beta production	biological_process	9	1	339	20	9238	0.526931
GO:0008202	steroid metabolic process	biological_process	6	1	339	20	9238	0.526931
GO:0004190	aspartic-type endopeptidase activity	molecular_function	8	1	339	20	9238	0.526931
GO:0044183	protein folding chaperone	molecular_function	3	1	339	20	9238	0.526931
GO:0031297	replication fork processing	biological_process	9	1	339	20	9238	0.526931
GO:0002931	response to ischemia	biological_process	5	1	339	20	9238	0.526931
GO:0004674	protein serine/threonine kinase activity	molecular_function	8	11	339	297	9238	0.531734
GO:0016477	cell migration	biological_process	6	5	339	132	9238	0.535628
GO:0035556	intracellular signal transduction	biological_process	5	11	339	298	9238	0.536298
GO:0005178	integrin binding	molecular_function	6	2	339	49	9238	0.541662
GO:0043154	negative regulation of cysteine-type endopeptidase activity involved in apoptotic process	biological_process	10	2	339	49	9238	0.541662
GO:0004722	protein serine/threonine phosphatase activity	molecular_function	9	2	339	49	9238	0.541662
GO:0006302	double-strand break repair	biological_process	9	2	339	49	9238	0.541662
GO:0043531	ADP binding	molecular_function	9	1	339	21	9238	0.544329
GO:0004693	cyclin-dependent protein serine/threonine kinase activity	molecular_function	9	1	339	21	9238	0.544329
GO:0010592	positive regulation of lamellipodium assembly	biological_process	11	1	339	21	9238	0.544329
GO:0045071	negative regulation of viral genome replication	biological_process	10	1	339	21	9238	0.544329
GO:0019838	growth factor binding	molecular_function	5	1	339	21	9238	0.544329
GO:0035855	megakaryocyte development	biological_process	7	1	339	21	9238	0.544329
GO:0032760	positive regulation of tumor necrosis factor production	biological_process	9	1	339	21	9238	0.544329
GO:0007129	synapsis	biological_process	8	1	339	21	9238	0.544329
GO:0051059	NF-kappaB binding	molecular_function	8	1	339	21	9238	0.544329
GO:0042026	protein refolding	biological_process	5	1	339	21	9238	0.544329
GO:0050900	leukocyte migration	biological_process	4	1	339	21	9238	0.544329
GO:0060170	ciliary membrane	cellular_component	6	1	339	21	9238	0.544329
GO:0051592	response to calcium ion	biological_process	7	1	339	21	9238	0.544329
GO:0051973	positive regulation of telomerase activity	biological_process	8	1	339	21	9238	0.544329
GO:0043552	positive regulation of phosphatidylinositol 3-kinase activity	biological_process	10	1	339	21	9238	0.544329
GO:0034260	negative regulation of GTPase activity	biological_process	8	1	339	21	9238	0.544329
GO:0048514	blood vessel morphogenesis	biological_process	6	1	339	21	9238	0.544329
GO:0005886	plasma membrane	cellular_component	4	62	339	1701	9238	0.546815
GO:0016740	transferase activity	molecular_function	4	26	339	714	9238	0.54717
GO:0003774	motor activity	molecular_function	9	3	339	78	9238	0.549877
GO:0008083	growth factor activity	molecular_function	7	3	339	78	9238	0.549877
GO:0016757	transferase activity, transferring glycosyl groups	molecular_function	5	4	339	107	9238	0.556541
GO:0014069	postsynaptic density	cellular_component	5	4	339	107	9238	0.556541
GO:0007346	regulation of mitotic cell cycle	biological_process	7	1	339	22	9238	0.561088
GO:0005200	structural constituent of cytoskeleton	molecular_function	4	1	339	22	9238	0.561088
GO:0030522	intracellular receptor signaling pathway	biological_process	5	1	339	22	9238	0.561088
GO:0097110	scaffold protein binding	molecular_function	5	1	339	22	9238	0.561088
GO:0048008	platelet-derived growth factor receptor signaling pathway	biological_process	8	1	339	22	9238	0.561088
GO:0097009	energy homeostasis	biological_process	5	1	339	22	9238	0.561088
GO:0043923	positive regulation by host of viral transcription	biological_process	10	1	339	22	9238	0.561088
GO:0048568	embryonic organ development	biological_process	6	1	339	22	9238	0.561088
GO:0044389	ubiquitin-like protein ligase binding	molecular_function	6	1	339	22	9238	0.561088
GO:0006986	response to unfolded protein	biological_process	6	1	339	22	9238	0.561088
GO:0070979	protein K11-linked ubiquitination	biological_process	13	1	339	22	9238	0.561088
GO:0060412	ventricular septum morphogenesis	biological_process	6	1	339	22	9238	0.561088
GO:0042073	intraciliary transport	biological_process	7	1	339	22	9238	0.561088
GO:2000352	negative regulation of endothelial cell apoptotic process	biological_process	11	1	339	22	9238	0.561088
GO:0003148	outflow tract septum morphogenesis	biological_process	6	1	339	22	9238	0.561088
GO:0003785	actin monomer binding	molecular_function	7	1	339	22	9238	0.561088
GO:0004984	olfactory receptor activity	molecular_function	6	6	339	164	9238	0.561727
GO:0050911	detection of chemical stimulus involved in sensory perception of smell	biological_process	7	6	339	164	9238	0.561727
GO:0016311	dephosphorylation	biological_process	7	5	339	136	9238	0.562402
GO:0098869	cellular oxidant detoxification	biological_process	5	2	339	51	9238	0.563472
GO:0008344	adult locomotory behavior	biological_process	5	2	339	51	9238	0.563472
GO:0005198	structural molecule activity	molecular_function	3	3	339	80	9238	0.567169
GO:0003713	transcription coactivator activity	molecular_function	5	6	339	165	9238	0.567729
GO:0001650	fibrillar center	cellular_component	7	4	339	109	9238	0.571305
GO:0007179	transforming growth factor beta receptor signaling pathway	biological_process	8	2	339	52	9238	0.574095
GO:0045893	positive regulation of transcription, DNA-templated	biological_process	9	16	339	446	9238	0.574892
GO:0007015	actin filament organization	biological_process	6	3	339	81	9238	0.575661
GO:0007411	axon guidance	biological_process	6	3	339	81	9238	0.575661
GO:0004003	ATP-dependent DNA helicase activity	molecular_function	11	1	339	23	9238	0.577233
GO:0050839	cell adhesion molecule binding	molecular_function	5	1	339	23	9238	0.577233
GO:0016616	oxidoreductase activity, acting on the CH-OH group of donors, NAD or NADP as acceptor	molecular_function	6	1	339	23	9238	0.577233
GO:0006414	translational elongation	biological_process	8	1	339	23	9238	0.577233
GO:0019706	protein-cysteine S-palmitoyltransferase activity	molecular_function	8	1	339	23	9238	0.577233
GO:0051291	protein heterooligomerization	biological_process	8	1	339	23	9238	0.577233
GO:0000795	synaptonemal complex	cellular_component	8	1	339	23	9238	0.577233
GO:0008536	Ran GTPase binding	molecular_function	9	1	339	23	9238	0.577233
GO:0060291	long-term synaptic potentiation	biological_process	10	1	339	23	9238	0.577233
GO:0001938	positive regulation of endothelial cell proliferation	biological_process	9	1	339	23	9238	0.577233
GO:2001243	negative regulation of intrinsic apoptotic signaling pathway	biological_process	10	1	339	23	9238	0.577233
GO:0032024	positive regulation of insulin secretion	biological_process	11	1	339	23	9238	0.577233
GO:0048661	positive regulation of smooth muscle cell proliferation	biological_process	8	1	339	23	9238	0.577233
GO:0000407	phagophore assembly site	cellular_component	6	1	339	23	9238	0.577233
GO:0051881	regulation of mitochondrial membrane potential	biological_process	6	1	339	23	9238	0.577233
GO:0031462	Cul2-RING ubiquitin ligase complex	cellular_component	7	1	339	23	9238	0.577233
GO:0051233	spindle midzone	cellular_component	6	1	339	23	9238	0.577233
GO:0003690	double-stranded DNA binding	molecular_function	7	2	339	53	9238	0.584529
GO:0006469	negative regulation of protein kinase activity	biological_process	11	2	339	53	9238	0.584529
GO:0044212	transcription regulatory region DNA binding	molecular_function	7	6	339	169	9238	0.591331
GO:0035035	histone acetyltransferase binding	molecular_function	6	1	339	24	9238	0.592786
GO:0010575	positive regulation of vascular endothelial growth factor production	biological_process	8	1	339	24	9238	0.592786
GO:0007040	lysosome organization	biological_process	8	1	339	24	9238	0.592786
GO:0006479	protein methylation	biological_process	10	1	339	24	9238	0.592786
GO:0030145	manganese ion binding	molecular_function	8	1	339	24	9238	0.592786
GO:0030216	keratinocyte differentiation	biological_process	8	1	339	24	9238	0.592786
GO:0006913	nucleocytoplasmic transport	biological_process	8	1	339	24	9238	0.592786
GO:0001657	ureteric bud development	biological_process	7	1	339	24	9238	0.592786
GO:0015935	small ribosomal subunit	cellular_component	7	1	339	24	9238	0.592786
GO:0006284	base-excision repair	biological_process	9	1	339	24	9238	0.592786
GO:0048813	dendrite morphogenesis	biological_process	9	1	339	24	9238	0.592786
GO:0031491	nucleosome binding	molecular_function	5	1	339	24	9238	0.592786
GO:0050776	regulation of immune response	biological_process	6	1	339	24	9238	0.592786
GO:2001235	positive regulation of apoptotic signaling pathway	biological_process	9	1	339	24	9238	0.592786
GO:0003712	transcription coregulator activity	molecular_function	4	2	339	54	9238	0.594774
GO:0005777	peroxisome	cellular_component	7	2	339	54	9238	0.594774
GO:0007608	sensory perception of smell	biological_process	8	6	339	171	9238	0.602878
GO:0005923	bicellular tight junction	cellular_component	6	2	339	55	9238	0.604829
GO:0001666	response to hypoxia	biological_process	5	2	339	55	9238	0.604829
GO:0030425	dendrite	cellular_component	6	5	339	143	9238	0.607305
GO:0050766	positive regulation of phagocytosis	biological_process	8	1	339	25	9238	0.607768
GO:0048839	inner ear development	biological_process	5	1	339	25	9238	0.607768
GO:0001755	neural crest cell migration	biological_process	8	1	339	25	9238	0.607768
GO:0008180	COP9 signalosome	cellular_component	4	1	339	25	9238	0.607768
GO:0060173	limb development	biological_process	6	1	339	25	9238	0.607768
GO:0050714	positive regulation of protein secretion	biological_process	10	1	339	25	9238	0.607768
GO:0048286	lung alveolus development	biological_process	5	1	339	25	9238	0.607768
GO:0008234	cysteine-type peptidase activity	molecular_function	7	2	339	56	9238	0.614694
GO:0000724	double-strand break repair via homologous recombination	biological_process	10	2	339	56	9238	0.614694
GO:0007166	cell surface receptor signaling pathway	biological_process	5	3	339	86	9238	0.61653
GO:0032991	protein-containing complex	cellular_component	3	13	339	373	9238	0.616957
GO:0005102	signaling receptor binding	molecular_function	5	7	339	203	9238	0.620844
GO:0045737	positive regulation of cyclin-dependent protein serine/threonine kinase activity	biological_process	13	1	339	26	9238	0.622201
GO:0030514	negative regulation of BMP signaling pathway	biological_process	11	1	339	26	9238	0.622201
GO:0035019	somatic stem cell population maintenance	biological_process	5	1	339	26	9238	0.622201
GO:0030501	positive regulation of bone mineralization	biological_process	8	1	339	26	9238	0.622201
GO:0042470	melanosome	cellular_component	8	1	339	26	9238	0.622201
GO:0016239	positive regulation of macroautophagy	biological_process	10	1	339	26	9238	0.622201
GO:1900087	positive regulation of G1/S transition of mitotic cell cycle	biological_process	10	1	339	26	9238	0.622201
GO:0051287	NAD binding	molecular_function	6	1	339	26	9238	0.622201
GO:0008092	cytoskeletal protein binding	molecular_function	5	2	339	57	9238	0.62437
GO:0005819	spindle	cellular_component	6	2	339	57	9238	0.62437
GO:0007219	Notch signaling pathway	biological_process	6	2	339	57	9238	0.62437
GO:0045732	positive regulation of protein catabolic process	biological_process	8	2	339	57	9238	0.62437
GO:0055114	oxidation-reduction process	biological_process	4	16	339	461	9238	0.628782
GO:0006351	transcription, DNA-templated	biological_process	8	3	339	88	9238	0.632116
GO:0045087	innate immune response	biological_process	5	3	339	88	9238	0.632116
GO:0043524	negative regulation of neuron apoptotic process	biological_process	10	3	339	88	9238	0.632116
GO:0044325	ion channel binding	molecular_function	5	2	339	58	9238	0.633857
GO:0060828	regulation of canonical Wnt signaling pathway	biological_process	9	1	339	27	9238	0.636103
GO:0007163	establishment or maintenance of cell polarity	biological_process	4	1	339	27	9238	0.636103
GO:0007032	endosome organization	biological_process	7	1	339	27	9238	0.636103
GO:0032435	negative regulation of proteasomal ubiquitin-dependent protein catabolic process	biological_process	12	1	339	27	9238	0.636103
GO:0010862	positive regulation of pathway-restricted SMAD protein phosphorylation	biological_process	11	1	339	27	9238	0.636103
GO:0006936	muscle contraction	biological_process	6	1	339	27	9238	0.636103
GO:0007052	mitotic spindle organization	biological_process	9	1	339	27	9238	0.636103
GO:0006611	protein export from nucleus	biological_process	11	1	339	27	9238	0.636103
GO:0015030	Cajal body	cellular_component	8	1	339	27	9238	0.636103
GO:0009566	fertilization	biological_process	4	1	339	27	9238	0.636103
GO:0032007	negative regulation of TOR signaling	biological_process	10	1	339	27	9238	0.636103
GO:0005876	spindle microtubule	cellular_component	8	1	339	27	9238	0.636103
GO:0006457	protein folding	biological_process	4	3	339	89	9238	0.639743
GO:0022857	transmembrane transporter activity	molecular_function	4	4	339	119	9238	0.640795
GO:0043005	neuron projection	cellular_component	5	4	339	119	9238	0.640795
GO:0060271	cilium assembly	biological_process	7	4	339	119	9238	0.640795
GO:0006325	chromatin organization	biological_process	5	2	339	59	9238	0.643156
GO:0005622	intracellular	cellular_component	4	20	339	579	9238	0.645199
GO:0043025	neuronal cell body	cellular_component	5	4	339	120	9238	0.647326
GO:0040014	regulation of multicellular organism growth	biological_process	7	1	339	28	9238	0.649496
GO:0034613	cellular protein localization	biological_process	6	1	339	28	9238	0.649496
GO:0016236	macroautophagy	biological_process	7	1	339	28	9238	0.649496
GO:0030513	positive regulation of BMP signaling pathway	biological_process	11	1	339	28	9238	0.649496
GO:0051085	chaperone cofactor-dependent protein refolding	biological_process	7	1	339	28	9238	0.649496
GO:0071158	positive regulation of cell cycle arrest	biological_process	9	1	339	28	9238	0.649496
GO:0042149	cellular response to glucose starvation	biological_process	9	1	339	28	9238	0.649496
GO:0045332	phospholipid translocation	biological_process	9	1	339	28	9238	0.649496
GO:0043021	ribonucleoprotein complex binding	molecular_function	5	1	339	28	9238	0.649496
GO:0022625	cytosolic large ribosomal subunit	cellular_component	8	2	339	60	9238	0.652268
GO:1902600	proton transmembrane transport	biological_process	9	2	339	61	9238	0.661195
GO:0030134	COPII-coated ER to Golgi transport vesicle	cellular_component	8	1	339	29	9238	0.662398
GO:2001237	negative regulation of extrinsic apoptotic signaling pathway	biological_process	10	1	339	29	9238	0.662398
GO:0006635	fatty acid beta-oxidation	biological_process	11	1	339	29	9238	0.662398
GO:0071347	cellular response to interleukin-1	biological_process	8	1	339	29	9238	0.662398
GO:0032729	positive regulation of interferon-gamma production	biological_process	8	1	339	29	9238	0.662398
GO:0016235	aggresome	cellular_component	6	1	339	29	9238	0.662398
GO:0048863	stem cell differentiation	biological_process	6	1	339	29	9238	0.662398
GO:0031663	lipopolysaccharide-mediated signaling pathway	biological_process	6	1	339	29	9238	0.662398
GO:0043066	negative regulation of apoptotic process	biological_process	9	9	339	270	9238	0.664064
GO:0006811	ion transport	biological_process	6	6	339	183	9238	0.668267
GO:0005623	cell	cellular_component	3	6	339	184	9238	0.673398
GO:0008630	intrinsic apoptotic signaling pathway in response to DNA damage	biological_process	7	1	339	30	9238	0.674825
GO:0005080	protein kinase C binding	molecular_function	8	1	339	30	9238	0.674825
GO:0042060	wound healing	biological_process	6	1	339	30	9238	0.674825
GO:0001540	amyloid-beta binding	molecular_function	6	1	339	30	9238	0.674825
GO:0006805	xenobiotic metabolic process	biological_process	5	1	339	30	9238	0.674825
GO:0032040	small-subunit processome	cellular_component	6	1	339	30	9238	0.674825
GO:0006096	glycolytic process	biological_process	10	1	339	30	9238	0.674825
GO:0043406	positive regulation of MAP kinase activity	biological_process	12	1	339	30	9238	0.674825
GO:0004129	cytochrome-c oxidase activity	molecular_function	6	1	339	30	9238	0.674825
GO:0031593	polyubiquitin modification-dependent protein binding	molecular_function	6	1	339	30	9238	0.674825
GO:0009058	biosynthetic process	biological_process	4	1	339	30	9238	0.674825
GO:0005905	clathrin-coated pit	cellular_component	4	1	339	30	9238	0.674825
GO:0098982	GABA-ergic synapse	cellular_component	4	1	339	30	9238	0.674825
GO:0045669	positive regulation of osteoblast differentiation	biological_process	8	1	339	30	9238	0.674825
GO:0012505	endomembrane system	cellular_component	4	1	339	30	9238	0.674825
GO:0042802	identical protein binding	molecular_function	5	22	339	646	9238	0.675778
GO:0008022	protein C-terminus binding	molecular_function	5	3	339	94	9238	0.676207
GO:0001764	neuron migration	biological_process	7	2	339	63	9238	0.678496
GO:0032508	DNA duplex unwinding	biological_process	9	1	339	31	9238	0.686797
GO:0008009	chemokine activity	molecular_function	8	1	339	31	9238	0.686797
GO:0042552	myelination	biological_process	6	1	339	31	9238	0.686797
GO:0032720	negative regulation of tumor necrosis factor production	biological_process	9	1	339	31	9238	0.686797
GO:0005844	polysome	cellular_component	5	1	339	31	9238	0.686797
GO:0030136	clathrin-coated vesicle	cellular_component	8	1	339	31	9238	0.686797
GO:0045668	negative regulation of osteoblast differentiation	biological_process	8	1	339	31	9238	0.686797
GO:1990841	promoter-specific chromatin binding	molecular_function	5	1	339	31	9238	0.686797
GO:0005901	caveola	cellular_component	8	1	339	31	9238	0.686797
GO:0004879	nuclear receptor activity	molecular_function	6	1	339	31	9238	0.686797
GO:0030178	negative regulation of Wnt signaling pathway	biological_process	9	1	339	31	9238	0.686797
GO:0031492	nucleosomal DNA binding	molecular_function	8	1	339	31	9238	0.686797
GO:0043410	positive regulation of MAPK cascade	biological_process	11	2	339	64	9238	0.686873
GO:0051865	protein autoubiquitination	biological_process	12	2	339	64	9238	0.686873
GO:0005085	guanyl-nucleotide exchange factor activity	molecular_function	7	3	339	96	9238	0.69001
GO:0007399	nervous system development	biological_process	6	2	339	65	9238	0.695071
GO:0051402	neuron apoptotic process	biological_process	7	1	339	32	9238	0.698329
GO:0048488	synaptic vesicle endocytosis	biological_process	9	1	339	32	9238	0.698329
GO:0032259	methylation	biological_process	4	4	339	129	9238	0.702525
GO:0090263	positive regulation of canonical Wnt signaling pathway	biological_process	10	2	339	66	9238	0.703091
GO:0031012	extracellular matrix	cellular_component	4	4	339	130	9238	0.708257
GO:0042254	ribosome biogenesis	biological_process	6	1	339	33	9238	0.709438
GO:0065003	protein-containing complex assembly	biological_process	6	1	339	33	9238	0.709438
GO:0005788	endoplasmic reticulum lumen	cellular_component	7	1	339	33	9238	0.709438
GO:0048306	calcium-dependent protein binding	molecular_function	5	1	339	33	9238	0.709438
GO:0007204	positive regulation of cytosolic calcium ion concentration	biological_process	13	1	339	33	9238	0.709438
GO:0034605	cellular response to heat	biological_process	6	1	339	33	9238	0.709438
GO:0003684	damaged DNA binding	molecular_function	7	1	339	33	9238	0.709438
GO:0050729	positive regulation of inflammatory response	biological_process	9	1	339	33	9238	0.709438
GO:0016592	mediator complex	cellular_component	4	1	339	33	9238	0.709438
GO:0006260	DNA replication	biological_process	8	2	339	67	9238	0.710936
GO:0043065	positive regulation of apoptotic process	biological_process	9	5	339	162	9238	0.714773
GO:0010468	regulation of gene expression	biological_process	7	5	339	163	9238	0.719808
GO:1903507	negative regulation of nucleic acid-templated transcription	biological_process	10	1	339	34	9238	0.720138
GO:0030855	epithelial cell differentiation	biological_process	6	1	339	34	9238	0.720138
GO:0005518	collagen binding	molecular_function	5	1	339	34	9238	0.720138
GO:0051225	spindle assembly	biological_process	9	1	339	34	9238	0.720138
GO:0071005	U2-type precatalytic spliceosome	cellular_component	8	1	339	34	9238	0.720138
GO:0060021	roof of mouth development	biological_process	5	1	339	34	9238	0.720138
GO:0006464	cellular protein modification process	biological_process	8	1	339	34	9238	0.720138
GO:0007098	centrosome cycle	biological_process	5	1	339	34	9238	0.720138
GO:0035914	skeletal muscle cell differentiation	biological_process	6	1	339	34	9238	0.720138
GO:0005768	endosome	cellular_component	7	5	339	164	9238	0.724779
GO:0004842	ubiquitin-protein transferase activity	molecular_function	6	7	339	225	9238	0.724945
GO:0016301	kinase activity	molecular_function	6	10	339	315	9238	0.725937
GO:0031982	vesicle	cellular_component	5	2	339	69	9238	0.726105
GO:0008013	beta-catenin binding	molecular_function	5	2	339	69	9238	0.726105
GO:1903508	positive regulation of nucleic acid-templated transcription	biological_process	10	2	339	69	9238	0.726105
GO:0006406	mRNA export from nucleus	biological_process	11	1	339	35	9238	0.730446
GO:0004715	non-membrane spanning protein tyrosine kinase activity	molecular_function	9	1	339	35	9238	0.730446
GO:0050830	defense response to Gram-positive bacterium	biological_process	9	1	339	35	9238	0.730446
GO:0015934	large ribosomal subunit	cellular_component	7	1	339	35	9238	0.730446
GO:0048538	thymus development	biological_process	7	1	339	35	9238	0.730446
GO:0030217	T cell differentiation	biological_process	8	1	339	35	9238	0.730446
GO:0007420	brain development	biological_process	6	3	339	103	9238	0.734838
GO:0042127	regulation of cell population proliferation	biological_process	6	3	339	103	9238	0.734838
GO:0005856	cytoskeleton	cellular_component	6	6	339	197	9238	0.735421
GO:0001947	heart looping	biological_process	7	1	339	36	9238	0.740375
GO:0015485	cholesterol binding	molecular_function	7	1	339	36	9238	0.740375
GO:0031648	protein destabilization	biological_process	6	1	339	36	9238	0.740375
GO:0007417	central nervous system development	biological_process	6	1	339	36	9238	0.740375
GO:0007338	single fertilization	biological_process	5	1	339	36	9238	0.740375
GO:0007249	I-kappaB kinase/NF-kappaB signaling	biological_process	6	1	339	36	9238	0.740375
GO:0032482	Rab protein signal transduction	biological_process	8	1	339	36	9238	0.740375
GO:0042383	sarcolemma	cellular_component	5	1	339	36	9238	0.740375
GO:0030593	neutrophil chemotaxis	biological_process	7	1	339	37	9238	0.74994
GO:0009411	response to UV	biological_process	7	1	339	37	9238	0.74994
GO:0005793	endoplasmic reticulum-Golgi intermediate compartment	cellular_component	6	1	339	37	9238	0.74994
GO:0048666	neuron development	biological_process	6	1	339	37	9238	0.74994
GO:0031463	Cul3-RING ubiquitin ligase complex	cellular_component	7	1	339	37	9238	0.74994
GO:0043401	steroid hormone mediated signaling pathway	biological_process	6	1	339	37	9238	0.74994
GO:0004930	G protein-coupled receptor activity	molecular_function	6	11	339	353	9238	0.754109
GO:0004672	protein kinase activity	molecular_function	7	14	339	443	9238	0.756772
GO:0031625	ubiquitin protein ligase binding	molecular_function	7	6	339	202	9238	0.756927
GO:0005815	microtubule organizing center	cellular_component	6	3	339	107	9238	0.758074
GO:0022008	neurogenesis	biological_process	6	1	339	38	9238	0.759153
GO:0030971	receptor tyrosine kinase binding	molecular_function	6	1	339	38	9238	0.759153
GO:0003707	steroid hormone receptor activity	molecular_function	5	1	339	38	9238	0.759153
GO:0032947	protein-containing complex scaffold activity	NA	NA	1	339	38	9238	0.759153
GO:0021915	neural tube development	biological_process	6	1	339	38	9238	0.759153
GO:0051087	chaperone binding	molecular_function	5	2	339	74	9238	0.761105
GO:0042826	histone deacetylase binding	molecular_function	6	2	339	74	9238	0.761105
GO:0006486	protein glycosylation	biological_process	9	2	339	74	9238	0.761105
GO:0010629	negative regulation of gene expression	biological_process	8	4	339	140	9238	0.761184
GO:0000981	DNA-binding transcription factor activity, RNA polymerase II-specific	molecular_function	5	5	339	172	9238	0.762277
GO:0001649	osteoblast differentiation	biological_process	6	1	339	39	9238	0.768028
GO:0010508	positive regulation of autophagy	biological_process	9	1	339	39	9238	0.768028
GO:0000049	tRNA binding	molecular_function	7	1	339	39	9238	0.768028
GO:0001889	liver development	biological_process	7	1	339	39	9238	0.768028
GO:0070374	positive regulation of ERK1 and ERK2 cascade	biological_process	12	3	339	109	9238	0.769063
GO:0008033	tRNA processing	biological_process	11	1	339	40	9238	0.776576
GO:0007626	locomotory behavior	biological_process	4	1	339	40	9238	0.776576
GO:0043085	positive regulation of catalytic activity	biological_process	6	1	339	40	9238	0.776576
GO:0035097	histone methyltransferase complex	cellular_component	6	1	339	40	9238	0.776576
GO:0007389	pattern specification process	biological_process	4	1	339	40	9238	0.776576
GO:0006631	fatty acid metabolic process	biological_process	9	1	339	40	9238	0.776576
GO:0016310	phosphorylation	biological_process	7	10	339	330	9238	0.77679
GO:0000151	ubiquitin ligase complex	cellular_component	5	2	339	77	9238	0.780197
GO:0016055	Wnt signaling pathway	biological_process	7	2	339	77	9238	0.780197
GO:0051082	unfolded protein binding	molecular_function	5	2	339	77	9238	0.780197
GO:0006338	chromatin remodeling	biological_process	6	2	339	77	9238	0.780197
GO:0008285	negative regulation of cell population proliferation	biological_process	7	6	339	208	9238	0.781019
GO:0098685	Schaffer collateral - CA1 synapse	cellular_component	4	1	339	41	9238	0.784811
GO:0007218	neuropeptide signaling pathway	biological_process	6	1	339	41	9238	0.784811
GO:0042626	ATPase activity, coupled to transmembrane movement of substances	molecular_function	8	1	339	41	9238	0.784811
GO:0042531	positive regulation of tyrosine phosphorylation of STAT protein	biological_process	11	1	339	41	9238	0.784811
GO:0006915	apoptotic process	biological_process	6	4	339	146	9238	0.789194
GO:0032147	activation of protein kinase activity	biological_process	12	2	339	79	9238	0.792172
GO:0005516	calmodulin binding	molecular_function	5	2	339	79	9238	0.792172
GO:0045766	positive regulation of angiogenesis	biological_process	8	2	339	79	9238	0.792172
GO:0008286	insulin receptor signaling pathway	biological_process	8	1	339	42	9238	0.792743
GO:0050660	flavin adenine dinucleotide binding	molecular_function	6	1	339	42	9238	0.792743
GO:0007283	spermatogenesis	biological_process	7	4	339	147	9238	0.793598
GO:0000287	magnesium ion binding	molecular_function	7	4	339	147	9238	0.793598
GO:0015031	protein transport	biological_process	9	5	339	180	9238	0.795806
GO:0005770	late endosome	cellular_component	8	2	339	80	9238	0.797942
GO:0005929	cilium	cellular_component	4	3	339	115	9238	0.799607
GO:0005747	mitochondrial respiratory chain complex I	cellular_component	7	1	339	43	9238	0.800383
GO:0045860	positive regulation of protein kinase activity	biological_process	11	1	339	43	9238	0.800383
GO:0022627	cytosolic small ribosomal subunit	cellular_component	8	1	339	43	9238	0.800383
GO:0006919	activation of cysteine-type endopeptidase activity involved in apoptotic process	biological_process	11	1	339	43	9238	0.800383
GO:0042752	regulation of circadian rhythm	biological_process	5	1	339	43	9238	0.800383
GO:0016779	nucleotidyltransferase activity	molecular_function	6	1	339	43	9238	0.800383
GO:0009897	external side of plasma membrane	cellular_component	5	4	339	149	9238	0.802185
GO:0045171	intercellular bridge	cellular_component	4	1	339	44	9238	0.807742
GO:0034599	cellular response to oxidative stress	biological_process	6	1	339	44	9238	0.807742
GO:0010494	cytoplasmic stress granule	cellular_component	8	1	339	44	9238	0.807742
GO:0031514	motile cilium	cellular_component	5	1	339	44	9238	0.807742
GO:0016363	nuclear matrix	cellular_component	6	1	339	44	9238	0.807742
GO:0030900	forebrain development	biological_process	5	1	339	44	9238	0.807742
GO:0032091	negative regulation of protein binding	biological_process	7	1	339	44	9238	0.807742
GO:0003729	mRNA binding	molecular_function	7	3	339	117	9238	0.80901
GO:0004888	transmembrane signaling receptor activity	molecular_function	5	2	339	83	9238	0.814408
GO:0000082	G1/S transition of mitotic cell cycle	biological_process	7	1	339	45	9238	0.814831
GO:0006888	endoplasmic reticulum to Golgi vesicle-mediated transport	biological_process	7	2	339	84	9238	0.819625
GO:0071456	cellular response to hypoxia	biological_process	6	1	339	46	9238	0.82166
GO:0045727	positive regulation of translation	biological_process	10	1	339	46	9238	0.82166
GO:0051603	proteolysis involved in cellular protein catabolic process	biological_process	8	1	339	46	9238	0.82166
GO:0005881	cytoplasmic microtubule	cellular_component	8	1	339	46	9238	0.82166
GO:0001932	regulation of protein phosphorylation	biological_process	9	1	339	46	9238	0.82166
GO:0017053	transcriptional repressor complex	cellular_component	4	1	339	46	9238	0.82166
GO:0009952	anterior/posterior pattern specification	biological_process	6	2	339	85	9238	0.824711
GO:0001228	DNA-binding transcription activator activity, RNA polymerase II-specific	molecular_function	6	7	339	253	9238	0.82667
GO:0031594	neuromuscular junction	cellular_component	4	1	339	47	9238	0.828237
GO:0006887	exocytosis	biological_process	7	1	339	47	9238	0.828237
GO:0031398	positive regulation of protein ubiquitination	biological_process	11	1	339	47	9238	0.828237
GO:0060070	canonical Wnt signaling pathway	biological_process	8	1	339	47	9238	0.828237
GO:0005743	mitochondrial inner membrane	cellular_component	6	3	339	122	9238	0.830903
GO:0046777	protein autophosphorylation	biological_process	10	3	339	122	9238	0.830903
GO:0051117	ATPase binding	molecular_function	6	1	339	48	9238	0.834572
GO:0035064	methylated histone binding	molecular_function	6	1	339	48	9238	0.834572
GO:0043330	response to exogenous dsRNA	biological_process	8	1	339	48	9238	0.834572
GO:0007229	integrin-mediated signaling pathway	biological_process	6	1	339	49	9238	0.840674
GO:0004197	cysteine-type endopeptidase activity	molecular_function	8	1	339	49	9238	0.840674
GO:0008565	protein transporter activity	molecular_function	NA	1	339	49	9238	0.840674
GO:0031647	regulation of protein stability	biological_process	5	1	339	49	9238	0.840674
GO:0046332	SMAD binding	molecular_function	5	1	339	49	9238	0.840674
GO:0034976	response to endoplasmic reticulum stress	biological_process	6	1	339	49	9238	0.840674
GO:0005776	autophagosome	cellular_component	7	1	339	49	9238	0.840674
GO:0004497	monooxygenase activity	molecular_function	5	1	339	49	9238	0.840674
GO:0005215	transporter activity	molecular_function	3	1	339	49	9238	0.840674
GO:0005667	transcription factor complex	cellular_component	4	4	339	160	9238	0.844368
GO:0016874	ligase activity	molecular_function	4	1	339	50	9238	0.846552
GO:0046330	positive regulation of JNK cascade	biological_process	13	1	339	50	9238	0.846552
GO:0005840	ribosome	cellular_component	6	9	339	324	9238	0.847177
GO:0001525	angiogenesis	biological_process	5	2	339	90	9238	0.848257
GO:0043130	ubiquitin binding	molecular_function	6	1	339	51	9238	0.852214
GO:0051260	protein homooligomerization	biological_process	8	3	339	128	9238	0.854305
GO:0006955	immune response	biological_process	4	3	339	128	9238	0.854305
GO:0010628	positive regulation of gene expression	biological_process	8	7	339	263	9238	0.854933
GO:0003824	catalytic activity	molecular_function	3	8	339	296	9238	0.856751
GO:0003730	mRNA 3'-UTR binding	molecular_function	8	1	339	52	9238	0.857667
GO:0007049	cell cycle	biological_process	4	1	339	52	9238	0.857667
GO:0010008	endosome membrane	cellular_component	8	1	339	52	9238	0.857667
GO:0019005	SCF ubiquitin ligase complex	cellular_component	7	1	339	52	9238	0.857667
GO:0007368	determination of left/right symmetry	biological_process	7	1	339	52	9238	0.857667
GO:0006396	RNA processing	biological_process	9	1	339	52	9238	0.857667
GO:0006281	DNA repair	biological_process	8	3	339	129	9238	0.857919
GO:0002250	adaptive immune response	biological_process	5	1	339	53	9238	0.86292
GO:0004175	endopeptidase activity	molecular_function	7	1	339	53	9238	0.86292
GO:0005654	nucleoplasm	cellular_component	6	49	339	1522	9238	0.864422
GO:0019901	protein kinase binding	molecular_function	7	9	339	332	9238	0.866031
GO:0009791	post-embryonic development	biological_process	4	1	339	54	9238	0.867979
GO:0045177	apical part of cell	cellular_component	4	1	339	54	9238	0.867979
GO:0050731	positive regulation of peptidyl-tyrosine phosphorylation	biological_process	11	1	339	54	9238	0.867979
GO:0000398	mRNA splicing, via spliceosome	biological_process	13	2	339	95	9238	0.868896
GO:0016192	vesicle-mediated transport	biological_process	6	4	339	168	9238	0.870077
GO:0003723	RNA binding	molecular_function	6	16	339	554	9238	0.872198
GO:0071013	catalytic step 2 spliceosome	cellular_component	7	1	339	55	9238	0.872852
GO:0036459	thiol-dependent ubiquitinyl hydrolase activity	molecular_function	9	1	339	55	9238	0.872852
GO:0007268	chemical synaptic transmission	biological_process	9	1	339	55	9238	0.872852
GO:0061630	ubiquitin protein ligase activity	molecular_function	7	4	339	169	9238	0.87302
GO:0006412	translation	biological_process	8	11	339	399	9238	0.873259
GO:0007601	visual perception	biological_process	8	1	339	56	9238	0.877546
GO:0005681	spliceosomal complex	cellular_component	6	1	339	56	9238	0.877546
GO:0001501	skeletal system development	biological_process	6	1	339	56	9238	0.877546
GO:0090575	RNA polymerase II transcription factor complex	cellular_component	6	1	339	56	9238	0.877546
GO:0022900	electron transport chain	biological_process	6	1	339	57	9238	0.882067
GO:0036464	cytoplasmic ribonucleoprotein granule	cellular_component	7	1	339	57	9238	0.882067
GO:0006914	autophagy	biological_process	6	1	339	57	9238	0.882067
GO:0006606	protein import into nucleus	biological_process	11	1	339	57	9238	0.882067
GO:0004222	metalloendopeptidase activity	molecular_function	8	1	339	57	9238	0.882067
GO:0016579	protein deubiquitination	biological_process	9	1	339	57	9238	0.882067
GO:0016324	apical plasma membrane	cellular_component	5	2	339	99	9238	0.883519
GO:0035264	multicellular organism growth	biological_process	4	1	339	58	9238	0.886422
GO:0008380	RNA splicing	biological_process	10	1	339	58	9238	0.886422
GO:0042393	histone binding	molecular_function	5	2	339	100	9238	0.886932
GO:0005525	GTP binding	molecular_function	8	8	339	311	9238	0.890115
GO:0007189	adenylate cyclase-activating G protein-coupled receptor signaling pathway	biological_process	8	1	339	59	9238	0.890616
GO:0042147	retrograde transport, endosome to Golgi	biological_process	8	1	339	59	9238	0.890616
GO:0004713	protein tyrosine kinase activity	molecular_function	8	1	339	60	9238	0.894656
GO:0044877	protein-containing complex binding	molecular_function	4	2	339	103	9238	0.896624
GO:0045202	synapse	cellular_component	3	4	339	178	9238	0.897015
GO:0033138	positive regulation of peptidyl-serine phosphorylation	biological_process	11	1	339	61	9238	0.898547
GO:0008134	transcription factor binding	molecular_function	5	5	339	215	9238	0.900926
GO:0006511	ubiquitin-dependent protein catabolic process	biological_process	10	5	339	215	9238	0.900926
GO:0030336	negative regulation of cell migration	biological_process	8	1	339	62	9238	0.902294
[truncated: 104 more rows]
