# Supplementary material for: Mechanisms of Oogenesis-Related Long Non-coding RNAs in Porcine Ovaries Treated With Recombinant Pig Follicle-Stimulating Hormone
Source: Front Vet Sci. 2022 Feb 24;8:838703. doi: 10.3389/fvets.2021.838703 (PMC8908959; doi:10.3389/fvets.2021.838703)
Supplement: Supplementary file 10 [file Table_10.XLSX]

## Sheet: Sheet1
Supplymentary Table-S10 KEGG pathways analysis of differentially lncRNAs expression.
pathway_id	pathway_name	S gene number	TS gene number	B gene number	TB gene number	pvalue
ko05418	Fluid shear stress and atherosclerosis	12	126	112	3528	0.000536767
ko04722	Neurotrophin signaling pathway	13	126	132	3528	0.000712896
ko04520	Adherens junction	9	126	72	3528	0.000900034
ko00480	Glutathione metabolism	6	126	34	3528	0.00108833
ko04810	Regulation of actin cytoskeleton	15	126	177	3528	0.00135231
ko05152	Tuberculosis	13	126	150	3528	0.00233895
ko00982	Drug metabolism - cytochrome P450	5	126	28	3528	0.00272293
ko01524	Platinum drug resistance	7	126	58	3528	0.00413872
ko04670	Leukocyte transendothelial migration	9	126	92	3528	0.00503226
ko05203	Viral carcinogenesis	12	126	156	3528	0.00895028
ko04510	Focal adhesion	12	126	160	3528	0.0108606
ko05211	Renal cell carcinoma	7	126	74	3528	0.0154694
ko04530	Tight junction	11	126	148	3528	0.0155043
ko04015	Rap1 signaling pathway	12	126	168	3528	0.0156189
ko05133	Pertussis	6	126	64	3528	0.025398
ko04931	Insulin resistance	8	126	103	3528	0.0294024
ko00980	Metabolism of xenobiotics by cytochrome P450	4	126	34	3528	0.0314161
ko04910	Insulin signaling pathway	9	126	124	3528	0.0315818
ko00630	Glyoxylate and dicarboxylate metabolism	3	126	20	3528	0.0325228
ko05100	Bacterial invasion of epithelial cells	6	126	69	3528	0.0351802
ko04920	Adipocytokine signaling pathway	6	126	69	3528	0.0351802
ko05410	Hypertrophic cardiomyopathy (HCM	5	126	54	3528	0.041989
ko04666	Fc gamma R-mediated phagocytosis	6	126	72	3528	0.0420787
ko04014	Ras signaling pathway	11	126	174	3528	0.0445252
ko04919	Thyroid hormone signaling pathway	7	126	92	3528	0.0445427
ko04625	C-type lectin receptor signaling pathway	7	126	94	3528	0.0491104
ko05220	Chronic myeloid leukemia	6	126	75	3528	0.0497786
ko05204	Chemical carcinogenesis	4	126	40	3528	0.0526266
ko04062	Chemokine signaling pathway	10	126	159	3528	0.0557741
ko00340	Histidine metabolism	2	126	11	3528	0.0563692
ko05206	MicroRNAs in cancer	8	126	118	3528	0.0582106
ko05412	Arrhythmogenic right ventricular cardiomyopathy (ARVC	4	126	42	3528	0.0610746
ko05205	Proteoglycans in cancer	10	126	162	3528	0.0618258
ko05020	Prion diseases	3	126	27	3528	0.0697504
ko04921	Oxytocin signaling pathway	8	126	123	3528	0.070803
ko00410	beta-Alanine metabolism	2	126	13	3528	0.0763368
ko04668	TNF signaling pathway	6	126	89	3528	0.0965782
ko00260	Glycine, serine and threonine metabolism	3	126	31	3528	0.0968568
ko04151	PI3K-Akt signaling pathway	14	126	270	3528	0.0982423
ko04912	GnRH signaling pathway	6	126	90	3528	0.100601
ko04917	Prolactin signaling pathway	5	126	70	3528	0.103101
ko04216	Ferroptosis	3	126	32	3528	0.104216
ko04928	Parathyroid hormone synthesis, secretion and action	6	126	92	3528	0.10891
ko04660	T cell receptor signaling pathway	6	126	92	3528	0.10891
ko00670	One carbon pool by folate	2	126	16	3528	0.109646
ko04918	Thyroid hormone synthesis	4	126	53	3528	0.119132
ko05414	Dilated cardiomyopathy (DCM)	4	126	53	3528	0.119132
ko05144	Malaria	3	126	34	3528	0.119567
ko04710	Circadian rhythm	3	126	34	3528	0.119567
ko00532	Glycosaminoglycan biosynthesis - chondroitin sulfate / dermatan sulfate	2	126	17	3528	0.12147
ko03015	mRNA surveillance pathway	5	126	76	3528	0.133516
ko04922	Glucagon signaling pathway	5	126	76	3528	0.133516
ko00430	Taurine and hypotaurine metabolism	1	126	4	3528	0.135439
ko00590	Arachidonic acid metabolism	3	126	36	3528	0.135698
ko04146	Peroxisome	4	126	56	3528	0.138042
ko05160	Hepatitis C	7	126	122	3528	0.143795
ko04360	Axon guidance	8	126	145	3528	0.144554
ko04926	Relaxin signaling pathway	6	126	100	3528	0.145506
ko05210	Colorectal cancer	5	126	79	3528	0.150085
ko04330	Notch signaling pathway	3	126	38	3528	0.152533
ko04072	Phospholipase D signaling pathway	7	126	125	3528	0.1572
ko05143	African trypanosomiasis	2	126	20	3528	0.158574
ko05161	Hepatitis B	8	126	149	3528	0.161025
ko05416	Viral myocarditis	3	126	39	3528	0.161189
ko04350	TGF-beta signaling pathway	5	126	81	3528	0.161595
ko05225	Hepatocellular carcinoma	7	126	126	3528	0.161794
ko05200	Pathways in cancer	19	126	420	3528	0.162744
ko05163	Human cytomegalovirus infection	10	126	197	3528	0.163476
ko04114	Oocyte meiosis	6	126	104	3528	0.165685
ko04012	ErbB signaling pathway	5	126	82	3528	0.167482
ko04930	Type II diabetes mellitus	3	126	40	3528	0.169991
ko00860	Porphyrin and chlorophyll metabolism	2	126	21	3528	0.171374
ko04261	Adrenergic signaling in cardiomyocytes	6	126	107	3528	0.181564
ko03410	Base excision repair	2	126	22	3528	0.184338
ko04010	MAPK signaling pathway	11	126	227	3528	0.184673
ko04664	Fc epsilon RI signaling pathway	4	126	63	3528	0.186348
ko04714	Thermogenesis	10	126	203	3528	0.186398
ko04210	Apoptosis	6	126	108	3528	0.186991
ko04620	Toll-like receptor signaling pathway	5	126	86	3528	0.191849
ko04933	AGE-RAGE signaling pathway in diabetic complications	5	126	86	3528	0.191849
ko03320	PPAR signaling pathway	4	126	64	3528	0.193662
ko00524	Neomycin, kanamycin and gentamicin biosynthesis	1	126	6	3528	0.196167
ko00010	Glycolysis / Gluconeogenesis	3	126	43	3528	0.197179
ko00601	Glycosphingolipid biosynthesis - lacto and neolacto series	2	126	23	3528	0.197439
ko05215	Prostate cancer	5	126	87	3528	0.198133
ko05142	Chagas disease (American trypanosomiasis	5	126	88	3528	0.204487
ko04310	Wnt signaling pathway	7	126	135	3528	0.205744
ko04713	Circadian entrainment	4	126	66	3528	0.208553
ko05224	Breast cancer	6	126	113	3528	0.215045
ko05031	Amphetamine addiction	3	126	45	3528	0.215861
ko00052	Galactose metabolism	2	126	25	3528	0.22395
ko04960	Aldosterone-regulated sodium reabsorption	2	126	25	3528	0.22395
ko04514	Cell adhesion molecules (CAMs	5	126	92	3528	0.230563
ko05132	Salmonella infection	4	126	69	3528	0.231479
ko01040	Biosynthesis of unsaturated fatty acids	2	126	26	3528	0.237313
ko00983	Drug metabolism - other enzymes	3	126	48	3528	0.244534
ko04657	IL-17 signaling pathway	4	126	71	3528	0.247101
ko05145	Toxoplasmosis	5	126	95	3528	0.250728
ko04915	Estrogen signaling pathway	5	126	95	3528	0.250728
ko04621	NOD-like receptor signaling pathway	6	126	121	3528	0.262666
ko03030	DNA replication	2	126	28	3528	0.264145
ko04270	Vascular smooth muscle contraction	5	126	97	3528	0.26442
ko04024	cAMP signaling pathway	7	126	146	3528	0.264846
ko04071	Sphingolipid signaling pathway	5	126	98	3528	0.271331
ko05230	Central carbon metabolism in cancer	3	126	51	3528	0.27378
ko04924	Renin secretion	3	126	51	3528	0.27378
ko04215	Apoptosis - multiple species	2	126	29	3528	0.277577
ko00053	Ascorbate and aldarate metabolism	1	126	9	3528	0.279412
ko04022	cGMP-PKG signaling pathway	6	126	124	3528	0.281221
ko05167	Kaposi sarcoma-associated herpesvirus infection	7	126	152	3528	0.298959
ko01522	Endocrine resistance	4	126	78	3528	0.303341
ko05223	Non-small cell lung cancer	3	126	54	3528	0.30338
ko00061	Fatty acid biosynthesis	1	126	10	3528	0.305213
ko00592	alpha-Linolenic acid metabolism	1	126	10	3528	0.305213
ko00360	Phenylalanine metabolism	1	126	10	3528	0.305213
ko04950	Maturity onset diabetes of the young	1	126	10	3528	0.305213
ko05140	Leishmaniasis	3	126	55	3528	0.31329
ko04911	Insulin secretion	3	126	55	3528	0.31329
ko04150	mTOR signaling pathway	6	126	130	3528	0.319162
ko04725	Cholinergic synapse	4	126	80	3528	0.319711
ko04916	Melanogenesis	4	126	80	3528	0.319711
ko04152	AMPK signaling pathway	5	126	105	3528	0.320669
ko05166	Human T-cell leukemia virus 1 infection	8	126	183	3528	0.32916
ko05030	Cocaine addiction	2	126	33	3528	0.331015
ko04390	Hippo signaling pathway	6	126	132	3528	0.331998
ko05213	Endometrial cancer	3	126	57	3528	0.333132
ko04371	Apelin signaling pathway	5	126	108	3528	0.342175
ko04260	Cardiac muscle contraction	3	126	58	3528	0.343051
ko03440	Homologous recombination	2	126	34	3528	0.34423
ko00071	Fatty acid degradation	2	126	34	3528	0.34423
ko04658	Th1 and Th2 cell differentiation	4	126	84	3528	0.352634
ko05162	Measles	5	126	110	3528	0.356578
ko00565	Ether lipid metabolism	2	126	35	3528	0.357363
ko04972	Pancreatic secretion	3	126	60	3528	0.362853
ko04068	FoxO signaling pathway	5	126	111	3528	0.363792
ko05214	Glioma	3	126	61	3528	0.372724
ko00591	Linoleic acid metabolism	1	126	13	3528	0.377244
ko04540	Gap junction	3	126	62	3528	0.382568
ko03420	Nucleotide excision repair	2	126	37	3528	0.383338
ko04932	Non-alcoholic fatty liver disease (NAFLD	6	126	141	3528	0.390379
ko00510	N-Glycan biosynthesis	2	126	38	3528	0.39616
ko03430	Mismatch repair	1	126	14	3528	0.399567
ko04380	Osteoclast differentiation	4	126	90	3528	0.402026
ko05231	Choline metabolism in cancer	4	126	91	3528	0.410213
ko00533	Glycosaminoglycan biosynthesis - keratan sulfate	1	126	15	3528	0.421097
ko05146	Amoebiasis	3	126	67	3528	0.431195
ko05034	Alcoholism	5	126	121	3528	0.43579
ko01521	EGFR tyrosine kinase inhibitor resistance	3	126	68	3528	0.440768
ko05212	Pancreatic cancer	3	126	68	3528	0.440768
ko00514	Other types of O-glycan biosynthesis	1	126	16	3528	0.44186
ko04962	Vasopressin-regulated water reabsorption	2	126	43	3528	0.458309
ko05010	Alzheimer disease	6	126	152	3528	0.46165
ko04611	Platelet activation	4	126	98	3528	0.466761
ko04925	Aldosterone synthesis and secretion	3	126	72	3528	0.47842
ko05221	Acute myeloid leukemia	3	126	72	3528	0.47842
ko05016	Huntington disease	6	126	155	3528	0.480805
ko00120	Primary bile acid biosynthesis	1	126	18	3528	0.481196
ko00515	Mannose type O-glycan biosynthesis	1	126	18	3528	0.481196
ko00250	Alanine, aspartate and glutamate metabolism	1	126	18	3528	0.481196
ko03460	Fanconi anemia pathway	2	126	45	3528	0.482135
ko04720	Long-term potentiation	2	126	45	3528	0.482135
ko04728	Dopaminergic synapse	4	126	100	3528	0.48259
ko05164	Influenza A	5	126	128	3528	0.485249
ko05218	Melanoma	2	126	46	3528	0.493808
ko04370	VEGF signaling pathway	2	126	46	3528	0.493808
ko00603	Glycosphingolipid biosynthesis - globo and isoglobo series	1	126	19	3528	0.49982
ko00620	Pyruvate metabolism	1	126	19	3528	0.49982
ko05134	Legionellosis	2	126	47	3528	0.505315
ko05226	Gastric cancer	4	126	103	3528	0.505986
ko04914	Progesterone-mediated oocyte maturation	3	126	76	3528	0.514879
ko04550	Signaling pathways regulating pluripotency of stem cells	4	126	105	3528	0.521329
ko04650	Natural killer cell mediated cytotoxicity	3	126	77	3528	0.523785
ko04612	Antigen processing and presentation	2	126	49	3528	0.52782
ko00500	Starch and sucrose metabolism	1	126	21	3528	0.5351
ko04213	Longevity regulating pathway - multiple species	2	126	50	3528	0.538814
ko04211	Longevity regulating pathway	3	126	79	3528	0.54133
ko04110	Cell cycle	4	126	109	3528	0.551332
ko00380	Tryptophan metabolism	1	126	22	3528	0.551803
ko04744	Phototransduction	1	126	22	3528	0.551803
ko00350	Tyrosine metabolism	1	126	22	3528	0.551803
ko04392	Hippo signaling pathway - multiple species	1	126	23	3528	0.567911
ko00520	Amino sugar and nucleotide sugar metabolism	2	126	53	3528	0.570734
ko04662	B cell receptor signaling pathway	2	126	53	3528	0.570734
ko04066	HIF-1 signaling pathway	3	126	83	3528	0.575294
ko04927	Cortisol synthesis and secretion	2	126	54	3528	0.581017
ko00760	Nicotinate and nicotinamide metabolism	1	126	24	3528	0.583444
ko05150	Staphylococcus aureus infection	1	126	24	3528	0.583444
ko05216	Thyroid cancer	1	126	25	3528	0.598423
ko00563	Glycosylphosphatidylinositol (GPI)-anchor biosynthesis	1	126	25	3528	0.598423
ko00051	Fructose and mannose metabolism	1	126	25	3528	0.598423
ko04659	Th17 cell differentiation	3	126	86	3528	0.599731
ko04217	Necroptosis	4	126	117	3528	0.608274
ko04144	Endocytosis	7	126	207	3528	0.616438
ko03018	RNA degradation	2	126	58	3528	0.620346
ko04140	Autophagy - animal	4	126	119	3528	0.621815
ko05219	Bladder cancer	1	126	28	3528	0.640228
ko04975	Fat digestion and absorption	1	126	29	3528	0.653179
ko00330	Arginine and proline metabolism	1	126	29	3528	0.653179
ko05170	Human immunodeficiency virus 1 infection	6	126	185	3528	0.6566
ko04740	Olfactory transduction	4	126	125	3528	0.660664
ko04622	RIG-I-like receptor signaling pathway	2	126	63	3528	0.665471
ko04973	Carbohydrate digestion and absorption	1	126	30	3528	0.665668
ko04630	Jak-STAT signaling pathway	4	126	126	3528	0.666875
ko05014	Amyotrophic lateral sclerosis (ALS	1	126	31	3528	0.677711
ko04934	Cushing syndrome	4	126	128	3528	0.679065
ko04723	Retrograde endocannabinoid signaling	3	126	97	3528	0.68129
ko05322	Systemic lupus erythematosus	2	126	65	3528	0.682285
ko04742	Taste transduction	1	126	32	3528	0.689324
ko04750	Inflammatory mediator regulation of TRP channels	2	126	66	3528	0.690433
ko05165	Human papillomavirus infection	8	126	257	3528	0.710316
ko04060	Cytokine-cytokine receptor interaction	5	126	171	3528	0.740684
ko04974	Protein digestion and absorption	1	126	37	3528	0.741444
ko00280	Valine, leucine and isoleucine degradation	1	126	37	3528	0.741444
ko04137	Mitophagy - animal	2	126	73	3528	0.74278
ko03010	Ribosome	3	126	109	3528	0.755616
ko04610	Complement and coagulation cascades	1	126	39	3528	0.759774
ko00561	Glycerolipid metabolism	1	126	40	3528	0.768449
ko05168	Herpes simplex virus 1 infection	9	126	305	3528	0.775067
ko04730	Long-term depression	1	126	41	3528	0.776814
ko04971	Gastric acid secretion	1	126	44	3528	0.800151
ko04976	Bile secretion	1	126	45	3528	0.807378
ko04115	p53 signaling pathway	1	126	45	3528	0.807378
ko04970	Salivary secretion	1	126	45	3528	0.807378
ko04340	Hedgehog signaling pathway	1	126	46	3528	0.814346
ko00310	Lysine degradation	1	126	48	3528	0.827541
ko04727	GABAergic synapse	1	126	51	3528	0.845609
ko04145	Phagosome	2	126	94	3528	0.856832
ko05323	Rheumatoid arthritis	1	126	54	3528	0.861797
ko03008	Ribosome biogenesis in eukaryotes	1	126	59	3528	0.885119
ko00190	Oxidative phosphorylation	2	126	103	3528	0.889885
ko00564	Glycerophospholipid metabolism	1	126	61	3528	0.893314
ko05202	Transcriptional misregulation in cancer	3	126	147	3528	0.903949
ko04080	Neuroactive ligand-receptor interaction	3	126	152	3528	0.915791
ko04640	Hematopoietic cell lineage	1	126	69	3528	0.920685
ko04724	Glutamatergic synapse	1	126	70	3528	0.923574
ko05012	Parkinson disease	2	126	116	3528	0.925374
ko04726	Serotonergic synapse	1	126	75	3528	0.936526
ko04070	Phosphatidylinositol signaling system	1	126	82	3528	0.95108
ko03013	RNA transport	2	126	131	3528	0.952957
ko04218	Cellular senescence	2	126	134	3528	0.957166
ko04141	Protein processing in endoplasmic reticulum	2	126	151	3528	0.975019
ko04120	Ubiquitin mediated proteolysis	2	126	154	3528	0.977317
ko05169	Epstein-Barr virus infection	2	126	162	3528	0.982495
ko03040	Spliceosome	1	126	111	3528	0.983465
ko04020	Calcium signaling pathway	1	126	121	3528	0.98865
